# Supplementary material for: Synthetic and genomic regulatory elements reveal aspects of cis-regulatory grammar in mouse embryonic stem cells
Source: eLife. 2020 Feb 11;9:e41279. doi: 10.7554/eLife.41279 (PMC7077988; doi:10.7554/eLife.41279)
Supplement: Supplementary file 1. [file elife-41279-supp1.xlsx]

## Sheet: 1A - SYN_LibraryComposition
Element class	Unique Elements	Unique Element-Barcode Pairs
2-mers	48	384
3-mers	192	1536
4-mers	384	3072
Basal	1	112
Total library size	625	5104

## Sheet: 1B - SYN_LibraryDesign
Barcode	Element_id	Sequence
AAACACTTG	Or-Kr-Er-Sf_synthetic	AGCTACGATTAGCATCCCGTAGCTAGCGGCCCCACCCCGTAGCTACGTGACCTTGAACGTAGCTACGCTCATTGTTTCGT
AAACCAAGT	Er-Or_synthetic	AGCTACGTGACCTTGAACGTAGCTACGATTAGCATCCCGT
AAACCACAA	Or-Sr-Kf-Er_synthetic	AGCTACGATTAGCATCCCGTAGCTACGAAACAATGAGCGTAGCTACGGGGTGGGGCCGCTAGCTACGTGACCTTGAACGT
AAACCAGAC	Kf-Er-Sr-Of_synthetic	AGCTACGGGGTGGGGCCGCTAGCTACGTGACCTTGAACGTAGCTACGAAACAATGAGCGTAGCTACGGGATGCTAATCGT
AAACCAGTG	Kr-Sf-Ef-Or_synthetic	AGCTAGCGGCCCCACCCCGTAGCTACGCTCATTGTTTCGTAGCTACGTTCAAGGTCACGTAGCTACGATTAGCATCCCGT
AAACCCTCG	Ef-Kf-Sf-Or_synthetic	AGCTACGTTCAAGGTCACGTAGCTACGGGGTGGGGCCGCTAGCTACGCTCATTGTTTCGTAGCTACGATTAGCATCCCGT
AAACCGACG	Of-Sr-Kr-Ef_synthetic	AGCTACGGGATGCTAATCGTAGCTACGAAACAATGAGCGTAGCTAGCGGCCCCACCCCGTAGCTACGTTCAAGGTCACGT
AAACCGCAG	Kf-Or-Sf-Ef_synthetic	AGCTACGGGGTGGGGCCGCTAGCTACGATTAGCATCCCGTAGCTACGCTCATTGTTTCGTAGCTACGTTCAAGGTCACGT
AAACGACCC	Er-Kf-Sr_synthetic	AGCTACGTGACCTTGAACGTAGCTACGGGGTGGGGCCGCTAGCTACGAAACAATGAGCGT
AAACGACGA	Er-Kr-Sf-Or_synthetic	AGCTACGTGACCTTGAACGTAGCTAGCGGCCCCACCCCGTAGCTACGCTCATTGTTTCGTAGCTACGATTAGCATCCCGT
AAACGCAGT	Kr-Of-Er_synthetic	AGCTAGCGGCCCCACCCCGTAGCTACGGGATGCTAATCGTAGCTACGTGACCTTGAACGT
AAACGCTTC	Sf-Kr-Ef-Of_synthetic	AGCTACGCTCATTGTTTCGTAGCTAGCGGCCCCACCCCGTAGCTACGTTCAAGGTCACGTAGCTACGGGATGCTAATCGT
AAACGGACT	Ef-Sr_synthetic	AGCTACGTTCAAGGTCACGTAGCTACGAAACAATGAGCGT
AAACGGCTG	Sr-Kf-Or-Er_synthetic	AGCTACGAAACAATGAGCGTAGCTACGGGGTGGGGCCGCTAGCTACGATTAGCATCCCGTAGCTACGTGACCTTGAACGT
AAACGGGTC	Of-Er-Sf-Kf_synthetic	AGCTACGGGATGCTAATCGTAGCTACGTGACCTTGAACGTAGCTACGCTCATTGTTTCGTAGCTACGGGGTGGGGCCGCT
AAACGGTTA	Kf-Of-Er-Sf_synthetic	AGCTACGGGGTGGGGCCGCTAGCTACGGGATGCTAATCGTAGCTACGTGACCTTGAACGTAGCTACGCTCATTGTTTCGT
AAACGTCCG	Ef-Kf-Sf_synthetic	AGCTACGTTCAAGGTCACGTAGCTACGGGGTGGGGCCGCTAGCTACGCTCATTGTTTCGT
AAACTCCGT	Or-Sr-Ef_synthetic	AGCTACGATTAGCATCCCGTAGCTACGAAACAATGAGCGTAGCTACGTTCAAGGTCACGT
AAACTTTCC	Or-Sr-Ef-Kr_synthetic	AGCTACGATTAGCATCCCGTAGCTACGAAACAATGAGCGTAGCTACGTTCAAGGTCACGTAGCTAGCGGCCCCACCCCGT
AAAGACGAT	Of-Er-Kf-Sr_synthetic	AGCTACGGGATGCTAATCGTAGCTACGTGACCTTGAACGTAGCTACGGGGTGGGGCCGCTAGCTACGAAACAATGAGCGT
AAAGATCTG	Er-Kr-Sr-Of_synthetic	AGCTACGTGACCTTGAACGTAGCTAGCGGCCCCACCCCGTAGCTACGAAACAATGAGCGTAGCTACGGGATGCTAATCGT
AAAGCAATC	Kr-Of-Ef-Sr_synthetic	AGCTAGCGGCCCCACCCCGTAGCTACGGGATGCTAATCGTAGCTACGTTCAAGGTCACGTAGCTACGAAACAATGAGCGT
AAAGCACCA	Sr-Of_synthetic	AGCTACGAAACAATGAGCGTAGCTACGGGATGCTAATCGT
AAAGCATCT	Kf-Of-Sf-Er_synthetic	AGCTACGGGGTGGGGCCGCTAGCTACGGGATGCTAATCGTAGCTACGCTCATTGTTTCGTAGCTACGTGACCTTGAACGT
AAAGCCGGT	Ef-Kf-Or_synthetic	AGCTACGTTCAAGGTCACGTAGCTACGGGGTGGGGCCGCTAGCTACGATTAGCATCCCGT
AAAGCCTTG	Of-Er-Sr_synthetic	AGCTACGGGATGCTAATCGTAGCTACGTGACCTTGAACGTAGCTACGAAACAATGAGCGT
AAAGCGACT	Of-Sr-Ef-Kr_synthetic	AGCTACGGGATGCTAATCGTAGCTACGAAACAATGAGCGTAGCTACGTTCAAGGTCACGTAGCTAGCGGCCCCACCCCGT
AAAGCGATG	Kr-Ef-Of-Sf_synthetic	AGCTAGCGGCCCCACCCCGTAGCTACGTTCAAGGTCACGTAGCTACGGGATGCTAATCGTAGCTACGCTCATTGTTTCGT
AAAGCGTCC	Of-Kr-Sr_synthetic	AGCTACGGGATGCTAATCGTAGCTAGCGGCCCCACCCCGTAGCTACGAAACAATGAGCGT
AAAGCTAGA	Ef-Of-Kf_synthetic	AGCTACGTTCAAGGTCACGTAGCTACGGGATGCTAATCGTAGCTACGGGGTGGGGCCGCT
AAAGGAGAT	Of-Ef-Kr-Sf_synthetic	AGCTACGGGATGCTAATCGTAGCTACGTTCAAGGTCACGTAGCTAGCGGCCCCACCCCGTAGCTACGCTCATTGTTTCGT
AAAGGCCCG	Or-Sf-Er_synthetic	AGCTACGATTAGCATCCCGTAGCTACGCTCATTGTTTCGTAGCTACGTGACCTTGAACGT
AAAGGGACG	Sr-Of-Ef-Kf_synthetic	AGCTACGAAACAATGAGCGTAGCTACGGGATGCTAATCGTAGCTACGTTCAAGGTCACGTAGCTACGGGGTGGGGCCGCT
AAAGGGCAG	Of-Kf-Sf-Ef_synthetic	AGCTACGGGATGCTAATCGTAGCTACGGGGTGGGGCCGCTAGCTACGCTCATTGTTTCGTAGCTACGTTCAAGGTCACGT
AAAGGGTCA	Sf-Kf-Or_synthetic	AGCTACGCTCATTGTTTCGTAGCTACGGGGTGGGGCCGCTAGCTACGATTAGCATCCCGT
AAAGGTTGG	Kf-Sf-Or_synthetic	AGCTACGGGGTGGGGCCGCTAGCTACGCTCATTGTTTCGTAGCTACGATTAGCATCCCGT
AAAGTAACG	Sf-Kf-Or-Er_synthetic	AGCTACGCTCATTGTTTCGTAGCTACGGGGTGGGGCCGCTAGCTACGATTAGCATCCCGTAGCTACGTGACCTTGAACGT
AAAGTCATC	Or-Kf-Er-Sr_synthetic	AGCTACGATTAGCATCCCGTAGCTACGGGGTGGGGCCGCTAGCTACGTGACCTTGAACGTAGCTACGAAACAATGAGCGT
AAAGTCCAT	Ef-Sr-Or_synthetic	AGCTACGTTCAAGGTCACGTAGCTACGAAACAATGAGCGTAGCTACGATTAGCATCCCGT
AAAGTCGCA	Sr-Of-Kr-Er_synthetic	AGCTACGAAACAATGAGCGTAGCTACGGGATGCTAATCGTAGCTAGCGGCCCCACCCCGTAGCTACGTGACCTTGAACGT
AAAGTGGAG	Sf-Kf-Ef-Or_synthetic	AGCTACGCTCATTGTTTCGTAGCTACGGGGTGGGGCCGCTAGCTACGTTCAAGGTCACGTAGCTACGATTAGCATCCCGT
AAAGTTCCG	Or-Kr-Sf-Ef_synthetic	AGCTACGATTAGCATCCCGTAGCTAGCGGCCCCACCCCGTAGCTACGCTCATTGTTTCGTAGCTACGTTCAAGGTCACGT
AAATAGACC	Er-Of-Kr_synthetic	AGCTACGTGACCTTGAACGTAGCTACGGGATGCTAATCGTAGCTAGCGGCCCCACCCCGT
AAATAGCGC	Ef-Kf-Sr-Or_synthetic	AGCTACGTTCAAGGTCACGTAGCTACGGGGTGGGGCCGCTAGCTACGAAACAATGAGCGTAGCTACGATTAGCATCCCGT
AAATAGCTG	Sr-Er-Or_synthetic	AGCTACGAAACAATGAGCGTAGCTACGTGACCTTGAACGTAGCTACGATTAGCATCCCGT
AAATCCACT	Ef-Of-Sr-Kf_synthetic	AGCTACGTTCAAGGTCACGTAGCTACGGGATGCTAATCGTAGCTACGAAACAATGAGCGTAGCTACGGGGTGGGGCCGCT
AAATCGCGG	Sf-Kr-Or-Ef_synthetic	AGCTACGCTCATTGTTTCGTAGCTAGCGGCCCCACCCCGTAGCTACGATTAGCATCCCGTAGCTACGTTCAAGGTCACGT
AAATCGTCA	Or-Kf-Sr-Er_synthetic	AGCTACGATTAGCATCCCGTAGCTACGGGGTGGGGCCGCTAGCTACGAAACAATGAGCGTAGCTACGTGACCTTGAACGT
AAATGCATG	Sf-Kf-Of-Er_synthetic	AGCTACGCTCATTGTTTCGTAGCTACGGGGTGGGGCCGCTAGCTACGGGATGCTAATCGTAGCTACGTGACCTTGAACGT
AAATGCCAA	Of-Er-Kr_synthetic	AGCTACGGGATGCTAATCGTAGCTACGTGACCTTGAACGTAGCTAGCGGCCCCACCCCGT
AAATGCGCG	Of-Er-Kr-Sf_synthetic	AGCTACGGGATGCTAATCGTAGCTACGTGACCTTGAACGTAGCTAGCGGCCCCACCCCGTAGCTACGCTCATTGTTTCGT
AAATGGACA	Kr-Or-Sf-Er_synthetic	AGCTAGCGGCCCCACCCCGTAGCTACGATTAGCATCCCGTAGCTACGCTCATTGTTTCGTAGCTACGTGACCTTGAACGT
AAATGTGAG	Sr-Kr-Of-Er_synthetic	AGCTACGAAACAATGAGCGTAGCTAGCGGCCCCACCCCGTAGCTACGGGATGCTAATCGTAGCTACGTGACCTTGAACGT
AAATTACGG	Kf-Sf-Ef_synthetic	AGCTACGGGGTGGGGCCGCTAGCTACGCTCATTGTTTCGTAGCTACGTTCAAGGTCACGT
AAATTCGTC	Ef-Kf-Sf_synthetic	AGCTACGTTCAAGGTCACGTAGCTACGGGGTGGGGCCGCTAGCTACGCTCATTGTTTCGT
AAATTGGCA	Sf-Kf-Or_synthetic	AGCTACGCTCATTGTTTCGTAGCTACGGGGTGGGGCCGCTAGCTACGATTAGCATCCCGT
AACAAATCG	Ef-Sr-Of-Kr_synthetic	AGCTACGTTCAAGGTCACGTAGCTACGAAACAATGAGCGTAGCTACGGGATGCTAATCGTAGCTAGCGGCCCCACCCCGT
AACAACCCG	Kr-Ef-Sr_synthetic	AGCTAGCGGCCCCACCCCGTAGCTACGTTCAAGGTCACGTAGCTACGAAACAATGAGCGT
AACAAGGAA	Sf-Or-Kf_synthetic	AGCTACGCTCATTGTTTCGTAGCTACGATTAGCATCCCGTAGCTACGGGGTGGGGCCGCT
AACAATGCA	Kr-Of_synthetic	AGCTAGCGGCCCCACCCCGTAGCTACGGGATGCTAATCGT
AACACAGCA	Sf-Of-Kr_synthetic	AGCTACGCTCATTGTTTCGTAGCTACGGGATGCTAATCGTAGCTAGCGGCCCCACCCCGT
AACACCCGT	Sr-Kf-Or_synthetic	AGCTACGAAACAATGAGCGTAGCTACGGGGTGGGGCCGCTAGCTACGATTAGCATCCCGT
AACACCTCG	Kr-Or-Sr-Ef_synthetic	AGCTAGCGGCCCCACCCCGTAGCTACGATTAGCATCCCGTAGCTACGAAACAATGAGCGTAGCTACGTTCAAGGTCACGT
AACACGAAA	Or-Sf-Er_synthetic	AGCTACGATTAGCATCCCGTAGCTACGCTCATTGTTTCGTAGCTACGTGACCTTGAACGT
AACACGACT	Ef-Or_synthetic	AGCTACGTTCAAGGTCACGTAGCTACGATTAGCATCCCGT
AACACGTAC	Kr-Sf-Or-Er_synthetic	AGCTAGCGGCCCCACCCCGTAGCTACGCTCATTGTTTCGTAGCTACGATTAGCATCCCGTAGCTACGTGACCTTGAACGT
AACACTCTC	Kr-Of_synthetic	AGCTAGCGGCCCCACCCCGTAGCTACGGGATGCTAATCGT
AACACTGGC	Kf-Sf-Or-Er_synthetic	AGCTACGGGGTGGGGCCGCTAGCTACGCTCATTGTTTCGTAGCTACGATTAGCATCCCGTAGCTACGTGACCTTGAACGT
AACACTTCT	Er-Kr-Sr-Or_synthetic	AGCTACGTGACCTTGAACGTAGCTAGCGGCCCCACCCCGTAGCTACGAAACAATGAGCGTAGCTACGATTAGCATCCCGT
AACAGATCA	Kr-Er_synthetic	AGCTAGCGGCCCCACCCCGTAGCTACGTGACCTTGAACGT
AACAGCTCC	Of-Ef_synthetic	AGCTACGGGATGCTAATCGTAGCTACGTTCAAGGTCACGT
AACAGGGCC	Ef-Kf-Sf-Or_synthetic	AGCTACGTTCAAGGTCACGTAGCTACGGGGTGGGGCCGCTAGCTACGCTCATTGTTTCGTAGCTACGATTAGCATCCCGT
AACATCAGT	Kr-Of-Er-Sr_synthetic	AGCTAGCGGCCCCACCCCGTAGCTACGGGATGCTAATCGTAGCTACGTGACCTTGAACGTAGCTACGAAACAATGAGCGT
AACATGGAT	Sf-Kf-Of-Er_synthetic	AGCTACGCTCATTGTTTCGTAGCTACGGGGTGGGGCCGCTAGCTACGGGATGCTAATCGTAGCTACGTGACCTTGAACGT
AACATGTCG	Sf-Kf-Of-Er_synthetic	AGCTACGCTCATTGTTTCGTAGCTACGGGGTGGGGCCGCTAGCTACGGGATGCTAATCGTAGCTACGTGACCTTGAACGT
AACATTGGA	Or-Sf-Ef-Kr_synthetic	AGCTACGATTAGCATCCCGTAGCTACGCTCATTGTTTCGTAGCTACGTTCAAGGTCACGTAGCTAGCGGCCCCACCCCGT
AACCAAATC	Of-Ef-Sr-Kf_synthetic	AGCTACGGGATGCTAATCGTAGCTACGTTCAAGGTCACGTAGCTACGAAACAATGAGCGTAGCTACGGGGTGGGGCCGCT
AACCAAGTA	Ef-Kf-Of-Sf_synthetic	AGCTACGTTCAAGGTCACGTAGCTACGGGGTGGGGCCGCTAGCTACGGGATGCTAATCGTAGCTACGCTCATTGTTTCGT
AACCACCGT	Sf-Or-Kr_synthetic	AGCTACGCTCATTGTTTCGTAGCTACGATTAGCATCCCGTAGCTAGCGGCCCCACCCCGT
AACCACGGC	Kr-Or-Sr-Ef_synthetic	AGCTAGCGGCCCCACCCCGTAGCTACGATTAGCATCCCGTAGCTACGAAACAATGAGCGTAGCTACGTTCAAGGTCACGT
AACCACTCT	Or-Kr-Ef-Sf_synthetic	AGCTACGATTAGCATCCCGTAGCTAGCGGCCCCACCCCGTAGCTACGTTCAAGGTCACGTAGCTACGCTCATTGTTTCGT
AACCAGATG	Er-Or-Kr_synthetic	AGCTACGTGACCTTGAACGTAGCTACGATTAGCATCCCGTAGCTAGCGGCCCCACCCCGT
AACCATCTA	Ef-Or-Sr-Kf_synthetic	AGCTACGTTCAAGGTCACGTAGCTACGATTAGCATCCCGTAGCTACGAAACAATGAGCGTAGCTACGGGGTGGGGCCGCT
AACCATTTC	Or-Sr-Er_synthetic	AGCTACGATTAGCATCCCGTAGCTACGAAACAATGAGCGTAGCTACGTGACCTTGAACGT
AACCCAATA	Ef-Or-Sf_synthetic	AGCTACGTTCAAGGTCACGTAGCTACGATTAGCATCCCGTAGCTACGCTCATTGTTTCGT
AACCCTCTT	Ef-Of-Sr-Kf_synthetic	AGCTACGTTCAAGGTCACGTAGCTACGGGATGCTAATCGTAGCTACGAAACAATGAGCGTAGCTACGGGGTGGGGCCGCT
AACCCTGAG	Sf-Er-Of_synthetic	AGCTACGCTCATTGTTTCGTAGCTACGTGACCTTGAACGTAGCTACGGGATGCTAATCGT
AACCCTGTA	Sf-Or-Er_synthetic	AGCTACGCTCATTGTTTCGTAGCTACGATTAGCATCCCGTAGCTACGTGACCTTGAACGT
AACCGAGCA	Sr-Kr-Or-Ef_synthetic	AGCTACGAAACAATGAGCGTAGCTAGCGGCCCCACCCCGTAGCTACGATTAGCATCCCGTAGCTACGTTCAAGGTCACGT
AACCGAGTT	Sr-Ef-Or-Kf_synthetic	AGCTACGAAACAATGAGCGTAGCTACGTTCAAGGTCACGTAGCTACGATTAGCATCCCGTAGCTACGGGGTGGGGCCGCT
AACCGCCAC	Sr-Of-Er-Kf_synthetic	AGCTACGAAACAATGAGCGTAGCTACGGGATGCTAATCGTAGCTACGTGACCTTGAACGTAGCTACGGGGTGGGGCCGCT
AACCGGTGT	Kf-Or-Sr-Er_synthetic	AGCTACGGGGTGGGGCCGCTAGCTACGATTAGCATCCCGTAGCTACGAAACAATGAGCGTAGCTACGTGACCTTGAACGT
AACCGTCAT	Or-Kr-Ef_synthetic	AGCTACGATTAGCATCCCGTAGCTAGCGGCCCCACCCCGTAGCTACGTTCAAGGTCACGT
AACCTAATG	Ef-Kr-Sf-Or_synthetic	AGCTACGTTCAAGGTCACGTAGCTAGCGGCCCCACCCCGTAGCTACGCTCATTGTTTCGTAGCTACGATTAGCATCCCGT
AACCTCACC	Ef-Sr-Or-Kf_synthetic	AGCTACGTTCAAGGTCACGTAGCTACGAAACAATGAGCGTAGCTACGATTAGCATCCCGTAGCTACGGGGTGGGGCCGCT
AACCTGAAA	Basal
AACCTGGCG	Er-Sf-Of_synthetic	AGCTACGTGACCTTGAACGTAGCTACGCTCATTGTTTCGTAGCTACGGGATGCTAATCGT
AACCTGTAT	Of-Er-Kf-Sr_synthetic	AGCTACGGGATGCTAATCGTAGCTACGTGACCTTGAACGTAGCTACGGGGTGGGGCCGCTAGCTACGAAACAATGAGCGT
AACGAACGT	Sr-Er-Of-Kr_synthetic	AGCTACGAAACAATGAGCGTAGCTACGTGACCTTGAACGTAGCTACGGGATGCTAATCGTAGCTAGCGGCCCCACCCCGT
AACGAATCT	Kf-Sr-Er-Of_synthetic	AGCTACGGGGTGGGGCCGCTAGCTACGAAACAATGAGCGTAGCTACGTGACCTTGAACGTAGCTACGGGATGCTAATCGT
AACGACAGG	Kr-Of-Sr-Ef_synthetic	AGCTAGCGGCCCCACCCCGTAGCTACGGGATGCTAATCGTAGCTACGAAACAATGAGCGTAGCTACGTTCAAGGTCACGT
AACGACTAC	Ef-Kf-Of_synthetic	AGCTACGTTCAAGGTCACGTAGCTACGGGGTGGGGCCGCTAGCTACGGGATGCTAATCGT
AACGACTTA	Or-Kf-Er-Sf_synthetic	AGCTACGATTAGCATCCCGTAGCTACGGGGTGGGGCCGCTAGCTACGTGACCTTGAACGTAGCTACGCTCATTGTTTCGT
AACGAGAAA	Or-Sr-Kf-Er_synthetic	AGCTACGATTAGCATCCCGTAGCTACGAAACAATGAGCGTAGCTACGGGGTGGGGCCGCTAGCTACGTGACCTTGAACGT
AACGATCCA	Sf-Kf-Of-Er_synthetic	AGCTACGCTCATTGTTTCGTAGCTACGGGGTGGGGCCGCTAGCTACGGGATGCTAATCGTAGCTACGTGACCTTGAACGT
AACGATGCG	Sf-Kr-Or_synthetic	AGCTACGCTCATTGTTTCGTAGCTAGCGGCCCCACCCCGTAGCTACGATTAGCATCCCGT
AACGCACCG	Or-Sr-Ef_synthetic	AGCTACGATTAGCATCCCGTAGCTACGAAACAATGAGCGTAGCTACGTTCAAGGTCACGT
AACGCCGAG	Or-Er-Sr-Kr_synthetic	AGCTACGATTAGCATCCCGTAGCTACGTGACCTTGAACGTAGCTACGAAACAATGAGCGTAGCTAGCGGCCCCACCCCGT
AACGCCGTT	Er-Sf-Kf-Or_synthetic	AGCTACGTGACCTTGAACGTAGCTACGCTCATTGTTTCGTAGCTACGGGGTGGGGCCGCTAGCTACGATTAGCATCCCGT
AACGCGATA	Sf-Kr-Of_synthetic	AGCTACGCTCATTGTTTCGTAGCTAGCGGCCCCACCCCGTAGCTACGGGATGCTAATCGT
AACGCTGTG	Sf-Er-Or-Kf_synthetic	AGCTACGCTCATTGTTTCGTAGCTACGTGACCTTGAACGTAGCTACGATTAGCATCCCGTAGCTACGGGGTGGGGCCGCT
AACGGAAGG	Sf-Kr-Er-Or_synthetic	AGCTACGCTCATTGTTTCGTAGCTAGCGGCCCCACCCCGTAGCTACGTGACCTTGAACGTAGCTACGATTAGCATCCCGT
AACGGACAG	Er-Sr-Kf-Of_synthetic	AGCTACGTGACCTTGAACGTAGCTACGAAACAATGAGCGTAGCTACGGGGTGGGGCCGCTAGCTACGGGATGCTAATCGT
AACGGAGGC	Kf-Er-Of_synthetic	AGCTACGGGGTGGGGCCGCTAGCTACGTGACCTTGAACGTAGCTACGGGATGCTAATCGT
AACGGCGGT	Of-Kr-Er-Sf_synthetic	AGCTACGGGATGCTAATCGTAGCTAGCGGCCCCACCCCGTAGCTACGTGACCTTGAACGTAGCTACGCTCATTGTTTCGT
AACGGGCTA	Sr-Er-Of-Kr_synthetic	AGCTACGAAACAATGAGCGTAGCTACGTGACCTTGAACGTAGCTACGGGATGCTAATCGTAGCTAGCGGCCCCACCCCGT
AACGGGTAA	Kr-Sr-Of-Er_synthetic	AGCTAGCGGCCCCACCCCGTAGCTACGAAACAATGAGCGTAGCTACGGGATGCTAATCGTAGCTACGTGACCTTGAACGT
AACGGGTTG	Sr-Er-Of-Kr_synthetic	AGCTACGAAACAATGAGCGTAGCTACGTGACCTTGAACGTAGCTACGGGATGCTAATCGTAGCTAGCGGCCCCACCCCGT
AACGTAGCT	Of-Kr-Er-Sr_synthetic	AGCTACGGGATGCTAATCGTAGCTAGCGGCCCCACCCCGTAGCTACGTGACCTTGAACGTAGCTACGAAACAATGAGCGT
AACGTCCAA	Or-Kr_synthetic	AGCTACGATTAGCATCCCGTAGCTAGCGGCCCCACCCCGT
AACGTGTAG	Of-Kf-Sf_synthetic	AGCTACGGGATGCTAATCGTAGCTACGGGGTGGGGCCGCTAGCTACGCTCATTGTTTCGT
AACTAACTG	Kr-Of-Ef-Sf_synthetic	AGCTAGCGGCCCCACCCCGTAGCTACGGGATGCTAATCGTAGCTACGTTCAAGGTCACGTAGCTACGCTCATTGTTTCGT
AACTAATCC	Ef-Of-Sr-Kr_synthetic	AGCTACGTTCAAGGTCACGTAGCTACGGGATGCTAATCGTAGCTACGAAACAATGAGCGTAGCTAGCGGCCCCACCCCGT
AACTACTGA	Kf-Of-Ef-Sr_synthetic	AGCTACGGGGTGGGGCCGCTAGCTACGGGATGCTAATCGTAGCTACGTTCAAGGTCACGTAGCTACGAAACAATGAGCGT
AACTAGAAG	Er-Or-Sf-Kr_synthetic	AGCTACGTGACCTTGAACGTAGCTACGATTAGCATCCCGTAGCTACGCTCATTGTTTCGTAGCTAGCGGCCCCACCCCGT
AACTAGCGT	Kf-Sr-Er_synthetic	AGCTACGGGGTGGGGCCGCTAGCTACGAAACAATGAGCGTAGCTACGTGACCTTGAACGT
AACTAGGCA	Sf-Er-Of_synthetic	AGCTACGCTCATTGTTTCGTAGCTACGTGACCTTGAACGTAGCTACGGGATGCTAATCGT
AACTAGTGG	Or-Sr-Kf_synthetic	AGCTACGATTAGCATCCCGTAGCTACGAAACAATGAGCGTAGCTACGGGGTGGGGCCGCT
AACTCAACG	Sr-Er-Of_synthetic	AGCTACGAAACAATGAGCGTAGCTACGTGACCTTGAACGTAGCTACGGGATGCTAATCGT
AACTCAGAG	Sr-Er-Kr_synthetic	AGCTACGAAACAATGAGCGTAGCTACGTGACCTTGAACGTAGCTAGCGGCCCCACCCCGT
AACTCAGTT	Kf-Ef-Of-Sf_synthetic	AGCTACGGGGTGGGGCCGCTAGCTACGTTCAAGGTCACGTAGCTACGGGATGCTAATCGTAGCTACGCTCATTGTTTCGT
AACTCCACC	Ef-Of-Kr-Sr_synthetic	AGCTACGTTCAAGGTCACGTAGCTACGGGATGCTAATCGTAGCTAGCGGCCCCACCCCGTAGCTACGAAACAATGAGCGT
AACTCCATT	Kf-Ef-Or-Sf_synthetic	AGCTACGGGGTGGGGCCGCTAGCTACGTTCAAGGTCACGTAGCTACGATTAGCATCCCGTAGCTACGCTCATTGTTTCGT
AACTCGCAC	Sr-Kf-Er_synthetic	AGCTACGAAACAATGAGCGTAGCTACGGGGTGGGGCCGCTAGCTACGTGACCTTGAACGT
AACTCGCCT	Kr-Ef-Of-Sr_synthetic	AGCTAGCGGCCCCACCCCGTAGCTACGTTCAAGGTCACGTAGCTACGGGATGCTAATCGTAGCTACGAAACAATGAGCGT
AACTGTCAG	Kf-Or-Sr-Er_synthetic	AGCTACGGGGTGGGGCCGCTAGCTACGATTAGCATCCCGTAGCTACGAAACAATGAGCGTAGCTACGTGACCTTGAACGT
AACTGTGTC	Kf-Ef-Of_synthetic	AGCTACGGGGTGGGGCCGCTAGCTACGTTCAAGGTCACGTAGCTACGGGATGCTAATCGT
AACTTATGG	Er-Kr-Sf_synthetic	AGCTACGTGACCTTGAACGTAGCTAGCGGCCCCACCCCGTAGCTACGCTCATTGTTTCGT
AACTTCTCT	Er-Or-Kf-Sr_synthetic	AGCTACGTGACCTTGAACGTAGCTACGATTAGCATCCCGTAGCTACGGGGTGGGGCCGCTAGCTACGAAACAATGAGCGT
AACTTGGCC	Kr-Sf-Of-Er_synthetic	AGCTAGCGGCCCCACCCCGTAGCTACGCTCATTGTTTCGTAGCTACGGGATGCTAATCGTAGCTACGTGACCTTGAACGT
AACTTGGTT	Sf-Er-Kf-Of_synthetic	AGCTACGCTCATTGTTTCGTAGCTACGTGACCTTGAACGTAGCTACGGGGTGGGGCCGCTAGCTACGGGATGCTAATCGT
AACTTTAGG	Kr-Ef-Or-Sf_synthetic	AGCTAGCGGCCCCACCCCGTAGCTACGTTCAAGGTCACGTAGCTACGATTAGCATCCCGTAGCTACGCTCATTGTTTCGT
AAGAAGAAG	Or-Sr-Er_synthetic	AGCTACGATTAGCATCCCGTAGCTACGAAACAATGAGCGTAGCTACGTGACCTTGAACGT
AAGACCACG	Er-Sf-Of-Kf_synthetic	AGCTACGTGACCTTGAACGTAGCTACGCTCATTGTTTCGTAGCTACGGGATGCTAATCGTAGCTACGGGGTGGGGCCGCT
AAGACCCAG	Er-Or-Sf-Kr_synthetic	AGCTACGTGACCTTGAACGTAGCTACGATTAGCATCCCGTAGCTACGCTCATTGTTTCGTAGCTAGCGGCCCCACCCCGT
AAGACTCTG	Er-Sf-Kf_synthetic	AGCTACGTGACCTTGAACGTAGCTACGCTCATTGTTTCGTAGCTACGGGGTGGGGCCGCT
AAGAGAGAG	Kf-Sr-Er_synthetic	AGCTACGGGGTGGGGCCGCTAGCTACGAAACAATGAGCGTAGCTACGTGACCTTGAACGT
AAGAGAGTA	Or-Er_synthetic	AGCTACGATTAGCATCCCGTAGCTACGTGACCTTGAACGT
AAGAGCCCT	Kf-Sr_synthetic	AGCTACGGGGTGGGGCCGCTAGCTACGAAACAATGAGCGT
AAGAGGACG	Sf-Ef-Or-Kr_synthetic	AGCTACGCTCATTGTTTCGTAGCTACGTTCAAGGTCACGTAGCTACGATTAGCATCCCGTAGCTAGCGGCCCCACCCCGT
AAGAGGCAG	Ef-Kf-Sr-Or_synthetic	AGCTACGTTCAAGGTCACGTAGCTACGGGGTGGGGCCGCTAGCTACGAAACAATGAGCGTAGCTACGATTAGCATCCCGT
AAGAGTAGA	Or-Er-Sf-Kr_synthetic	AGCTACGATTAGCATCCCGTAGCTACGTGACCTTGAACGTAGCTACGCTCATTGTTTCGTAGCTAGCGGCCCCACCCCGT
AAGAGTTCT	Of-Kf-Sf_synthetic	AGCTACGGGATGCTAATCGTAGCTACGGGGTGGGGCCGCTAGCTACGCTCATTGTTTCGT
AAGATGAGT	Or-Ef-Sf-Kf_synthetic	AGCTACGATTAGCATCCCGTAGCTACGTTCAAGGTCACGTAGCTACGCTCATTGTTTCGTAGCTACGGGGTGGGGCCGCT
AAGATTGTG	Of-Ef-Kf-Sf_synthetic	AGCTACGGGATGCTAATCGTAGCTACGTTCAAGGTCACGTAGCTACGGGGTGGGGCCGCTAGCTACGCTCATTGTTTCGT
AAGCACCGC	Of-Kr-Sr-Er_synthetic	AGCTACGGGATGCTAATCGTAGCTAGCGGCCCCACCCCGTAGCTACGAAACAATGAGCGTAGCTACGTGACCTTGAACGT
AAGCACGGA	Kr-Ef-Sr-Or_synthetic	AGCTAGCGGCCCCACCCCGTAGCTACGTTCAAGGTCACGTAGCTACGAAACAATGAGCGTAGCTACGATTAGCATCCCGT
AAGCACTGT	Of-Sr-Kr_synthetic	AGCTACGGGATGCTAATCGTAGCTACGAAACAATGAGCGTAGCTAGCGGCCCCACCCCGT
AAGCATGAG	Sr-Or-Kf-Ef_synthetic	AGCTACGAAACAATGAGCGTAGCTACGATTAGCATCCCGTAGCTACGGGGTGGGGCCGCTAGCTACGTTCAAGGTCACGT
AAGCATTGG	Ef-Or-Kf_synthetic	AGCTACGTTCAAGGTCACGTAGCTACGATTAGCATCCCGTAGCTACGGGGTGGGGCCGCT
AAGCCATTA	Ef-Or-Kr-Sr_synthetic	AGCTACGTTCAAGGTCACGTAGCTACGATTAGCATCCCGTAGCTAGCGGCCCCACCCCGTAGCTACGAAACAATGAGCGT
AAGCCCTCT	Of-Kf-Sf-Ef_synthetic	AGCTACGGGATGCTAATCGTAGCTACGGGGTGGGGCCGCTAGCTACGCTCATTGTTTCGTAGCTACGTTCAAGGTCACGT
AAGCCTGAT	Sr-Of-Kr-Ef_synthetic	AGCTACGAAACAATGAGCGTAGCTACGGGATGCTAATCGTAGCTAGCGGCCCCACCCCGTAGCTACGTTCAAGGTCACGT
AAGCCTTAA	Of-Kr-Ef-Sf_synthetic	AGCTACGGGATGCTAATCGTAGCTAGCGGCCCCACCCCGTAGCTACGTTCAAGGTCACGTAGCTACGCTCATTGTTTCGT
AAGCGAGGG	Ef-Or-Sf-Kr_synthetic	AGCTACGTTCAAGGTCACGTAGCTACGATTAGCATCCCGTAGCTACGCTCATTGTTTCGTAGCTAGCGGCCCCACCCCGT
AAGCGCCAG	Kr-Ef-Of_synthetic	AGCTAGCGGCCCCACCCCGTAGCTACGTTCAAGGTCACGTAGCTACGGGATGCTAATCGT
AAGCGCCTC	Or-Ef-Kr-Sf_synthetic	AGCTACGATTAGCATCCCGTAGCTACGTTCAAGGTCACGTAGCTAGCGGCCCCACCCCGTAGCTACGCTCATTGTTTCGT
AAGCGGCTA	Sf-Or-Ef-Kf_synthetic	AGCTACGCTCATTGTTTCGTAGCTACGATTAGCATCCCGTAGCTACGTTCAAGGTCACGTAGCTACGGGGTGGGGCCGCT
AAGCGTTAT	Sf-Er-Kr-Of_synthetic	AGCTACGCTCATTGTTTCGTAGCTACGTGACCTTGAACGTAGCTAGCGGCCCCACCCCGTAGCTACGGGATGCTAATCGT
AAGCTAGTG	Er-Sf-Or_synthetic	AGCTACGTGACCTTGAACGTAGCTACGCTCATTGTTTCGTAGCTACGATTAGCATCCCGT
AAGCTCATG	Er-Of-Sf-Kf_synthetic	AGCTACGTGACCTTGAACGTAGCTACGGGATGCTAATCGTAGCTACGCTCATTGTTTCGTAGCTACGGGGTGGGGCCGCT
AAGCTCCCA	Ef-Sf-Kf-Or_synthetic	AGCTACGTTCAAGGTCACGTAGCTACGCTCATTGTTTCGTAGCTACGGGGTGGGGCCGCTAGCTACGATTAGCATCCCGT
AAGCTCCTT	Or-Ef-Sf_synthetic	AGCTACGATTAGCATCCCGTAGCTACGTTCAAGGTCACGTAGCTACGCTCATTGTTTCGT
AAGCTGTTA	Kf-Or-Sr_synthetic	AGCTACGGGGTGGGGCCGCTAGCTACGATTAGCATCCCGTAGCTACGAAACAATGAGCGT
AAGGAAGGA	Sr-Ef-Kf-Of_synthetic	AGCTACGAAACAATGAGCGTAGCTACGTTCAAGGTCACGTAGCTACGGGGTGGGGCCGCTAGCTACGGGATGCTAATCGT
AAGGAAGTC	Sr-Ef-Kf-Of_synthetic	AGCTACGAAACAATGAGCGTAGCTACGTTCAAGGTCACGTAGCTACGGGGTGGGGCCGCTAGCTACGGGATGCTAATCGT
AAGGACCGG	Kr-Sr_synthetic	AGCTAGCGGCCCCACCCCGTAGCTACGAAACAATGAGCGT
AAGGACGGT	Er-Sr-Kf_synthetic	AGCTACGTGACCTTGAACGTAGCTACGAAACAATGAGCGTAGCTACGGGGTGGGGCCGCT
AAGGACTCA	Kr-Sf-Ef_synthetic	AGCTAGCGGCCCCACCCCGTAGCTACGCTCATTGTTTCGTAGCTACGTTCAAGGTCACGT
AAGGAGACA	Er-Sr-Kr_synthetic	AGCTACGTGACCTTGAACGTAGCTACGAAACAATGAGCGTAGCTAGCGGCCCCACCCCGT
AAGGAGCTG	Sr-Of-Kr_synthetic	AGCTACGAAACAATGAGCGTAGCTACGGGATGCTAATCGTAGCTAGCGGCCCCACCCCGT
AAGGAGGTA	Er-Or-Sf_synthetic	AGCTACGTGACCTTGAACGTAGCTACGATTAGCATCCCGTAGCTACGCTCATTGTTTCGT
AAGGAGTTC	Er-Or-Sf_synthetic	AGCTACGTGACCTTGAACGTAGCTACGATTAGCATCCCGTAGCTACGCTCATTGTTTCGT
AAGGCAAGA	Of-Sf_synthetic	AGCTACGGGATGCTAATCGTAGCTACGCTCATTGTTTCGT
AAGGCCGAT	Sf-Kr-Of_synthetic	AGCTACGCTCATTGTTTCGTAGCTAGCGGCCCCACCCCGTAGCTACGGGATGCTAATCGT
AAGGCGAAT	Kf-Of-Er-Sf_synthetic	AGCTACGGGGTGGGGCCGCTAGCTACGGGATGCTAATCGTAGCTACGTGACCTTGAACGTAGCTACGCTCATTGTTTCGT
AAGGCTGGA	Sf-Kf-Of-Er_synthetic	AGCTACGCTCATTGTTTCGTAGCTACGGGGTGGGGCCGCTAGCTACGGGATGCTAATCGTAGCTACGTGACCTTGAACGT
AAGGGACAC	Kr-Of-Sf-Ef_synthetic	AGCTAGCGGCCCCACCCCGTAGCTACGGGATGCTAATCGTAGCTACGCTCATTGTTTCGTAGCTACGTTCAAGGTCACGT
AAGGGCAAG	Or-Sf-Kr-Er_synthetic	AGCTACGATTAGCATCCCGTAGCTACGCTCATTGTTTCGTAGCTAGCGGCCCCACCCCGTAGCTACGTGACCTTGAACGT
AAGGGTAAT	Of-Sf-Ef-Kf_synthetic	AGCTACGGGATGCTAATCGTAGCTACGCTCATTGTTTCGTAGCTACGTTCAAGGTCACGTAGCTACGGGGTGGGGCCGCT
AAGGGTCGT	Sf-Kf-Or_synthetic	AGCTACGCTCATTGTTTCGTAGCTACGGGGTGGGGCCGCTAGCTACGATTAGCATCCCGT
AAGGGTGGG	Sf-Kf-Ef-Of_synthetic	AGCTACGCTCATTGTTTCGTAGCTACGGGGTGGGGCCGCTAGCTACGTTCAAGGTCACGTAGCTACGGGATGCTAATCGT
AAGGTATAC	SrKfSrKr_CMF-Scalar	AGCTACGAAACAATGAGCGTAGCTACGGGGCGGGGCCGCTAGCTACGAAACAATGAGCGTAGCTAGCGGCCCCGCCCCGT
AAGGTCAGC	Kf-Er_synthetic	AGCTACGGGGTGGGGCCGCTAGCTACGTGACCTTGAACGT
AAGGTCGCT	Kr-Sf_synthetic	AGCTAGCGGCCCCACCCCGTAGCTACGCTCATTGTTTCGT
AAGGTCGTA	Or-Kf-Sf-Er_synthetic	AGCTACGATTAGCATCCCGTAGCTACGGGGTGGGGCCGCTAGCTACGCTCATTGTTTCGTAGCTACGTGACCTTGAACGT
AAGGTGAAA	Or-Ef-Kf-Sf_synthetic	AGCTACGATTAGCATCCCGTAGCTACGTTCAAGGTCACGTAGCTACGGGGTGGGGCCGCTAGCTACGCTCATTGTTTCGT
AAGGTGGAT	Kf-Ef-Or-Sr_synthetic	AGCTACGGGGTGGGGCCGCTAGCTACGTTCAAGGTCACGTAGCTACGATTAGCATCCCGTAGCTACGAAACAATGAGCGT
AAGGTGTGG	Sr-Of-Kf_synthetic	AGCTACGAAACAATGAGCGTAGCTACGGGATGCTAATCGTAGCTACGGGGTGGGGCCGCT
AAGGTTAGA	Kr-Sr-Ef-Or_synthetic	AGCTAGCGGCCCCACCCCGTAGCTACGAAACAATGAGCGTAGCTACGTTCAAGGTCACGTAGCTACGATTAGCATCCCGT
AAGGTTCTC	Of-Sf-Er-Kf_synthetic	AGCTACGGGATGCTAATCGTAGCTACGCTCATTGTTTCGTAGCTACGTGACCTTGAACGTAGCTACGGGGTGGGGCCGCT
AAGGTTTGT	Kr-Er-Or-Sr_synthetic	AGCTAGCGGCCCCACCCCGTAGCTACGTGACCTTGAACGTAGCTACGATTAGCATCCCGTAGCTACGAAACAATGAGCGT
AAGTAATGC	Er-Of-Kr-Sr_synthetic	AGCTACGTGACCTTGAACGTAGCTACGGGATGCTAATCGTAGCTAGCGGCCCCACCCCGTAGCTACGAAACAATGAGCGT
AAGTAGTCT	Kf-Sf-Of-Er_synthetic	AGCTACGGGGTGGGGCCGCTAGCTACGCTCATTGTTTCGTAGCTACGGGATGCTAATCGTAGCTACGTGACCTTGAACGT
AAGTATCGT	Sr-Of-Kf_synthetic	AGCTACGAAACAATGAGCGTAGCTACGGGATGCTAATCGTAGCTACGGGGTGGGGCCGCT
AAGTATGGG	Kr-Er-Sf-Or_synthetic	AGCTAGCGGCCCCACCCCGTAGCTACGTGACCTTGAACGTAGCTACGCTCATTGTTTCGTAGCTACGATTAGCATCCCGT
AAGTCACAA	Kr-Ef-Or-Sr_synthetic	AGCTAGCGGCCCCACCCCGTAGCTACGTTCAAGGTCACGTAGCTACGATTAGCATCCCGTAGCTACGAAACAATGAGCGT
AAGTCACTG	Sf-Of-Ef-Kr_synthetic	AGCTACGCTCATTGTTTCGTAGCTACGGGATGCTAATCGTAGCTACGTTCAAGGTCACGTAGCTAGCGGCCCCACCCCGT
AAGTCCAGT	Ef-Sf-Kf_synthetic	AGCTACGTTCAAGGTCACGTAGCTACGCTCATTGTTTCGTAGCTACGGGGTGGGGCCGCT
AAGTCCTGC	Or-Kr-Sr-Ef_synthetic	AGCTACGATTAGCATCCCGTAGCTAGCGGCCCCACCCCGTAGCTACGAAACAATGAGCGTAGCTACGTTCAAGGTCACGT
AAGTCGGTT	Or-Sr-Kf-Ef_synthetic	AGCTACGATTAGCATCCCGTAGCTACGAAACAATGAGCGTAGCTACGGGGTGGGGCCGCTAGCTACGTTCAAGGTCACGT
AAGTGAACG	Sf-Kf-Of_synthetic	AGCTACGCTCATTGTTTCGTAGCTACGGGGTGGGGCCGCTAGCTACGGGATGCTAATCGT
AAGTGACGG	Kr-Sf-Ef-Or_synthetic	AGCTAGCGGCCCCACCCCGTAGCTACGCTCATTGTTTCGTAGCTACGTTCAAGGTCACGTAGCTACGATTAGCATCCCGT
AAGTGAGTG	Kf-Ef-Of-Sf_synthetic	AGCTACGGGGTGGGGCCGCTAGCTACGTTCAAGGTCACGTAGCTACGGGATGCTAATCGTAGCTACGCTCATTGTTTCGT
AAGTGATCA	Kr-Ef_synthetic	AGCTAGCGGCCCCACCCCGTAGCTACGTTCAAGGTCACGT
AAGTGCACT	Or-Kr-Er-Sr_synthetic	AGCTACGATTAGCATCCCGTAGCTAGCGGCCCCACCCCGTAGCTACGTGACCTTGAACGTAGCTACGAAACAATGAGCGT
AAGTGCTAA	Or-Kr-Er-Sr_synthetic	AGCTACGATTAGCATCCCGTAGCTAGCGGCCCCACCCCGTAGCTACGTGACCTTGAACGTAGCTACGAAACAATGAGCGT
AAGTGCTTC	Or-Sf-Kr_synthetic	AGCTACGATTAGCATCCCGTAGCTACGCTCATTGTTTCGTAGCTAGCGGCCCCACCCCGT
AAGTGGATG	Er-Or-Kr-Sr_synthetic	AGCTACGTGACCTTGAACGTAGCTACGATTAGCATCCCGTAGCTAGCGGCCCCACCCCGTAGCTACGAAACAATGAGCGT
AAGTGGCTT	Or-Ef-Sf-Kf_synthetic	AGCTACGATTAGCATCCCGTAGCTACGTTCAAGGTCACGTAGCTACGCTCATTGTTTCGTAGCTACGGGGTGGGGCCGCT
AAGTGGGCG	Er-Kr-Of-Sr_synthetic	AGCTACGTGACCTTGAACGTAGCTAGCGGCCCCACCCCGTAGCTACGGGATGCTAATCGTAGCTACGAAACAATGAGCGT
AAGTGGTGC	Kf-Sr-Of-Ef_synthetic	AGCTACGGGGTGGGGCCGCTAGCTACGAAACAATGAGCGTAGCTACGGGATGCTAATCGTAGCTACGTTCAAGGTCACGT
AAGTGTAAG	Kr-Ef-Or-Sr_synthetic	AGCTAGCGGCCCCACCCCGTAGCTACGTTCAAGGTCACGTAGCTACGATTAGCATCCCGTAGCTACGAAACAATGAGCGT
AAGTTAGCT	Kf-Er-Sf_synthetic	AGCTACGGGGTGGGGCCGCTAGCTACGTGACCTTGAACGTAGCTACGCTCATTGTTTCGT
AAGTTGACT	Kf-Ef-Sf-Of_synthetic	AGCTACGGGGTGGGGCCGCTAGCTACGTTCAAGGTCACGTAGCTACGCTCATTGTTTCGTAGCTACGGGATGCTAATCGT
AAGTTGCAG	Kr-Er-Sf_synthetic	AGCTAGCGGCCCCACCCCGTAGCTACGTGACCTTGAACGTAGCTACGCTCATTGTTTCGT
AAGTTGGGA	Sr-Kr-Of-Er_synthetic	AGCTACGAAACAATGAGCGTAGCTAGCGGCCCCACCCCGTAGCTACGGGATGCTAATCGTAGCTACGTGACCTTGAACGT
AATACATCG	Er-Kf-Or_synthetic	AGCTACGTGACCTTGAACGTAGCTACGGGGTGGGGCCGCTAGCTACGATTAGCATCCCGT
AATACCCTG	Of-Ef_synthetic	AGCTACGGGATGCTAATCGTAGCTACGTTCAAGGTCACGT
AATACCGTA	Er-Of-Kr-Sr_synthetic	AGCTACGTGACCTTGAACGTAGCTACGGGATGCTAATCGTAGCTAGCGGCCCCACCCCGTAGCTACGAAACAATGAGCGT
AATACGACC	Sf-Ef_synthetic	AGCTACGCTCATTGTTTCGTAGCTACGTTCAAGGTCACGT
AATACGTGT	Sf-Of-Er-Kf_synthetic	AGCTACGCTCATTGTTTCGTAGCTACGGGATGCTAATCGTAGCTACGTGACCTTGAACGTAGCTACGGGGTGGGGCCGCT
AATAGAGCT	Kf-Er-Sr-Or_synthetic	AGCTACGGGGTGGGGCCGCTAGCTACGTGACCTTGAACGTAGCTACGAAACAATGAGCGTAGCTACGATTAGCATCCCGT
AATAGGGAA	Of-Sf-Kf-Er_synthetic	AGCTACGGGATGCTAATCGTAGCTACGCTCATTGTTTCGTAGCTACGGGGTGGGGCCGCTAGCTACGTGACCTTGAACGT
AATAGGTGG	Kf-Er-Of_synthetic	AGCTACGGGGTGGGGCCGCTAGCTACGTGACCTTGAACGTAGCTACGGGATGCTAATCGT
AATAGTGGA	Or-Kr-Sr-Er_synthetic	AGCTACGATTAGCATCCCGTAGCTAGCGGCCCCACCCCGTAGCTACGAAACAATGAGCGTAGCTACGTGACCTTGAACGT
AATATCCTC	Kf-Er-Or-Sr_synthetic	AGCTACGGGGTGGGGCCGCTAGCTACGTGACCTTGAACGTAGCTACGATTAGCATCCCGTAGCTACGAAACAATGAGCGT
AATATGCGG	Ef-Of-Kr-Sr_synthetic	AGCTACGTTCAAGGTCACGTAGCTACGGGATGCTAATCGTAGCTAGCGGCCCCACCCCGTAGCTACGAAACAATGAGCGT
AATATGGCT	Sr-Of-Kr-Ef_synthetic	AGCTACGAAACAATGAGCGTAGCTACGGGATGCTAATCGTAGCTAGCGGCCCCACCCCGTAGCTACGTTCAAGGTCACGT
AATCAATCG	Or-Er-Sf-Kf_synthetic	AGCTACGATTAGCATCCCGTAGCTACGTGACCTTGAACGTAGCTACGCTCATTGTTTCGTAGCTACGGGGTGGGGCCGCT
AATCAGACC	Kr-Sr-Of-Ef_synthetic	AGCTAGCGGCCCCACCCCGTAGCTACGAAACAATGAGCGTAGCTACGGGATGCTAATCGTAGCTACGTTCAAGGTCACGT
AATCAGCGG	Or-Er_synthetic	AGCTACGATTAGCATCCCGTAGCTACGTGACCTTGAACGT
AATCAGGGA	Of-Ef-Kf_synthetic	AGCTACGGGATGCTAATCGTAGCTACGTTCAAGGTCACGTAGCTACGGGGTGGGGCCGCT
AATCAGTGC	Of-Kf-Ef-Sr_synthetic	AGCTACGGGATGCTAATCGTAGCTACGGGGTGGGGCCGCTAGCTACGTTCAAGGTCACGTAGCTACGAAACAATGAGCGT
AATCCAAGC	Kr-Sr-Ef_synthetic	AGCTAGCGGCCCCACCCCGTAGCTACGAAACAATGAGCGTAGCTACGTTCAAGGTCACGT
AATCCACGT	Kf-Sr-Of-Er_synthetic	AGCTACGGGGTGGGGCCGCTAGCTACGAAACAATGAGCGTAGCTACGGGATGCTAATCGTAGCTACGTGACCTTGAACGT
AATCCAGGG	Basal
AATCCGAGG	Kf-Or-Sr_synthetic	AGCTACGGGGTGGGGCCGCTAGCTACGATTAGCATCCCGTAGCTACGAAACAATGAGCGT
AATCGAAGG	Kr-Er-Sr_synthetic	AGCTAGCGGCCCCACCCCGTAGCTACGTGACCTTGAACGTAGCTACGAAACAATGAGCGT
AATCGATGT	Sr-Ef-Kf-Or_synthetic	AGCTACGAAACAATGAGCGTAGCTACGTTCAAGGTCACGTAGCTACGGGGTGGGGCCGCTAGCTACGATTAGCATCCCGT
AATCGCAGC	Er-Sr-Kf_synthetic	AGCTACGTGACCTTGAACGTAGCTACGAAACAATGAGCGTAGCTACGGGGTGGGGCCGCT
AATCGCCAA	KfSrOfKr_CMF-Scalar	AGCTACGGGGCGGGGCCGCTAGCTACGAAACAATGAGCGTAGCTACGGGATGCTAATCGTAGCTAGCGGCCCCGCCCCGT
AATCGCCTT	Kf-Sf-Or-Ef_synthetic	AGCTACGGGGTGGGGCCGCTAGCTACGCTCATTGTTTCGTAGCTACGATTAGCATCCCGTAGCTACGTTCAAGGTCACGT
AATCGGCCG	Kf-Or-Ef_synthetic	AGCTACGGGGTGGGGCCGCTAGCTACGATTAGCATCCCGTAGCTACGTTCAAGGTCACGT
AATCGGTCT	Kf-Sf-Er-Or_synthetic	AGCTACGGGGTGGGGCCGCTAGCTACGCTCATTGTTTCGTAGCTACGTGACCTTGAACGTAGCTACGATTAGCATCCCGT
AATCGTCAG	Er-Of-Sr_synthetic	AGCTACGTGACCTTGAACGTAGCTACGGGATGCTAATCGTAGCTACGAAACAATGAGCGT
AATCGTTAC	Of-Kr-Sr-Ef_synthetic	AGCTACGGGATGCTAATCGTAGCTAGCGGCCCCACCCCGTAGCTACGAAACAATGAGCGTAGCTACGTTCAAGGTCACGT
AATCTCGAA	Sr-Or-Kf_synthetic	AGCTACGAAACAATGAGCGTAGCTACGATTAGCATCCCGTAGCTACGGGGTGGGGCCGCT
AATCTGGGC	Or-Sf-Er-Kf_synthetic	AGCTACGATTAGCATCCCGTAGCTACGCTCATTGTTTCGTAGCTACGTGACCTTGAACGTAGCTACGGGGTGGGGCCGCT
AATCTTTCG	Er-Sr-Of_synthetic	AGCTACGTGACCTTGAACGTAGCTACGAAACAATGAGCGTAGCTACGGGATGCTAATCGT
AATGACCGA	Basal
AATGAGAAC	Kf-Sr-Or_synthetic	AGCTACGGGGTGGGGCCGCTAGCTACGAAACAATGAGCGTAGCTACGATTAGCATCCCGT
AATGCACAT	Ef-Sf_synthetic	AGCTACGTTCAAGGTCACGTAGCTACGCTCATTGTTTCGT
AATGCACCC	Kr-Er-Or-Sf_synthetic	AGCTAGCGGCCCCACCCCGTAGCTACGTGACCTTGAACGTAGCTACGATTAGCATCCCGTAGCTACGCTCATTGTTTCGT
AATGCCGCA	Sr-Of-Kf-Ef_synthetic	AGCTACGAAACAATGAGCGTAGCTACGGGATGCTAATCGTAGCTACGGGGTGGGGCCGCTAGCTACGTTCAAGGTCACGT
AATGCCGTG	Er-Of-Sr-Kf_synthetic	AGCTACGTGACCTTGAACGTAGCTACGGGATGCTAATCGTAGCTACGAAACAATGAGCGTAGCTACGGGGTGGGGCCGCT
AATGCGACG	Ef-Of-Sf-Kr_synthetic	AGCTACGTTCAAGGTCACGTAGCTACGGGATGCTAATCGTAGCTACGCTCATTGTTTCGTAGCTAGCGGCCCCACCCCGT
AATGCGATC	Kf-Er-Or-Sr_synthetic	AGCTACGGGGTGGGGCCGCTAGCTACGTGACCTTGAACGTAGCTACGATTAGCATCCCGTAGCTACGAAACAATGAGCGT
AATGCGGAG	Kf-Sf-Of-Er_synthetic	AGCTACGGGGTGGGGCCGCTAGCTACGCTCATTGTTTCGTAGCTACGGGATGCTAATCGTAGCTACGTGACCTTGAACGT
AATGCGGTT	EfOrOf_CMF-Scalar	AGCTACGTTCAAGGTCACGTAGCTACGATTAGCATCCCGTAGCTACGGGATGCTAATCGT
AATGCTGCG	Sr-Or-Er_synthetic	AGCTACGAAACAATGAGCGTAGCTACGATTAGCATCCCGTAGCTACGTGACCTTGAACGT
AATGGAACC	Ef-Kr-Or-Sf_synthetic	AGCTACGTTCAAGGTCACGTAGCTAGCGGCCCCACCCCGTAGCTACGATTAGCATCCCGTAGCTACGCTCATTGTTTCGT
AATGGAATG	Sf-Of-Kr-Ef_synthetic	AGCTACGCTCATTGTTTCGTAGCTACGGGATGCTAATCGTAGCTAGCGGCCCCACCCCGTAGCTACGTTCAAGGTCACGT
AATGGCACG	Or-Kf-Er-Sf_synthetic	AGCTACGATTAGCATCCCGTAGCTACGGGGTGGGGCCGCTAGCTACGTGACCTTGAACGTAGCTACGCTCATTGTTTCGT
AATGGCATA	Sr-Of-Kr_synthetic	AGCTACGAAACAATGAGCGTAGCTACGGGATGCTAATCGTAGCTAGCGGCCCCACCCCGT
AATGGCGAG	Kr-Sf-Or-Ef_synthetic	AGCTAGCGGCCCCACCCCGTAGCTACGCTCATTGTTTCGTAGCTACGATTAGCATCCCGTAGCTACGTTCAAGGTCACGT
AATGGCGTC	Or-Er-Kr_synthetic	AGCTACGATTAGCATCCCGTAGCTACGTGACCTTGAACGTAGCTAGCGGCCCCACCCCGT
AATGGTCGC	Or-Kr-Ef-Sr_synthetic	AGCTACGATTAGCATCCCGTAGCTAGCGGCCCCACCCCGTAGCTACGTTCAAGGTCACGTAGCTACGAAACAATGAGCGT
AATGTCGCG	Or-Sr-Ef-Kr_synthetic	AGCTACGATTAGCATCCCGTAGCTACGAAACAATGAGCGTAGCTACGTTCAAGGTCACGTAGCTAGCGGCCCCACCCCGT
AATTATGCC	Ef-Of-Sf-Kf_synthetic	AGCTACGTTCAAGGTCACGTAGCTACGGGATGCTAATCGTAGCTACGCTCATTGTTTCGTAGCTACGGGGTGGGGCCGCT
AATTCCACG	Kf-Sr_synthetic	AGCTACGGGGTGGGGCCGCTAGCTACGAAACAATGAGCGT
AATTCCCAT	Kf-Sf-Er-Of_synthetic	AGCTACGGGGTGGGGCCGCTAGCTACGCTCATTGTTTCGTAGCTACGTGACCTTGAACGTAGCTACGGGATGCTAATCGT
AATTCCTGG	Kr-Of-Sf-Er_synthetic	AGCTAGCGGCCCCACCCCGTAGCTACGGGATGCTAATCGTAGCTACGCTCATTGTTTCGTAGCTACGTGACCTTGAACGT
AATTCGCCG	Ef-Sf-Kr_synthetic	AGCTACGTTCAAGGTCACGTAGCTACGCTCATTGTTTCGTAGCTAGCGGCCCCACCCCGT
AATTCGTAG	Ef-Kf_synthetic	AGCTACGTTCAAGGTCACGTAGCTACGGGGTGGGGCCGCT
AATTGCGGT	Sf-Or-Er-Kr_synthetic	AGCTACGCTCATTGTTTCGTAGCTACGATTAGCATCCCGTAGCTACGTGACCTTGAACGTAGCTAGCGGCCCCACCCCGT
AATTGGCTC	Kr-Or-Ef_synthetic	AGCTAGCGGCCCCACCCCGTAGCTACGATTAGCATCCCGTAGCTACGTTCAAGGTCACGT
AATTGGTTG	Ef-Kr-Of-Sf_synthetic	AGCTACGTTCAAGGTCACGTAGCTAGCGGCCCCACCCCGTAGCTACGGGATGCTAATCGTAGCTACGCTCATTGTTTCGT
AATTTCAGG	Kf-Or-Ef_synthetic	AGCTACGGGGTGGGGCCGCTAGCTACGATTAGCATCCCGTAGCTACGTTCAAGGTCACGT
AATTTCCAG	Kr-Er_synthetic	AGCTAGCGGCCCCACCCCGTAGCTACGTGACCTTGAACGT
ACAAAGAGC	Sf-Ef_synthetic	AGCTACGCTCATTGTTTCGTAGCTACGTTCAAGGTCACGT
ACAAAGCCC	Sf-Kf-Of-Ef_synthetic	AGCTACGCTCATTGTTTCGTAGCTACGGGGTGGGGCCGCTAGCTACGGGATGCTAATCGTAGCTACGTTCAAGGTCACGT
ACAAAGTTC	Or-Sf-Kr_synthetic	AGCTACGATTAGCATCCCGTAGCTACGCTCATTGTTTCGTAGCTAGCGGCCCCACCCCGT
ACAAATGTC	Kr-Or-Er-Sr_synthetic	AGCTAGCGGCCCCACCCCGTAGCTACGATTAGCATCCCGTAGCTACGTGACCTTGAACGTAGCTACGAAACAATGAGCGT
ACAACATGT	Kr-Of-Sf_synthetic	AGCTAGCGGCCCCACCCCGTAGCTACGGGATGCTAATCGTAGCTACGCTCATTGTTTCGT
ACAACCCGT	Of-Er-Sr-Kf_synthetic	AGCTACGGGATGCTAATCGTAGCTACGTGACCTTGAACGTAGCTACGAAACAATGAGCGTAGCTACGGGGTGGGGCCGCT
ACAACGCAA	Of-Sr-Kf-Ef_synthetic	AGCTACGGGATGCTAATCGTAGCTACGAAACAATGAGCGTAGCTACGGGGTGGGGCCGCTAGCTACGTTCAAGGTCACGT
ACAACTGAA	Or-Sf-Ef-Kf_synthetic	AGCTACGATTAGCATCCCGTAGCTACGCTCATTGTTTCGTAGCTACGTTCAAGGTCACGTAGCTACGGGGTGGGGCCGCT
ACAAGAGTG	Of-Er-Sf-Kr_synthetic	AGCTACGGGATGCTAATCGTAGCTACGTGACCTTGAACGTAGCTACGCTCATTGTTTCGTAGCTAGCGGCCCCACCCCGT
ACAAGATAG	Sf-Kf-Or-Ef_synthetic	AGCTACGCTCATTGTTTCGTAGCTACGGGGTGGGGCCGCTAGCTACGATTAGCATCCCGTAGCTACGTTCAAGGTCACGT
ACAAGCACA	SrKf_CMF-Scalar	AGCTACGAAACAATGAGCGTAGCTACGGGGCGGGGCCGCT
ACAAGCCAA	Kr-Ef-Sf-Or_synthetic	AGCTAGCGGCCCCACCCCGTAGCTACGTTCAAGGTCACGTAGCTACGCTCATTGTTTCGTAGCTACGATTAGCATCCCGT
ACAAGGCGT	Of-Sf-Er-Kf_synthetic	AGCTACGGGATGCTAATCGTAGCTACGCTCATTGTTTCGTAGCTACGTGACCTTGAACGTAGCTACGGGGTGGGGCCGCT
ACAAGTCTC	Sf-Kf-Er-Of_synthetic	AGCTACGCTCATTGTTTCGTAGCTACGGGGTGGGGCCGCTAGCTACGTGACCTTGAACGTAGCTACGGGATGCTAATCGT
ACAAGTGGG	Sr-Ef-Of-Kr_synthetic	AGCTACGAAACAATGAGCGTAGCTACGTTCAAGGTCACGTAGCTACGGGATGCTAATCGTAGCTAGCGGCCCCACCCCGT
ACAATAGTC	Ef-Kf-Sf-Or_synthetic	AGCTACGTTCAAGGTCACGTAGCTACGGGGTGGGGCCGCTAGCTACGCTCATTGTTTCGTAGCTACGATTAGCATCCCGT
ACAATGCAT	Or-Kf-Sr_synthetic	AGCTACGATTAGCATCCCGTAGCTACGGGGTGGGGCCGCTAGCTACGAAACAATGAGCGT
ACACAACGT	Basal
ACACACAGG	Ef-Or-Kf-Sf_synthetic	AGCTACGTTCAAGGTCACGTAGCTACGATTAGCATCCCGTAGCTACGGGGTGGGGCCGCTAGCTACGCTCATTGTTTCGT
ACACAGACG	Ef-Or-Sf-Kr_synthetic	AGCTACGTTCAAGGTCACGTAGCTACGATTAGCATCCCGTAGCTACGCTCATTGTTTCGTAGCTAGCGGCCCCACCCCGT
ACACAGCTA	Sf-Er-Or_synthetic	AGCTACGCTCATTGTTTCGTAGCTACGTGACCTTGAACGTAGCTACGATTAGCATCCCGT
ACACAGGAC	Or-Kr-Er-Sr_synthetic	AGCTACGATTAGCATCCCGTAGCTAGCGGCCCCACCCCGTAGCTACGTGACCTTGAACGTAGCTACGAAACAATGAGCGT
ACACATCGG	Kr-Sf-Er-Or_synthetic	AGCTAGCGGCCCCACCCCGTAGCTACGCTCATTGTTTCGTAGCTACGTGACCTTGAACGTAGCTACGATTAGCATCCCGT
ACACATGCG	Basal
ACACCAAAT	Er-Sf-Or_synthetic	AGCTACGTGACCTTGAACGTAGCTACGCTCATTGTTTCGTAGCTACGATTAGCATCCCGT
ACACCACCT	Kr-Of-Sf-Er_synthetic	AGCTAGCGGCCCCACCCCGTAGCTACGGGATGCTAATCGTAGCTACGCTCATTGTTTCGTAGCTACGTGACCTTGAACGT
ACACCATGG	Kr-Or-Er-Sr_synthetic	AGCTAGCGGCCCCACCCCGTAGCTACGATTAGCATCCCGTAGCTACGTGACCTTGAACGTAGCTACGAAACAATGAGCGT
ACACCCGTA	Sr-Or-Ef_synthetic	AGCTACGAAACAATGAGCGTAGCTACGATTAGCATCCCGTAGCTACGTTCAAGGTCACGT
ACACCGCAT	Of-Er-Kf-Sf_synthetic	AGCTACGGGATGCTAATCGTAGCTACGTGACCTTGAACGTAGCTACGGGGTGGGGCCGCTAGCTACGCTCATTGTTTCGT
ACACCGGTT	Er-Or-Kf-Sr_synthetic	AGCTACGTGACCTTGAACGTAGCTACGATTAGCATCCCGTAGCTACGGGGTGGGGCCGCTAGCTACGAAACAATGAGCGT
ACACCGTGC	Basal
ACACCTGTG	Kr-Er-Of-Sr_synthetic	AGCTAGCGGCCCCACCCCGTAGCTACGTGACCTTGAACGTAGCTACGGGATGCTAATCGTAGCTACGAAACAATGAGCGT
ACACCTTGA	Sf-Kr-Er-Or_synthetic	AGCTACGCTCATTGTTTCGTAGCTAGCGGCCCCACCCCGTAGCTACGTGACCTTGAACGTAGCTACGATTAGCATCCCGT
ACACGCATG	Ef-Sf-Kf-Of_synthetic	AGCTACGTTCAAGGTCACGTAGCTACGCTCATTGTTTCGTAGCTACGGGGTGGGGCCGCTAGCTACGGGATGCTAATCGT
ACACGCTGG	Er-Kf-Sr-Or_synthetic	AGCTACGTGACCTTGAACGTAGCTACGGGGTGGGGCCGCTAGCTACGAAACAATGAGCGTAGCTACGATTAGCATCCCGT
ACACGGACC	Kr-Ef-Sf-Of_synthetic	AGCTAGCGGCCCCACCCCGTAGCTACGTTCAAGGTCACGTAGCTACGCTCATTGTTTCGTAGCTACGGGATGCTAATCGT
ACACGGATT	Basal
ACACGGCAA	Sf-Of-Er-Kf_synthetic	AGCTACGCTCATTGTTTCGTAGCTACGGGATGCTAATCGTAGCTACGTGACCTTGAACGTAGCTACGGGGTGGGGCCGCT
ACACGTCTT	Kr-Er-Or_synthetic	AGCTAGCGGCCCCACCCCGTAGCTACGTGACCTTGAACGTAGCTACGATTAGCATCCCGT
ACACGTGAG	Sf-Of-Ef-Kf_synthetic	AGCTACGCTCATTGTTTCGTAGCTACGGGATGCTAATCGTAGCTACGTTCAAGGTCACGTAGCTACGGGGTGGGGCCGCT
ACACGTGTA	Kf-Sf-Or_synthetic	AGCTACGGGGTGGGGCCGCTAGCTACGCTCATTGTTTCGTAGCTACGATTAGCATCCCGT
ACACTCTGA	Of-Kr-Ef-Sr_synthetic	AGCTACGGGATGCTAATCGTAGCTAGCGGCCCCACCCCGTAGCTACGTTCAAGGTCACGTAGCTACGAAACAATGAGCGT
ACACTGGGC	Ef-Sf-Of-Kf_synthetic	AGCTACGTTCAAGGTCACGTAGCTACGCTCATTGTTTCGTAGCTACGGGATGCTAATCGTAGCTACGGGGTGGGGCCGCT
ACACTTCGC	Sr-Or-Kr-Er_synthetic	AGCTACGAAACAATGAGCGTAGCTACGATTAGCATCCCGTAGCTAGCGGCCCCACCCCGTAGCTACGTGACCTTGAACGT
ACACTTGCT	Of-Kf-Sr-Er_synthetic	AGCTACGGGATGCTAATCGTAGCTACGGGGTGGGGCCGCTAGCTACGAAACAATGAGCGTAGCTACGTGACCTTGAACGT
ACAGACTAC	Of-Sr-Er-Kf_synthetic	AGCTACGGGATGCTAATCGTAGCTACGAAACAATGAGCGTAGCTACGTGACCTTGAACGTAGCTACGGGGTGGGGCCGCT
ACAGATAGA	Or-Kf-Er-Sr_synthetic	AGCTACGATTAGCATCCCGTAGCTACGGGGTGGGGCCGCTAGCTACGTGACCTTGAACGTAGCTACGAAACAATGAGCGT
ACAGATGAT	Sf-Ef-Of_synthetic	AGCTACGCTCATTGTTTCGTAGCTACGTTCAAGGTCACGTAGCTACGGGATGCTAATCGT
ACAGCAAGG	Kf-Sf-Er-Or_synthetic	AGCTACGGGGTGGGGCCGCTAGCTACGCTCATTGTTTCGTAGCTACGTGACCTTGAACGTAGCTACGATTAGCATCCCGT
ACAGCAATA	Of-Kf-Er_synthetic	AGCTACGGGATGCTAATCGTAGCTACGGGGTGGGGCCGCTAGCTACGTGACCTTGAACGT
ACAGCATAT	Or-Kf-Ef-Sf_synthetic	AGCTACGATTAGCATCCCGTAGCTACGGGGTGGGGCCGCTAGCTACGTTCAAGGTCACGTAGCTACGCTCATTGTTTCGT
ACAGCCAAT	Kr-Or-Sr-Er_synthetic	AGCTAGCGGCCCCACCCCGTAGCTACGATTAGCATCCCGTAGCTACGAAACAATGAGCGTAGCTACGTGACCTTGAACGT
ACAGCGAGC	Sf-Kr-Ef_synthetic	AGCTACGCTCATTGTTTCGTAGCTAGCGGCCCCACCCCGTAGCTACGTTCAAGGTCACGT
ACAGCGTAA	Kf-Sr-Or-Er_synthetic	AGCTACGGGGTGGGGCCGCTAGCTACGAAACAATGAGCGTAGCTACGATTAGCATCCCGTAGCTACGTGACCTTGAACGT
ACAGCGTTG	Kr-Of-Sr-Er_synthetic	AGCTAGCGGCCCCACCCCGTAGCTACGGGATGCTAATCGTAGCTACGAAACAATGAGCGTAGCTACGTGACCTTGAACGT
ACAGGACGC	Kf-Or-Er-Sf_synthetic	AGCTACGGGGTGGGGCCGCTAGCTACGATTAGCATCCCGTAGCTACGTGACCTTGAACGTAGCTACGCTCATTGTTTCGT
ACAGGCAGG	Sf-Of-Kf-Ef_synthetic	AGCTACGCTCATTGTTTCGTAGCTACGGGATGCTAATCGTAGCTACGGGGTGGGGCCGCTAGCTACGTTCAAGGTCACGT
ACAGGCTGC	Sr-Ef-Kr_synthetic	AGCTACGAAACAATGAGCGTAGCTACGTTCAAGGTCACGTAGCTAGCGGCCCCACCCCGT
ACAGGTAAC	Sf-Kf-Ef_synthetic	AGCTACGCTCATTGTTTCGTAGCTACGGGGTGGGGCCGCTAGCTACGTTCAAGGTCACGT
ACAGGTACA	Sr-Kf-Or_synthetic	AGCTACGAAACAATGAGCGTAGCTACGGGGTGGGGCCGCTAGCTACGATTAGCATCCCGT
ACAGGTATG	Er-Kf-Sf-Or_synthetic	AGCTACGTGACCTTGAACGTAGCTACGGGGTGGGGCCGCTAGCTACGCTCATTGTTTCGTAGCTACGATTAGCATCCCGT
ACAGTATGT	Or-Sr-Ef-Kr_synthetic	AGCTACGATTAGCATCCCGTAGCTACGAAACAATGAGCGTAGCTACGTTCAAGGTCACGTAGCTAGCGGCCCCACCCCGT
ACAGTCACA	Ef-Of-Sf-Kr_synthetic	AGCTACGTTCAAGGTCACGTAGCTACGGGATGCTAATCGTAGCTACGCTCATTGTTTCGTAGCTAGCGGCCCCACCCCGT
ACAGTGAGA	Sf-Kr-Or-Er_synthetic	AGCTACGCTCATTGTTTCGTAGCTAGCGGCCCCACCCCGTAGCTACGATTAGCATCCCGTAGCTACGTGACCTTGAACGT
ACAGTGATG	Kf-Or-Sr_synthetic	AGCTACGGGGTGGGGCCGCTAGCTACGATTAGCATCCCGTAGCTACGAAACAATGAGCGT
ACAGTTGAA	Ef-Kf-Or-Sr_synthetic	AGCTACGTTCAAGGTCACGTAGCTACGGGGTGGGGCCGCTAGCTACGATTAGCATCCCGTAGCTACGAAACAATGAGCGT
ACATAAAGC	Or-Kf-Ef_synthetic	AGCTACGATTAGCATCCCGTAGCTACGGGGTGGGGCCGCTAGCTACGTTCAAGGTCACGT
ACATAAGTG	Kf-Er_synthetic	AGCTACGGGGTGGGGCCGCTAGCTACGTGACCTTGAACGT
ACATACGGC	Or-Er-Sr_synthetic	AGCTACGATTAGCATCCCGTAGCTACGTGACCTTGAACGTAGCTACGAAACAATGAGCGT
ACATAGCAT	Of-Kf-Ef_synthetic	AGCTACGGGATGCTAATCGTAGCTACGGGGTGGGGCCGCTAGCTACGTTCAAGGTCACGT
ACATCACCC	Kf-Sr-Of_synthetic	AGCTACGGGGTGGGGCCGCTAGCTACGAAACAATGAGCGTAGCTACGGGATGCTAATCGT
ACATCCAAA	Sf-Kf-Ef-Of_synthetic	AGCTACGCTCATTGTTTCGTAGCTACGGGGTGGGGCCGCTAGCTACGTTCAAGGTCACGTAGCTACGGGATGCTAATCGT
ACATCTGAT	Er-Kf-Or-Sr_synthetic	AGCTACGTGACCTTGAACGTAGCTACGGGGTGGGGCCGCTAGCTACGATTAGCATCCCGTAGCTACGAAACAATGAGCGT
ACATGAAAG	Sf-Of-Er-Kf_synthetic	AGCTACGCTCATTGTTTCGTAGCTACGGGATGCTAATCGTAGCTACGTGACCTTGAACGTAGCTACGGGGTGGGGCCGCT
ACATGACAA	Kr-Ef-Or-Sr_synthetic	AGCTAGCGGCCCCACCCCGTAGCTACGTTCAAGGTCACGTAGCTACGATTAGCATCCCGTAGCTACGAAACAATGAGCGT
ACATGCGCT	Sf-Kf-Or-Er_synthetic	AGCTACGCTCATTGTTTCGTAGCTACGGGGTGGGGCCGCTAGCTACGATTAGCATCCCGTAGCTACGTGACCTTGAACGT
ACATGGACT	Or-Kr-Sf_synthetic	AGCTACGATTAGCATCCCGTAGCTAGCGGCCCCACCCCGTAGCTACGCTCATTGTTTCGT
ACATGGCCG	Ef-Sf-Kr-Or_synthetic	AGCTACGTTCAAGGTCACGTAGCTACGCTCATTGTTTCGTAGCTAGCGGCCCCACCCCGTAGCTACGATTAGCATCCCGT
ACATGGGAG	Er-Or-Sf-Kr_synthetic	AGCTACGTGACCTTGAACGTAGCTACGATTAGCATCCCGTAGCTACGCTCATTGTTTCGTAGCTAGCGGCCCCACCCCGT
ACATGGGTA	Ef-Or_synthetic	AGCTACGTTCAAGGTCACGTAGCTACGATTAGCATCCCGT
ACATGTAGG	Kf-Sr-Of_synthetic	AGCTACGGGGTGGGGCCGCTAGCTACGAAACAATGAGCGTAGCTACGGGATGCTAATCGT
ACATGTTTG	Or-Kf-Sr-Ef_synthetic	AGCTACGATTAGCATCCCGTAGCTACGGGGTGGGGCCGCTAGCTACGAAACAATGAGCGTAGCTACGTTCAAGGTCACGT
ACATTATGC	Kf-Sf-Of_synthetic	AGCTACGGGGTGGGGCCGCTAGCTACGCTCATTGTTTCGTAGCTACGGGATGCTAATCGT
ACATTCCAA	Or-Ef-Sf-Kf_synthetic	AGCTACGATTAGCATCCCGTAGCTACGTTCAAGGTCACGTAGCTACGCTCATTGTTTCGTAGCTACGGGGTGGGGCCGCT
ACATTGCGG	Kf-Er-Of-Sr_synthetic	AGCTACGGGGTGGGGCCGCTAGCTACGTGACCTTGAACGTAGCTACGGGATGCTAATCGTAGCTACGAAACAATGAGCGT
ACATTTCCG	Or-Kr-Ef_synthetic	AGCTACGATTAGCATCCCGTAGCTAGCGGCCCCACCCCGTAGCTACGTTCAAGGTCACGT
ACCAAATTC	Sf-Kf-Er_synthetic	AGCTACGCTCATTGTTTCGTAGCTACGGGGTGGGGCCGCTAGCTACGTGACCTTGAACGT
ACCAACAGG	Kf-Sr_synthetic	AGCTACGGGGTGGGGCCGCTAGCTACGAAACAATGAGCGT
ACCAAGATT	Of-Sr-Er-Kf_synthetic	AGCTACGGGATGCTAATCGTAGCTACGAAACAATGAGCGTAGCTACGTGACCTTGAACGTAGCTACGGGGTGGGGCCGCT
ACCAATACG	Er-Kr-Of_synthetic	AGCTACGTGACCTTGAACGTAGCTAGCGGCCCCACCCCGTAGCTACGGGATGCTAATCGT
ACCACAAGA	Kf-Of-Sr_synthetic	AGCTACGGGGTGGGGCCGCTAGCTACGGGATGCTAATCGTAGCTACGAAACAATGAGCGT
ACCACGTTC	Ef-Or-Sr-Kf_synthetic	AGCTACGTTCAAGGTCACGTAGCTACGATTAGCATCCCGTAGCTACGAAACAATGAGCGTAGCTACGGGGTGGGGCCGCT
ACCACTGAC	Kf-Sr-Or-Er_synthetic	AGCTACGGGGTGGGGCCGCTAGCTACGAAACAATGAGCGTAGCTACGATTAGCATCCCGTAGCTACGTGACCTTGAACGT
ACCAGAAAT	Sf-Kr-Or_synthetic	AGCTACGCTCATTGTTTCGTAGCTAGCGGCCCCACCCCGTAGCTACGATTAGCATCCCGT
ACCAGGCGA	Er-Kr-Or_synthetic	AGCTACGTGACCTTGAACGTAGCTAGCGGCCCCACCCCGTAGCTACGATTAGCATCCCGT
ACCAGTAGT	Er-Kr-Or-Sr_synthetic	AGCTACGTGACCTTGAACGTAGCTAGCGGCCCCACCCCGTAGCTACGATTAGCATCCCGTAGCTACGAAACAATGAGCGT
ACCAGTTGC	Er-Sf-Kf-Of_synthetic	AGCTACGTGACCTTGAACGTAGCTACGCTCATTGTTTCGTAGCTACGGGGTGGGGCCGCTAGCTACGGGATGCTAATCGT
ACCATAAAC	Of-Er-Kf-Sr_synthetic	AGCTACGGGATGCTAATCGTAGCTACGTGACCTTGAACGTAGCTACGGGGTGGGGCCGCTAGCTACGAAACAATGAGCGT
ACCATCACC	Er-Kr-Of-Sr_synthetic	AGCTACGTGACCTTGAACGTAGCTAGCGGCCCCACCCCGTAGCTACGGGATGCTAATCGTAGCTACGAAACAATGAGCGT
ACCATCCCT	Kr-Of-Sr_synthetic	AGCTAGCGGCCCCACCCCGTAGCTACGGGATGCTAATCGTAGCTACGAAACAATGAGCGT
ACCATCGAG	Of-Kf-Ef_synthetic	AGCTACGGGATGCTAATCGTAGCTACGGGGTGGGGCCGCTAGCTACGTTCAAGGTCACGT
ACCATCTCG	Kr-Er-Of-Sf_synthetic	AGCTAGCGGCCCCACCCCGTAGCTACGTGACCTTGAACGTAGCTACGGGATGCTAATCGTAGCTACGCTCATTGTTTCGT
ACCATGGCA	Ef-Kr-Sf_synthetic	AGCTACGTTCAAGGTCACGTAGCTAGCGGCCCCACCCCGTAGCTACGCTCATTGTTTCGT
ACCATGGGC	Sr-Kf_synthetic	AGCTACGAAACAATGAGCGTAGCTACGGGGTGGGGCCGCT
ACCATGTAG	Or-Ef-Kf-Sf_synthetic	AGCTACGATTAGCATCCCGTAGCTACGTTCAAGGTCACGTAGCTACGGGGTGGGGCCGCTAGCTACGCTCATTGTTTCGT
ACCATTCAA	Kf-Or-Ef_synthetic	AGCTACGGGGTGGGGCCGCTAGCTACGATTAGCATCCCGTAGCTACGTTCAAGGTCACGT
ACCATTCTG	Er-Kf-Sr-Or_synthetic	AGCTACGTGACCTTGAACGTAGCTACGGGGTGGGGCCGCTAGCTACGAAACAATGAGCGTAGCTACGATTAGCATCCCGT
ACCATTGCC	Kr-Ef-Or_synthetic	AGCTAGCGGCCCCACCCCGTAGCTACGTTCAAGGTCACGTAGCTACGATTAGCATCCCGT
ACCATTGTT	Basal
ACCCAACCT	Ef-Or-Sr-Kr_synthetic	AGCTACGTTCAAGGTCACGTAGCTACGATTAGCATCCCGTAGCTACGAAACAATGAGCGTAGCTAGCGGCCCCACCCCGT
ACCCAATAC	Or-Sf-Kf_synthetic	AGCTACGATTAGCATCCCGTAGCTACGCTCATTGTTTCGTAGCTACGGGGTGGGGCCGCT
ACCCACACT	Sr-Or-Er-Kf_synthetic	AGCTACGAAACAATGAGCGTAGCTACGATTAGCATCCCGTAGCTACGTGACCTTGAACGTAGCTACGGGGTGGGGCCGCT
ACCCACCAC	Of-Er-Kf-Sf_synthetic	AGCTACGGGATGCTAATCGTAGCTACGTGACCTTGAACGTAGCTACGGGGTGGGGCCGCTAGCTACGCTCATTGTTTCGT
ACCCACTAT	Kr-Er-Sr-Of_synthetic	AGCTAGCGGCCCCACCCCGTAGCTACGTGACCTTGAACGTAGCTACGAAACAATGAGCGTAGCTACGGGATGCTAATCGT
ACCCAGCAA	Of-Er-Sr-Kf_synthetic	AGCTACGGGATGCTAATCGTAGCTACGTGACCTTGAACGTAGCTACGAAACAATGAGCGTAGCTACGGGGTGGGGCCGCT
ACCCAGGCA	Sf-Ef-Of-Kr_synthetic	AGCTACGCTCATTGTTTCGTAGCTACGTTCAAGGTCACGTAGCTACGGGATGCTAATCGTAGCTAGCGGCCCCACCCCGT
ACCCATCAT	Sr-Ef-Or-Kr_synthetic	AGCTACGAAACAATGAGCGTAGCTACGTTCAAGGTCACGTAGCTACGATTAGCATCCCGTAGCTAGCGGCCCCACCCCGT
ACCCGTATC	Ef-Of-Kf-Sf_synthetic	AGCTACGTTCAAGGTCACGTAGCTACGGGATGCTAATCGTAGCTACGGGGTGGGGCCGCTAGCTACGCTCATTGTTTCGT
ACCCGTTCA	Kf-Sr-Ef_synthetic	AGCTACGGGGTGGGGCCGCTAGCTACGAAACAATGAGCGTAGCTACGTTCAAGGTCACGT
ACCCTAACG	Of-Er-Kf_synthetic	AGCTACGGGATGCTAATCGTAGCTACGTGACCTTGAACGTAGCTACGGGGTGGGGCCGCT
ACCCTATTG	Sr-Kf-Ef-Or_synthetic	AGCTACGAAACAATGAGCGTAGCTACGGGGTGGGGCCGCTAGCTACGTTCAAGGTCACGTAGCTACGATTAGCATCCCGT
ACCCTCACA	Sr-Kf-Ef_synthetic	AGCTACGAAACAATGAGCGTAGCTACGGGGTGGGGCCGCTAGCTACGTTCAAGGTCACGT
ACCCTCTGC	Sf-Kr-Ef-Or_synthetic	AGCTACGCTCATTGTTTCGTAGCTAGCGGCCCCACCCCGTAGCTACGTTCAAGGTCACGTAGCTACGATTAGCATCCCGT
ACCCTGCTG	Er-Or-Kf_synthetic	AGCTACGTGACCTTGAACGTAGCTACGATTAGCATCCCGTAGCTACGGGGTGGGGCCGCT
ACCCTTAGG	Kr-Sf-Of-Ef_synthetic	AGCTAGCGGCCCCACCCCGTAGCTACGCTCATTGTTTCGTAGCTACGGGATGCTAATCGTAGCTACGTTCAAGGTCACGT
ACCGAAACA	Of-Kr-Sf_synthetic	AGCTACGGGATGCTAATCGTAGCTAGCGGCCCCACCCCGTAGCTACGCTCATTGTTTCGT
ACCGAAAGG	Or-Kf-Ef_synthetic	AGCTACGATTAGCATCCCGTAGCTACGGGGTGGGGCCGCTAGCTACGTTCAAGGTCACGT
ACCGAACAT	Sr-Kf-Er-Of_synthetic	AGCTACGAAACAATGAGCGTAGCTACGGGGTGGGGCCGCTAGCTACGTGACCTTGAACGTAGCTACGGGATGCTAATCGT
ACCGAACTG	Of-Kf-Sr-Ef_synthetic	AGCTACGGGATGCTAATCGTAGCTACGGGGTGGGGCCGCTAGCTACGAAACAATGAGCGTAGCTACGTTCAAGGTCACGT
ACCGAAGTC	Of-Kf-Sf-Er_synthetic	AGCTACGGGATGCTAATCGTAGCTACGGGGTGGGGCCGCTAGCTACGCTCATTGTTTCGTAGCTACGTGACCTTGAACGT
ACCGACACG	Or-Er-Sf_synthetic	AGCTACGATTAGCATCCCGTAGCTACGTGACCTTGAACGTAGCTACGCTCATTGTTTCGT
ACCGACGTT	Sr-Kr-Ef-Of_synthetic	AGCTACGAAACAATGAGCGTAGCTAGCGGCCCCACCCCGTAGCTACGTTCAAGGTCACGTAGCTACGGGATGCTAATCGT
ACCGACTAA	Or-Sr-Kf_synthetic	AGCTACGATTAGCATCCCGTAGCTACGAAACAATGAGCGTAGCTACGGGGTGGGGCCGCT
ACCGAGAAC	OrKrEf_CMF-Scalar	AGCTACGATTAGCATCCCGTAGCTAGCGGCCCCGCCCCGTAGCTACGTTCAAGGTCACGT
ACCGAGATG	Sr-Er_synthetic	AGCTACGAAACAATGAGCGTAGCTACGTGACCTTGAACGT
ACCGAGCCA	Of-Sr-Ef-Kf_synthetic	AGCTACGGGATGCTAATCGTAGCTACGAAACAATGAGCGTAGCTACGTTCAAGGTCACGTAGCTACGGGGTGGGGCCGCT
ACCGCTAGA	Or-Kr-Sf_synthetic	AGCTACGATTAGCATCCCGTAGCTAGCGGCCCCACCCCGTAGCTACGCTCATTGTTTCGT
ACCGCTCAA	Sf-Of-Ef_synthetic	AGCTACGCTCATTGTTTCGTAGCTACGGGATGCTAATCGTAGCTACGTTCAAGGTCACGT
ACCGCTTAG	Kr-Sf-Ef-Or_synthetic	AGCTAGCGGCCCCACCCCGTAGCTACGCTCATTGTTTCGTAGCTACGTTCAAGGTCACGTAGCTACGATTAGCATCCCGT
ACCGGACAC	Sf-Of-Kf-Ef_synthetic	AGCTACGCTCATTGTTTCGTAGCTACGGGATGCTAATCGTAGCTACGGGGTGGGGCCGCTAGCTACGTTCAAGGTCACGT
ACCGGACTT	Or-Ef-Kr-Sr_synthetic	AGCTACGATTAGCATCCCGTAGCTACGTTCAAGGTCACGTAGCTAGCGGCCCCACCCCGTAGCTACGAAACAATGAGCGT
ACCGGGAAG	Ef-Sf-Of-Kf_synthetic	AGCTACGTTCAAGGTCACGTAGCTACGCTCATTGTTTCGTAGCTACGGGATGCTAATCGTAGCTACGGGGTGGGGCCGCT
ACCGGGATT	Sf-Kr-Or-Ef_synthetic	AGCTACGCTCATTGTTTCGTAGCTAGCGGCCCCACCCCGTAGCTACGATTAGCATCCCGTAGCTACGTTCAAGGTCACGT
ACCGGTGAT	Ef-Sr-Or-Kr_synthetic	AGCTACGTTCAAGGTCACGTAGCTACGAAACAATGAGCGTAGCTACGATTAGCATCCCGTAGCTAGCGGCCCCACCCCGT
ACCGTAGCC	Ef-Of-Sr-Kr_synthetic	AGCTACGTTCAAGGTCACGTAGCTACGGGATGCTAATCGTAGCTACGAAACAATGAGCGTAGCTAGCGGCCCCACCCCGT
ACCGTCACT	Kf-Or-Ef-Sf_synthetic	AGCTACGGGGTGGGGCCGCTAGCTACGATTAGCATCCCGTAGCTACGTTCAAGGTCACGTAGCTACGCTCATTGTTTCGT
ACCGTGATC	Kr-Sr-Er-Of_synthetic	AGCTAGCGGCCCCACCCCGTAGCTACGAAACAATGAGCGTAGCTACGTGACCTTGAACGTAGCTACGGGATGCTAATCGT
ACCGTTTCC	Kf-Of-Sr-Er_synthetic	AGCTACGGGGTGGGGCCGCTAGCTACGGGATGCTAATCGTAGCTACGAAACAATGAGCGTAGCTACGTGACCTTGAACGT
ACCTACAAA	Er-Sf-Kr-Of_synthetic	AGCTACGTGACCTTGAACGTAGCTACGCTCATTGTTTCGTAGCTAGCGGCCCCACCCCGTAGCTACGGGATGCTAATCGT
ACCTACATT	Kf-Ef-Sr-Or_synthetic	AGCTACGGGGTGGGGCCGCTAGCTACGTTCAAGGTCACGTAGCTACGAAACAATGAGCGTAGCTACGATTAGCATCCCGT
ACCTACGCA	Kr-Sf-Or-Er_synthetic	AGCTAGCGGCCCCACCCCGTAGCTACGCTCATTGTTTCGTAGCTACGATTAGCATCCCGTAGCTACGTGACCTTGAACGT
ACCTACTGG	Sf-Or-Er_synthetic	AGCTACGCTCATTGTTTCGTAGCTACGATTAGCATCCCGTAGCTACGTGACCTTGAACGT
ACCTAGACT	Kf-Or-Sr-Ef_synthetic	AGCTACGGGGTGGGGCCGCTAGCTACGATTAGCATCCCGTAGCTACGAAACAATGAGCGTAGCTACGTTCAAGGTCACGT
ACCTAGGGT	Kr-Ef-Of_synthetic	AGCTAGCGGCCCCACCCCGTAGCTACGTTCAAGGTCACGTAGCTACGGGATGCTAATCGT
ACCTAGTAA	Or-Er-Sf-Kr_synthetic	AGCTACGATTAGCATCCCGTAGCTACGTGACCTTGAACGTAGCTACGCTCATTGTTTCGTAGCTAGCGGCCCCACCCCGT
ACCTAGTTG	Sr-Of-Ef-Kr_synthetic	AGCTACGAAACAATGAGCGTAGCTACGGGATGCTAATCGTAGCTACGTTCAAGGTCACGTAGCTAGCGGCCCCACCCCGT
ACCTATCTG	Of-Kf-Ef-Sf_synthetic	AGCTACGGGATGCTAATCGTAGCTACGGGGTGGGGCCGCTAGCTACGTTCAAGGTCACGTAGCTACGCTCATTGTTTCGT
ACCTATGTA	Er-Kr-Sr-Of_synthetic	AGCTACGTGACCTTGAACGTAGCTAGCGGCCCCACCCCGTAGCTACGAAACAATGAGCGTAGCTACGGGATGCTAATCGT
ACCTCCAAT	Er-Of-Sf_synthetic	AGCTACGTGACCTTGAACGTAGCTACGGGATGCTAATCGTAGCTACGCTCATTGTTTCGT
ACCTCGACA	Sf-Ef-Or_synthetic	AGCTACGCTCATTGTTTCGTAGCTACGTTCAAGGTCACGTAGCTACGATTAGCATCCCGT
ACCTCGCTG	Or-Sf-Ef_synthetic	AGCTACGATTAGCATCCCGTAGCTACGCTCATTGTTTCGTAGCTACGTTCAAGGTCACGT
ACCTCTAGG	Or-Kr_synthetic	AGCTACGATTAGCATCCCGTAGCTAGCGGCCCCACCCCGT
ACCTCTTCG	SfOfSfKf_CMF-Scalar	AGCTACGCTCATTGTTTCGTAGCTACGGGATGCTAATCGTAGCTACGCTCATTGTTTCGTAGCTACGGGGCGGGGCCGCT
ACCTGACTA	Of-Kr-Sr-Er_synthetic	AGCTACGGGATGCTAATCGTAGCTAGCGGCCCCACCCCGTAGCTACGAAACAATGAGCGTAGCTACGTGACCTTGAACGT
ACCTGAGTC	Kr-Ef-Sr-Or_synthetic	AGCTAGCGGCCCCACCCCGTAGCTACGTTCAAGGTCACGTAGCTACGAAACAATGAGCGTAGCTACGATTAGCATCCCGT
ACCTGCACA	Kf-Er-Or_synthetic	AGCTACGGGGTGGGGCCGCTAGCTACGTGACCTTGAACGTAGCTACGATTAGCATCCCGT
ACCTGCCTT	Or-Sf-Er-Kf_synthetic	AGCTACGATTAGCATCCCGTAGCTACGCTCATTGTTTCGTAGCTACGTGACCTTGAACGTAGCTACGGGGTGGGGCCGCT
ACCTGTGTT	Er-Sf-Of_synthetic	AGCTACGTGACCTTGAACGTAGCTACGCTCATTGTTTCGTAGCTACGGGATGCTAATCGT
ACCTTAGAT	Kr-Ef-Sr_synthetic	AGCTAGCGGCCCCACCCCGTAGCTACGTTCAAGGTCACGTAGCTACGAAACAATGAGCGT
ACCTTAGCG	Of-Sr-Ef_synthetic	AGCTACGGGATGCTAATCGTAGCTACGAAACAATGAGCGTAGCTACGTTCAAGGTCACGT
ACCTTGAGT	Sr-Er-Or-Kr_synthetic	AGCTACGAAACAATGAGCGTAGCTACGTGACCTTGAACGTAGCTACGATTAGCATCCCGTAGCTAGCGGCCCCACCCCGT
ACCTTTACT	Ef-Kr-Sr_synthetic	AGCTACGTTCAAGGTCACGTAGCTAGCGGCCCCACCCCGTAGCTACGAAACAATGAGCGT
ACGAAACTG	Kr-Or-Ef-Sr_synthetic	AGCTAGCGGCCCCACCCCGTAGCTACGATTAGCATCCCGTAGCTACGTTCAAGGTCACGTAGCTACGAAACAATGAGCGT
ACGAAAGTT	Sf-Kr-Ef_synthetic	AGCTACGCTCATTGTTTCGTAGCTAGCGGCCCCACCCCGTAGCTACGTTCAAGGTCACGT
ACGAACCGG	Sf-Or-Kr_synthetic	AGCTACGCTCATTGTTTCGTAGCTACGATTAGCATCCCGTAGCTAGCGGCCCCACCCCGT
ACGAACGGC	Of-Kr-Sf-Er_synthetic	AGCTACGGGATGCTAATCGTAGCTAGCGGCCCCACCCCGTAGCTACGCTCATTGTTTCGTAGCTACGTGACCTTGAACGT
ACGAATGAA	Or-Kf-Sf-Er_synthetic	AGCTACGATTAGCATCCCGTAGCTACGGGGTGGGGCCGCTAGCTACGCTCATTGTTTCGTAGCTACGTGACCTTGAACGT
ACGACAATA	Kf-Ef-Sf-Of_synthetic	AGCTACGGGGTGGGGCCGCTAGCTACGTTCAAGGTCACGTAGCTACGCTCATTGTTTCGTAGCTACGGGATGCTAATCGT
ACGACCGCT	Sr-Of-Kr-Er_synthetic	AGCTACGAAACAATGAGCGTAGCTACGGGATGCTAATCGTAGCTAGCGGCCCCACCCCGTAGCTACGTGACCTTGAACGT
ACGACTCTT	Or-Kr-Sf-Er_synthetic	AGCTACGATTAGCATCCCGTAGCTAGCGGCCCCACCCCGTAGCTACGCTCATTGTTTCGTAGCTACGTGACCTTGAACGT
ACGACTGTA	Kf-Er_synthetic	AGCTACGGGGTGGGGCCGCTAGCTACGTGACCTTGAACGT
ACGAGAGCG	Sf-Er_synthetic	AGCTACGCTCATTGTTTCGTAGCTACGTGACCTTGAACGT
ACGAGAGTC	Of-Ef-Sr-Kf_synthetic	AGCTACGGGATGCTAATCGTAGCTACGTTCAAGGTCACGTAGCTACGAAACAATGAGCGTAGCTACGGGGTGGGGCCGCT
ACGAGGATT	Of-Sr-Kf-Er_synthetic	AGCTACGGGATGCTAATCGTAGCTACGAAACAATGAGCGTAGCTACGGGGTGGGGCCGCTAGCTACGTGACCTTGAACGT
ACGAGGTGG	Of-Sr_synthetic	AGCTACGGGATGCTAATCGTAGCTACGAAACAATGAGCGT
ACGAGTATA	Sr-Ef-Kr-Of_synthetic	AGCTACGAAACAATGAGCGTAGCTACGTTCAAGGTCACGTAGCTAGCGGCCCCACCCCGTAGCTACGGGATGCTAATCGT
ACGAGTGCT	Of-Kf-Ef-Sf_synthetic	AGCTACGGGATGCTAATCGTAGCTACGGGGTGGGGCCGCTAGCTACGTTCAAGGTCACGTAGCTACGCTCATTGTTTCGT
ACGAGTTCG	Sf-Of-Er_synthetic	AGCTACGCTCATTGTTTCGTAGCTACGGGATGCTAATCGTAGCTACGTGACCTTGAACGT
ACGATAAGC	Sr-Or-Kf_synthetic	AGCTACGAAACAATGAGCGTAGCTACGATTAGCATCCCGTAGCTACGGGGTGGGGCCGCT
ACGATCGGA	Sf-Of-Er_synthetic	AGCTACGCTCATTGTTTCGTAGCTACGGGATGCTAATCGTAGCTACGTGACCTTGAACGT
ACGATCTGG	Sf-Or-Kr-Er_synthetic	AGCTACGCTCATTGTTTCGTAGCTACGATTAGCATCCCGTAGCTAGCGGCCCCACCCCGTAGCTACGTGACCTTGAACGT
ACGATTACG	Or-Sr-Kf_synthetic	AGCTACGATTAGCATCCCGTAGCTACGAAACAATGAGCGTAGCTACGGGGTGGGGCCGCT
ACGATTCAT	Or-Kf-Ef-Sr_synthetic	AGCTACGATTAGCATCCCGTAGCTACGGGGTGGGGCCGCTAGCTACGTTCAAGGTCACGTAGCTACGAAACAATGAGCGT
ACGATTCCC	Or-Kr-Ef-Sf_synthetic	AGCTACGATTAGCATCCCGTAGCTAGCGGCCCCACCCCGTAGCTACGTTCAAGGTCACGTAGCTACGCTCATTGTTTCGT
ACGATTTAC	Sf-Kr-Or-Er_synthetic	AGCTACGCTCATTGTTTCGTAGCTAGCGGCCCCACCCCGTAGCTACGATTAGCATCCCGTAGCTACGTGACCTTGAACGT
ACGCAAACT	Kr-Or_synthetic	AGCTAGCGGCCCCACCCCGTAGCTACGATTAGCATCCCGT
ACGCAACGA	Kr-Sr-Ef-Or_synthetic	AGCTAGCGGCCCCACCCCGTAGCTACGAAACAATGAGCGTAGCTACGTTCAAGGTCACGTAGCTACGATTAGCATCCCGT
ACGCACAGA	Sr-Of-Ef-Kr_synthetic	AGCTACGAAACAATGAGCGTAGCTACGGGATGCTAATCGTAGCTACGTTCAAGGTCACGTAGCTAGCGGCCCCACCCCGT
ACGCACTAC	Sf-Of-Kf_synthetic	AGCTACGCTCATTGTTTCGTAGCTACGGGATGCTAATCGTAGCTACGGGGTGGGGCCGCT
ACGCACTTA	Or-Sf-Ef-Kr_synthetic	AGCTACGATTAGCATCCCGTAGCTACGCTCATTGTTTCGTAGCTACGTTCAAGGTCACGTAGCTAGCGGCCCCACCCCGT
ACGCAGATG	Of-Sr-Kr-Ef_synthetic	AGCTACGGGATGCTAATCGTAGCTACGAAACAATGAGCGTAGCTAGCGGCCCCACCCCGTAGCTACGTTCAAGGTCACGT
ACGCATACC	Of-Sr-Kr-Er_synthetic	AGCTACGGGATGCTAATCGTAGCTACGAAACAATGAGCGTAGCTAGCGGCCCCACCCCGTAGCTACGTGACCTTGAACGT
ACGCATGCT	Kf-Sf-Ef_synthetic	AGCTACGGGGTGGGGCCGCTAGCTACGCTCATTGTTTCGTAGCTACGTTCAAGGTCACGT
ACGCATTGC	Kr-Or_synthetic	AGCTAGCGGCCCCACCCCGTAGCTACGATTAGCATCCCGT
ACGCCAATC	Er-Sr-Kr-Or_synthetic	AGCTACGTGACCTTGAACGTAGCTACGAAACAATGAGCGTAGCTAGCGGCCCCACCCCGTAGCTACGATTAGCATCCCGT
ACGCCAGCA	Kr-Sr-Er_synthetic	AGCTAGCGGCCCCACCCCGTAGCTACGAAACAATGAGCGTAGCTACGTGACCTTGAACGT
ACGCCCTAT	Sf-Or-Kf_synthetic	AGCTACGCTCATTGTTTCGTAGCTACGATTAGCATCCCGTAGCTACGGGGTGGGGCCGCT
ACGCGAATT	Sf-Ef-Or-Kf_synthetic	AGCTACGCTCATTGTTTCGTAGCTACGTTCAAGGTCACGTAGCTACGATTAGCATCCCGTAGCTACGGGGTGGGGCCGCT
ACGCGCTAA	Sf-Or-Kr-Ef_synthetic	AGCTACGCTCATTGTTTCGTAGCTACGATTAGCATCCCGTAGCTAGCGGCCCCACCCCGTAGCTACGTTCAAGGTCACGT
ACGCTACTT	Sr-Kr-Ef-Or_synthetic	AGCTACGAAACAATGAGCGTAGCTAGCGGCCCCACCCCGTAGCTACGTTCAAGGTCACGTAGCTACGATTAGCATCCCGT
ACGCTGAGG	Kr-Sf-Of-Er_synthetic	AGCTAGCGGCCCCACCCCGTAGCTACGCTCATTGTTTCGTAGCTACGGGATGCTAATCGTAGCTACGTGACCTTGAACGT
ACGCTGCCT	Ef-Or-Kr-Sf_synthetic	AGCTACGTTCAAGGTCACGTAGCTACGATTAGCATCCCGTAGCTAGCGGCCCCACCCCGTAGCTACGCTCATTGTTTCGT
ACGCTTCGG	Ef-Sr-Of_synthetic	AGCTACGTTCAAGGTCACGTAGCTACGAAACAATGAGCGTAGCTACGGGATGCTAATCGT
ACGCTTGGT	Kr-Or-Sf-Ef_synthetic	AGCTAGCGGCCCCACCCCGTAGCTACGATTAGCATCCCGTAGCTACGCTCATTGTTTCGTAGCTACGTTCAAGGTCACGT
ACGGAAATT	Sf-Kf-Or-Ef_synthetic	AGCTACGCTCATTGTTTCGTAGCTACGGGGTGGGGCCGCTAGCTACGATTAGCATCCCGTAGCTACGTTCAAGGTCACGT
ACGGAATTG	Or-Sr-Kf_synthetic	AGCTACGATTAGCATCCCGTAGCTACGAAACAATGAGCGTAGCTACGGGGTGGGGCCGCT
ACGGATACG	Sf-Or-Ef-Kf_synthetic	AGCTACGCTCATTGTTTCGTAGCTACGATTAGCATCCCGTAGCTACGTTCAAGGTCACGTAGCTACGGGGTGGGGCCGCT
ACGGATTTC	Or-Kr-Sf-Ef_synthetic	AGCTACGATTAGCATCCCGTAGCTAGCGGCCCCACCCCGTAGCTACGCTCATTGTTTCGTAGCTACGTTCAAGGTCACGT
ACGGCGGTA	Er-Or_synthetic	AGCTACGTGACCTTGAACGTAGCTACGATTAGCATCCCGT
ACGGCGTAT	Kr-Er-Sr-Or_synthetic	AGCTAGCGGCCCCACCCCGTAGCTACGTGACCTTGAACGTAGCTACGAAACAATGAGCGTAGCTACGATTAGCATCCCGT
ACGGCGTTC	Kf-Sr-Er_synthetic	AGCTACGGGGTGGGGCCGCTAGCTACGAAACAATGAGCGTAGCTACGTGACCTTGAACGT
ACGGCTATG	Or-Ef-Sf_synthetic	AGCTACGATTAGCATCCCGTAGCTACGTTCAAGGTCACGTAGCTACGCTCATTGTTTCGT
ACGGCTGCA	Kr-Ef-Or-Sf_synthetic	AGCTAGCGGCCCCACCCCGTAGCTACGTTCAAGGTCACGTAGCTACGATTAGCATCCCGTAGCTACGCTCATTGTTTCGT
ACGGGAGCT	Of-Sf_synthetic	AGCTACGGGATGCTAATCGTAGCTACGCTCATTGTTTCGT
ACGGGATGC	Er-Or-Sr-Kf_synthetic	AGCTACGTGACCTTGAACGTAGCTACGATTAGCATCCCGTAGCTACGAAACAATGAGCGTAGCTACGGGGTGGGGCCGCT
ACGGGCCAA	Er-Kr-Of-Sf_synthetic	AGCTACGTGACCTTGAACGTAGCTAGCGGCCCCACCCCGTAGCTACGGGATGCTAATCGTAGCTACGCTCATTGTTTCGT
ACGGGTGAA	Ef-Or_synthetic	AGCTACGTTCAAGGTCACGTAGCTACGATTAGCATCCCGT
ACGGGTTAC	Ef-Kf-Sr_synthetic	AGCTACGTTCAAGGTCACGTAGCTACGGGGTGGGGCCGCTAGCTACGAAACAATGAGCGT
ACGGTAAAC	Sf-Kf-Er-Of_synthetic	AGCTACGCTCATTGTTTCGTAGCTACGGGGTGGGGCCGCTAGCTACGTGACCTTGAACGTAGCTACGGGATGCTAATCGT
ACGGTAGCG	Of-Ef-Kf-Sf_synthetic	AGCTACGGGATGCTAATCGTAGCTACGTTCAAGGTCACGTAGCTACGGGGTGGGGCCGCTAGCTACGCTCATTGTTTCGT
ACGGTCCCA	Kf-Of-Ef-Sr_synthetic	AGCTACGGGGTGGGGCCGCTAGCTACGGGATGCTAATCGTAGCTACGTTCAAGGTCACGTAGCTACGAAACAATGAGCGT
ACGGTCGAC	Of-Sf-Kf-Ef_synthetic	AGCTACGGGATGCTAATCGTAGCTACGCTCATTGTTTCGTAGCTACGGGGTGGGGCCGCTAGCTACGTTCAAGGTCACGT
ACGGTCTAG	Kf-Or-Sf_synthetic	AGCTACGGGGTGGGGCCGCTAGCTACGATTAGCATCCCGTAGCTACGCTCATTGTTTCGT
ACGGTGGGA	Sr-Kr-Or_synthetic	AGCTACGAAACAATGAGCGTAGCTAGCGGCCCCACCCCGTAGCTACGATTAGCATCCCGT
ACGTAACGC	Or-Er-Sr-Kf_synthetic	AGCTACGATTAGCATCCCGTAGCTACGTGACCTTGAACGTAGCTACGAAACAATGAGCGTAGCTACGGGGTGGGGCCGCT
ACGTAGCGT	Or-Kr-Er_synthetic	AGCTACGATTAGCATCCCGTAGCTAGCGGCCCCACCCCGTAGCTACGTGACCTTGAACGT
ACGTAGTTC	Sr-Kf-Of_synthetic	AGCTACGAAACAATGAGCGTAGCTACGGGGTGGGGCCGCTAGCTACGGGATGCTAATCGT
ACGTATAAG	Or-Ef-Kr-Sf_synthetic	AGCTACGATTAGCATCCCGTAGCTACGTTCAAGGTCACGTAGCTAGCGGCCCCACCCCGTAGCTACGCTCATTGTTTCGT
ACGTCGCAA	Sr-Of-Kf-Er_synthetic	AGCTACGAAACAATGAGCGTAGCTACGGGATGCTAATCGTAGCTACGGGGTGGGGCCGCTAGCTACGTGACCTTGAACGT
ACGTCTATA	Kr-Ef-Sf-Or_synthetic	AGCTAGCGGCCCCACCCCGTAGCTACGTTCAAGGTCACGTAGCTACGCTCATTGTTTCGTAGCTACGATTAGCATCCCGT
ACGTGACCG	Kr-Of-Er_synthetic	AGCTAGCGGCCCCACCCCGTAGCTACGGGATGCTAATCGTAGCTACGTGACCTTGAACGT
ACGTGATGT	Sr-Kf-Or-Ef_synthetic	AGCTACGAAACAATGAGCGTAGCTACGGGGTGGGGCCGCTAGCTACGATTAGCATCCCGTAGCTACGTTCAAGGTCACGT
ACGTGCCTC	Kr-Of-Sr-Ef_synthetic	AGCTAGCGGCCCCACCCCGTAGCTACGGGATGCTAATCGTAGCTACGAAACAATGAGCGTAGCTACGTTCAAGGTCACGT
ACGTGCTTG	Kf-Or-Ef_synthetic	AGCTACGGGGTGGGGCCGCTAGCTACGATTAGCATCCCGTAGCTACGTTCAAGGTCACGT
ACGTGGAAC	Or-Sr-Kr_synthetic	AGCTACGATTAGCATCCCGTAGCTACGAAACAATGAGCGTAGCTAGCGGCCCCACCCCGT
ACGTGGTAG	Basal
ACGTGGTCT	Of-Ef-Kr_synthetic	AGCTACGGGATGCTAATCGTAGCTACGTTCAAGGTCACGTAGCTAGCGGCCCCACCCCGT
ACGTGTGGT	Or-Kf-Sr_synthetic	AGCTACGATTAGCATCCCGTAGCTACGGGGTGGGGCCGCTAGCTACGAAACAATGAGCGT
ACGTTAAGA	Sf-Or-Kr-Ef_synthetic	AGCTACGCTCATTGTTTCGTAGCTACGATTAGCATCCCGTAGCTAGCGGCCCCACCCCGTAGCTACGTTCAAGGTCACGT
ACGTTCGAA	Kr-Er-Sr-Or_synthetic	AGCTAGCGGCCCCACCCCGTAGCTACGTGACCTTGAACGTAGCTACGAAACAATGAGCGTAGCTACGATTAGCATCCCGT
ACGTTCGTT	Er-Of-Sf_synthetic	AGCTACGTGACCTTGAACGTAGCTACGGGATGCTAATCGTAGCTACGCTCATTGTTTCGT
ACGTTCTCG	Kf-Sr_synthetic	AGCTACGGGGTGGGGCCGCTAGCTACGAAACAATGAGCGT
ACGTTCTTC	Of-Sr-Ef-Kr_synthetic	AGCTACGGGATGCTAATCGTAGCTACGAAACAATGAGCGTAGCTACGTTCAAGGTCACGTAGCTAGCGGCCCCACCCCGT
ACGTTGCCG	Sf-Kr-Ef_synthetic	AGCTACGCTCATTGTTTCGTAGCTAGCGGCCCCACCCCGTAGCTACGTTCAAGGTCACGT
ACGTTTGCT	Sf-Ef-Kr_synthetic	AGCTACGCTCATTGTTTCGTAGCTACGTTCAAGGTCACGTAGCTAGCGGCCCCACCCCGT
ACTAAACCG	Of-Sf-Kf-Er_synthetic	AGCTACGGGATGCTAATCGTAGCTACGCTCATTGTTTCGTAGCTACGGGGTGGGGCCGCTAGCTACGTGACCTTGAACGT
ACTAACCCA	Kr-Of-Er-Sr_synthetic	AGCTAGCGGCCCCACCCCGTAGCTACGGGATGCTAATCGTAGCTACGTGACCTTGAACGTAGCTACGAAACAATGAGCGT
ACTAAGCGA	Or-Kr-Ef_synthetic	AGCTACGATTAGCATCCCGTAGCTAGCGGCCCCACCCCGTAGCTACGTTCAAGGTCACGT
ACTAATCTG	Sf-Kr-Of_synthetic	AGCTACGCTCATTGTTTCGTAGCTAGCGGCCCCACCCCGTAGCTACGGGATGCTAATCGT
ACTACACTC	Kf-Of-Ef-Sf_synthetic	AGCTACGGGGTGGGGCCGCTAGCTACGGGATGCTAATCGTAGCTACGTTCAAGGTCACGTAGCTACGCTCATTGTTTCGT
ACTACAGTG	Basal
ACTACATCA	Sr-Er-Of-Kf_synthetic	AGCTACGAAACAATGAGCGTAGCTACGTGACCTTGAACGTAGCTACGGGATGCTAATCGTAGCTACGGGGTGGGGCCGCT
ACTACGAAC	Of-Kr-Er_synthetic	AGCTACGGGATGCTAATCGTAGCTAGCGGCCCCACCCCGTAGCTACGTGACCTTGAACGT
ACTACGATG	Or-Sr-Kf-Ef_synthetic	AGCTACGATTAGCATCCCGTAGCTACGAAACAATGAGCGTAGCTACGGGGTGGGGCCGCTAGCTACGTTCAAGGTCACGT
ACTACGCAG	Ef-Or-Kf_synthetic	AGCTACGTTCAAGGTCACGTAGCTACGATTAGCATCCCGTAGCTACGGGGTGGGGCCGCT
ACTACTTGA	Kf-Ef-Or-Sf_synthetic	AGCTACGGGGTGGGGCCGCTAGCTACGTTCAAGGTCACGTAGCTACGATTAGCATCCCGTAGCTACGCTCATTGTTTCGT
ACTAGAACT	Sr-Kr-Ef_synthetic	AGCTACGAAACAATGAGCGTAGCTAGCGGCCCCACCCCGTAGCTACGTTCAAGGTCACGT
ACTAGAGAG	Kr-Er-Of-Sr_synthetic	AGCTAGCGGCCCCACCCCGTAGCTACGTGACCTTGAACGTAGCTACGGGATGCTAATCGTAGCTACGAAACAATGAGCGT
ACTAGATCG	Kr-Er-Of-Sr_synthetic	AGCTAGCGGCCCCACCCCGTAGCTACGTGACCTTGAACGTAGCTACGGGATGCTAATCGTAGCTACGAAACAATGAGCGT
ACTAGCAAT	Er-Or-Sr-Kf_synthetic	AGCTACGTGACCTTGAACGTAGCTACGATTAGCATCCCGTAGCTACGAAACAATGAGCGTAGCTACGGGGTGGGGCCGCT
ACTAGCTGA	Of-Sr-Kr-Er_synthetic	AGCTACGGGATGCTAATCGTAGCTACGAAACAATGAGCGTAGCTAGCGGCCCCACCCCGTAGCTACGTGACCTTGAACGT
ACTAGTAAC	Or-Ef-Sr_synthetic	AGCTACGATTAGCATCCCGTAGCTACGTTCAAGGTCACGTAGCTACGAAACAATGAGCGT
ACTAGTCCC	Sf-Er-Kf-Or_synthetic	AGCTACGCTCATTGTTTCGTAGCTACGTGACCTTGAACGTAGCTACGGGGTGGGGCCGCTAGCTACGATTAGCATCCCGT
ACTAGTCTA	Kf-Of-Sf-Ef_synthetic	AGCTACGGGGTGGGGCCGCTAGCTACGGGATGCTAATCGTAGCTACGCTCATTGTTTCGTAGCTACGTTCAAGGTCACGT
ACTATCTTC	Of-Kr-Ef-Sf_synthetic	AGCTACGGGATGCTAATCGTAGCTAGCGGCCCCACCCCGTAGCTACGTTCAAGGTCACGTAGCTACGCTCATTGTTTCGT
ACTATGGCG	Ef-Kf-Sr-Of_synthetic	AGCTACGTTCAAGGTCACGTAGCTACGGGGTGGGGCCGCTAGCTACGAAACAATGAGCGTAGCTACGGGATGCTAATCGT
ACTCAACCA	Or-Er-Kr-Sf_synthetic	AGCTACGATTAGCATCCCGTAGCTACGTGACCTTGAACGTAGCTAGCGGCCCCACCCCGTAGCTACGCTCATTGTTTCGT
ACTCAAGGA	Ef-Sr-Of_synthetic	AGCTACGTTCAAGGTCACGTAGCTACGAAACAATGAGCGTAGCTACGGGATGCTAATCGT
ACTCACAGC	Ef-Sf-Or-Kf_synthetic	AGCTACGTTCAAGGTCACGTAGCTACGCTCATTGTTTCGTAGCTACGATTAGCATCCCGTAGCTACGGGGTGGGGCCGCT
ACTCACGCA	Sr-Kf-Ef_synthetic	AGCTACGAAACAATGAGCGTAGCTACGGGGTGGGGCCGCTAGCTACGTTCAAGGTCACGT
ACTCACTTG	Sf-Kr-Or-Er_synthetic	AGCTACGCTCATTGTTTCGTAGCTAGCGGCCCCACCCCGTAGCTACGATTAGCATCCCGTAGCTACGTGACCTTGAACGT
ACTCAGAAT	Ef-Kr-Or_synthetic	AGCTACGTTCAAGGTCACGTAGCTAGCGGCCCCACCCCGTAGCTACGATTAGCATCCCGT
ACTCAGTTC	Or-Kf_synthetic	AGCTACGATTAGCATCCCGTAGCTACGGGGTGGGGCCGCT
ACTCCACAG	Ef-Kf-Sr_synthetic	AGCTACGTTCAAGGTCACGTAGCTACGGGGTGGGGCCGCTAGCTACGAAACAATGAGCGT
ACTCCATCC	Of-Sr-Er-Kr_synthetic	AGCTACGGGATGCTAATCGTAGCTACGAAACAATGAGCGTAGCTACGTGACCTTGAACGTAGCTAGCGGCCCCACCCCGT
ACTCCATTA	Kr-Sr-Or-Ef_synthetic	AGCTAGCGGCCCCACCCCGTAGCTACGAAACAATGAGCGTAGCTACGATTAGCATCCCGTAGCTACGTTCAAGGTCACGT
ACTCCGCTA	Or-Kr-Sr-Er_synthetic	AGCTACGATTAGCATCCCGTAGCTAGCGGCCCCACCCCGTAGCTACGAAACAATGAGCGTAGCTACGTGACCTTGAACGT
ACTCCGGTG	Er-Kf-Sf-Of_synthetic	AGCTACGTGACCTTGAACGTAGCTACGGGGTGGGGCCGCTAGCTACGCTCATTGTTTCGTAGCTACGGGATGCTAATCGT
ACTCCTAAC	Kr-Sr-Ef_synthetic	AGCTAGCGGCCCCACCCCGTAGCTACGAAACAATGAGCGTAGCTACGTTCAAGGTCACGT
ACTCCTGTT	Kr-Ef-Of-Sf_synthetic	AGCTAGCGGCCCCACCCCGTAGCTACGTTCAAGGTCACGTAGCTACGGGATGCTAATCGTAGCTACGCTCATTGTTTCGT
ACTCGAACG	Ef-Sf-Or-Kf_synthetic	AGCTACGTTCAAGGTCACGTAGCTACGCTCATTGTTTCGTAGCTACGATTAGCATCCCGTAGCTACGGGGTGGGGCCGCT
ACTCGACAA	Of-Sf-Kr-Er_synthetic	AGCTACGGGATGCTAATCGTAGCTACGCTCATTGTTTCGTAGCTAGCGGCCCCACCCCGTAGCTACGTGACCTTGAACGT
ACTCGCACT	Kr-Or-Sf_synthetic	AGCTAGCGGCCCCACCCCGTAGCTACGATTAGCATCCCGTAGCTACGCTCATTGTTTCGT
ACTCGCATC	Er-Or-Sf-Kr_synthetic	AGCTACGTGACCTTGAACGTAGCTACGATTAGCATCCCGTAGCTACGCTCATTGTTTCGTAGCTAGCGGCCCCACCCCGT
ACTCGGTCC	Sr-Or_synthetic	AGCTACGAAACAATGAGCGTAGCTACGATTAGCATCCCGT
ACTCGGTTA	Sf-Or-Kr-Er_synthetic	AGCTACGCTCATTGTTTCGTAGCTACGATTAGCATCCCGTAGCTAGCGGCCCCACCCCGTAGCTACGTGACCTTGAACGT
ACTCGTAAA	Ef-Kf-Sr_synthetic	AGCTACGTTCAAGGTCACGTAGCTACGGGGTGGGGCCGCTAGCTACGAAACAATGAGCGT
ACTCGTCCG	Kr-Sf-Ef-Or_synthetic	AGCTAGCGGCCCCACCCCGTAGCTACGCTCATTGTTTCGTAGCTACGTTCAAGGTCACGTAGCTACGATTAGCATCCCGT
ACTCTAACA	Ef-Kf-Sf_synthetic	AGCTACGTTCAAGGTCACGTAGCTACGGGGTGGGGCCGCTAGCTACGCTCATTGTTTCGT
ACTCTAATC	Kr-Ef-Of-Sr_synthetic	AGCTAGCGGCCCCACCCCGTAGCTACGTTCAAGGTCACGTAGCTACGGGATGCTAATCGTAGCTACGAAACAATGAGCGT
ACTCTACAT	Er-Kr-Of-Sr_synthetic	AGCTACGTGACCTTGAACGTAGCTAGCGGCCCCACCCCGTAGCTACGGGATGCTAATCGTAGCTACGAAACAATGAGCGT
ACTCTCCTG	Ef-Sf-Or-Kr_synthetic	AGCTACGTTCAAGGTCACGTAGCTACGCTCATTGTTTCGTAGCTACGATTAGCATCCCGTAGCTAGCGGCCCCACCCCGT
ACTCTCGTC	Of-Er-Kf_synthetic	AGCTACGGGATGCTAATCGTAGCTACGTGACCTTGAACGTAGCTACGGGGTGGGGCCGCT
ACTCTGGAG	Ef-Kf-Sf_synthetic	AGCTACGTTCAAGGTCACGTAGCTACGGGGTGGGGCCGCTAGCTACGCTCATTGTTTCGT
ACTCTGTTG	Er-Sf-Of_synthetic	AGCTACGTGACCTTGAACGTAGCTACGCTCATTGTTTCGTAGCTACGGGATGCTAATCGT
ACTGAACAC	Ef-Kf-Of-Sf_synthetic	AGCTACGTTCAAGGTCACGTAGCTACGGGGTGGGGCCGCTAGCTACGGGATGCTAATCGTAGCTACGCTCATTGTTTCGT
ACTGACAGG	Er-Kr-Sf_synthetic	AGCTACGTGACCTTGAACGTAGCTAGCGGCCCCACCCCGTAGCTACGCTCATTGTTTCGT
ACTGACGAT	Of-Sr-Er-Kf_synthetic	AGCTACGGGATGCTAATCGTAGCTACGAAACAATGAGCGTAGCTACGTGACCTTGAACGTAGCTACGGGGTGGGGCCGCT
ACTGAGATA	Sf-Kr-Er-Of_synthetic	AGCTACGCTCATTGTTTCGTAGCTAGCGGCCCCACCCCGTAGCTACGTGACCTTGAACGTAGCTACGGGATGCTAATCGT
ACTGAGCGT	Sr-Or-Er-Kf_synthetic	AGCTACGAAACAATGAGCGTAGCTACGATTAGCATCCCGTAGCTACGTGACCTTGAACGTAGCTACGGGGTGGGGCCGCT
ACTGATGCG	Sr-Ef-Kf-Of_synthetic	AGCTACGAAACAATGAGCGTAGCTACGTTCAAGGTCACGTAGCTACGGGGTGGGGCCGCTAGCTACGGGATGCTAATCGT
ACTGCAAAT	Ef-Or-Sr-Kr_synthetic	AGCTACGTTCAAGGTCACGTAGCTACGATTAGCATCCCGTAGCTACGAAACAATGAGCGTAGCTAGCGGCCCCACCCCGT
ACTGCAACC	Kr-Sr-Er-Or_synthetic	AGCTAGCGGCCCCACCCCGTAGCTACGAAACAATGAGCGTAGCTACGTGACCTTGAACGTAGCTACGATTAGCATCCCGT
ACTGCAGTC	Of-Er-Kf_synthetic	AGCTACGGGATGCTAATCGTAGCTACGTGACCTTGAACGTAGCTACGGGGTGGGGCCGCT
ACTGCCCAT	Er-Or-Sf-Kf_synthetic	AGCTACGTGACCTTGAACGTAGCTACGATTAGCATCCCGTAGCTACGCTCATTGTTTCGTAGCTACGGGGTGGGGCCGCT
ACTGCGCCA	Or-Sr-Kf_synthetic	AGCTACGATTAGCATCCCGTAGCTACGAAACAATGAGCGTAGCTACGGGGTGGGGCCGCT
ACTGCTCAC	Sf-Or-Er-Kr_synthetic	AGCTACGCTCATTGTTTCGTAGCTACGATTAGCATCCCGTAGCTACGTGACCTTGAACGTAGCTAGCGGCCCCACCCCGT
ACTGGAAAC	Kf-Sr-Of_synthetic	AGCTACGGGGTGGGGCCGCTAGCTACGAAACAATGAGCGTAGCTACGGGATGCTAATCGT
ACTGGATCA	Of-Er-Sf_synthetic	AGCTACGGGATGCTAATCGTAGCTACGTGACCTTGAACGTAGCTACGCTCATTGTTTCGT
ACTGGCGGA	OfOrOfOr_CMF-Scalar	AGCTACGGGATGCTAATCGTAGCTACGATTAGCATCCCGTAGCTACGGGATGCTAATCGTAGCTACGATTAGCATCCCGT
ACTGGCGTG	Sr-Kf-Er-Of_synthetic	AGCTACGAAACAATGAGCGTAGCTACGGGGTGGGGCCGCTAGCTACGTGACCTTGAACGTAGCTACGGGATGCTAATCGT
ACTGGGTGC	Of-Kf-Er_synthetic	AGCTACGGGATGCTAATCGTAGCTACGGGGTGGGGCCGCTAGCTACGTGACCTTGAACGT
ACTGTAACG	Kf-Ef-Of_synthetic	AGCTACGGGGTGGGGCCGCTAGCTACGTTCAAGGTCACGTAGCTACGGGATGCTAATCGT
ACTGTACAG	Er-Sr-Kr-Of_synthetic	AGCTACGTGACCTTGAACGTAGCTACGAAACAATGAGCGTAGCTAGCGGCCCCACCCCGTAGCTACGGGATGCTAATCGT
ACTGTACTA	Of-Sr-Er-Kr_synthetic	AGCTACGGGATGCTAATCGTAGCTACGAAACAATGAGCGTAGCTACGTGACCTTGAACGTAGCTAGCGGCCCCACCCCGT
ACTGTGAAC	Er-Sr-Or_synthetic	AGCTACGTGACCTTGAACGTAGCTACGAAACAATGAGCGTAGCTACGATTAGCATCCCGT
ACTGTGCCT	Sr-Kf-Er-Of_synthetic	AGCTACGAAACAATGAGCGTAGCTACGGGGTGGGGCCGCTAGCTACGTGACCTTGAACGTAGCTACGGGATGCTAATCGT
ACTGTGGAA	Kf-Ef-Of-Sr_synthetic	AGCTACGGGGTGGGGCCGCTAGCTACGTTCAAGGTCACGTAGCTACGGGATGCTAATCGTAGCTACGAAACAATGAGCGT
ACTTACGGG	Kr-Ef-Sf-Of_synthetic	AGCTAGCGGCCCCACCCCGTAGCTACGTTCAAGGTCACGTAGCTACGCTCATTGTTTCGTAGCTACGGGATGCTAATCGT
ACTTACTAC	Or-Kr-Sr-Ef_synthetic	AGCTACGATTAGCATCCCGTAGCTAGCGGCCCCACCCCGTAGCTACGAAACAATGAGCGTAGCTACGTTCAAGGTCACGT
ACTTAGCTC	Or-Sr-Kf-Ef_synthetic	AGCTACGATTAGCATCCCGTAGCTACGAAACAATGAGCGTAGCTACGGGGTGGGGCCGCTAGCTACGTTCAAGGTCACGT
ACTTAGGAT	Sf-Or-Ef-Kf_synthetic	AGCTACGCTCATTGTTTCGTAGCTACGATTAGCATCCCGTAGCTACGTTCAAGGTCACGTAGCTACGGGGTGGGGCCGCT
ACTTAGGTG	Sr-Ef-Kr_synthetic	AGCTACGAAACAATGAGCGTAGCTACGTTCAAGGTCACGTAGCTAGCGGCCCCACCCCGT
ACTTATACC	Kf-Sf-Of-Er_synthetic	AGCTACGGGGTGGGGCCGCTAGCTACGCTCATTGTTTCGTAGCTACGGGATGCTAATCGTAGCTACGTGACCTTGAACGT
ACTTCACCA	Kf-Sr-Or-Er_synthetic	AGCTACGGGGTGGGGCCGCTAGCTACGAAACAATGAGCGTAGCTACGATTAGCATCCCGTAGCTACGTGACCTTGAACGT
ACTTCATAG	Sf-Kr-Er-Of_synthetic	AGCTACGCTCATTGTTTCGTAGCTAGCGGCCCCACCCCGTAGCTACGTGACCTTGAACGTAGCTACGGGATGCTAATCGT
ACTTCATTC	Sf-Kr-Ef-Or_synthetic	AGCTACGCTCATTGTTTCGTAGCTAGCGGCCCCACCCCGTAGCTACGTTCAAGGTCACGTAGCTACGATTAGCATCCCGT
ACTTCCGAG	Or-Sf-Er-Kr_synthetic	AGCTACGATTAGCATCCCGTAGCTACGCTCATTGTTTCGTAGCTACGTGACCTTGAACGTAGCTAGCGGCCCCACCCCGT
ACTTCCGTT	Kf-Of-Ef_synthetic	AGCTACGGGGTGGGGCCGCTAGCTACGGGATGCTAATCGTAGCTACGTTCAAGGTCACGT
ACTTCCTCG	Kr-Or-Sr_synthetic	AGCTAGCGGCCCCACCCCGTAGCTACGATTAGCATCCCGTAGCTACGAAACAATGAGCGT
ACTTCGCGG	Sf-Of-Kr-Ef_synthetic	AGCTACGCTCATTGTTTCGTAGCTACGGGATGCTAATCGTAGCTAGCGGCCCCACCCCGTAGCTACGTTCAAGGTCACGT
ACTTGAGGC	Sr-Er-Kr_synthetic	AGCTACGAAACAATGAGCGTAGCTACGTGACCTTGAACGTAGCTAGCGGCCCCACCCCGT
ACTTGCCAG	Basal
ACTTGCCTA	Kf-Or-Er-Sf_synthetic	AGCTACGGGGTGGGGCCGCTAGCTACGATTAGCATCCCGTAGCTACGTGACCTTGAACGTAGCTACGCTCATTGTTTCGT
ACTTGCGTC	Kf-Of-Er-Sf_synthetic	AGCTACGGGGTGGGGCCGCTAGCTACGGGATGCTAATCGTAGCTACGTGACCTTGAACGTAGCTACGCTCATTGTTTCGT
ACTTGGCTT	Ef-Sf-Of-Kf_synthetic	AGCTACGTTCAAGGTCACGTAGCTACGCTCATTGTTTCGTAGCTACGGGATGCTAATCGTAGCTACGGGGTGGGGCCGCT
ACTTGGGAC	Kf-Ef-Sf-Of_synthetic	AGCTACGGGGTGGGGCCGCTAGCTACGTTCAAGGTCACGTAGCTACGCTCATTGTTTCGTAGCTACGGGATGCTAATCGT
ACTTTACGA	Kr-Sf-Or-Er_synthetic	AGCTAGCGGCCCCACCCCGTAGCTACGCTCATTGTTTCGTAGCTACGATTAGCATCCCGTAGCTACGTGACCTTGAACGT
ACTTTACTC	Kf-Sf-Of_synthetic	AGCTACGGGGTGGGGCCGCTAGCTACGCTCATTGTTTCGTAGCTACGGGATGCTAATCGT
ACTTTCTCC	Of-Sf-Kr_synthetic	AGCTACGGGATGCTAATCGTAGCTACGCTCATTGTTTCGTAGCTAGCGGCCCCACCCCGT
ACTTTCTTG	Sf-Of-Kf-Ef_synthetic	AGCTACGCTCATTGTTTCGTAGCTACGGGATGCTAATCGTAGCTACGGGGTGGGGCCGCTAGCTACGTTCAAGGTCACGT
ACTTTGAGG	Er-Or-Sr_synthetic	AGCTACGTGACCTTGAACGTAGCTACGATTAGCATCCCGTAGCTACGAAACAATGAGCGT
AGAAACCGA	Kf-Of-Er_synthetic	AGCTACGGGGTGGGGCCGCTAGCTACGGGATGCTAATCGTAGCTACGTGACCTTGAACGT
AGAAACCTT	Of-Kf-Er-Sf_synthetic	AGCTACGGGATGCTAATCGTAGCTACGGGGTGGGGCCGCTAGCTACGTGACCTTGAACGTAGCTACGCTCATTGTTTCGT
AGAAAGACA	Ef-Kf-Sr-Of_synthetic	AGCTACGTTCAAGGTCACGTAGCTACGGGGTGGGGCCGCTAGCTACGAAACAATGAGCGTAGCTACGGGATGCTAATCGT
AGAAAGCGG	Kf-Er-Of-Sf_synthetic	AGCTACGGGGTGGGGCCGCTAGCTACGTGACCTTGAACGTAGCTACGGGATGCTAATCGTAGCTACGCTCATTGTTTCGT
AGAAAGGGT	Er-Kr_synthetic	AGCTACGTGACCTTGAACGTAGCTAGCGGCCCCACCCCGT
AGAAAGTAG	Of-Kr-Sf_synthetic	AGCTACGGGATGCTAATCGTAGCTAGCGGCCCCACCCCGTAGCTACGCTCATTGTTTCGT
AGAAATGGG	Of-Er-Sr_synthetic	AGCTACGGGATGCTAATCGTAGCTACGTGACCTTGAACGTAGCTACGAAACAATGAGCGT
AGAAATTCG	Er-Of-Sf-Kr_synthetic	AGCTACGTGACCTTGAACGTAGCTACGGGATGCTAATCGTAGCTACGCTCATTGTTTCGTAGCTAGCGGCCCCACCCCGT
AGAACACTG	Ef-Kf-Of-Sr_synthetic	AGCTACGTTCAAGGTCACGTAGCTACGGGGTGGGGCCGCTAGCTACGGGATGCTAATCGTAGCTACGAAACAATGAGCGT
AGAACCATT	Sr-Ef-Of-Kr_synthetic	AGCTACGAAACAATGAGCGTAGCTACGTTCAAGGTCACGTAGCTACGGGATGCTAATCGTAGCTAGCGGCCCCACCCCGT
AGAACGCCC	Of-Sr-Er_synthetic	AGCTACGGGATGCTAATCGTAGCTACGAAACAATGAGCGTAGCTACGTGACCTTGAACGT
AGAACGCTT	Of-Sf-Er-Kf_synthetic	AGCTACGGGATGCTAATCGTAGCTACGCTCATTGTTTCGTAGCTACGTGACCTTGAACGTAGCTACGGGGTGGGGCCGCT
AGAACTAGA	Sr-Of-Ef-Kf_synthetic	AGCTACGAAACAATGAGCGTAGCTACGGGATGCTAATCGTAGCTACGTTCAAGGTCACGTAGCTACGGGGTGGGGCCGCT
AGAAGAACT	Sr-Or-Er-Kf_synthetic	AGCTACGAAACAATGAGCGTAGCTACGATTAGCATCCCGTAGCTACGTGACCTTGAACGTAGCTACGGGGTGGGGCCGCT
AGAAGCCTC	Of-Kr-Sf-Ef_synthetic	AGCTACGGGATGCTAATCGTAGCTAGCGGCCCCACCCCGTAGCTACGCTCATTGTTTCGTAGCTACGTTCAAGGTCACGT
AGAAGGAGT	Er-Sr-Or-Kr_synthetic	AGCTACGTGACCTTGAACGTAGCTACGAAACAATGAGCGTAGCTACGATTAGCATCCCGTAGCTAGCGGCCCCACCCCGT
AGAAGTACA	Or-Kf-Ef-Sf_synthetic	AGCTACGATTAGCATCCCGTAGCTACGGGGTGGGGCCGCTAGCTACGTTCAAGGTCACGTAGCTACGCTCATTGTTTCGT
AGAAGTCAG	Kr-Or-Ef-Sr_synthetic	AGCTAGCGGCCCCACCCCGTAGCTACGATTAGCATCCCGTAGCTACGTTCAAGGTCACGTAGCTACGAAACAATGAGCGT
AGAATCGGT	Er-Kf-Sf-Or_synthetic	AGCTACGTGACCTTGAACGTAGCTACGGGGTGGGGCCGCTAGCTACGCTCATTGTTTCGTAGCTACGATTAGCATCCCGT
AGAATCTGG	Ef-Sr-Kf-Of_synthetic	AGCTACGTTCAAGGTCACGTAGCTACGAAACAATGAGCGTAGCTACGGGGTGGGGCCGCTAGCTACGGGATGCTAATCGT
AGAATGTGT	Of-Ef-Sf-Kf_synthetic	AGCTACGGGATGCTAATCGTAGCTACGTTCAAGGTCACGTAGCTACGCTCATTGTTTCGTAGCTACGGGGTGGGGCCGCT
AGAATTTCC	Or-Kf-Ef-Sf_synthetic	AGCTACGATTAGCATCCCGTAGCTACGGGGTGGGGCCGCTAGCTACGTTCAAGGTCACGTAGCTACGCTCATTGTTTCGT
AGACAACGG	Kf-Sf-Er-Of_synthetic	AGCTACGGGGTGGGGCCGCTAGCTACGCTCATTGTTTCGTAGCTACGTGACCTTGAACGTAGCTACGGGATGCTAATCGT
AGACAAGGA	Ef-Of-Kf_synthetic	AGCTACGTTCAAGGTCACGTAGCTACGGGATGCTAATCGTAGCTACGGGGTGGGGCCGCT
AGACAATAG	Er-Sr-Kr-Of_synthetic	AGCTACGTGACCTTGAACGTAGCTACGAAACAATGAGCGTAGCTAGCGGCCCCACCCCGTAGCTACGGGATGCTAATCGT
AGACAGAGA	Sr-Ef-Or-Kf_synthetic	AGCTACGAAACAATGAGCGTAGCTACGTTCAAGGTCACGTAGCTACGATTAGCATCCCGTAGCTACGGGGTGGGGCCGCT
AGACAGTAT	Kf-Ef-Of-Sr_synthetic	AGCTACGGGGTGGGGCCGCTAGCTACGTTCAAGGTCACGTAGCTACGGGATGCTAATCGTAGCTACGAAACAATGAGCGT
AGACATACC	Ef-Kf-Sf-Of_synthetic	AGCTACGTTCAAGGTCACGTAGCTACGGGGTGGGGCCGCTAGCTACGCTCATTGTTTCGTAGCTACGGGATGCTAATCGT
AGACCATCT	Ef-Kr-Sr_synthetic	AGCTACGTTCAAGGTCACGTAGCTAGCGGCCCCACCCCGTAGCTACGAAACAATGAGCGT
AGACCCAAC	Sf-Or-Kr-Ef_synthetic	AGCTACGCTCATTGTTTCGTAGCTACGATTAGCATCCCGTAGCTAGCGGCCCCACCCCGTAGCTACGTTCAAGGTCACGT
AGACCCGTT	Or-Kf-Sr_synthetic	AGCTACGATTAGCATCCCGTAGCTACGGGGTGGGGCCGCTAGCTACGAAACAATGAGCGT
AGACCCTGG	Or-Kf-Sr_synthetic	AGCTACGATTAGCATCCCGTAGCTACGGGGTGGGGCCGCTAGCTACGAAACAATGAGCGT
AGACCGCAC	Kf-Sf-Ef-Or_synthetic	AGCTACGGGGTGGGGCCGCTAGCTACGCTCATTGTTTCGTAGCTACGTTCAAGGTCACGTAGCTACGATTAGCATCCCGT
AGACCTCAG	Kr-Sr_synthetic	AGCTAGCGGCCCCACCCCGTAGCTACGAAACAATGAGCGT
AGACCTCTA	Er-Of-Sr_synthetic	AGCTACGTGACCTTGAACGTAGCTACGGGATGCTAATCGTAGCTACGAAACAATGAGCGT
AGACCTTAT	Of-Sr_synthetic	AGCTACGGGATGCTAATCGTAGCTACGAAACAATGAGCGT
AGACGAAAG	Or-Er-Sf-Kf_synthetic	AGCTACGATTAGCATCCCGTAGCTACGTGACCTTGAACGTAGCTACGCTCATTGTTTCGTAGCTACGGGGTGGGGCCGCT
AGACGCCTA	Of-Kr-Ef-Sr_synthetic	AGCTACGGGATGCTAATCGTAGCTAGCGGCCCCACCCCGTAGCTACGTTCAAGGTCACGTAGCTACGAAACAATGAGCGT
AGACGCGTG	Ef-Sf-Kr-Or_synthetic	AGCTACGTTCAAGGTCACGTAGCTACGCTCATTGTTTCGTAGCTAGCGGCCCCACCCCGTAGCTACGATTAGCATCCCGT
AGACGCTGT	OfOrOfOr_CMF-Scalar	AGCTACGGGATGCTAATCGTAGCTACGATTAGCATCCCGTAGCTACGGGATGCTAATCGTAGCTACGATTAGCATCCCGT
AGACGGACG	Er-Sr-Kr_synthetic	AGCTACGTGACCTTGAACGTAGCTACGAAACAATGAGCGTAGCTAGCGGCCCCACCCCGT
AGACGGCAG	Er-Kf-Sr-Of_synthetic	AGCTACGTGACCTTGAACGTAGCTACGGGGTGGGGCCGCTAGCTACGAAACAATGAGCGTAGCTACGGGATGCTAATCGT
AGACGGCTT	Sr-Ef-Kr-Or_synthetic	AGCTACGAAACAATGAGCGTAGCTACGTTCAAGGTCACGTAGCTAGCGGCCCCACCCCGTAGCTACGATTAGCATCCCGT
AGACGGTCT	Kf-Er-Sr_synthetic	AGCTACGGGGTGGGGCCGCTAGCTACGTGACCTTGAACGTAGCTACGAAACAATGAGCGT
AGACGGTTC	Of-Sf-Kf-Er_synthetic	AGCTACGGGATGCTAATCGTAGCTACGCTCATTGTTTCGTAGCTACGGGGTGGGGCCGCTAGCTACGTGACCTTGAACGT
AGACGTCCC	Er-Of-Sf-Kr_synthetic	AGCTACGTGACCTTGAACGTAGCTACGGGATGCTAATCGTAGCTACGCTCATTGTTTCGTAGCTAGCGGCCCCACCCCGT
AGACGTTTG	Or-Ef-Kr_synthetic	AGCTACGATTAGCATCCCGTAGCTACGTTCAAGGTCACGTAGCTAGCGGCCCCACCCCGT
AGACTACAT	Sr-Of-Ef_synthetic	AGCTACGAAACAATGAGCGTAGCTACGGGATGCTAATCGTAGCTACGTTCAAGGTCACGT
AGACTCGTC	Or-Kr-Sf-Ef_synthetic	AGCTACGATTAGCATCCCGTAGCTAGCGGCCCCACCCCGTAGCTACGCTCATTGTTTCGTAGCTACGTTCAAGGTCACGT
AGACTGAAG	Or-Kf-Er_synthetic	AGCTACGATTAGCATCCCGTAGCTACGGGGTGGGGCCGCTAGCTACGTGACCTTGAACGT
AGACTGATC	Sr-Of_synthetic	AGCTACGAAACAATGAGCGTAGCTACGGGATGCTAATCGT
AGACTGCGG	Kr-Of-Ef-Sr_synthetic	AGCTAGCGGCCCCACCCCGTAGCTACGGGATGCTAATCGTAGCTACGTTCAAGGTCACGTAGCTACGAAACAATGAGCGT
AGACTGTGA	Kf-Sr-Or-Ef_synthetic	AGCTACGGGGTGGGGCCGCTAGCTACGAAACAATGAGCGTAGCTACGATTAGCATCCCGTAGCTACGTTCAAGGTCACGT
AGAGAACGA	Sf-Ef-Kf-Or_synthetic	AGCTACGCTCATTGTTTCGTAGCTACGTTCAAGGTCACGTAGCTACGGGGTGGGGCCGCTAGCTACGATTAGCATCCCGT
AGAGAAGGG	Kf-Or-Er_synthetic	AGCTACGGGGTGGGGCCGCTAGCTACGATTAGCATCCCGTAGCTACGTGACCTTGAACGT
AGAGAGATT	Er-Sf-Or-Kf_synthetic	AGCTACGTGACCTTGAACGTAGCTACGCTCATTGTTTCGTAGCTACGATTAGCATCCCGTAGCTACGGGGTGGGGCCGCT
AGAGAGGAA	Sr-Kf-Of-Ef_synthetic	AGCTACGAAACAATGAGCGTAGCTACGGGGTGGGGCCGCTAGCTACGGGATGCTAATCGTAGCTACGTTCAAGGTCACGT
AGAGATAAC	Or-Ef-Kr_synthetic	AGCTACGATTAGCATCCCGTAGCTACGTTCAAGGTCACGTAGCTAGCGGCCCCACCCCGT
AGAGATCGT	Of-Sf-Kf_synthetic	AGCTACGGGATGCTAATCGTAGCTACGCTCATTGTTTCGTAGCTACGGGGTGGGGCCGCT
AGAGATTGG	Sr-Ef-Of-Kr_synthetic	AGCTACGAAACAATGAGCGTAGCTACGTTCAAGGTCACGTAGCTACGGGATGCTAATCGTAGCTAGCGGCCCCACCCCGT
AGAGCAACT	Er-Sr-Of-Kr_synthetic	AGCTACGTGACCTTGAACGTAGCTACGAAACAATGAGCGTAGCTACGGGATGCTAATCGTAGCTAGCGGCCCCACCCCGT
AGAGCATGA	Sf-Ef-Kf_synthetic	AGCTACGCTCATTGTTTCGTAGCTACGTTCAAGGTCACGTAGCTACGGGGTGGGGCCGCT
AGAGCCGAT	Ef-Sf-Kf_synthetic	AGCTACGTTCAAGGTCACGTAGCTACGCTCATTGTTTCGTAGCTACGGGGTGGGGCCGCT
AGAGCGGGA	Kf-Ef-Sf-Or_synthetic	AGCTACGGGGTGGGGCCGCTAGCTACGTTCAAGGTCACGTAGCTACGCTCATTGTTTCGTAGCTACGATTAGCATCCCGT
AGAGCTAGC	Ef-Sf-Kf-Or_synthetic	AGCTACGTTCAAGGTCACGTAGCTACGCTCATTGTTTCGTAGCTACGGGGTGGGGCCGCTAGCTACGATTAGCATCCCGT
AGAGCTTTG	Sf-Ef-Kr_synthetic	AGCTACGCTCATTGTTTCGTAGCTACGTTCAAGGTCACGTAGCTAGCGGCCCCACCCCGT
AGAGGATAT	Or-Kr-Ef-Sr_synthetic	AGCTACGATTAGCATCCCGTAGCTAGCGGCCCCACCCCGTAGCTACGTTCAAGGTCACGTAGCTACGAAACAATGAGCGT
AGAGGCGGA	Kf-Ef-Or_synthetic	AGCTACGGGGTGGGGCCGCTAGCTACGTTCAAGGTCACGTAGCTACGATTAGCATCCCGT
AGAGGCTTG	Basal
AGAGGGCTA	Er-Kr-Sr_synthetic	AGCTACGTGACCTTGAACGTAGCTAGCGGCCCCACCCCGTAGCTACGAAACAATGAGCGT
AGAGGGTGG	Kr-Of-Er-Sf_synthetic	AGCTAGCGGCCCCACCCCGTAGCTACGGGATGCTAATCGTAGCTACGTGACCTTGAACGTAGCTACGCTCATTGTTTCGT
AGAGTAAAG	Or-Er-Sf-Kr_synthetic	AGCTACGATTAGCATCCCGTAGCTACGTGACCTTGAACGTAGCTACGCTCATTGTTTCGTAGCTAGCGGCCCCACCCCGT
AGAGTACAC	Kr-Ef-Sr_synthetic	AGCTAGCGGCCCCACCCCGTAGCTACGTTCAAGGTCACGTAGCTACGAAACAATGAGCGT
AGAGTCGTA	Kr-Of-Sr_synthetic	AGCTAGCGGCCCCACCCCGTAGCTACGGGATGCTAATCGTAGCTACGAAACAATGAGCGT
AGAGTCTTC	Er-Sr-Kf-Or_synthetic	AGCTACGTGACCTTGAACGTAGCTACGAAACAATGAGCGTAGCTACGGGGTGGGGCCGCTAGCTACGATTAGCATCCCGT
AGAGTTGTC	Ef-Sr_synthetic	AGCTACGTTCAAGGTCACGTAGCTACGAAACAATGAGCGT
AGATAGCTA	Of-Ef-Sf-Kf_synthetic	AGCTACGGGATGCTAATCGTAGCTACGTTCAAGGTCACGTAGCTACGCTCATTGTTTCGTAGCTACGGGGTGGGGCCGCT
AGATAGGCA	Basal
AGATCCGGT	Of-Er-Sr_synthetic	AGCTACGGGATGCTAATCGTAGCTACGTGACCTTGAACGTAGCTACGAAACAATGAGCGT
AGATCGCAG	Er-Sf-Or-Kr_synthetic	AGCTACGTGACCTTGAACGTAGCTACGCTCATTGTTTCGTAGCTACGATTAGCATCCCGTAGCTAGCGGCCCCACCCCGT
AGATCGGTC	Kr-Of-Sf-Er_synthetic	AGCTAGCGGCCCCACCCCGTAGCTACGGGATGCTAATCGTAGCTACGCTCATTGTTTCGTAGCTACGTGACCTTGAACGT
AGATGACTC	Ef-Of-Kf_synthetic	AGCTACGTTCAAGGTCACGTAGCTACGGGATGCTAATCGTAGCTACGGGGTGGGGCCGCT
AGATGATGA	Sf-Kr-Or-Er_synthetic	AGCTACGCTCATTGTTTCGTAGCTAGCGGCCCCACCCCGTAGCTACGATTAGCATCCCGTAGCTACGTGACCTTGAACGT
AGATGGCCT	Kr-Er-Or-Sr_synthetic	AGCTAGCGGCCCCACCCCGTAGCTACGTGACCTTGAACGTAGCTACGATTAGCATCCCGTAGCTACGAAACAATGAGCGT
AGATGGTCG	Er-Kr-Or-Sf_synthetic	AGCTACGTGACCTTGAACGTAGCTAGCGGCCCCACCCCGTAGCTACGATTAGCATCCCGTAGCTACGCTCATTGTTTCGT
AGATTATGG	Sr-Ef-Kf-Of_synthetic	AGCTACGAAACAATGAGCGTAGCTACGTTCAAGGTCACGTAGCTACGGGGTGGGGCCGCTAGCTACGGGATGCTAATCGT
AGATTCCAG	Or-Sr-Er-Kf_synthetic	AGCTACGATTAGCATCCCGTAGCTACGAAACAATGAGCGTAGCTACGTGACCTTGAACGTAGCTACGGGGTGGGGCCGCT
AGATTGCGC	Sf-Ef-Of_synthetic	AGCTACGCTCATTGTTTCGTAGCTACGTTCAAGGTCACGTAGCTACGGGATGCTAATCGT
AGCAACATA	Ef-Sr-Kf-Or_synthetic	AGCTACGTTCAAGGTCACGTAGCTACGAAACAATGAGCGTAGCTACGGGGTGGGGCCGCTAGCTACGATTAGCATCCCGT
AGCAACGCT	Ef-Sr-Kf_synthetic	AGCTACGTTCAAGGTCACGTAGCTACGAAACAATGAGCGTAGCTACGGGGTGGGGCCGCT
AGCAACTAC	Ef-Sr-Kf_synthetic	AGCTACGTTCAAGGTCACGTAGCTACGAAACAATGAGCGTAGCTACGGGGTGGGGCCGCT
AGCAAGGAG	Kf-Er-Of_synthetic	AGCTACGGGGTGGGGCCGCTAGCTACGTGACCTTGAACGTAGCTACGGGATGCTAATCGT
AGCAATGTC	Of-Ef-Sr_synthetic	AGCTACGGGATGCTAATCGTAGCTACGTTCAAGGTCACGTAGCTACGAAACAATGAGCGT
AGCACCAAT	Of-Er-Kf-Sr_synthetic	AGCTACGGGATGCTAATCGTAGCTACGTGACCTTGAACGTAGCTACGGGGTGGGGCCGCTAGCTACGAAACAATGAGCGT
AGCACCGGT	Of-Ef-Kf-Sf_synthetic	AGCTACGGGATGCTAATCGTAGCTACGTTCAAGGTCACGTAGCTACGGGGTGGGGCCGCTAGCTACGCTCATTGTTTCGT
AGCACTAGG	Of-Kf-Sf-Ef_synthetic	AGCTACGGGATGCTAATCGTAGCTACGGGGTGGGGCCGCTAGCTACGCTCATTGTTTCGTAGCTACGTTCAAGGTCACGT
AGCACTTAA	Sr-Or-Kf-Er_synthetic	AGCTACGAAACAATGAGCGTAGCTACGATTAGCATCCCGTAGCTACGGGGTGGGGCCGCTAGCTACGTGACCTTGAACGT
AGCAGACGC	Sr-Ef-Or-Kr_synthetic	AGCTACGAAACAATGAGCGTAGCTACGTTCAAGGTCACGTAGCTACGATTAGCATCCCGTAGCTAGCGGCCCCACCCCGT
AGCAGAGGA	Kf-Or-Er-Sr_synthetic	AGCTACGGGGTGGGGCCGCTAGCTACGATTAGCATCCCGTAGCTACGTGACCTTGAACGTAGCTACGAAACAATGAGCGT
AGCAGATCT	Or-Sf_synthetic	AGCTACGATTAGCATCCCGTAGCTACGCTCATTGTTTCGT
AGCAGCAAG	Of-Kf-Er-Sf_synthetic	AGCTACGGGATGCTAATCGTAGCTACGGGGTGGGGCCGCTAGCTACGTGACCTTGAACGTAGCTACGCTCATTGTTTCGT
AGCAGCAGA	Er-Or-Sr-Kr_synthetic	AGCTACGTGACCTTGAACGTAGCTACGATTAGCATCCCGTAGCTACGAAACAATGAGCGTAGCTAGCGGCCCCACCCCGT
AGCAGCTAT	Kr-Of-Sr-Er_synthetic	AGCTAGCGGCCCCACCCCGTAGCTACGGGATGCTAATCGTAGCTACGAAACAATGAGCGTAGCTACGTGACCTTGAACGT
AGCAGGTCC	Kr-Or-Sf-Ef_synthetic	AGCTAGCGGCCCCACCCCGTAGCTACGATTAGCATCCCGTAGCTACGCTCATTGTTTCGTAGCTACGTTCAAGGTCACGT
AGCAGGTTA	Sr-Or-Ef-Kr_synthetic	AGCTACGAAACAATGAGCGTAGCTACGATTAGCATCCCGTAGCTACGTTCAAGGTCACGTAGCTAGCGGCCCCACCCCGT
AGCAGTGCA	EfOrOf_CMF-Scalar	AGCTACGTTCAAGGTCACGTAGCTACGATTAGCATCCCGTAGCTACGGGATGCTAATCGT
AGCAGTTCG	Or-Kf-Sf-Ef_synthetic	AGCTACGATTAGCATCCCGTAGCTACGGGGTGGGGCCGCTAGCTACGCTCATTGTTTCGTAGCTACGTTCAAGGTCACGT
AGCATAACT	Or-Kf-Sr-Er_synthetic	AGCTACGATTAGCATCCCGTAGCTACGGGGTGGGGCCGCTAGCTACGAAACAATGAGCGTAGCTACGTGACCTTGAACGT
AGCATCAAA	Kr-Sr_synthetic	AGCTAGCGGCCCCACCCCGTAGCTACGAAACAATGAGCGT
AGCATGAGA	Sr-Or-Ef-Kf_synthetic	AGCTACGAAACAATGAGCGTAGCTACGATTAGCATCCCGTAGCTACGTTCAAGGTCACGTAGCTACGGGGTGGGGCCGCT
AGCATGCAT	Sf-Or-Er-Kr_synthetic	AGCTACGCTCATTGTTTCGTAGCTACGATTAGCATCCCGTAGCTACGTGACCTTGAACGTAGCTAGCGGCCCCACCCCGT
AGCATGTAC	Of-Kf-Sr-Er_synthetic	AGCTACGGGATGCTAATCGTAGCTACGGGGTGGGGCCGCTAGCTACGAAACAATGAGCGTAGCTACGTGACCTTGAACGT
AGCATGTTG	Or-Kr-Ef-Sr_synthetic	AGCTACGATTAGCATCCCGTAGCTAGCGGCCCCACCCCGTAGCTACGTTCAAGGTCACGTAGCTACGAAACAATGAGCGT
AGCATTAAC	Ef-Kf-Sf-Of_synthetic	AGCTACGTTCAAGGTCACGTAGCTACGGGGTGGGGCCGCTAGCTACGCTCATTGTTTCGTAGCTACGGGATGCTAATCGT
AGCCAAACG	Ef-Of-Sf-Kr_synthetic	AGCTACGTTCAAGGTCACGTAGCTACGGGATGCTAATCGTAGCTACGCTCATTGTTTCGTAGCTAGCGGCCCCACCCCGT
AGCCACCTC	Sr-Kr-Or-Ef_synthetic	AGCTACGAAACAATGAGCGTAGCTAGCGGCCCCACCCCGTAGCTACGATTAGCATCCCGTAGCTACGTTCAAGGTCACGT
AGCCACGAG	Of-Kr-Ef_synthetic	AGCTACGGGATGCTAATCGTAGCTAGCGGCCCCACCCCGTAGCTACGTTCAAGGTCACGT
AGCCAGTGT	Or-Kr-Sf_synthetic	AGCTACGATTAGCATCCCGTAGCTAGCGGCCCCACCCCGTAGCTACGCTCATTGTTTCGT
AGCCATAGC	Kf-Sr-Er-Of_synthetic	AGCTACGGGGTGGGGCCGCTAGCTACGAAACAATGAGCGTAGCTACGTGACCTTGAACGTAGCTACGGGATGCTAATCGT
AGCCATGAC	Sr-Kr-Ef-Of_synthetic	AGCTACGAAACAATGAGCGTAGCTAGCGGCCCCACCCCGTAGCTACGTTCAAGGTCACGTAGCTACGGGATGCTAATCGT
AGCCATTCG	Sr-Kr-Ef-Of_synthetic	AGCTACGAAACAATGAGCGTAGCTAGCGGCCCCACCCCGTAGCTACGTTCAAGGTCACGTAGCTACGGGATGCTAATCGT
AGCCCATGT	Kf-Of-Sr-Ef_synthetic	AGCTACGGGGTGGGGCCGCTAGCTACGGGATGCTAATCGTAGCTACGAAACAATGAGCGTAGCTACGTTCAAGGTCACGT
AGCCCTAGA	Kr-Sr-Or-Ef_synthetic	AGCTAGCGGCCCCACCCCGTAGCTACGAAACAATGAGCGTAGCTACGATTAGCATCCCGTAGCTACGTTCAAGGTCACGT
AGCCCTGCT	Er-Kf-Sf_synthetic	AGCTACGTGACCTTGAACGTAGCTACGGGGTGGGGCCGCTAGCTACGCTCATTGTTTCGT
AGCCGAAGC	Er-Or-Sr-Kf_synthetic	AGCTACGTGACCTTGAACGTAGCTACGATTAGCATCCCGTAGCTACGAAACAATGAGCGTAGCTACGGGGTGGGGCCGCT
AGCCGCATA	Of-Er-Sr-Kr_synthetic	AGCTACGGGATGCTAATCGTAGCTACGTGACCTTGAACGTAGCTACGAAACAATGAGCGTAGCTAGCGGCCCCACCCCGT
AGCCGCGAA	Sf-Ef-Of_synthetic	AGCTACGCTCATTGTTTCGTAGCTACGTTCAAGGTCACGTAGCTACGGGATGCTAATCGT
AGCCGTCCA	Er-Or-Sr_synthetic	AGCTACGTGACCTTGAACGTAGCTACGATTAGCATCCCGTAGCTACGAAACAATGAGCGT
AGCCGTCGT	Ef-Sf-Kr-Of_synthetic	AGCTACGTTCAAGGTCACGTAGCTACGCTCATTGTTTCGTAGCTAGCGGCCCCACCCCGTAGCTACGGGATGCTAATCGT
AGCCTAATA	Sf-Of-Kr-Ef_synthetic	AGCTACGCTCATTGTTTCGTAGCTACGGGATGCTAATCGTAGCTAGCGGCCCCACCCCGTAGCTACGTTCAAGGTCACGT
AGCCTATCG	Ef-Or-Kr-Sf_synthetic	AGCTACGTTCAAGGTCACGTAGCTACGATTAGCATCCCGTAGCTAGCGGCCCCACCCCGTAGCTACGCTCATTGTTTCGT
AGCCTCTAT	Ef-Kr-Sr-Or_synthetic	AGCTACGTTCAAGGTCACGTAGCTAGCGGCCCCACCCCGTAGCTACGAAACAATGAGCGTAGCTACGATTAGCATCCCGT
AGCCTGACC	Kr-Ef-Or-Sr_synthetic	AGCTAGCGGCCCCACCCCGTAGCTACGTTCAAGGTCACGTAGCTACGATTAGCATCCCGTAGCTACGAAACAATGAGCGT
AGCCTGCGT	Of-Er-Kr-Sr_synthetic	AGCTACGGGATGCTAATCGTAGCTACGTGACCTTGAACGTAGCTAGCGGCCCCACCCCGTAGCTACGAAACAATGAGCGT
AGCCTGGGA	Kf-Ef-Sr_synthetic	AGCTACGGGGTGGGGCCGCTAGCTACGTTCAAGGTCACGTAGCTACGAAACAATGAGCGT
AGCCTGTGC	Or-Kr-Sr-Ef_synthetic	AGCTACGATTAGCATCCCGTAGCTAGCGGCCCCACCCCGTAGCTACGAAACAATGAGCGTAGCTACGTTCAAGGTCACGT
AGCCTTTGT	Sr-Er-Kf_synthetic	AGCTACGAAACAATGAGCGTAGCTACGTGACCTTGAACGTAGCTACGGGGTGGGGCCGCT
AGCGAACAG	Kf-Or-Sf-Er_synthetic	AGCTACGGGGTGGGGCCGCTAGCTACGATTAGCATCCCGTAGCTACGCTCATTGTTTCGTAGCTACGTGACCTTGAACGT
AGCGACCAT	Ef-Sf_synthetic	AGCTACGTTCAAGGTCACGTAGCTACGCTCATTGTTTCGT
AGCGACGGT	Sr-Kr-Er-Or_synthetic	AGCTACGAAACAATGAGCGTAGCTAGCGGCCCCACCCCGTAGCTACGTGACCTTGAACGTAGCTACGATTAGCATCCCGT
AGCGAGTAG	Or-Ef-Sf-Kr_synthetic	AGCTACGATTAGCATCCCGTAGCTACGTTCAAGGTCACGTAGCTACGCTCATTGTTTCGTAGCTAGCGGCCCCACCCCGT
AGCGAGTTA	Kr-Of-Sf-Er_synthetic	AGCTAGCGGCCCCACCCCGTAGCTACGGGATGCTAATCGTAGCTACGCTCATTGTTTCGTAGCTACGTGACCTTGAACGT
AGCGCATCG	Sf-Ef-Of-Kr_synthetic	AGCTACGCTCATTGTTTCGTAGCTACGTTCAAGGTCACGTAGCTACGGGATGCTAATCGTAGCTAGCGGCCCCACCCCGT
AGCGCCATC	Ef-Sf-Kr-Or_synthetic	AGCTACGTTCAAGGTCACGTAGCTACGCTCATTGTTTCGTAGCTAGCGGCCCCACCCCGTAGCTACGATTAGCATCCCGT
AGCGCCTCT	Kf-Or-Sf-Er_synthetic	AGCTACGGGGTGGGGCCGCTAGCTACGATTAGCATCCCGTAGCTACGCTCATTGTTTCGTAGCTACGTGACCTTGAACGT
AGCGCTAAC	SrKf_CMF-Scalar	AGCTACGAAACAATGAGCGTAGCTACGGGGCGGGGCCGCT
AGCGCTTCC	Or-Sf-Kf-Er_synthetic	AGCTACGATTAGCATCCCGTAGCTACGCTCATTGTTTCGTAGCTACGGGGTGGGGCCGCTAGCTACGTGACCTTGAACGT
AGCGGCGAT	Kf-Er_synthetic	AGCTACGGGGTGGGGCCGCTAGCTACGTGACCTTGAACGT
AGCGGTAGA	Ef-Kr-Sr-Of_synthetic	AGCTACGTTCAAGGTCACGTAGCTAGCGGCCCCACCCCGTAGCTACGAAACAATGAGCGTAGCTACGGGATGCTAATCGT
AGCGGTTAT	Kr-Or-Er-Sf_synthetic	AGCTAGCGGCCCCACCCCGTAGCTACGATTAGCATCCCGTAGCTACGTGACCTTGAACGTAGCTACGCTCATTGTTTCGT
AGCGGTTTA	Of-Kr-Er_synthetic	AGCTACGGGATGCTAATCGTAGCTAGCGGCCCCACCCCGTAGCTACGTGACCTTGAACGT
AGCGTACTC	Or-Sf-Ef-Kr_synthetic	AGCTACGATTAGCATCCCGTAGCTACGCTCATTGTTTCGTAGCTACGTTCAAGGTCACGTAGCTAGCGGCCCCACCCCGT
AGCGTAGGA	Sr-Or-Ef_synthetic	AGCTACGAAACAATGAGCGTAGCTACGATTAGCATCCCGTAGCTACGTTCAAGGTCACGT
AGCGTCGTG	Sf-Kr_synthetic	AGCTACGCTCATTGTTTCGTAGCTAGCGGCCCCACCCCGT
AGCGTCTTA	Er-Of-Kf_synthetic	AGCTACGTGACCTTGAACGTAGCTACGGGATGCTAATCGTAGCTACGGGGTGGGGCCGCT
AGCGTGCCT	Er-Of-Kf-Sf_synthetic	AGCTACGTGACCTTGAACGTAGCTACGGGATGCTAATCGTAGCTACGGGGTGGGGCCGCTAGCTACGCTCATTGTTTCGT
AGCGTGTGG	Sf-Kr-Ef-Or_synthetic	AGCTACGCTCATTGTTTCGTAGCTAGCGGCCCCACCCCGTAGCTACGTTCAAGGTCACGTAGCTACGATTAGCATCCCGT
AGCGTTATC	Sf-Kf-Of-Ef_synthetic	AGCTACGCTCATTGTTTCGTAGCTACGGGGTGGGGCCGCTAGCTACGGGATGCTAATCGTAGCTACGTTCAAGGTCACGT
AGCGTTGCT	Basal
AGCGTTTGC	Er-Kf-Or-Sr_synthetic	AGCTACGTGACCTTGAACGTAGCTACGGGGTGGGGCCGCTAGCTACGATTAGCATCCCGTAGCTACGAAACAATGAGCGT
AGCTAAAGA	Kr-Sf-Er_synthetic	AGCTAGCGGCCCCACCCCGTAGCTACGCTCATTGTTTCGTAGCTACGTGACCTTGAACGT
AGCTACCGC	Er-Sr-Kr_synthetic	AGCTACGTGACCTTGAACGTAGCTACGAAACAATGAGCGTAGCTAGCGGCCCCACCCCGT
AGCTAGGGA	Ef-Or-Sr-Kr_synthetic	AGCTACGTTCAAGGTCACGTAGCTACGATTAGCATCCCGTAGCTACGAAACAATGAGCGTAGCTAGCGGCCCCACCCCGT
AGCTATCTA	Kf-Sr-Or-Er_synthetic	AGCTACGGGGTGGGGCCGCTAGCTACGAAACAATGAGCGTAGCTACGATTAGCATCCCGTAGCTACGTGACCTTGAACGT
AGCTATGAT	Sr-Of-Kf_synthetic	AGCTACGAAACAATGAGCGTAGCTACGGGATGCTAATCGTAGCTACGGGGTGGGGCCGCT
AGCTATGTG	Or-Kf-Sf-Ef_synthetic	AGCTACGATTAGCATCCCGTAGCTACGGGGTGGGGCCGCTAGCTACGCTCATTGTTTCGTAGCTACGTTCAAGGTCACGT
AGCTCACCT	Ef-Kr-Sr_synthetic	AGCTACGTTCAAGGTCACGTAGCTAGCGGCCCCACCCCGTAGCTACGAAACAATGAGCGT
AGCTCCCAA	Or-Kr-Er-Sf_synthetic	AGCTACGATTAGCATCCCGTAGCTAGCGGCCCCACCCCGTAGCTACGTGACCTTGAACGTAGCTACGCTCATTGTTTCGT
AGCTCCTTC	Or-Er-Sf-Kf_synthetic	AGCTACGATTAGCATCCCGTAGCTACGTGACCTTGAACGTAGCTACGCTCATTGTTTCGTAGCTACGGGGTGGGGCCGCT
AGCTCGAAA	Or-Sr_synthetic	AGCTACGATTAGCATCCCGTAGCTACGAAACAATGAGCGT
AGCTCGCTA	Sf-Ef-Of-Kf_synthetic	AGCTACGCTCATTGTTTCGTAGCTACGTTCAAGGTCACGTAGCTACGGGATGCTAATCGTAGCTACGGGGTGGGGCCGCT
AGCTCGGTG	Er-Kr-Sf-Or_synthetic	AGCTACGTGACCTTGAACGTAGCTAGCGGCCCCACCCCGTAGCTACGCTCATTGTTTCGTAGCTACGATTAGCATCCCGT
AGCTCTCGT	Of-Kf-Er-Sr_synthetic	AGCTACGGGATGCTAATCGTAGCTACGGGGTGGGGCCGCTAGCTACGTGACCTTGAACGTAGCTACGAAACAATGAGCGT
AGCTCTGCG	Er-Kr-Of-Sr_synthetic	AGCTACGTGACCTTGAACGTAGCTAGCGGCCCCACCCCGTAGCTACGGGATGCTAATCGTAGCTACGAAACAATGAGCGT
AGCTCTTCT	Sf-Or-Ef-Kf_synthetic	AGCTACGCTCATTGTTTCGTAGCTACGATTAGCATCCCGTAGCTACGTTCAAGGTCACGTAGCTACGGGGTGGGGCCGCT
AGCTGAGCT	Kr-Sf_synthetic	AGCTAGCGGCCCCACCCCGTAGCTACGCTCATTGTTTCGT
AGCTGCAAC	Or-Er_synthetic	AGCTACGATTAGCATCCCGTAGCTACGTGACCTTGAACGT
AGCTGCATT	Of-Kr-Er-Sf_synthetic	AGCTACGGGATGCTAATCGTAGCTAGCGGCCCCACCCCGTAGCTACGTGACCTTGAACGTAGCTACGCTCATTGTTTCGT
AGCTGTGCC	Ef-Kr-Of_synthetic	AGCTACGTTCAAGGTCACGTAGCTAGCGGCCCCACCCCGTAGCTACGGGATGCTAATCGT
AGCTTTAGT	Kr-Sr-Er_synthetic	AGCTAGCGGCCCCACCCCGTAGCTACGAAACAATGAGCGTAGCTACGTGACCTTGAACGT
AGGAAAGAG	Kf-Sr-Or-Ef_synthetic	AGCTACGGGGTGGGGCCGCTAGCTACGAAACAATGAGCGTAGCTACGATTAGCATCCCGTAGCTACGTTCAAGGTCACGT
AGGAACGCG	Or-Ef-Sr-Kr_synthetic	AGCTACGATTAGCATCCCGTAGCTACGTTCAAGGTCACGTAGCTACGAAACAATGAGCGTAGCTAGCGGCCCCACCCCGT
AGGAACTAT	Kf-Er-Of-Sr_synthetic	AGCTACGGGGTGGGGCCGCTAGCTACGTGACCTTGAACGTAGCTACGGGATGCTAATCGTAGCTACGAAACAATGAGCGT
AGGAAGCGT	Of-Kf_synthetic	AGCTACGGGATGCTAATCGTAGCTACGGGGTGGGGCCGCT
AGGACAGAA	Kr-Sr-Er-Or_synthetic	AGCTAGCGGCCCCACCCCGTAGCTACGAAACAATGAGCGTAGCTACGTGACCTTGAACGTAGCTACGATTAGCATCCCGT
AGGACCCAC	Er-Sr-Of_synthetic	AGCTACGTGACCTTGAACGTAGCTACGAAACAATGAGCGTAGCTACGGGATGCTAATCGT
AGGACGTAT	Of-Sr-Kr-Ef_synthetic	AGCTACGGGATGCTAATCGTAGCTACGAAACAATGAGCGTAGCTAGCGGCCCCACCCCGTAGCTACGTTCAAGGTCACGT
AGGACTCTC	Sf-Of-Ef-Kf_synthetic	AGCTACGCTCATTGTTTCGTAGCTACGGGATGCTAATCGTAGCTACGTTCAAGGTCACGTAGCTACGGGGTGGGGCCGCT
AGGACTGCT	Sf-Of-Ef-Kr_synthetic	AGCTACGCTCATTGTTTCGTAGCTACGGGATGCTAATCGTAGCTACGTTCAAGGTCACGTAGCTAGCGGCCCCACCCCGT
AGGAGAGCC	Of-Kr-Ef-Sf_synthetic	AGCTACGGGATGCTAATCGTAGCTAGCGGCCCCACCCCGTAGCTACGTTCAAGGTCACGTAGCTACGCTCATTGTTTCGT
AGGAGGAAG	Kr-Ef-Sf_synthetic	AGCTAGCGGCCCCACCCCGTAGCTACGTTCAAGGTCACGTAGCTACGCTCATTGTTTCGT
AGGAGTCGG	Sf-Of-Er_synthetic	AGCTACGCTCATTGTTTCGTAGCTACGGGATGCTAATCGTAGCTACGTGACCTTGAACGT
AGGATATCT	Kr-Or-Sr_synthetic	AGCTAGCGGCCCCACCCCGTAGCTACGATTAGCATCCCGTAGCTACGAAACAATGAGCGT
AGGATCAGA	Kf-Of-Er-Sr_synthetic	AGCTACGGGGTGGGGCCGCTAGCTACGGGATGCTAATCGTAGCTACGTGACCTTGAACGTAGCTACGAAACAATGAGCGT
AGGATCCAA	Or-Sf-Kr-Ef_synthetic	AGCTACGATTAGCATCCCGTAGCTACGCTCATTGTTTCGTAGCTAGCGGCCCCACCCCGTAGCTACGTTCAAGGTCACGT
AGGATGACT	Kf-Ef-Of-Sr_synthetic	AGCTACGGGGTGGGGCCGCTAGCTACGTTCAAGGTCACGTAGCTACGGGATGCTAATCGTAGCTACGAAACAATGAGCGT
AGGATGCTG	Or-Er-Sr-Kf_synthetic	AGCTACGATTAGCATCCCGTAGCTACGTGACCTTGAACGTAGCTACGAAACAATGAGCGTAGCTACGGGGTGGGGCCGCT
AGGATTGCA	Or-Kf-Er-Sr_synthetic	AGCTACGATTAGCATCCCGTAGCTACGGGGTGGGGCCGCTAGCTACGTGACCTTGAACGTAGCTACGAAACAATGAGCGT
AGGATTGGG	Er-Sr-Or_synthetic	AGCTACGTGACCTTGAACGTAGCTACGAAACAATGAGCGTAGCTACGATTAGCATCCCGT
AGGATTTCG	Of-Er-Kf-Sr_synthetic	AGCTACGGGATGCTAATCGTAGCTACGTGACCTTGAACGTAGCTACGGGGTGGGGCCGCTAGCTACGAAACAATGAGCGT
AGGCAACCC	Kr-Er-Sr-Or_synthetic	AGCTAGCGGCCCCACCCCGTAGCTACGTGACCTTGAACGTAGCTACGAAACAATGAGCGTAGCTACGATTAGCATCCCGT
AGGCAACTT	Or-Kf-Ef-Sr_synthetic	AGCTACGATTAGCATCCCGTAGCTACGGGGTGGGGCCGCTAGCTACGTTCAAGGTCACGTAGCTACGAAACAATGAGCGT
AGGCACCAT	Ef-Of-Sf-Kf_synthetic	AGCTACGTTCAAGGTCACGTAGCTACGGGATGCTAATCGTAGCTACGCTCATTGTTTCGTAGCTACGGGGTGGGGCCGCT
AGGCAGATT	Of-Kr-Sf-Ef_synthetic	AGCTACGGGATGCTAATCGTAGCTAGCGGCCCCACCCCGTAGCTACGCTCATTGTTTCGTAGCTACGTTCAAGGTCACGT
AGGCATTCT	Kf-Of-Ef-Sf_synthetic	AGCTACGGGGTGGGGCCGCTAGCTACGGGATGCTAATCGTAGCTACGTTCAAGGTCACGTAGCTACGCTCATTGTTTCGT
AGGCATTTA	Of-Sf-Ef-Kr_synthetic	AGCTACGGGATGCTAATCGTAGCTACGCTCATTGTTTCGTAGCTACGTTCAAGGTCACGTAGCTAGCGGCCCCACCCCGT
AGGCCAAGA	Kf-Er-Or-Sf_synthetic	AGCTACGGGGTGGGGCCGCTAGCTACGTGACCTTGAACGTAGCTACGATTAGCATCCCGTAGCTACGCTCATTGTTTCGT
AGGCCCATT	Of-Sr-Kr-Er_synthetic	AGCTACGGGATGCTAATCGTAGCTACGAAACAATGAGCGTAGCTAGCGGCCCCACCCCGTAGCTACGTGACCTTGAACGT
AGGCCCTAC	Of-Er-Sf_synthetic	AGCTACGGGATGCTAATCGTAGCTACGTGACCTTGAACGTAGCTACGCTCATTGTTTCGT
AGGCCTTGT	Sf-Ef-Or-Kr_synthetic	AGCTACGCTCATTGTTTCGTAGCTACGTTCAAGGTCACGTAGCTACGATTAGCATCCCGTAGCTAGCGGCCCCACCCCGT
AGGCGATGC	Sr-Kr-Er-Or_synthetic	AGCTACGAAACAATGAGCGTAGCTAGCGGCCCCACCCCGTAGCTACGTGACCTTGAACGTAGCTACGATTAGCATCCCGT
AGGCGGAAA	Er-Sr-Kf-Of_synthetic	AGCTACGTGACCTTGAACGTAGCTACGAAACAATGAGCGTAGCTACGGGGTGGGGCCGCTAGCTACGGGATGCTAATCGT
AGGCGTGAG	Kr-Er-Sf-Of_synthetic	AGCTAGCGGCCCCACCCCGTAGCTACGTGACCTTGAACGTAGCTACGCTCATTGTTTCGTAGCTACGGGATGCTAATCGT
AGGCGTGTT	Ef-Of-Sr-Kf_synthetic	AGCTACGTTCAAGGTCACGTAGCTACGGGATGCTAATCGTAGCTACGAAACAATGAGCGTAGCTACGGGGTGGGGCCGCT
AGGCTACTC	Ef-Or-Kf-Sr_synthetic	AGCTACGTTCAAGGTCACGTAGCTACGATTAGCATCCCGTAGCTACGGGGTGGGGCCGCTAGCTACGAAACAATGAGCGT
AGGCTATAT	Or-Sr-Kf-Er_synthetic	AGCTACGATTAGCATCCCGTAGCTACGAAACAATGAGCGTAGCTACGGGGTGGGGCCGCTAGCTACGTGACCTTGAACGT
AGGCTATGA	Kf-Sf-Ef-Or_synthetic	AGCTACGGGGTGGGGCCGCTAGCTACGCTCATTGTTTCGTAGCTACGTTCAAGGTCACGTAGCTACGATTAGCATCCCGT
AGGCTATTG	Ef-Or-Sr_synthetic	AGCTACGTTCAAGGTCACGTAGCTACGATTAGCATCCCGTAGCTACGAAACAATGAGCGT
AGGCTCCTA	Or-Kf-Ef-Sf_synthetic	AGCTACGATTAGCATCCCGTAGCTACGGGGTGGGGCCGCTAGCTACGTTCAAGGTCACGTAGCTACGCTCATTGTTTCGT
AGGCTCGTT	Ef-Of-Kr-Sf_synthetic	AGCTACGTTCAAGGTCACGTAGCTACGGGATGCTAATCGTAGCTAGCGGCCCCACCCCGTAGCTACGCTCATTGTTTCGT
AGGCTGAGC	Or-Sr-Ef_synthetic	AGCTACGATTAGCATCCCGTAGCTACGAAACAATGAGCGTAGCTACGTTCAAGGTCACGT
AGGCTGTGT	Er-Sr-Kr-Of_synthetic	AGCTACGTGACCTTGAACGTAGCTACGAAACAATGAGCGTAGCTAGCGGCCCCACCCCGTAGCTACGGGATGCTAATCGT
AGGCTTGGC	Of-Er-Sf-Kf_synthetic	AGCTACGGGATGCTAATCGTAGCTACGTGACCTTGAACGTAGCTACGCTCATTGTTTCGTAGCTACGGGGTGGGGCCGCT
AGGGACAGT	Ef-Of-Sr_synthetic	AGCTACGTTCAAGGTCACGTAGCTACGGGATGCTAATCGTAGCTACGAAACAATGAGCGT
AGGGATGAC	Ef-Kr-Sr-Of_synthetic	AGCTACGTTCAAGGTCACGTAGCTAGCGGCCCCACCCCGTAGCTACGAAACAATGAGCGTAGCTACGGGATGCTAATCGT
AGGGCAGGT	Ef-Sr-Kf-Or_synthetic	AGCTACGTTCAAGGTCACGTAGCTACGAAACAATGAGCGTAGCTACGGGGTGGGGCCGCTAGCTACGATTAGCATCCCGT
AGGGCATTA	Sf-Of-Ef-Kr_synthetic	AGCTACGCTCATTGTTTCGTAGCTACGGGATGCTAATCGTAGCTACGTTCAAGGTCACGTAGCTAGCGGCCCCACCCCGT
AGGGCCGTT	Or-Sf-Ef_synthetic	AGCTACGATTAGCATCCCGTAGCTACGCTCATTGTTTCGTAGCTACGTTCAAGGTCACGT
AGGGCTAAG	Ef-Kr-Sr-Of_synthetic	AGCTACGTTCAAGGTCACGTAGCTAGCGGCCCCACCCCGTAGCTACGAAACAATGAGCGTAGCTACGGGATGCTAATCGT
AGGGTAGCC	Sr-Of_synthetic	AGCTACGAAACAATGAGCGTAGCTACGGGATGCTAATCGT
AGGGTAGTA	Kf-Sr-Or-Ef_synthetic	AGCTACGGGGTGGGGCCGCTAGCTACGAAACAATGAGCGTAGCTACGATTAGCATCCCGTAGCTACGTTCAAGGTCACGT
AGGGTATTC	Kf-Sr-Of-Ef_synthetic	AGCTACGGGGTGGGGCCGCTAGCTACGAAACAATGAGCGTAGCTACGGGATGCTAATCGTAGCTACGTTCAAGGTCACGT
AGGGTTGCG	Kf-Of-Ef-Sf_synthetic	AGCTACGGGGTGGGGCCGCTAGCTACGGGATGCTAATCGTAGCTACGTTCAAGGTCACGTAGCTACGCTCATTGTTTCGT
AGGTACCGT	Sr-Er-Kr-Or_synthetic	AGCTACGAAACAATGAGCGTAGCTACGTGACCTTGAACGTAGCTAGCGGCCCCACCCCGTAGCTACGATTAGCATCCCGT
AGGTACGGA	Ef-Kf-Of_synthetic	AGCTACGTTCAAGGTCACGTAGCTACGGGGTGGGGCCGCTAGCTACGGGATGCTAATCGT
AGGTACTCT	Kr-Ef_synthetic	AGCTAGCGGCCCCACCCCGTAGCTACGTTCAAGGTCACGT
AGGTAGGAT	Ef-Sf-Of_synthetic	AGCTACGTTCAAGGTCACGTAGCTACGCTCATTGTTTCGTAGCTACGGGATGCTAATCGT
AGGTAGGCG	Er-Kr_synthetic	AGCTACGTGACCTTGAACGTAGCTAGCGGCCCCACCCCGT
AGGTATAGT	Sf-Kr_synthetic	AGCTACGCTCATTGTTTCGTAGCTAGCGGCCCCACCCCGT
AGGTATCGA	Or-Sf-Ef-Kf_synthetic	AGCTACGATTAGCATCCCGTAGCTACGCTCATTGTTTCGTAGCTACGTTCAAGGTCACGTAGCTACGGGGTGGGGCCGCT
AGGTCAAAT	Kr-Sf-Or-Ef_synthetic	AGCTAGCGGCCCCACCCCGTAGCTACGCTCATTGTTTCGTAGCTACGATTAGCATCCCGTAGCTACGTTCAAGGTCACGT
AGGTCAGGG	Er-Sf-Or-Kr_synthetic	AGCTACGTGACCTTGAACGTAGCTACGCTCATTGTTTCGTAGCTACGATTAGCATCCCGTAGCTAGCGGCCCCACCCCGT
AGGTCCGAT	Basal
AGGTCCTCG	Or-Kf-Er_synthetic	AGCTACGATTAGCATCCCGTAGCTACGGGGTGGGGCCGCTAGCTACGTGACCTTGAACGT
AGGTCGTCA	Sr-Kf-Ef_synthetic	AGCTACGAAACAATGAGCGTAGCTACGGGGTGGGGCCGCTAGCTACGTTCAAGGTCACGT
AGGTGCTGA	Er-Sf-Or-Kf_synthetic	AGCTACGTGACCTTGAACGTAGCTACGCTCATTGTTTCGTAGCTACGATTAGCATCCCGTAGCTACGGGGTGGGGCCGCT
AGGTGTAGA	Kf-Or-Er-Sf_synthetic	AGCTACGGGGTGGGGCCGCTAGCTACGATTAGCATCCCGTAGCTACGTGACCTTGAACGTAGCTACGCTCATTGTTTCGT
AGGTGTCAG	Kf-Sf-Ef-Of_synthetic	AGCTACGGGGTGGGGCCGCTAGCTACGCTCATTGTTTCGTAGCTACGTTCAAGGTCACGTAGCTACGGGATGCTAATCGT
AGGTGTGGC	Ef-Sr-Kr-Or_synthetic	AGCTACGTTCAAGGTCACGTAGCTACGAAACAATGAGCGTAGCTAGCGGCCCCACCCCGTAGCTACGATTAGCATCCCGT
AGGTTAAGG	Ef-Sf_synthetic	AGCTACGTTCAAGGTCACGTAGCTACGCTCATTGTTTCGT
AGGTTACCC	Sf-Or-Er_synthetic	AGCTACGCTCATTGTTTCGTAGCTACGATTAGCATCCCGTAGCTACGTGACCTTGAACGT
AGGTTACTA	Ef-Sr_synthetic	AGCTACGTTCAAGGTCACGTAGCTACGAAACAATGAGCGT
AGGTTCGTA	Of-Sr-Er-Kr_synthetic	AGCTACGGGATGCTAATCGTAGCTACGAAACAATGAGCGTAGCTACGTGACCTTGAACGTAGCTAGCGGCCCCACCCCGT
AGGTTGACG	Kf-Sf-Of-Ef_synthetic	AGCTACGGGGTGGGGCCGCTAGCTACGCTCATTGTTTCGTAGCTACGGGATGCTAATCGTAGCTACGTTCAAGGTCACGT
AGGTTGCAC	Sr-Kr-Ef-Or_synthetic	AGCTACGAAACAATGAGCGTAGCTAGCGGCCCCACCCCGTAGCTACGTTCAAGGTCACGTAGCTACGATTAGCATCCCGT
AGGTTGTAT	Kf-Sf-Of-Ef_synthetic	AGCTACGGGGTGGGGCCGCTAGCTACGCTCATTGTTTCGTAGCTACGGGATGCTAATCGTAGCTACGTTCAAGGTCACGT
AGGTTTCTC	Sr-Or-Kf-Er_synthetic	AGCTACGAAACAATGAGCGTAGCTACGATTAGCATCCCGTAGCTACGGGGTGGGGCCGCTAGCTACGTGACCTTGAACGT
AGGTTTGTT	Sr-Of-Kf-Er_synthetic	AGCTACGAAACAATGAGCGTAGCTACGGGATGCTAATCGTAGCTACGGGGTGGGGCCGCTAGCTACGTGACCTTGAACGT
AGTAAAGCC	Ef-Kr_synthetic	AGCTACGTTCAAGGTCACGTAGCTAGCGGCCCCACCCCGT
AGTAAATGG	Kf-Sf-Of_synthetic	AGCTACGGGGTGGGGCCGCTAGCTACGCTCATTGTTTCGTAGCTACGGGATGCTAATCGT
AGTAACGCA	Of-Kr-Sf-Er_synthetic	AGCTACGGGATGCTAATCGTAGCTAGCGGCCCCACCCCGTAGCTACGCTCATTGTTTCGTAGCTACGTGACCTTGAACGT
AGTAAGACG	Er-Kr-Sf-Of_synthetic	AGCTACGTGACCTTGAACGTAGCTAGCGGCCCCACCCCGTAGCTACGCTCATTGTTTCGTAGCTACGGGATGCTAATCGT
AGTAAGGAT	Sr-Or-Ef-Kf_synthetic	AGCTACGAAACAATGAGCGTAGCTACGATTAGCATCCCGTAGCTACGTTCAAGGTCACGTAGCTACGGGGTGGGGCCGCT
AGTAAGTCT	Er-Sr-Or_synthetic	AGCTACGTGACCTTGAACGTAGCTACGAAACAATGAGCGTAGCTACGATTAGCATCCCGT
AGTAAGTTC	Kf-Er-Sr-Or_synthetic	AGCTACGGGGTGGGGCCGCTAGCTACGTGACCTTGAACGTAGCTACGAAACAATGAGCGTAGCTACGATTAGCATCCCGT
AGTAATCCA	Sr-Or-Er-Kf_synthetic	AGCTACGAAACAATGAGCGTAGCTACGATTAGCATCCCGTAGCTACGTGACCTTGAACGTAGCTACGGGGTGGGGCCGCT
AGTACACGG	Kr-Or-Ef-Sf_synthetic	AGCTAGCGGCCCCACCCCGTAGCTACGATTAGCATCCCGTAGCTACGTTCAAGGTCACGTAGCTACGCTCATTGTTTCGT
AGTACAGGT	Sf-Er_synthetic	AGCTACGCTCATTGTTTCGTAGCTACGTGACCTTGAACGT
AGTACATAG	Sf-Ef-Kr-Of_synthetic	AGCTACGCTCATTGTTTCGTAGCTACGTTCAAGGTCACGTAGCTAGCGGCCCCACCCCGTAGCTACGGGATGCTAATCGT
AGTACCACG	Kf-Sf-Of-Ef_synthetic	AGCTACGGGGTGGGGCCGCTAGCTACGCTCATTGTTTCGTAGCTACGGGATGCTAATCGTAGCTACGTTCAAGGTCACGT
AGTACCGTT	Ef-Kr-Sr-Or_synthetic	AGCTACGTTCAAGGTCACGTAGCTAGCGGCCCCACCCCGTAGCTACGAAACAATGAGCGTAGCTACGATTAGCATCCCGT
AGTACCTTC	Sr-Kr-Of-Ef_synthetic	AGCTACGAAACAATGAGCGTAGCTAGCGGCCCCACCCCGTAGCTACGGGATGCTAATCGTAGCTACGTTCAAGGTCACGT
AGTACGAAG	Kf-Er-Sr-Of_synthetic	AGCTACGGGGTGGGGCCGCTAGCTACGTGACCTTGAACGTAGCTACGAAACAATGAGCGTAGCTACGGGATGCTAATCGT
AGTACGACA	Or-Er-Sf_synthetic	AGCTACGATTAGCATCCCGTAGCTACGTGACCTTGAACGTAGCTACGCTCATTGTTTCGT
AGTACGTAA	Ef-Of-Kr-Sf_synthetic	AGCTACGTTCAAGGTCACGTAGCTACGGGATGCTAATCGTAGCTAGCGGCCCCACCCCGTAGCTACGCTCATTGTTTCGT
AGTACTTGT	Kr-Sr-Or_synthetic	AGCTAGCGGCCCCACCCCGTAGCTACGAAACAATGAGCGTAGCTACGATTAGCATCCCGT
AGTAGAGAT	Of-Sr-Er_synthetic	AGCTACGGGATGCTAATCGTAGCTACGAAACAATGAGCGTAGCTACGTGACCTTGAACGT
AGTAGCGGC	Of-Kr-Er-Sr_synthetic	AGCTACGGGATGCTAATCGTAGCTAGCGGCCCCACCCCGTAGCTACGTGACCTTGAACGTAGCTACGAAACAATGAGCGT
AGTAGGTAT	Kr-Er-Sf_synthetic	AGCTAGCGGCCCCACCCCGTAGCTACGTGACCTTGAACGTAGCTACGCTCATTGTTTCGT
AGTAGGTGC	Sr-Kf-Or-Er_synthetic	AGCTACGAAACAATGAGCGTAGCTACGGGGTGGGGCCGCTAGCTACGATTAGCATCCCGTAGCTACGTGACCTTGAACGT
AGTAGTACC	Kr-Sr-Or-Er_synthetic	AGCTAGCGGCCCCACCCCGTAGCTACGAAACAATGAGCGTAGCTACGATTAGCATCCCGTAGCTACGTGACCTTGAACGT
AGTATACTC	Kr-Sr_synthetic	AGCTAGCGGCCCCACCCCGTAGCTACGAAACAATGAGCGT
AGTATCTCC	Er-Or-Kr-Sf_synthetic	AGCTACGTGACCTTGAACGTAGCTACGATTAGCATCCCGTAGCTAGCGGCCCCACCCCGTAGCTACGCTCATTGTTTCGT
AGTCAAGGG	Ef-Kr-Sr-Or_synthetic	AGCTACGTTCAAGGTCACGTAGCTAGCGGCCCCACCCCGTAGCTACGAAACAATGAGCGTAGCTACGATTAGCATCCCGT
AGTCACTCT	Sr-Or-Kf-Er_synthetic	AGCTACGAAACAATGAGCGTAGCTACGATTAGCATCCCGTAGCTACGGGGTGGGGCCGCTAGCTACGTGACCTTGAACGT
AGTCAGCCA	Or-Kr-Er_synthetic	AGCTACGATTAGCATCCCGTAGCTAGCGGCCCCACCCCGTAGCTACGTGACCTTGAACGT
AGTCATCCC	Sr-Kf-Of-Ef_synthetic	AGCTACGAAACAATGAGCGTAGCTACGGGGTGGGGCCGCTAGCTACGGGATGCTAATCGTAGCTACGTTCAAGGTCACGT
AGTCCACAA	Kf-Of-Ef_synthetic	AGCTACGGGGTGGGGCCGCTAGCTACGGGATGCTAATCGTAGCTACGTTCAAGGTCACGT
AGTCCCGCT	Ef-Of-Sf-Kr_synthetic	AGCTACGTTCAAGGTCACGTAGCTACGGGATGCTAATCGTAGCTACGCTCATTGTTTCGTAGCTAGCGGCCCCACCCCGT
AGTCCGACG	Of-Kr-Er_synthetic	AGCTACGGGATGCTAATCGTAGCTAGCGGCCCCACCCCGTAGCTACGTGACCTTGAACGT
AGTCCGCGT	Ef-Of-Kf-Sf_synthetic	AGCTACGTTCAAGGTCACGTAGCTACGGGATGCTAATCGTAGCTACGGGGTGGGGCCGCTAGCTACGCTCATTGTTTCGT
AGTCCGGAC	Or-Kf-Sf_synthetic	AGCTACGATTAGCATCCCGTAGCTACGGGGTGGGGCCGCTAGCTACGCTCATTGTTTCGT
AGTCCGGTA	Kr-Ef-Of_synthetic	AGCTAGCGGCCCCACCCCGTAGCTACGTTCAAGGTCACGTAGCTACGGGATGCTAATCGT
AGTCCTAGC	Er-Kf-Or-Sf_synthetic	AGCTACGTGACCTTGAACGTAGCTACGGGGTGGGGCCGCTAGCTACGATTAGCATCCCGTAGCTACGCTCATTGTTTCGT
AGTCCTCCG	KfSrOfKr_CMF-Scalar	AGCTACGGGGCGGGGCCGCTAGCTACGAAACAATGAGCGTAGCTACGGGATGCTAATCGTAGCTAGCGGCCCCGCCCCGT
AGTCCTTAA	Er-Of-Kr-Sr_synthetic	AGCTACGTGACCTTGAACGTAGCTACGGGATGCTAATCGTAGCTAGCGGCCCCACCCCGTAGCTACGAAACAATGAGCGT
AGTCCTTTG	Sf-Of-Er_synthetic	AGCTACGCTCATTGTTTCGTAGCTACGGGATGCTAATCGTAGCTACGTGACCTTGAACGT
AGTCGACCG	Sr-Or-Ef_synthetic	AGCTACGAAACAATGAGCGTAGCTACGATTAGCATCCCGTAGCTACGTTCAAGGTCACGT
AGTCGATAC	Sr-Or-Ef_synthetic	AGCTACGAAACAATGAGCGTAGCTACGATTAGCATCCCGTAGCTACGTTCAAGGTCACGT
AGTCGCAGT	Sr-Ef-Kf-Or_synthetic	AGCTACGAAACAATGAGCGTAGCTACGTTCAAGGTCACGTAGCTACGGGGTGGGGCCGCTAGCTACGATTAGCATCCCGT
AGTCGTTCT	Ef-Kr-Sf_synthetic	AGCTACGTTCAAGGTCACGTAGCTAGCGGCCCCACCCCGTAGCTACGCTCATTGTTTCGT
AGTCGTTGC	Sr-Er-Or-Kf_synthetic	AGCTACGAAACAATGAGCGTAGCTACGTGACCTTGAACGTAGCTACGATTAGCATCCCGTAGCTACGGGGTGGGGCCGCT
AGTCTCCAG	Or-Ef-Sr_synthetic	AGCTACGATTAGCATCCCGTAGCTACGTTCAAGGTCACGTAGCTACGAAACAATGAGCGT
AGTCTCGGG	Kf-Sf-Or_synthetic	AGCTACGGGGTGGGGCCGCTAGCTACGCTCATTGTTTCGTAGCTACGATTAGCATCCCGT
AGTCTGATG	Ef-Or-Kf-Sr_synthetic	AGCTACGTTCAAGGTCACGTAGCTACGATTAGCATCCCGTAGCTACGGGGTGGGGCCGCTAGCTACGAAACAATGAGCGT
AGTCTGTCG	Ef-Kr_synthetic	AGCTACGTTCAAGGTCACGTAGCTAGCGGCCCCACCCCGT
AGTCTTAGT	Kr-Of-Er_synthetic	AGCTAGCGGCCCCACCCCGTAGCTACGGGATGCTAATCGTAGCTACGTGACCTTGAACGT
AGTGAAGCA	Kr-Er-Sr-Or_synthetic	AGCTAGCGGCCCCACCCCGTAGCTACGTGACCTTGAACGTAGCTACGAAACAATGAGCGTAGCTACGATTAGCATCCCGT
AGTGACATT	Er-Of_synthetic	AGCTACGTGACCTTGAACGTAGCTACGGGATGCTAATCGT
AGTGACTTG	Kf-Er-Sr-Of_synthetic	AGCTACGGGGTGGGGCCGCTAGCTACGTGACCTTGAACGTAGCTACGAAACAATGAGCGTAGCTACGGGATGCTAATCGT
AGTGAGCGC	Kr-Or-Sf-Er_synthetic	AGCTAGCGGCCCCACCCCGTAGCTACGATTAGCATCCCGTAGCTACGCTCATTGTTTCGTAGCTACGTGACCTTGAACGT
AGTGAGGTC	Kf-Ef_synthetic	AGCTACGGGGTGGGGCCGCTAGCTACGTTCAAGGTCACGT
AGTGATACT	Kr-Of-Ef_synthetic	AGCTAGCGGCCCCACCCCGTAGCTACGGGATGCTAATCGTAGCTACGTTCAAGGTCACGT
AGTGATCTG	Ef-Or-Sf-Kf_synthetic	AGCTACGTTCAAGGTCACGTAGCTACGATTAGCATCCCGTAGCTACGCTCATTGTTTCGTAGCTACGGGGTGGGGCCGCT
AGTGCAGCC	Of-Ef-Kr-Sr_synthetic	AGCTACGGGATGCTAATCGTAGCTACGTTCAAGGTCACGTAGCTAGCGGCCCCACCCCGTAGCTACGAAACAATGAGCGT
AGTGCTAGG	Or-Kr-Ef_synthetic	AGCTACGATTAGCATCCCGTAGCTAGCGGCCCCACCCCGTAGCTACGTTCAAGGTCACGT
AGTGGAAGC	Ef-Kf-Or-Sr_synthetic	AGCTACGTTCAAGGTCACGTAGCTACGGGGTGGGGCCGCTAGCTACGATTAGCATCCCGTAGCTACGAAACAATGAGCGT
AGTGGACAT	Or-Sr-Er-Kf_synthetic	AGCTACGATTAGCATCCCGTAGCTACGAAACAATGAGCGTAGCTACGTGACCTTGAACGTAGCTACGGGGTGGGGCCGCT
AGTGGCGAC	Sf-Er-Kf_synthetic	AGCTACGCTCATTGTTTCGTAGCTACGTGACCTTGAACGTAGCTACGGGGTGGGGCCGCT
AGTGGCTCT	Kr-Sf-Er_synthetic	AGCTAGCGGCCCCACCCCGTAGCTACGCTCATTGTTTCGTAGCTACGTGACCTTGAACGT
AGTGGTGAT	Sr-Kr-Of-Er_synthetic	AGCTACGAAACAATGAGCGTAGCTAGCGGCCCCACCCCGTAGCTACGGGATGCTAATCGTAGCTACGTGACCTTGAACGT
AGTGTACAA	Kr-Or_synthetic	AGCTAGCGGCCCCACCCCGTAGCTACGATTAGCATCCCGT
AGTGTCGCC	Or-Ef-Sr_synthetic	AGCTACGATTAGCATCCCGTAGCTACGTTCAAGGTCACGTAGCTACGAAACAATGAGCGT
AGTGTCGTT	Sf-Ef-Or-Kf_synthetic	AGCTACGCTCATTGTTTCGTAGCTACGTTCAAGGTCACGTAGCTACGATTAGCATCCCGTAGCTACGGGGTGGGGCCGCT
AGTGTGTCA	Ef-Kf-Sf-Of_synthetic	AGCTACGTTCAAGGTCACGTAGCTACGGGGTGGGGCCGCTAGCTACGCTCATTGTTTCGTAGCTACGGGATGCTAATCGT
AGTGTTTGT	Or-Er-Kf-Sr_synthetic	AGCTACGATTAGCATCCCGTAGCTACGTGACCTTGAACGTAGCTACGGGGTGGGGCCGCTAGCTACGAAACAATGAGCGT
AGTTAACGG	Or-Ef-Kf-Sr_synthetic	AGCTACGATTAGCATCCCGTAGCTACGTTCAAGGTCACGTAGCTACGGGGTGGGGCCGCTAGCTACGAAACAATGAGCGT
AGTTAAGCG	Kr-Or-Er-Sf_synthetic	AGCTAGCGGCCCCACCCCGTAGCTACGATTAGCATCCCGTAGCTACGTGACCTTGAACGTAGCTACGCTCATTGTTTCGT
AGTTAAGGA	Kf-Ef-Sr-Of_synthetic	AGCTACGGGGTGGGGCCGCTAGCTACGTTCAAGGTCACGTAGCTACGAAACAATGAGCGTAGCTACGGGATGCTAATCGT
AGTTACGAT	Er-Or-Kr-Sf_synthetic	AGCTACGTGACCTTGAACGTAGCTACGATTAGCATCCCGTAGCTAGCGGCCCCACCCCGTAGCTACGCTCATTGTTTCGT
AGTTAGTCC	Kf-Er-Sf_synthetic	AGCTACGGGGTGGGGCCGCTAGCTACGTGACCTTGAACGTAGCTACGCTCATTGTTTCGT
AGTTATCGC	Of-Er_synthetic	AGCTACGGGATGCTAATCGTAGCTACGTGACCTTGAACGT
AGTTCAACC	Kr-Sr-Of_synthetic	AGCTAGCGGCCCCACCCCGTAGCTACGAAACAATGAGCGTAGCTACGGGATGCTAATCGT
AGTTCACAG	Er-Or-Sf-Kf_synthetic	AGCTACGTGACCTTGAACGTAGCTACGATTAGCATCCCGTAGCTACGCTCATTGTTTCGTAGCTACGGGGTGGGGCCGCT
AGTTCCACA	Kr-Of-Sr-Ef_synthetic	AGCTAGCGGCCCCACCCCGTAGCTACGGGATGCTAATCGTAGCTACGAAACAATGAGCGTAGCTACGTTCAAGGTCACGT
AGTTCCTGT	Of-Kf-Ef_synthetic	AGCTACGGGATGCTAATCGTAGCTACGGGGTGGGGCCGCTAGCTACGTTCAAGGTCACGT
AGTTCGGTT	Sf-Ef-Kr-Of_synthetic	AGCTACGCTCATTGTTTCGTAGCTACGTTCAAGGTCACGTAGCTAGCGGCCCCACCCCGTAGCTACGGGATGCTAATCGT
AGTTCTCCT	Sr-Of-Kr-Ef_synthetic	AGCTACGAAACAATGAGCGTAGCTACGGGATGCTAATCGTAGCTAGCGGCCCCACCCCGTAGCTACGTTCAAGGTCACGT
AGTTGAAGG	Er-Or-Sf_synthetic	AGCTACGTGACCTTGAACGTAGCTACGATTAGCATCCCGTAGCTACGCTCATTGTTTCGT
AGTTGAGGT	Sf-Kf_synthetic	AGCTACGCTCATTGTTTCGTAGCTACGGGGTGGGGCCGCT
AGTTGGGCA	Kr-Sf-Of-Er_synthetic	AGCTAGCGGCCCCACCCCGTAGCTACGCTCATTGTTTCGTAGCTACGGGATGCTAATCGTAGCTACGTGACCTTGAACGT
AGTTGGTGG	Kr-Ef-Or_synthetic	AGCTAGCGGCCCCACCCCGTAGCTACGTTCAAGGTCACGTAGCTACGATTAGCATCCCGT
AGTTGTGTG	Of-Kf-Sr_synthetic	AGCTACGGGATGCTAATCGTAGCTACGGGGTGGGGCCGCTAGCTACGAAACAATGAGCGT
AGTTGTTGT	Of-Ef-Kr-Sr_synthetic	AGCTACGGGATGCTAATCGTAGCTACGTTCAAGGTCACGTAGCTAGCGGCCCCACCCCGTAGCTACGAAACAATGAGCGT
AGTTTCCGC	Sr-Ef-Or-Kr_synthetic	AGCTACGAAACAATGAGCGTAGCTACGTTCAAGGTCACGTAGCTACGATTAGCATCCCGTAGCTAGCGGCCCCACCCCGT
AGTTTCGTC	Kf-Sf-Er-Of_synthetic	AGCTACGGGGTGGGGCCGCTAGCTACGCTCATTGTTTCGTAGCTACGTGACCTTGAACGTAGCTACGGGATGCTAATCGT
ATAAAGAGG	Kr-Sf-Or-Ef_synthetic	AGCTAGCGGCCCCACCCCGTAGCTACGCTCATTGTTTCGTAGCTACGATTAGCATCCCGTAGCTACGTTCAAGGTCACGT
ATAAAGGAC	Kr-Er-Sr-Of_synthetic	AGCTAGCGGCCCCACCCCGTAGCTACGTGACCTTGAACGTAGCTACGAAACAATGAGCGTAGCTACGGGATGCTAATCGT
ATAACAGAG	Ef-Kr-Or-Sf_synthetic	AGCTACGTTCAAGGTCACGTAGCTAGCGGCCCCACCCCGTAGCTACGATTAGCATCCCGTAGCTACGCTCATTGTTTCGT
ATAACCTTG	Of-Ef-Kf_synthetic	AGCTACGGGATGCTAATCGTAGCTACGTTCAAGGTCACGTAGCTACGGGGTGGGGCCGCT
ATAACGAAC	Basal
ATAACGGCG	Of-Kr-Sr_synthetic	AGCTACGGGATGCTAATCGTAGCTAGCGGCCCCACCCCGTAGCTACGAAACAATGAGCGT
ATAACGTAG	Er-Sf-Of_synthetic	AGCTACGTGACCTTGAACGTAGCTACGCTCATTGTTTCGTAGCTACGGGATGCTAATCGT
ATAAGAGAC	Kr-Sr-Of_synthetic	AGCTAGCGGCCCCACCCCGTAGCTACGAAACAATGAGCGTAGCTACGGGATGCTAATCGT
ATAAGCGCT	Or-Er-Kf_synthetic	AGCTACGATTAGCATCCCGTAGCTACGTGACCTTGAACGTAGCTACGGGGTGGGGCCGCT
ATAAGCTAC	Or-Sr-Ef-Kf_synthetic	AGCTACGATTAGCATCCCGTAGCTACGAAACAATGAGCGTAGCTACGTTCAAGGTCACGTAGCTACGGGGTGGGGCCGCT
ATAAGGGAA	Or-Er-Sr_synthetic	AGCTACGATTAGCATCCCGTAGCTACGTGACCTTGAACGTAGCTACGAAACAATGAGCGT
ATAAGTGGC	Kr-Er-Sr-Of_synthetic	AGCTAGCGGCCCCACCCCGTAGCTACGTGACCTTGAACGTAGCTACGAAACAATGAGCGTAGCTACGGGATGCTAATCGT
ATAATCCTG	Or-Er-Sr_synthetic	AGCTACGATTAGCATCCCGTAGCTACGTGACCTTGAACGTAGCTACGAAACAATGAGCGT
ATAATCGCG	Ef-Kr-Of_synthetic	AGCTACGTTCAAGGTCACGTAGCTAGCGGCCCCACCCCGTAGCTACGGGATGCTAATCGT
ATAATGCCT	Er-Kf-Or_synthetic	AGCTACGTGACCTTGAACGTAGCTACGGGGTGGGGCCGCTAGCTACGATTAGCATCCCGT
ATACACGTG	Kr-Sf-Or-Ef_synthetic	AGCTAGCGGCCCCACCCCGTAGCTACGCTCATTGTTTCGTAGCTACGATTAGCATCCCGTAGCTACGTTCAAGGTCACGT
ATACACTCA	Of-Kf-Sr_synthetic	AGCTACGGGATGCTAATCGTAGCTACGGGGTGGGGCCGCTAGCTACGAAACAATGAGCGT
ATACACTGG	Kf-Ef-Or_synthetic	AGCTACGGGGTGGGGCCGCTAGCTACGTTCAAGGTCACGTAGCTACGATTAGCATCCCGT
ATACAGTTC	Sr-Er-Of-Kf_synthetic	AGCTACGAAACAATGAGCGTAGCTACGTGACCTTGAACGTAGCTACGGGATGCTAATCGTAGCTACGGGGTGGGGCCGCT
ATACATTCC	Er-Sr-Kr-Of_synthetic	AGCTACGTGACCTTGAACGTAGCTACGAAACAATGAGCGTAGCTAGCGGCCCCACCCCGTAGCTACGGGATGCTAATCGT
ATACCAAAC	Kf-Er-Sf-Of_synthetic	AGCTACGGGGTGGGGCCGCTAGCTACGTGACCTTGAACGTAGCTACGCTCATTGTTTCGTAGCTACGGGATGCTAATCGT
ATACCACCA	Sr-Of-Kf-Ef_synthetic	AGCTACGAAACAATGAGCGTAGCTACGGGATGCTAATCGTAGCTACGGGGTGGGGCCGCTAGCTACGTTCAAGGTCACGT
ATACCATCG	Or-Sf-Kf-Er_synthetic	AGCTACGATTAGCATCCCGTAGCTACGCTCATTGTTTCGTAGCTACGGGGTGGGGCCGCTAGCTACGTGACCTTGAACGT
ATACCCGGT	Ef-Or-Kf-Sf_synthetic	AGCTACGTTCAAGGTCACGTAGCTACGATTAGCATCCCGTAGCTACGGGGTGGGGCCGCTAGCTACGCTCATTGTTTCGT
ATACCCTAG	Sr-Of-Kr-Er_synthetic	AGCTACGAAACAATGAGCGTAGCTACGGGATGCTAATCGTAGCTAGCGGCCCCACCCCGTAGCTACGTGACCTTGAACGT
ATACCGGAC	Basal
ATACCGTTA	Sr-Of-Ef-Kr_synthetic	AGCTACGAAACAATGAGCGTAGCTACGGGATGCTAATCGTAGCTACGTTCAAGGTCACGTAGCTAGCGGCCCCACCCCGT
ATACCTGCT	Of-Kr-Sr_synthetic	AGCTACGGGATGCTAATCGTAGCTAGCGGCCCCACCCCGTAGCTACGAAACAATGAGCGT
ATACGACGT	Sr-Kf-Of-Er_synthetic	AGCTACGAAACAATGAGCGTAGCTACGGGGTGGGGCCGCTAGCTACGGGATGCTAATCGTAGCTACGTGACCTTGAACGT
ATACGCGCC	Or-Sr-Er-Kf_synthetic	AGCTACGATTAGCATCCCGTAGCTACGAAACAATGAGCGTAGCTACGTGACCTTGAACGTAGCTACGGGGTGGGGCCGCT
ATACGGAAT	Of-Kf-Sr_synthetic	AGCTACGGGATGCTAATCGTAGCTACGGGGTGGGGCCGCTAGCTACGAAACAATGAGCGT
ATACGGGAG	Er-Kf-Or-Sf_synthetic	AGCTACGTGACCTTGAACGTAGCTACGGGGTGGGGCCGCTAGCTACGATTAGCATCCCGTAGCTACGCTCATTGTTTCGT
ATACGGGTT	Er-Kf-Sf-Or_synthetic	AGCTACGTGACCTTGAACGTAGCTACGGGGTGGGGCCGCTAGCTACGCTCATTGTTTCGTAGCTACGATTAGCATCCCGT
ATACGGTGG	Sf-Or-Er-Kf_synthetic	AGCTACGCTCATTGTTTCGTAGCTACGATTAGCATCCCGTAGCTACGTGACCTTGAACGTAGCTACGGGGTGGGGCCGCT
ATACGTCCT	Or-Sr-Ef-Kr_synthetic	AGCTACGATTAGCATCCCGTAGCTACGAAACAATGAGCGTAGCTACGTTCAAGGTCACGTAGCTAGCGGCCCCACCCCGT
ATACTACGA	Sr-Kf-Or-Ef_synthetic	AGCTACGAAACAATGAGCGTAGCTACGGGGTGGGGCCGCTAGCTACGATTAGCATCCCGTAGCTACGTTCAAGGTCACGT
ATACTCAGG	Sr-Kr-Ef-Or_synthetic	AGCTACGAAACAATGAGCGTAGCTAGCGGCCCCACCCCGTAGCTACGTTCAAGGTCACGTAGCTACGATTAGCATCCCGT
ATACTGAAC	Kr-Of-Sf-Er_synthetic	AGCTAGCGGCCCCACCCCGTAGCTACGGGATGCTAATCGTAGCTACGCTCATTGTTTCGTAGCTACGTGACCTTGAACGT
ATACTGCCC	Er-Sr-Of-Kf_synthetic	AGCTACGTGACCTTGAACGTAGCTACGAAACAATGAGCGTAGCTACGGGATGCTAATCGTAGCTACGGGGTGGGGCCGCT
ATACTTCCA	Ef-Kr-Or-Sr_synthetic	AGCTACGTTCAAGGTCACGTAGCTAGCGGCCCCACCCCGTAGCTACGATTAGCATCCCGTAGCTACGAAACAATGAGCGT
ATAGAACAC	Sf-Or_synthetic	AGCTACGCTCATTGTTTCGTAGCTACGATTAGCATCCCGT
ATAGACAGT	Of-Kf_synthetic	AGCTACGGGATGCTAATCGTAGCTACGGGGTGGGGCCGCT
ATAGACGGG	Ef-Kf-Of-Sr_synthetic	AGCTACGTTCAAGGTCACGTAGCTACGGGGTGGGGCCGCTAGCTACGGGATGCTAATCGTAGCTACGAAACAATGAGCGT
ATAGAGCAG	Kr-Sf-Er-Or_synthetic	AGCTAGCGGCCCCACCCCGTAGCTACGCTCATTGTTTCGTAGCTACGTGACCTTGAACGTAGCTACGATTAGCATCCCGT
ATAGAGTGG	Sf-Of-Kr-Er_synthetic	AGCTACGCTCATTGTTTCGTAGCTACGGGATGCTAATCGTAGCTAGCGGCCCCACCCCGTAGCTACGTGACCTTGAACGT
ATAGCACCC	Kr-Sr-Er-Of_synthetic	AGCTAGCGGCCCCACCCCGTAGCTACGAAACAATGAGCGTAGCTACGTGACCTTGAACGTAGCTACGGGATGCTAATCGT
ATAGCACTA	Er-Sf-Kr-Of_synthetic	AGCTACGTGACCTTGAACGTAGCTACGCTCATTGTTTCGTAGCTAGCGGCCCCACCCCGTAGCTACGGGATGCTAATCGT
ATAGCAGGC	Ef-Sr-Kf-Of_synthetic	AGCTACGTTCAAGGTCACGTAGCTACGAAACAATGAGCGTAGCTACGGGGTGGGGCCGCTAGCTACGGGATGCTAATCGT
ATAGCGCCA	Of-Er-Sr-Kf_synthetic	AGCTACGGGATGCTAATCGTAGCTACGTGACCTTGAACGTAGCTACGAAACAATGAGCGTAGCTACGGGGTGGGGCCGCT
ATAGCTAGG	Er-Sr_synthetic	AGCTACGTGACCTTGAACGTAGCTACGAAACAATGAGCGT
ATAGCTCGT	Sr-Kr-Ef-Of_synthetic	AGCTACGAAACAATGAGCGTAGCTAGCGGCCCCACCCCGTAGCTACGTTCAAGGTCACGTAGCTACGGGATGCTAATCGT
ATAGCTGAT	Kr-Ef-Sf-Or_synthetic	AGCTAGCGGCCCCACCCCGTAGCTACGTTCAAGGTCACGTAGCTACGCTCATTGTTTCGTAGCTACGATTAGCATCCCGT
ATAGCTGTA	Er-Or-Sr_synthetic	AGCTACGTGACCTTGAACGTAGCTACGATTAGCATCCCGTAGCTACGAAACAATGAGCGT
ATAGCTTCG	Er-Sf-Kf-Of_synthetic	AGCTACGTGACCTTGAACGTAGCTACGCTCATTGTTTCGTAGCTACGGGGTGGGGCCGCTAGCTACGGGATGCTAATCGT
ATAGGACAG	Of-Kr-Sr-Ef_synthetic	AGCTACGGGATGCTAATCGTAGCTAGCGGCCCCACCCCGTAGCTACGAAACAATGAGCGTAGCTACGTTCAAGGTCACGT
ATAGGAGCT	Ef-Kr-Of-Sr_synthetic	AGCTACGTTCAAGGTCACGTAGCTAGCGGCCCCACCCCGTAGCTACGGGATGCTAATCGTAGCTACGAAACAATGAGCGT
ATAGGATGC	Sf-Kf-Or-Ef_synthetic	AGCTACGCTCATTGTTTCGTAGCTACGGGGTGGGGCCGCTAGCTACGATTAGCATCCCGTAGCTACGTTCAAGGTCACGT
ATAGTCCCG	Sr-Of-Kf-Ef_synthetic	AGCTACGAAACAATGAGCGTAGCTACGGGATGCTAATCGTAGCTACGGGGTGGGGCCGCTAGCTACGTTCAAGGTCACGT
ATAGTCCTT	Ef-Or-Kr_synthetic	AGCTACGTTCAAGGTCACGTAGCTACGATTAGCATCCCGTAGCTAGCGGCCCCACCCCGT
ATAGTCGAA	Ef-Sf-Or_synthetic	AGCTACGTTCAAGGTCACGTAGCTACGCTCATTGTTTCGTAGCTACGATTAGCATCCCGT
ATAGTGCGT	Or-Kr-Ef-Sf_synthetic	AGCTACGATTAGCATCCCGTAGCTAGCGGCCCCACCCCGTAGCTACGTTCAAGGTCACGTAGCTACGCTCATTGTTTCGT
ATATACCGT	Sf-Kf-Ef-Or_synthetic	AGCTACGCTCATTGTTTCGTAGCTACGGGGTGGGGCCGCTAGCTACGTTCAAGGTCACGTAGCTACGATTAGCATCCCGT
ATATAGAGC	Kr-Or-Er_synthetic	AGCTAGCGGCCCCACCCCGTAGCTACGATTAGCATCCCGTAGCTACGTGACCTTGAACGT
ATATAGCCA	Sf-Kf-Or_synthetic	AGCTACGCTCATTGTTTCGTAGCTACGGGGTGGGGCCGCTAGCTACGATTAGCATCCCGT
ATATCCCTA	Sr-Of-Kf-Ef_synthetic	AGCTACGAAACAATGAGCGTAGCTACGGGATGCTAATCGTAGCTACGGGGTGGGGCCGCTAGCTACGTTCAAGGTCACGT
ATATCCGTG	Or-Sr-Kr-Er_synthetic	AGCTACGATTAGCATCCCGTAGCTACGAAACAATGAGCGTAGCTAGCGGCCCCACCCCGTAGCTACGTGACCTTGAACGT
ATATCCTTC	Er-Sf-Of-Kr_synthetic	AGCTACGTGACCTTGAACGTAGCTACGCTCATTGTTTCGTAGCTACGGGATGCTAATCGTAGCTAGCGGCCCCACCCCGT
ATATCGGGA	Sf-Of-Kr-Er_synthetic	AGCTACGCTCATTGTTTCGTAGCTACGGGATGCTAATCGTAGCTAGCGGCCCCACCCCGTAGCTACGTGACCTTGAACGT
ATATCTCCG	Kr-Sr-Er-Or_synthetic	AGCTAGCGGCCCCACCCCGTAGCTACGAAACAATGAGCGTAGCTACGTGACCTTGAACGTAGCTACGATTAGCATCCCGT
ATATGAACG	Er-Kf-Sf-Or_synthetic	AGCTACGTGACCTTGAACGTAGCTACGGGGTGGGGCCGCTAGCTACGCTCATTGTTTCGTAGCTACGATTAGCATCCCGT
ATATGCACC	Ef-Kf-Or_synthetic	AGCTACGTTCAAGGTCACGTAGCTACGGGGTGGGGCCGCTAGCTACGATTAGCATCCCGT
ATATGCTGT	Kf-Sf-Ef-Or_synthetic	AGCTACGGGGTGGGGCCGCTAGCTACGCTCATTGTTTCGTAGCTACGTTCAAGGTCACGTAGCTACGATTAGCATCCCGT
ATATGGCTA	Sr-Kf-Of-Ef_synthetic	AGCTACGAAACAATGAGCGTAGCTACGGGGTGGGGCCGCTAGCTACGGGATGCTAATCGTAGCTACGTTCAAGGTCACGT
ATATGGGCA	Er-Of-Sr-Kf_synthetic	AGCTACGTGACCTTGAACGTAGCTACGGGATGCTAATCGTAGCTACGAAACAATGAGCGTAGCTACGGGGTGGGGCCGCT
ATATGGGTG	Er-Of-Kf_synthetic	AGCTACGTGACCTTGAACGTAGCTACGGGATGCTAATCGTAGCTACGGGGTGGGGCCGCT
ATCAACAAC	Kr-Sr-Of-Er_synthetic	AGCTAGCGGCCCCACCCCGTAGCTACGAAACAATGAGCGTAGCTACGGGATGCTAATCGTAGCTACGTGACCTTGAACGT
ATCAACTCT	Of-Ef-Kr_synthetic	AGCTACGGGATGCTAATCGTAGCTACGTTCAAGGTCACGTAGCTAGCGGCCCCACCCCGT
ATCAAGCTC	Sf-Kf-Or_synthetic	AGCTACGCTCATTGTTTCGTAGCTACGGGGTGGGGCCGCTAGCTACGATTAGCATCCCGT
ATCAAGTCA	Sf-Kr_synthetic	AGCTACGCTCATTGTTTCGTAGCTAGCGGCCCCACCCCGT
ATCAATTCG	Er-Kr-Sr-Or_synthetic	AGCTACGTGACCTTGAACGTAGCTAGCGGCCCCACCCCGTAGCTACGAAACAATGAGCGTAGCTACGATTAGCATCCCGT
ATCACACGC	Or-Sf-Er_synthetic	AGCTACGATTAGCATCCCGTAGCTACGCTCATTGTTTCGTAGCTACGTGACCTTGAACGT
ATCACCGCA	Sr-Ef-Or_synthetic	AGCTACGAAACAATGAGCGTAGCTACGTTCAAGGTCACGTAGCTACGATTAGCATCCCGT
ATCACTCGG	Kr-Of-Sr-Er_synthetic	AGCTAGCGGCCCCACCCCGTAGCTACGGGATGCTAATCGTAGCTACGAAACAATGAGCGTAGCTACGTGACCTTGAACGT
ATCACTTGT	Basal
ATCAGAGGG	Or-Kr-Er-Sf_synthetic	AGCTACGATTAGCATCCCGTAGCTAGCGGCCCCACCCCGTAGCTACGTGACCTTGAACGTAGCTACGCTCATTGTTTCGT
ATCAGCTAG	Sf-Ef-Or_synthetic	AGCTACGCTCATTGTTTCGTAGCTACGTTCAAGGTCACGTAGCTACGATTAGCATCCCGT
ATCAGGAAC	Er-Sr-Kf-Or_synthetic	AGCTACGTGACCTTGAACGTAGCTACGAAACAATGAGCGTAGCTACGGGGTGGGGCCGCTAGCTACGATTAGCATCCCGT
ATCAGGCAT	Ef-Of-Sr-Kf_synthetic	AGCTACGTTCAAGGTCACGTAGCTACGGGATGCTAATCGTAGCTACGAAACAATGAGCGTAGCTACGGGGTGGGGCCGCT
ATCAGGTGA	Of-Sf-Kf-Ef_synthetic	AGCTACGGGATGCTAATCGTAGCTACGCTCATTGTTTCGTAGCTACGGGGTGGGGCCGCTAGCTACGTTCAAGGTCACGT
ATCAGTTGG	Er-Sr-Or-Kr_synthetic	AGCTACGTGACCTTGAACGTAGCTACGAAACAATGAGCGTAGCTACGATTAGCATCCCGTAGCTAGCGGCCCCACCCCGT
ATCATCCAG	Sf-Kr-Ef-Of_synthetic	AGCTACGCTCATTGTTTCGTAGCTAGCGGCCCCACCCCGTAGCTACGTTCAAGGTCACGTAGCTACGGGATGCTAATCGT
ATCATCGAA	Sf-Ef-Of-Kf_synthetic	AGCTACGCTCATTGTTTCGTAGCTACGTTCAAGGTCACGTAGCTACGGGATGCTAATCGTAGCTACGGGGTGGGGCCGCT
ATCATGCGC	Sf-Kf-Or-Ef_synthetic	AGCTACGCTCATTGTTTCGTAGCTACGGGGTGGGGCCGCTAGCTACGATTAGCATCCCGTAGCTACGTTCAAGGTCACGT
ATCCAACTA	Er-Or-Kr-Sr_synthetic	AGCTACGTGACCTTGAACGTAGCTACGATTAGCATCCCGTAGCTAGCGGCCCCACCCCGTAGCTACGAAACAATGAGCGT
ATCCACGCC	Kr-Of-Ef-Sf_synthetic	AGCTAGCGGCCCCACCCCGTAGCTACGGGATGCTAATCGTAGCTACGTTCAAGGTCACGTAGCTACGCTCATTGTTTCGT
ATCCAGGTT	Ef-Kf-Sf-Or_synthetic	AGCTACGTTCAAGGTCACGTAGCTACGGGGTGGGGCCGCTAGCTACGCTCATTGTTTCGTAGCTACGATTAGCATCCCGT
ATCCATGCA	Ef-Or-Kr-Sf_synthetic	AGCTACGTTCAAGGTCACGTAGCTACGATTAGCATCCCGTAGCTAGCGGCCCCACCCCGTAGCTACGCTCATTGTTTCGT
ATCCATGGG	Er-Of-Sf-Kr_synthetic	AGCTACGTGACCTTGAACGTAGCTACGGGATGCTAATCGTAGCTACGCTCATTGTTTCGTAGCTAGCGGCCCCACCCCGT
ATCCCAAGT	Kf-Sf-Of-Ef_synthetic	AGCTACGGGGTGGGGCCGCTAGCTACGCTCATTGTTTCGTAGCTACGGGATGCTAATCGTAGCTACGTTCAAGGTCACGT
ATCCCACGG	Er-Sf-Kr_synthetic	AGCTACGTGACCTTGAACGTAGCTACGCTCATTGTTTCGTAGCTAGCGGCCCCACCCCGT
ATCCCGAGG	Sr-Kf-Of_synthetic	AGCTACGAAACAATGAGCGTAGCTACGGGGTGGGGCCGCTAGCTACGGGATGCTAATCGT
ATCCCTTGG	Er-Kr-Sr_synthetic	AGCTACGTGACCTTGAACGTAGCTAGCGGCCCCACCCCGTAGCTACGAAACAATGAGCGT
ATCCGATAT	Sf-Or-Ef-Kf_synthetic	AGCTACGCTCATTGTTTCGTAGCTACGATTAGCATCCCGTAGCTACGTTCAAGGTCACGTAGCTACGGGGTGGGGCCGCT
ATCCGATTG	Or-Sf_synthetic	AGCTACGATTAGCATCCCGTAGCTACGCTCATTGTTTCGT
ATCCGCCTC	Er-Sr-Or-Kr_synthetic	AGCTACGTGACCTTGAACGTAGCTACGAAACAATGAGCGTAGCTACGATTAGCATCCCGTAGCTAGCGGCCCCACCCCGT
ATCCGGAAA	Sr-Kf-Or-Ef_synthetic	AGCTACGAAACAATGAGCGTAGCTACGGGGTGGGGCCGCTAGCTACGATTAGCATCCCGTAGCTACGTTCAAGGTCACGT
ATCCGGCAG	Sf-Ef-Kf-Or_synthetic	AGCTACGCTCATTGTTTCGTAGCTACGTTCAAGGTCACGTAGCTACGGGGTGGGGCCGCTAGCTACGATTAGCATCCCGT
ATCCGGTTA	Or-Er-Sr_synthetic	AGCTACGATTAGCATCCCGTAGCTACGTGACCTTGAACGTAGCTACGAAACAATGAGCGT
ATCCGTCAA	Kf-Ef-Or_synthetic	AGCTACGGGGTGGGGCCGCTAGCTACGTTCAAGGTCACGTAGCTACGATTAGCATCCCGT
ATCCTCGGT	Sr-Kr_synthetic	AGCTACGAAACAATGAGCGTAGCTAGCGGCCCCACCCCGT
ATCCTGGAT	Kf-Of-Sf-Ef_synthetic	AGCTACGGGGTGGGGCCGCTAGCTACGGGATGCTAATCGTAGCTACGCTCATTGTTTCGTAGCTACGTTCAAGGTCACGT
ATCGACGCT	Kf-Sr-Ef-Of_synthetic	AGCTACGGGGTGGGGCCGCTAGCTACGAAACAATGAGCGTAGCTACGTTCAAGGTCACGTAGCTACGGGATGCTAATCGT
ATCGAGACC	Sf-Er-Or-Kf_synthetic	AGCTACGCTCATTGTTTCGTAGCTACGTGACCTTGAACGTAGCTACGATTAGCATCCCGTAGCTACGGGGTGGGGCCGCT
ATCGAGATA	Or-Ef_synthetic	AGCTACGATTAGCATCCCGTAGCTACGTTCAAGGTCACGT
ATCGAGTGC	Kf-Ef-Or-Sr_synthetic	AGCTACGGGGTGGGGCCGCTAGCTACGTTCAAGGTCACGTAGCTACGATTAGCATCCCGTAGCTACGAAACAATGAGCGT
ATCGATAGT	Of-Kf-Ef-Sr_synthetic	AGCTACGGGATGCTAATCGTAGCTACGGGGTGGGGCCGCTAGCTACGTTCAAGGTCACGTAGCTACGAAACAATGAGCGT
ATCGATTCC	Kr-Sr-Of-Ef_synthetic	AGCTAGCGGCCCCACCCCGTAGCTACGAAACAATGAGCGTAGCTACGGGATGCTAATCGTAGCTACGTTCAAGGTCACGT
ATCGCACGT	Kf-Sr-Er-Of_synthetic	AGCTACGGGGTGGGGCCGCTAGCTACGAAACAATGAGCGTAGCTACGTGACCTTGAACGTAGCTACGGGATGCTAATCGT
ATCGCGAGA	Of-Kf_synthetic	AGCTACGGGATGCTAATCGTAGCTACGGGGTGGGGCCGCT
ATCGCGGAT	Sf-Kf-Ef-Or_synthetic	AGCTACGCTCATTGTTTCGTAGCTACGGGGTGGGGCCGCTAGCTACGTTCAAGGTCACGTAGCTACGATTAGCATCCCGT
ATCGCTACA	Or-Ef-Sf_synthetic	AGCTACGATTAGCATCCCGTAGCTACGTTCAAGGTCACGTAGCTACGCTCATTGTTTCGT
ATCGCTCAT	Or-Sr-Kf_synthetic	AGCTACGATTAGCATCCCGTAGCTACGAAACAATGAGCGTAGCTACGGGGTGGGGCCGCT
ATCGGACAA	Sr-Or-Er_synthetic	AGCTACGAAACAATGAGCGTAGCTACGATTAGCATCCCGTAGCTACGTGACCTTGAACGT
ATCGGAGGT	Sr-Or-Er-Kf_synthetic	AGCTACGAAACAATGAGCGTAGCTACGATTAGCATCCCGTAGCTACGTGACCTTGAACGTAGCTACGGGGTGGGGCCGCT
ATCGGCTGA	Of-Kr-Ef-Sr_synthetic	AGCTACGGGATGCTAATCGTAGCTAGCGGCCCCACCCCGTAGCTACGTTCAAGGTCACGTAGCTACGAAACAATGAGCGT
ATCGGGCTT	Kr-Or-Sr-Ef_synthetic	AGCTAGCGGCCCCACCCCGTAGCTACGATTAGCATCCCGTAGCTACGAAACAATGAGCGTAGCTACGTTCAAGGTCACGT
ATCGGTACT	Er-Sr-Kf-Or_synthetic	AGCTACGTGACCTTGAACGTAGCTACGAAACAATGAGCGTAGCTACGGGGTGGGGCCGCTAGCTACGATTAGCATCCCGT
ATCGGTCGG	Sf-Er-Kf_synthetic	AGCTACGCTCATTGTTTCGTAGCTACGTGACCTTGAACGTAGCTACGGGGTGGGGCCGCT
ATCGGTTAC	Kf-Or-Sf-Ef_synthetic	AGCTACGGGGTGGGGCCGCTAGCTACGATTAGCATCCCGTAGCTACGCTCATTGTTTCGTAGCTACGTTCAAGGTCACGT
ATCGTACAT	Of-Kf-Er_synthetic	AGCTACGGGATGCTAATCGTAGCTACGGGGTGGGGCCGCTAGCTACGTGACCTTGAACGT
ATCGTCATC	Or-Ef-Kr-Sf_synthetic	AGCTACGATTAGCATCCCGTAGCTACGTTCAAGGTCACGTAGCTAGCGGCCCCACCCCGTAGCTACGCTCATTGTTTCGT
ATCGTCGCC	Sr-Kr-Er_synthetic	AGCTACGAAACAATGAGCGTAGCTAGCGGCCCCACCCCGTAGCTACGTGACCTTGAACGT
ATCGTGAAG	Ef-Or-Sf-Kr_synthetic	AGCTACGTTCAAGGTCACGTAGCTACGATTAGCATCCCGTAGCTACGCTCATTGTTTCGTAGCTAGCGGCCCCACCCCGT
ATCGTGTAA	Kf-Sf-Of-Er_synthetic	AGCTACGGGGTGGGGCCGCTAGCTACGCTCATTGTTTCGTAGCTACGGGATGCTAATCGTAGCTACGTGACCTTGAACGT
ATCGTTCGA	Kr-Sr-Or-Ef_synthetic	AGCTAGCGGCCCCACCCCGTAGCTACGAAACAATGAGCGTAGCTACGATTAGCATCCCGTAGCTACGTTCAAGGTCACGT
ATCGTTCTT	Ef-Of-Kr_synthetic	AGCTACGTTCAAGGTCACGTAGCTACGGGATGCTAATCGTAGCTAGCGGCCCCACCCCGT
ATCTATCAG	Ef-Sr-Kr-Or_synthetic	AGCTACGTTCAAGGTCACGTAGCTACGAAACAATGAGCGTAGCTAGCGGCCCCACCCCGTAGCTACGATTAGCATCCCGT
ATCTATGAC	Of-Sr-Er-Kr_synthetic	AGCTACGGGATGCTAATCGTAGCTACGAAACAATGAGCGTAGCTACGTGACCTTGAACGTAGCTAGCGGCCCCACCCCGT
ATCTCAAGG	Sf-Of-Ef-Kr_synthetic	AGCTACGCTCATTGTTTCGTAGCTACGGGATGCTAATCGTAGCTACGTTCAAGGTCACGTAGCTAGCGGCCCCACCCCGT
ATCTCACCG	Kf-Sr-Ef-Of_synthetic	AGCTACGGGGTGGGGCCGCTAGCTACGAAACAATGAGCGTAGCTACGTTCAAGGTCACGTAGCTACGGGATGCTAATCGT
ATCTCATTG	Of-Kf-Sf-Ef_synthetic	AGCTACGGGATGCTAATCGTAGCTACGGGGTGGGGCCGCTAGCTACGCTCATTGTTTCGTAGCTACGTTCAAGGTCACGT
ATCTCGATA	Kf-Of-Sf-Er_synthetic	AGCTACGGGGTGGGGCCGCTAGCTACGGGATGCTAATCGTAGCTACGCTCATTGTTTCGTAGCTACGTGACCTTGAACGT
ATCTCTAGT	Kr-Sr-Ef-Or_synthetic	AGCTAGCGGCCCCACCCCGTAGCTACGAAACAATGAGCGTAGCTACGTTCAAGGTCACGTAGCTACGATTAGCATCCCGT
ATCTCTATG	Of-Ef-Sf-Kr_synthetic	AGCTACGGGATGCTAATCGTAGCTACGTTCAAGGTCACGTAGCTACGCTCATTGTTTCGTAGCTAGCGGCCCCACCCCGT
ATCTCTCAA	Sf-Kr-Ef-Or_synthetic	AGCTACGCTCATTGTTTCGTAGCTAGCGGCCCCACCCCGTAGCTACGTTCAAGGTCACGTAGCTACGATTAGCATCCCGT
ATCTGAGCG	Basal
ATCTGATGT	Sf-Kr_synthetic	AGCTACGCTCATTGTTTCGTAGCTAGCGGCCCCACCCCGT
ATCTGCATA	Kf-Sf-Or-Er_synthetic	AGCTACGGGGTGGGGCCGCTAGCTACGCTCATTGTTTCGTAGCTACGATTAGCATCCCGTAGCTACGTGACCTTGAACGT
ATCTGTCGA	Or-Kr-Sf-Er_synthetic	AGCTACGATTAGCATCCCGTAGCTAGCGGCCCCACCCCGTAGCTACGCTCATTGTTTCGTAGCTACGTGACCTTGAACGT
ATCTTACTG	Sr-Er-Or-Kf_synthetic	AGCTACGAAACAATGAGCGTAGCTACGTGACCTTGAACGTAGCTACGATTAGCATCCCGTAGCTACGGGGTGGGGCCGCT
ATCTTCAGC	Or-Er-Kf_synthetic	AGCTACGATTAGCATCCCGTAGCTACGTGACCTTGAACGTAGCTACGGGGTGGGGCCGCT
ATCTTCCCG	Ef-Sr-Kr-Of_synthetic	AGCTACGTTCAAGGTCACGTAGCTACGAAACAATGAGCGTAGCTAGCGGCCCCACCCCGTAGCTACGGGATGCTAATCGT
ATCTTCTAC	Kr-Sf-Ef_synthetic	AGCTAGCGGCCCCACCCCGTAGCTACGCTCATTGTTTCGTAGCTACGTTCAAGGTCACGT
ATCTTCTGT	Ef-Sr_synthetic	AGCTACGTTCAAGGTCACGTAGCTACGAAACAATGAGCGT
ATCTTGACT	Ef-Of-Kr-Sr_synthetic	AGCTACGTTCAAGGTCACGTAGCTACGGGATGCTAATCGTAGCTAGCGGCCCCACCCCGTAGCTACGAAACAATGAGCGT
ATCTTGCTA	Ef-Kr-Or-Sr_synthetic	AGCTACGTTCAAGGTCACGTAGCTAGCGGCCCCACCCCGTAGCTACGATTAGCATCCCGTAGCTACGAAACAATGAGCGT
ATCTTGGTG	Sr-Kf-Of-Ef_synthetic	AGCTACGAAACAATGAGCGTAGCTACGGGGTGGGGCCGCTAGCTACGGGATGCTAATCGTAGCTACGTTCAAGGTCACGT
ATCTTTCGT	Sf-Er-Or-Kf_synthetic	AGCTACGCTCATTGTTTCGTAGCTACGTGACCTTGAACGTAGCTACGATTAGCATCCCGTAGCTACGGGGTGGGGCCGCT
ATCTTTGGA	Kr-Of-Ef-Sf_synthetic	AGCTAGCGGCCCCACCCCGTAGCTACGGGATGCTAATCGTAGCTACGTTCAAGGTCACGTAGCTACGCTCATTGTTTCGT
ATGAACCGT	Kf-Ef-Of_synthetic	AGCTACGGGGTGGGGCCGCTAGCTACGTTCAAGGTCACGTAGCTACGGGATGCTAATCGT
ATGAAGACA	Er-Sf-Of-Kf_synthetic	AGCTACGTGACCTTGAACGTAGCTACGCTCATTGTTTCGTAGCTACGGGATGCTAATCGTAGCTACGGGGTGGGGCCGCT
ATGACACCG	Kr-Ef-Of-Sr_synthetic	AGCTAGCGGCCCCACCCCGTAGCTACGTTCAAGGTCACGTAGCTACGGGATGCTAATCGTAGCTACGAAACAATGAGCGT
ATGACCATT	Er-Of-Sr-Kf_synthetic	AGCTACGTGACCTTGAACGTAGCTACGGGATGCTAATCGTAGCTACGAAACAATGAGCGTAGCTACGGGGTGGGGCCGCT
ATGACCGCG	Kf-Sr-Or_synthetic	AGCTACGGGGTGGGGCCGCTAGCTACGAAACAATGAGCGTAGCTACGATTAGCATCCCGT
ATGACGACC	Sf-Kr-Ef_synthetic	AGCTACGCTCATTGTTTCGTAGCTAGCGGCCCCACCCCGTAGCTACGTTCAAGGTCACGT
ATGACGTAA	Sf-Kr-Ef_synthetic	AGCTACGCTCATTGTTTCGTAGCTAGCGGCCCCACCCCGTAGCTACGTTCAAGGTCACGT
ATGACGTTC	Or-Ef-Kf-Sr_synthetic	AGCTACGATTAGCATCCCGTAGCTACGTTCAAGGTCACGTAGCTACGGGGTGGGGCCGCTAGCTACGAAACAATGAGCGT
ATGACTCTA	Sf-Or_synthetic	AGCTACGCTCATTGTTTCGTAGCTACGATTAGCATCCCGT
ATGACTTTG	Sr-Kr_synthetic	AGCTACGAAACAATGAGCGTAGCTAGCGGCCCCACCCCGT
ATGAGACAG	Ef-Sr-Kr_synthetic	AGCTACGTTCAAGGTCACGTAGCTACGAAACAATGAGCGTAGCTAGCGGCCCCACCCCGT
ATGAGAGAA	Kf-Sf-Or-Ef_synthetic	AGCTACGGGGTGGGGCCGCTAGCTACGCTCATTGTTTCGTAGCTACGATTAGCATCCCGTAGCTACGTTCAAGGTCACGT
ATGAGAGTT	Basal
ATGAGGTCC	Sf-Or-Kf-Er_synthetic	AGCTACGCTCATTGTTTCGTAGCTACGATTAGCATCCCGTAGCTACGGGGTGGGGCCGCTAGCTACGTGACCTTGAACGT
ATGAGTTTC	Kr-Sf-Er_synthetic	AGCTAGCGGCCCCACCCCGTAGCTACGCTCATTGTTTCGTAGCTACGTGACCTTGAACGT
ATGATCGCC	Basal
ATGATGAGA	Or-Kf-Ef_synthetic	AGCTACGATTAGCATCCCGTAGCTACGGGGTGGGGCCGCTAGCTACGTTCAAGGTCACGT
ATGCAGCCG	Sr-Kf_synthetic	AGCTACGAAACAATGAGCGTAGCTACGGGGTGGGGCCGCT
ATGCATCGG	Kr-Ef-Of-Sr_synthetic	AGCTAGCGGCCCCACCCCGTAGCTACGTTCAAGGTCACGTAGCTACGGGATGCTAATCGTAGCTACGAAACAATGAGCGT
ATGCATGGA	Of-Ef-Kf-Sr_synthetic	AGCTACGGGATGCTAATCGTAGCTACGTTCAAGGTCACGTAGCTACGGGGTGGGGCCGCTAGCTACGAAACAATGAGCGT
ATGCCAAGC	Kf-Of-Ef-Sr_synthetic	AGCTACGGGGTGGGGCCGCTAGCTACGGGATGCTAATCGTAGCTACGTTCAAGGTCACGTAGCTACGAAACAATGAGCGT
ATGCCACCT	Or-Kr-Ef_synthetic	AGCTACGATTAGCATCCCGTAGCTAGCGGCCCCACCCCGTAGCTACGTTCAAGGTCACGT
ATGCCAGAC	Of-Sf-Er-Kr_synthetic	AGCTACGGGATGCTAATCGTAGCTACGCTCATTGTTTCGTAGCTACGTGACCTTGAACGTAGCTAGCGGCCCCACCCCGT
ATGCCTCGT	Of-Sr-Er_synthetic	AGCTACGGGATGCTAATCGTAGCTACGAAACAATGAGCGTAGCTACGTGACCTTGAACGT
ATGCGAGGA	Or-Sr-Kr_synthetic	AGCTACGATTAGCATCCCGTAGCTACGAAACAATGAGCGTAGCTAGCGGCCCCACCCCGT
ATGCGCAAT	Kr-Sr-Ef-Of_synthetic	AGCTAGCGGCCCCACCCCGTAGCTACGAAACAATGAGCGTAGCTACGTTCAAGGTCACGTAGCTACGGGATGCTAATCGT
ATGCGGGAA	Sf-Of-Kf_synthetic	AGCTACGCTCATTGTTTCGTAGCTACGGGATGCTAATCGTAGCTACGGGGTGGGGCCGCT
ATGCGTAAC	Sr-Of-Kf_synthetic	AGCTACGAAACAATGAGCGTAGCTACGGGATGCTAATCGTAGCTACGGGGTGGGGCCGCT
ATGCGTGCG	Er-Of_synthetic	AGCTACGTGACCTTGAACGTAGCTACGGGATGCTAATCGT
ATGCTAATG	Kr-Sr-Or_synthetic	AGCTAGCGGCCCCACCCCGTAGCTACGAAACAATGAGCGTAGCTACGATTAGCATCCCGT
ATGCTACAC	Ef-Kr-Sf-Or_synthetic	AGCTACGTTCAAGGTCACGTAGCTAGCGGCCCCACCCCGTAGCTACGCTCATTGTTTCGTAGCTACGATTAGCATCCCGT
ATGCTATGT	Or-Sf-Kf-Ef_synthetic	AGCTACGATTAGCATCCCGTAGCTACGCTCATTGTTTCGTAGCTACGGGGTGGGGCCGCTAGCTACGTTCAAGGTCACGT
ATGCTCCAG	Kr-Sr-Er_synthetic	AGCTAGCGGCCCCACCCCGTAGCTACGAAACAATGAGCGTAGCTACGTGACCTTGAACGT
ATGCTCGCA	Or-Sr-Kr-Ef_synthetic	AGCTACGATTAGCATCCCGTAGCTACGAAACAATGAGCGTAGCTAGCGGCCCCACCCCGTAGCTACGTTCAAGGTCACGT
ATGCTCTGC	Er-Sf-Kr-Of_synthetic	AGCTACGTGACCTTGAACGTAGCTACGCTCATTGTTTCGTAGCTAGCGGCCCCACCCCGTAGCTACGGGATGCTAATCGT
ATGCTGCTG	Kf-Sr-Er-Or_synthetic	AGCTACGGGGTGGGGCCGCTAGCTACGAAACAATGAGCGTAGCTACGTGACCTTGAACGTAGCTACGATTAGCATCCCGT
ATGCTGGTT	Kf-Er-Sr_synthetic	AGCTACGGGGTGGGGCCGCTAGCTACGTGACCTTGAACGTAGCTACGAAACAATGAGCGT
ATGCTTCAA	Kf-Sf-Er-Of_synthetic	AGCTACGGGGTGGGGCCGCTAGCTACGCTCATTGTTTCGTAGCTACGTGACCTTGAACGTAGCTACGGGATGCTAATCGT
ATGGAACCA	Kr-Of-Sr-Er_synthetic	AGCTAGCGGCCCCACCCCGTAGCTACGGGATGCTAATCGTAGCTACGAAACAATGAGCGTAGCTACGTGACCTTGAACGT
ATGGAAGCG	Kf-Sf_synthetic	AGCTACGGGGTGGGGCCGCTAGCTACGCTCATTGTTTCGT
ATGGAAGGT	Sf-Or-Kf_synthetic	AGCTACGCTCATTGTTTCGTAGCTACGATTAGCATCCCGTAGCTACGGGGTGGGGCCGCT
ATGGAATGA	Of-Sf-Er-Kr_synthetic	AGCTACGGGATGCTAATCGTAGCTACGCTCATTGTTTCGTAGCTACGTGACCTTGAACGTAGCTAGCGGCCCCACCCCGT
ATGGACAGG	Of-Sr-Er_synthetic	AGCTACGGGATGCTAATCGTAGCTACGAAACAATGAGCGTAGCTACGTGACCTTGAACGT
ATGGACCTC	Kf-Sr-Of-Ef_synthetic	AGCTACGGGGTGGGGCCGCTAGCTACGAAACAATGAGCGTAGCTACGGGATGCTAATCGTAGCTACGTTCAAGGTCACGT
ATGGAGAGC	Kr-Sf-Er_synthetic	AGCTAGCGGCCCCACCCCGTAGCTACGCTCATTGTTTCGTAGCTACGTGACCTTGAACGT
ATGGAGTTG	Sr-Kr-Er-Of_synthetic	AGCTACGAAACAATGAGCGTAGCTAGCGGCCCCACCCCGTAGCTACGTGACCTTGAACGTAGCTACGGGATGCTAATCGT
ATGGATCTA	Kr-Ef-Sr-Or_synthetic	AGCTAGCGGCCCCACCCCGTAGCTACGTTCAAGGTCACGTAGCTACGAAACAATGAGCGTAGCTACGATTAGCATCCCGT
ATGGATGTT	OfOrOfOr_CMF-Scalar	AGCTACGGGATGCTAATCGTAGCTACGATTAGCATCCCGTAGCTACGGGATGCTAATCGTAGCTACGATTAGCATCCCGT
ATGGCCTGT	Kr-Ef-Sf-Or_synthetic	AGCTAGCGGCCCCACCCCGTAGCTACGTTCAAGGTCACGTAGCTACGCTCATTGTTTCGTAGCTACGATTAGCATCCCGT
ATGGCGCCT	Sr-Or-Er_synthetic	AGCTACGAAACAATGAGCGTAGCTACGATTAGCATCCCGTAGCTACGTGACCTTGAACGT
ATGGCGTAC	Er-Of-Kf-Sr_synthetic	AGCTACGTGACCTTGAACGTAGCTACGGGATGCTAATCGTAGCTACGGGGTGGGGCCGCTAGCTACGAAACAATGAGCGT
ATGGCTCGG	Of-Kr-Sr-Er_synthetic	AGCTACGGGATGCTAATCGTAGCTAGCGGCCCCACCCCGTAGCTACGAAACAATGAGCGTAGCTACGTGACCTTGAACGT
ATGGCTTTC	Kf-Er-Sf_synthetic	AGCTACGGGGTGGGGCCGCTAGCTACGTGACCTTGAACGTAGCTACGCTCATTGTTTCGT
ATGGGAACT	Or-Kr-Sf-Er_synthetic	AGCTACGATTAGCATCCCGTAGCTAGCGGCCCCACCCCGTAGCTACGCTCATTGTTTCGTAGCTACGTGACCTTGAACGT
ATGGGAATA	KfOrSr_CMF-Scalar	AGCTACGGGGCGGGGCCGCTAGCTACGATTAGCATCCCGTAGCTACGAAACAATGAGCGT
ATGGGATAG	Kf-Ef-Or-Sr_synthetic	AGCTACGGGGTGGGGCCGCTAGCTACGTTCAAGGTCACGTAGCTACGATTAGCATCCCGTAGCTACGAAACAATGAGCGT
ATGGGATTC	KfOrSr_CMF-Scalar	AGCTACGGGGCGGGGCCGCTAGCTACGATTAGCATCCCGTAGCTACGAAACAATGAGCGT
ATGGGCGAG	Kr-Er-Sf-Or_synthetic	AGCTAGCGGCCCCACCCCGTAGCTACGTGACCTTGAACGTAGCTACGCTCATTGTTTCGTAGCTACGATTAGCATCCCGT
ATGGGCGTT	Kf-Or_synthetic	AGCTACGGGGTGGGGCCGCTAGCTACGATTAGCATCCCGT
ATGGGTGCA	Kr-Sf-Of-Er_synthetic	AGCTAGCGGCCCCACCCCGTAGCTACGCTCATTGTTTCGTAGCTACGGGATGCTAATCGTAGCTACGTGACCTTGAACGT
ATGGGTGTC	Sr-Of-Ef-Kr_synthetic	AGCTACGAAACAATGAGCGTAGCTACGGGATGCTAATCGTAGCTACGTTCAAGGTCACGTAGCTAGCGGCCCCACCCCGT
ATGGGTTAT	Ef-Kr-Or-Sr_synthetic	AGCTACGTTCAAGGTCACGTAGCTAGCGGCCCCACCCCGTAGCTACGATTAGCATCCCGTAGCTACGAAACAATGAGCGT
ATGGGTTTA	Sf-Er-Kf-Of_synthetic	AGCTACGCTCATTGTTTCGTAGCTACGTGACCTTGAACGTAGCTACGGGGTGGGGCCGCTAGCTACGGGATGCTAATCGT
ATGGTACAG	Er-Kf-Of-Sr_synthetic	AGCTACGTGACCTTGAACGTAGCTACGGGGTGGGGCCGCTAGCTACGGGATGCTAATCGTAGCTACGAAACAATGAGCGT
ATGGTATGG	Sr-Kf-Or-Er_synthetic	AGCTACGAAACAATGAGCGTAGCTACGGGGTGGGGCCGCTAGCTACGATTAGCATCCCGTAGCTACGTGACCTTGAACGT
ATGGTCGGC	Er-Of-Sf_synthetic	AGCTACGTGACCTTGAACGTAGCTACGGGATGCTAATCGTAGCTACGCTCATTGTTTCGT
ATGGTGTAG	Ef-Of-Kf-Sf_synthetic	AGCTACGTTCAAGGTCACGTAGCTACGGGATGCTAATCGTAGCTACGGGGTGGGGCCGCTAGCTACGCTCATTGTTTCGT
ATGGTGTTA	Er-Kr-Or-Sr_synthetic	AGCTACGTGACCTTGAACGTAGCTAGCGGCCCCACCCCGTAGCTACGATTAGCATCCCGTAGCTACGAAACAATGAGCGT
ATGGTTCGC	Of-Sr_synthetic	AGCTACGGGATGCTAATCGTAGCTACGAAACAATGAGCGT
ATGGTTGGA	Kf-Er-Sf-Or_synthetic	AGCTACGGGGTGGGGCCGCTAGCTACGTGACCTTGAACGTAGCTACGCTCATTGTTTCGTAGCTACGATTAGCATCCCGT
ATGTACGCT	Ef-Kr-Sf-Of_synthetic	AGCTACGTTCAAGGTCACGTAGCTAGCGGCCCCACCCCGTAGCTACGCTCATTGTTTCGTAGCTACGGGATGCTAATCGT
ATGTACTCA	Of-Kf-Sf-Ef_synthetic	AGCTACGGGATGCTAATCGTAGCTACGGGGTGGGGCCGCTAGCTACGCTCATTGTTTCGTAGCTACGTTCAAGGTCACGT
ATGTAGCCT	Ef-Or-Kr-Sr_synthetic	AGCTACGTTCAAGGTCACGTAGCTACGATTAGCATCCCGTAGCTAGCGGCCCCACCCCGTAGCTACGAAACAATGAGCGT
ATGTATGCG	Er-Sr-Kf-Of_synthetic	AGCTACGTGACCTTGAACGTAGCTACGAAACAATGAGCGTAGCTACGGGGTGGGGCCGCTAGCTACGGGATGCTAATCGT
ATGTCAGTA	Basal
ATGTCCCGC	Sf-Kf-Of-Ef_synthetic	AGCTACGCTCATTGTTTCGTAGCTACGGGGTGGGGCCGCTAGCTACGGGATGCTAATCGTAGCTACGTTCAAGGTCACGT
ATGTCCGAC	Sf-Kr-Or-Er_synthetic	AGCTACGCTCATTGTTTCGTAGCTAGCGGCCCCACCCCGTAGCTACGATTAGCATCCCGTAGCTACGTGACCTTGAACGT
ATGTCGGCA	Or-Kf-Sf-Ef_synthetic	AGCTACGATTAGCATCCCGTAGCTACGGGGTGGGGCCGCTAGCTACGCTCATTGTTTCGTAGCTACGTTCAAGGTCACGT
ATGTCGGTC	Sf-Or-Kf-Er_synthetic	AGCTACGCTCATTGTTTCGTAGCTACGATTAGCATCCCGTAGCTACGGGGTGGGGCCGCTAGCTACGTGACCTTGAACGT
ATGTCGTAT	Er-Kr_synthetic	AGCTACGTGACCTTGAACGTAGCTAGCGGCCCCACCCCGT
ATGTCGTTA	Er-Or-Sr-Kr_synthetic	AGCTACGTGACCTTGAACGTAGCTACGATTAGCATCCCGTAGCTACGAAACAATGAGCGTAGCTAGCGGCCCCACCCCGT
ATGTCTGCT	Of-Sr-Kf-Ef_synthetic	AGCTACGGGATGCTAATCGTAGCTACGAAACAATGAGCGTAGCTACGGGGTGGGGCCGCTAGCTACGTTCAAGGTCACGT
ATGTGATGC	Sf-Or-Er-Kf_synthetic	AGCTACGCTCATTGTTTCGTAGCTACGATTAGCATCCCGTAGCTACGTGACCTTGAACGTAGCTACGGGGTGGGGCCGCT
ATGTGCACA	Er-Kr-Of-Sf_synthetic	AGCTACGTGACCTTGAACGTAGCTAGCGGCCCCACCCCGTAGCTACGGGATGCTAATCGTAGCTACGCTCATTGTTTCGT
ATGTGCCAA	Ef-Sr-Kf_synthetic	AGCTACGTTCAAGGTCACGTAGCTACGAAACAATGAGCGTAGCTACGGGGTGGGGCCGCT
ATGTGCCTG	Or-Kr-Ef-Sf_synthetic	AGCTACGATTAGCATCCCGTAGCTAGCGGCCCCACCCCGTAGCTACGTTCAAGGTCACGTAGCTACGCTCATTGTTTCGT
ATGTGGTTG	Kf-Of-Er_synthetic	AGCTACGGGGTGGGGCCGCTAGCTACGGGATGCTAATCGTAGCTACGTGACCTTGAACGT
ATGTGTGCC	Kf-Sf-Ef_synthetic	AGCTACGGGGTGGGGCCGCTAGCTACGCTCATTGTTTCGTAGCTACGTTCAAGGTCACGT
ATGTGTTAG	Er-Sr_synthetic	AGCTACGTGACCTTGAACGTAGCTACGAAACAATGAGCGT
ATGTTACCA	Er-Of-Sr_synthetic	AGCTACGTGACCTTGAACGTAGCTACGGGATGCTAATCGTAGCTACGAAACAATGAGCGT
ATGTTACGC	Of-Ef-Kf_synthetic	AGCTACGGGATGCTAATCGTAGCTACGTTCAAGGTCACGTAGCTACGGGGTGGGGCCGCT
ATGTTCTGA	Sr-Or-Ef-Kr_synthetic	AGCTACGAAACAATGAGCGTAGCTACGATTAGCATCCCGTAGCTACGTTCAAGGTCACGTAGCTAGCGGCCCCACCCCGT
ATGTTGGAA	Basal
ATGTTGGGC	Of-Ef-Kr_synthetic	AGCTACGGGATGCTAATCGTAGCTACGTTCAAGGTCACGTAGCTAGCGGCCCCACCCCGT
ATGTTTCCC	Er-Or-Kr-Sr_synthetic	AGCTACGTGACCTTGAACGTAGCTACGATTAGCATCCCGTAGCTAGCGGCCCCACCCCGTAGCTACGAAACAATGAGCGT
ATTAACACG	Er-Sr_synthetic	AGCTACGTGACCTTGAACGTAGCTACGAAACAATGAGCGT
ATTAACCAC	Er-Kr-Sr-Of_synthetic	AGCTACGTGACCTTGAACGTAGCTAGCGGCCCCACCCCGTAGCTACGAAACAATGAGCGTAGCTACGGGATGCTAATCGT
ATTAACTCC	Sr-Or-Kf_synthetic	AGCTACGAAACAATGAGCGTAGCTACGATTAGCATCCCGTAGCTACGGGGTGGGGCCGCT
ATTAAGGTG	Sr-Kr-Of-Er_synthetic	AGCTACGAAACAATGAGCGTAGCTAGCGGCCCCACCCCGTAGCTACGGGATGCTAATCGTAGCTACGTGACCTTGAACGT
ATTACAGGA	Ef-Of-Kf-Sr_synthetic	AGCTACGTTCAAGGTCACGTAGCTACGGGATGCTAATCGTAGCTACGGGGTGGGGCCGCTAGCTACGAAACAATGAGCGT
ATTAGACGA	Or-Ef-Sf-Kr_synthetic	AGCTACGATTAGCATCCCGTAGCTACGTTCAAGGTCACGTAGCTACGCTCATTGTTTCGTAGCTAGCGGCCCCACCCCGT
ATTAGAGGT	Sr-Ef_synthetic	AGCTACGAAACAATGAGCGTAGCTACGTTCAAGGTCACGT
ATTAGCGGG	Kf-Sr-Or-Ef_synthetic	AGCTACGGGGTGGGGCCGCTAGCTACGAAACAATGAGCGTAGCTACGATTAGCATCCCGTAGCTACGTTCAAGGTCACGT
ATTAGCTCA	Kr-Of-Sf-Er_synthetic	AGCTAGCGGCCCCACCCCGTAGCTACGGGATGCTAATCGTAGCTACGCTCATTGTTTCGTAGCTACGTGACCTTGAACGT
ATTAGGGAT	Kf-Sr-Ef-Of_synthetic	AGCTACGGGGTGGGGCCGCTAGCTACGAAACAATGAGCGTAGCTACGTTCAAGGTCACGTAGCTACGGGATGCTAATCGT
ATTAGGGTC	Or-Ef-Kr_synthetic	AGCTACGATTAGCATCCCGTAGCTACGTTCAAGGTCACGTAGCTAGCGGCCCCACCCCGT
ATTAGTGCG	Ef-Kf-Sr_synthetic	AGCTACGTTCAAGGTCACGTAGCTACGGGGTGGGGCCGCTAGCTACGAAACAATGAGCGT
ATTATGCCA	Er-Sf-Kf_synthetic	AGCTACGTGACCTTGAACGTAGCTACGCTCATTGTTTCGTAGCTACGGGGTGGGGCCGCT
ATTCAACCT	Ef-Sf-Kr-Or_synthetic	AGCTACGTTCAAGGTCACGTAGCTACGCTCATTGTTTCGTAGCTAGCGGCCCCACCCCGTAGCTACGATTAGCATCCCGT
ATTCAAGGC	Sf-Or-Kf-Er_synthetic	AGCTACGCTCATTGTTTCGTAGCTACGATTAGCATCCCGTAGCTACGGGGTGGGGCCGCTAGCTACGTGACCTTGAACGT
ATTCACAGA	Of-Kr-Sr-Er_synthetic	AGCTACGGGATGCTAATCGTAGCTAGCGGCCCCACCCCGTAGCTACGAAACAATGAGCGTAGCTACGTGACCTTGAACGT
ATTCACCAT	Sr-Of-Kf-Er_synthetic	AGCTACGAAACAATGAGCGTAGCTACGGGATGCTAATCGTAGCTACGGGGTGGGGCCGCTAGCTACGTGACCTTGAACGT
ATTCACGCT	Or-Sr-Er-Kr_synthetic	AGCTACGATTAGCATCCCGTAGCTACGAAACAATGAGCGTAGCTACGTGACCTTGAACGTAGCTAGCGGCCCCACCCCGT
ATTCAGAGT	Ef-Of-Kr-Sf_synthetic	AGCTACGTTCAAGGTCACGTAGCTACGGGATGCTAATCGTAGCTAGCGGCCCCACCCCGTAGCTACGCTCATTGTTTCGT
ATTCAGCAG	Kr-Of-Sf-Ef_synthetic	AGCTAGCGGCCCCACCCCGTAGCTACGGGATGCTAATCGTAGCTACGCTCATTGTTTCGTAGCTACGTTCAAGGTCACGT
ATTCAGGTC	Kr-Sf-Of_synthetic	AGCTAGCGGCCCCACCCCGTAGCTACGCTCATTGTTTCGTAGCTACGGGATGCTAATCGT
ATTCCAGTT	Basal
ATTCCCTGC	Sr-Kr-Of_synthetic	AGCTACGAAACAATGAGCGTAGCTAGCGGCCCCACCCCGTAGCTACGGGATGCTAATCGT
ATTCCTCAG	Kr-Sf_synthetic	AGCTAGCGGCCCCACCCCGTAGCTACGCTCATTGTTTCGT
ATTCCTCTA	Er-Or-Kr-Sf_synthetic	AGCTACGTGACCTTGAACGTAGCTACGATTAGCATCCCGTAGCTAGCGGCCCCACCCCGTAGCTACGCTCATTGTTTCGT
ATTCGAGAC	Sf-Kr-Of-Ef_synthetic	AGCTACGCTCATTGTTTCGTAGCTAGCGGCCCCACCCCGTAGCTACGGGATGCTAATCGTAGCTACGTTCAAGGTCACGT
ATTCGAGTG	Of-Sf-Er_synthetic	AGCTACGGGATGCTAATCGTAGCTACGCTCATTGTTTCGTAGCTACGTGACCTTGAACGT
ATTCGCTGT	Kf-Or-Sr-Er_synthetic	AGCTACGGGGTGGGGCCGCTAGCTACGATTAGCATCCCGTAGCTACGAAACAATGAGCGTAGCTACGTGACCTTGAACGT
ATTCGTCAT	Kf-Sr-Of-Ef_synthetic	AGCTACGGGGTGGGGCCGCTAGCTACGAAACAATGAGCGTAGCTACGGGATGCTAATCGTAGCTACGTTCAAGGTCACGT
ATTCGTCTG	Er-Of-Kf_synthetic	AGCTACGTGACCTTGAACGTAGCTACGGGATGCTAATCGTAGCTACGGGGTGGGGCCGCT
ATTCTAGGA	Er-Kf-Or-Sf_synthetic	AGCTACGTGACCTTGAACGTAGCTACGGGGTGGGGCCGCTAGCTACGATTAGCATCCCGTAGCTACGCTCATTGTTTCGT
ATTCTATCG	Kf-Of-Er-Sf_synthetic	AGCTACGGGGTGGGGCCGCTAGCTACGGGATGCTAATCGTAGCTACGTGACCTTGAACGTAGCTACGCTCATTGTTTCGT
ATTCTGCCT	Of-Er-Sr-Kr_synthetic	AGCTACGGGATGCTAATCGTAGCTACGTGACCTTGAACGTAGCTACGAAACAATGAGCGTAGCTAGCGGCCCCACCCCGT
ATTCTGGCA	Ef-Sf-Kf-Of_synthetic	AGCTACGTTCAAGGTCACGTAGCTACGCTCATTGTTTCGTAGCTACGGGGTGGGGCCGCTAGCTACGGGATGCTAATCGT
ATTCTGTGA	Er-Kf-Sr-Of_synthetic	AGCTACGTGACCTTGAACGTAGCTACGGGGTGGGGCCGCTAGCTACGAAACAATGAGCGTAGCTACGGGATGCTAATCGT
ATTCTTCCG	Sf-Of-Kf-Er_synthetic	AGCTACGCTCATTGTTTCGTAGCTACGGGATGCTAATCGTAGCTACGGGGTGGGGCCGCTAGCTACGTGACCTTGAACGT
ATTGACCTT	Ef-Kr-Sf_synthetic	AGCTACGTTCAAGGTCACGTAGCTAGCGGCCCCACCCCGTAGCTACGCTCATTGTTTCGT
ATTGCAACG	Sr-Er-Kf-Of_synthetic	AGCTACGAAACAATGAGCGTAGCTACGTGACCTTGAACGTAGCTACGGGGTGGGGCCGCTAGCTACGGGATGCTAATCGT
ATTGCATCA	Ef-Or-Kf-Sr_synthetic	AGCTACGTTCAAGGTCACGTAGCTACGATTAGCATCCCGTAGCTACGGGGTGGGGCCGCTAGCTACGAAACAATGAGCGT
ATTGCCCGA	Of-Sr-Ef_synthetic	AGCTACGGGATGCTAATCGTAGCTACGAAACAATGAGCGTAGCTACGTTCAAGGTCACGT
ATTGCCTGG	Kf-Sr-Er-Of_synthetic	AGCTACGGGGTGGGGCCGCTAGCTACGAAACAATGAGCGTAGCTACGTGACCTTGAACGTAGCTACGGGATGCTAATCGT
ATTGCGGAA	Basal
ATTGCGGTG	Of-Er-Kf-Sr_synthetic	AGCTACGGGATGCTAATCGTAGCTACGTGACCTTGAACGTAGCTACGGGGTGGGGCCGCTAGCTACGAAACAATGAGCGT
ATTGCTGGA	Of-Er-Sf-Kf_synthetic	AGCTACGGGATGCTAATCGTAGCTACGTGACCTTGAACGTAGCTACGCTCATTGTTTCGTAGCTACGGGGTGGGGCCGCT
ATTGGCCAG	Kf-Of-Sf-Ef_synthetic	AGCTACGGGGTGGGGCCGCTAGCTACGGGATGCTAATCGTAGCTACGCTCATTGTTTCGTAGCTACGTTCAAGGTCACGT
ATTGGGCGG	Er-Kf-Sf_synthetic	AGCTACGTGACCTTGAACGTAGCTACGGGGTGGGGCCGCTAGCTACGCTCATTGTTTCGT
ATTGGTCCT	Of-Kf-Ef-Sf_synthetic	AGCTACGGGATGCTAATCGTAGCTACGGGGTGGGGCCGCTAGCTACGTTCAAGGTCACGTAGCTACGCTCATTGTTTCGT
ATTGTCCCA	Sr-Kf-Or_synthetic	AGCTACGAAACAATGAGCGTAGCTACGGGGTGGGGCCGCTAGCTACGATTAGCATCCCGT
ATTGTCCGT	Kr-Ef-Sf_synthetic	AGCTAGCGGCCCCACCCCGTAGCTACGTTCAAGGTCACGTAGCTACGCTCATTGTTTCGT
ATTGTGACG	Er-Kr-Of-Sr_synthetic	AGCTACGTGACCTTGAACGTAGCTAGCGGCCCCACCCCGTAGCTACGGGATGCTAATCGTAGCTACGAAACAATGAGCGT
ATTGTGGTC	Or-Er_synthetic	AGCTACGATTAGCATCCCGTAGCTACGTGACCTTGAACGT
ATTTACGTG	Sf-Of-Kr-Ef_synthetic	AGCTACGCTCATTGTTTCGTAGCTACGGGATGCTAATCGTAGCTAGCGGCCCCACCCCGTAGCTACGTTCAAGGTCACGT
ATTTAGAGG	Er-Sf-Of-Kf_synthetic	AGCTACGTGACCTTGAACGTAGCTACGCTCATTGTTTCGTAGCTACGGGATGCTAATCGTAGCTACGGGGTGGGGCCGCT
ATTTAGCCC	Sr-Or-Kr_synthetic	AGCTACGAAACAATGAGCGTAGCTACGATTAGCATCCCGTAGCTAGCGGCCCCACCCCGT
ATTTAGCGT	Kf-Sf-Or-Er_synthetic	AGCTACGGGGTGGGGCCGCTAGCTACGCTCATTGTTTCGTAGCTACGATTAGCATCCCGTAGCTACGTGACCTTGAACGT
ATTTCTAGC	Kr-Or-Ef-Sr_synthetic	AGCTAGCGGCCCCACCCCGTAGCTACGATTAGCATCCCGTAGCTACGTTCAAGGTCACGTAGCTACGAAACAATGAGCGT
ATTTCTTCC	Sr-Kr-Er_synthetic	AGCTACGAAACAATGAGCGTAGCTAGCGGCCCCACCCCGTAGCTACGTGACCTTGAACGT
ATTTGCGTA	Kf-Er-Or-Sf_synthetic	AGCTACGGGGTGGGGCCGCTAGCTACGTGACCTTGAACGTAGCTACGATTAGCATCCCGTAGCTACGCTCATTGTTTCGT
ATTTGGAGC	Ef-Sr-Kr-Or_synthetic	AGCTACGTTCAAGGTCACGTAGCTACGAAACAATGAGCGTAGCTAGCGGCCCCACCCCGTAGCTACGATTAGCATCCCGT
ATTTGGTGT	Kf-Or-Ef_synthetic	AGCTACGGGGTGGGGCCGCTAGCTACGATTAGCATCCCGTAGCTACGTTCAAGGTCACGT
ATTTGTGCA	Of-Ef_synthetic	AGCTACGGGATGCTAATCGTAGCTACGTTCAAGGTCACGT
CAAACACGC	Of-Ef-Kf-Sr_synthetic	AGCTACGGGATGCTAATCGTAGCTACGTTCAAGGTCACGTAGCTACGGGGTGGGGCCGCTAGCTACGAAACAATGAGCGT
CAAACAGCG	Kf-Sf-Er_synthetic	AGCTACGGGGTGGGGCCGCTAGCTACGCTCATTGTTTCGTAGCTACGTGACCTTGAACGT
CAAACCATA	Ef-Kf-Or-Sr_synthetic	AGCTACGTTCAAGGTCACGTAGCTACGGGGTGGGGCCGCTAGCTACGATTAGCATCCCGTAGCTACGAAACAATGAGCGT
CAAACGAGG	Of-Kr-Sr_synthetic	AGCTACGGGATGCTAATCGTAGCTAGCGGCCCCACCCCGTAGCTACGAAACAATGAGCGT
CAAACGGGC	Ef-Kr-Or-Sr_synthetic	AGCTACGTTCAAGGTCACGTAGCTAGCGGCCCCACCCCGTAGCTACGATTAGCATCCCGTAGCTACGAAACAATGAGCGT
CAAACTAAC	Kf-Er-Of-Sf_synthetic	AGCTACGGGGTGGGGCCGCTAGCTACGTGACCTTGAACGTAGCTACGGGATGCTAATCGTAGCTACGCTCATTGTTTCGT
CAAAGACAA	Of-Ef-Kr_synthetic	AGCTACGGGATGCTAATCGTAGCTACGTTCAAGGTCACGTAGCTAGCGGCCCCACCCCGT
CAAAGCGCC	Kf-Of-Sr-Ef_synthetic	AGCTACGGGGTGGGGCCGCTAGCTACGGGATGCTAATCGTAGCTACGAAACAATGAGCGTAGCTACGTTCAAGGTCACGT
CAAAGGTCA	Or-Kf_synthetic	AGCTACGATTAGCATCCCGTAGCTACGGGGTGGGGCCGCT
CAAAGTGTC	Sf-Or-Kr-Ef_synthetic	AGCTACGCTCATTGTTTCGTAGCTACGATTAGCATCCCGTAGCTAGCGGCCCCACCCCGTAGCTACGTTCAAGGTCACGT
CAAAGTTCT	KfSfKfEr_CMF-Scalar	AGCTACGGGGCGGGGCCGCTAGCTACGCTCATTGTTTCGTAGCTACGGGGCGGGGCCGCTAGCTACGTGACCTTGAACGT
CAAATCAGG	Sr-Ef-Or-Kf_synthetic	AGCTACGAAACAATGAGCGTAGCTACGTTCAAGGTCACGTAGCTACGATTAGCATCCCGTAGCTACGGGGTGGGGCCGCT
CAAATCCCT	Basal
CAACAAGAT	Of-Sf-Ef-Kf_synthetic	AGCTACGGGATGCTAATCGTAGCTACGCTCATTGTTTCGTAGCTACGTTCAAGGTCACGTAGCTACGGGGTGGGGCCGCT
CAACAAGTA	Ef-Sr-Or-Kr_synthetic	AGCTACGTTCAAGGTCACGTAGCTACGAAACAATGAGCGTAGCTACGATTAGCATCCCGTAGCTAGCGGCCCCACCCCGT
CAACACCCT	Of-Kr_synthetic	AGCTACGGGATGCTAATCGTAGCTAGCGGCCCCACCCCGT
CAACACTAA	Ef-Kr-Sr_synthetic	AGCTACGTTCAAGGTCACGTAGCTAGCGGCCCCACCCCGTAGCTACGAAACAATGAGCGT
CAACAGAGC	Er-Of-Kr_synthetic	AGCTACGTGACCTTGAACGTAGCTACGGGATGCTAATCGTAGCTAGCGGCCCCACCCCGT
CAACAGCAG	Sr-Kr-Er_synthetic	AGCTACGAAACAATGAGCGTAGCTAGCGGCCCCACCCCGTAGCTACGTGACCTTGAACGT
CAACCACAG	Er-Sr-Or-Kr_synthetic	AGCTACGTGACCTTGAACGTAGCTACGAAACAATGAGCGTAGCTACGATTAGCATCCCGTAGCTAGCGGCCCCACCCCGT
CAACCCAAG	Kr-Sr-Er-Or_synthetic	AGCTAGCGGCCCCACCCCGTAGCTACGAAACAATGAGCGTAGCTACGTGACCTTGAACGTAGCTACGATTAGCATCCCGT
CAACGATGG	Of-Kf-Ef-Sf_synthetic	AGCTACGGGATGCTAATCGTAGCTACGGGGTGGGGCCGCTAGCTACGTTCAAGGTCACGTAGCTACGCTCATTGTTTCGT
CAACGCAGG	Or-Kf-Sr-Er_synthetic	AGCTACGATTAGCATCCCGTAGCTACGGGGTGGGGCCGCTAGCTACGAAACAATGAGCGTAGCTACGTGACCTTGAACGT
CAACTACCT	Er-Kr-Or_synthetic	AGCTACGTGACCTTGAACGTAGCTAGCGGCCCCACCCCGTAGCTACGATTAGCATCCCGT
CAACTCGGA	Kr-Sr-Ef-Of_synthetic	AGCTAGCGGCCCCACCCCGTAGCTACGAAACAATGAGCGTAGCTACGTTCAAGGTCACGTAGCTACGGGATGCTAATCGT
CAACTCTAC	Of-Ef-Sr-Kr_synthetic	AGCTACGGGATGCTAATCGTAGCTACGTTCAAGGTCACGTAGCTACGAAACAATGAGCGTAGCTAGCGGCCCCACCCCGT
CAACTGACA	Kf-Of-Sr_synthetic	AGCTACGGGGTGGGGCCGCTAGCTACGGGATGCTAATCGTAGCTACGAAACAATGAGCGT
CAACTGCAT	Kr-Or-Ef-Sf_synthetic	AGCTAGCGGCCCCACCCCGTAGCTACGATTAGCATCCCGTAGCTACGTTCAAGGTCACGTAGCTACGCTCATTGTTTCGT
CAACTGTCC	Or-Er-Kr-Sf_synthetic	AGCTACGATTAGCATCCCGTAGCTACGTGACCTTGAACGTAGCTAGCGGCCCCACCCCGTAGCTACGCTCATTGTTTCGT
CAACTTAGT	Sr-Of-Er-Kf_synthetic	AGCTACGAAACAATGAGCGTAGCTACGGGATGCTAATCGTAGCTACGTGACCTTGAACGTAGCTACGGGGTGGGGCCGCT
CAAGAAGCG	Sf-Ef-Of-Kf_synthetic	AGCTACGCTCATTGTTTCGTAGCTACGTTCAAGGTCACGTAGCTACGGGATGCTAATCGTAGCTACGGGGTGGGGCCGCT
CAAGAGTCT	Basal
CAAGATACT	Or-Er-Sf-Kr_synthetic	AGCTACGATTAGCATCCCGTAGCTACGTGACCTTGAACGTAGCTACGCTCATTGTTTCGTAGCTAGCGGCCCCACCCCGT
CAAGATAGG	Er-Of-Sf_synthetic	AGCTACGTGACCTTGAACGTAGCTACGGGATGCTAATCGTAGCTACGCTCATTGTTTCGT
CAAGCAAAC	Sf-Er-Or-Kr_synthetic	AGCTACGCTCATTGTTTCGTAGCTACGTGACCTTGAACGTAGCTACGATTAGCATCCCGTAGCTAGCGGCCCCACCCCGT
CAAGCACTC	Of-Kr-Sr_synthetic	AGCTACGGGATGCTAATCGTAGCTAGCGGCCCCACCCCGTAGCTACGAAACAATGAGCGT
CAAGCAGAT	Ef-Sr-Of_synthetic	AGCTACGTTCAAGGTCACGTAGCTACGAAACAATGAGCGTAGCTACGGGATGCTAATCGT
CAAGCAGTG	Sf-Er-Kr-Of_synthetic	AGCTACGCTCATTGTTTCGTAGCTACGTGACCTTGAACGTAGCTAGCGGCCCCACCCCGTAGCTACGGGATGCTAATCGT
CAAGCCCAC	Er-Or-Kf-Sr_synthetic	AGCTACGTGACCTTGAACGTAGCTACGATTAGCATCCCGTAGCTACGGGGTGGGGCCGCTAGCTACGAAACAATGAGCGT
CAAGCCTAG	Basal
CAAGCCTCC	Kf-Er-Of-Sf_synthetic	AGCTACGGGGTGGGGCCGCTAGCTACGTGACCTTGAACGTAGCTACGGGATGCTAATCGTAGCTACGCTCATTGTTTCGT
CAAGCCTTA	Er-Sf-Kr_synthetic	AGCTACGTGACCTTGAACGTAGCTACGCTCATTGTTTCGTAGCTAGCGGCCCCACCCCGT
CAAGCGCGA	Ef-Of-Sf-Kf_synthetic	AGCTACGTTCAAGGTCACGTAGCTACGGGATGCTAATCGTAGCTACGCTCATTGTTTCGTAGCTACGGGGTGGGGCCGCT
CAAGCGGAA	Ef-Kr_synthetic	AGCTACGTTCAAGGTCACGTAGCTAGCGGCCCCACCCCGT
CAAGCGTCG	Of-Ef-Sr-Kr_synthetic	AGCTACGGGATGCTAATCGTAGCTACGTTCAAGGTCACGTAGCTACGAAACAATGAGCGTAGCTAGCGGCCCCACCCCGT
CAAGCTAAG	Of-Sr-Ef-Kf_synthetic	AGCTACGGGATGCTAATCGTAGCTACGAAACAATGAGCGTAGCTACGTTCAAGGTCACGTAGCTACGGGGTGGGGCCGCT
CAAGCTAGT	Ef-Sf-Kf-Or_synthetic	AGCTACGTTCAAGGTCACGTAGCTACGCTCATTGTTTCGTAGCTACGGGGTGGGGCCGCTAGCTACGATTAGCATCCCGT
CAAGCTCCC	Of-Kf-Er-Sr_synthetic	AGCTACGGGATGCTAATCGTAGCTACGGGGTGGGGCCGCTAGCTACGTGACCTTGAACGTAGCTACGAAACAATGAGCGT
CAAGCTGGA	Sr-Or-Kf_synthetic	AGCTACGAAACAATGAGCGTAGCTACGATTAGCATCCCGTAGCTACGGGGTGGGGCCGCT
CAAGGAAGT	Er-Sr-Kr_synthetic	AGCTACGTGACCTTGAACGTAGCTACGAAACAATGAGCGTAGCTAGCGGCCCCACCCCGT
CAAGGATAG	Er-Or-Kf-Sf_synthetic	AGCTACGTGACCTTGAACGTAGCTACGATTAGCATCCCGTAGCTACGGGGTGGGGCCGCTAGCTACGCTCATTGTTTCGT
CAAGGGTTC	Basal
CAAGTACCC	Sr-Kr-Ef-Or_synthetic	AGCTACGAAACAATGAGCGTAGCTAGCGGCCCCACCCCGTAGCTACGTTCAAGGTCACGTAGCTACGATTAGCATCCCGT
CAAGTCATG	Er-Sf-Of_synthetic	AGCTACGTGACCTTGAACGTAGCTACGCTCATTGTTTCGTAGCTACGGGATGCTAATCGT
CAAGTCGGT	Kf-Er-Sf_synthetic	AGCTACGGGGTGGGGCCGCTAGCTACGTGACCTTGAACGTAGCTACGCTCATTGTTTCGT
CAAGTCTGA	Of-Sf-Er-Kr_synthetic	AGCTACGGGATGCTAATCGTAGCTACGCTCATTGTTTCGTAGCTACGTGACCTTGAACGTAGCTAGCGGCCCCACCCCGT
CAAGTGAGC	Or-Er-Sr-Kf_synthetic	AGCTACGATTAGCATCCCGTAGCTACGTGACCTTGAACGTAGCTACGAAACAATGAGCGTAGCTACGGGGTGGGGCCGCT
CAAGTGCAA	Or-Ef-Kf-Sf_synthetic	AGCTACGATTAGCATCCCGTAGCTACGTTCAAGGTCACGTAGCTACGGGGTGGGGCCGCTAGCTACGCTCATTGTTTCGT
CAAGTTACA	Er-Sf-Kr_synthetic	AGCTACGTGACCTTGAACGTAGCTACGCTCATTGTTTCGTAGCTAGCGGCCCCACCCCGT
CAAGTTCAG	Er-Kf-Sr_synthetic	AGCTACGTGACCTTGAACGTAGCTACGGGGTGGGGCCGCTAGCTACGAAACAATGAGCGT
CAATAAGAC	Of-Ef-Kf-Sr_synthetic	AGCTACGGGATGCTAATCGTAGCTACGTTCAAGGTCACGTAGCTACGGGGTGGGGCCGCTAGCTACGAAACAATGAGCGT
CAATACACG	Sr-Kf-Er-Or_synthetic	AGCTACGAAACAATGAGCGTAGCTACGGGGTGGGGCCGCTAGCTACGTGACCTTGAACGTAGCTACGATTAGCATCCCGT
CAATACGTT	KrSrSfSr_CMF-Scalar	AGCTAGCGGCCCCGCCCCGTAGCTACGAAACAATGAGCGTAGCTACGCTCATTGTTTCGTAGCTACGAAACAATGAGCGT
CAATAGCCG	Of-Er-Kf-Sf_synthetic	AGCTACGGGATGCTAATCGTAGCTACGTGACCTTGAACGTAGCTACGGGGTGGGGCCGCTAGCTACGCTCATTGTTTCGT
CAATAGGGT	Kf-Ef-Sf_synthetic	AGCTACGGGGTGGGGCCGCTAGCTACGTTCAAGGTCACGTAGCTACGCTCATTGTTTCGT
CAATATGCC	Sf-Er-Or-Kr_synthetic	AGCTACGCTCATTGTTTCGTAGCTACGTGACCTTGAACGTAGCTACGATTAGCATCCCGTAGCTAGCGGCCCCACCCCGT
CAATCAGTC	Sf-Kf-Ef-Of_synthetic	AGCTACGCTCATTGTTTCGTAGCTACGGGGTGGGGCCGCTAGCTACGTTCAAGGTCACGTAGCTACGGGATGCTAATCGT
CAATCCCGG	Sr-Kr-Or-Ef_synthetic	AGCTACGAAACAATGAGCGTAGCTAGCGGCCCCACCCCGTAGCTACGATTAGCATCCCGTAGCTACGTTCAAGGTCACGT
CAATCGATG	OfOrOfOr_CMF-Scalar	AGCTACGGGATGCTAATCGTAGCTACGATTAGCATCCCGTAGCTACGGGATGCTAATCGTAGCTACGATTAGCATCCCGT
CAATCTAGG	Kf-Sr-Of-Ef_synthetic	AGCTACGGGGTGGGGCCGCTAGCTACGAAACAATGAGCGTAGCTACGGGATGCTAATCGTAGCTACGTTCAAGGTCACGT
CAATGAGGC	Sr-Er-Kr_synthetic	AGCTACGAAACAATGAGCGTAGCTACGTGACCTTGAACGTAGCTAGCGGCCCCACCCCGT
CAATGATCT	Sr-Of-Kr-Er_synthetic	AGCTACGAAACAATGAGCGTAGCTACGGGATGCTAATCGTAGCTAGCGGCCCCACCCCGTAGCTACGTGACCTTGAACGT
CAATGCGTG	Er-Sf-Or-Kr_synthetic	AGCTACGTGACCTTGAACGTAGCTACGCTCATTGTTTCGTAGCTACGATTAGCATCCCGTAGCTAGCGGCCCCACCCCGT
CAATGCTCC	Or-Kf-Sf_synthetic	AGCTACGATTAGCATCCCGTAGCTACGGGGTGGGGCCGCTAGCTACGCTCATTGTTTCGT
CAATGGAGC	Kr-Er-Sr-Of_synthetic	AGCTAGCGGCCCCACCCCGTAGCTACGTGACCTTGAACGTAGCTACGAAACAATGAGCGTAGCTACGGGATGCTAATCGT
CAATGGTGT	Kf-Ef-Sf_synthetic	AGCTACGGGGTGGGGCCGCTAGCTACGTTCAAGGTCACGTAGCTACGCTCATTGTTTCGT
CAATGTCGA	Sf-Ef-Kr-Or_synthetic	AGCTACGCTCATTGTTTCGTAGCTACGTTCAAGGTCACGTAGCTAGCGGCCCCACCCCGTAGCTACGATTAGCATCCCGT
CAATTATGC	Of-Er-Kr_synthetic	AGCTACGGGATGCTAATCGTAGCTACGTGACCTTGAACGTAGCTAGCGGCCCCACCCCGT
CAATTCCGT	Basal
CAATTCGTA	Er-Kf-Sf_synthetic	AGCTACGTGACCTTGAACGTAGCTACGGGGTGGGGCCGCTAGCTACGCTCATTGTTTCGT
CAATTGGAA	Kf-Of-Ef-Sr_synthetic	AGCTACGGGGTGGGGCCGCTAGCTACGGGATGCTAATCGTAGCTACGTTCAAGGTCACGTAGCTACGAAACAATGAGCGT
CAATTGGTT	Sf-Kr-Of-Er_synthetic	AGCTACGCTCATTGTTTCGTAGCTAGCGGCCCCACCCCGTAGCTACGGGATGCTAATCGTAGCTACGTGACCTTGAACGT
CAATTGTCT	Of-Sr-Er-Kr_synthetic	AGCTACGGGATGCTAATCGTAGCTACGAAACAATGAGCGTAGCTACGTGACCTTGAACGTAGCTAGCGGCCCCACCCCGT
CAATTTGAG	Kr-Sf-Er-Of_synthetic	AGCTAGCGGCCCCACCCCGTAGCTACGCTCATTGTTTCGTAGCTACGTGACCTTGAACGTAGCTACGGGATGCTAATCGT
CACAACGGG	Of-Sf_synthetic	AGCTACGGGATGCTAATCGTAGCTACGCTCATTGTTTCGT
CACAACTCG	Er-Sr-Kf-Or_synthetic	AGCTACGTGACCTTGAACGTAGCTACGAAACAATGAGCGTAGCTACGGGGTGGGGCCGCTAGCTACGATTAGCATCCCGT
CACAAGCTG	Er-Kr-Sr-Of_synthetic	AGCTACGTGACCTTGAACGTAGCTAGCGGCCCCACCCCGTAGCTACGAAACAATGAGCGTAGCTACGGGATGCTAATCGT
CACAAGGTA	Of-Kf-Ef-Sf_synthetic	AGCTACGGGATGCTAATCGTAGCTACGGGGTGGGGCCGCTAGCTACGTTCAAGGTCACGTAGCTACGCTCATTGTTTCGT
CACACACCG	Sf-Kf-Or-Ef_synthetic	AGCTACGCTCATTGTTTCGTAGCTACGGGGTGGGGCCGCTAGCTACGATTAGCATCCCGTAGCTACGTTCAAGGTCACGT
CACACATTC	Of-Er_synthetic	AGCTACGGGATGCTAATCGTAGCTACGTGACCTTGAACGT
CACACCGAG	Sr-Kf-Er_synthetic	AGCTACGAAACAATGAGCGTAGCTACGGGGTGGGGCCGCTAGCTACGTGACCTTGAACGT
CACACCGTA	Sf-Kf-Er-Or_synthetic	AGCTACGCTCATTGTTTCGTAGCTACGGGGTGGGGCCGCTAGCTACGTGACCTTGAACGTAGCTACGATTAGCATCCCGT
CACACCTAT	Sf-Kr-Of-Ef_synthetic	AGCTACGCTCATTGTTTCGTAGCTAGCGGCCCCACCCCGTAGCTACGGGATGCTAATCGTAGCTACGTTCAAGGTCACGT
CACACGCGT	Kr-Sf-Of-Ef_synthetic	AGCTAGCGGCCCCACCCCGTAGCTACGCTCATTGTTTCGTAGCTACGGGATGCTAATCGTAGCTACGTTCAAGGTCACGT
CACACGTGG	Sf-Ef-Or_synthetic	AGCTACGCTCATTGTTTCGTAGCTACGTTCAAGGTCACGTAGCTACGATTAGCATCCCGT
CACACTTTA	Er-Kr-Or-Sf_synthetic	AGCTACGTGACCTTGAACGTAGCTAGCGGCCCCACCCCGTAGCTACGATTAGCATCCCGTAGCTACGCTCATTGTTTCGT
CACAGAGGA	Or-Sf-Kr_synthetic	AGCTACGATTAGCATCCCGTAGCTACGCTCATTGTTTCGTAGCTAGCGGCCCCACCCCGT
CACAGATGG	Kr-Er-Or-Sf_synthetic	AGCTAGCGGCCCCACCCCGTAGCTACGTGACCTTGAACGTAGCTACGATTAGCATCCCGTAGCTACGCTCATTGTTTCGT
CACAGCAAG	Ef-Sr-Of-Kf_synthetic	AGCTACGTTCAAGGTCACGTAGCTACGAAACAATGAGCGTAGCTACGGGATGCTAATCGTAGCTACGGGGTGGGGCCGCT
CACAGCCAT	Sr-Or-Er_synthetic	AGCTACGAAACAATGAGCGTAGCTACGATTAGCATCCCGTAGCTACGTGACCTTGAACGT
CACAGCCTG	Ef-Or-Kf-Sf_synthetic	AGCTACGTTCAAGGTCACGTAGCTACGATTAGCATCCCGTAGCTACGGGGTGGGGCCGCTAGCTACGCTCATTGTTTCGT
CACAGCGGT	Sf-Kf-Ef_synthetic	AGCTACGCTCATTGTTTCGTAGCTACGGGGTGGGGCCGCTAGCTACGTTCAAGGTCACGT
CACAGGGAG	Kr-Er-Sr-Or_synthetic	AGCTAGCGGCCCCACCCCGTAGCTACGTGACCTTGAACGTAGCTACGAAACAATGAGCGTAGCTACGATTAGCATCCCGT
CACATAATC	Kf-Er-Sr-Of_synthetic	AGCTACGGGGTGGGGCCGCTAGCTACGTGACCTTGAACGTAGCTACGAAACAATGAGCGTAGCTACGGGATGCTAATCGT
CACATCACG	Ef-Kf-Or-Sf_synthetic	AGCTACGTTCAAGGTCACGTAGCTACGGGGTGGGGCCGCTAGCTACGATTAGCATCCCGTAGCTACGCTCATTGTTTCGT
CACATCCGC	Ef-Sf-Kf_synthetic	AGCTACGTTCAAGGTCACGTAGCTACGCTCATTGTTTCGTAGCTACGGGGTGGGGCCGCT
CACATGGCC	Ef-Sf-Kr_synthetic	AGCTACGTTCAAGGTCACGTAGCTACGCTCATTGTTTCGTAGCTAGCGGCCCCACCCCGT
CACCAAAGC	Sf-Kf-Ef-Of_synthetic	AGCTACGCTCATTGTTTCGTAGCTACGGGGTGGGGCCGCTAGCTACGTTCAAGGTCACGTAGCTACGGGATGCTAATCGT
CACCAATCA	Kf-Er-Or-Sf_synthetic	AGCTACGGGGTGGGGCCGCTAGCTACGTGACCTTGAACGTAGCTACGATTAGCATCCCGTAGCTACGCTCATTGTTTCGT
CACCAGACA	Kr-Er-Or-Sr_synthetic	AGCTAGCGGCCCCACCCCGTAGCTACGTGACCTTGAACGTAGCTACGATTAGCATCCCGTAGCTACGAAACAATGAGCGT
CACCAGCAC	Of-Ef-Kf-Sr_synthetic	AGCTACGGGATGCTAATCGTAGCTACGTTCAAGGTCACGTAGCTACGGGGTGGGGCCGCTAGCTACGAAACAATGAGCGT
CACCAGTCT	Of-Er-Kr-Sr_synthetic	AGCTACGGGATGCTAATCGTAGCTACGTGACCTTGAACGTAGCTAGCGGCCCCACCCCGTAGCTACGAAACAATGAGCGT
CACCATAGT	Of-Er-Sr-Kr_synthetic	AGCTACGGGATGCTAATCGTAGCTACGTGACCTTGAACGTAGCTACGAAACAATGAGCGTAGCTAGCGGCCCCACCCCGT
CACCCAACT	Of-Kr-Sr_synthetic	AGCTACGGGATGCTAATCGTAGCTAGCGGCCCCACCCCGTAGCTACGAAACAATGAGCGT
CACCCATAT	Sf-Kr-Or-Ef_synthetic	AGCTACGCTCATTGTTTCGTAGCTAGCGGCCCCACCCCGTAGCTACGATTAGCATCCCGTAGCTACGTTCAAGGTCACGT
CACCCTGAT	Or-Sf-Kf-Er_synthetic	AGCTACGATTAGCATCCCGTAGCTACGCTCATTGTTTCGTAGCTACGGGGTGGGGCCGCTAGCTACGTGACCTTGAACGT
CACCGACTA	Of-Ef-Kf-Sr_synthetic	AGCTACGGGATGCTAATCGTAGCTACGTTCAAGGTCACGTAGCTACGGGGTGGGGCCGCTAGCTACGAAACAATGAGCGT
CACCGAGTG	Kf-Sr-Er-Or_synthetic	AGCTACGGGGTGGGGCCGCTAGCTACGAAACAATGAGCGTAGCTACGTGACCTTGAACGTAGCTACGATTAGCATCCCGT
CACCGATCC	Sf-Kf-Ef_synthetic	AGCTACGCTCATTGTTTCGTAGCTACGGGGTGGGGCCGCTAGCTACGTTCAAGGTCACGT
CACCGCAAC	Or-Kf-Er_synthetic	AGCTACGATTAGCATCCCGTAGCTACGGGGTGGGGCCGCTAGCTACGTGACCTTGAACGT
CACCGCATT	Sf-Kr-Or-Ef_synthetic	AGCTACGCTCATTGTTTCGTAGCTAGCGGCCCCACCCCGTAGCTACGATTAGCATCCCGTAGCTACGTTCAAGGTCACGT
CACCGCTGA	Of-Sf-Er_synthetic	AGCTACGGGATGCTAATCGTAGCTACGCTCATTGTTTCGTAGCTACGTGACCTTGAACGT
CACCGGTAC	Kf-Sf-Er-Or_synthetic	AGCTACGGGGTGGGGCCGCTAGCTACGCTCATTGTTTCGTAGCTACGTGACCTTGAACGTAGCTACGATTAGCATCCCGT
CACCGGTTA	Or-Er-Sr-Kr_synthetic	AGCTACGATTAGCATCCCGTAGCTACGTGACCTTGAACGTAGCTACGAAACAATGAGCGTAGCTAGCGGCCCCACCCCGT
CACCGTGGT	Er-Kr-Sf-Or_synthetic	AGCTACGTGACCTTGAACGTAGCTAGCGGCCCCACCCCGTAGCTACGCTCATTGTTTCGTAGCTACGATTAGCATCCCGT
CACCGTTGG	Kr-Er-Sf-Of_synthetic	AGCTAGCGGCCCCACCCCGTAGCTACGTGACCTTGAACGTAGCTACGCTCATTGTTTCGTAGCTACGGGATGCTAATCGT
CACCTACAA	Er-Kf-Or_synthetic	AGCTACGTGACCTTGAACGTAGCTACGGGGTGGGGCCGCTAGCTACGATTAGCATCCCGT
CACCTACGG	Sr-Kf-Ef_synthetic	AGCTACGAAACAATGAGCGTAGCTACGGGGTGGGGCCGCTAGCTACGTTCAAGGTCACGT
CACCTGACC	Ef-Of-Sf_synthetic	AGCTACGTTCAAGGTCACGTAGCTACGGGATGCTAATCGTAGCTACGCTCATTGTTTCGT
CACCTGAGA	Kf-Er-Sf-Of_synthetic	AGCTACGGGGTGGGGCCGCTAGCTACGTGACCTTGAACGTAGCTACGCTCATTGTTTCGTAGCTACGGGATGCTAATCGT
CACCTGATT	Kr-Of-Er-Sr_synthetic	AGCTAGCGGCCCCACCCCGTAGCTACGGGATGCTAATCGTAGCTACGTGACCTTGAACGTAGCTACGAAACAATGAGCGT
CACCTTAGG	Kf-Or-Sf-Ef_synthetic	AGCTACGGGGTGGGGCCGCTAGCTACGATTAGCATCCCGTAGCTACGCTCATTGTTTCGTAGCTACGTTCAAGGTCACGT
CACCTTCCG	Sf-Er-Of-Kf_synthetic	AGCTACGCTCATTGTTTCGTAGCTACGTGACCTTGAACGTAGCTACGGGATGCTAATCGTAGCTACGGGGTGGGGCCGCT
CACCTTTAG	Of-Ef-Kr-Sf_synthetic	AGCTACGGGATGCTAATCGTAGCTACGTTCAAGGTCACGTAGCTAGCGGCCCCACCCCGTAGCTACGCTCATTGTTTCGT
CACGAAATT	Basal
CACGAAGTA	Sf-Er-Of-Kr_synthetic	AGCTACGCTCATTGTTTCGTAGCTACGTGACCTTGAACGTAGCTACGGGATGCTAATCGTAGCTAGCGGCCCCACCCCGT
CACGACGCT	Kf-Sf-Ef_synthetic	AGCTACGGGGTGGGGCCGCTAGCTACGCTCATTGTTTCGTAGCTACGTTCAAGGTCACGT
CACGAGATG	Sf-Er-Or-Kf_synthetic	AGCTACGCTCATTGTTTCGTAGCTACGTGACCTTGAACGTAGCTACGATTAGCATCCCGTAGCTACGGGGTGGGGCCGCT
CACGAGCTA	Kf-Ef-Or-Sr_synthetic	AGCTACGGGGTGGGGCCGCTAGCTACGTTCAAGGTCACGTAGCTACGATTAGCATCCCGTAGCTACGAAACAATGAGCGT
CACGATAAA	Of-Ef-Kr-Sf_synthetic	AGCTACGGGATGCTAATCGTAGCTACGTTCAAGGTCACGTAGCTAGCGGCCCCACCCCGTAGCTACGCTCATTGTTTCGT
CACGATCAT	Sf-Er-Kf_synthetic	AGCTACGCTCATTGTTTCGTAGCTACGTGACCTTGAACGTAGCTACGGGGTGGGGCCGCT
CACGCAGAG	Sf-Er-Or_synthetic	AGCTACGCTCATTGTTTCGTAGCTACGTGACCTTGAACGTAGCTACGATTAGCATCCCGT
CACGCAGTC	Kf-Er-Or-Sr_synthetic	AGCTACGGGGTGGGGCCGCTAGCTACGTGACCTTGAACGTAGCTACGATTAGCATCCCGTAGCTACGAAACAATGAGCGT
CACGCCTAA	Kf-Or-Er-Sr_synthetic	AGCTACGGGGTGGGGCCGCTAGCTACGATTAGCATCCCGTAGCTACGTGACCTTGAACGTAGCTACGAAACAATGAGCGT
CACGCTACC	Of-Ef-Kf_synthetic	AGCTACGGGATGCTAATCGTAGCTACGTTCAAGGTCACGTAGCTACGGGGTGGGGCCGCT
CACGCTAGG	Kf-Or-Sr-Er_synthetic	AGCTACGGGGTGGGGCCGCTAGCTACGATTAGCATCCCGTAGCTACGAAACAATGAGCGTAGCTACGTGACCTTGAACGT
CACGCTTCA	Kf-Sf-Ef-Of_synthetic	AGCTACGGGGTGGGGCCGCTAGCTACGCTCATTGTTTCGTAGCTACGTTCAAGGTCACGTAGCTACGGGATGCTAATCGT
CACGGGTCA	Ef-Sf-Kf-Of_synthetic	AGCTACGTTCAAGGTCACGTAGCTACGCTCATTGTTTCGTAGCTACGGGGTGGGGCCGCTAGCTACGGGATGCTAATCGT
CACGGTATG	Sr-Kf-Of-Er_synthetic	AGCTACGAAACAATGAGCGTAGCTACGGGGTGGGGCCGCTAGCTACGGGATGCTAATCGTAGCTACGTGACCTTGAACGT
CACGGTCTC	Ef-Kf-Or-Sr_synthetic	AGCTACGTTCAAGGTCACGTAGCTACGGGGTGGGGCCGCTAGCTACGATTAGCATCCCGTAGCTACGAAACAATGAGCGT
CACGGTGCA	Sf-Ef-Kf_synthetic	AGCTACGCTCATTGTTTCGTAGCTACGTTCAAGGTCACGTAGCTACGGGGTGGGGCCGCT
CACGTAATG	Kr-Of-Sr_synthetic	AGCTAGCGGCCCCACCCCGTAGCTACGGGATGCTAATCGTAGCTACGAAACAATGAGCGT
CACGTACAT	Sf-Of_synthetic	AGCTACGCTCATTGTTTCGTAGCTACGGGATGCTAATCGT
CACGTCAGA	Sf-Kf-Or-Er_synthetic	AGCTACGCTCATTGTTTCGTAGCTACGGGGTGGGGCCGCTAGCTACGATTAGCATCCCGTAGCTACGTGACCTTGAACGT
CACGTCTCT	Kf-Ef-Sr-Of_synthetic	AGCTACGGGGTGGGGCCGCTAGCTACGTTCAAGGTCACGTAGCTACGAAACAATGAGCGTAGCTACGGGATGCTAATCGT
CACGTCTTA	Of-Sf-Er_synthetic	AGCTACGGGATGCTAATCGTAGCTACGCTCATTGTTTCGTAGCTACGTGACCTTGAACGT
CACGTGAGG	Sr-Kr-Ef-Of_synthetic	AGCTACGAAACAATGAGCGTAGCTAGCGGCCCCACCCCGTAGCTACGTTCAAGGTCACGTAGCTACGGGATGCTAATCGT
CACGTGCTC	Ef-Of-Kr-Sf_synthetic	AGCTACGTTCAAGGTCACGTAGCTACGGGATGCTAATCGTAGCTAGCGGCCCCACCCCGTAGCTACGCTCATTGTTTCGT
CACGTTGTC	Or-Kr-Sr_synthetic	AGCTACGATTAGCATCCCGTAGCTAGCGGCCCCACCCCGTAGCTACGAAACAATGAGCGT
CACTACAGT	Or-Sf-Kr-Ef_synthetic	AGCTACGATTAGCATCCCGTAGCTACGCTCATTGTTTCGTAGCTAGCGGCCCCACCCCGTAGCTACGTTCAAGGTCACGT
CACTACATC	Kr-Sf-Er-Or_synthetic	AGCTAGCGGCCCCACCCCGTAGCTACGCTCATTGTTTCGTAGCTACGTGACCTTGAACGTAGCTACGATTAGCATCCCGT
CACTAGACC	Or-Ef-Sr-Kr_synthetic	AGCTACGATTAGCATCCCGTAGCTACGTTCAAGGTCACGTAGCTACGAAACAATGAGCGTAGCTAGCGGCCCCACCCCGT
CACTAGGAC	SrKf_CMF-Scalar	AGCTACGAAACAATGAGCGTAGCTACGGGGCGGGGCCGCT
CACTAGTGT	Sf-Kf-Er_synthetic	AGCTACGCTCATTGTTTCGTAGCTACGGGGTGGGGCCGCTAGCTACGTGACCTTGAACGT
CACTATACG	Or-Er-Sf-Kr_synthetic	AGCTACGATTAGCATCCCGTAGCTACGTGACCTTGAACGTAGCTACGCTCATTGTTTCGTAGCTAGCGGCCCCACCCCGT
CACTATTGG	Of-Sf-Er-Kf_synthetic	AGCTACGGGATGCTAATCGTAGCTACGCTCATTGTTTCGTAGCTACGTGACCTTGAACGTAGCTACGGGGTGGGGCCGCT
CACTCAAGG	Or-Kr-Sr-Er_synthetic	AGCTACGATTAGCATCCCGTAGCTAGCGGCCCCACCCCGTAGCTACGAAACAATGAGCGTAGCTACGTGACCTTGAACGT
CACTCAGCT	SfOfSfKf_CMF-Scalar	AGCTACGCTCATTGTTTCGTAGCTACGGGATGCTAATCGTAGCTACGCTCATTGTTTCGTAGCTACGGGGCGGGGCCGCT
CACTCCCAA	Ef-Of-Kr-Sf_synthetic	AGCTACGTTCAAGGTCACGTAGCTACGGGATGCTAATCGTAGCTAGCGGCCCCACCCCGTAGCTACGCTCATTGTTTCGT
CACTCGTAC	Sf-Kr-Or-Ef_synthetic	AGCTACGCTCATTGTTTCGTAGCTAGCGGCCCCACCCCGTAGCTACGATTAGCATCCCGTAGCTACGTTCAAGGTCACGT
CACTCGTTG	Or-Kr-Sr-Er_synthetic	AGCTACGATTAGCATCCCGTAGCTAGCGGCCCCACCCCGTAGCTACGAAACAATGAGCGTAGCTACGTGACCTTGAACGT
CACTCTGAA	Ef-Of-Sr-Kr_synthetic	AGCTACGTTCAAGGTCACGTAGCTACGGGATGCTAATCGTAGCTACGAAACAATGAGCGTAGCTAGCGGCCCCACCCCGT
CACTGAACT	Er-Of-Kf-Sr_synthetic	AGCTACGTGACCTTGAACGTAGCTACGGGATGCTAATCGTAGCTACGGGGTGGGGCCGCTAGCTACGAAACAATGAGCGT
CACTGAGAG	Kr-Ef-Sr-Of_synthetic	AGCTAGCGGCCCCACCCCGTAGCTACGTTCAAGGTCACGTAGCTACGAAACAATGAGCGTAGCTACGGGATGCTAATCGT
CACTGATAT	Er-Of-Kf-Sf_synthetic	AGCTACGTGACCTTGAACGTAGCTACGGGATGCTAATCGTAGCTACGGGGTGGGGCCGCTAGCTACGCTCATTGTTTCGT
CACTGCACG	Er-Kf-Of-Sr_synthetic	AGCTACGTGACCTTGAACGTAGCTACGGGGTGGGGCCGCTAGCTACGGGATGCTAATCGTAGCTACGAAACAATGAGCGT
CACTGGAAC	Sf-Ef-Kr-Or_synthetic	AGCTACGCTCATTGTTTCGTAGCTACGTTCAAGGTCACGTAGCTAGCGGCCCCACCCCGTAGCTACGATTAGCATCCCGT
CACTGGGAA	Ef-Of-Kr-Sr_synthetic	AGCTACGTTCAAGGTCACGTAGCTACGGGATGCTAATCGTAGCTAGCGGCCCCACCCCGTAGCTACGAAACAATGAGCGT
CACTGGTCC	Of-Sr-Ef-Kr_synthetic	AGCTACGGGATGCTAATCGTAGCTACGAAACAATGAGCGTAGCTACGTTCAAGGTCACGTAGCTAGCGGCCCCACCCCGT
CACTGTCAA	Sr-Ef-Of_synthetic	AGCTACGAAACAATGAGCGTAGCTACGTTCAAGGTCACGTAGCTACGGGATGCTAATCGT
CACTGTGAT	Kr-Er-Sf-Of_synthetic	AGCTAGCGGCCCCACCCCGTAGCTACGTGACCTTGAACGTAGCTACGCTCATTGTTTCGTAGCTACGGGATGCTAATCGT
CACTGTTTG	Er-Of-Kf-Sr_synthetic	AGCTACGTGACCTTGAACGTAGCTACGGGATGCTAATCGTAGCTACGGGGTGGGGCCGCTAGCTACGAAACAATGAGCGT
CACTTACCG	Or-Ef-Sf-Kf_synthetic	AGCTACGATTAGCATCCCGTAGCTACGTTCAAGGTCACGTAGCTACGCTCATTGTTTCGTAGCTACGGGGTGGGGCCGCT
CACTTCGAG	Sf-Or-Er-Kf_synthetic	AGCTACGCTCATTGTTTCGTAGCTACGATTAGCATCCCGTAGCTACGTGACCTTGAACGTAGCTACGGGGTGGGGCCGCT
CACTTCGTC	Sf-Of-Kr-Er_synthetic	AGCTACGCTCATTGTTTCGTAGCTACGGGATGCTAATCGTAGCTAGCGGCCCCACCCCGTAGCTACGTGACCTTGAACGT
CACTTCTTG	Sr-Kr-Of_synthetic	AGCTACGAAACAATGAGCGTAGCTAGCGGCCCCACCCCGTAGCTACGGGATGCTAATCGT
CACTTTGGG	Er-Kf-Sf-Of_synthetic	AGCTACGTGACCTTGAACGTAGCTACGGGGTGGGGCCGCTAGCTACGCTCATTGTTTCGTAGCTACGGGATGCTAATCGT
CACTTTGTA	Ef-Or-Kf-Sf_synthetic	AGCTACGTTCAAGGTCACGTAGCTACGATTAGCATCCCGTAGCTACGGGGTGGGGCCGCTAGCTACGCTCATTGTTTCGT
CAGAAAGAC	Sr-Ef-Or_synthetic	AGCTACGAAACAATGAGCGTAGCTACGTTCAAGGTCACGTAGCTACGATTAGCATCCCGT
CAGAAATCT	Sr-Or_synthetic	AGCTACGAAACAATGAGCGTAGCTACGATTAGCATCCCGT
CAGAAGGCA	Ef-Kr-Of-Sf_synthetic	AGCTACGTTCAAGGTCACGTAGCTAGCGGCCCCACCCCGTAGCTACGGGATGCTAATCGTAGCTACGCTCATTGTTTCGT
CAGAAGGTC	Sr-Er-Kr-Of_synthetic	AGCTACGAAACAATGAGCGTAGCTACGTGACCTTGAACGTAGCTAGCGGCCCCACCCCGTAGCTACGGGATGCTAATCGT
CAGAATACG	Er-Kf-Of-Sr_synthetic	AGCTACGTGACCTTGAACGTAGCTACGGGGTGGGGCCGCTAGCTACGGGATGCTAATCGTAGCTACGAAACAATGAGCGT
CAGACGAAG	Kr-Er-Sr-Of_synthetic	AGCTAGCGGCCCCACCCCGTAGCTACGTGACCTTGAACGTAGCTACGAAACAATGAGCGTAGCTACGGGATGCTAATCGT
CAGAGAATC	Sf-Er-Or-Kf_synthetic	AGCTACGCTCATTGTTTCGTAGCTACGTGACCTTGAACGTAGCTACGATTAGCATCCCGTAGCTACGGGGTGGGGCCGCT
CAGAGAGAA	Sf-Kf-Ef-Or_synthetic	AGCTACGCTCATTGTTTCGTAGCTACGGGGTGGGGCCGCTAGCTACGTTCAAGGTCACGTAGCTACGATTAGCATCCCGT
CAGAGATAC	Ef-Sr-Of_synthetic	AGCTACGTTCAAGGTCACGTAGCTACGAAACAATGAGCGTAGCTACGGGATGCTAATCGT
CAGAGCAGT	Sf-Ef-Of-Kf_synthetic	AGCTACGCTCATTGTTTCGTAGCTACGTTCAAGGTCACGTAGCTACGGGATGCTAATCGTAGCTACGGGGTGGGGCCGCT
CAGAGTATA	Er-Kr-Sf-Of_synthetic	AGCTACGTGACCTTGAACGTAGCTAGCGGCCCCACCCCGTAGCTACGCTCATTGTTTCGTAGCTACGGGATGCTAATCGT
CAGAGTCGA	Er-Kr-Sf-Or_synthetic	AGCTACGTGACCTTGAACGTAGCTAGCGGCCCCACCCCGTAGCTACGCTCATTGTTTCGTAGCTACGATTAGCATCCCGT
CAGAGTGAC	Of-Sr-Ef-Kr_synthetic	AGCTACGGGATGCTAATCGTAGCTACGAAACAATGAGCGTAGCTACGTTCAAGGTCACGTAGCTAGCGGCCCCACCCCGT
CAGATAACG	Sf-Er-Kr_synthetic	AGCTACGCTCATTGTTTCGTAGCTACGTGACCTTGAACGTAGCTAGCGGCCCCACCCCGT
CAGATCACT	Or-Er-Sr_synthetic	AGCTACGATTAGCATCCCGTAGCTACGTGACCTTGAACGTAGCTACGAAACAATGAGCGT
CAGATCTAC	Sf-Kf_synthetic	AGCTACGCTCATTGTTTCGTAGCTACGGGGTGGGGCCGCT
CAGATGCAA	Of-Ef-Sr_synthetic	AGCTACGGGATGCTAATCGTAGCTACGTTCAAGGTCACGTAGCTACGAAACAATGAGCGT
CAGATGGCT	Sr-Ef-Kf-Or_synthetic	AGCTACGAAACAATGAGCGTAGCTACGTTCAAGGTCACGTAGCTACGGGGTGGGGCCGCTAGCTACGATTAGCATCCCGT
CAGATTGTC	Or-Sf-Kf-Er_synthetic	AGCTACGATTAGCATCCCGTAGCTACGCTCATTGTTTCGTAGCTACGGGGTGGGGCCGCTAGCTACGTGACCTTGAACGT
CAGCAAGCG	Kr-Ef-Sr-Or_synthetic	AGCTAGCGGCCCCACCCCGTAGCTACGTTCAAGGTCACGTAGCTACGAAACAATGAGCGTAGCTACGATTAGCATCCCGT
CAGCAAGTC	Kf-Sf-Of-Ef_synthetic	AGCTACGGGGTGGGGCCGCTAGCTACGCTCATTGTTTCGTAGCTACGGGATGCTAATCGTAGCTACGTTCAAGGTCACGT
CAGCACAAC	Of-Kf-Sr_synthetic	AGCTACGGGATGCTAATCGTAGCTACGGGGTGGGGCCGCTAGCTACGAAACAATGAGCGT
CAGCACCAT	Or-Kf-Ef-Sr_synthetic	AGCTACGATTAGCATCCCGTAGCTACGGGGTGGGGCCGCTAGCTACGTTCAAGGTCACGTAGCTACGAAACAATGAGCGT
CAGCACGAG	Kr-Or-Sf-Er_synthetic	AGCTAGCGGCCCCACCCCGTAGCTACGATTAGCATCCCGTAGCTACGCTCATTGTTTCGTAGCTACGTGACCTTGAACGT
CAGCACTTA	Sf-Kr-Or_synthetic	AGCTACGCTCATTGTTTCGTAGCTAGCGGCCCCACCCCGTAGCTACGATTAGCATCCCGT
CAGCAGATG	Sf-Kf-Ef-Of_synthetic	AGCTACGCTCATTGTTTCGTAGCTACGGGGTGGGGCCGCTAGCTACGTTCAAGGTCACGTAGCTACGGGATGCTAATCGT
CAGCAGTGG	Kf-Or-Ef-Sf_synthetic	AGCTACGGGGTGGGGCCGCTAGCTACGATTAGCATCCCGTAGCTACGTTCAAGGTCACGTAGCTACGCTCATTGTTTCGT
CAGCCAATT	Er-Sr-Of_synthetic	AGCTACGTGACCTTGAACGTAGCTACGAAACAATGAGCGTAGCTACGGGATGCTAATCGT
CAGCCAGCA	Sf-Ef-Kr-Or_synthetic	AGCTACGCTCATTGTTTCGTAGCTACGTTCAAGGTCACGTAGCTAGCGGCCCCACCCCGTAGCTACGATTAGCATCCCGT
CAGCCATAA	Ef-Sf-Kr_synthetic	AGCTACGTTCAAGGTCACGTAGCTACGCTCATTGTTTCGTAGCTAGCGGCCCCACCCCGT
CAGCCATGT	Of-Kr-Er_synthetic	AGCTACGGGATGCTAATCGTAGCTAGCGGCCCCACCCCGTAGCTACGTGACCTTGAACGT
CAGCCTGGT	Or-Er-Kf-Sr_synthetic	AGCTACGATTAGCATCCCGTAGCTACGTGACCTTGAACGTAGCTACGGGGTGGGGCCGCTAGCTACGAAACAATGAGCGT
CAGCGACTG	Sr-Of-Er_synthetic	AGCTACGAAACAATGAGCGTAGCTACGGGATGCTAATCGTAGCTACGTGACCTTGAACGT
CAGCGAGTT	Or-Ef-Sr-Kf_synthetic	AGCTACGATTAGCATCCCGTAGCTACGTTCAAGGTCACGTAGCTACGAAACAATGAGCGTAGCTACGGGGTGGGGCCGCT
CAGCGTCCT	Or-Sf-Ef-Kf_synthetic	AGCTACGATTAGCATCCCGTAGCTACGCTCATTGTTTCGTAGCTACGTTCAAGGTCACGTAGCTACGGGGTGGGGCCGCT
CAGCTAATG	Or-Sr-Ef_synthetic	AGCTACGATTAGCATCCCGTAGCTACGAAACAATGAGCGTAGCTACGTTCAAGGTCACGT
CAGCTACCG	Sr-Of-Er-Kr_synthetic	AGCTACGAAACAATGAGCGTAGCTACGGGATGCTAATCGTAGCTACGTGACCTTGAACGTAGCTAGCGGCCCCACCCCGT
CAGCTATGA	Sf-Ef-Of-Kr_synthetic	AGCTACGCTCATTGTTTCGTAGCTACGTTCAAGGTCACGTAGCTACGGGATGCTAATCGTAGCTAGCGGCCCCACCCCGT
CAGCTGAGG	Kf-Ef-Or-Sf_synthetic	AGCTACGGGGTGGGGCCGCTAGCTACGTTCAAGGTCACGTAGCTACGATTAGCATCCCGTAGCTACGCTCATTGTTTCGT
CAGCTGCAC	Or-Kf-Sf-Ef_synthetic	AGCTACGATTAGCATCCCGTAGCTACGGGGTGGGGCCGCTAGCTACGCTCATTGTTTCGTAGCTACGTTCAAGGTCACGT
CAGCTGCTA	Or-Sf-Kr-Er_synthetic	AGCTACGATTAGCATCCCGTAGCTACGCTCATTGTTTCGTAGCTAGCGGCCCCACCCCGTAGCTACGTGACCTTGAACGT
CAGCTGTCG	Kr-Sf-Ef_synthetic	AGCTAGCGGCCCCACCCCGTAGCTACGCTCATTGTTTCGTAGCTACGTTCAAGGTCACGT
CAGCTTACT	Of-Er-Kr_synthetic	AGCTACGGGATGCTAATCGTAGCTACGTGACCTTGAACGTAGCTAGCGGCCCCACCCCGT
CAGCTTCAG	Of-Kf-Sf-Ef_synthetic	AGCTACGGGATGCTAATCGTAGCTACGGGGTGGGGCCGCTAGCTACGCTCATTGTTTCGTAGCTACGTTCAAGGTCACGT
CAGCTTTCC	Sf-Of-Er-Kf_synthetic	AGCTACGCTCATTGTTTCGTAGCTACGGGATGCTAATCGTAGCTACGTGACCTTGAACGTAGCTACGGGGTGGGGCCGCT
CAGGAACTC	Ef-Of-Sf_synthetic	AGCTACGTTCAAGGTCACGTAGCTACGGGATGCTAATCGTAGCTACGCTCATTGTTTCGT
CAGGAATGA	Kr-Er-Sf-Of_synthetic	AGCTAGCGGCCCCACCCCGTAGCTACGTGACCTTGAACGTAGCTACGCTCATTGTTTCGTAGCTACGGGATGCTAATCGT
CAGGACAGT	Sf-Ef-Kf-Or_synthetic	AGCTACGCTCATTGTTTCGTAGCTACGTTCAAGGTCACGTAGCTACGGGGTGGGGCCGCTAGCTACGATTAGCATCCCGT
CAGGAGTAT	Kf-Ef-Of-Sr_synthetic	AGCTACGGGGTGGGGCCGCTAGCTACGTTCAAGGTCACGTAGCTACGGGATGCTAATCGTAGCTACGAAACAATGAGCGT
CAGGATGAC	Sr-Er-Or-Kr_synthetic	AGCTACGAAACAATGAGCGTAGCTACGTGACCTTGAACGTAGCTACGATTAGCATCCCGTAGCTAGCGGCCCCACCCCGT
CAGGCAGAC	Ef-Kf-Of-Sf_synthetic	AGCTACGTTCAAGGTCACGTAGCTACGGGGTGGGGCCGCTAGCTACGGGATGCTAATCGTAGCTACGCTCATTGTTTCGT
CAGGCCTAT	Kf-Or-Ef-Sr_synthetic	AGCTACGGGGTGGGGCCGCTAGCTACGATTAGCATCCCGTAGCTACGTTCAAGGTCACGTAGCTACGAAACAATGAGCGT
CAGGCGTGT	Or-Kr-Sf-Ef_synthetic	AGCTACGATTAGCATCCCGTAGCTAGCGGCCCCACCCCGTAGCTACGCTCATTGTTTCGTAGCTACGTTCAAGGTCACGT
CAGGCTAGA	Or-Kf-Sr_synthetic	AGCTACGATTAGCATCCCGTAGCTACGGGGTGGGGCCGCTAGCTACGAAACAATGAGCGT
CAGGCTCCA	Or-Er-Sr_synthetic	AGCTACGATTAGCATCCCGTAGCTACGTGACCTTGAACGTAGCTACGAAACAATGAGCGT
CAGGCTGAT	Kr-Sf-Er-Of_synthetic	AGCTAGCGGCCCCACCCCGTAGCTACGCTCATTGTTTCGTAGCTACGTGACCTTGAACGTAGCTACGGGATGCTAATCGT
CAGGGAACG	Or-Ef-Sr_synthetic	AGCTACGATTAGCATCCCGTAGCTACGTTCAAGGTCACGTAGCTACGAAACAATGAGCGT
CAGGGAATA	Of-Kr-Sf_synthetic	AGCTACGGGATGCTAATCGTAGCTAGCGGCCCCACCCCGTAGCTACGCTCATTGTTTCGT
CAGGGCCAA	Kr-Sr-Er_synthetic	AGCTAGCGGCCCCACCCCGTAGCTACGAAACAATGAGCGTAGCTACGTGACCTTGAACGT
CAGGGCCTT	Sf-Of-Er-Kr_synthetic	AGCTACGCTCATTGTTTCGTAGCTACGGGATGCTAATCGTAGCTACGTGACCTTGAACGTAGCTAGCGGCCCCACCCCGT
CAGGGCTTA	Kf-Sr-Ef_synthetic	AGCTACGGGGTGGGGCCGCTAGCTACGAAACAATGAGCGTAGCTACGTTCAAGGTCACGT
CAGGGTGTC	Or-Sf-Kr_synthetic	AGCTACGATTAGCATCCCGTAGCTACGCTCATTGTTTCGTAGCTAGCGGCCCCACCCCGT
CAGGTCATT	Sf-Kf-Er_synthetic	AGCTACGCTCATTGTTTCGTAGCTACGGGGTGGGGCCGCTAGCTACGTGACCTTGAACGT
CAGGTCGCA	Of-Kf-Sf_synthetic	AGCTACGGGATGCTAATCGTAGCTACGGGGTGGGGCCGCTAGCTACGCTCATTGTTTCGT
CAGGTCGTC	Kf-Ef-Of-Sf_synthetic	AGCTACGGGGTGGGGCCGCTAGCTACGTTCAAGGTCACGTAGCTACGGGATGCTAATCGTAGCTACGCTCATTGTTTCGT
CAGGTGAGA	Ef-Sf-Kf-Or_synthetic	AGCTACGTTCAAGGTCACGTAGCTACGCTCATTGTTTCGTAGCTACGGGGTGGGGCCGCTAGCTACGATTAGCATCCCGT
CAGGTGCTT	Or-Sf-Er-Kr_synthetic	AGCTACGATTAGCATCCCGTAGCTACGCTCATTGTTTCGTAGCTACGTGACCTTGAACGTAGCTAGCGGCCCCACCCCGT
CAGGTGGTA	Or-Kr-Er-Sr_synthetic	AGCTACGATTAGCATCCCGTAGCTAGCGGCCCCACCCCGTAGCTACGTGACCTTGAACGTAGCTACGAAACAATGAGCGT
CAGGTGTTC	Of-Kr-Ef-Sf_synthetic	AGCTACGGGATGCTAATCGTAGCTAGCGGCCCCACCCCGTAGCTACGTTCAAGGTCACGTAGCTACGCTCATTGTTTCGT
CAGGTTAAA	Or-Er-Kf-Sr_synthetic	AGCTACGATTAGCATCCCGTAGCTACGTGACCTTGAACGTAGCTACGGGGTGGGGCCGCTAGCTACGAAACAATGAGCGT
CAGGTTTGC	Kr-Of_synthetic	AGCTAGCGGCCCCACCCCGTAGCTACGGGATGCTAATCGT
CAGTAACGG	Er-Kr-Of-Sf_synthetic	AGCTACGTGACCTTGAACGTAGCTAGCGGCCCCACCCCGTAGCTACGGGATGCTAATCGTAGCTACGCTCATTGTTTCGT
CAGTAAGTT	Sf-Of-Kr_synthetic	AGCTACGCTCATTGTTTCGTAGCTACGGGATGCTAATCGTAGCTAGCGGCCCCACCCCGT
CAGTACTAA	Of-Er-Sf_synthetic	AGCTACGGGATGCTAATCGTAGCTACGTGACCTTGAACGTAGCTACGCTCATTGTTTCGT
CAGTACTTG	Sr-Er-Or_synthetic	AGCTACGAAACAATGAGCGTAGCTACGTGACCTTGAACGTAGCTACGATTAGCATCCCGT
CAGTAGAAG	Sr-Or-Kr-Ef_synthetic	AGCTACGAAACAATGAGCGTAGCTACGATTAGCATCCCGTAGCTAGCGGCCCCACCCCGTAGCTACGTTCAAGGTCACGT
CAGTAGATT	Sr-Kf-Ef_synthetic	AGCTACGAAACAATGAGCGTAGCTACGGGGTGGGGCCGCTAGCTACGTTCAAGGTCACGT
CAGTAGGCC	Kf-Sf-Of_synthetic	AGCTACGGGGTGGGGCCGCTAGCTACGCTCATTGTTTCGTAGCTACGGGATGCTAATCGT
CAGTATACA	Sr-Er-Of-Kr_synthetic	AGCTACGAAACAATGAGCGTAGCTACGTGACCTTGAACGTAGCTACGGGATGCTAATCGTAGCTAGCGGCCCCACCCCGT
CAGTATATC	Of-Kf-Ef_synthetic	AGCTACGGGATGCTAATCGTAGCTACGGGGTGGGGCCGCTAGCTACGTTCAAGGTCACGT
CAGTATCAT	Sr-Er-Or_synthetic	AGCTACGAAACAATGAGCGTAGCTACGTGACCTTGAACGTAGCTACGATTAGCATCCCGT
CAGTATTCC	Sr-Er-Or_synthetic	AGCTACGAAACAATGAGCGTAGCTACGTGACCTTGAACGTAGCTACGATTAGCATCCCGT
CAGTCAGAT	Or-Sf-Kr_synthetic	AGCTACGATTAGCATCCCGTAGCTACGCTCATTGTTTCGTAGCTAGCGGCCCCACCCCGT
CAGTCAGTG	Kf-Of_synthetic	AGCTACGGGGTGGGGCCGCTAGCTACGGGATGCTAATCGT
CAGTCATTC	Of-Er_synthetic	AGCTACGGGATGCTAATCGTAGCTACGTGACCTTGAACGT
CAGTCCGTT	Kr-Sf-Or-Er_synthetic	AGCTAGCGGCCCCACCCCGTAGCTACGCTCATTGTTTCGTAGCTACGATTAGCATCCCGTAGCTACGTGACCTTGAACGT
CAGTCGTGA	Kr-Sf-Ef_synthetic	AGCTAGCGGCCCCACCCCGTAGCTACGCTCATTGTTTCGTAGCTACGTTCAAGGTCACGT
CAGTCTAAC	Sr-Kr-Of-Ef_synthetic	AGCTACGAAACAATGAGCGTAGCTAGCGGCCCCACCCCGTAGCTACGGGATGCTAATCGTAGCTACGTTCAAGGTCACGT
CAGTCTTCA	Er-Kr-Or_synthetic	AGCTACGTGACCTTGAACGTAGCTAGCGGCCCCACCCCGTAGCTACGATTAGCATCCCGT
CAGTGATTA	Kf-Of-Er_synthetic	AGCTACGGGGTGGGGCCGCTAGCTACGGGATGCTAATCGTAGCTACGTGACCTTGAACGT
CAGTGGAAT	Er-Or-Sf_synthetic	AGCTACGTGACCTTGAACGTAGCTACGATTAGCATCCCGTAGCTACGCTCATTGTTTCGT
CAGTGTGGT	Basal
CAGTTAGCC	Er-Kf-Of_synthetic	AGCTACGTGACCTTGAACGTAGCTACGGGGTGGGGCCGCTAGCTACGGGATGCTAATCGT
CAGTTCTAT	Kf-Sf-Of_synthetic	AGCTACGGGGTGGGGCCGCTAGCTACGCTCATTGTTTCGTAGCTACGGGATGCTAATCGT
CAGTTGCCT	KfEfSfEf_CMF-Scalar	AGCTACGGGGCGGGGCCGCTAGCTACGTTCAAGGTCACGTAGCTACGCTCATTGTTTCGTAGCTACGTTCAAGGTCACGT
CAGTTTAAG	Or-Kf-Sf-Er_synthetic	AGCTACGATTAGCATCCCGTAGCTACGGGGTGGGGCCGCTAGCTACGCTCATTGTTTCGTAGCTACGTGACCTTGAACGT
CAGTTTGAC	Ef-Or-Kr-Sr_synthetic	AGCTACGTTCAAGGTCACGTAGCTACGATTAGCATCCCGTAGCTAGCGGCCCCACCCCGTAGCTACGAAACAATGAGCGT
CATAAAGGG	Sf-Ef-Or-Kf_synthetic	AGCTACGCTCATTGTTTCGTAGCTACGTTCAAGGTCACGTAGCTACGATTAGCATCCCGTAGCTACGGGGTGGGGCCGCT
CATAACACG	Ef-Sf_synthetic	AGCTACGTTCAAGGTCACGTAGCTACGCTCATTGTTTCGT
CATAATAGC	Kf-Or-Ef_synthetic	AGCTACGGGGTGGGGCCGCTAGCTACGATTAGCATCCCGTAGCTACGTTCAAGGTCACGT
CATAATCTG	Kf-Ef_synthetic	AGCTACGGGGTGGGGCCGCTAGCTACGTTCAAGGTCACGT
CATACCATT	Sf-Kr-Or-Ef_synthetic	AGCTACGCTCATTGTTTCGTAGCTAGCGGCCCCACCCCGTAGCTACGATTAGCATCCCGTAGCTACGTTCAAGGTCACGT
CATACCGCG	KfSfKfEr_CMF-Scalar	AGCTACGGGGCGGGGCCGCTAGCTACGCTCATTGTTTCGTAGCTACGGGGCGGGGCCGCTAGCTACGTGACCTTGAACGT
CATACCTTC	Kf-Of-Ef_synthetic	AGCTACGGGGTGGGGCCGCTAGCTACGGGATGCTAATCGTAGCTACGTTCAAGGTCACGT
CATACGCGC	Or-Er_synthetic	AGCTACGATTAGCATCCCGTAGCTACGTGACCTTGAACGT
CATACGGCT	Kf-Ef-Sr_synthetic	AGCTACGGGGTGGGGCCGCTAGCTACGTTCAAGGTCACGTAGCTACGAAACAATGAGCGT
CATACGGTC	Kf-Sr-Or-Ef_synthetic	AGCTACGGGGTGGGGCCGCTAGCTACGAAACAATGAGCGTAGCTACGATTAGCATCCCGTAGCTACGTTCAAGGTCACGT
CATACTACT	Kf-Sr_synthetic	AGCTACGGGGTGGGGCCGCTAGCTACGAAACAATGAGCGT
CATACTCAA	KfSfKfEr_CMF-Scalar	AGCTACGGGGCGGGGCCGCTAGCTACGCTCATTGTTTCGTAGCTACGGGGCGGGGCCGCTAGCTACGTGACCTTGAACGT
CATACTCTC	Kr-Or-Er-Sf_synthetic	AGCTAGCGGCCCCACCCCGTAGCTACGATTAGCATCCCGTAGCTACGTGACCTTGAACGTAGCTACGCTCATTGTTTCGT
CATACTGAT	Er-Sf-Of-Kr_synthetic	AGCTACGTGACCTTGAACGTAGCTACGCTCATTGTTTCGTAGCTACGGGATGCTAATCGTAGCTAGCGGCCCCACCCCGT
CATACTTGC	Sf-Ef-Kr-Of_synthetic	AGCTACGCTCATTGTTTCGTAGCTACGTTCAAGGTCACGTAGCTAGCGGCCCCACCCCGTAGCTACGGGATGCTAATCGT
CATAGATCT	Or-Kr-Sr-Ef_synthetic	AGCTACGATTAGCATCCCGTAGCTAGCGGCCCCACCCCGTAGCTACGAAACAATGAGCGTAGCTACGTTCAAGGTCACGT
CATAGCATA	Sr-Er_synthetic	AGCTACGAAACAATGAGCGTAGCTACGTGACCTTGAACGT
CATAGGCCC	Sf-Er-Of_synthetic	AGCTACGCTCATTGTTTCGTAGCTACGTGACCTTGAACGTAGCTACGGGATGCTAATCGT
CATAGTCGT	Kr-Sr_synthetic	AGCTAGCGGCCCCACCCCGTAGCTACGAAACAATGAGCGT
CATAGTGGC	Sf-Ef-Kr-Or_synthetic	AGCTACGCTCATTGTTTCGTAGCTACGTTCAAGGTCACGTAGCTAGCGGCCCCACCCCGTAGCTACGATTAGCATCCCGT
CATAGTTCC	Ef-Sr-Or-Kf_synthetic	AGCTACGTTCAAGGTCACGTAGCTACGAAACAATGAGCGTAGCTACGATTAGCATCCCGTAGCTACGGGGTGGGGCCGCT
CATATAGGC	Ef-Or_synthetic	AGCTACGTTCAAGGTCACGTAGCTACGATTAGCATCCCGT
CATATATCG	Or-Kr-Sf-Er_synthetic	AGCTACGATTAGCATCCCGTAGCTAGCGGCCCCACCCCGTAGCTACGCTCATTGTTTCGTAGCTACGTGACCTTGAACGT
CATATCCCG	Er-Of-Kr_synthetic	AGCTACGTGACCTTGAACGTAGCTACGGGATGCTAATCGTAGCTAGCGGCCCCACCCCGT
CATATGGTG	Sf-Kf-Ef-Or_synthetic	AGCTACGCTCATTGTTTCGTAGCTACGGGGTGGGGCCGCTAGCTACGTTCAAGGTCACGTAGCTACGATTAGCATCCCGT
CATATGTCC	Kr-Er-Sr_synthetic	AGCTAGCGGCCCCACCCCGTAGCTACGTGACCTTGAACGTAGCTACGAAACAATGAGCGT
CATATTCCT	Sr-Kr-Ef-Or_synthetic	AGCTACGAAACAATGAGCGTAGCTAGCGGCCCCACCCCGTAGCTACGTTCAAGGTCACGTAGCTACGATTAGCATCCCGT
CATATTCGA	Or-Ef-Sr-Kf_synthetic	AGCTACGATTAGCATCCCGTAGCTACGTTCAAGGTCACGTAGCTACGAAACAATGAGCGTAGCTACGGGGTGGGGCCGCT
CATCAACGT	Kf-Sr-Or-Er_synthetic	AGCTACGGGGTGGGGCCGCTAGCTACGAAACAATGAGCGTAGCTACGATTAGCATCCCGTAGCTACGTGACCTTGAACGT
CATCAAGGA	Kf-Of-Ef-Sr_synthetic	AGCTACGGGGTGGGGCCGCTAGCTACGGGATGCTAATCGTAGCTACGTTCAAGGTCACGTAGCTACGAAACAATGAGCGT
CATCAATGG	Or-Ef-Sf-Kf_synthetic	AGCTACGATTAGCATCCCGTAGCTACGTTCAAGGTCACGTAGCTACGCTCATTGTTTCGTAGCTACGGGGTGGGGCCGCT
CATCACTAC	Or-Er-Kf-Sf_synthetic	AGCTACGATTAGCATCCCGTAGCTACGTGACCTTGAACGTAGCTACGGGGTGGGGCCGCTAGCTACGCTCATTGTTTCGT
CATCACTTG	Of-Sf-Ef-Kr_synthetic	AGCTACGGGATGCTAATCGTAGCTACGCTCATTGTTTCGTAGCTACGTTCAAGGTCACGTAGCTAGCGGCCCCACCCCGT
CATCAGGCA	Er-Or-Kf_synthetic	AGCTACGTGACCTTGAACGTAGCTACGATTAGCATCCCGTAGCTACGGGGTGGGGCCGCT
CATCAGTCG	Of-Sf-Ef_synthetic	AGCTACGGGATGCTAATCGTAGCTACGCTCATTGTTTCGTAGCTACGTTCAAGGTCACGT
CATCATGTT	Ef-Kr-Of-Sr_synthetic	AGCTACGTTCAAGGTCACGTAGCTAGCGGCCCCACCCCGTAGCTACGGGATGCTAATCGTAGCTACGAAACAATGAGCGT
CATCCAACC	Er-Sf-Or-Kr_synthetic	AGCTACGTGACCTTGAACGTAGCTACGCTCATTGTTTCGTAGCTACGATTAGCATCCCGTAGCTAGCGGCCCCACCCCGT
CATCCAGAA	Kf-Ef-Sf-Of_synthetic	AGCTACGGGGTGGGGCCGCTAGCTACGTTCAAGGTCACGTAGCTACGCTCATTGTTTCGTAGCTACGGGATGCTAATCGT
CATCCAGCT	Er-Kf-Or_synthetic	AGCTACGTGACCTTGAACGTAGCTACGGGGTGGGGCCGCTAGCTACGATTAGCATCCCGT
CATCCAGTC	SrKf_CMF-Scalar	AGCTACGAAACAATGAGCGTAGCTACGGGGCGGGGCCGCT
CATCCATAC	Sf-Or-Kf_synthetic	AGCTACGCTCATTGTTTCGTAGCTACGATTAGCATCCCGTAGCTACGGGGTGGGGCCGCT
CATCCCACA	Sr-Of-Kr_synthetic	AGCTACGAAACAATGAGCGTAGCTACGGGATGCTAATCGTAGCTAGCGGCCCCACCCCGT
CATCCCATG	Kr-Ef-Of-Sr_synthetic	AGCTAGCGGCCCCACCCCGTAGCTACGTTCAAGGTCACGTAGCTACGGGATGCTAATCGTAGCTACGAAACAATGAGCGT
CATCCTGAC	Or-Kf-Sr-Ef_synthetic	AGCTACGATTAGCATCCCGTAGCTACGGGGTGGGGCCGCTAGCTACGAAACAATGAGCGTAGCTACGTTCAAGGTCACGT
CATCGACCT	Kf-Ef-Sr-Or_synthetic	AGCTACGGGGTGGGGCCGCTAGCTACGTTCAAGGTCACGTAGCTACGAAACAATGAGCGTAGCTACGATTAGCATCCCGT
CATCGACTC	Er-Sf-Kr-Of_synthetic	AGCTACGTGACCTTGAACGTAGCTACGCTCATTGTTTCGTAGCTAGCGGCCCCACCCCGTAGCTACGGGATGCTAATCGT
CATCGCAAT	Sr-Kr-Er_synthetic	AGCTACGAAACAATGAGCGTAGCTAGCGGCCCCACCCCGTAGCTACGTGACCTTGAACGT
CATCGCCGT	Er-Kf-Sr-Or_synthetic	AGCTACGTGACCTTGAACGTAGCTACGGGGTGGGGCCGCTAGCTACGAAACAATGAGCGTAGCTACGATTAGCATCCCGT
CATCGTGCA	Sr-Or_synthetic	AGCTACGAAACAATGAGCGTAGCTACGATTAGCATCCCGT
CATCTACAC	Or-Sr-Ef-Kf_synthetic	AGCTACGATTAGCATCCCGTAGCTACGAAACAATGAGCGTAGCTACGTTCAAGGTCACGTAGCTACGGGGTGGGGCCGCT
CATCTCAAA	KfOrSr_CMF-Scalar	AGCTACGGGGCGGGGCCGCTAGCTACGATTAGCATCCCGTAGCTACGAAACAATGAGCGT
CATCTCTTC	Sr-Kf_synthetic	AGCTACGAAACAATGAGCGTAGCTACGGGGTGGGGCCGCT
CATCTGAAC	Ef-Sr-Or-Kr_synthetic	AGCTACGTTCAAGGTCACGTAGCTACGAAACAATGAGCGTAGCTACGATTAGCATCCCGTAGCTAGCGGCCCCACCCCGT
CATCTGCTC	Er-Sr-Kf_synthetic	AGCTACGTGACCTTGAACGTAGCTACGAAACAATGAGCGTAGCTACGGGGTGGGGCCGCT
CATCTGTGG	Er-Or-Sf-Kr_synthetic	AGCTACGTGACCTTGAACGTAGCTACGATTAGCATCCCGTAGCTACGCTCATTGTTTCGTAGCTAGCGGCCCCACCCCGT
CATCTTCAA	Kf-Sf-Ef-Of_synthetic	AGCTACGGGGTGGGGCCGCTAGCTACGCTCATTGTTTCGTAGCTACGTTCAAGGTCACGTAGCTACGGGATGCTAATCGT
CATGAACGC	Kr-Ef-Sf-Or_synthetic	AGCTAGCGGCCCCACCCCGTAGCTACGTTCAAGGTCACGTAGCTACGCTCATTGTTTCGTAGCTACGATTAGCATCCCGT
CATGAAGAG	Kf-Of-Sr_synthetic	AGCTACGGGGTGGGGCCGCTAGCTACGGGATGCTAATCGTAGCTACGAAACAATGAGCGT
CATGAAGTT	KfKfErSr_CMF-Scalar	AGCTACGGGGCGGGGCCGCTAGCTACGGGGCGGGGCCGCTAGCTACGTGACCTTGAACGTAGCTACGAAACAATGAGCGT
CATGAGATA	Sf-Kr-Of-Ef_synthetic	AGCTACGCTCATTGTTTCGTAGCTAGCGGCCCCACCCCGTAGCTACGGGATGCTAATCGTAGCTACGTTCAAGGTCACGT
CATGAGCGA	Ef-Sf-Of_synthetic	AGCTACGTTCAAGGTCACGTAGCTACGCTCATTGTTTCGTAGCTACGGGATGCTAATCGT
CATGATAAC	Or-Sf-Er-Kf_synthetic	AGCTACGATTAGCATCCCGTAGCTACGCTCATTGTTTCGTAGCTACGTGACCTTGAACGTAGCTACGGGGTGGGGCCGCT
CATGATCCC	Ef-Of-Kf-Sr_synthetic	AGCTACGTTCAAGGTCACGTAGCTACGGGATGCTAATCGTAGCTACGGGGTGGGGCCGCTAGCTACGAAACAATGAGCGT
CATGATTGA	Kr-Or-Sf_synthetic	AGCTAGCGGCCCCACCCCGTAGCTACGATTAGCATCCCGTAGCTACGCTCATTGTTTCGT
CATGCAACG	Sr-Or-Kr_synthetic	AGCTACGAAACAATGAGCGTAGCTACGATTAGCATCCCGTAGCTAGCGGCCCCACCCCGT
CATGCAGTA	Kf-Of-Er-Sr_synthetic	AGCTACGGGGTGGGGCCGCTAGCTACGGGATGCTAATCGTAGCTACGTGACCTTGAACGTAGCTACGAAACAATGAGCGT
CATGCATAT	Kf-Er-Sr-Or_synthetic	AGCTACGGGGTGGGGCCGCTAGCTACGTGACCTTGAACGTAGCTACGAAACAATGAGCGTAGCTACGATTAGCATCCCGT
CATGCCAAA	Ef-Sf-Kf_synthetic	AGCTACGTTCAAGGTCACGTAGCTACGCTCATTGTTTCGTAGCTACGGGGTGGGGCCGCT
CATGCCACC	Ef-Or_synthetic	AGCTACGTTCAAGGTCACGTAGCTACGATTAGCATCCCGT
CATGCCTGC	Ef-Of-Sr-Kf_synthetic	AGCTACGTTCAAGGTCACGTAGCTACGGGATGCTAATCGTAGCTACGAAACAATGAGCGTAGCTACGGGGTGGGGCCGCT
CATGCTAGC	Of-Sf-Kr-Er_synthetic	AGCTACGGGATGCTAATCGTAGCTACGCTCATTGTTTCGTAGCTAGCGGCCCCACCCCGTAGCTACGTGACCTTGAACGT
CATGCTTAA	Kf-Sr_synthetic	AGCTACGGGGTGGGGCCGCTAGCTACGAAACAATGAGCGT
CATGGTGAC	Ef-Sr-Kr-Or_synthetic	AGCTACGTTCAAGGTCACGTAGCTACGAAACAATGAGCGTAGCTAGCGGCCCCACCCCGTAGCTACGATTAGCATCCCGT
CATGTAAAC	Sr-Kf-Of-Er_synthetic	AGCTACGAAACAATGAGCGTAGCTACGGGGTGGGGCCGCTAGCTACGGGATGCTAATCGTAGCTACGTGACCTTGAACGT
CATGTACCA	Sf-Or-Kr_synthetic	AGCTACGCTCATTGTTTCGTAGCTACGATTAGCATCCCGTAGCTAGCGGCCCCACCCCGT
CATGTAGTC	Ef-Sf-Of_synthetic	AGCTACGTTCAAGGTCACGTAGCTACGCTCATTGTTTCGTAGCTACGGGATGCTAATCGT
CATGTCTTG	Or-Sf-Kf_synthetic	AGCTACGATTAGCATCCCGTAGCTACGCTCATTGTTTCGTAGCTACGGGGTGGGGCCGCT
CATGTGAAT	Or-Sr-Er-Kr_synthetic	AGCTACGATTAGCATCCCGTAGCTACGAAACAATGAGCGTAGCTACGTGACCTTGAACGTAGCTAGCGGCCCCACCCCGT
CATGTTTGT	Sf-Or-Ef-Kr_synthetic	AGCTACGCTCATTGTTTCGTAGCTACGATTAGCATCCCGTAGCTACGTTCAAGGTCACGTAGCTAGCGGCCCCACCCCGT
CATTAAACC	Sf-Kr-Ef-Of_synthetic	AGCTACGCTCATTGTTTCGTAGCTAGCGGCCCCACCCCGTAGCTACGTTCAAGGTCACGTAGCTACGGGATGCTAATCGT
CATTAATGC	Er-Or-Sr-Kr_synthetic	AGCTACGTGACCTTGAACGTAGCTACGATTAGCATCCCGTAGCTACGAAACAATGAGCGTAGCTAGCGGCCCCACCCCGT
CATTACAAG	Ef-Kr-Sf-Of_synthetic	AGCTACGTTCAAGGTCACGTAGCTAGCGGCCCCACCCCGTAGCTACGCTCATTGTTTCGTAGCTACGGGATGCTAATCGT
CATTCATGA	Ef-Or-Sr-Kf_synthetic	AGCTACGTTCAAGGTCACGTAGCTACGATTAGCATCCCGTAGCTACGAAACAATGAGCGTAGCTACGGGGTGGGGCCGCT
CATTCCCTG	Of-Ef-Sf-Kr_synthetic	AGCTACGGGATGCTAATCGTAGCTACGTTCAAGGTCACGTAGCTACGCTCATTGTTTCGTAGCTAGCGGCCCCACCCCGT
CATTCGAGA	Ef-Kr-Or_synthetic	AGCTACGTTCAAGGTCACGTAGCTAGCGGCCCCACCCCGTAGCTACGATTAGCATCCCGT
CATTCGGAA	KfSrOfKr_CMF-Scalar	AGCTACGGGGCGGGGCCGCTAGCTACGAAACAATGAGCGTAGCTACGGGATGCTAATCGTAGCTAGCGGCCCCGCCCCGT
CATTGAGAA	Or-Kf-Sr-Ef_synthetic	AGCTACGATTAGCATCCCGTAGCTACGGGGTGGGGCCGCTAGCTACGAAACAATGAGCGTAGCTACGTTCAAGGTCACGT
CATTGCAGC	Ef-Kr-Of-Sr_synthetic	AGCTACGTTCAAGGTCACGTAGCTAGCGGCCCCACCCCGTAGCTACGGGATGCTAATCGTAGCTACGAAACAATGAGCGT
CATTGTCGG	Kf-Er-Of-Sr_synthetic	AGCTACGGGGTGGGGCCGCTAGCTACGTGACCTTGAACGTAGCTACGGGATGCTAATCGTAGCTACGAAACAATGAGCGT
CATTGTGGA	Of-Kr_synthetic	AGCTACGGGATGCTAATCGTAGCTAGCGGCCCCACCCCGT
CATTGTGTC	Ef-Kf-Sr-Or_synthetic	AGCTACGTTCAAGGTCACGTAGCTACGGGGTGGGGCCGCTAGCTACGAAACAATGAGCGTAGCTACGATTAGCATCCCGT
CATTTAGGT	Of-Sr-Ef-Kr_synthetic	AGCTACGGGATGCTAATCGTAGCTACGAAACAATGAGCGTAGCTACGTTCAAGGTCACGTAGCTAGCGGCCCCACCCCGT
CATTTCAGA	Or-Er-Sr_synthetic	AGCTACGATTAGCATCCCGTAGCTACGTGACCTTGAACGTAGCTACGAAACAATGAGCGT
CATTTGCCG	Ef-Or-Kr_synthetic	AGCTACGTTCAAGGTCACGTAGCTACGATTAGCATCCCGTAGCTAGCGGCCCCACCCCGT
CATTTGTGA	Kf-Sf-Ef_synthetic	AGCTACGGGGTGGGGCCGCTAGCTACGCTCATTGTTTCGTAGCTACGTTCAAGGTCACGT
CCAAACCGA	Sf-Ef_synthetic	AGCTACGCTCATTGTTTCGTAGCTACGTTCAAGGTCACGT
CCAAACGGT	Kr-Er-Or-Sr_synthetic	AGCTAGCGGCCCCACCCCGTAGCTACGTGACCTTGAACGTAGCTACGATTAGCATCCCGTAGCTACGAAACAATGAGCGT
CCAAATCGG	Ef-Of-Kr-Sf_synthetic	AGCTACGTTCAAGGTCACGTAGCTACGGGATGCTAATCGTAGCTAGCGGCCCCACCCCGTAGCTACGCTCATTGTTTCGT
CCAACAAGC	Sr-Er-Kf-Of_synthetic	AGCTACGAAACAATGAGCGTAGCTACGTGACCTTGAACGTAGCTACGGGGTGGGGCCGCTAGCTACGGGATGCTAATCGT
CCAACCAAC	Kr-Er-Or-Sr_synthetic	AGCTAGCGGCCCCACCCCGTAGCTACGTGACCTTGAACGTAGCTACGATTAGCATCCCGTAGCTACGAAACAATGAGCGT
CCAACCATG	Of-Er-Sf_synthetic	AGCTACGGGATGCTAATCGTAGCTACGTGACCTTGAACGTAGCTACGCTCATTGTTTCGT
CCAACGATA	Of-Sr-Kf_synthetic	AGCTACGGGATGCTAATCGTAGCTACGAAACAATGAGCGTAGCTACGGGGTGGGGCCGCT
CCAACGTCC	Sf-Kf_synthetic	AGCTACGCTCATTGTTTCGTAGCTACGGGGTGGGGCCGCT
CCAAGACAC	Basal
CCAAGACTG	Er-Kf-Of-Sf_synthetic	AGCTACGTGACCTTGAACGTAGCTACGGGGTGGGGCCGCTAGCTACGGGATGCTAATCGTAGCTACGCTCATTGTTTCGT
CCAAGAGCT	Er-Kr-Or-Sr_synthetic	AGCTACGTGACCTTGAACGTAGCTAGCGGCCCCACCCCGTAGCTACGATTAGCATCCCGTAGCTACGAAACAATGAGCGT
CCAAGAGTC	Or-Kr-Sr_synthetic	AGCTACGATTAGCATCCCGTAGCTAGCGGCCCCACCCCGTAGCTACGAAACAATGAGCGT
CCAAGATCA	Er-Or-Kf-Sf_synthetic	AGCTACGTGACCTTGAACGTAGCTACGATTAGCATCCCGTAGCTACGGGGTGGGGCCGCTAGCTACGCTCATTGTTTCGT
CCAAGCCAT	Kf-Er-Sr-Of_synthetic	AGCTACGGGGTGGGGCCGCTAGCTACGTGACCTTGAACGTAGCTACGAAACAATGAGCGTAGCTACGGGATGCTAATCGT
CCAAGCGCA	Of-Ef-Kf-Sf_synthetic	AGCTACGGGATGCTAATCGTAGCTACGTTCAAGGTCACGTAGCTACGGGGTGGGGCCGCTAGCTACGCTCATTGTTTCGT
CCAAGTGCC	KfEfSfEf_CMF-Scalar	AGCTACGGGGCGGGGCCGCTAGCTACGTTCAAGGTCACGTAGCTACGCTCATTGTTTCGTAGCTACGTTCAAGGTCACGT
CCAAGTTTA	Sr-Kf-Er-Of_synthetic	AGCTACGAAACAATGAGCGTAGCTACGGGGTGGGGCCGCTAGCTACGTGACCTTGAACGTAGCTACGGGATGCTAATCGT
CCAATAATG	Of-Er-Sf-Kr_synthetic	AGCTACGGGATGCTAATCGTAGCTACGTGACCTTGAACGTAGCTACGCTCATTGTTTCGTAGCTAGCGGCCCCACCCCGT
CCAATATGG	Ef-Or-Sf-Kf_synthetic	AGCTACGTTCAAGGTCACGTAGCTACGATTAGCATCCCGTAGCTACGCTCATTGTTTCGTAGCTACGGGGTGGGGCCGCT
CCAATCGCC	Ef-Kf-Or-Sr_synthetic	AGCTACGTTCAAGGTCACGTAGCTACGGGGTGGGGCCGCTAGCTACGATTAGCATCCCGTAGCTACGAAACAATGAGCGT
CCAATGACG	Basal
CCAATGCGG	Ef-Sf_synthetic	AGCTACGTTCAAGGTCACGTAGCTACGCTCATTGTTTCGT
CCAATGGAG	Er-Of-Kr-Sf_synthetic	AGCTACGTGACCTTGAACGTAGCTACGGGATGCTAATCGTAGCTAGCGGCCCCACCCCGTAGCTACGCTCATTGTTTCGT
CCAATGTCT	Kf-Er-Sr-Or_synthetic	AGCTACGGGGTGGGGCCGCTAGCTACGTGACCTTGAACGTAGCTACGAAACAATGAGCGTAGCTACGATTAGCATCCCGT
CCAATTGCT	Kr-Of-Sr-Ef_synthetic	AGCTAGCGGCCCCACCCCGTAGCTACGGGATGCTAATCGTAGCTACGAAACAATGAGCGTAGCTACGTTCAAGGTCACGT
CCAATTTGA	Sr-Er_synthetic	AGCTACGAAACAATGAGCGTAGCTACGTGACCTTGAACGT
CCACAGCTT	Kr-Er-Sr-Of_synthetic	AGCTAGCGGCCCCACCCCGTAGCTACGTGACCTTGAACGTAGCTACGAAACAATGAGCGTAGCTACGGGATGCTAATCGT
CCACATCAG	Kr-Ef-Of-Sr_synthetic	AGCTAGCGGCCCCACCCCGTAGCTACGTTCAAGGTCACGTAGCTACGGGATGCTAATCGTAGCTACGAAACAATGAGCGT
CCACCAGAT	Sf-Kf-Of-Ef_synthetic	AGCTACGCTCATTGTTTCGTAGCTACGGGGTGGGGCCGCTAGCTACGGGATGCTAATCGTAGCTACGTTCAAGGTCACGT
CCACCTAGT	Of-Sf-Er_synthetic	AGCTACGGGATGCTAATCGTAGCTACGCTCATTGTTTCGTAGCTACGTGACCTTGAACGT
CCACCTCAT	Sf-Er-Kf-Or_synthetic	AGCTACGCTCATTGTTTCGTAGCTACGTGACCTTGAACGTAGCTACGGGGTGGGGCCGCTAGCTACGATTAGCATCCCGT
CCACGAGGT	Or-Sr-Er-Kf_synthetic	AGCTACGATTAGCATCCCGTAGCTACGAAACAATGAGCGTAGCTACGTGACCTTGAACGTAGCTACGGGGTGGGGCCGCT
CCACGCTCT	Of-Sf-Kr-Ef_synthetic	AGCTACGGGATGCTAATCGTAGCTACGCTCATTGTTTCGTAGCTAGCGGCCCCACCCCGTAGCTACGTTCAAGGTCACGT
CCACGTCTG	Ef-Kf-Sr-Of_synthetic	AGCTACGTTCAAGGTCACGTAGCTACGGGGTGGGGCCGCTAGCTACGAAACAATGAGCGTAGCTACGGGATGCTAATCGT
CCACTAAAG	Ef-Sf-Of-Kf_synthetic	AGCTACGTTCAAGGTCACGTAGCTACGCTCATTGTTTCGTAGCTACGGGATGCTAATCGTAGCTACGGGGTGGGGCCGCT
CCACTCTGT	Er-Kr-Sr-Or_synthetic	AGCTACGTGACCTTGAACGTAGCTAGCGGCCCCACCCCGTAGCTACGAAACAATGAGCGTAGCTACGATTAGCATCCCGT
CCACTGATG	Kf-Or-Sf-Ef_synthetic	AGCTACGGGGTGGGGCCGCTAGCTACGATTAGCATCCCGTAGCTACGCTCATTGTTTCGTAGCTACGTTCAAGGTCACGT
CCACTGCCA	Kr-Er-Of-Sf_synthetic	AGCTAGCGGCCCCACCCCGTAGCTACGTGACCTTGAACGTAGCTACGGGATGCTAATCGTAGCTACGCTCATTGTTTCGT
CCACTTCGG	Sr-Ef-Of-Kf_synthetic	AGCTACGAAACAATGAGCGTAGCTACGTTCAAGGTCACGTAGCTACGGGATGCTAATCGTAGCTACGGGGTGGGGCCGCT
CCACTTTAC	Or-Sf_synthetic	AGCTACGATTAGCATCCCGTAGCTACGCTCATTGTTTCGT
CCAGAAAGT	Sr-Kr-Of_synthetic	AGCTACGAAACAATGAGCGTAGCTAGCGGCCCCACCCCGTAGCTACGGGATGCTAATCGT
CCAGAACTT	Or-Kr-Sf-Ef_synthetic	AGCTACGATTAGCATCCCGTAGCTAGCGGCCCCACCCCGTAGCTACGCTCATTGTTTCGTAGCTACGTTCAAGGTCACGT
CCAGAATCT	Ef-Kf_synthetic	AGCTACGTTCAAGGTCACGTAGCTACGGGGTGGGGCCGCT
CCAGACAAG	Or-Kr-Er-Sr_synthetic	AGCTACGATTAGCATCCCGTAGCTAGCGGCCCCACCCCGTAGCTACGTGACCTTGAACGTAGCTACGAAACAATGAGCGT
CCAGACACT	Ef-Kr-Or-Sr_synthetic	AGCTACGTTCAAGGTCACGTAGCTAGCGGCCCCACCCCGTAGCTACGATTAGCATCCCGTAGCTACGAAACAATGAGCGT
CCAGACGAA	Kf-Of-Sr-Ef_synthetic	AGCTACGGGGTGGGGCCGCTAGCTACGGGATGCTAATCGTAGCTACGAAACAATGAGCGTAGCTACGTTCAAGGTCACGT
CCAGAGAAT	Of-Er_synthetic	AGCTACGGGATGCTAATCGTAGCTACGTGACCTTGAACGT
CCAGAGCCT	Kf-Or-Sr_synthetic	AGCTACGGGGTGGGGCCGCTAGCTACGATTAGCATCCCGTAGCTACGAAACAATGAGCGT
CCAGATATG	Of-Er-Sr_synthetic	AGCTACGGGATGCTAATCGTAGCTACGTGACCTTGAACGTAGCTACGAAACAATGAGCGT
CCAGCACTG	Sf-Ef-Of-Kr_synthetic	AGCTACGCTCATTGTTTCGTAGCTACGTTCAAGGTCACGTAGCTACGGGATGCTAATCGTAGCTAGCGGCCCCACCCCGT
CCAGCAGTC	Ef-Or-Sr-Kr_synthetic	AGCTACGTTCAAGGTCACGTAGCTACGATTAGCATCCCGTAGCTACGAAACAATGAGCGTAGCTAGCGGCCCCACCCCGT
CCAGCCTCA	Kf-Of-Sf_synthetic	AGCTACGGGGTGGGGCCGCTAGCTACGGGATGCTAATCGTAGCTACGCTCATTGTTTCGT
CCAGCGCTT	Of-Sr-Kf_synthetic	AGCTACGGGATGCTAATCGTAGCTACGAAACAATGAGCGTAGCTACGGGGTGGGGCCGCT
CCAGCGTAC	Of-Kf-Sf_synthetic	AGCTACGGGATGCTAATCGTAGCTACGGGGTGGGGCCGCTAGCTACGCTCATTGTTTCGT
CCAGCGTTA	Sf-Ef-Kr_synthetic	AGCTACGCTCATTGTTTCGTAGCTACGTTCAAGGTCACGTAGCTAGCGGCCCCACCCCGT
CCAGCTATT	Sf-Er-Or-Kr_synthetic	AGCTACGCTCATTGTTTCGTAGCTACGTGACCTTGAACGTAGCTACGATTAGCATCCCGTAGCTAGCGGCCCCACCCCGT
CCAGGACTC	Ef-Kr-Sf-Or_synthetic	AGCTACGTTCAAGGTCACGTAGCTAGCGGCCCCACCCCGTAGCTACGCTCATTGTTTCGTAGCTACGATTAGCATCCCGT
CCAGGCAAC	Or-Ef-Kr_synthetic	AGCTACGATTAGCATCCCGTAGCTACGTTCAAGGTCACGTAGCTAGCGGCCCCACCCCGT
CCAGGCATA	Kf-Sr-Of-Ef_synthetic	AGCTACGGGGTGGGGCCGCTAGCTACGAAACAATGAGCGTAGCTACGGGATGCTAATCGTAGCTACGTTCAAGGTCACGT
CCAGGCTAT	Or-Kf-Ef-Sr_synthetic	AGCTACGATTAGCATCCCGTAGCTACGGGGTGGGGCCGCTAGCTACGTTCAAGGTCACGTAGCTACGAAACAATGAGCGT
CCAGGGACA	Of-Kr-Er-Sf_synthetic	AGCTACGGGATGCTAATCGTAGCTAGCGGCCCCACCCCGTAGCTACGTGACCTTGAACGTAGCTACGCTCATTGTTTCGT
CCAGTGACC	Kr-Or-Ef-Sf_synthetic	AGCTAGCGGCCCCACCCCGTAGCTACGATTAGCATCCCGTAGCTACGTTCAAGGTCACGTAGCTACGCTCATTGTTTCGT
CCAGTTATC	Kf-Er-Sf_synthetic	AGCTACGGGGTGGGGCCGCTAGCTACGTGACCTTGAACGTAGCTACGCTCATTGTTTCGT
CCATACAAT	Or-Er-Sr-Kf_synthetic	AGCTACGATTAGCATCCCGTAGCTACGTGACCTTGAACGTAGCTACGAAACAATGAGCGTAGCTACGGGGTGGGGCCGCT
CCATACCGC	Kf-Or-Sf-Er_synthetic	AGCTACGGGGTGGGGCCGCTAGCTACGATTAGCATCCCGTAGCTACGCTCATTGTTTCGTAGCTACGTGACCTTGAACGT
CCATACGGG	Of-Sr_synthetic	AGCTACGGGATGCTAATCGTAGCTACGAAACAATGAGCGT
CCATACGTA	Sr-Or-Er-Kr_synthetic	AGCTACGAAACAATGAGCGTAGCTACGATTAGCATCCCGTAGCTACGTGACCTTGAACGTAGCTAGCGGCCCCACCCCGT
CCATACTCC	Er-Sf-Kr-Or_synthetic	AGCTACGTGACCTTGAACGTAGCTACGCTCATTGTTTCGTAGCTAGCGGCCCCACCCCGTAGCTACGATTAGCATCCCGT
CCATATGTT	Ef-Or-Kf_synthetic	AGCTACGTTCAAGGTCACGTAGCTACGATTAGCATCCCGTAGCTACGGGGTGGGGCCGCT
CCATATTTG	Or-Er-Sr-Kf_synthetic	AGCTACGATTAGCATCCCGTAGCTACGTGACCTTGAACGTAGCTACGAAACAATGAGCGTAGCTACGGGGTGGGGCCGCT
CCATCAAGT	Of-Sf-Kr_synthetic	AGCTACGGGATGCTAATCGTAGCTACGCTCATTGTTTCGTAGCTAGCGGCCCCACCCCGT
CCATCATCT	Or-Kr-Ef_synthetic	AGCTACGATTAGCATCCCGTAGCTAGCGGCCCCACCCCGTAGCTACGTTCAAGGTCACGT
CCATCCGTT	Of-Ef-Sr_synthetic	AGCTACGGGATGCTAATCGTAGCTACGTTCAAGGTCACGTAGCTACGAAACAATGAGCGT
CCATCCTTA	Of-Sr-Kr-Ef_synthetic	AGCTACGGGATGCTAATCGTAGCTACGAAACAATGAGCGTAGCTAGCGGCCCCACCCCGTAGCTACGTTCAAGGTCACGT
CCATCGGTC	Ef-Or-Sf_synthetic	AGCTACGTTCAAGGTCACGTAGCTACGATTAGCATCCCGTAGCTACGCTCATTGTTTCGT
CCATGAATC	Kr-Sf-Or-Er_synthetic	AGCTAGCGGCCCCACCCCGTAGCTACGCTCATTGTTTCGTAGCTACGATTAGCATCCCGTAGCTACGTGACCTTGAACGT
CCATGCTGA	Or-Sf-Kf-Er_synthetic	AGCTACGATTAGCATCCCGTAGCTACGCTCATTGTTTCGTAGCTACGGGGTGGGGCCGCTAGCTACGTGACCTTGAACGT
CCATGGACC	Kr-Ef-Sr-Or_synthetic	AGCTAGCGGCCCCACCCCGTAGCTACGTTCAAGGTCACGTAGCTACGAAACAATGAGCGTAGCTACGATTAGCATCCCGT
CCATGGATG	Er-Of-Kr_synthetic	AGCTACGTGACCTTGAACGTAGCTACGGGATGCTAATCGTAGCTAGCGGCCCCACCCCGT
CCATGTGAT	Sr-Or-Kf-Ef_synthetic	AGCTACGAAACAATGAGCGTAGCTACGATTAGCATCCCGTAGCTACGGGGTGGGGCCGCTAGCTACGTTCAAGGTCACGT
CCATGTGCA	Kr-Or-Ef-Sr_synthetic	AGCTAGCGGCCCCACCCCGTAGCTACGATTAGCATCCCGTAGCTACGTTCAAGGTCACGTAGCTACGAAACAATGAGCGT
CCATTACTC	Of-Er-Sf-Kr_synthetic	AGCTACGGGATGCTAATCGTAGCTACGTGACCTTGAACGTAGCTACGCTCATTGTTTCGTAGCTAGCGGCCCCACCCCGT
CCATTCATT	Kf-Sf-Or-Ef_synthetic	AGCTACGGGGTGGGGCCGCTAGCTACGCTCATTGTTTCGTAGCTACGATTAGCATCCCGTAGCTACGTTCAAGGTCACGT
CCATTCTGG	Of-Sf-Er_synthetic	AGCTACGGGATGCTAATCGTAGCTACGCTCATTGTTTCGTAGCTACGTGACCTTGAACGT
CCATTGCAC	Or-Sr-Kr_synthetic	AGCTACGATTAGCATCCCGTAGCTACGAAACAATGAGCGTAGCTAGCGGCCCCACCCCGT
CCATTTGCC	Ef-Sr-Or_synthetic	AGCTACGTTCAAGGTCACGTAGCTACGAAACAATGAGCGTAGCTACGATTAGCATCCCGT
CCGAAACCT	Of-Sf-Kr-Ef_synthetic	AGCTACGGGATGCTAATCGTAGCTACGCTCATTGTTTCGTAGCTAGCGGCCCCACCCCGTAGCTACGTTCAAGGTCACGT
CCGAAACTA	Ef-Sr-Of_synthetic	AGCTACGTTCAAGGTCACGTAGCTACGAAACAATGAGCGTAGCTACGGGATGCTAATCGT
CCGAAAGAA	Er-Sr-Kr-Or_synthetic	AGCTACGTGACCTTGAACGTAGCTACGAAACAATGAGCGTAGCTAGCGGCCCCACCCCGTAGCTACGATTAGCATCCCGT
CCGAAAGTG	Sf-Kr-Ef-Of_synthetic	AGCTACGCTCATTGTTTCGTAGCTAGCGGCCCCACCCCGTAGCTACGTTCAAGGTCACGTAGCTACGGGATGCTAATCGT
CCGAAATCA	Kr-Sf-Ef_synthetic	AGCTAGCGGCCCCACCCCGTAGCTACGCTCATTGTTTCGTAGCTACGTTCAAGGTCACGT
CCGAACTGA	Kr-Sf-Of-Ef_synthetic	AGCTAGCGGCCCCACCCCGTAGCTACGCTCATTGTTTCGTAGCTACGGGATGCTAATCGTAGCTACGTTCAAGGTCACGT
CCGAAGTGC	Ef-Of-Kf-Sr_synthetic	AGCTACGTTCAAGGTCACGTAGCTACGGGATGCTAATCGTAGCTACGGGGTGGGGCCGCTAGCTACGAAACAATGAGCGT
CCGAATATC	Kr-Or-Ef_synthetic	AGCTAGCGGCCCCACCCCGTAGCTACGATTAGCATCCCGTAGCTACGTTCAAGGTCACGT
CCGAATGGT	Kr-Of-Sf-Ef_synthetic	AGCTAGCGGCCCCACCCCGTAGCTACGGGATGCTAATCGTAGCTACGCTCATTGTTTCGTAGCTACGTTCAAGGTCACGT
CCGAATTAA	Kr-Of-Sf-Ef_synthetic	AGCTAGCGGCCCCACCCCGTAGCTACGGGATGCTAATCGTAGCTACGCTCATTGTTTCGTAGCTACGTTCAAGGTCACGT
CCGACAGAC	Ef-Sf-Kf-Of_synthetic	AGCTACGTTCAAGGTCACGTAGCTACGCTCATTGTTTCGTAGCTACGGGGTGGGGCCGCTAGCTACGGGATGCTAATCGT
CCGACCAGA	Er-Sf-Kr-Or_synthetic	AGCTACGTGACCTTGAACGTAGCTACGCTCATTGTTTCGTAGCTAGCGGCCCCACCCCGTAGCTACGATTAGCATCCCGT
CCGACTACT	Sr-Er-Or-Kr_synthetic	AGCTACGAAACAATGAGCGTAGCTACGTGACCTTGAACGTAGCTACGATTAGCATCCCGTAGCTAGCGGCCCCACCCCGT
CCGACTGAT	Sr-Kr-Of_synthetic	AGCTACGAAACAATGAGCGTAGCTAGCGGCCCCACCCCGTAGCTACGGGATGCTAATCGT
CCGACTTAC	Sf-Or-Ef-Kr_synthetic	AGCTACGCTCATTGTTTCGTAGCTACGATTAGCATCCCGTAGCTACGTTCAAGGTCACGTAGCTAGCGGCCCCACCCCGT
CCGAGCATA	Sr-Er-Of-Kr_synthetic	AGCTACGAAACAATGAGCGTAGCTACGTGACCTTGAACGTAGCTACGGGATGCTAATCGTAGCTAGCGGCCCCACCCCGT
CCGAGCTGT	Sr-Ef-Or_synthetic	AGCTACGAAACAATGAGCGTAGCTACGTTCAAGGTCACGTAGCTACGATTAGCATCCCGT
CCGATCGAC	Or-Kr-Sf_synthetic	AGCTACGATTAGCATCCCGTAGCTAGCGGCCCCACCCCGTAGCTACGCTCATTGTTTCGT
CCGATGCGT	Or-Kf-Sf-Er_synthetic	AGCTACGATTAGCATCCCGTAGCTACGGGGTGGGGCCGCTAGCTACGCTCATTGTTTCGTAGCTACGTGACCTTGAACGT
CCGATTGGG	Er-Sr-Kr-Or_synthetic	AGCTACGTGACCTTGAACGTAGCTACGAAACAATGAGCGTAGCTAGCGGCCCCACCCCGTAGCTACGATTAGCATCCCGT
CCGATTTCT	Kr-Sr_synthetic	AGCTAGCGGCCCCACCCCGTAGCTACGAAACAATGAGCGT
CCGCAATCT	Sf-Er-Of-Kr_synthetic	AGCTACGCTCATTGTTTCGTAGCTACGTGACCTTGAACGTAGCTACGGGATGCTAATCGTAGCTAGCGGCCCCACCCCGT
CCGCAATTC	Sr-Er-Kf-Or_synthetic	AGCTACGAAACAATGAGCGTAGCTACGTGACCTTGAACGTAGCTACGGGGTGGGGCCGCTAGCTACGATTAGCATCCCGT
CCGCAGAAC	Or-Sr_synthetic	AGCTACGATTAGCATCCCGTAGCTACGAAACAATGAGCGT
CCGCATTGT	Of-Ef-Sr_synthetic	AGCTACGGGATGCTAATCGTAGCTACGTTCAAGGTCACGTAGCTACGAAACAATGAGCGT
CCGCCAACT	Of-Sf-Er_synthetic	AGCTACGGGATGCTAATCGTAGCTACGCTCATTGTTTCGTAGCTACGTGACCTTGAACGT
CCGCCACTA	Of-Er_synthetic	AGCTACGGGATGCTAATCGTAGCTACGTGACCTTGAACGT
CCGCCATTG	Kr-Sr-Ef_synthetic	AGCTAGCGGCCCCACCCCGTAGCTACGAAACAATGAGCGTAGCTACGTTCAAGGTCACGT
CCGCCGAAT	KfSfKfEr_CMF-Scalar	AGCTACGGGGCGGGGCCGCTAGCTACGCTCATTGTTTCGTAGCTACGGGGCGGGGCCGCTAGCTACGTGACCTTGAACGT
CCGCCTATA	Sr-Kr-Or-Er_synthetic	AGCTACGAAACAATGAGCGTAGCTAGCGGCCCCACCCCGTAGCTACGATTAGCATCCCGTAGCTACGTGACCTTGAACGT
CCGCGAAGA	Or-Ef_synthetic	AGCTACGATTAGCATCCCGTAGCTACGTTCAAGGTCACGT
CCGCGATGT	Kr-Or-Sf_synthetic	AGCTAGCGGCCCCACCCCGTAGCTACGATTAGCATCCCGTAGCTACGCTCATTGTTTCGT
CCGCGTAAG	Basal
CCGCTATGC	SrKfSrKr_CMF-Scalar	AGCTACGAAACAATGAGCGTAGCTACGGGGCGGGGCCGCTAGCTACGAAACAATGAGCGTAGCTAGCGGCCCCGCCCCGT
CCGCTGAAA	Sr-Ef-Kr-Of_synthetic	AGCTACGAAACAATGAGCGTAGCTACGTTCAAGGTCACGTAGCTAGCGGCCCCACCCCGTAGCTACGGGATGCTAATCGT
CCGCTGTCT	Er-Kf-Sf-Or_synthetic	AGCTACGTGACCTTGAACGTAGCTACGGGGTGGGGCCGCTAGCTACGCTCATTGTTTCGTAGCTACGATTAGCATCCCGT
CCGCTTCGT	Er-Sf-Or-Kf_synthetic	AGCTACGTGACCTTGAACGTAGCTACGCTCATTGTTTCGTAGCTACGATTAGCATCCCGTAGCTACGGGGTGGGGCCGCT
CCGCTTGAG	Or-Sr-Er-Kr_synthetic	AGCTACGATTAGCATCCCGTAGCTACGAAACAATGAGCGTAGCTACGTGACCTTGAACGTAGCTAGCGGCCCCACCCCGT
CCGGAAGAC	Or-Ef-Kf_synthetic	AGCTACGATTAGCATCCCGTAGCTACGTTCAAGGTCACGTAGCTACGGGGTGGGGCCGCT
CCGGAATAG	Ef-Or-Sr-Kr_synthetic	AGCTACGTTCAAGGTCACGTAGCTACGATTAGCATCCCGTAGCTACGAAACAATGAGCGTAGCTAGCGGCCCCACCCCGT
CCGGCCTAA	Kr-Ef-Or_synthetic	AGCTAGCGGCCCCACCCCGTAGCTACGTTCAAGGTCACGTAGCTACGATTAGCATCCCGT
CCGGGAGAT	Basal
CCGGGATCT	Er-Sr-Kf_synthetic	AGCTACGTGACCTTGAACGTAGCTACGAAACAATGAGCGTAGCTACGGGGTGGGGCCGCT
CCGGTCTGA	Kr-Of-Ef-Sr_synthetic	AGCTAGCGGCCCCACCCCGTAGCTACGGGATGCTAATCGTAGCTACGTTCAAGGTCACGTAGCTACGAAACAATGAGCGT
CCGGTGAAG	Sr-Kf-Ef_synthetic	AGCTACGAAACAATGAGCGTAGCTACGGGGTGGGGCCGCTAGCTACGTTCAAGGTCACGT
CCGGTGATA	Ef-Sf-Or-Kf_synthetic	AGCTACGTTCAAGGTCACGTAGCTACGCTCATTGTTTCGTAGCTACGATTAGCATCCCGTAGCTACGGGGTGGGGCCGCT
CCGGTTAAT	Kr-Sf-Of-Ef_synthetic	AGCTAGCGGCCCCACCCCGTAGCTACGCTCATTGTTTCGTAGCTACGGGATGCTAATCGTAGCTACGTTCAAGGTCACGT
CCGGTTCCA	Sf-Of-Ef-Kr_synthetic	AGCTACGCTCATTGTTTCGTAGCTACGGGATGCTAATCGTAGCTACGTTCAAGGTCACGTAGCTAGCGGCCCCACCCCGT
CCGGTTCTC	KfOrSr_CMF-Scalar	AGCTACGGGGCGGGGCCGCTAGCTACGATTAGCATCCCGTAGCTACGAAACAATGAGCGT
CCGTAGCTC	Ef-Sr-Kr-Or_synthetic	AGCTACGTTCAAGGTCACGTAGCTACGAAACAATGAGCGTAGCTAGCGGCCCCACCCCGTAGCTACGATTAGCATCCCGT
CCGTATCCC	Sf-Er-Of-Kr_synthetic	AGCTACGCTCATTGTTTCGTAGCTACGTGACCTTGAACGTAGCTACGGGATGCTAATCGTAGCTAGCGGCCCCACCCCGT
CCGTATTAT	Of-Kf-Sf-Er_synthetic	AGCTACGGGATGCTAATCGTAGCTACGGGGTGGGGCCGCTAGCTACGCTCATTGTTTCGTAGCTACGTGACCTTGAACGT
CCGTATTCG	Or-Kf_synthetic	AGCTACGATTAGCATCCCGTAGCTACGGGGTGGGGCCGCT
CCGTATTTA	Er-Kf-Or_synthetic	AGCTACGTGACCTTGAACGTAGCTACGGGGTGGGGCCGCTAGCTACGATTAGCATCCCGT
CCGTCATCG	Sf-Or-Er-Kf_synthetic	AGCTACGCTCATTGTTTCGTAGCTACGATTAGCATCCCGTAGCTACGTGACCTTGAACGTAGCTACGGGGTGGGGCCGCT
CCGTCGTTA	Or-Er-Kr-Sr_synthetic	AGCTACGATTAGCATCCCGTAGCTACGTGACCTTGAACGTAGCTAGCGGCCCCACCCCGTAGCTACGAAACAATGAGCGT
CCGTGACCA	Of-Ef-Kr-Sr_synthetic	AGCTACGGGATGCTAATCGTAGCTACGTTCAAGGTCACGTAGCTAGCGGCCCCACCCCGTAGCTACGAAACAATGAGCGT
CCGTGATAT	Er-Sr_synthetic	AGCTACGTGACCTTGAACGTAGCTACGAAACAATGAGCGT
CCGTGCTTC	Sf-Kf-Of-Er_synthetic	AGCTACGCTCATTGTTTCGTAGCTACGGGGTGGGGCCGCTAGCTACGGGATGCTAATCGTAGCTACGTGACCTTGAACGT
CCGTGGTAA	Ef-Kr-Or_synthetic	AGCTACGTTCAAGGTCACGTAGCTAGCGGCCCCACCCCGTAGCTACGATTAGCATCCCGT
CCGTGTAGT	Sf-Or-Ef-Kf_synthetic	AGCTACGCTCATTGTTTCGTAGCTACGATTAGCATCCCGTAGCTACGTTCAAGGTCACGTAGCTACGGGGTGGGGCCGCT
CCGTGTCAT	Sf-Kf-Of-Er_synthetic	AGCTACGCTCATTGTTTCGTAGCTACGGGGTGGGGCCGCTAGCTACGGGATGCTAATCGTAGCTACGTGACCTTGAACGT
CCGTGTTGC	Er-Kr-Or-Sf_synthetic	AGCTACGTGACCTTGAACGTAGCTAGCGGCCCCACCCCGTAGCTACGATTAGCATCCCGTAGCTACGCTCATTGTTTCGT
CCGTTACAT	Or-Kr-Er-Sr_synthetic	AGCTACGATTAGCATCCCGTAGCTAGCGGCCCCACCCCGTAGCTACGTGACCTTGAACGTAGCTACGAAACAATGAGCGT
CCGTTACCG	Of-Sf-Kr_synthetic	AGCTACGGGATGCTAATCGTAGCTACGCTCATTGTTTCGTAGCTAGCGGCCCCACCCCGT
CCGTTCGAG	Sr-Of-Kf-Ef_synthetic	AGCTACGAAACAATGAGCGTAGCTACGGGATGCTAATCGTAGCTACGGGGTGGGGCCGCTAGCTACGTTCAAGGTCACGT
CCGTTCTGC	Or-Kr_synthetic	AGCTACGATTAGCATCCCGTAGCTAGCGGCCCCACCCCGT
CCGTTGGCA	Ef-Of-Sf-Kf_synthetic	AGCTACGTTCAAGGTCACGTAGCTACGGGATGCTAATCGTAGCTACGCTCATTGTTTCGTAGCTACGGGGTGGGGCCGCT
CCGTTTGCG	Of-Sr-Ef-Kf_synthetic	AGCTACGGGATGCTAATCGTAGCTACGAAACAATGAGCGTAGCTACGTTCAAGGTCACGTAGCTACGGGGTGGGGCCGCT
CCTAAACAC	Er-Or-Sf-Kr_synthetic	AGCTACGTGACCTTGAACGTAGCTACGATTAGCATCCCGTAGCTACGCTCATTGTTTCGTAGCTAGCGGCCCCACCCCGT
CCTAAGATT	Sr-Of-Ef-Kr_synthetic	AGCTACGAAACAATGAGCGTAGCTACGGGATGCTAATCGTAGCTACGTTCAAGGTCACGTAGCTAGCGGCCCCACCCCGT
CCTAAGTAT	Kf-Of-Sf-Ef_synthetic	AGCTACGGGGTGGGGCCGCTAGCTACGGGATGCTAATCGTAGCTACGCTCATTGTTTCGTAGCTACGTTCAAGGTCACGT
CCTAATCTT	Er-Kf-Or_synthetic	AGCTACGTGACCTTGAACGTAGCTACGGGGTGGGGCCGCTAGCTACGATTAGCATCCCGT
CCTAATGTC	Er-Kf-Sr_synthetic	AGCTACGTGACCTTGAACGTAGCTACGGGGTGGGGCCGCTAGCTACGAAACAATGAGCGT
CCTACAACA	Kr-Sf-Er-Of_synthetic	AGCTAGCGGCCCCACCCCGTAGCTACGCTCATTGTTTCGTAGCTACGTGACCTTGAACGTAGCTACGGGATGCTAATCGT
CCTACACTG	Er-Kf-Sr-Of_synthetic	AGCTACGTGACCTTGAACGTAGCTACGGGGTGGGGCCGCTAGCTACGAAACAATGAGCGTAGCTACGGGATGCTAATCGT
CCTACAGCC	Kr-Or-Sr-Er_synthetic	AGCTAGCGGCCCCACCCCGTAGCTACGATTAGCATCCCGTAGCTACGAAACAATGAGCGTAGCTACGTGACCTTGAACGT
CCTACAGTA	Er-Of-Sf-Kr_synthetic	AGCTACGTGACCTTGAACGTAGCTACGGGATGCTAATCGTAGCTACGCTCATTGTTTCGTAGCTAGCGGCCCCACCCCGT
CCTACCACT	Er-Kr-Sf-Or_synthetic	AGCTACGTGACCTTGAACGTAGCTAGCGGCCCCACCCCGTAGCTACGCTCATTGTTTCGTAGCTACGATTAGCATCCCGT
CCTACGATC	Basal
CCTACTGCG	Sr-Or-Kr-Er_synthetic	AGCTACGAAACAATGAGCGTAGCTACGATTAGCATCCCGTAGCTAGCGGCCCCACCCCGTAGCTACGTGACCTTGAACGT
CCTACTTCC	Sr-Kf-Of_synthetic	AGCTACGAAACAATGAGCGTAGCTACGGGGTGGGGCCGCTAGCTACGGGATGCTAATCGT
CCTACTTTA	Sf-Of-Kr_synthetic	AGCTACGCTCATTGTTTCGTAGCTACGGGATGCTAATCGTAGCTAGCGGCCCCACCCCGT
CCTAGAAGA	Or-Kf-Sf-Er_synthetic	AGCTACGATTAGCATCCCGTAGCTACGGGGTGGGGCCGCTAGCTACGCTCATTGTTTCGTAGCTACGTGACCTTGAACGT
CCTAGACAG	Er-Kf-Sf-Of_synthetic	AGCTACGTGACCTTGAACGTAGCTACGGGGTGGGGCCGCTAGCTACGCTCATTGTTTCGTAGCTACGGGATGCTAATCGT
CCTAGCCTC	Kf-Or-Sf_synthetic	AGCTACGGGGTGGGGCCGCTAGCTACGATTAGCATCCCGTAGCTACGCTCATTGTTTCGT
CCTAGCTCT	Kr-Sf-Ef-Of_synthetic	AGCTAGCGGCCCCACCCCGTAGCTACGCTCATTGTTTCGTAGCTACGTTCAAGGTCACGTAGCTACGGGATGCTAATCGT
CCTAGTGGT	Sf-Of-Er_synthetic	AGCTACGCTCATTGTTTCGTAGCTACGGGATGCTAATCGTAGCTACGTGACCTTGAACGT
CCTAGTTTG	Sr-Kr-Er-Of_synthetic	AGCTACGAAACAATGAGCGTAGCTAGCGGCCCCACCCCGTAGCTACGTGACCTTGAACGTAGCTACGGGATGCTAATCGT
CCTATAAGT	Sf-Kr-Of-Er_synthetic	AGCTACGCTCATTGTTTCGTAGCTAGCGGCCCCACCCCGTAGCTACGGGATGCTAATCGTAGCTACGTGACCTTGAACGT
CCTATATTC	Ef-Kf-Or_synthetic	AGCTACGTTCAAGGTCACGTAGCTACGGGGTGGGGCCGCTAGCTACGATTAGCATCCCGT
CCTATCCGC	Kr-Er-Of_synthetic	AGCTAGCGGCCCCACCCCGTAGCTACGTGACCTTGAACGTAGCTACGGGATGCTAATCGT
CCTATGATA	Sf-Or-Er-Kr_synthetic	AGCTACGCTCATTGTTTCGTAGCTACGATTAGCATCCCGTAGCTACGTGACCTTGAACGTAGCTAGCGGCCCCACCCCGT
CCTATGTGT	Or-Sf-Er-Kr_synthetic	AGCTACGATTAGCATCCCGTAGCTACGCTCATTGTTTCGTAGCTACGTGACCTTGAACGTAGCTAGCGGCCCCACCCCGT
CCTATTAAG	Kf-Or-Sr-Ef_synthetic	AGCTACGGGGTGGGGCCGCTAGCTACGATTAGCATCCCGTAGCTACGAAACAATGAGCGTAGCTACGTTCAAGGTCACGT
CCTATTATC	Ef-Or-Sf-Kf_synthetic	AGCTACGTTCAAGGTCACGTAGCTACGATTAGCATCCCGTAGCTACGCTCATTGTTTCGTAGCTACGGGGTGGGGCCGCT
CCTCAAAGA	Sr-Kr-Or-Er_synthetic	AGCTACGAAACAATGAGCGTAGCTAGCGGCCCCACCCCGTAGCTACGATTAGCATCCCGTAGCTACGTGACCTTGAACGT
CCTCATGAA	Sr-Ef-Kr-Or_synthetic	AGCTACGAAACAATGAGCGTAGCTACGTTCAAGGTCACGTAGCTAGCGGCCCCACCCCGTAGCTACGATTAGCATCCCGT
CCTCCCATA	Ef-Of-Sr-Kr_synthetic	AGCTACGTTCAAGGTCACGTAGCTACGGGATGCTAATCGTAGCTACGAAACAATGAGCGTAGCTAGCGGCCCCACCCCGT
CCTCCGGTT	Kf-Ef-Sr-Or_synthetic	AGCTACGGGGTGGGGCCGCTAGCTACGTTCAAGGTCACGTAGCTACGAAACAATGAGCGTAGCTACGATTAGCATCCCGT
CCTCCTGAT	Kr-Sr-Ef-Or_synthetic	AGCTAGCGGCCCCACCCCGTAGCTACGAAACAATGAGCGTAGCTACGTTCAAGGTCACGTAGCTACGATTAGCATCCCGT
CCTCGAAAG	Of-Kf-Sr-Er_synthetic	AGCTACGGGATGCTAATCGTAGCTACGGGGTGGGGCCGCTAGCTACGAAACAATGAGCGTAGCTACGTGACCTTGAACGT
CCTCGCGAT	Er-Sr-Kf_synthetic	AGCTACGTGACCTTGAACGTAGCTACGAAACAATGAGCGTAGCTACGGGGTGGGGCCGCT
CCTCGCTGT	Of-Kr-Er-Sr_synthetic	AGCTACGGGATGCTAATCGTAGCTAGCGGCCCCACCCCGTAGCTACGTGACCTTGAACGTAGCTACGAAACAATGAGCGT
CCTCGTAGC	Sf-Er-Kr-Or_synthetic	AGCTACGCTCATTGTTTCGTAGCTACGTGACCTTGAACGTAGCTAGCGGCCCCACCCCGTAGCTACGATTAGCATCCCGT
CCTCGTTAT	Kr-Of-Sr-Er_synthetic	AGCTAGCGGCCCCACCCCGTAGCTACGGGATGCTAATCGTAGCTACGAAACAATGAGCGTAGCTACGTGACCTTGAACGT
CCTCTAAAT	Of-Sr-Kr-Er_synthetic	AGCTACGGGATGCTAATCGTAGCTACGAAACAATGAGCGTAGCTAGCGGCCCCACCCCGTAGCTACGTGACCTTGAACGT
CCTCTACCT	Basal
CCTCTATGA	Or-Kf-Er-Sf_synthetic	AGCTACGATTAGCATCCCGTAGCTACGGGGTGGGGCCGCTAGCTACGTGACCTTGAACGTAGCTACGCTCATTGTTTCGT
CCTCTCCTA	Kf-Ef_synthetic	AGCTACGGGGTGGGGCCGCTAGCTACGTTCAAGGTCACGT
CCTCTCGTT	Kr-Ef-Sr-Of_synthetic	AGCTAGCGGCCCCACCCCGTAGCTACGTTCAAGGTCACGTAGCTACGAAACAATGAGCGTAGCTACGGGATGCTAATCGT
CCTCTGCAC	Sf-Ef-Of-Kr_synthetic	AGCTACGCTCATTGTTTCGTAGCTACGTTCAAGGTCACGTAGCTACGGGATGCTAATCGTAGCTAGCGGCCCCACCCCGT
CCTCTGCTG	Or-Sf-Er-Kf_synthetic	AGCTACGATTAGCATCCCGTAGCTACGCTCATTGTTTCGTAGCTACGTGACCTTGAACGTAGCTACGGGGTGGGGCCGCT
CCTCTTCTT	Sr-Kf-Of-Ef_synthetic	AGCTACGAAACAATGAGCGTAGCTACGGGGTGGGGCCGCTAGCTACGGGATGCTAATCGTAGCTACGTTCAAGGTCACGT
CCTCTTGTG	Sr-Of-Kf_synthetic	AGCTACGAAACAATGAGCGTAGCTACGGGATGCTAATCGTAGCTACGGGGTGGGGCCGCT
CCTGAAAGC	Sf-Kr-Or_synthetic	AGCTACGCTCATTGTTTCGTAGCTAGCGGCCCCACCCCGTAGCTACGATTAGCATCCCGT
CCTGAAGTG	Or-Ef-Kr-Sf_synthetic	AGCTACGATTAGCATCCCGTAGCTACGTTCAAGGTCACGTAGCTAGCGGCCCCACCCCGTAGCTACGCTCATTGTTTCGT
CCTGACCAG	Kr-Er_synthetic	AGCTAGCGGCCCCACCCCGTAGCTACGTGACCTTGAACGT
CCTGATGCA	Sr-Of-Ef-Kr_synthetic	AGCTACGAAACAATGAGCGTAGCTACGGGATGCTAATCGTAGCTACGTTCAAGGTCACGTAGCTAGCGGCCCCACCCCGT
CCTGCAACT	Of-Kf-Sf_synthetic	AGCTACGGGATGCTAATCGTAGCTACGGGGTGGGGCCGCTAGCTACGCTCATTGTTTCGT
CCTGCACAC	Er-Kf-Sr-Of_synthetic	AGCTACGTGACCTTGAACGTAGCTACGGGGTGGGGCCGCTAGCTACGAAACAATGAGCGTAGCTACGGGATGCTAATCGT
CCTGCCAAT	Sr-Kr-Of-Er_synthetic	AGCTACGAAACAATGAGCGTAGCTAGCGGCCCCACCCCGTAGCTACGGGATGCTAATCGTAGCTACGTGACCTTGAACGT
CCTGCCTTA	Er-Kf_synthetic	AGCTACGTGACCTTGAACGTAGCTACGGGGTGGGGCCGCT
CCTGCGAGA	Of-Kr-Sf-Ef_synthetic	AGCTACGGGATGCTAATCGTAGCTAGCGGCCCCACCCCGTAGCTACGCTCATTGTTTCGTAGCTACGTTCAAGGTCACGT
CCTGCGCAA	Ef-Sr-Of-Kf_synthetic	AGCTACGTTCAAGGTCACGTAGCTACGAAACAATGAGCGTAGCTACGGGATGCTAATCGTAGCTACGGGGTGGGGCCGCT
CCTGCTTGA	Of-Kr-Sr-Ef_synthetic	AGCTACGGGATGCTAATCGTAGCTAGCGGCCCCACCCCGTAGCTACGAAACAATGAGCGTAGCTACGTTCAAGGTCACGT
CCTGGAACC	Of-Ef-Kf-Sr_synthetic	AGCTACGGGATGCTAATCGTAGCTACGTTCAAGGTCACGTAGCTACGGGGTGGGGCCGCTAGCTACGAAACAATGAGCGT
CCTGGACGT	Er-Of-Sf_synthetic	AGCTACGTGACCTTGAACGTAGCTACGGGATGCTAATCGTAGCTACGCTCATTGTTTCGT
CCTGGTACA	Kr-Of_synthetic	AGCTAGCGGCCCCACCCCGTAGCTACGGGATGCTAATCGT
CCTGGTTTC	Ef-Sr-Kf-Or_synthetic	AGCTACGTTCAAGGTCACGTAGCTACGAAACAATGAGCGTAGCTACGGGGTGGGGCCGCTAGCTACGATTAGCATCCCGT
CCTGTAATC	Sf-Er-Or-Kr_synthetic	AGCTACGCTCATTGTTTCGTAGCTACGTGACCTTGAACGTAGCTACGATTAGCATCCCGTAGCTAGCGGCCCCACCCCGT
CCTGTACTT	Er-Kr-Of-Sf_synthetic	AGCTACGTGACCTTGAACGTAGCTAGCGGCCCCACCCCGTAGCTACGGGATGCTAATCGTAGCTACGCTCATTGTTTCGT
CCTGTCCGT	Or-Er-Sf_synthetic	AGCTACGATTAGCATCCCGTAGCTACGTGACCTTGAACGTAGCTACGCTCATTGTTTCGT
CCTGTCGAG	Or-Kf-Ef-Sr_synthetic	AGCTACGATTAGCATCCCGTAGCTACGGGGTGGGGCCGCTAGCTACGTTCAAGGTCACGTAGCTACGAAACAATGAGCGT
CCTGTGAGT	Sr-Er-Or_synthetic	AGCTACGAAACAATGAGCGTAGCTACGTGACCTTGAACGTAGCTACGATTAGCATCCCGT
CCTGTTCTA	Sf-Of_synthetic	AGCTACGCTCATTGTTTCGTAGCTACGGGATGCTAATCGT
CCTGTTGGT	Or-Sr-Er_synthetic	AGCTACGATTAGCATCCCGTAGCTACGAAACAATGAGCGTAGCTACGTGACCTTGAACGT
CCTGTTTAG	Sr-Or-Kr-Ef_synthetic	AGCTACGAAACAATGAGCGTAGCTACGATTAGCATCCCGTAGCTAGCGGCCCCACCCCGTAGCTACGTTCAAGGTCACGT
CCTTAAAGT	Or-Sr-Kr-Er_synthetic	AGCTACGATTAGCATCCCGTAGCTACGAAACAATGAGCGTAGCTAGCGGCCCCACCCCGTAGCTACGTGACCTTGAACGT
CCTTACAAC	Sf-Of-Kf_synthetic	AGCTACGCTCATTGTTTCGTAGCTACGGGATGCTAATCGTAGCTACGGGGTGGGGCCGCT
CCTTACGGT	Of-Sf-Er-Kr_synthetic	AGCTACGGGATGCTAATCGTAGCTACGCTCATTGTTTCGTAGCTACGTGACCTTGAACGTAGCTAGCGGCCCCACCCCGT
CCTTAGCTG	Sf-Or-Ef-Kr_synthetic	AGCTACGCTCATTGTTTCGTAGCTACGATTAGCATCCCGTAGCTACGTTCAAGGTCACGTAGCTAGCGGCCCCACCCCGT
CCTTAGGGA	Of-Sf-Ef_synthetic	AGCTACGGGATGCTAATCGTAGCTACGCTCATTGTTTCGTAGCTACGTTCAAGGTCACGT
CCTTATTGC	Sr-Ef-Or_synthetic	AGCTACGAAACAATGAGCGTAGCTACGTTCAAGGTCACGTAGCTACGATTAGCATCCCGT
CCTTCAGCA	Sr-Or-Kf-Er_synthetic	AGCTACGAAACAATGAGCGTAGCTACGATTAGCATCCCGTAGCTACGGGGTGGGGCCGCTAGCTACGTGACCTTGAACGT
CCTTCATAA	Sf-Kf-Or-Er_synthetic	AGCTACGCTCATTGTTTCGTAGCTACGGGGTGGGGCCGCTAGCTACGATTAGCATCCCGTAGCTACGTGACCTTGAACGT
CCTTCATGG	Er-Kr-Or-Sf_synthetic	AGCTACGTGACCTTGAACGTAGCTAGCGGCCCCACCCCGTAGCTACGATTAGCATCCCGTAGCTACGCTCATTGTTTCGT
CCTTCCGCT	Of-Er-Kr-Sf_synthetic	AGCTACGGGATGCTAATCGTAGCTACGTGACCTTGAACGTAGCTAGCGGCCCCACCCCGTAGCTACGCTCATTGTTTCGT
CCTTCCTGT	Kr-Or-Ef_synthetic	AGCTAGCGGCCCCACCCCGTAGCTACGATTAGCATCCCGTAGCTACGTTCAAGGTCACGT
CCTTCGGAC	Sr-Or-Ef_synthetic	AGCTACGAAACAATGAGCGTAGCTACGATTAGCATCCCGTAGCTACGTTCAAGGTCACGT
CCTTCTAAC	Or-Er-Kf-Sr_synthetic	AGCTACGATTAGCATCCCGTAGCTACGTGACCTTGAACGTAGCTACGGGGTGGGGCCGCTAGCTACGAAACAATGAGCGT
CCTTCTTCG	Ef-Kr-Sr-Of_synthetic	AGCTACGTTCAAGGTCACGTAGCTAGCGGCCCCACCCCGTAGCTACGAAACAATGAGCGTAGCTACGGGATGCTAATCGT
CCTTGACAC	Ef-Kr_synthetic	AGCTACGTTCAAGGTCACGTAGCTAGCGGCCCCACCCCGT
CCTTGCACA	Or-Er-Sf-Kr_synthetic	AGCTACGATTAGCATCCCGTAGCTACGTGACCTTGAACGTAGCTACGCTCATTGTTTCGTAGCTAGCGGCCCCACCCCGT
CCTTGCCTG	Ef-Kf-Or-Sf_synthetic	AGCTACGTTCAAGGTCACGTAGCTACGGGGTGGGGCCGCTAGCTACGATTAGCATCCCGTAGCTACGCTCATTGTTTCGT
CCTTGCGTT	Er-Of-Kr-Sr_synthetic	AGCTACGTGACCTTGAACGTAGCTACGGGATGCTAATCGTAGCTAGCGGCCCCACCCCGTAGCTACGAAACAATGAGCGT
CCTTGTTAG	Or-Kr-Er-Sr_synthetic	AGCTACGATTAGCATCCCGTAGCTAGCGGCCCCACCCCGTAGCTACGTGACCTTGAACGTAGCTACGAAACAATGAGCGT
CCTTGTTTA	Sf-Of-Er-Kr_synthetic	AGCTACGCTCATTGTTTCGTAGCTACGGGATGCTAATCGTAGCTACGTGACCTTGAACGTAGCTAGCGGCCCCACCCCGT
CCTTTACTA	Or-Sr-Kf-Er_synthetic	AGCTACGATTAGCATCCCGTAGCTACGAAACAATGAGCGTAGCTACGGGGTGGGGCCGCTAGCTACGTGACCTTGAACGT
CCTTTAGAA	Kf-Or_synthetic	AGCTACGGGGTGGGGCCGCTAGCTACGATTAGCATCCCGT
CCTTTAGGC	Sf-Kf-Er-Or_synthetic	AGCTACGCTCATTGTTTCGTAGCTACGGGGTGGGGCCGCTAGCTACGTGACCTTGAACGTAGCTACGATTAGCATCCCGT
CCTTTCAGG	Of-Kr-Sf-Ef_synthetic	AGCTACGGGATGCTAATCGTAGCTAGCGGCCCCACCCCGTAGCTACGCTCATTGTTTCGTAGCTACGTTCAAGGTCACGT
CCTTTCCCG	Kf-Er-Or-Sf_synthetic	AGCTACGGGGTGGGGCCGCTAGCTACGTGACCTTGAACGTAGCTACGATTAGCATCCCGTAGCTACGCTCATTGTTTCGT
CCTTTGCTC	Kr-Ef-Sf-Or_synthetic	AGCTAGCGGCCCCACCCCGTAGCTACGTTCAAGGTCACGTAGCTACGCTCATTGTTTCGTAGCTACGATTAGCATCCCGT
CGAAAGATT	Of-Kf-Sf_synthetic	AGCTACGGGATGCTAATCGTAGCTACGGGGTGGGGCCGCTAGCTACGCTCATTGTTTCGT
CGAAATACC	Kf-Sr-Ef_synthetic	AGCTACGGGGTGGGGCCGCTAGCTACGAAACAATGAGCGTAGCTACGTTCAAGGTCACGT
CGAACAGGC	Ef-Kf-Sf-Of_synthetic	AGCTACGTTCAAGGTCACGTAGCTACGGGGTGGGGCCGCTAGCTACGCTCATTGTTTCGTAGCTACGGGATGCTAATCGT
CGAACGTTC	Kr-Or-Er_synthetic	AGCTAGCGGCCCCACCCCGTAGCTACGATTAGCATCCCGTAGCTACGTGACCTTGAACGT
CGAAGAACA	Sf-Of-Kr-Ef_synthetic	AGCTACGCTCATTGTTTCGTAGCTACGGGATGCTAATCGTAGCTAGCGGCCCCACCCCGTAGCTACGTTCAAGGTCACGT
CGAAGCACC	Kr-Sf-Ef-Or_synthetic	AGCTAGCGGCCCCACCCCGTAGCTACGCTCATTGTTTCGTAGCTACGTTCAAGGTCACGTAGCTACGATTAGCATCCCGT
CGAAGGAAG	Er-Kr-Sf-Or_synthetic	AGCTACGTGACCTTGAACGTAGCTAGCGGCCCCACCCCGTAGCTACGCTCATTGTTTCGTAGCTACGATTAGCATCCCGT
CGAAGGGAT	Of-Ef-Sr-Kf_synthetic	AGCTACGGGATGCTAATCGTAGCTACGTTCAAGGTCACGTAGCTACGAAACAATGAGCGTAGCTACGGGGTGGGGCCGCT
CGAAGGGTG	Sf-Er_synthetic	AGCTACGCTCATTGTTTCGTAGCTACGTGACCTTGAACGT
CGAAGTCAC	Sf-Kf-Er-Or_synthetic	AGCTACGCTCATTGTTTCGTAGCTACGGGGTGGGGCCGCTAGCTACGTGACCTTGAACGTAGCTACGATTAGCATCCCGT
CGAAGTTAG	Kr-Or-Ef-Sr_synthetic	AGCTAGCGGCCCCACCCCGTAGCTACGATTAGCATCCCGTAGCTACGTTCAAGGTCACGTAGCTACGAAACAATGAGCGT
CGAATAGTT	Kr-Ef-Sr-Or_synthetic	AGCTAGCGGCCCCACCCCGTAGCTACGTTCAAGGTCACGTAGCTACGAAACAATGAGCGTAGCTACGATTAGCATCCCGT
CGAATTAAG	Kf-Of-Sr-Ef_synthetic	AGCTACGGGGTGGGGCCGCTAGCTACGGGATGCTAATCGTAGCTACGAAACAATGAGCGTAGCTACGTTCAAGGTCACGT
CGACACTGG	Kf-Or-Sf_synthetic	AGCTACGGGGTGGGGCCGCTAGCTACGATTAGCATCCCGTAGCTACGCTCATTGTTTCGT
CGACAGCAT	Kr-Ef-Or_synthetic	AGCTAGCGGCCCCACCCCGTAGCTACGTTCAAGGTCACGTAGCTACGATTAGCATCCCGT
CGACATACG	Kr-Sr-Ef-Of_synthetic	AGCTAGCGGCCCCACCCCGTAGCTACGAAACAATGAGCGTAGCTACGTTCAAGGTCACGTAGCTACGGGATGCTAATCGT
CGACATGAG	Ef-Or-Kr_synthetic	AGCTACGTTCAAGGTCACGTAGCTACGATTAGCATCCCGTAGCTAGCGGCCCCACCCCGT
CGACATGTA	Of-Sr-Kf-Er_synthetic	AGCTACGGGATGCTAATCGTAGCTACGAAACAATGAGCGTAGCTACGGGGTGGGGCCGCTAGCTACGTGACCTTGAACGT
CGACCAACG	Er-Sr-Kr-Or_synthetic	AGCTACGTGACCTTGAACGTAGCTACGAAACAATGAGCGTAGCTAGCGGCCCCACCCCGTAGCTACGATTAGCATCCCGT
CGACCACGT	Er-Kf_synthetic	AGCTACGTGACCTTGAACGTAGCTACGGGGTGGGGCCGCT
CGACCGAGT	Or-Sr-Kr_synthetic	AGCTACGATTAGCATCCCGTAGCTACGAAACAATGAGCGTAGCTAGCGGCCCCACCCCGT
CGACCGGAA	Ef-Kr_synthetic	AGCTACGTTCAAGGTCACGTAGCTAGCGGCCCCACCCCGT
CGACCGTAC	Or-Sr-Kr_synthetic	AGCTACGATTAGCATCCCGTAGCTACGAAACAATGAGCGTAGCTAGCGGCCCCACCCCGT
CGACCGTTG	Sr-Of-Kf_synthetic	AGCTACGAAACAATGAGCGTAGCTACGGGATGCTAATCGTAGCTACGGGGTGGGGCCGCT
CGACCTAAT	Kf-Sf-Or_synthetic	AGCTACGGGGTGGGGCCGCTAGCTACGCTCATTGTTTCGTAGCTACGATTAGCATCCCGT
CGACCTTTA	Er-Sr-Kr-Or_synthetic	AGCTACGTGACCTTGAACGTAGCTACGAAACAATGAGCGTAGCTAGCGGCCCCACCCCGTAGCTACGATTAGCATCCCGT
CGACGAATC	Of-Er-Kf-Sr_synthetic	AGCTACGGGATGCTAATCGTAGCTACGTGACCTTGAACGTAGCTACGGGGTGGGGCCGCTAGCTACGAAACAATGAGCGT
CGACGTTTC	Or-Kr-Sr-Er_synthetic	AGCTACGATTAGCATCCCGTAGCTAGCGGCCCCACCCCGTAGCTACGAAACAATGAGCGTAGCTACGTGACCTTGAACGT
CGACTAGGC	Sr-Kr-Of-Ef_synthetic	AGCTACGAAACAATGAGCGTAGCTAGCGGCCCCACCCCGTAGCTACGGGATGCTAATCGTAGCTACGTTCAAGGTCACGT
CGACTCCTA	Sf-Kr-Er_synthetic	AGCTACGCTCATTGTTTCGTAGCTAGCGGCCCCACCCCGTAGCTACGTGACCTTGAACGT
CGACTCGTG	Kf-Sf-Or-Ef_synthetic	AGCTACGGGGTGGGGCCGCTAGCTACGCTCATTGTTTCGTAGCTACGATTAGCATCCCGTAGCTACGTTCAAGGTCACGT
CGACTTGAC	Er-Of-Sr-Kf_synthetic	AGCTACGTGACCTTGAACGTAGCTACGGGATGCTAATCGTAGCTACGAAACAATGAGCGTAGCTACGGGGTGGGGCCGCT
CGAGAAATG	Of-Kr_synthetic	AGCTACGGGATGCTAATCGTAGCTAGCGGCCCCACCCCGT
CGAGAACAA	Sr-Of-Kf-Ef_synthetic	AGCTACGAAACAATGAGCGTAGCTACGGGATGCTAATCGTAGCTACGGGGTGGGGCCGCTAGCTACGTTCAAGGTCACGT
CGAGACTTC	Of-Kr-Sr-Ef_synthetic	AGCTACGGGATGCTAATCGTAGCTAGCGGCCCCACCCCGTAGCTACGAAACAATGAGCGTAGCTACGTTCAAGGTCACGT
CGAGAGAAC	Er-Kr-Sf-Of_synthetic	AGCTACGTGACCTTGAACGTAGCTAGCGGCCCCACCCCGTAGCTACGCTCATTGTTTCGTAGCTACGGGATGCTAATCGT
CGAGAGTAA	Sf-Er-Kf-Or_synthetic	AGCTACGCTCATTGTTTCGTAGCTACGTGACCTTGAACGTAGCTACGGGGTGGGGCCGCTAGCTACGATTAGCATCCCGT
CGAGCCAGT	Sf-Of_synthetic	AGCTACGCTCATTGTTTCGTAGCTACGGGATGCTAATCGT
CGAGGAACG	Kf-Of-Er-Sr_synthetic	AGCTACGGGGTGGGGCCGCTAGCTACGGGATGCTAATCGTAGCTACGTGACCTTGAACGTAGCTACGAAACAATGAGCGT
CGAGGATCA	Sf-Er-Kf-Or_synthetic	AGCTACGCTCATTGTTTCGTAGCTACGTGACCTTGAACGTAGCTACGGGGTGGGGCCGCTAGCTACGATTAGCATCCCGT
CGAGGATGG	Sr-Er-Kf-Or_synthetic	AGCTACGAAACAATGAGCGTAGCTACGTGACCTTGAACGTAGCTACGGGGTGGGGCCGCTAGCTACGATTAGCATCCCGT
CGAGGCACT	Sr-Of-Ef_synthetic	AGCTACGAAACAATGAGCGTAGCTACGGGATGCTAATCGTAGCTACGTTCAAGGTCACGT
CGAGGCTAC	Kf-Ef-Sr-Or_synthetic	AGCTACGGGGTGGGGCCGCTAGCTACGTTCAAGGTCACGTAGCTACGAAACAATGAGCGTAGCTACGATTAGCATCCCGT
CGAGGCTGT	Sr-Or-Er-Kr_synthetic	AGCTACGAAACAATGAGCGTAGCTACGATTAGCATCCCGTAGCTACGTGACCTTGAACGTAGCTAGCGGCCCCACCCCGT
CGAGGGAGA	Kr-Sf_synthetic	AGCTAGCGGCCCCACCCCGTAGCTACGCTCATTGTTTCGT
CGAGGTAGT	Er-Sr-Kr_synthetic	AGCTACGTGACCTTGAACGTAGCTACGAAACAATGAGCGTAGCTAGCGGCCCCACCCCGT
CGAGGTGAT	Of-Ef-Sf-Kf_synthetic	AGCTACGGGATGCTAATCGTAGCTACGTTCAAGGTCACGTAGCTACGCTCATTGTTTCGTAGCTACGGGGTGGGGCCGCT
CGAGGTTGA	Of-Ef-Sf_synthetic	AGCTACGGGATGCTAATCGTAGCTACGTTCAAGGTCACGTAGCTACGCTCATTGTTTCGT
CGAGTCCGT	Er-Kr-Or_synthetic	AGCTACGTGACCTTGAACGTAGCTAGCGGCCCCACCCCGTAGCTACGATTAGCATCCCGT
CGAGTCGAC	Er-Kf-Sr_synthetic	AGCTACGTGACCTTGAACGTAGCTACGGGGTGGGGCCGCTAGCTACGAAACAATGAGCGT
CGAGTTAAT	Of-Er-Kr_synthetic	AGCTACGGGATGCTAATCGTAGCTACGTGACCTTGAACGTAGCTAGCGGCCCCACCCCGT
CGAGTTGGA	Kf-Of-Sr-Er_synthetic	AGCTACGGGGTGGGGCCGCTAGCTACGGGATGCTAATCGTAGCTACGAAACAATGAGCGTAGCTACGTGACCTTGAACGT
CGAGTTTCC	Er-Sf-Kf-Of_synthetic	AGCTACGTGACCTTGAACGTAGCTACGCTCATTGTTTCGTAGCTACGGGGTGGGGCCGCTAGCTACGGGATGCTAATCGT
CGATAACGT	Kr-Or-Sr-Ef_synthetic	AGCTAGCGGCCCCACCCCGTAGCTACGATTAGCATCCCGTAGCTACGAAACAATGAGCGTAGCTACGTTCAAGGTCACGT
CGATAAGTC	Er-Kr-Sr-Or_synthetic	AGCTACGTGACCTTGAACGTAGCTAGCGGCCCCACCCCGTAGCTACGAAACAATGAGCGTAGCTACGATTAGCATCCCGT
CGATACAAG	Or-Kr-Ef-Sr_synthetic	AGCTACGATTAGCATCCCGTAGCTAGCGGCCCCACCCCGTAGCTACGTTCAAGGTCACGTAGCTACGAAACAATGAGCGT
CGATACATT	Kf-Sr-Er-Or_synthetic	AGCTACGGGGTGGGGCCGCTAGCTACGAAACAATGAGCGTAGCTACGTGACCTTGAACGTAGCTACGATTAGCATCCCGT
CGATACGAC	Or-Sr-Ef-Kf_synthetic	AGCTACGATTAGCATCCCGTAGCTACGAAACAATGAGCGTAGCTACGTTCAAGGTCACGTAGCTACGGGGTGGGGCCGCT
CGATACGTG	Kf-Of-Ef_synthetic	AGCTACGGGGTGGGGCCGCTAGCTACGGGATGCTAATCGTAGCTACGTTCAAGGTCACGT
CGATACTCT	Kf-Er-Sf-Or_synthetic	AGCTACGGGGTGGGGCCGCTAGCTACGTGACCTTGAACGTAGCTACGCTCATTGTTTCGTAGCTACGATTAGCATCCCGT
CGATACTGC	Ef-Kf-Sr_synthetic	AGCTACGTTCAAGGTCACGTAGCTACGGGGTGGGGCCGCTAGCTACGAAACAATGAGCGT
CGATAGGCT	Sr-Er-Kf_synthetic	AGCTACGAAACAATGAGCGTAGCTACGTGACCTTGAACGTAGCTACGGGGTGGGGCCGCT
CGATATATG	Ef-Kf-Sr-Of_synthetic	AGCTACGTTCAAGGTCACGTAGCTACGGGGTGGGGCCGCTAGCTACGAAACAATGAGCGTAGCTACGGGATGCTAATCGT
CGATCCTGG	Or-Ef-Kr_synthetic	AGCTACGATTAGCATCCCGTAGCTACGTTCAAGGTCACGTAGCTAGCGGCCCCACCCCGT
CGATCGGGT	Basal
CGATCGTAG	Kr-Sf-Ef-Of_synthetic	AGCTAGCGGCCCCACCCCGTAGCTACGCTCATTGTTTCGTAGCTACGTTCAAGGTCACGTAGCTACGGGATGCTAATCGT
[truncated: 3,201 more rows]

## Sheet: 1C - SYN_ExpressionSummary
Element_id	Rep1_Element_normalized	Rep2_Element_normalized	Rep3_Element_normalized	Rep1_Element_norm_SEM	Rep2_Element_norm_SEM	Rep3_Element_norm_SEM	Class	Class_code	Element_normalized_mean	Element_normalized_CV	Element_norm_SEM_all	wilcox_pval_rep1	wilcox_pval_rep2	wilcox_pval_rep3	Bonferroni_0.05_pass	Bonferroni_0.01_pass
Ef-Kf-Of-Sf_synthetic	2.94616	3.55376	3.68899	0.224024	0.284723	0.205373	4mer	4	2.94616	0.421205	0.716457	9.5173e-06	8.45722e-06	8.45722e-06	1	1
Ef-Kf-Of-Sr_synthetic	3.74962	5.14415	4.61798	0.406415	0.668199	0.628328	4mer	4	3.74962	0.491758	1.06458	7.51056e-06	5.56679e-06	7.51056e-06	1	1
Ef-Kf-Of_synthetic	2.06283	2.79975	2.27735	0.170716	0.214241	0.367685	3mer	3	2.06283	0.366591	0.4366	0.000162398	0.000113288	0.00625684	0	0
Ef-Kf-Or-Sf_synthetic	4.54774	5.18142	4.92074	0.375363	0.759917	0.751639	4mer	4	4.54774	0.43076	1.13102	5.2407e-06	6.27818e-06	7.07609e-06	1	1
Ef-Kf-Or-Sr_synthetic	5.44289	7.13541	6.68508	0.630519	0.953272	0.934657	4mer	4	5.44289	0.51507	1.61858	1.55765e-05	1.6569e-05	1.46407e-05	1	1
Ef-Kf-Or_synthetic	3.63099	4.39225	4.39438	0.175076	0.265713	0.377046	3mer	3	3.63099	0.443464	0.929659	2.25046e-05	2.25046e-05	2.11754e-05	1	0
Ef-Kf-Sf-Of_synthetic	3.62588	4.49178	4.40534	0.334641	0.157435	0.412937	4mer	4	3.62588	0.450715	0.943529	7.51056e-06	5.56679e-06	5.91226e-06	1	1
Ef-Kf-Sf-Or_synthetic	4.76545	5.93169	5.68301	0.524906	0.64408	0.64571	4mer	4	4.76545	0.479646	1.31967	5.2407e-06	4.93294e-06	4.36855e-06	1	1
Ef-Kf-Sf_synthetic	2.01226	2.48049	2.53327	0.0831633	0.234728	0.149611	3mer	3	2.01226	0.353178	0.410315	1.51693e-05	1.51693e-05	1.20303e-05	1	1
Ef-Kf-Sr-Of_synthetic	4.80817	5.72765	5.81841	0.209352	0.345597	0.388052	4mer	4	4.80817	0.472531	1.31174	4.93294e-06	4.93294e-06	4.36855e-06	1	1
Ef-Kf-Sr-Or_synthetic	4.59763	5.71664	6.32495	0.647422	0.484246	0.633976	4mer	4	4.59763	0.518335	1.37589	1.99212e-05	1.99212e-05	1.55765e-05	1	1
Ef-Kf-Sr_synthetic	2.51242	2.88978	3.59869	0.207695	0.315795	0.473145	3mer	3	2.51242	0.436569	0.633264	1.13485e-05	1.27512e-05	8.45722e-06	1	1
Ef-Kf_synthetic	1.9897	2.08388	2.10317	0.307862	0.425179	0.384183	2mer	2	1.9897	0.267264	0.30702	6.53078e-05	0.00198925	8.69061e-05	0	0
Ef-Kr-Of-Sf_synthetic	3.21468	3.33826	3.1711	0.227518	0.625242	0.411849	4mer	4	3.21468	0.349307	0.648311	0.000321224	0.000363964	0.000411975	0	0
Ef-Kr-Of-Sr_synthetic	2.60782	3.73474	3.35634	0.722546	0.655556	0.758076	4mer	4	2.60782	0.464259	0.699	0.0374319	0.00129181	0.00156267	0	0
Ef-Kr-Of_synthetic	1.77979	2.30701	1.56621	0.422855	0.394607	0.767739	3mer	3	1.77979	0.303844	0.312218	NA	NA	NA	0	0
Ef-Kr-Or-Sf_synthetic	3.45624	3.42168	3.866	1.16309	0.478159	0.626042	4mer	4	3.45624	0.377964	0.754213	0.00046585	0.00034197	0.000321224	0	0
Ef-Kr-Or-Sr_synthetic	4.67663	5.2488	7.14515	0.745138	1.50932	1.09669	4mer	4	4.67663	0.549857	1.48464	0.00106489	0.0143762	0.000875341	0	0
Ef-Kr-Or_synthetic	3.40182	4.89098	5.12048	0.965704	0.103996	0.56482	3mer	3	3.40182	0.557175	1.09431	0.00585232	0.00420512	0.00449626	0	0
Ef-Kr-Sf-Of_synthetic	3.68264	5.07189	4.65963	0.441185	0.366128	0.390866	4mer	4	3.68264	0.497157	1.05704	7.84379e-05	6.50834e-05	7.84379e-05	1	0
Ef-Kr-Sf-Or_synthetic	3.90968	5.42046	4.38095	1.76755	1.54337	1.88932	4mer	4	3.90968	0.484302	1.09319	0.0103351	0.00449626	0.229209	0	0
Ef-Kr-Sf_synthetic	2.276	2.73715	3.05081	0.491196	0.710267	1.13716	3mer	3	2.276	0.396306	0.520765	0.00188497	0.00188497	0.0085116	0	0
Ef-Kr-Sr-Of_synthetic	4.43007	5.32099	5.56782	0.549573	0.962019	0.458763	4mer	4	4.43007	0.476403	1.2185	7.84379e-05	7.84379e-05	6.11322e-05	1	0
Ef-Kr-Sr-Or_synthetic	4.46495	5.88266	9.21113	2.11134	2.02016	1.98529	4mer	4	4.46495	0.761935	1.96415	NA	NA	NA	0	0
Ef-Kr-Sr_synthetic	2.50534	3.4715	3.02453	NA	NA	NA	3mer	3	2.50534	0.429213	0.62084	NA	NA	NA	0	0
Ef-Kr_synthetic	1.59853	1.48395	1.46507	0.0664222	0.453805	0.367093	2mer	2	1.59853	0.165515	0.152756	NA	NA	NA	0	0
Ef-Of-Kf-Sf_synthetic	3.52286	4.47787	4.42367	0.231888	0.390293	0.399545	4mer	4	3.52286	0.462877	0.941457	6.66573e-06	6.27818e-06	5.91226e-06	1	1
Ef-Of-Kf-Sr_synthetic	4.58578	5.93827	6.11998	0.579381	0.766744	0.804515	4mer	4	4.58578	0.517856	1.37108	6.27818e-06	5.56679e-06	4.93294e-06	1	1
Ef-Of-Kf_synthetic	2.88804	3.59541	3.48797	0.241586	0.345756	0.40971	3mer	3	2.88804	0.416499	0.694475	7.97046e-06	7.97046e-06	7.97046e-06	1	1
Ef-Of-Kr-Sf_synthetic	4.19763	5.00119	4.93733	0.306889	0.346969	0.261966	4mer	4	4.19763	0.450615	1.09207	5.56679e-06	5.56679e-06	5.2407e-06	1	1
Ef-Of-Kr-Sr_synthetic	5.32938	6.40169	6.47753	0.335258	0.438193	0.416803	4mer	4	5.32938	0.485688	1.49442	4.36855e-06	4.93294e-06	3.41972e-06	1	1
Ef-Of-Kr_synthetic	3.93029	4.92956	4.46585	0.472204	0.572294	0.612055	3mer	3	3.93029	0.450023	1.02117	7.37222e-05	6.92755e-05	8.34378e-05	0	0
Ef-Of-Sf-Kf_synthetic	3.25985	3.86794	3.69622	0.212417	0.176871	0.267562	4mer	4	3.25985	0.407653	0.767233	7.51056e-06	6.66573e-06	7.97046e-06	1	1
Ef-Of-Sf-Kr_synthetic	3.44436	4.07077	4.50822	0.348497	0.444361	0.327332	4mer	4	3.44436	0.454652	0.904121	8.97231e-06	7.97046e-06	5.56679e-06	1	1
Ef-Of-Sf_synthetic	1.45186	1.26834	1.37063	0.117816	0.106036	0.0949133	3mer	3	1.45186	0.135482	0.113566	0.000103804	0.000777736	0.000223425	0	0
Ef-Of-Sr-Kf_synthetic	3.84407	5.17979	4.43292	0.27731	0.30448	0.323719	4mer	4	3.84407	0.475146	1.05453	6.27818e-06	5.2407e-06	5.91226e-06	1	1
Ef-Of-Sr-Kr_synthetic	4.3614	6.52881	5.33569	0.56748	0.505858	0.693011	4mer	4	4.3614	0.544742	1.37169	0.00449626	0.00420512	0.00420512	0	0
Ef-Of-Sr_synthetic	1.58838	1.65355	1.83385	0.343407	0.377453	0.341397	3mer	3	1.58838	0.227405	0.208542	0.00340478	0.00902843	0.000383506	0	0
Ef-Of_synthetic	1.10429	1.09914	1.04559	0.0962724	0.163634	0.153755	2mer	2	1.10429	0.0446111	0.0284424	0.0470174	0.0842063	0.401187	0	0
Ef-Or-Kf-Sf_synthetic	4.02603	4.97528	5.28519	0.395798	0.598556	0.36243	4mer	4	4.02603	0.485806	1.12922	6.27818e-06	6.66573e-06	5.2407e-06	1	1
Ef-Or-Kf-Sr_synthetic	5.07289	6.05656	6.16907	0.339007	0.309589	0.370699	4mer	4	5.07289	0.479691	1.40494	4.36855e-06	4.93294e-06	4.1101e-06	1	1
Ef-Or-Kf_synthetic	2.36947	2.88846	2.62692	0.238973	0.380621	0.274227	3mer	3	2.36947	0.355041	0.485702	1.51693e-05	3.34897e-05	1.908e-05	1	0
Ef-Or-Kr-Sf_synthetic	4.59349	5.60977	6.46039	0.652518	0.522991	0.648094	4mer	4	4.59349	0.522859	1.38665	5.2407e-06	4.93294e-06	3.86633e-06	1	1
Ef-Or-Kr-Sr_synthetic	5.23059	6.67027	7.02946	0.196559	0.335591	0.289773	4mer	4	5.23059	0.528907	1.59724	4.64254e-06	4.64254e-06	3.02282e-06	1	1
Ef-Or-Kr_synthetic	2.75409	3.56553	3.71124	0.30492	0.24793	0.333158	3mer	3	2.75409	0.452116	0.7189	3.42914e-05	2.54051e-05	2.69853e-05	1	0
Ef-Or-Sf-Kf_synthetic	3.98629	5.15041	5.31814	0.483193	0.327569	0.284966	4mer	4	3.98629	0.501443	1.15407	8.4121e-05	5.2407e-06	4.64254e-06	1	1
Ef-Or-Sf-Kr_synthetic	4.9548	7.40367	7.26797	0.279579	0.53038	0.577092	4mer	4	4.9548	0.603511	1.72644	0.000249458	0.00023403	0.000192946	0	0
Ef-Or-Sf_synthetic	1.25675	1.33344	1.36469	0.0504253	0.042873	0.0581703	3mer	3	1.25675	0.131675	0.0955414	0.000182733	0.000103804	9.34744e-05	0	0
Ef-Or-Sr-Kf_synthetic	4.73256	6.42954	6.18969	0.424745	0.526845	0.496271	4mer	4	4.73256	0.529681	1.44727	4.93294e-06	4.64254e-06	3.86633e-06	1	1
Ef-Or-Sr-Kr_synthetic	4.8636	6.02875	8.38206	0.407549	0.199116	2.47291	4mer	4	4.8636	0.63369	1.7794	1.87378e-05	1.76217e-05	1.46407e-05	1	1
Ef-Or-Sr_synthetic	1.30015	1.34833	1.39182	0.0834793	0.0881372	0.0622619	3mer	3	1.30015	0.13643	0.10241	0.000192197	0.000348103	0.000115204	0	0
Ef-Or_synthetic	1.58361	1.66101	2.13802	0.595182	0.790376	0.684037	2mer	2	1.58361	0.294695	0.269439	0.138586	0.657303	0.000322033	0	0
Ef-Sf-Kf-Of_synthetic	5.59467	7.23671	6.91608	0.575264	0.822712	0.960771	4mer	4	5.59467	0.514828	1.66294	4.1101e-06	4.36855e-06	4.1101e-06	1	1
Ef-Sf-Kf-Or_synthetic	6.04759	7.93095	7.45625	1.29231	1.50365	1.43348	4mer	4	6.04759	0.524978	1.833	1.99212e-05	1.76217e-05	1.6569e-05	1	0
Ef-Sf-Kf_synthetic	2.2923	2.92362	2.90243	0.134151	0.14221	0.181864	3mer	3	2.2923	0.393443	0.520706	3.42914e-05	3.04307e-05	3.23063e-05	1	0
Ef-Sf-Kr-Of_synthetic	7.79733	9.92062	9.69896	1.37359	1.59684	1.69982	4mer	4	7.79733	0.536027	2.41308	2.11754e-05	1.55765e-05	1.55765e-05	1	1
Ef-Sf-Kr-Or_synthetic	7.0045	9.05789	8.82857	0.551312	0.752154	0.540015	4mer	4	7.0045	0.537138	2.17221	3.41972e-06	3.41972e-06	3.2154e-06	1	1
Ef-Sf-Kr_synthetic	3.45064	3.69129	3.46503	0.227316	0.320689	0.220114	3mer	3	3.45064	0.368804	0.73474	2.25046e-05	2.69853e-05	2.86588e-05	1	0
Ef-Sf-Of-Kf_synthetic	7.36845	9.16929	10.071	0.540991	0.604352	0.573783	4mer	4	7.36845	0.555345	2.36254	3.2154e-06	3.41972e-06	3.02282e-06	1	1
Ef-Sf-Of-Kr_synthetic	8.13813	8.87011	10.4507	1.10347	1.44939	1.45682	4mer	4	8.13813	0.514759	2.41862	3.63646e-06	4.1101e-06	3.2154e-06	1	1
Ef-Sf-Of_synthetic	1.43359	1.59813	1.76291	0.115865	0.250659	0.213086	3mer	3	1.43359	0.228749	0.189332	8.4121e-05	7.9783e-05	3.53977e-05	1	0
Ef-Sf-Or-Kf_synthetic	4.62114	4.91973	5.27671	0.643843	0.693195	0.721373	4mer	4	4.62114	0.430142	1.14762	8.45722e-06	6.27818e-06	6.66573e-06	1	1
Ef-Sf-Or-Kr_synthetic	6.12209	7.35779	7.17199	0.520301	0.777823	1.03168	4mer	4	6.12209	0.488699	1.72735	1.37588e-05	1.55765e-05	1.46407e-05	1	1
Ef-Sf-Or_synthetic	1.28499	1.26675	1.33131	0.0805302	0.110141	0.142583	3mer	3	1.28499	0.11647	0.0864079	0.00041769	0.00165275	0.000887712	0	0
Ef-Sf_synthetic	0.967271	1.17342	0.947645	0.0637434	0.0937663	0.0865806	2mer	2	0.967271	0.106668	0.0595691	0.156582	0.00807083	0.239892	0	0
Ef-Sr-Kf-Of_synthetic	6.59524	8.45548	8.40252	0.636577	0.691981	0.795765	4mer	4	6.59524	0.533239	2.03045	1.37588e-05	1.29277e-05	1.21446e-05	1	1
Ef-Sr-Kf-Or_synthetic	6.56179	8.25116	8.1892	0.794783	1.00639	1.19397	4mer	4	6.56179	0.521843	1.97698	3.86633e-06	4.1101e-06	3.63646e-06	1	1
Ef-Sr-Kf_synthetic	2.71517	3.08872	3.34953	0.0498749	0.299792	0.159914	3mer	3	2.71517	0.389699	0.610893	7.97046e-06	8.97231e-06	7.97046e-06	1	1
Ef-Sr-Kr-Of_synthetic	6.61573	7.71336	7.89827	0.585674	0.914152	0.919931	4mer	4	6.61573	0.491884	1.8788	1.37588e-05	1.46407e-05	1.37588e-05	1	1
Ef-Sr-Kr-Or_synthetic	7.36801	9.30752	9.00553	0.944937	0.985658	1.08128	4mer	4	7.36801	0.525925	2.23724	3.63646e-06	3.41972e-06	3.2154e-06	1	1
Ef-Sr-Kr_synthetic	3.04461	3.51521	3.54274	0.227561	0.249691	0.225316	3mer	3	3.04461	0.395989	0.696073	7.07609e-06	7.97046e-06	8.45722e-06	1	1
Ef-Sr-Of-Kf_synthetic	9.02401	10.6205	10.6409	0.376311	0.938038	0.831418	4mer	4	9.02401	0.510884	2.66171	3.02282e-06	3.41972e-06	3.2154e-06	1	1
Ef-Sr-Of-Kr_synthetic	9.65468	11.6114	11.9393	1.12221	1.2858	1.49798	4mer	4	9.65468	0.531789	2.96426	3.41972e-06	3.2154e-06	3.02282e-06	1	1
Ef-Sr-Of_synthetic	1.42774	1.55571	1.60387	0.0863224	0.135793	0.0859121	3mer	3	1.42774	0.192469	0.158653	0.000199417	0.000199417	0.000128687	0	0
Ef-Sr-Or-Kf_synthetic	4.61953	5.75959	5.83166	0.281985	0.475157	0.495927	4mer	4	4.61953	0.491547	1.311	4.64254e-06	4.93294e-06	4.1101e-06	1	1
Ef-Sr-Or-Kr_synthetic	5.4199	6.37906	6.55269	0.502809	0.714015	0.764651	4mer	4	5.4199	0.480941	1.50495	4.36855e-06	4.93294e-06	4.36855e-06	1	1
Ef-Sr-Or_synthetic	1.29973	1.48094	1.34315	0.0891814	0.0806171	0.0793446	3mer	3	1.29973	0.155887	0.116977	0.000887712	0.000143732	0.000539384	0	0
Ef-Sr_synthetic	1.0195	1.05665	1.09779	0.0642798	0.0601341	0.0560527	2mer	2	1.0195	0.0423361	0.0249193	0.0874719	0.0241194	0.0155037	0	0
Er-Kf-Of-Sf_synthetic	3.09756	3.74926	3.875	0.141623	0.174476	0.229206	4mer	4	3.09756	0.429794	0.768634	7.97046e-06	7.51056e-06	7.51056e-06	1	1
Er-Kf-Of-Sr_synthetic	3.51528	4.47513	4.28591	0.314771	0.518933	0.405662	4mer	4	3.51528	0.455388	0.924232	7.51056e-06	6.27818e-06	7.07609e-06	1	1
Er-Kf-Of_synthetic	2.04182	2.5024	2.39797	0.162247	0.199122	0.217971	3mer	3	2.04182	0.335964	0.39605	4.88597e-05	3.42914e-05	4.34515e-05	1	0
Er-Kf-Or-Sf_synthetic	4.6322	5.69529	5.75451	0.270518	0.392823	0.400594	4mer	4	4.6322	0.483676	1.29354	5.2407e-06	4.93294e-06	4.1101e-06	1	1
Er-Kf-Or-Sr_synthetic	4.79973	5.91547	6.13859	0.457842	0.326965	0.384889	4mer	4	4.79973	0.496296	1.3753	4.64254e-06	4.93294e-06	3.86633e-06	1	1
Er-Kf-Or_synthetic	3.56254	4.49666	4.66109	0.195243	0.220907	0.281534	3mer	3	3.56254	0.474589	0.976149	6.27818e-06	6.27818e-06	6.27818e-06	1	1
Er-Kf-Sf-Of_synthetic	4.5924	5.83261	6.03787	0.279488	0.424055	0.392539	4mer	4	4.5924	0.507992	1.3469	4.93294e-06	5.2407e-06	3.86633e-06	1	1
Er-Kf-Sf-Or_synthetic	4.15642	5.45644	5.01074	0.510321	0.53229	0.430238	4mer	4	4.15642	0.483821	1.16103	6.27818e-06	5.91226e-06	5.2407e-06	1	1
Er-Kf-Sf_synthetic	2.0861	2.51909	2.53051	0.293055	0.388878	0.336117	3mer	3	2.0861	0.344976	0.415493	0.00312337	0.00107818	0.000627494	0	0
Er-Kf-Sr-Of_synthetic	3.6134	5.07495	5.01059	0.444617	0.621017	0.427106	4mer	4	3.6134	0.527591	1.10066	8.45722e-06	6.27818e-06	4.93294e-06	1	1
Er-Kf-Sr-Or_synthetic	4.42485	5.72221	6.01174	0.191552	0.378951	0.288607	4mer	4	4.42485	0.519594	1.3274	1.76217e-05	1.87378e-05	1.46407e-05	1	1
Er-Kf-Sr_synthetic	2.73079	3.13126	3.23047	0.235387	0.305693	0.304848	3mer	3	2.73079	0.38016	0.599369	8.97231e-06	1.00938e-05	1.00938e-05	1	1
Er-Kf_synthetic	1.50075	1.31391	1.4957	0.109367	0.149378	0.198993	2mer	2	1.50075	0.156623	0.135708	0.000210472	0.00931111	0.00594916	0	0
Er-Kr-Of-Sf_synthetic	2.84828	3.27793	3.72873	0.574342	0.574121	0.650917	4mer	4	2.84828	0.420503	0.691498	0.000976986	0.000182733	9.5173e-06	1	1
Er-Kr-Of-Sr_synthetic	3.77641	5.07222	5.00352	0.696843	0.510254	0.421633	4mer	4	3.77641	0.504221	1.09936	0.000321224	0.000265837	0.000265837	0	0
Er-Kr-Of_synthetic	2.89181	3.46797	3.41913	0.779941	1.12952	1.17797	3mer	3	2.89181	0.400974	0.66946	0.00548253	0.00548253	0.00585232	0	0
Er-Kr-Or-Sf_synthetic	4.28811	5.22273	5.36601	0.643367	0.7088	0.739738	4mer	4	4.28811	0.474885	1.17569	1.51693e-05	5.91226e-06	4.93294e-06	1	1
Er-Kr-Or-Sr_synthetic	5.07928	6.12183	5.87426	0.672975	0.836386	0.917075	4mer	4	5.07928	0.470083	1.37853	1.6569e-05	1.6569e-05	1.76217e-05	1	0
Er-Kr-Or_synthetic	3.46446	4.25653	4.04671	0.501899	0.532667	0.315193	3mer	3	3.46446	0.432739	0.865567	0.00121163	0.00113607	0.00121163	0	0
Er-Kr-Sf-Of_synthetic	4.58429	5.36311	5.54298	0.48215	0.389671	0.543523	4mer	4	4.58429	0.463082	1.22566	1.87378e-05	1.87378e-05	1.55765e-05	1	1
Er-Kr-Sf-Or_synthetic	5.71295	7.38982	7.04906	0.863661	0.955909	0.906085	4mer	4	5.71295	0.516163	1.7025	6.11322e-05	5.74089e-05	5.05969e-05	1	0
Er-Kr-Sf_synthetic	2.32999	2.60969	3.09424	0.265292	0.293416	0.528158	3mer	3	2.32999	0.384733	0.51755	0.00046585	0.00046585	0.00043814	0	0
Er-Kr-Sr-Of_synthetic	3.92703	4.64162	3.91109	1.00079	0.51205	0.876282	4mer	4	3.92703	0.411575	0.933153	4.88597e-05	2.25046e-05	0.000136014	0	0
Er-Kr-Sr-Or_synthetic	4.3293	5.2802	3.85918	0.732045	2.40677	1.56282	4mer	4	4.3293	0.425516	1.06359	0.00480555	0.0443156	0.144902	0	0
Er-Kr-Sr_synthetic	2.55388	2.71208	1.79874	0.670907	0.395009	0.944129	3mer	3	2.55388	0.30776	0.453786	0.00240981	0.00146706	0.978059	0	0
Er-Kr_synthetic	1.51393	1.89261	1.74096	0.263431	0.34805	0.252414	2mer	2	1.51393	0.257794	0.225329	0.022053	0.00475885	0.00475885	0	0
Er-Of-Kf-Sf_synthetic	3.66547	4.70856	4.4861	0.154688	0.282344	0.213369	4mer	4	3.66547	0.464736	0.983503	6.66573e-06	5.91226e-06	6.27818e-06	1	1
Er-Of-Kf-Sr_synthetic	4.952	6.1106	6.05835	0.705752	0.708085	0.861696	4mer	4	4.952	0.487353	1.39336	7.51056e-06	5.91226e-06	5.91226e-06	1	1
Er-Of-Kf_synthetic	2.63853	3.01715	2.97231	0.193693	0.213141	0.192371	3mer	3	2.63853	0.361218	0.550264	1.07036e-05	8.97231e-06	9.5173e-06	1	1
Er-Of-Kr-Sf_synthetic	4.59381	5.5032	5.41924	0.293599	0.365402	0.402769	4mer	4	4.59381	0.462801	1.22746	5.2407e-06	5.2407e-06	4.64254e-06	1	1
Er-Of-Kr-Sr_synthetic	5.16469	6.44134	6.56597	0.260316	0.224014	0.258302	4mer	4	5.16469	0.504726	1.50501	5.2407e-06	4.93294e-06	3.2154e-06	1	1
Er-Of-Kr_synthetic	3.28513	3.76391	3.87829	0.187663	0.309772	0.239807	3mer	3	3.28513	0.409717	0.777099	2.3913e-05	2.54051e-05	2.3913e-05	1	0
Er-Of-Sf-Kf_synthetic	3.90962	4.4423	4.45867	0.220036	0.41199	0.290492	4mer	4	3.90962	0.423282	0.955441	5.56679e-06	6.27818e-06	6.27818e-06	1	1
Er-Of-Sf-Kr_synthetic	4.47155	4.5605	5.17637	0.380332	0.546659	0.759352	4mer	4	4.47155	0.423606	1.0936	1.99212e-05	2.3913e-05	2.11754e-05	1	0
Er-Of-Sf_synthetic	1.14099	1.31155	1.17574	0.12259	0.119619	0.0939637	3mer	3	1.14099	0.112172	0.0738931	0.0377697	0.000892202	0.00807083	0	0
Er-Of-Sr-Kf_synthetic	4.55047	5.42993	5.52553	0.326219	0.225068	0.434298	4mer	4	4.55047	0.468088	1.22977	4.93294e-06	4.93294e-06	4.64254e-06	1	1
Er-Of-Sr-Kr_synthetic	4.30702	5.36181	5.53251	0.542372	0.927579	0.575384	4mer	4	4.30702	0.48863	1.21506	0.000283219	0.000249458	0.00023403	0	0
Er-Of-Sr_synthetic	1.09735	1.09153	1.1465	0.0497374	0.11686	0.0761525	3mer	3	1.09735	0.0556745	0.0352728	0.00731139	0.0485533	0.0122499	0	0
Er-Of_synthetic	0.892206	0.86867	0.903869	0.0574512	0.0606952	0.057695	2mer	2	0.892206	0.0647405	0.0333488	0.924084	0.96453	0.745946	0	0
Er-Or-Kf-Sf_synthetic	5.05353	6.79068	6.82095	0.813739	1.48129	1.5825	4mer	4	5.05353	0.541887	1.58104	4.93294e-06	4.93294e-06	4.64254e-06	1	1
Er-Or-Kf-Sr_synthetic	5.1157	6.0032	6.20037	0.53718	0.697451	0.710968	4mer	4	5.1157	0.475541	1.40454	4.64254e-06	4.64254e-06	4.36855e-06	1	1
Er-Or-Kf_synthetic	2.54891	3.06543	3.00562	0.222594	0.428835	0.351098	3mer	3	2.54891	0.378457	0.556941	3.23063e-05	3.42914e-05	3.42914e-05	1	0
Er-Or-Kr-Sf_synthetic	4.82516	6.01681	5.7365	0.379125	0.473872	0.543636	4mer	4	4.82516	0.48072	1.33919	4.64254e-06	4.64254e-06	4.64254e-06	1	1
Er-Or-Kr-Sr_synthetic	4.63939	5.74446	5.56312	0.347546	0.585869	0.419678	4mer	4	4.63939	0.476661	1.27676	4.93294e-06	5.2407e-06	4.64254e-06	1	1
Er-Or-Kr_synthetic	2.59194	2.92102	3.10821	0.240333	0.289296	0.337577	3mer	3	2.59194	0.37071	0.554752	4.34515e-05	3.42914e-05	3.86144e-05	1	0
Er-Or-Sf-Kf_synthetic	5.09135	6.14463	5.89216	0.474766	0.48271	0.46309	4mer	4	5.09135	0.470821	1.38398	4.64254e-06	4.64254e-06	4.36855e-06	1	1
Er-Or-Sf-Kr_synthetic	4.30622	6.13176	7.90708	0.699563	1.50334	2.77466	4mer	4	4.30622	0.685037	1.70314	0.000301662	0.000301662	0.000249458	0	0
Er-Or-Sf_synthetic	1.19556	1.12338	1.18147	0.153328	0.14122	0.187266	3mer	3	1.19556	0.0744922	0.0514186	0.0197294	0.040176	0.0722047	0	0
Er-Or-Sr-Kf_synthetic	5.05059	6.10214	6.21655	0.268541	0.413403	0.461886	4mer	4	5.05059	0.485428	1.41549	4.64254e-06	4.64254e-06	3.86633e-06	1	1
Er-Or-Sr-Kr_synthetic	4.79456	6.76004	6.93332	0.733341	1.3016	1.92997	4mer	4	4.79456	0.57514	1.59207	1.99212e-05	1.76217e-05	1.87378e-05	1	0
Er-Or-Sr_synthetic	1.27635	1.40766	1.40609	0.075007	0.106501	0.121589	3mer	3	1.27635	0.150288	0.110748	0.000464631	0.000182733	0.000315774	0	0
Er-Or_synthetic	1.00805	1.10387	0.94116	0.056214	0.0744955	0.0440974	2mer	2	1.00805	0.0668212	0.0388899	0.0998957	0.0184299	0.398159	0	0
Er-Sf-Kf-Of_synthetic	5.10019	6.29253	6.64864	0.497225	0.830761	0.677192	4mer	4	5.10019	0.508387	1.49699	4.93294e-06	5.2407e-06	3.86633e-06	1	1
Er-Sf-Kf-Or_synthetic	5.79549	7.38621	8.34146	0.737804	0.507266	1.1922	4mer	4	5.79549	0.562663	1.88269	1.46407e-05	1.55765e-05	1.21446e-05	1	1
Er-Sf-Kf_synthetic	2.34161	2.69437	2.75342	0.13203	0.221597	0.177362	3mer	3	2.34161	0.349622	0.472664	3.42914e-05	3.6392e-05	3.42914e-05	1	0
Er-Sf-Kr-Of_synthetic	5.65331	6.80705	6.8783	0.645991	0.871041	1.02766	4mer	4	5.65331	0.491815	1.60525	4.36855e-06	4.93294e-06	0.000383506	0	0
Er-Sf-Kr-Or_synthetic	7.77777	7.27108	5.71854	2.39006	1.22479	0.903697	4mer	4	7.77777	0.397043	1.78292	1.37588e-05	1.55765e-05	1.76217e-05	1	0
Er-Sf-Kr_synthetic	2.47549	3.56018	2.94154	0.246259	0.19749	0.249644	3mer	3	2.47549	0.440633	0.629763	0.000127844	9.43549e-05	0.000106611	0	0
Er-Sf-Of-Kf_synthetic	7.03387	8.67296	8.58933	0.579646	0.614507	0.820654	4mer	4	7.03387	0.515863	2.09492	3.41972e-06	3.86633e-06	3.02282e-06	1	1
Er-Sf-Of-Kr_synthetic	8.31203	9.15587	9.03628	0.869308	0.556917	0.893269	4mer	4	8.31203	0.473418	2.27191	3.02282e-06	3.41972e-06	3.2154e-06	1	1
Er-Sf-Of_synthetic	1.11219	1.26077	1.29999	0.068253	0.0641124	0.0718756	3mer	3	1.11219	0.124332	0.0798367	0.00777246	0.000464631	0.000561548	0	0
Er-Sf-Or-Kf_synthetic	5.0387	6.43203	5.87167	0.391441	0.35326	0.371011	4mer	4	5.0387	0.487821	1.41912	4.64254e-06	4.64254e-06	4.1101e-06	1	1
Er-Sf-Or-Kr_synthetic	5.19176	6.47309	5.58151	0.866913	1.5299	1.15409	4mer	4	5.19176	0.46886	1.40539	0.000169435	3.04307e-05	8.69061e-05	0	0
Er-Sf-Or_synthetic	1.26962	1.28279	1.46291	0.082841	0.107056	0.16822	3mer	3	1.26962	0.150293	0.110167	0.00107818	0.00298792	0.00502897	0	0
Er-Sf_synthetic	1.00311	0.909206	0.938124	0.0349757	0.0472498	0.0507578	2mer	2	1.00311	0.0463661	0.0268527	0.0440286	0.449664	0.496667	0	0
Er-Sr-Kf-Of_synthetic	5.40848	6.58324	6.58147	0.734749	1.14074	0.865452	4mer	4	5.40848	0.490687	1.53221	4.64254e-06	7.07609e-06	4.36855e-06	1	1
Er-Sr-Kf-Or_synthetic	6.00696	7.86725	8.25021	0.365715	0.426321	0.700055	4mer	4	6.00696	0.555121	1.92523	1.55765e-05	1.55765e-05	1.14069e-05	1	1
Er-Sr-Kf_synthetic	2.61068	3.01415	3.41101	0.0959505	0.24743	0.254317	3mer	3	2.61068	0.405145	0.610665	7.97046e-06	1.00938e-05	8.45722e-06	1	1
Er-Sr-Kr-Of_synthetic	5.5387	7.35541	7.402	0.438946	0.957371	0.550174	4mer	4	5.5387	0.543524	1.73806	4.1101e-06	4.93294e-06	3.2154e-06	1	1
Er-Sr-Kr-Or_synthetic	5.54896	6.40472	6.94006	0.561705	0.682601	0.925433	4mer	4	5.54896	0.488416	1.56474	4.36855e-06	4.93294e-06	4.1101e-06	1	1
Er-Sr-Kr_synthetic	2.99519	3.33066	3.45176	0.14634	0.186202	0.181804	3mer	3	2.99519	0.38261	0.661637	7.51056e-06	7.97046e-06	7.51056e-06	1	1
Er-Sr-Of-Kf_synthetic	6.20273	7.57157	7.74776	0.485061	0.532317	0.823057	4mer	4	6.20273	0.509986	1.82634	3.41972e-06	4.1101e-06	3.41972e-06	1	1
Er-Sr-Of-Kr_synthetic	7.70269	9.12281	9.18333	0.485426	0.75272	0.583918	4mer	4	7.70269	0.505714	2.24899	1.21446e-05	1.29277e-05	1.14069e-05	1	1
Er-Sr-Of_synthetic	1.25319	1.23079	1.29898	0.0832534	0.0901414	0.111918	3mer	3	1.25319	0.106563	0.0771013	0.00116936	0.00189323	0.000561548	0	0
Er-Sr-Or-Kf_synthetic	4.22585	4.98775	4.90875	0.460746	0.574324	0.786717	4mer	4	4.22585	0.446069	1.08832	5.56679e-06	5.91226e-06	0.000464631	0	0
Er-Sr-Or-Kr_synthetic	4.09884	5.22165	4.17592	0.760577	0.63846	0.640843	4mer	4	4.09884	0.444715	1.0524	8.34378e-05	7.84379e-05	8.87379e-05	0	0
Er-Sr-Or_synthetic	1.30677	1.38021	1.45003	0.059631	0.0506558	0.0922329	3mer	3	1.30677	0.151765	0.114502	0.000274922	0.000199417	0.000339347	0	0
Er-Sr_synthetic	1.07386	1.01713	1.01226	0.0435769	0.0980468	0.0843642	2mer	2	1.07386	0.0305754	0.0189566	0.00968818	0.128002	0.153731	0	0
Kf-Ef-Of-Sf_synthetic	2.92173	3.75969	3.38822	0.233561	0.275072	0.236591	4mer	4	2.92173	0.420003	0.708487	8.45722e-06	7.51056e-06	8.97231e-06	1	1
Kf-Ef-Of-Sr_synthetic	3.16405	3.87443	3.60454	0.261635	0.333893	0.276235	4mer	4	3.16405	0.413095	0.754627	8.45722e-06	7.51056e-06	8.45722e-06	1	1
Kf-Ef-Of_synthetic	1.94902	2.43103	2.17676	0.10045	0.152031	0.137619	3mer	3	1.94902	0.32049	0.360637	1.80209e-05	1.27512e-05	1.70179e-05	1	0
Kf-Ef-Or-Sf_synthetic	3.70476	4.32945	4.23631	0.218049	0.29987	0.287914	4mer	4	3.70476	0.423617	0.906092	6.66573e-06	5.91226e-06	6.66573e-06	1	1
Kf-Ef-Or-Sr_synthetic	4.00477	4.74404	4.77792	0.304321	0.422188	0.333794	4mer	4	4.00477	0.447056	1.03366	1.99212e-05	2.11754e-05	1.99212e-05	1	0
Kf-Ef-Or_synthetic	3.24226	3.77395	3.94966	0.108313	0.354819	0.314179	3mer	3	3.24226	0.419856	0.785936	7.51056e-06	7.07609e-06	7.97046e-06	1	1
Kf-Ef-Sf-Of_synthetic	3.69794	4.37963	4.33375	0.376294	0.57683	0.622118	4mer	4	3.69794	0.432432	0.923245	7.07609e-06	7.51056e-06	7.07609e-06	1	1
Kf-Ef-Sf-Or_synthetic	4.31849	5.7249	5.14408	0.30854	0.407331	0.339184	4mer	4	4.31849	0.488972	1.21915	5.2407e-06	5.2407e-06	4.93294e-06	1	1
Kf-Ef-Sf_synthetic	2.18413	2.45467	2.6875	0.242428	0.319969	0.295863	3mer	3	2.18413	0.343302	0.432906	2.26247e-05	2.5327e-05	1.35131e-05	1	1
Kf-Ef-Sr-Of_synthetic	3.7197	4.73372	4.52867	0.308437	0.401366	0.362581	4mer	4	3.7197	0.462486	0.993222	6.27818e-06	6.27818e-06	6.66573e-06	1	1
Kf-Ef-Sr-Or_synthetic	3.43127	4.20048	4.69927	0.597121	0.618644	0.33526	4mer	4	3.43127	0.478045	0.947028	0.00249803	0.000978666	1.87378e-05	1	0
Kf-Ef-Sr_synthetic	2.1432	2.30626	2.17656	0.202807	0.165178	0.325386	3mer	3	2.1432	0.283883	0.35127	1.51693e-05	1.908e-05	0.00127816	0	0
Kf-Ef_synthetic	1.59903	1.93078	1.95207	0.0887833	0.112955	0.192984	2mer	2	1.59903	0.277736	0.256406	0.000102938	6.53078e-05	0.000108876	0	0
Kf-Er-Of-Sf_synthetic	2.74988	3.62945	3.54049	0.183849	0.21856	0.245685	4mer	4	2.74988	0.443357	0.703894	9.5173e-06	7.51056e-06	7.51056e-06	1	1
Kf-Er-Of-Sr_synthetic	3.59502	4.04194	3.99933	0.188361	0.308949	0.462491	4mer	4	3.59502	0.404282	0.839122	6.27818e-06	6.66573e-06	2.67906e-05	1	0
Kf-Er-Of_synthetic	1.90013	2.16141	2.377	0.113486	0.14838	0.140366	3mer	3	1.90013	0.318583	0.349499	1.80209e-05	1.908e-05	1.43184e-05	1	1
Kf-Er-Or-Sf_synthetic	3.45232	4.10395	4.18248	0.245885	0.280331	0.288746	4mer	4	3.45232	0.432397	0.861852	6.66573e-06	6.66573e-06	6.66573e-06	1	1
Kf-Er-Or-Sr_synthetic	3.32434	3.87052	4.05327	0.134996	0.0732728	0.175542	4mer	4	3.32434	0.423884	0.813564	7.51056e-06	7.97046e-06	7.07609e-06	1	1
Kf-Er-Or_synthetic	2.99276	3.7516	3.54193	0.209641	0.24825	0.319118	3mer	3	2.99276	0.419622	0.725052	3.04307e-05	2.54051e-05	2.86588e-05	1	0
Kf-Er-Sf-Of_synthetic	3.06487	3.76558	3.73393	0.121234	0.233556	0.258213	4mer	4	3.06487	0.424644	0.751409	7.97046e-06	6.66573e-06	7.51056e-06	1	1
Kf-Er-Sf-Or_synthetic	3.20246	3.90479	4.0947	0.326432	0.315994	0.661664	4mer	4	3.20246	0.443358	0.819744	7.51056e-06	6.66573e-06	0.000234853	0	0
Kf-Er-Sf_synthetic	2.85063	3.59698	3.76043	0.791972	1.07241	1.3008	3mer	3	2.85063	0.443737	0.730307	1.908e-05	1.20303e-05	1.35131e-05	1	1
Kf-Er-Sr-Of_synthetic	3.4539	4.05958	4.20533	0.100254	0.128066	0.206133	4mer	4	3.4539	0.43114	0.859741	7.51056e-06	7.07609e-06	7.07609e-06	1	1
Kf-Er-Sr-Or_synthetic	3.53412	4.01662	4.55309	0.340911	0.461837	0.323748	4mer	4	3.53412	0.445188	0.908373	2.25046e-05	2.69853e-05	2.11754e-05	1	0
Kf-Er-Sr_synthetic	2.31718	2.76622	2.50586	0.230454	0.285949	0.181018	3mer	3	2.31718	0.339517	0.454213	0.000246826	1.13485e-05	1.43184e-05	1	1
Kf-Er_synthetic	2.28821	2.44809	2.38867	0.429096	0.416486	0.313844	2mer	2	2.28821	0.301832	0.39875	1.80209e-05	1.70179e-05	1.60683e-05	1	0
Kf-Of-Ef-Sf_synthetic	3.53632	4.069	4.05746	0.207922	0.142666	0.255999	4mer	4	3.53632	0.414276	0.845826	6.66573e-06	6.66573e-06	6.66573e-06	1	1
Kf-Of-Ef-Sr_synthetic	3.01209	4.44627	4.15459	0.515025	0.389114	0.407362	4mer	4	3.01209	0.518983	0.902527	0.000246826	5.91226e-06	6.66573e-06	1	1
Kf-Of-Ef_synthetic	2.82203	3.36556	3.40228	0.349561	0.490423	0.458398	3mer	3	2.82203	0.400386	0.652348	3.23063e-05	3.23063e-05	2.69853e-05	1	0
Kf-Of-Er-Sf_synthetic	3.35204	3.99901	3.87188	0.127845	0.195088	0.154025	4mer	4	3.35204	0.417291	0.807583	7.07609e-06	7.07609e-06	7.51056e-06	1	1
Kf-Of-Er-Sr_synthetic	3.749	4.40762	4.91633	0.115791	0.188622	0.219109	4mer	4	3.749	0.465594	1.00777	6.66573e-06	6.27818e-06	5.56679e-06	1	1
Kf-Of-Er_synthetic	2.87298	3.44396	3.61288	0.204278	0.182942	0.265345	3mer	3	2.87298	0.416839	0.691418	7.97046e-06	7.97046e-06	7.97046e-06	1	1
Kf-Of-Sf-Ef_synthetic	4.58079	5.57845	5.64369	0.22167	0.264703	0.476613	4mer	4	4.58079	0.477769	1.26357	5.2407e-06	5.2407e-06	4.36855e-06	1	1
Kf-Of-Sf-Er_synthetic	4.69593	5.25903	5.62632	0.210201	0.296441	0.168944	4mer	4	4.69593	0.453904	1.23062	4.93294e-06	5.2407e-06	4.64254e-06	1	1
Kf-Of-Sf_synthetic	1.28848	1.44869	1.37723	0.0689922	0.049323	0.0461596	3mer	3	1.28848	0.152859	0.113712	0.000804648	0.000151861	0.000222102	0	0
Kf-Of-Sr-Ef_synthetic	4.97828	6.55808	6.88725	0.406479	0.733604	0.844506	4mer	4	4.97828	0.542811	1.56016	4.64254e-06	4.93294e-06	3.63646e-06	1	1
Kf-Of-Sr-Er_synthetic	5.07513	5.96841	6.17987	0.359056	0.540503	0.456526	4mer	4	5.07513	0.476527	1.39628	4.93294e-06	4.93294e-06	3.86633e-06	1	1
Kf-Of-Sr_synthetic	1.65179	1.73362	1.86728	0.124714	0.158129	0.152327	3mer	3	1.65179	0.233571	0.222747	4.91989e-05	6.80028e-05	2.99627e-05	1	0
Kf-Of_synthetic	1.20537	1.21798	0.981735	0.0602267	0.195119	0.0923611	2mer	2	1.20537	0.106029	0.0737876	0.00200391	0.0842841	0.386007	0	0
Kf-Or-Ef-Sf_synthetic	4.76767	5.62781	5.55359	0.341289	0.258667	0.532144	4mer	4	4.76767	0.45997	1.26612	4.93294e-06	4.93294e-06	4.64254e-06	1	1
Kf-Or-Ef-Sr_synthetic	4.14377	5.46615	5.56153	0.183816	0.315797	0.41223	4mer	4	4.14377	0.513846	1.22933	1.87378e-05	1.76217e-05	1.6569e-05	1	0
Kf-Or-Ef_synthetic	3.91143	4.58362	4.93756	0.195563	0.232632	0.409798	3mer	3	3.91143	0.457657	1.03351	2.11754e-05	1.99212e-05	1.76217e-05	1	0
Kf-Or-Er-Sf_synthetic	4.03228	4.53062	4.85043	0.299604	0.417877	0.452416	4mer	4	4.03228	0.438438	1.0207	5.56679e-06	6.27818e-06	5.91226e-06	1	1
Kf-Or-Er-Sr_synthetic	4.24125	5.18086	5.45366	0.420222	0.626822	0.382901	4mer	4	4.24125	0.482473	1.18143	6.66573e-06	5.91226e-06	4.93294e-06	1	1
Kf-Or-Er_synthetic	3.97028	4.82413	5.08836	0.307561	0.399354	0.439245	3mer	3	3.97028	0.472387	1.08282	1.87378e-05	1.99212e-05	1.76217e-05	1	0
Kf-Or-Sf-Ef_synthetic	6.49137	8.31809	8.26269	0.398756	0.555252	0.549605	4mer	4	6.49137	0.531668	1.99258	3.41972e-06	3.41972e-06	3.02282e-06	1	1
Kf-Or-Sf-Er_synthetic	7.69084	9.67888	9.46304	0.41455	0.535886	0.541283	4mer	4	7.69084	0.5293	2.35025	3.2154e-06	3.2154e-06	3.02282e-06	1	1
Kf-Or-Sf_synthetic	1.72604	2.09693	1.97821	0.140638	0.114722	0.0980771	3mer	3	1.72604	0.284936	0.283947	0.000464631	1.70179e-05	2.13787e-05	1	0
Kf-Or-Sr-Ef_synthetic	6.11142	7.69656	7.93081	0.560434	0.291046	0.669084	4mer	4	6.11142	0.527863	1.86253	3.86633e-06	4.36855e-06	3.2154e-06	1	1
Kf-Or-Sr-Er_synthetic	7.87858	10.1166	10.1619	0.560211	0.606333	0.705002	4mer	4	7.87858	0.54911	2.49774	3.02282e-06	3.02282e-06	3.02282e-06	1	1
Kf-Or-Sr_synthetic	2.36534	2.39599	2.40168	0.20143	0.0508543	0.125175	3mer	3	2.36534	0.293412	0.400691	1.20303e-05	1.27512e-05	1.35131e-05	1	1
Kf-Or_synthetic	1.63621	1.92896	1.97402	0.230051	0.205778	0.257993	2mer	2	1.63621	0.274363	0.259181	0.00206252	2.01982e-05	0.000115204	0	0
Kf-Sf-Ef-Of_synthetic	4.11865	5.6461	4.59782	0.737022	0.641152	0.604906	4mer	4	4.11865	0.485182	1.15371	0.000173709	6.27818e-06	5.91226e-06	1	1
Kf-Sf-Ef-Or_synthetic	4.20888	4.54722	5.32951	0.422638	0.43009	0.760843	4mer	4	4.20888	0.452917	1.10059	2.11754e-05	1.99212e-05	1.6569e-05	1	0
Kf-Sf-Ef_synthetic	2.98872	3.63024	3.55761	0.244938	0.314291	0.25728	3mer	3	2.98872	0.41155	0.710146	7.51056e-06	7.07609e-06	7.97046e-06	1	1
Kf-Sf-Er-Of_synthetic	4.48472	5.98187	5.62289	0.508319	0.493765	0.449188	4mer	4	4.48472	0.506835	1.31233	5.2407e-06	4.64254e-06	4.64254e-06	1	1
Kf-Sf-Er-Or_synthetic	4.72812	7.99609	5.09874	0.469821	2.42928	0.543433	4mer	4	4.72812	0.607045	1.6571	4.64254e-06	5.2407e-06	4.93294e-06	1	1
Kf-Sf-Er_synthetic	3.12283	3.52612	3.75912	0.196146	0.188087	0.297193	3mer	3	3.12283	0.404232	0.728817	7.51056e-06	7.51009e-06	7.51056e-06	1	1
Kf-Sf-Of-Ef_synthetic	8.13893	9.91563	10.3135	0.556757	0.662608	0.596807	4mer	4	8.13893	0.532308	2.50132	3.2154e-06	3.2154e-06	3.02282e-06	1	1
Kf-Sf-Of-Er_synthetic	6.99219	8.83923	8.81231	0.530777	0.785442	0.51796	4mer	4	6.99219	0.530508	2.14163	3.41972e-06	3.41972e-06	3.02282e-06	1	1
Kf-Sf-Of_synthetic	1.6123	1.97699	2.00564	0.09576	0.0730833	0.183306	3mer	3	1.6123	0.290323	0.27025	0.000108876	6.16476e-05	6.53078e-05	1	0
Kf-Sf-Or-Ef_synthetic	7.85195	8.83882	9.39013	0.605601	0.772882	0.287063	4mer	4	7.85195	0.496575	2.25114	1.14069e-05	1.21446e-05	1.14069e-05	1	1
Kf-Sf-Or-Er_synthetic	6.97419	8.58359	8.82863	0.406251	0.437399	0.385692	4mer	4	6.97419	0.524516	2.11199	3.2154e-06	3.41972e-06	3.02282e-06	1	1
Kf-Sf-Or_synthetic	2.35483	2.84214	2.74409	0.166889	0.215148	0.17197	3mer	3	2.35483	0.36095	0.490734	1.13485e-05	1.13485e-05	1.13485e-05	1	1
Kf-Sf_synthetic	1.16151	1.07766	1.29966	0.0861921	0.0469184	0.107773	2mer	2	1.16151	0.110398	0.0740328	0.00693574	0.0129945	0.00197621	0	0
Kf-Sr-Ef-Of_synthetic	5.27987	6.19697	6.0339	0.312221	0.524672	0.422341	4mer	4	5.27987	0.464259	1.41522	4.93294e-06	5.2407e-06	4.1101e-06	1	1
Kf-Sr-Ef-Or_synthetic	5.74952	7.0253	7.20566	0.621246	0.619535	0.886204	4mer	4	5.74952	0.504971	1.67625	4.36855e-06	4.64254e-06	4.1101e-06	1	1
Kf-Sr-Ef_synthetic	3.63326	4.57173	4.53434	0.182234	0.242674	0.285195	3mer	3	3.63326	0.46245	0.970065	6.27818e-06	5.91226e-06	6.27818e-06	1	1
Kf-Sr-Er-Of_synthetic	5.22696	6.39215	6.28629	0.397429	0.620764	0.576025	4mer	4	5.22696	0.485814	1.46608	4.64254e-06	4.93294e-06	3.63646e-06	1	1
Kf-Sr-Er-Or_synthetic	4.69249	6.13129	7.12592	0.465443	0.41232	0.720124	4mer	4	4.69249	0.572064	1.54984	4.93294e-06	4.93294e-06	3.63646e-06	1	1
Kf-Sr-Er_synthetic	3.75983	4.2153	3.95863	0.376551	0.348747	0.521541	3mer	3	3.75983	0.39911	0.866365	6.66573e-06	6.66573e-06	1.27512e-05	1	1
Kf-Sr-Of-Ef_synthetic	8.08558	10.767	10.3292	1.38658	1.84473	2.07286	4mer	4	8.08558	0.558888	2.60901	3.86633e-06	3.86633e-06	3.86633e-06	1	1
Kf-Sr-Of-Er_synthetic	8.83093	10.7253	10.3585	0.351973	0.38733	0.520872	4mer	4	8.83093	0.516389	2.63283	3.02282e-06	3.02282e-06	3.02282e-06	1	1
Kf-Sr-Of_synthetic	2.69774	3.11706	3.02971	0.537636	0.747704	0.711881	3mer	3	2.69774	0.36723	0.571976	3.6392e-05	3.42914e-05	4.34515e-05	1	0
Kf-Sr-Or-Ef_synthetic	7.45021	9.25843	9.37545	0.432205	0.809634	0.833523	4mer	4	7.45021	0.529783	2.2788	3.2154e-06	3.2154e-06	3.2154e-06	1	1
Kf-Sr-Or-Er_synthetic	5.1673	6.77175	6.66367	0.635272	0.73495	0.724495	4mer	4	5.1673	0.52282	1.55975	1.76217e-05	1.76217e-05	1.46407e-05	1	1
Kf-Sr-Or_synthetic	1.95634	2.3248	2.40216	0.198753	0.213214	0.160976	3mer	3	1.95634	0.329167	0.371792	0.000102938	4.34515e-05	4.60804e-05	1	0
Kf-Sr_synthetic	1.3438	1.42256	1.42169	0.0604763	0.15158	0.151166	2mer	2	1.3438	0.149889	0.11629	0.000103804	0.00354656	0.00277029	0	0
Kr-Ef-Of-Sf_synthetic	2.72628	3.36649	3.33541	0.16742	0.208433	0.221131	4mer	4	2.72628	0.407577	0.641533	8.97231e-06	7.97046e-06	8.45722e-06	1	1
Kr-Ef-Of-Sr_synthetic	2.56076	2.92627	3.01902	0.244548	0.377115	0.317269	4mer	4	2.56076	0.366593	0.541991	1.27512e-05	2.26247e-05	1.13485e-05	1	1
Kr-Ef-Of_synthetic	1.86498	2.18259	2.05243	0.0914694	0.128981	0.20351	3mer	3	1.86498	0.285718	0.307646	6.16476e-05	4.88597e-05	6.16476e-05	1	0
Kr-Ef-Or-Sf_synthetic	3.25974	3.97524	4.04005	0.20069	0.309951	0.296514	4mer	4	3.25974	0.436774	0.822013	7.07609e-06	7.07609e-06	6.66573e-06	1	1
Kr-Ef-Or-Sr_synthetic	3.57818	4.91045	4.56131	0.276622	0.243833	0.41573	4mer	4	3.57818	0.493941	1.02042	7.07609e-06	4.93294e-06	5.56679e-06	1	1
Kr-Ef-Or_synthetic	3.19789	3.23947	3.323	0.222885	0.235711	0.152563	3mer	3	3.19789	0.35271	0.651209	2.3913e-05	3.04307e-05	2.86588e-05	1	0
Kr-Ef-Sf-Of_synthetic	3.49465	4.20632	4.16906	0.277499	0.269834	0.240418	4mer	4	3.49465	0.433257	0.874156	7.07609e-06	6.66573e-06	6.66573e-06	1	1
Kr-Ef-Sf-Or_synthetic	3.74048	4.65296	4.56249	0.391214	0.539612	0.371004	4mer	4	3.74048	0.456985	0.986889	2.25046e-05	2.25046e-05	1.99212e-05	1	0
Kr-Ef-Sf_synthetic	2.22328	2.59581	2.45408	0.1562	0.153485	0.198016	3mer	3	2.22328	0.327694	0.420631	1.20303e-05	9.5173e-06	1.43184e-05	1	1
Kr-Ef-Sr-Of_synthetic	3.87982	4.57108	4.45513	0.203648	0.238787	0.21203	4mer	4	3.87982	0.432609	0.96905	6.27818e-06	6.27818e-06	6.66573e-06	1	1
Kr-Ef-Sr-Or_synthetic	3.72412	5.03153	5.38602	0.120893	0.450317	0.757354	4mer	4	3.72412	0.534282	1.14877	5.56679e-06	5.56679e-06	5.56679e-06	1	1
Kr-Ef-Sr_synthetic	2.34098	2.86265	2.76311	0.168118	0.287431	0.243018	3mer	3	2.34098	0.366565	0.495437	1.13485e-05	1.00938e-05	1.20303e-05	1	1
Kr-Ef_synthetic	1.86119	2.10086	2.06472	0.244516	0.285195	0.183158	2mer	2	1.86119	0.276907	0.297552	0.000212522	0.00020212	2.39396e-05	1	0
Kr-Er-Of-Sf_synthetic	2.70804	3.31383	3.09111	0.121616	0.260751	0.148222	4mer	4	2.70804	0.387402	0.605698	8.97231e-06	8.45722e-06	8.97231e-06	1	1
Kr-Er-Of-Sr_synthetic	3.23223	4.12581	4.17523	0.142434	0.180535	0.156934	4mer	4	3.23223	0.459983	0.858388	7.51056e-06	7.07609e-06	6.66573e-06	1	1
Kr-Er-Of_synthetic	2.08903	2.29505	2.33007	0.106064	0.201329	0.164012	3mer	3	2.08903	0.300662	0.362629	4.34515e-05	4.09653e-05	4.88597e-05	1	0
Kr-Er-Or-Sf_synthetic	3.16404	3.60187	3.92963	0.282421	0.375566	0.413005	4mer	4	3.16404	0.417308	0.762321	7.07609e-06	7.51056e-06	7.07609e-06	1	1
Kr-Er-Or-Sr_synthetic	3.49911	4.54905	4.15407	0.597608	0.670245	0.835878	4mer	4	3.49911	0.455445	0.920097	8.97231e-06	6.27818e-06	0.000300686	0	0
Kr-Er-Or_synthetic	2.60695	3.4963	3.05639	0.171511	0.376426	0.349609	3mer	3	2.60695	0.4177	0.628689	3.04307e-05	2.54051e-05	3.86144e-05	1	0
Kr-Er-Sf-Of_synthetic	3.13846	3.90848	3.77814	0.166533	0.261846	0.285707	4mer	4	3.13846	0.429157	0.777628	7.51056e-06	6.66573e-06	7.07609e-06	1	1
Kr-Er-Sf-Or_synthetic	4.07667	5.02532	4.86989	0.185516	0.283385	0.2939	4mer	4	4.07667	0.459994	1.08267	5.2407e-06	5.2407e-06	5.56679e-06	1	1
Kr-Er-Sf_synthetic	2.1521	2.2717	2.3286	0.109025	0.211218	0.175901	3mer	3	2.1521	0.292603	0.363564	1.27512e-05	1.43184e-05	1.51693e-05	1	1
Kr-Er-Sr-Of_synthetic	3.3849	4.18847	4.12023	0.228198	0.22243	0.333438	4mer	4	3.3849	0.441343	0.862506	7.07609e-06	6.27818e-06	7.07609e-06	1	1
Kr-Er-Sr-Or_synthetic	4.09006	4.96758	4.99513	0.193609	0.300257	0.302201	4mer	4	4.09006	0.461967	1.09089	5.56679e-06	5.56679e-06	4.93294e-06	1	1
Kr-Er-Sr_synthetic	2.71301	3.54508	3.50159	0.289562	0.202198	0.173001	3mer	3	2.71301	0.438533	0.686899	7.9783e-05	7.51056e-06	8.45722e-06	1	1
Kr-Er_synthetic	1.58214	2.06725	2.02488	0.214699	0.0565642	0.105902	2mer	2	1.58214	0.313991	0.286814	0.00547163	6.16476e-05	5.81823e-05	1	0
Kr-Of-Ef-Sf_synthetic	3.03543	3.50125	3.58505	0.278974	0.430519	0.26487	4mer	4	3.03543	0.399064	0.699361	1.00938e-05	9.85115e-05	8.45722e-06	1	1
Kr-Of-Ef-Sr_synthetic	3.50055	4.48033	4.24874	0.285539	0.334278	0.395492	4mer	4	3.50055	0.45538	0.920343	7.07609e-06	6.27818e-06	6.66573e-06	1	1
Kr-Of-Ef_synthetic	2.90443	3.06968	3.36634	0.187413	0.147159	0.0730292	3mer	3	2.90443	0.36974	0.620007	8.97231e-06	8.97231e-06	7.97046e-06	1	1
Kr-Of-Er-Sf_synthetic	3.3981	3.78869	4.01103	0.343832	0.491757	0.438429	4mer	4	3.3981	0.408933	0.802283	7.51056e-06	8.45722e-06	7.51056e-06	1	1
Kr-Of-Er-Sr_synthetic	3.22384	4.25043	3.82771	0.384568	0.454265	0.58646	4mer	4	3.22384	0.448648	0.835063	1.20303e-05	6.27818e-06	0.00033157	0	0
Kr-Of-Er_synthetic	2.62	3.14188	3.03604	0.22365	0.243205	0.207368	3mer	3	2.62	0.378712	0.572862	1.00938e-05	1.00938e-05	1.00938e-05	1	1
Kr-Of-Sf-Ef_synthetic	3.74311	4.82229	5.01298	0.596266	0.763205	0.490035	4mer	4	3.74311	0.494134	1.06787	0.000709168	2.26247e-05	5.2407e-06	1	1
Kr-Of-Sf-Er_synthetic	4.21924	5.33625	5.0261	0.281304	0.299025	0.351365	4mer	4	4.21924	0.470903	1.14711	1.99212e-05	1.87378e-05	1.99212e-05	1	0
Kr-Of-Sf_synthetic	1.34269	1.51537	1.48175	0.106758	0.124131	0.129051	3mer	3	1.34269	0.175379	0.135954	0.00139624	0.00013454	0.00116936	0	0
Kr-Of-Sr-Ef_synthetic	4.49333	5.31539	5.62096	0.572847	0.888667	0.986769	4mer	4	4.49333	0.473065	1.22724	6.27818e-06	6.27818e-06	5.56679e-06	1	1
Kr-Of-Sr-Er_synthetic	5.29666	7.03953	7.01408	0.411036	0.573461	0.59303	4mer	4	5.29666	0.537036	1.64227	4.36855e-06	4.1101e-06	3.86633e-06	1	1
Kr-Of-Sr_synthetic	1.76936	2.06399	1.82127	0.0393454	0.0719141	0.142956	3mer	3	1.76936	0.260373	0.265983	2.39396e-05	2.01982e-05	9.34744e-05	0	0
Kr-Of_synthetic	1.32529	1.13286	1.28383	0.228322	0.133394	0.0864727	2mer	2	1.32529	0.112249	0.0858878	0.00181384	0.0426527	0.000567385	0	0
Kr-Or-Ef-Sf_synthetic	4.3359	5.30882	5.62843	0.193813	0.260698	0.240502	4mer	4	4.3359	0.488501	1.22288	5.2407e-06	5.2407e-06	4.1101e-06	1	1
Kr-Or-Ef-Sr_synthetic	3.66602	4.05689	4.53314	0.233473	0.25144	0.312106	4mer	4	3.66602	0.431776	0.913886	1.99212e-05	2.25046e-05	2.25046e-05	1	0
Kr-Or-Ef_synthetic	3.48307	4.58262	4.49122	0.176679	0.601513	0.443063	3mer	3	3.48307	0.47915	0.963545	2.3913e-05	2.11754e-05	2.11754e-05	1	0
Kr-Or-Er-Sf_synthetic	3.61285	4.40284	4.86088	0.366309	0.433819	0.457654	4mer	4	3.61285	0.47744	0.995883	6.66573e-06	6.27818e-06	5.2407e-06	1	1
Kr-Or-Er-Sr_synthetic	5.00301	6.10672	6.4632	0.226355	0.364994	0.413082	4mer	4	5.00301	0.501119	1.44748	5.2407e-06	4.93294e-06	3.63646e-06	1	1
Kr-Or-Er_synthetic	3.55564	4.25832	4.26185	0.151245	0.235974	0.298138	3mer	3	3.55564	0.43555	0.894118	6.66573e-06	6.66573e-06	6.27818e-06	1	1
Kr-Or-Sf-Ef_synthetic	5.71366	7.38707	7.32908	0.51696	0.739933	0.706081	4mer	4	5.71366	0.526232	1.73593	4.36855e-06	4.64254e-06	3.41972e-06	1	1
Kr-Or-Sf-Er_synthetic	6.09574	7.62741	7.41075	0.269913	0.26035	0.313775	4mer	4	6.09574	0.508086	1.78815	3.63646e-06	4.36855e-06	3.02282e-06	1	1
Kr-Or-Sf_synthetic	1.63111	1.86844	1.84899	0.137142	0.192145	0.205768	3mer	3	1.63111	0.248874	0.23437	5.48378e-05	2.99627e-05	7.17334e-05	1	0
Kr-Or-Sr-Ef_synthetic	6.13297	7.69291	7.65832	0.369157	0.65464	0.610537	4mer	4	6.13297	0.516128	1.82754	3.86633e-06	4.1101e-06	3.2154e-06	1	1
Kr-Or-Sr-Er_synthetic	7.20423	8.95473	9.12052	0.26534	0.313459	0.282609	4mer	4	7.20423	0.529286	2.2015	3.02282e-06	3.2154e-06	3.02282e-06	1	1
Kr-Or-Sr_synthetic	2.02667	2.39321	2.45005	0.10778	0.173742	0.145634	3mer	3	2.02667	0.331442	0.387821	1.43184e-05	1.43184e-05	1.35131e-05	1	1
Kr-Or_synthetic	1.60695	1.84887	2.0239	0.179484	0.115435	0.179486	2mer	2	1.60695	0.278319	0.258217	0.00498346	0.000217983	0.000217983	0	0
Kr-Sf-Ef-Of_synthetic	5.58671	5.44276	5.03604	0.55773	0.493711	0.515353	4mer	4	5.58671	0.392008	1.26442	1.46407e-05	1.99212e-05	1.87378e-05	1	0
Kr-Sf-Ef-Or_synthetic	3.93958	4.89467	4.21999	0.718079	1.08319	0.715784	4mer	4	3.93958	0.437351	0.994763	2.54051e-05	2.3913e-05	2.69853e-05	1	0
Kr-Sf-Ef_synthetic	2.87238	3.43513	3.12512	0.242634	0.449455	0.478169	3mer	3	2.87238	0.381749	0.63308	9.5173e-06	9.5173e-06	1.35131e-05	1	1
Kr-Sf-Er-Of_synthetic	3.70387	4.81825	4.86567	0.272821	0.691945	0.453528	4mer	4	3.70387	0.489387	1.04652	2.25046e-05	1.99212e-05	1.87378e-05	1	0
Kr-Sf-Er-Or_synthetic	5.32913	6.82341	6.74051	0.658842	0.910789	0.999689	4mer	4	5.32913	0.513434	1.57972	1.55765e-05	1.76217e-05	1.46407e-05	1	1
Kr-Sf-Er_synthetic	2.66155	2.98719	3.35493	0.178965	0.481195	0.272577	3mer	3	2.66155	0.390722	0.600403	3.04307e-05	0.00285785	3.04307e-05	1	0
Kr-Sf-Of-Ef_synthetic	8.22022	11.0986	10.931	0.815943	0.835644	0.739462	4mer	4	8.22022	0.575332	2.73049	3.41972e-06	3.2154e-06	3.02282e-06	1	1
Kr-Sf-Of-Er_synthetic	7.35509	9.47544	9.15721	0.595661	0.756029	0.726024	4mer	4	7.35509	0.536146	2.27672	3.2154e-06	3.2154e-06	3.2154e-06	1	1
Kr-Sf-Of_synthetic	1.81376	2.01076	2.06676	0.0776533	0.135271	0.126701	3mer	3	1.81376	0.272332	0.28518	2.13787e-05	2.01982e-05	2.01982e-05	1	0
Kr-Sf-Or-Ef_synthetic	6.21821	8.19355	7.97862	0.259261	0.561331	0.296508	4mer	4	6.21821	0.538851	1.93452	4.1101e-06	4.1101e-06	3.02282e-06	1	1
Kr-Sf-Or-Er_synthetic	6.0287	7.44983	7.88728	0.443786	0.736155	0.775434	4mer	4	6.0287	0.524511	1.82565	1.46407e-05	1.46407e-05	1.21446e-05	1	1
Kr-Sf-Or_synthetic	2.14578	2.31904	2.34943	0.226558	0.252637	0.253576	3mer	3	2.14578	0.299195	0.370662	0.000217983	0.000172318	0.000172318	0	0
Kr-Sf_synthetic	1.29081	1.13081	1.1617	0.0762423	0.158465	0.134754	2mer	2	1.29081	0.0924927	0.0689299	0.000223425	0.0427111	0.0591921	0	0
Kr-Sr-Ef-Of_synthetic	5.05872	5.85045	6.52257	0.572985	0.802353	0.869915	4mer	4	5.05872	0.489961	1.43101	5.56679e-06	5.91226e-06	4.36855e-06	1	1
Kr-Sr-Ef-Or_synthetic	5.17314	6.57603	6.73011	0.692721	1.04755	0.479443	4mer	4	5.17314	0.516763	1.54342	5.56679e-06	5.56679e-06	3.41972e-06	1	1
Kr-Sr-Ef_synthetic	3.97785	4.77362	4.4746	0.317317	0.319714	0.292074	3mer	3	3.97785	0.43633	1.00208	5.91226e-06	5.56679e-06	6.27818e-06	1	1
Kr-Sr-Er-Of_synthetic	4.94512	6.0467	6.33736	0.356801	0.498479	0.581053	4mer	4	4.94512	0.497932	1.42163	1.87378e-05	1.87378e-05	1.37588e-05	1	1
Kr-Sr-Er-Or_synthetic	5.24146	6.18188	6.05135	0.680982	0.624729	0.740961	4mer	4	5.24146	0.467055	1.41338	1.6569e-05	1.6569e-05	1.6569e-05	1	0
Kr-Sr-Er_synthetic	3.56427	4.28054	4.29194	0.109076	0.198016	0.150737	3mer	3	3.56427	0.43778	0.900879	6.66573e-06	6.27818e-06	6.66573e-06	1	1
Kr-Sr-Of-Ef_synthetic	9.29679	11.4079	10.9219	0.296113	0.224186	0.455518	4mer	4	9.29679	0.522304	2.80347	3.02282e-06	3.02282e-06	3.02282e-06	1	1
Kr-Sr-Of-Er_synthetic	9.35413	11.71	11.9797	0.811847	1.2392	1.01777	4mer	4	9.35413	0.54995	2.97006	3.02282e-06	3.2154e-06	3.02282e-06	1	1
Kr-Sr-Of_synthetic	1.87245	2.03754	2.0808	0.209987	0.227181	0.173209	3mer	3	1.87245	0.270493	0.292419	9.19679e-05	7.75617e-05	6.53078e-05	1	0
Kr-Sr-Or-Ef_synthetic	6.29245	7.52144	7.47114	0.770322	1.01267	0.990032	4mer	4	6.29245	0.492648	1.78976	3.86633e-06	4.64254e-06	3.86633e-06	1	1
Kr-Sr-Or-Er_synthetic	5.51334	6.79316	6.87228	0.293969	0.517901	0.481242	4mer	4	5.51334	0.501956	1.59779	1.55765e-05	1.55765e-05	1.21446e-05	1	1
Kr-Sr-Or_synthetic	2.14251	2.22109	2.67411	0.295248	0.232627	0.400409	3mer	3	2.14251	0.332586	0.411401	0.00106918	1.908e-05	0.00111823	0	0
Kr-Sr_synthetic	1.41155	1.52345	1.47776	0.104509	0.111968	0.124841	2mer	2	1.41155	0.169955	0.138506	9.85115e-05	5.48378e-05	0.000246826	0	0
Of-Ef-Kf-Sf_synthetic	2.72615	3.27974	2.95874	0.0971797	0.169545	0.132421	4mer	4	2.72615	0.374038	0.588715	8.45722e-06	8.97231e-06	9.5173e-06	1	1
Of-Ef-Kf-Sr_synthetic	3.83393	4.7673	4.49486	0.263657	0.25528	0.320382	4mer	4	3.83393	0.450638	0.997497	5.91226e-06	5.56679e-06	5.91226e-06	1	1
Of-Ef-Kf_synthetic	1.80429	2.00405	2.40611	0.162386	0.215934	0.203146	3mer	3	1.80429	0.327729	0.341398	0.000149087	0.000127778	1.51693e-05	1	1
Of-Ef-Kr-Sf_synthetic	3.05141	3.75737	3.44642	0.068641	0.149336	0.165958	4mer	4	3.05141	0.407428	0.717778	7.97046e-06	7.51056e-06	8.45722e-06	1	1
Of-Ef-Kr-Sr_synthetic	3.32129	4.01633	4.0663	0.158344	0.26784	0.270994	4mer	4	3.32129	0.433969	0.832157	7.07609e-06	7.07609e-06	7.51056e-06	1	1
Of-Ef-Kr_synthetic	1.92453	2.41896	2.61243	0.329548	0.143504	0.165371	3mer	3	1.92453	0.37419	0.415773	0.00454345	0.000135766	0.000127844	0	0
Of-Ef-Sf-Kf_synthetic	3.13118	3.81573	3.70761	0.153578	0.194097	0.191873	4mer	4	3.13118	0.418584	0.756712	7.51056e-06	7.51056e-06	7.51056e-06	1	1
Of-Ef-Sf-Kr_synthetic	4.57231	4.83124	4.59234	0.733407	0.206589	0.279541	4mer	4	4.57231	0.401639	1.06026	6.92755e-05	6.92755e-05	7.84379e-05	1	0
Of-Ef-Sf_synthetic	1.14914	1.03508	1.20544	0.0336819	0.0594542	0.0848318	3mer	3	1.14914	0.0836509	0.0554988	0.000588561	0.0440286	0.00326819	0	0
Of-Ef-Sr-Kf_synthetic	3.04498	3.9119	3.71102	0.272407	0.391164	0.334626	4mer	4	3.04498	0.436985	0.768227	8.45722e-06	7.51056e-06	7.97046e-06	1	1
Of-Ef-Sr-Kr_synthetic	3.4502	4.06301	3.4909	0.212893	0.396946	0.498688	4mer	4	3.4502	0.395062	0.786952	6.27818e-06	7.51056e-06	2.83345e-05	1	0
Of-Ef-Sr_synthetic	1.60956	1.25637	1.39965	0.297641	0.164331	0.223982	3mer	3	1.60956	0.159041	0.147793	0.000588561	0.0104626	0.0031366	0	0
Of-Ef_synthetic	1.05403	1.085	1.16151	0.0809628	0.121874	0.0863359	2mer	2	1.05403	0.0639931	0.0389425	0.0663663	0.094767	0.00618083	0	0
Of-Er-Kf-Sf_synthetic	3.08193	3.5194	3.5506	0.204238	0.277618	0.315754	4mer	4	3.08193	0.392948	0.699193	8.97231e-06	8.45722e-06	9.5173e-06	1	1
Of-Er-Kf-Sr_synthetic	3.88627	4.36001	4.401	0.266594	0.205054	0.332121	4mer	4	3.88627	0.418077	0.938055	5.91226e-06	5.91226e-06	6.27818e-06	1	1
Of-Er-Kf_synthetic	1.84742	2.18449	2.34113	0.175848	0.217004	0.275111	3mer	3	1.84742	0.324087	0.345674	2.39396e-05	1.70179e-05	1.70179e-05	1	0
Of-Er-Kr-Sf_synthetic	3.49636	4.05955	4.28659	0.177926	0.204718	0.304057	4mer	4	3.49636	0.432086	0.872219	6.66573e-06	6.66573e-06	7.07609e-06	1	1
Of-Er-Kr-Sr_synthetic	4.00547	5.37843	4.93104	0.244479	0.49033	0.427938	4mer	4	4.00547	0.491973	1.13772	6.27818e-06	5.2407e-06	4.93294e-06	1	1
Of-Er-Kr_synthetic	2.51609	2.77134	2.68022	0.161121	0.253444	0.153107	3mer	3	2.51609	0.331725	0.481886	1.07036e-05	1.13485e-05	1.13485e-05	1	1
Of-Er-Sf-Kf_synthetic	2.71709	2.98283	3.14841	0.210066	0.328552	0.256053	4mer	4	2.71709	0.364647	0.572027	9.5173e-06	1.07036e-05	1.07036e-05	1	1
Of-Er-Sf-Kr_synthetic	3.3423	4.7853	4.28537	0.372761	0.477018	0.520785	4mer	4	3.3423	0.502361	0.969394	7.51056e-06	6.27818e-06	6.66573e-06	1	1
Of-Er-Sf_synthetic	1.1236	1.21551	1.17009	0.148602	0.198445	0.118555	3mer	3	1.1236	0.0825852	0.0535738	0.105243	0.0233336	0.0100862	0	0
Of-Er-Sr-Kf_synthetic	3.71216	4.15171	3.741	0.234768	0.211588	0.240441	4mer	4	3.71216	0.390104	0.836076	7.07609e-06	6.66573e-06	8.97231e-06	1	1
Of-Er-Sr-Kr_synthetic	3.34112	4.76235	4.62928	0.270174	0.600573	0.257646	4mer	4	3.34112	0.522026	1.00699	2.3913e-05	2.25046e-05	2.11754e-05	1	0
Of-Er-Sr_synthetic	1.14744	1.1386	1.21684	0.10681	0.113688	0.1026	3mer	3	1.14744	0.0791514	0.0524358	0.0427111	0.0284015	0.00288781	0	0
Of-Er_synthetic	2.1467	2.61417	2.55341	1.04794	1.49414	1.37731	2mer	2	2.1467	0.348628	0.432088	0.00793044	0.00594916	0.00825724	0	0
Of-Kf-Ef-Sf_synthetic	3.99099	5.11871	4.66217	0.241575	0.427885	0.336532	4mer	4	3.99099	0.46457	1.07046	5.91226e-06	5.91226e-06	5.56679e-06	1	1
Of-Kf-Ef-Sr_synthetic	3.99226	4.96865	4.74223	0.264395	0.419107	0.509222	4mer	4	3.99226	0.45889	1.05771	6.66573e-06	5.56679e-06	6.27818e-06	1	1
Of-Kf-Ef_synthetic	3.05981	3.42673	3.52279	0.183635	0.364497	0.262816	3mer	3	3.05981	0.387323	0.684238	7.51056e-06	8.97231e-06	8.45722e-06	1	1
Of-Kf-Er-Sf_synthetic	3.72715	4.56009	4.55658	0.200698	0.197807	0.209927	4mer	4	3.72715	0.452565	0.973862	6.27818e-06	5.56679e-06	5.91226e-06	1	1
Of-Kf-Er-Sr_synthetic	3.88615	5.23017	5.01186	0.234275	0.315249	0.24525	4mer	4	3.88615	0.500739	1.12349	6.27818e-06	5.2407e-06	5.2407e-06	1	1
Of-Kf-Er_synthetic	2.94519	3.33263	3.32425	0.256349	0.310303	0.377306	3mer	3	2.94519	0.378612	0.643795	9.5173e-06	1.00938e-05	1.00938e-05	1	1
Of-Kf-Sf-Ef_synthetic	4.62546	6.42943	5.82942	0.577683	0.522799	0.747653	4mer	4	4.62546	0.525913	1.40446	9.5173e-06	4.64254e-06	4.93294e-06	1	1
Of-Kf-Sf-Er_synthetic	5.70606	8.46138	6.84099	0.61037	1.07244	0.941794	4mer	4	5.70606	0.562088	1.85174	4.64254e-06	3.86633e-06	0.000156904	0	0
Of-Kf-Sf_synthetic	1.82913	1.81244	1.89049	0.101257	0.134213	0.183129	3mer	3	1.82913	0.231445	0.244417	2.26247e-05	3.16796e-05	2.83345e-05	1	0
Of-Kf-Sr-Ef_synthetic	6.02536	8.00981	8.48262	0.243657	0.430731	0.525335	4mer	4	6.02536	0.568054	1.97611	3.86633e-06	4.1101e-06	3.2154e-06	1	1
Of-Kf-Sr-Er_synthetic	5.46367	7.17168	6.64627	0.652272	1.09112	0.807373	4mer	4	5.46367	0.513581	1.62007	4.93294e-06	4.64254e-06	3.86633e-06	1	1
Of-Kf-Sr_synthetic	1.87091	2.20045	2.39846	0.111345	0.175943	0.178365	3mer	3	1.87091	0.330259	0.356736	2.13787e-05	1.70179e-05	1.43184e-05	1	1
Of-Kf_synthetic	1.28796	1.46877	1.32255	0.100776	0.0901479	0.0841125	2mer	2	1.28796	0.15234	0.11328	0.000510952	7.5657e-05	0.000588561	0	0
Of-Kr-Ef-Sf_synthetic	4.15651	4.47512	4.5302	0.20087	0.286813	0.592643	4mer	4	4.15651	0.409389	0.982437	5.56679e-06	6.27818e-06	7.97046e-06	1	1
Of-Kr-Ef-Sr_synthetic	4.18438	5.65661	4.9338	0.250488	0.26066	0.533997	4mer	4	4.18438	0.490503	1.18498	1.99212e-05	1.76217e-05	1.76217e-05	1	0
Of-Kr-Ef_synthetic	3.18321	3.4366	4.55348	0.179801	0.15818	0.214013	3mer	3	3.18321	0.467014	0.858292	7.07609e-06	8.97231e-06	5.91226e-06	1	1
Of-Kr-Er-Sf_synthetic	4.29243	5.4102	5.31475	0.544563	0.65914	0.639839	4mer	4	4.29243	0.481267	1.19269	5.56679e-06	5.2407e-06	5.2407e-06	1	1
Of-Kr-Er-Sr_synthetic	3.92887	4.53855	4.61665	0.330755	0.376041	0.491178	4mer	4	3.92887	0.434876	0.986444	5.91226e-06	6.27818e-06	5.56679e-06	1	1
Of-Kr-Er_synthetic	3.10113	4.02541	3.70316	0.273308	0.377749	0.451589	3mer	3	3.10113	0.438553	0.785202	2.3913e-05	2.3913e-05	2.69853e-05	1	0
Of-Kr-Sf-Ef_synthetic	4.73386	6.21607	6.30648	0.644061	0.616539	0.621666	4mer	4	4.73386	0.524529	1.43359	2.3913e-05	1.76217e-05	1.37588e-05	1	1
Of-Kr-Sf-Er_synthetic	4.93865	5.7004	6.03172	0.693577	0.661671	0.875752	4mer	4	4.93865	0.470567	1.34174	5.56679e-06	4.93294e-06	4.36855e-06	1	1
Of-Kr-Sf_synthetic	1.71492	2.11636	2.0144	0.122216	0.187152	0.055114	3mer	3	1.71492	0.293864	0.290956	6.80028e-05	1.908e-05	2.01982e-05	1	0
Of-Kr-Sr-Ef_synthetic	6.12275	8.08905	7.68753	1.11749	1.41793	1.14816	4mer	4	6.12275	0.532785	1.88338	6.11322e-05	6.11322e-05	5.3901e-05	1	0
Of-Kr-Sr-Er_synthetic	5.25053	6.92398	7.35778	0.45665	0.461128	0.526355	4mer	4	5.25053	0.552575	1.67507	1.6569e-05	1.6569e-05	1.29277e-05	1	1
Of-Kr-Sr_synthetic	1.99885	2.28436	2.40023	0.159843	0.230067	0.178905	3mer	3	1.99885	0.318512	0.367574	2.13787e-05	1.908e-05	1.43184e-05	1	1
Of-Kr_synthetic	1.48131	1.55849	1.47772	0.173459	0.225988	0.19257	2mer	2	1.48131	0.172583	0.147599	0.000596735	0.00673606	0.00228171	0	0
Of-Sf-Ef-Kf_synthetic	3.29588	3.85533	3.95501	0.133824	0.320411	0.324938	4mer	4	3.29588	0.41926	0.797799	7.07609e-06	7.97046e-06	7.51056e-06	1	1
Of-Sf-Ef-Kr_synthetic	3.38628	4.6013	5.53261	0.412157	0.443707	0.90169	4mer	4	3.38628	0.579179	1.13234	9.43549e-05	7.84379e-05	6.92755e-05	1	0
Of-Sf-Ef_synthetic	1.1346	1.21735	1.18817	0.0961497	0.0589025	0.0840179	3mer	3	1.1346	0.0848953	0.0556116	0.0233336	0.000933703	0.00469909	0	0
Of-Sf-Er-Kf_synthetic	3.00958	3.77092	3.60107	0.205426	0.206478	0.248819	4mer	4	3.00958	0.422917	0.734853	7.51056e-06	7.07609e-06	7.97046e-06	1	1
Of-Sf-Er-Kr_synthetic	3.5991	3.47906	3.7183	0.464584	0.559707	0.646836	4mer	4	3.5991	0.362056	0.752331	8.87379e-05	0.000100306	0.000106611	0	0
Of-Sf-Er_synthetic	1.23265	1.27856	1.26784	0.0726004	0.150495	0.114586	3mer	3	1.23265	0.106529	0.0758135	0.000561548	0.0190699	0.00936947	0	0
Of-Sf-Kf-Ef_synthetic	5.79605	7.52753	7.19654	0.272085	0.349921	0.522353	4mer	4	5.79605	0.520168	1.74066	3.41972e-06	4.36855e-06	3.41972e-06	1	1
Of-Sf-Kf-Er_synthetic	4.56465	5.9287	5.76223	0.440921	0.687944	0.597784	4mer	4	4.56465	0.501965	1.32288	1.87378e-05	1.87378e-05	1.55765e-05	1	1
Of-Sf-Kf_synthetic	1.41576	1.48651	1.67473	0.0765999	0.0738414	0.126428	3mer	3	1.41576	0.201057	0.164343	9.34744e-05	5.48378e-05	3.95278e-05	1	0
Of-Sf-Kr-Ef_synthetic	4.57825	5.2547	5.30378	0.508593	0.577119	0.781228	4mer	4	4.57825	0.447704	1.1834	7.07609e-06	5.56679e-06	5.56679e-06	1	1
Of-Sf-Kr-Er_synthetic	4.21175	4.93335	5.03859	0.588819	0.71712	0.807679	4mer	4	4.21175	0.451078	1.09687	6.66573e-06	1.35131e-05	6.27818e-06	1	1
Of-Sf-Kr_synthetic	1.74286	1.98645	2.20815	0.25918	0.268729	0.398672	3mer	3	1.74286	0.30132	0.303201	0.00249803	0.000102938	0.00130587	0	0
Of-Sf_synthetic	0.842532	0.815315	0.773885	0.0525245	0.075333	0.0381318	2mer	2	0.842532	0.117298	0.0570581	0.490604	0.552649	0.146009	0	0
Of-Sr-Ef-Kf_synthetic	4.13571	4.79694	5.16004	0.17051	0.319199	0.24676	4mer	4	4.13571	0.458636	1.09511	5.56679e-06	5.91226e-06	5.2407e-06	1	1
Of-Sr-Ef-Kr_synthetic	3.77056	4.44345	5.16523	0.207596	0.567006	0.435745	4mer	4	3.77056	0.483006	1.05147	2.25046e-05	2.11754e-05	1.76217e-05	1	0
Of-Sr-Ef_synthetic	1.36045	1.48791	1.55124	0.0939601	0.115446	0.138761	3mer	3	1.36045	0.181111	0.142255	0.000510952	0.000212522	0.000646252	0	0
Of-Sr-Er-Kf_synthetic	3.39006	4.21274	4.17613	0.368612	0.342777	0.329533	4mer	4	3.39006	0.445881	0.872703	8.45722e-06	6.27818e-06	6.66573e-06	1	1
Of-Sr-Er-Kr_synthetic	4.84953	5.68607	5.95587	0.417437	0.834903	0.805457	4mer	4	4.84953	0.473732	1.32639	6.11322e-05	6.50834e-05	6.11322e-05	1	0
Of-Sr-Er_synthetic	1.29551	1.3391	1.24408	0.0650526	0.116955	0.133877	3mer	3	1.29551	0.116949	0.0874738	0.000149087	0.000616779	0.00618083	0	0
Of-Sr-Kf-Ef_synthetic	7.60865	9.64814	9.90311	0.567791	0.725175	0.836211	4mer	4	7.60865	0.546156	2.39918	3.41972e-06	3.63646e-06	3.02282e-06	1	1
Of-Sr-Kf-Er_synthetic	5.44544	6.54018	6.947	0.393398	0.287227	0.442409	4mer	4	5.44544	0.501354	1.57622	4.1101e-06	4.93294e-06	3.41972e-06	1	1
Of-Sr-Kf_synthetic	1.79207	1.81266	1.88597	0.119131	0.159028	0.189769	3mer	3	1.79207	0.23273	0.240795	2.5327e-05	3.53977e-05	0.000141638	0	0
Of-Sr-Kr-Ef_synthetic	6.7799	8.7674	8.69501	0.40426	0.817786	0.42588	4mer	4	6.7799	0.539543	2.11198	3.2154e-06	3.63646e-06	3.02282e-06	1	1
Of-Sr-Kr-Er_synthetic	6.06956	7.42042	7.43716	0.553646	0.829503	0.711145	4mer	4	6.06956	0.503463	1.76426	1.37588e-05	1.55765e-05	1.29277e-05	1	1
Of-Sr-Kr_synthetic	2.07418	2.24987	2.19583	0.145195	0.256699	0.34618	3mer	3	2.07418	0.285042	0.341347	4.60804e-05	7.75617e-05	0.003564	0	0
Of-Sr_synthetic	0.859334	0.840266	0.893222	0.0722615	0.0491988	0.0783343	2mer	2	0.859334	0.0829818	0.0411703	0.521116	0.863812	0.913998	0	0
Or-Ef-Kf-Sf_synthetic	3.25589	4.28856	4.23182	0.309007	0.339721	0.287343	4mer	4	3.25589	0.472251	0.887732	8.45722e-06	6.27818e-06	6.66573e-06	1	1
Or-Ef-Kf-Sr_synthetic	5.13506	5.22093	5.53771	0.361458	0.57876	0.533233	4mer	4	5.13506	0.419842	1.24472	4.64254e-06	6.27818e-06	4.36855e-06	1	1
Or-Ef-Kf_synthetic	2.53778	2.90694	2.82706	0.26083	0.403442	0.33318	3mer	3	2.53778	0.351814	0.515474	3.04307e-05	3.86144e-05	4.34515e-05	1	0
Or-Ef-Kr-Sf_synthetic	4.11847	5.22519	4.91844	0.384201	0.317833	0.38342	4mer	4	4.11847	0.469623	1.11667	5.56679e-06	5.2407e-06	4.93294e-06	1	1
Or-Ef-Kr-Sr_synthetic	4.06241	4.78222	5.26217	0.405666	0.515693	0.519548	4mer	4	4.06241	0.471561	1.10601	5.91226e-06	5.91226e-06	4.93294e-06	1	1
Or-Ef-Kr_synthetic	3.16144	3.4982	3.14105	0.322136	0.373644	0.235679	3mer	3	3.16144	0.362246	0.661193	9.43549e-05	8.87379e-05	0.000100306	0	0
Or-Ef-Sf-Kf_synthetic	4.40292	5.8687	5.60482	0.359785	0.541216	0.561636	4mer	4	4.40292	0.508499	1.29262	5.2407e-06	5.2407e-06	4.36855e-06	1	1
Or-Ef-Sf-Kr_synthetic	5.33926	5.36596	5.80432	0.690279	0.903463	0.660184	4mer	4	5.33926	0.423591	1.30577	1.6569e-05	2.11754e-05	1.46407e-05	1	1
Or-Ef-Sf_synthetic	1.28723	1.38304	1.41053	0.106185	0.0865385	0.038665	3mer	3	1.28723	0.145837	0.108383	0.00173679	0.000121338	7.17334e-05	1	0
Or-Ef-Sr-Kf_synthetic	4.89497	6.28993	6.32754	0.353983	0.654231	0.547161	4mer	4	4.89497	0.512552	1.44853	4.36855e-06	4.93294e-06	3.86633e-06	1	1
Or-Ef-Sr-Kr_synthetic	5.81295	7.75262	7.45053	0.53765	0.972651	0.732663	4mer	4	5.81295	0.53695	1.80206	5.74089e-05	5.74089e-05	4.74853e-05	1	0
Or-Ef-Sr_synthetic	1.51239	1.674	1.53189	0.20489	0.232954	0.178968	3mer	3	1.51239	0.195254	0.170491	8.4121e-05	5.48378e-05	8.4121e-05	0	0
Or-Ef_synthetic	1.13212	1.10261	1.22461	0.0818343	0.118277	0.0995636	2mer	2	1.13212	0.0817334	0.0534235	0.00720519	0.0722047	0.00618083	0	0
Or-Er-Kf-Sf_synthetic	3.51179	4.24318	4.22608	0.15863	0.230335	0.213385	4mer	4	3.51179	0.437142	0.886321	6.27818e-06	5.56679e-06	6.66573e-06	1	1
Or-Er-Kf-Sr_synthetic	4.58081	5.44935	5.73415	0.314925	0.546016	0.518227	4mer	4	4.58081	0.476598	1.26047	5.2407e-06	5.2407e-06	4.1101e-06	1	1
Or-Er-Kf_synthetic	2.25397	2.462	2.57504	0.188049	0.176633	0.177915	3mer	3	2.25397	0.322731	0.41998	1.27512e-05	1.27512e-05	1.27512e-05	1	1
Or-Er-Kr-Sf_synthetic	5.23351	6.43746	6.7026	0.321905	0.62112	0.567672	4mer	4	5.23351	0.504596	1.52467	4.64254e-06	4.36855e-06	3.63646e-06	1	1
Or-Er-Kr-Sr_synthetic	4.98207	6.43937	6.81232	0.433481	0.587097	0.57121	4mer	4	4.98207	0.533701	1.53514	4.64254e-06	4.93294e-06	3.63646e-06	1	1
Or-Er-Kr_synthetic	2.72518	2.58572	2.61867	0.281557	0.508173	0.39583	3mer	3	2.72518	0.302273	0.475591	3.42914e-05	0.00298792	0.00118699	0	0
Or-Er-Sf-Kf_synthetic	3.85443	5.16145	5.01944	0.303112	0.298768	0.36041	4mer	4	3.85443	0.50077	1.11439	5.56679e-06	5.2407e-06	5.56679e-06	1	1
Or-Er-Sf-Kr_synthetic	5.42522	6.57853	5.88663	0.341748	0.239363	1.66687	4mer	4	5.42522	0.465711	1.45872	0.000934738	0.000997851	0.00113607	0	0
Or-Er-Sf_synthetic	1.50305	1.43294	1.34991	0.132437	0.212294	0.102578	3mer	3	1.50305	0.148545	0.128905	7.17334e-05	0.00159231	0.000442969	0	0
Or-Er-Sr-Kf_synthetic	6.02546	7.92344	7.55645	0.283933	0.395619	0.375528	4mer	4	6.02546	0.529732	1.84283	3.86633e-06	4.1101e-06	3.02282e-06	1	1
Or-Er-Sr-Kr_synthetic	6.5067	8.13507	6.94928	0.82375	1.42846	0.909291	4mer	4	6.5067	0.487783	1.83243	3.41972e-06	4.64254e-06	3.86633e-06	1	1
Or-Er-Sr_synthetic	1.45389	1.64137	1.64264	0.172125	0.152403	0.179717	3mer	3	1.45389	0.208353	0.174892	0.00020212	3.95278e-05	4.659e-05	1	0
Or-Er_synthetic	1.66701	1.84104	1.82021	0.432932	0.500246	0.520421	2mer	2	1.66701	0.237387	0.228472	0.00173157	0.000396658	0.000539384	0	0
Or-Kf-Ef-Sf_synthetic	5.53728	7.15941	7.10532	0.202988	0.319253	0.38342	4mer	4	5.53728	0.523654	1.67409	4.1101e-06	4.36855e-06	3.2154e-06	1	1
Or-Kf-Ef-Sr_synthetic	5.96134	7.60019	7.67369	0.285171	0.523236	0.286182	4mer	4	5.96134	0.52678	1.81306	3.86633e-06	4.1101e-06	3.02282e-06	1	1
Or-Kf-Ef_synthetic	4.12842	4.97642	4.86374	0.484526	0.618259	0.630705	3mer	3	4.12842	0.452078	1.07755	6.66573e-06	6.66573e-06	6.27818e-06	1	1
Or-Kf-Er-Sf_synthetic	4.79147	5.88546	5.91459	0.30812	0.537741	0.465242	4mer	4	4.79147	0.485192	1.34221	5.2407e-06	5.2407e-06	4.1101e-06	1	1
Or-Kf-Er-Sr_synthetic	5.2842	6.54705	6.93361	0.405683	0.424599	0.373476	4mer	4	5.2842	0.514788	1.57053	4.36855e-06	4.64254e-06	3.2154e-06	1	1
Or-Kf-Er_synthetic	4.2684	5.12631	5.15842	0.232944	0.43652	0.413808	3mer	3	4.2684	0.461332	1.13689	5.56679e-06	6.27818e-06	4.64254e-06	1	1
Or-Kf-Sf-Ef_synthetic	7.73423	9.6753	9.55175	0.966035	0.906347	0.986105	4mer	4	7.73423	0.52894	2.36191	4.36855e-06	3.41972e-06	3.41972e-06	1	1
Or-Kf-Sf-Er_synthetic	9.38819	11.4916	12.0596	0.373364	0.428748	0.519734	4mer	4	9.38819	0.545418	2.95631	3.02282e-06	3.02282e-06	3.02282e-06	1	1
Or-Kf-Sf_synthetic	2.00465	2.45511	2.23737	0.230758	0.254949	0.27904	3mer	3	2.00465	0.320781	0.371267	6.80028e-05	1.70179e-05	6.10853e-05	1	0
Or-Kf-Sr-Ef_synthetic	10.0058	12.6876	12.7097	0.749185	1.24736	0.729942	4mer	4	10.0058	0.554449	3.20298	3.02282e-06	3.02282e-06	3.02282e-06	1	1
Or-Kf-Sr-Er_synthetic	8.93232	11.1797	11.3339	0.96399	1.0728	1.26009	4mer	4	8.93232	0.544805	2.8096	3.41972e-06	3.2154e-06	3.2154e-06	1	1
Or-Kf-Sr_synthetic	2.86542	3.14158	3.36361	0.137915	0.171815	0.165834	3mer	3	2.86542	0.377309	0.6242	7.97046e-06	7.97046e-06	7.97046e-06	1	1
Or-Kf_synthetic	1.60972	1.74019	1.7435	0.114416	0.135721	0.162397	2mer	2	1.60972	0.220175	0.204624	6.80028e-05	3.95278e-05	0.000259371	0	0
Or-Kr-Ef-Sf_synthetic	4.13212	6.21301	4.59367	0.889691	1.19643	1.06534	4mer	4	4.13212	0.527743	1.25903	0.0010106	0.000249458	0.000321224	0	0
Or-Kr-Ef-Sr_synthetic	5.25106	6.37592	7.0495	0.413674	0.511229	0.464723	4mer	4	5.25106	0.517235	1.5681	5.74089e-05	6.92755e-05	4.74853e-05	1	0
Or-Kr-Ef_synthetic	3.95272	4.75849	4.76232	0.383772	0.308752	0.674766	3mer	3	3.95272	0.452001	1.03151	2.11754e-05	1.99212e-05	2.11754e-05	1	0
Or-Kr-Er-Sf_synthetic	4.58932	5.74514	5.7906	0.369155	0.580738	0.483486	4mer	4	4.58932	0.491801	1.3031	5.56679e-06	5.2407e-06	4.1101e-06	1	1
Or-Kr-Er-Sr_synthetic	4.30583	5.75888	5.3864	0.805656	0.846643	0.806871	4mer	4	4.30583	0.502748	1.24982	3.42914e-05	2.11754e-05	1.76217e-05	1	0
Or-Kr-Er_synthetic	3.72249	4.38354	4.92376	0.227007	0.573059	0.646043	3mer	3	3.72249	0.468052	1.00593	2.11754e-05	2.25046e-05	1.87378e-05	1	0
Or-Kr-Sf-Ef_synthetic	7.67968	10.7779	10.0272	1.14022	1.51906	1.19844	4mer	4	7.67968	0.579159	2.56791	5.05969e-05	5.05969e-05	4.74853e-05	1	0
Or-Kr-Sf-Er_synthetic	8.63074	11.2207	11.1285	0.770715	0.82026	0.798402	4mer	4	8.63074	0.55791	2.78004	1.21446e-05	1.21446e-05	1.14069e-05	1	1
Or-Kr-Sf_synthetic	3.6701	3.57485	2.81696	0.982091	0.370656	0.399041	3mer	3	3.6701	0.337139	0.714375	8.97231e-06	8.45722e-06	1.35131e-05	1	1
Or-Kr-Sr-Ef_synthetic	7.45902	10.938	9.33586	0.93632	0.798529	1.17549	4mer	4	7.45902	0.584587	2.5175	5.05969e-05	4.45558e-05	5.05969e-05	1	0
Or-Kr-Sr-Er_synthetic	6.90724	10.2218	7.79913	1.41414	2.17556	1.50468	4mer	4	6.90724	0.566627	2.25965	0.000616779	5.91226e-06	6.66573e-06	1	1
Or-Kr-Sr_synthetic	2.69083	2.55463	2.85368	0.317055	0.382039	0.241187	3mer	3	2.69083	0.319085	0.495715	0.000106611	0.000153018	0.000120359	0	0
Or-Kr_synthetic	0.89378	0.850303	0.624648	NA	NA	NA	2mer	2	0.89378	0.176853	0.0912603	NA	NA	NA	0	0
Or-Sf-Ef-Kf_synthetic	4.90827	6.15653	6.11799	0.364942	0.538512	0.6226	4mer	4	4.90827	0.49586	1.40516	4.64254e-06	4.93294e-06	4.1101e-06	1	1
Or-Sf-Ef-Kr_synthetic	4.73292	5.52864	5.53867	0.390494	0.876477	0.813396	4mer	4	4.73292	0.457754	1.25084	5.2407e-06	7.07609e-06	2.26247e-05	1	0
Or-Sf-Ef_synthetic	1.81484	2.07465	1.94115	0.198177	0.216787	0.197184	3mer	3	1.81484	0.266443	0.279179	2.5327e-05	1.908e-05	2.67906e-05	1	0
Or-Sf-Er-Kf_synthetic	5.28081	6.39552	6.70116	0.281144	0.346505	0.420656	4mer	4	5.28081	0.498902	1.52109	4.36855e-06	4.93294e-06	3.41972e-06	1	1
Or-Sf-Er-Kr_synthetic	6.71543	8.07022	7.68008	0.893199	0.909338	0.729281	4mer	4	6.71543	0.490495	1.90172	0.000205822	0.000219501	0.000180831	0	0
Or-Sf-Er_synthetic	1.9717	2.14855	2.16964	0.19785	0.169447	0.145304	3mer	3	1.9717	0.281712	0.32069	1.908e-05	1.80209e-05	1.80209e-05	1	0
Or-Sf-Kf-Ef_synthetic	11.5018	14.0029	14.4305	0.582365	0.837825	0.76037	4mer	4	11.5018	0.546862	3.63149	3.02282e-06	3.02282e-06	3.02282e-06	1	1
Or-Sf-Kf-Er_synthetic	8.649	11.1108	11.5878	0.448304	0.938792	0.846622	4mer	4	8.649	0.566188	2.82726	3.02282e-06	3.2154e-06	3.02282e-06	1	1
Or-Sf-Kf_synthetic	2.26467	2.46168	2.53183	0.110865	0.162581	0.198691	3mer	3	2.26467	0.317331	0.414914	1.07036e-05	1.27512e-05	1.35131e-05	1	1
Or-Sf-Kr-Ef_synthetic	9.26041	11.1462	10.6101	1.42283	1.53824	1.1913	4mer	4	9.26041	0.511464	2.73454	3.41972e-06	3.63646e-06	3.02282e-06	1	1
Or-Sf-Kr-Er_synthetic	9.94383	11.344	13.9186	0.983429	1.10949	0.646504	4mer	4	9.94383	0.564619	3.24152	3.41972e-06	3.41972e-06	3.02282e-06	1	1
Or-Sf-Kr_synthetic	3.05044	3.13443	2.83346	0.397596	0.267144	0.449982	3mer	3	3.05044	0.33144	0.583723	0.000100306	0.000106611	0.000483471	0	0
Or-Sf_synthetic	0.900567	0.797618	0.853974	0.0461269	0.041602	0.0508004	2mer	2	0.900567	0.0951516	0.0494734	0.765261	0.442082	0.765261	0	0
Or-Sr-Ef-Kf_synthetic	5.56736	7.01527	6.88888	0.331072	0.466075	0.493177	4mer	4	5.56736	0.50693	1.62943	4.64254e-06	4.1101e-06	3.41972e-06	1	1
Or-Sr-Ef-Kr_synthetic	5.89604	8.26727	7.91091	0.546885	0.780936	0.860984	4mer	4	5.89604	0.567512	1.93186	3.86633e-06	3.63646e-06	3.2154e-06	1	1
Or-Sr-Ef_synthetic	1.76933	1.81413	1.58452	0.170267	0.305347	0.304848	3mer	3	1.76933	0.211801	0.216359	0.000365465	0.0130613	0.03601	0	0
Or-Sr-Er-Kf_synthetic	6.08943	8.00486	7.51375	0.371319	0.55335	0.447508	4mer	4	6.08943	0.526479	1.85096	3.86633e-06	3.63646e-06	3.2154e-06	1	1
Or-Sr-Er-Kr_synthetic	8.11487	10.5307	8.41838	1.59451	2.16377	1.29822	4mer	4	8.11487	0.511662	2.3972	1.37588e-05	1.37588e-05	1.37588e-05	1	1
Or-Sr-Er_synthetic	2.11977	2.32342	2.45985	0.14896	0.207308	0.116923	3mer	3	2.11977	0.313877	0.384138	1.35131e-05	2.26247e-05	1.35131e-05	1	1
Or-Sr-Kf-Ef_synthetic	10.2354	11.5489	13.026	1.00393	1.97604	1.76802	4mer	4	10.2354	0.529818	3.1309	3.2154e-06	4.36855e-06	3.02282e-06	1	1
Or-Sr-Kf-Er_synthetic	10.7121	13.1328	12.7506	0.435232	0.878298	0.599269	4mer	4	10.7121	0.532031	3.29042	3.02282e-06	3.02282e-06	3.02282e-06	1	1
Or-Sr-Kf_synthetic	2.71668	3.29597	3.15967	0.318563	0.393237	0.321787	3mer	3	2.71668	0.389455	0.610851	9.5173e-06	8.45722e-06	8.97231e-06	1	1
Or-Sr-Kr-Ef_synthetic	12.0435	14.3555	15.1139	0.816839	0.858719	1.05537	4mer	4	12.0435	0.543885	3.78182	3.02282e-06	3.02282e-06	3.02282e-06	1	1
Or-Sr-Kr-Er_synthetic	10.6129	13.8503	13.3388	0.765462	1.12383	1.12752	4mer	4	10.6129	0.5627	3.44786	3.02282e-06	3.02282e-06	3.02282e-06	1	1
Or-Sr-Kr_synthetic	2.76708	3.56633	3.75412	0.359624	0.214628	0.273276	3mer	3	2.76708	0.454048	0.725376	3.23063e-05	2.54051e-05	2.54051e-05	1	0
Or-Sr_synthetic	0.978475	0.990274	0.948889	0.100142	0.132223	0.0833886	2mer	2	0.978475	0.0226565	0.0127992	0.571806	0.480714	0.765261	0	0
Sf-Ef-Kf-Of_synthetic	4.53157	5.7644	5.04328	0.282218	0.512082	0.324949	4mer	4	4.53157	0.467345	1.22272	4.64254e-06	4.64254e-06	4.93294e-06	1	1
Sf-Ef-Kf-Or_synthetic	5.7874	7.49834	7.04108	0.305126	0.484704	0.378725	4mer	4	5.7874	0.514393	1.71877	1.55765e-05	1.55765e-05	1.21446e-05	1	1
Sf-Ef-Kf_synthetic	2.37206	2.67429	2.70396	0.128454	0.125646	0.138087	3mer	3	2.37206	0.339702	0.465225	1.00938e-05	1.07036e-05	1.20303e-05	1	1
Sf-Ef-Kr-Of_synthetic	3.4682	4.02632	4.18417	0.485052	0.717657	0.613006	4mer	4	3.4682	0.426359	0.853727	0.000742717	0.000677031	0.000677031	0	0
Sf-Ef-Kr-Or_synthetic	4.5906	5.54385	5.71008	0.725069	0.916228	1.08062	4mer	4	4.5906	0.478552	1.26835	2.11754e-05	3.86144e-05	6.53078e-05	1	0
Sf-Ef-Kr_synthetic	2.45159	2.50859	2.41059	0.241103	0.309797	0.237464	3mer	3	2.45159	0.29759	0.421217	1.27512e-05	1.70179e-05	1.43184e-05	1	1
Sf-Ef-Of-Kf_synthetic	6.2212	7.34459	7.31808	0.500205	0.705152	0.780711	4mer	4	6.2212	0.486443	1.74721	3.63646e-06	4.36855e-06	3.63646e-06	1	1
Sf-Ef-Of-Kr_synthetic	6.8034	7.84823	8.05051	0.961551	0.645445	0.443664	4mer	4	6.8034	0.489292	1.92191	1.46407e-05	1.46407e-05	1.14069e-05	1	1
Sf-Ef-Of_synthetic	1.62085	2.05273	1.55577	0.287344	0.299974	0.220909	3mer	3	1.62085	0.266577	0.249462	0.0431018	0.000259443	0.0021062	0	0
Sf-Ef-Or-Kf_synthetic	4.18681	5.00652	4.75544	0.296041	0.491015	0.529414	4mer	4	4.18681	0.443473	1.07199	5.56679e-06	5.91226e-06	5.91226e-06	1	1
Sf-Ef-Or-Kr_synthetic	3.89133	4.37404	5.22981	0.358669	0.368367	0.3996	4mer	4	3.89133	0.471476	1.05925	6.27818e-06	6.27818e-06	4.93294e-06	1	1
Sf-Ef-Or_synthetic	1.3331	1.50865	1.46728	0.0850609	0.169045	0.0599566	3mer	3	1.3331	0.173042	0.133184	0.000396658	0.000978666	0.000151861	0	0
Sf-Ef_synthetic	1.2472	1.38704	1.28117	0.153789	0.196974	0.189303	2mer	2	1.2472	0.131316	0.0945571	0.00869851	0.00244346	0.0225701	0	0
Sf-Er-Kf-Of_synthetic	4.0969	4.86833	4.49862	0.349676	0.375145	0.577513	4mer	4	4.0969	0.43257	1.02318	5.2407e-06	5.2407e-06	6.66573e-06	1	1
Sf-Er-Kf-Or_synthetic	5.59644	7.20012	6.78598	0.608457	0.869949	0.919183	4mer	4	5.59644	0.508558	1.64321	4.64254e-06	4.64254e-06	4.1101e-06	1	1
Sf-Er-Kf_synthetic	2.48785	2.99936	3.37114	0.290544	0.239512	0.39821	3mer	3	2.48785	0.418585	0.601238	1.20303e-05	1.00938e-05	9.5173e-06	1	1
Sf-Er-Kr-Of_synthetic	4.84837	5.87433	6.20165	0.361766	0.368327	0.259917	4mer	4	4.84837	0.493208	1.38059	4.93294e-06	4.93294e-06	3.86633e-06	1	1
Sf-Er-Kr-Or_synthetic	5.80411	7.12383	7.2739	0.299204	0.302219	0.312339	4mer	4	5.80411	0.506888	1.69859	1.37588e-05	1.6569e-05	1.14069e-05	1	1
Sf-Er-Kr_synthetic	2.74587	2.95059	3.33143	0.251143	0.258488	0.0799951	3mer	3	2.74587	0.376394	0.59671	0.000106611	0.000106611	9.43549e-05	0	0
Sf-Er-Of-Kf_synthetic	5.37365	7.07306	7.03019	0.336963	0.510942	0.598019	4mer	4	5.37365	0.531827	1.64998	4.1101e-06	4.36855e-06	3.41972e-06	1	1
Sf-Er-Of-Kr_synthetic	6.46769	7.95812	7.61104	0.699556	0.817822	0.416072	4mer	4	6.46769	0.500344	1.86835	5.3901e-05	5.3901e-05	4.45558e-05	1	0
Sf-Er-Of_synthetic	1.20784	1.32714	1.20446	0.069491	0.0935355	0.0829106	3mer	3	1.20784	0.112438	0.0784082	0.00116936	0.000234853	0.0031366	0	0
Sf-Er-Or-Kf_synthetic	3.78179	4.53442	4.51971	0.190629	0.429587	0.16126	4mer	4	3.78179	0.443323	0.96796	6.27818e-06	6.66573e-06	5.56679e-06	1	1
Sf-Er-Or-Kr_synthetic	5.97988	6.9325	7.17509	1.22832	1.85969	1.58008	4mer	4	5.97988	0.483998	1.671	0.00023403	0.00023403	0.000205822	0	0
Sf-Er-Or_synthetic	1.30226	1.28612	1.31065	0.0961437	0.120893	0.131023	3mer	3	1.30226	0.115326	0.0867087	0.000402444	0.00215228	0.00340478	0	0
Sf-Er_synthetic	1.02651	1.02238	1.10627	0.118519	0.0781215	0.0905351	2mer	2	1.02651	0.0452691	0.0268289	0.300437	0.102542	0.0218285	0	0
Sf-Kf-Ef-Of_synthetic	4.77517	6.14431	5.87191	0.315033	0.444712	0.440052	4mer	4	4.77517	0.497054	1.37035	4.93294e-06	5.2407e-06	4.1101e-06	1	1
Sf-Kf-Ef-Or_synthetic	5.43306	6.78467	6.5332	0.472054	0.570928	0.871623	4mer	4	5.43306	0.495111	1.55305	4.1101e-06	4.93294e-06	4.64254e-06	1	1
Sf-Kf-Ef_synthetic	4.29706	5.68715	5.10606	0.566718	0.629708	0.548297	3mer	3	4.29706	0.487339	1.20904	5.91226e-06	5.2407e-06	5.2407e-06	1	1
Sf-Kf-Er-Of_synthetic	4.81827	6.43589	6.12838	0.346973	0.430501	0.346517	4mer	4	4.81827	0.518361	1.44199	4.64254e-06	4.64254e-06	3.63646e-06	1	1
Sf-Kf-Er-Or_synthetic	5.02948	6.135	6.49127	0.59559	0.707168	0.903331	4mer	4	5.02948	0.501177	1.45531	4.93294e-06	4.93294e-06	4.36855e-06	1	1
Sf-Kf-Er_synthetic	3.15921	4.3685	4.13308	0.266817	0.199523	0.250535	3mer	3	3.15921	0.486026	0.886496	8.45722e-06	6.66573e-06	7.07609e-06	1	1
Sf-Kf-Of-Ef_synthetic	9.33761	12.3962	11.5215	0.334088	0.444692	0.53856	4mer	4	9.33761	0.557317	3.00454	3.02282e-06	3.02282e-06	3.02282e-06	1	1
Sf-Kf-Of-Er_synthetic	8.22435	10.4966	10.3713	0.609273	0.788012	0.717447	4mer	4	8.22435	0.543754	2.58192	3.2154e-06	3.2154e-06	3.02282e-06	1	1
Sf-Kf-Of_synthetic	2.55544	3.0114	2.95223	0.0961213	0.184512	0.106471	3mer	3	2.55544	0.36857	0.543782	7.97046e-06	8.97231e-06	8.97231e-06	1	1
Sf-Kf-Or-Ef_synthetic	7.96305	10.9734	10.1114	0.225527	0.423444	0.513482	4mer	4	7.96305	0.567884	2.61083	3.02282e-06	3.02282e-06	3.02282e-06	1	1
Sf-Kf-Or-Er_synthetic	7.40329	9.38994	9.38203	0.572634	0.830954	0.912984	4mer	4	7.40329	0.536791	2.2944	3.2154e-06	3.41972e-06	3.02282e-06	1	1
Sf-Kf-Or_synthetic	3.3403	3.80552	3.96111	0.699994	0.919274	0.763064	3mer	3	3.3403	0.412135	0.794812	7.97046e-06	7.51056e-06	7.51056e-06	1	1
Sf-Kf_synthetic	1.13151	1.30662	1.06016	0.0961053	0.0545006	0.123214	2mer	2	1.13151	0.117308	0.0766346	0.0241194	0.000156904	0.188504	0	0
Sf-Kr-Ef-Of_synthetic	5.52744	6.76381	6.79003	0.192561	0.475325	0.431419	4mer	4	5.52744	0.496467	1.58436	1.6569e-05	1.55765e-05	1.29277e-05	1	1
Sf-Kr-Ef-Or_synthetic	6.7488	9.13012	8.79739	0.617908	0.604708	0.698912	4mer	4	6.7488	0.557585	2.17259	1.37588e-05	1.29277e-05	1.14069e-05	1	1
Sf-Kr-Ef_synthetic	3.7716	4.9841	4.68071	0.53352	0.206967	0.638319	3mer	3	3.7716	0.480988	1.04737	4.60804e-05	1.87378e-05	2.86588e-05	1	0
Sf-Kr-Er-Of_synthetic	3.88609	4.38487	4.76661	0.21093	0.67997	0.575059	4mer	4	3.88609	0.440375	0.988041	5.91226e-06	0.000616779	5.91226e-06	1	1
Sf-Kr-Er-Or_synthetic	4.79991	6.19979	6.17458	0.457217	0.69804	0.610168	4mer	4	4.79991	0.510686	1.41523	1.6569e-05	1.87378e-05	1.6569e-05	1	0
Sf-Kr-Er_synthetic	2.87347	2.98387	3.21801	0.254529	0.368369	0.297829	3mer	3	2.87347	0.35591	0.590454	1.00938e-05	0.000103804	1.07036e-05	1	1
Sf-Kr-Of-Ef_synthetic	9.83513	12.2734	11.7183	0.697694	0.806744	0.7263	4mer	4	9.83513	0.533058	3.02687	3.02282e-06	3.02282e-06	3.02282e-06	1	1
Sf-Kr-Of-Er_synthetic	9.71056	12.1231	12.0682	0.682095	0.920564	0.972061	4mer	4	9.71056	0.542879	3.04359	3.02282e-06	3.02282e-06	3.02282e-06	1	1
Sf-Kr-Of_synthetic	3.13522	3.55252	3.7868	0.237556	0.307795	0.221815	3mer	3	3.13522	0.406534	0.735874	2.69853e-05	2.86588e-05	2.54051e-05	1	0
Sf-Kr-Or-Ef_synthetic	7.26527	9.04752	9.76247	1.02407	1.43401	1.19759	4mer	4	7.26527	0.548727	2.30169	4.1101e-06	3.86633e-06	3.41972e-06	1	1
Sf-Kr-Or-Er_synthetic	5.56133	7.64328	7.26713	0.768798	0.743801	0.92387	4mer	4	5.56133	0.54836	1.76069	4.36855e-06	4.1101e-06	3.86633e-06	1	1
Sf-Kr-Or_synthetic	3.32669	4.13392	3.92222	0.155949	0.242696	0.223766	3mer	3	3.32669	0.432359	0.830418	7.51056e-06	6.27818e-06	7.07609e-06	1	1
Sf-Kr_synthetic	1.44952	1.35678	0.951974	0.170783	0.205636	0.227603	2mer	2	1.44952	0.172664	0.144499	0.000833072	0.0288357	0.500158	0	0
Sf-Of-Ef-Kf_synthetic	6.55476	8.44569	8.35258	0.290157	0.410751	0.388185	4mer	4	6.55476	0.534273	2.0219	3.2154e-06	3.41972e-06	3.02282e-06	1	1
Sf-Of-Ef-Kr_synthetic	6.64204	8.05322	8.297	0.403768	0.502684	0.408671	4mer	4	6.64204	0.513542	1.96932	1.21446e-05	1.29277e-05	1.14069e-05	1	1
Sf-Of-Ef_synthetic	2.02771	2.14042	2.32902	0.113265	0.128219	0.156758	3mer	3	2.02771	0.293911	0.344081	1.70179e-05	1.80209e-05	1.60683e-05	1	0
Sf-Of-Er-Kf_synthetic	5.17654	6.39123	6.91273	0.558979	0.543545	0.594153	4mer	4	5.17654	0.517847	1.54768	4.64254e-06	4.93294e-06	3.86633e-06	1	1
Sf-Of-Er-Kr_synthetic	6.24533	8.50405	9.34136	0.459054	1.04046	0.647177	4mer	4	6.24533	0.600521	2.16533	3.86633e-06	3.86633e-06	3.02282e-06	1	1
Sf-Of-Er_synthetic	1.99466	2.1311	2.12796	0.135816	0.194862	0.195417	3mer	3	1.99466	0.273732	0.315235	1.70179e-05	1.80209e-05	1.908e-05	1	0
Sf-Of-Kf-Ef_synthetic	10.8959	13.6011	13.5877	0.873215	1.01364	1.08827	4mer	4	10.8959	0.549217	3.45499	3.2154e-06	3.2154e-06	3.02282e-06	1	1
Sf-Of-Kf-Er_synthetic	9.48238	11.9439	12.0496	0.739	0.962405	1.02466	4mer	4	9.48238	0.55007	3.01144	3.02282e-06	3.02282e-06	3.02282e-06	1	1
Sf-Of-Kf_synthetic	3.66905	4.28219	4.43717	0.391035	0.470886	0.5717	3mer	3	3.66905	0.435944	0.92347	7.07609e-06	6.66573e-06	6.27818e-06	1	1
Sf-Of-Kr-Ef_synthetic	12.1713	16.1076	15.8556	0.38403	0.751419	0.573769	4mer	4	12.1713	0.582348	4.09221	3.02282e-06	3.02282e-06	3.02282e-06	1	1
Sf-Of-Kr-Er_synthetic	10.3708	13.6923	13.7008	0.226625	0.45344	0.481389	4mer	4	10.3708	0.57877	3.46545	3.02282e-06	3.02282e-06	3.02282e-06	1	1
Sf-Of-Kr_synthetic	5.80901	7.15624	7.09857	0.656643	0.650273	0.960916	3mer	3	5.80901	0.501149	1.68077	4.64254e-06	4.36855e-06	3.86633e-06	1	1
Sf-Of_synthetic	0.994324	0.934592	0.88598	0.0757922	0.109373	0.0708793	2mer	2	0.994324	0.0542992	0.0311717	0.201637	0.745946	0.954406	0	0
Sf-Or-Ef-Kf_synthetic	4.4143	5.43908	5.31874	0.44437	0.3393	0.482404	4mer	4	4.4143	0.471107	1.20066	1.76217e-05	1.87378e-05	1.6569e-05	1	0
Sf-Or-Ef-Kr_synthetic	3.18419	7.11397	6.01993	0.271455	1.57496	1.53636	4mer	4	3.18419	0.869723	1.59889	0.00121163	0.000997851	0.000997851	0	0
Sf-Or-Ef_synthetic	1.61228	1.52846	1.82231	0.119282	0.106074	0.137637	3mer	3	1.61228	0.216924	0.201924	0.000151861	0.000160422	8.21084e-05	0	0
Sf-Or-Er-Kf_synthetic	3.65196	4.83873	4.69025	0.444211	0.520923	0.529614	4mer	4	3.65196	0.486603	1.02598	6.27818e-06	5.91226e-06	5.56679e-06	1	1
Sf-Or-Er-Kr_synthetic	4.94688	6.34379	6.73861	0.36329	0.828751	0.771676	4mer	4	4.94688	0.52966	1.51275	0.000249458	0.00023403	0.000205822	0	0
Sf-Or-Er_synthetic	1.53054	1.65043	1.52935	0.0771335	0.0852402	0.0835321	3mer	3	1.53054	0.189905	0.167811	4.41126e-05	3.16796e-05	5.48378e-05	1	0
Sf-Or-Kf-Ef_synthetic	8.08628	9.70828	9.45633	0.563855	0.696865	0.840547	4mer	4	8.08628	0.507547	2.36954	3.02282e-06	3.41972e-06	3.2154e-06	1	1
Sf-Or-Kf-Er_synthetic	7.23349	9.14215	8.98525	0.248571	0.367104	0.43201	4mer	4	7.23349	0.528917	2.20889	3.02282e-06	3.2154e-06	3.02282e-06	1	1
Sf-Or-Kf_synthetic	1.84232	2.09066	2.18246	0.117749	0.330879	0.198643	3mer	3	1.84232	0.292431	0.311049	6.53078e-05	0.00406048	6.16476e-05	1	0
Sf-Or-Kr-Ef_synthetic	7.22993	9.47761	8.60698	0.490736	0.536827	0.60906	4mer	4	7.22993	0.530084	2.21268	3.2154e-06	3.2154e-06	3.2154e-06	1	1
Sf-Or-Kr-Er_synthetic	6.91327	9.15711	9.16263	0.566228	0.81608	0.728604	4mer	4	6.91327	0.557461	2.22504	3.63646e-06	3.63646e-06	3.02282e-06	1	1
Sf-Or-Kr_synthetic	2.14167	2.5071	3.16069	0.375021	0.384544	0.744926	3mer	3	2.14167	0.422871	0.522878	0.0032644	5.81823e-05	0.00298792	0	0
Sf-Or_synthetic	0.861934	0.728925	0.88344	0.0793538	0.0879301	0.0808034	2mer	2	0.861934	0.128914	0.0641525	0.96453	0.266255	0.924084	0	0
Sr-Ef-Kf-Of_synthetic	4.53715	5.50527	5.37306	0.331367	0.568157	0.423605	4mer	4	4.53715	0.465749	1.22004	4.64254e-06	4.93294e-06	4.64254e-06	1	1
Sr-Ef-Kf-Or_synthetic	4.99997	6.57313	7.00695	0.410222	0.891204	0.69785	4mer	4	4.99997	0.547221	1.57968	4.36855e-06	5.91226e-06	3.63646e-06	1	1
Sr-Ef-Kf_synthetic	3.10608	3.41491	3.55769	0.117193	0.127966	0.136224	3mer	3	3.10608	0.384645	0.689784	7.97046e-06	7.97046e-06	7.97046e-06	1	1
Sr-Ef-Kr-Of_synthetic	5.00628	5.96709	5.96858	0.270721	0.455349	0.386031	4mer	4	5.00628	0.472898	1.36685	4.93294e-06	4.64254e-06	4.1101e-06	1	1
Sr-Ef-Kr-Or_synthetic	6.32051	7.48025	7.44297	0.718573	0.841839	0.896722	4mer	4	6.32051	0.488548	1.78278	5.3901e-05	6.11322e-05	5.05969e-05	1	0
Sr-Ef-Kr_synthetic	2.6031	3.3954	3.19949	0.292443	0.430804	0.386046	3mer	3	2.6031	0.417412	0.627327	0.000272511	0.000742717	0.000315774	0	0
Sr-Ef-Of-Kf_synthetic	6.94855	9.71157	9.38541	0.59208	0.819611	1.13234	4mer	4	6.94855	0.580542	2.32899	3.63646e-06	3.41972e-06	3.2154e-06	1	1
Sr-Ef-Of-Kr_synthetic	9.81556	9.49002	10.9996	2.2778	1.46068	1.82902	4mer	4	9.81556	0.468325	2.654	1.29277e-05	1.37588e-05	1.29277e-05	1	1
Sr-Ef-Of_synthetic	1.33735	1.57646	1.54461	0.0744397	0.0764077	0.0656804	3mer	3	1.33735	0.198288	0.153102	0.000182733	3.16796e-05	4.91989e-05	1	0
Sr-Ef-Or-Kf_synthetic	4.62279	5.30276	4.99327	0.228562	0.276764	0.402805	4mer	4	4.62279	0.433899	1.15806	4.64254e-06	4.93294e-06	5.2407e-06	1	1
Sr-Ef-Or-Kr_synthetic	3.89984	4.53905	4.78203	0.498447	0.562031	0.572287	4mer	4	3.89984	0.447107	1.00669	7.84379e-05	7.84379e-05	6.92755e-05	1	0
Sr-Ef-Or_synthetic	1.39485	1.85732	2.61927	0.116108	0.175857	0.796723	3mer	3	1.39485	0.498702	0.401614	0.000402444	3.16796e-05	2.13787e-05	1	0
Sr-Ef_synthetic	1.57558	1.62919	1.53454	0.292531	0.406882	0.386189	2mer	2	1.57558	0.185624	0.168854	0.000103804	0.0022456	0.00173679	0	0
Sr-Er-Kf-Of_synthetic	4.64389	5.36768	6.12137	0.507665	0.804605	0.647618	4mer	4	4.64389	0.488906	1.31083	1.76217e-05	2.11754e-05	1.46407e-05	1	1
Sr-Er-Kf-Or_synthetic	6.37803	8.16103	8.39339	0.822607	0.974081	0.431174	4mer	4	6.37803	0.53965	1.98718	2.39396e-05	4.1101e-06	3.2154e-06	1	1
Sr-Er-Kf_synthetic	2.5148	2.97381	2.95574	0.16822	0.2292	0.205887	3mer	3	2.5148	0.370561	0.538024	1.00938e-05	1.00938e-05	9.5173e-06	1	1
Sr-Er-Kr-Of_synthetic	5.54651	6.73247	7.11995	0.321748	0.409232	0.341461	4mer	4	5.54651	0.507333	1.62462	4.36855e-06	4.64254e-06	3.41972e-06	1	1
Sr-Er-Kr-Or_synthetic	6.86724	8.27647	8.33063	0.41555	0.701613	0.425396	4mer	4	6.86724	0.506606	2.00859	3.2154e-06	3.63646e-06	3.2154e-06	1	1
Sr-Er-Kr_synthetic	3.2321	3.85161	4.10431	0.249025	0.34958	0.339977	3mer	3	3.2321	0.437179	0.8158	7.51056e-06	6.66573e-06	6.66573e-06	1	1
Sr-Er-Of-Kf_synthetic	6.13752	7.94761	7.92794	0.368832	0.534476	0.562245	4mer	4	6.13752	0.534503	1.89401	3.63646e-06	3.86633e-06	3.02282e-06	1	1
Sr-Er-Of-Kr_synthetic	7.18298	9.09138	8.70818	0.770971	1.41624	0.959839	4mer	4	7.18298	0.522811	2.16815	1.29277e-05	1.37588e-05	1.21446e-05	1	1
Sr-Er-Of_synthetic	1.45913	1.8227	1.65684	0.109021	0.184297	0.14917	3mer	3	1.45913	0.243741	0.205335	0.000182733	8.86813e-05	4.17606e-05	1	0
Sr-Er-Or-Kf_synthetic	4.66842	5.51029	5.27149	0.159621	0.213226	0.379347	4mer	4	4.66842	0.450914	1.21536	4.93294e-06	4.93294e-06	5.2407e-06	1	1
Sr-Er-Or-Kr_synthetic	5.87969	7.3836	7.33796	1.0284	1.25429	1.75694	4mer	4	5.87969	0.512874	1.74102	1.76217e-05	1.55765e-05	1.46407e-05	1	1
Sr-Er-Or_synthetic	1.44432	1.45411	1.55321	0.0636326	0.0953366	0.0822539	3mer	3	1.44432	0.170939	0.142542	5.78818e-05	0.000149087	9.85115e-05	0	0
Sr-Er_synthetic	1.1247	1.04299	1.22165	0.0563646	0.0848911	0.0645651	2mer	2	1.1247	0.0868597	0.0564019	0.00570589	0.0748493	0.00228171	0	0
Sr-Kf-Ef-Of_synthetic	6.24106	7.30333	7.46435	0.491987	0.537318	0.755446	4mer	4	6.24106	0.48872	1.76099	3.41972e-06	4.1101e-06	3.63646e-06	1	1
Sr-Kf-Ef-Or_synthetic	5.7932	6.13023	6.83081	0.671143	0.75534	0.911034	4mer	4	5.7932	0.459338	1.53635	4.93294e-06	5.91226e-06	4.36855e-06	1	1
Sr-Kf-Ef_synthetic	4.61073	5.64011	5.44708	0.464464	0.475797	0.592712	3mer	3	4.61073	0.469115	1.24879	6.92755e-05	6.92755e-05	6.50834e-05	1	0
Sr-Kf-Er-Of_synthetic	4.66612	6.16328	5.78877	0.452494	0.374243	0.382351	4mer	4	4.66612	0.505164	1.36091	4.93294e-06	4.64254e-06	4.1101e-06	1	1
Sr-Kf-Er-Or_synthetic	4.97395	5.43189	5.85728	0.276631	0.716264	0.588369	4mer	4	4.97395	0.450297	1.29312	4.64254e-06	6.66573e-06	4.1101e-06	1	1
Sr-Kf-Er_synthetic	3.45275	4.28059	3.93857	0.31072	0.445514	0.443507	3mer	3	3.45275	0.430003	0.857189	2.54051e-05	2.3913e-05	2.3913e-05	1	0
Sr-Kf-Of-Ef_synthetic	9.41457	12.4281	12.6606	0.403508	0.795082	0.848116	4mer	4	9.41457	0.579391	3.14928	3.02282e-06	3.02282e-06	3.02282e-06	1	1
Sr-Kf-Of-Er_synthetic	8.76066	11.6605	11.6278	1.03809	0.978281	1.17579	4mer	4	8.76066	0.574011	2.90333	3.2154e-06	3.02282e-06	3.02282e-06	1	1
Sr-Kf-Of_synthetic	3.36213	3.99991	3.91404	0.309679	0.413188	0.490644	3mer	3	3.36213	0.418782	0.812907	7.51056e-06	7.51056e-06	8.97231e-06	1	1
Sr-Kf-Or-Ef_synthetic	7.51963	9.41074	9.23831	0.401767	0.502659	0.509109	4mer	4	7.51963	0.525917	2.28325	3.02282e-06	3.2154e-06	3.02282e-06	1	1
Sr-Kf-Or-Er_synthetic	7.31829	9.16372	9.34796	0.342631	0.461711	0.372203	4mer	4	7.31829	0.534798	2.25964	3.02282e-06	3.41972e-06	3.02282e-06	1	1
Sr-Kf-Or_synthetic	3.00975	3.64282	3.80573	0.152948	0.199188	0.210888	3mer	3	3.00975	0.428472	0.744548	2.69853e-05	2.54051e-05	2.54051e-05	1	0
Sr-Kf_synthetic	1.36811	1.46978	1.35098	0.284283	0.334249	0.354441	2mer	2	1.36811	0.149817	0.118337	0.00642382	0.00902843	0.102542	0	0
Sr-Kr-Ef-Of_synthetic	4.80946	6.28106	6.65987	0.496265	0.527007	0.497572	4mer	4	4.80946	0.537423	1.49228	5.56679e-06	5.2407e-06	3.63646e-06	1	1
Sr-Kr-Ef-Or_synthetic	5.73962	6.16705	7.22199	0.929974	0.616107	0.999221	4mer	4	5.73962	0.480756	1.59312	1.6569e-05	1.87378e-05	1.37588e-05	1	1
Sr-Kr-Ef_synthetic	3.98699	5.8567	5.14991	0.469132	0.602846	0.555327	3mer	3	3.98699	0.53735	1.23692	6.66573e-06	4.93294e-06	5.2407e-06	1	1
Sr-Kr-Er-Of_synthetic	4.61438	5.53735	4.88474	0.312722	0.315015	0.362448	4mer	4	4.61438	0.442778	1.17961	4.64254e-06	4.93294e-06	5.2407e-06	1	1
Sr-Kr-Er-Or_synthetic	5.77098	7.33382	7.17961	0.950795	1.30403	1.26653	4mer	4	5.77098	0.513834	1.71203	6.11322e-05	5.74089e-05	5.05969e-05	1	0
Sr-Kr-Er_synthetic	3.16157	3.58207	4.18987	0.482464	0.549789	0.370046	3mer	3	3.16157	0.439022	0.80136	0.00249803	0.000487202	2.25046e-05	1	0
Sr-Kr-Of-Ef_synthetic	10.6081	13.3812	14.1325	0.884616	0.83592	1.26466	4mer	4	10.6081	0.570008	3.49106	3.02282e-06	3.02282e-06	3.02282e-06	1	1
Sr-Kr-Of-Er_synthetic	8.73357	10.1871	10.7933	1.15908	1.6327	1.55627	4mer	4	8.73357	0.519313	2.61855	3.63646e-06	4.36855e-06	3.63646e-06	1	1
Sr-Kr-Of_synthetic	3.3367	4.06316	4.25552	0.37853	0.571796	0.515573	3mer	3	3.3367	0.448301	0.863625	7.97046e-06	1.27512e-05	7.07609e-06	1	1
Sr-Kr-Or-Ef_synthetic	7.02785	12.4453	10.4125	0.979037	2.70767	1.59723	4mer	4	7.02785	0.712475	2.89089	8.45722e-06	3.2154e-06	3.41972e-06	1	1
Sr-Kr-Or-Er_synthetic	7.50843	10.2385	9.12389	0.6269	0.94453	0.467943	4mer	4	7.50843	0.550493	2.38638	1.29277e-05	1.29277e-05	1.14069e-05	1	1
Sr-Kr-Or_synthetic	2.21543	2.96404	2.58462	0.275474	0.481916	0.333223	3mer	3	2.21543	0.384036	0.491213	0.000182733	0.000535693	0.000777736	0	0
Sr-Kr_synthetic	2.10975	2.364	2.44286	0.697608	1.05115	0.890381	2mer	2	2.10975	0.316655	0.385706	0.000386661	0.000483471	0.000291074	0	0
Sr-Of-Ef-Kf_synthetic	6.07719	7.35514	7.47889	0.335666	0.515254	0.489887	4mer	4	6.07719	0.502157	1.7619	3.63646e-06	4.1101e-06	3.2154e-06	1	1
Sr-Of-Ef-Kr_synthetic	6.95596	9.99896	8.5845	0.500769	0.831138	0.897309	4mer	4	6.95596	0.568861	2.28456	3.41972e-06	3.2154e-06	3.41972e-06	1	1
Sr-Of-Ef_synthetic	2.43691	2.6261	2.77161	0.269107	0.294146	0.280624	3mer	3	2.43691	0.3354	0.471891	1.20303e-05	1.20303e-05	1.13485e-05	1	1
Sr-Of-Er-Kf_synthetic	6.13766	7.78563	7.69126	0.596027	0.80737	0.854855	4mer	4	6.13766	0.52025	1.84355	3.86633e-06	4.1101e-06	3.41972e-06	1	1
Sr-Of-Er-Kr_synthetic	8.25274	10.1303	9.89866	0.439057	0.711019	0.431543	4mer	4	8.25274	0.520521	2.48014	3.2154e-06	3.2154e-06	3.02282e-06	1	1
Sr-Of-Er_synthetic	2.00813	2.16239	2.1483	0.118797	0.127865	0.158289	3mer	3	2.00813	0.277623	0.321875	1.70179e-05	1.70179e-05	2.13787e-05	1	0
Sr-Of-Kf-Ef_synthetic	12.465	15.8083	16.4629	0.889034	1.65775	1.56797	4mer	4	12.465	0.57545	4.14134	3.02282e-06	3.2154e-06	3.02282e-06	1	1
Sf-Of-Kr-Ef_synthetic	10.6091	13.7454	13.1635	0.459591	0.675424	0.519092	4mer	4	10.6091	0.557263	3.41333	3.02282e-06	3.02282e-06	3.02282e-06	1	1
Sr-Of-Kf_synthetic	4.56753	5.50812	5.89405	0.590022	0.799848	0.61606	3mer	3	4.56753	0.488722	1.28879	8.45722e-06	9.5173e-06	4.36855e-06	1	1
Sr-Of-Kr-Ef_synthetic	10.888	13.602	14.4465	1.73341	2.46622	1.6992	4mer	4	10.888	0.567487	3.56734	1.46407e-05	4.34515e-05	1.14069e-05	1	1
Sr-Of-Kr-Er_synthetic	11.9183	15.6076	15.4152	1.14971	1.563	1.485	4mer	4	11.9183	0.576376	3.96606	3.2154e-06	3.2154e-06	3.02282e-06	1	1
Sr-Of-Kr_synthetic	5.07593	6.63234	6.502	0.252748	0.302231	0.385547	3mer	3	5.07593	0.518377	1.51915	4.93294e-06	4.64254e-06	3.41972e-06	1	1
Sr-Of_synthetic	0.983792	0.910815	0.86646	0.0584224	0.0564909	0.0966917	2mer	2	0.983792	0.0636884	0.0361746	0.153731	0.44869	0.748372	0	0
Sr-Or-Ef-Kf_synthetic	4.69815	5.27966	5.77977	0.406659	0.579399	0.571114	4mer	4	4.69815	0.46225	1.25384	5.56679e-06	5.91226e-06	4.36855e-06	1	1
Sr-Or-Ef-Kr_synthetic	5.70113	6.64866	8.17867	0.770378	0.646839	1.85398	4mer	4	5.70113	0.542804	1.78667	0.000219501	0.00023403	0.000205822	0	0
Sr-Or-Ef_synthetic	1.50706	1.95281	1.83903	0.132022	0.199767	0.15949	3mer	3	1.50706	0.283516	0.246689	0.000188909	6.16476e-05	0.000136014	0	0
Sr-Or-Er-Kf_synthetic	3.91186	5.27125	4.95451	0.279829	0.559191	0.519316	4mer	4	3.91186	0.497205	1.12294	6.27818e-06	5.2407e-06	5.2407e-06	1	1
Sr-Or-Er-Kr_synthetic	4.26362	4.40177	4.81257	0.710024	0.5214	0.563989	4mer	4	4.26362	0.413222	1.01719	6.92755e-05	7.84379e-05	6.50834e-05	1	0
Sr-Or-Er_synthetic	1.43812	1.32024	1.49176	0.112675	0.0961811	0.128131	3mer	3	1.43812	0.153204	0.127205	9.85115e-05	0.000402444	0.000156904	0	0
Sr-Or-Kf-Ef_synthetic	8.80499	10.8649	10.9346	0.655277	1.08166	0.78105	4mer	4	8.80499	0.534426	2.71679	3.02282e-06	3.02282e-06	3.02282e-06	1	1
Sr-Or-Kf-Er_synthetic	5.921	7.41093	6.91307	0.712641	1.04535	0.798011	4mer	4	5.921	0.49656	1.69749	1.37588e-05	1.55765e-05	1.37588e-05	1	1
Sr-Or-Kf_synthetic	2.63264	3.21429	2.61724	0.504815	0.80527	0.203186	3mer	3	2.63264	0.361672	0.549724	1.00938e-05	1.00938e-05	1.35131e-05	1	1
Sr-Or-Kr-Ef_synthetic	7.24785	9.66426	9.08065	0.543678	1.12873	0.8321	4mer	4	7.24785	0.547473	2.29093	3.41972e-06	3.63646e-06	3.2154e-06	1	1
Sr-Or-Kr-Er_synthetic	6.66257	8.6714	8.55633	0.438285	0.493137	0.511242	4mer	4	6.66257	0.540554	2.07932	3.41972e-06	3.63646e-06	3.02282e-06	1	1
Sr-Or-Kr_synthetic	2.41261	2.78223	2.73164	0.192461	0.242868	0.0809518	3mer	3	2.41261	0.347021	0.483373	1.07036e-05	1.13485e-05	1.07036e-05	1	1
Sr-Or_synthetic	0.912319	0.78489	0.750517	0.102887	0.0465894	0.108614	2mer	2	0.912319	0.126489	0.0666254	0.88603	0.408887	0.283917	0	0

## Sheet: 1D - SYN_all_RPM
Element_id	Barcode	RNA_counts_rep1	RNA_counts_rep2	RNA_counts_rep3	DNA_counts
Basal	AACCTGAAA	36.5613	42.5753	37.1954	184.904
Basal	AATCCAGGG	43.1518	60.5907	25.8516	197.241
Basal	AATGACCGA	27.2248	21.1038	18.6749	153.274
Basal	ACACAACGT	NA	NA	NA	NA
Basal	ACACATGCG	89.7557	82.1357	92.8342	375.595
Basal	ACACCGTGC	58.8433	47.5019	59.9602	237.806
Basal	ACACGGATT	NA	NA	NA	NA
Basal	ACCATTGTT	222.192	243.686	183.585	142.257
Basal	ACGTGGTAG	NA	NA	NA	NA
Basal	ACTACAGTG	112.352	118.975	118.917	565.83
Basal	ACTTGCCAG	78.8501	72.1353	70.0694	324.064
Basal	AGAGGCTTG	48.8792	45.296	53.5552	232.018
Basal	AGATAGGCA	70.612	69.7087	68.8347	348.789
Basal	AGCGTTGCT	58.5295	54.2669	48.5392	219.732
Basal	AGGTCCGAT	54.9989	33.1631	42.057	239.228
Basal	ATAACGAAC	98.6999	63.0908	93.1429	478.049
Basal	ATACCGGAC	NA	NA	NA	NA
Basal	ATCACTTGT	60.0202	41.1046	45.5296	262.023
Basal	ATCTGAGCG	26.5972	21.3244	18.6749	140.785
Basal	ATGAGAGTT	43.3087	35.222	18.4434	198.561
Basal	ATGATCGCC	69.2782	61.179	75.6255	321.982
Basal	ATGTCAGTA	166.723	145.079	139.753	620.509
Basal	ATGTTGGAA	NA	NA	NA	NA
Basal	ATTCCAGTT	NA	NA	NA	NA
Basal	ATTGCGGAA	40.4842	41.6193	28.784	231.003
Basal	CAAATCCCT	NA	NA	NA	NA
Basal	CAAGAGTCT	19.3791	11.9858	18.0575	75.3932
Basal	CAAGCCTAG	NA	NA	NA	NA
Basal	CAAGGGTTC	16.3192	20.2214	12.6557	92.8581
Basal	CAATTCCGT	86.1466	59.9289	63.51	328.532
Basal	CACGAAATT	98.9352	57.7965	72.3844	307.208
Basal	CAGTGTGGT	96.5031	67.7969	82.9566	405.6
Basal	CCAAGACAC	42.8379	42.4282	26.0831	166.068
Basal	CCAATGACG	82.8514	71.547	62.3525	328.227
Basal	CCGCGTAAG	31.6185	13.0888	22.4561	76.8656
Basal	CCGGGAGAT	9.96414	9.85334	7.71689	42.0882
Basal	CCTACGATC	59.2356	48.6785	46.2242	251.92
Basal	CCTCTACCT	49.5853	46.4725	50.8543	200.49
Basal	CGATCGGGT	26.3618	27.2805	23.5365	99.052
Basal	CGCACAATG	6.19816	7.64737	3.31826	29.3957
Basal	CGGATCTGT	6.51199	6.91205	3.4726	26.7049
Basal	CGGGCTAAA	47.31	43.1635	48.9251	81.5364
Basal	CGTGTTCTC	42.2103	26.5452	31.7164	165.002
Basal	CGTTACCGT	3.45214	3.16189	4.32146	20.7141
Basal	CTAAATGCG	35.6198	21.9127	25.0027	128.905
Basal	CTACATAAC	11.2195	4.26488	13.1959	56.8115
Basal	CTCCCGATA	NA	NA	NA	NA
Basal	CTCGTGCAT	47.3885	52.1345	40.1278	244.254
Basal	CTGCCTACC	NA	NA	NA	NA
Basal	CTTATCGCT	40.4842	25.3687	33.4913	190.793
Basal	CTTCAGCCG	47.1531	32.869	36.4237	180.182
Basal	CTTCTAGTC	153.071	121.108	133.039	345.793
Basal	GAAGATTGG	NA	NA	NA	NA
Basal	GAAGCCACC	NA	NA	NA	NA
Basal	GACTCTCGA	112.038	95.3715	114.519	455.152
Basal	GAGTGCAAT	5.41359	3.23543	4.93881	31.985
Basal	GATCCCAGG	86.5389	74.6354	53.3237	448.856
Basal	GATTACGTG	63.3154	36.6927	52.8607	269.588
Basal	GCACTCCTT	4.62901	3.89722	5.09315	24.7249
Basal	GCAGAGGTG	117.765	78.7532	72.4616	659.5
Basal	GCCCGAGAT	59.6279	42.7223	53.7096	236.588
Basal	GCCTTTGGC	2.51065	3.45602	4.78447	14.4694
Basal	GCGAAGCCT	70.5335	47.0607	46.147	360.618
Basal	GCGTCCATA	80.9684	64.1938	73.3876	413.673
Basal	GCTAAGCGG	28.2448	31.0307	22.2246	152.868
Basal	GCTAGCTGT	NA	NA	NA	NA
Basal	GCTCCAATT	25.6557	16.6919	22.842	113.268
Basal	GCTCTGATC	31.3831	18.8243	26.8548	187.747
Basal	GGACACGAG	17.9668	22.9421	16.8228	96.8181
Basal	GGACTATAC	22.3605	26.4717	29.0927	140.937
Basal	GGCCATTGA	52.7236	25.8099	33.8771	175.664
Basal	GGGTGAACA	26.4403	22.795	13.8904	99.4581
Basal	GGGTGTAGG	NA	NA	NA	NA
Basal	GGGTTTCCC	108.664	92.945	94.4547	436.113
Basal	GGTAAATTG	60.334	36.1779	47.1502	199.678
Basal	GGTCTGCTA	94.0709	86.3271	71.2269	288.17
Basal	GGTGATGGC	25.8911	21.545	19.8324	185.31
Basal	GGTGATTAT	29.5786	18.3096	27.0091	150.431
Basal	GGTGCATGG	21.1051	11.6181	11.421	82.0949
Basal	GGTTAGGGA	118.55	83.9005	73.0789	546.03
Basal	GTAATGTCA	128.671	77.7238	77.4004	565.779
Basal	GTATTCGCG	109.213	86.8418	90.6735	568.013
Basal	GTCGACTAC	5.17821	4.63254	4.63013	39.6513
Basal	GTCTTATGG	103.094	72.9442	81.7219	439.413
Basal	GTGACCTCT	60.4909	47.9431	42.6744	310.458
Basal	GTGACGGTT	384.678	363.691	374.809	393.314
Basal	GTGATCTCG	40.0135	31.3983	29.4785	187.138
Basal	GTGCAGCAG	73.2011	40.8105	53.0922	300.304
Basal	GTGCCTGTA	NA	NA	NA	NA
Basal	GTGGAGTCA	41.9749	32.4278	27.395	167.997
Basal	GTGTCGGAA	32.1677	17.3537	18.752	148.451
Basal	GTTTCGGAC	130.24	74.9295	89.9018	615.585
Basal	TACTTTCCG	99.6414	81.9151	88.3584	380.926
Basal	TCAACGGGT	NA	NA	NA	NA
Basal	TCAACGTTA	NA	4.26488	4.08995	NA
Basal	TCGAATAGT	7.0612	1.25005	6.09634	25.3342
Basal	TCGCTTCCG	14.2009	14.0447	11.6525	49.3991
Basal	TCGGCATGG	328.032	317.366	299.955	611.523
Basal	TCGGGACGA	68.1798	54.4875	41.594	228.261
Basal	TCTACGACC	112.352	90.2243	93.6059	464.036
Basal	TGCTGTTAT	54.2143	57.7965	56.3333	297.511
Basal	TGGACTCGT	26.048	19.192	21.3758	115.806
Basal	TGGGATCGG	125.532	92.2097	87.2009	378.692
Basal	TGTCCCGAC	17.7315	14.1918	24.5397	83.2118
Basal	TGTCGGATT	79.6346	72.8706	55.8703	332.441
Basal	TGTGTTAGG	79.007	44.4136	45.0666	229.835
Basal	TGTTGGGAC	NA	NA	NA	NA
Basal	TTACGATAC	NA	NA	NA	NA
Basal	TTATACCAG	24.165	19.0449	18.752	110.018
Basal	TTCTCTCGA	28.1663	16.3977	17.5173	99.7628
Basal	TTGAGTTGT	52.096	30.0012	40.205	231.409
Basal	TTTCATCCC	NA	NA	NA	NA
Ef-Kf-Of-Sf_synthetic	AACCAAGTA	162.721	200.008	167.457	221.407
Ef-Kf-Of-Sf_synthetic	ACTGAACAC	131.652	128.902	127.252	162.007
Ef-Kf-Of-Sf_synthetic	CAGGCAGAC	10.278	8.30916	12.2699	15.5356
Ef-Kf-Of-Sf_synthetic	CTCACTGTT	190.809	169.86	181.964	213.03
Ef-Kf-Of-Sf_synthetic	GCATTAAAG	68.4152	71.2529	65.9794	85.6487
Ef-Kf-Of-Sf_synthetic	GGATATGTA	49.7422	57.0612	61.6579	114.283
Ef-Kf-Of-Sf_synthetic	TGTCTTCTC	106.075	89.489	109.348	118.7
Ef-Kf-Of-Sf_synthetic	TTTGGTACT	151.737	160.595	149.939	158.453
Ef-Kf-Of-Sr_synthetic	AGAACACTG	163.898	154.712	145.078	137.891
Ef-Kf-Of-Sr_synthetic	ATAGACGGG	140.832	160.301	135.431	111.846
Ef-Kf-Of-Sr_synthetic	GGAGACGCT	85.9113	80.6651	64.9762	76.6117
Ef-Kf-Of-Sr_synthetic	GGTGGGCAT	27.6171	29.1188	22.9963	76.5102
Ef-Kf-Of-Sr_synthetic	GTGCTTATA	63.0016	91.4008	84.4999	50.3637
Ef-Kf-Of-Sr_synthetic	TCATAACAC	178.962	175.89	165.682	176.374
Ef-Kf-Of-Sr_synthetic	TCTAGTTGG	247.77	320.454	302.811	299.948
Ef-Kf-Of-Sr_synthetic	TGCTAGACC	177.158	207.656	191.765	206.836
Ef-Kf-Of_synthetic	AACGACTAC	100.74	108.534	100.937	150.431
Ef-Kf-Of_synthetic	AGGTACGGA	8.94419	14.4124	3.08676	22.5926
Ef-Kf-Of_synthetic	GACGTGGTC	102.074	102.063	89.1301	179.37
Ef-Kf-Of_synthetic	GGCAGATGG	NA	NA	NA	NA
Ef-Kf-Of_synthetic	GTATACGCC	23.6942	28.8247	30.173	54.5268
Ef-Kf-Of_synthetic	GTCATGGAA	72.3381	59.0465	59.42	134.54
Ef-Kf-Of_synthetic	TATCTGGTA	115.019	129.711	115.522	178.659
Ef-Kf-Of_synthetic	TCTGGCAAG	NA	NA	NA	NA
Ef-Kf-Or-Sf_synthetic	CACATCACG	6.04125	1.32358	1.15753	3.96005
Ef-Kf-Or-Sf_synthetic	CCTTGCCTG	436.461	458.769	443.181	453.832
Ef-Kf-Or-Sf_synthetic	CTCCAACTC	279.31	293.836	272.715	327.466
Ef-Kf-Or-Sf_synthetic	TAACCAGGA	135.34	124.049	114.133	111.541
Ef-Kf-Or-Sf_synthetic	TAGCAATCT	174.176	167.507	160.974	170.891
Ef-Kf-Or-Sf_synthetic	TCTCGTCAA	143.185	198.17	170.312	131.24
Ef-Kf-Or-Sf_synthetic	TGATCTCGG	601.379	696.058	691.356	361.278
Ef-Kf-Or-Sf_synthetic	TGCATAGTA	488.87	464.651	481.997	398.493
Ef-Kf-Or-Sr_synthetic	ACAGTTGAA	284.409	334.058	301.962	217.447
Ef-Kf-Or-Sr_synthetic	AGTGGAAGC	420.377	429.576	367.787	330.359
Ef-Kf-Or-Sr_synthetic	CAAACCATA	NA	NA	5.01598	NA
Ef-Kf-Or-Sr_synthetic	CACGGTCTC	212.856	225.083	213.218	129.869
Ef-Kf-Or-Sr_synthetic	CCAATCGCC	296.1	349.132	339.466	136.825
Ef-Kf-Or-Sr_synthetic	GGCACACTC	734.051	705.47	694.983	651.225
Ef-Kf-Or-Sr_synthetic	TAGCTTAAC	277.27	277.291	252.342	165.154
Ef-Kf-Or-Sr_synthetic	TTGACCCGA	257.812	279.497	274.49	315.585
Ef-Kf-Or_synthetic	AAAGCCGGT	178.021	171.698	173.553	163.479
Ef-Kf-Or_synthetic	ATATGCACC	8.5519	8.23563	6.79086	10.6617
Ef-Kf-Or_synthetic	CCTATATTC	NA	NA	0.540182	NA
Ef-Kf-Or_synthetic	GATGGCTCT	114.156	122.137	102.866	142.409
Ef-Kf-Or_synthetic	GATGTTCTG	180.688	168.83	168.537	195.362
Ef-Kf-Or_synthetic	TCAGCGGCT	76.104	65.4439	79.5611	79.3533
Ef-Kf-Or_synthetic	TGCTTGGTT	140.518	144.271	156.421	127.686
Ef-Kf-Or_synthetic	TTCTACCCA	229.646	259.937	257.898	230.038
Ef-Kf-Sf-Of_synthetic	AGACATACC	86.382	73.0912	91.2908	93.0104
Ef-Kf-Sf-Of_synthetic	AGCATTAAC	241.022	248.613	239.301	250.854
Ef-Kf-Sf-Of_synthetic	AGTGTGTCA	65.6691	70.297	52.8607	72.0424
Ef-Kf-Sf-Of_synthetic	CGAACAGGC	287.626	236.554	264.303	235.623
Ef-Kf-Sf-Of_synthetic	GCCCGCATA	94.9339	84.6358	103.175	75.0886
Ef-Kf-Sf-Of_synthetic	GCTTCATCT	3.37368	7.50031	3.93561	7.56471
Ef-Kf-Sf-Of_synthetic	GGGTTACTG	129.612	131.329	142.994	144.593
Ef-Kf-Sf-Of_synthetic	GTCTTTGCC	230.666	224.715	215.456	233.034
Ef-Kf-Sf-Or_synthetic	AAACCCTCG	132.672	157.359	131.959	132.915
Ef-Kf-Sf-Or_synthetic	AACAGGGCC	419.121	429.062	404.597	277.305
Ef-Kf-Sf-Or_synthetic	ACAATAGTC	72.495	73.4589	78.6351	59.6546
Ef-Kf-Sf-Or_synthetic	ATCCAGGTT	119.883	125.005	117.837	63.4623
Ef-Kf-Sf-Or_synthetic	GTGCGTTAA	101.681	109.931	93.1429	181.807
Ef-Kf-Sf-Or_synthetic	GTTAATGGG	218.583	244.716	235.365	173.684
Ef-Kf-Sf-Or_synthetic	GTTTCTAGG	65.6691	69.7823	73.6963	57.3699
Ef-Kf-Sf-Or_synthetic	TCGATGTCT	24.7927	18.4566	17.6717	17.2618
Ef-Kf-Sf_synthetic	AAACGTCCG	283.468	293.983	283.982	480.131
Ef-Kf-Sf_synthetic	AAATTCGTC	171.979	194.346	185.128	295.836
Ef-Kf-Sf_synthetic	ACTCTAACA	51.076	39.781	44.758	89.4057
Ef-Kf-Sf_synthetic	ACTCTGGAG	10.8272	17.5742	15.5109	25.5372
Ef-Kf-Sf_synthetic	CGGTCCATA	39.8565	45.5166	43.9091	71.1286
Ef-Kf-Sf_synthetic	CTTAGTCAT	19.9283	20.0008	21.0671	37.3666
Ef-Kf-Sf_synthetic	GCAGAATTA	5.41359	5.14727	4.24429	12.0325
Ef-Kf-Sf_synthetic	GGCAATGAA	96.3461	50.8844	95.0721	186.224
Ef-Kf-Sr-Of_synthetic	ACTATGGCG	50.9191	51.4727	50.7771	49.9575
Ef-Kf-Sr-Of_synthetic	AGAAAGACA	193.948	189.64	188.369	149.517
Ef-Kf-Sr-Of_synthetic	CCACGTCTG	130.475	170.595	180.807	115.095
Ef-Kf-Sr-Of_synthetic	CGATATATG	146.402	114.711	113.207	118.954
Ef-Kf-Sr-Of_synthetic	CTAATCGGC	94.777	94.3421	100.242	63.97
Ef-Kf-Sr-Of_synthetic	GATGTAATC	271.307	272.07	252.882	228.363
Ef-Kf-Sr-Of_synthetic	GGAGTTGAC	191.045	153.242	172.858	147.131
Ef-Kf-Sr-Of_synthetic	GTTGAGACA	798.072	783.341	762.12	549.076
Ef-Kf-Sr-Or_synthetic	AAATAGCGC	175.667	164.786	168.228	113.521
Ef-Kf-Sr-Or_synthetic	AAGAGGCAG	45.9763	56.1788	58.957	62.2438
Ef-Kf-Sr-Or_synthetic	CATTGTGTC	81.4392	74.7089	86.1205	53.9176
Ef-Kf-Sr-Or_synthetic	CGATTTACC	66.846	55.8111	81.799	42.5451
Ef-Kf-Sr-Or_synthetic	CTGCCCACA	NA	NA	NA	NA
Ef-Kf-Sr-Or_synthetic	GGTAGCCGA	40.4057	36.1779	51.2401	40.6159
Ef-Kf-Sr-Or_synthetic	GTCCAATCC	6.11971	12.8682	10.6493	11.8294
Ef-Kf-Sr-Or_synthetic	TATAAGACG	58.7649	59.7083	53.6324	37.3666
Ef-Kf-Sr_synthetic	ACGGGTTAC	0.784578	1.69125	2.62374	1.82771
Ef-Kf-Sr_synthetic	ACTCCACAG	14.8285	8.08857	17.9804	30.8173
Ef-Kf-Sr_synthetic	ACTCGTAAA	105.683	125.152	129.258	182.315
Ef-Kf-Sr_synthetic	ATTAGTGCG	122.237	126.108	99.7022	172.313
Ef-Kf-Sr_synthetic	CGATACTGC	346.234	243.76	283.75	490.081
Ef-Kf-Sr_synthetic	CGCAGTGCT	103.564	79.1944	110.892	140.785
Ef-Kf-Sr_synthetic	CTGTACGGC	52.6452	37.7221	51.626	58.2838
Ef-Kf-Sr_synthetic	GCAAGAGAC	42.3672	38.7516	37.4269	57.7253
Ef-Kf_synthetic	AATTCGTAG	74.6133	76.3266	59.3429	219.63
Ef-Kf_synthetic	CCAGAATCT	49.0361	48.9726	41.6712	108.597
Ef-Kf_synthetic	CTACAAAGC	50.4483	56.2523	36.5781	111.998
Ef-Kf_synthetic	GACGCTGTC	9.25802	2.42657	6.25068	16.7033
Ef-Kf_synthetic	GCTCATAAG	70.6904	63.532	80.873	184.548
Ef-Kf_synthetic	GGACACTGC	228.077	217.362	216.304	232.577
Ef-Kf_synthetic	TCTATGCTG	NA	NA	NA	NA
Ef-Kf_synthetic	TTCCTGCTG	237.727	200.523	215.301	477.084
Ef-Kr-Of-Sf_synthetic	AATTGGTTG	158.249	192.876	162.981	198.053
Ef-Kr-Of-Sf_synthetic	CAGAAGGCA	NA	NA	NA	NA
Ef-Kr-Of-Sf_synthetic	GATGAAGGG	NA	NA	NA	NA
Ef-Kr-Of-Sf_synthetic	GGATGCCCA	NA	NA	NA	NA
Ef-Kr-Of-Sf_synthetic	TAGACGCAA	5.96279	2.2795	3.08676	6.80316
Ef-Kr-Of-Sf_synthetic	TATAGGTCC	9.41493	8.01503	8.95159	12.0832
Ef-Kr-Of-Sf_synthetic	TCTGATTTC	11.2979	8.89742	7.9484	15.9417
Ef-Kr-Of-Sf_synthetic	TGACATGAA	109.37	110.446	93.2972	103.367
Ef-Kr-Of-Sr_synthetic	ATAGGAGCT	NA	NA	NA	NA
Ef-Kr-Of-Sr_synthetic	CATCATGTT	NA	NA	NA	NA
Ef-Kr-Of-Sr_synthetic	CATTGCAGC	150.874	154.712	133.734	140.379
Ef-Kr-Of-Sr_synthetic	CTTCGCATT	NA	NA	NA	NA
Ef-Kr-Of-Sr_synthetic	GGAGGCCTA	NA	NA	NA	NA
Ef-Kr-Of-Sr_synthetic	GTGAACGAG	0.549204	1.91184	1.0032	2.6908
Ef-Kr-Of-Sr_synthetic	GTGACTTTC	70.0628	75.7384	83.3424	79.6071
Ef-Kr-Of-Sr_synthetic	TGCTGTCTC	65.1199	51.2521	58.5712	112.151
Ef-Kr-Of_synthetic	AGCTGTGCC	78.0655	78.6062	67.9086	134.946
Ef-Kr-Of_synthetic	ATAATCGCG	NA	NA	NA	NA
Ef-Kr-Of_synthetic	GAACTCAGG	NA	NA	NA	NA
Ef-Kr-Of_synthetic	GACGTGAGA	NA	1.69125	0.385844	NA
Ef-Kr-Of_synthetic	GCGCATAGG	NA	NA	NA	NA
Ef-Kr-Of_synthetic	GTCTGACTA	NA	NA	NA	NA
Ef-Kr-Of_synthetic	TATGGTCTT	NA	NA	NA	NA
Ef-Kr-Of_synthetic	TGGAACGTT	17.7315	20.5155	8.56575	49.7545
Ef-Kr-Or-Sf_synthetic	AATGGAACC	61.354	55.0022	70.378	53.613
Ef-Kr-Or-Sf_synthetic	ATAACAGAG	NA	NA	NA	NA
Ef-Kr-Or-Sf_synthetic	CTGATAGCT	NA	NA	NA	NA
Ef-Kr-Or-Sf_synthetic	GAAGAAGCC	2.43219	5.88259	4.4758	6.34623
Ef-Kr-Or-Sf_synthetic	GTTAGGCTG	9.02264	2.79423	2.4694	4.51852
Ef-Kr-Or-Sf_synthetic	GTTATCCCG	3.21677	3.89722	5.55616	8.27549
Ef-Kr-Or-Sf_synthetic	TAAGGGCCA	5.33513	5.51493	7.9484	8.52934
Ef-Kr-Or-Sf_synthetic	TTGCTATTG	NA	NA	NA	NA
Ef-Kr-Or-Sr_synthetic	ATACTTCCA	317.989	319.131	345.099	241.461
Ef-Kr-Or-Sr_synthetic	ATCTTGCTA	111.332	104.784	138.595	76.6117
Ef-Kr-Or-Sr_synthetic	ATGGGTTAT	2.11836	0.588259	3.00959	3.24927
Ef-Kr-Or-Sr_synthetic	CAAACGGGC	NA	NA	1.46621	NA
Ef-Kr-Or-Sr_synthetic	CCAGACACT	NA	NA	NA	NA
Ef-Kr-Or-Sr_synthetic	GCATAGGCT	NA	NA	NA	NA
Ef-Kr-Or-Sr_synthetic	TCACAGCCC	NA	NA	NA	NA
Ef-Kr-Or-Sr_synthetic	TTCAAGCTG	27.931	31.0307	37.4269	18.7341
Ef-Kr-Or_synthetic	ACTCAGAAT	NA	NA	NA	NA
Ef-Kr-Or_synthetic	CATTCGAGA	4.47209	11.4711	9.10593	10.5601
Ef-Kr-Or_synthetic	CCGTGGTAA	NA	NA	NA	NA
Ef-Kr-Or_synthetic	GATTGCGTA	NA	NA	NA	NA
Ef-Kr-Or_synthetic	GTAAGTGTA	NA	NA	NA	NA
Ef-Kr-Or_synthetic	TTCAGAGGC	128.592	142.359	166.993	133.525
Ef-Kr-Or_synthetic	TTCTCAGTA	102.074	79.7827	94.6091	78.8964
Ef-Kr-Or_synthetic	TTGTGAGTA	NA	NA	NA	NA
Ef-Kr-Sf-Of_synthetic	ATGTACGCT	22.2035	31.1777	29.6329	33.5081
Ef-Kr-Sf-Of_synthetic	CATTACAAG	137.929	141.109	133.811	99.0012
Ef-Kr-Sf-Of_synthetic	CTCAACGGA	NA	NA	NA	NA
Ef-Kr-Sf-Of_synthetic	GGAAACAAC	NA	NA	NA	NA
Ef-Kr-Sf-Of_synthetic	GGCATGGAC	97.9153	114.049	108.885	119.309
Ef-Kr-Sf-Of_synthetic	GGCTAACAA	13.9655	21.3244	17.0543	19.6987
Ef-Kr-Sf-Of_synthetic	GTAACACCG	58.9218	50.4432	44.6036	52.5976
Ef-Kr-Sf-Of_synthetic	TGGGTCGGT	154.17	169.713	163.752	140.48
Ef-Kr-Sf-Or_synthetic	AACCTAATG	99.7198	88.4595	69.7607	53.1053
Ef-Kr-Sf-Or_synthetic	ATGCTACAC	NA	NA	NA	NA
Ef-Kr-Sf-Or_synthetic	CCAGGACTC	16.8684	23.8245	25.3886	18.2771
Ef-Kr-Sf-Or_synthetic	CGCTAAGAC	NA	NA	NA	NA
Ef-Kr-Sf-Or_synthetic	GTTACACGT	NA	1.54418	0.463013	NA
Ef-Kr-Sf-Or_synthetic	TCCCAATTA	NA	NA	NA	NA
Ef-Kr-Sf-Or_synthetic	TCTGCGAAG	NA	NA	NA	NA
Ef-Kr-Sf-Or_synthetic	TGGTTACCA	1.64761	3.16189	0.771689	5.8893
Ef-Kr-Sf_synthetic	ACCATGGCA	NA	NA	NA	NA
Ef-Kr-Sf_synthetic	AGTCGTTCT	62.0601	70.5176	72.4616	132.002
Ef-Kr-Sf_synthetic	ATTGACCTT	NA	NA	NA	NA
Ef-Kr-Sf_synthetic	CTACATCCT	87.1666	81.8416	78.2493	148.959
Ef-Kr-Sf_synthetic	CTCGTGACT	10.7487	11.2505	15.1251	11.1694
Ef-Kr-Sf_synthetic	GAGACAGTC	NA	NA	NA	NA
Ef-Kr-Sf_synthetic	GATACGATC	NA	NA	NA	NA
Ef-Kr-Sf_synthetic	GGGTGAGAT	22.5958	16.3242	12.2699	60.5177
Ef-Kr-Sr-Of_synthetic	AGCGGTAGA	0.941493	0.588259	1.92922	1.87848
Ef-Kr-Sr-Of_synthetic	AGGGATGAC	89.128	96.6951	69.3748	80.9779
Ef-Kr-Sr-Of_synthetic	AGGGCTAAG	137.301	124.049	127.715	102.454
Ef-Kr-Sr-Of_synthetic	CCTTCTTCG	8.86573	6.61792	7.02237	6.14315
Ef-Kr-Sr-Of_synthetic	CGGGTTGAG	58.0587	58.8259	73.6191	49.9575
Ef-Kr-Sr-Of_synthetic	GGCACCTGA	NA	NA	NA	NA
Ef-Kr-Sr-Of_synthetic	TACCGCGGT	12.0825	16.1036	12.2699	8.4278
Ef-Kr-Sr-Of_synthetic	TGTTCGCCT	NA	NA	NA	NA
Ef-Kr-Sr-Or_synthetic	AGCCTCTAT	1.4907	1.47065	2.08356	0.863088
Ef-Kr-Sr-Or_synthetic	AGTACCGTT	NA	NA	NA	NA
Ef-Kr-Sr-Or_synthetic	AGTCAAGGG	NA	NA	NA	NA
Ef-Kr-Sr-Or_synthetic	GAAGACTGA	3.76597	5.07374	9.49177	6.09238
Ef-Kr-Sr-Or_synthetic	GACCACATT	NA	NA	NA	NA
Ef-Kr-Sr-Or_synthetic	GATTCGTCC	NA	NA	NA	NA
Ef-Kr-Sr-Or_synthetic	TAGCATGCG	NA	NA	0.69452	NA
Ef-Kr-Sr-Or_synthetic	TGACCTTGT	NA	NA	NA	NA
Ef-Kr-Sr_synthetic	ACCTTTACT	30.8339	35.075	30.5589	46.8606
Ef-Kr-Sr_synthetic	AGACCATCT	NA	NA	NA	NA
Ef-Kr-Sr_synthetic	AGCTCACCT	NA	NA	NA	NA
Ef-Kr-Sr_synthetic	CAACACTAA	NA	NA	NA	NA
Ef-Kr-Sr_synthetic	CTTAGCCGC	NA	NA	NA	NA
Ef-Kr-Sr_synthetic	TATATAGCC	NA	NA	NA	NA
Ef-Kr-Sr_synthetic	TGTACAGTA	NA	NA	NA	NA
Ef-Kr-Sr_synthetic	TTATCTACG	NA	NA	NA	NA
Ef-Kr_synthetic	AGTAAAGCC	64.4923	61.6202	58.2625	147.486
Ef-Kr_synthetic	AGTCTGTCG	NA	NA	NA	NA
Ef-Kr_synthetic	CAAGCGGAA	NA	NA	NA	NA
Ef-Kr_synthetic	CCTTGACAC	NA	0.735324	0.69452	NA
Ef-Kr_synthetic	CGACCGGAA	NA	NA	NA	NA
Ef-Kr_synthetic	CTGACACAT	NA	NA	NA	NA
Ef-Kr_synthetic	GAATACATG	25.5772	14.1182	15.0479	63.5639
Ef-Kr_synthetic	GTGTACAAA	NA	NA	NA	NA
Ef-Of-Kf-Sf_synthetic	ACCCGTATC	159.818	199.346	193.077	144.948
Ef-Of-Kf-Sf_synthetic	AGTCCGCGT	389.229	392.59	370.565	462.412
Ef-Of-Kf-Sf_synthetic	ATGGTGTAG	137.772	143.756	170.852	155.356
Ef-Of-Kf-Sf_synthetic	CGTCCTAGT	82.7729	83.7534	82.7251	76.1548
Ef-Of-Kf-Sf_synthetic	GTGTCAAAT	380.834	377.589	364.469	415.348
Ef-Of-Kf-Sf_synthetic	TCTAGTGCT	120.433	118.02	118.609	165.865
Ef-Of-Kf-Sf_synthetic	TGCTAGCAT	180.296	175.742	156.884	259.536
Ef-Of-Kf-Sf_synthetic	TTTGTGTGC	414.414	425.459	402.744	361.583
Ef-Of-Kf-Sr_synthetic	ATTACAGGA	238.904	275.673	288.612	221.153
Ef-Of-Kf-Sr_synthetic	CATGATCCC	479.22	488.035	496.813	329.293
Ef-Of-Kf-Sr_synthetic	CCGAAGTGC	114.862	155.227	149.322	86.0041
Ef-Of-Kf-Sr_synthetic	CGCCTCAAG	184.297	207.582	220.549	187.392
Ef-Of-Kf-Sr_synthetic	CGGAACAGG	518.292	496.123	558.317	281.468
Ef-Of-Kf-Sr_synthetic	GCATTGCCA	740.72	744.516	720.757	544.608
Ef-Of-Kf-Sr_synthetic	GTGCTGTGC	433.793	409.208	426.281	354.323
Ef-Of-Kf-Sr_synthetic	TGCGCACCT	81.2822	72.65	73.1561	229.124
Ef-Of-Kf_synthetic	AAAGCTAGA	104.976	114.858	92.8342	144.846
Ef-Of-Kf_synthetic	AGACAAGGA	99.4844	122.726	110.12	126.772
Ef-Of-Kf_synthetic	AGATGACTC	400.135	415.164	374.732	504.348
Ef-Of-Kf_synthetic	GAGGAGTCC	330.229	289.865	273.024	496.682
Ef-Of-Kf_synthetic	GCTTCGTAA	322.932	290.012	311.145	426.111
Ef-Of-Kf_synthetic	GTTGGAATC	127.729	153.462	144.229	223.489
Ef-Of-Kf_synthetic	TCCTCGCTT	111.881	92.5038	96.5383	181.959
Ef-Of-Kf_synthetic	TTTGCCGAC	228.547	228.98	258.593	197.698
Ef-Of-Kr-Sf_synthetic	AGGCTCGTT	306.927	262.511	276.573	292.841
Ef-Of-Kr-Sf_synthetic	AGTACGTAA	638.332	571.126	584.632	483.989
Ef-Of-Kr-Sf_synthetic	ATTCAGAGT	404.293	475.608	416.018	435.25
Ef-Of-Kr-Sf_synthetic	CACGTGCTC	332.112	335.014	346.411	397.985
Ef-Of-Kr-Sf_synthetic	CACTCCCAA	154.876	150.594	165.527	151.903
Ef-Of-Kr-Sf_synthetic	CCAAATCGG	174.882	172.801	153.566	113.166
Ef-Of-Kr-Sf_synthetic	TAGGAGGCG	105.212	105.225	102.789	104.332
Ef-Of-Kr-Sf_synthetic	TCCCATACA	206.893	201.846	205.038	185.412
Ef-Of-Kr-Sr_synthetic	AACTCCACC	335.407	355.529	361.459	246.538
Ef-Of-Kr-Sr_synthetic	AATATGCGG	444.463	485.682	420.725	319.545
Ef-Of-Kr-Sr_synthetic	ATCTTGACT	431.047	442.886	442.949	332.695
Ef-Of-Kr-Sr_synthetic	CACTGGGAA	578.234	596.863	624.759	371.534
Ef-Of-Kr-Sr_synthetic	CTAGGCCTC	392.995	359.868	373.497	215.975
Ef-Of-Kr-Sr_synthetic	GCATGTGGC	733.031	685.249	677.929	672.548
Ef-Of-Kr-Sr_synthetic	GGTTCGATT	114.391	98.0187	116.294	104.078
Ef-Of-Kr-Sr_synthetic	TAGCTGTTC	750.37	717.309	720.603	473.277
Ef-Of-Kr_synthetic	ATCGTTCTT	94.3847	105.298	83.6511	101.997
Ef-Of-Kr_synthetic	CTTGGTGCC	NA	NA	NA	NA
Ef-Of-Kr_synthetic	GCACAGCAA	396.212	394.869	361.845	252.478
Ef-Of-Kr_synthetic	GCCAACACG	5.33513	4.26488	3.62694	6.60008
Ef-Of-Kr_synthetic	GCTATGTCA	NA	NA	NA	NA
Ef-Of-Kr_synthetic	GCTCGTCAC	221.957	223.391	200.022	221.966
Ef-Of-Kr_synthetic	GGACTACGC	41.818	54.414	47.073	57.5222
Ef-Of-Kr_synthetic	TCGGAACTC	195.517	198.685	210.903	168.048
Ef-Of-Sf-Kf_synthetic	AATTATGCC	53.4297	39.7075	32.8739	51.176
Ef-Of-Sf-Kf_synthetic	AGGCACCAT	16.633	22.7215	17.1315	29.1419
Ef-Of-Sf-Kf_synthetic	CAAGCGCGA	85.1267	73.0912	80.4872	95.6504
Ef-Of-Sf-Kf_synthetic	CCGTTGGCA	147.108	145.741	134.505	154.442
Ef-Of-Sf-Kf_synthetic	CTCGATGAC	200.303	201.846	198.17	236.791
Ef-Of-Sf-Kf_synthetic	GCGATAAGA	564.033	511.712	493.649	777.236
Ef-Of-Sf-Kf_synthetic	TTACAAGCA	177.471	206.332	237.372	221.763
Ef-Of-Sf-Kf_synthetic	TTAGGGAAA	282.762	268.099	246.863	277.203
Ef-Of-Sf-Kr_synthetic	AATGCGACG	197.949	233.465	225.024	219.224
Ef-Of-Sf-Kr_synthetic	ACAGTCACA	2.58911	2.05891	7.25388	7.20932
Ef-Of-Sf-Kr_synthetic	AGCCAAACG	75.0056	67.5028	78.2493	93.3658
Ef-Of-Sf-Kr_synthetic	AGTCCCGCT	124.12	129.27	148.087	136.723
Ef-Of-Sf-Kr_synthetic	CGTAAGATG	218.27	186.258	230.889	175.359
Ef-Of-Sf-Kr_synthetic	CTACTCGAT	74.221	67.5763	79.2525	76.9671
Ef-Of-Sf-Kr_synthetic	GACCAGGAC	70.2197	71.6941	52.0118	63.5639
Ef-Of-Sf-Kr_synthetic	GGGCGGTAT	31.54	31.0307	21.8388	33.2035
Ef-Of-Sf_synthetic	CACCTGACC	101.446	71.9882	72.3073	273.294
Ef-Of-Sf_synthetic	CAGGAACTC	92.031	67.944	69.6063	219.427
Ef-Of-Sf_synthetic	CGGCTGAAC	52.0175	25.2952	44.5265	126.366
Ef-Of-Sf_synthetic	CTCTTCCGG	25.8911	19.4126	18.4434	46.9113
Ef-Of-Sf_synthetic	CTGTGAGTC	7.13966	4.11782	3.70411	17.8202
Ef-Of-Sf_synthetic	TAGAGGTGA	96.5031	80.2239	83.1881	304.264
Ef-Of-Sf_synthetic	TAGGCATGA	78.1439	74.2677	75.4712	287.357
Ef-Of-Sf_synthetic	TGCCGATTA	124.591	100.592	119.072	406.413
Ef-Of-Sr-Kf_synthetic	AAATCCACT	184.611	191.625	172.781	166.017
Ef-Of-Sr-Kf_synthetic	AACCCTCTT	10.8272	22.2803	10.495	15.0786
Ef-Of-Sr-Kf_synthetic	AGGCGTGTT	654.73	730.765	665.427	661.125
Ef-Of-Sr-Kf_synthetic	ATCAGGCAT	278.054	313.542	277.499	306.193
Ef-Of-Sr-Kf_synthetic	CATGCCTGC	170.175	155.08	167.611	155.762
Ef-Of-Sr-Kf_synthetic	CTGTTTGGC	304.808	274.276	279.814	214.909
Ef-Of-Sr-Kf_synthetic	GACAATGTT	166.095	184.566	132.345	183.736
Ef-Of-Sr-Kf_synthetic	TGTCAACCA	80.4192	77.2826	77.4004	86.1564
Ef-Of-Sr-Kr_synthetic	AACTAATCC	NA	NA	NA	NA
Ef-Of-Sr-Kr_synthetic	ACCGTAGCC	NA	NA	NA	NA
Ef-Of-Sr-Kr_synthetic	CACTCTGAA	26.2834	39.1192	30.4045	25.8419
Ef-Of-Sr-Kr_synthetic	CCTCCCATA	NA	NA	NA	NA
Ef-Of-Sr-Kr_synthetic	GCCTGGAGT	182.885	192.655	176.871	126.772
Ef-Of-Sr-Kr_synthetic	GTAACGCCA	NA	NA	0.385844	NA
Ef-Of-Sr-Kr_synthetic	TACCACAAT	NA	NA	NA	NA
Ef-Of-Sr-Kr_synthetic	TTCGATGCC	18.5945	22.648	16.7457	19.0387
Ef-Of-Sr_synthetic	AGGGACAGT	70.3766	63.532	62.1981	230.495
Ef-Of-Sr_synthetic	CTATCACAC	21.0267	21.8391	31.2534	104.231
Ef-Of-Sr_synthetic	GCCCGACTA	76.9671	68.5322	65.4392	79.861
Ef-Of-Sr_synthetic	GCCCTATCA	119.727	110.887	116.216	371.483
Ef-Of-Sr_synthetic	GTCAAGTAG	16.9469	8.08857	10.1863	56.6084
Ef-Of-Sr_synthetic	GTCATACAG	272.955	212.067	256.124	434.641
Ef-Of-Sr_synthetic	GTCTTGGCG	57.2742	45.9578	70.378	229.226
Ef-Of-Sr_synthetic	TAAACCTAC	154.248	159.345	161.823	420.324
Ef-Of_synthetic	CTCCGATGG	56.4111	40.5899	56.7191	145.354
Ef-Of_synthetic	GCTCTCACG	NA	NA	4.32146	NA
Ef-Of_synthetic	GCTGAACCA	17.0253	18.4566	19.1379	68.4885
Ef-Of_synthetic	GGAGTGATC	134.869	124.123	133.734	593.957
Ef-Of_synthetic	GTTAGCGCA	136.752	112.872	127.946	618.58
Ef-Of_synthetic	TACCTTGGT	54.5281	60.8848	40.5137	205.466
Ef-Of_synthetic	TGAGAGACT	12.3179	13.8241	5.86484	39.042
Ef-Of_synthetic	TGCTACATT	1.96144	0.367662	0.69452	5.3816
Ef-Or-Kf-Sf_synthetic	ACACACAGG	176.53	165.595	170.543	154.188
Ef-Or-Kf-Sf_synthetic	ATACCCGGT	513.585	581.494	569.815	427.178
Ef-Or-Kf-Sf_synthetic	CACAGCCTG	1.01995	0.661792	1.77488	2.08156
Ef-Or-Kf-Sf_synthetic	CACTTTGTA	182.728	195.964	182.427	243.035
Ef-Or-Kf-Sf_synthetic	CGCCACAGT	366.947	288.541	354.668	275.376
Ef-Or-Kf-Sf_synthetic	CTAGCAGGT	151.188	150.889	159.431	123.98
Ef-Or-Kf-Sf_synthetic	GACCGCGTA	306.927	326.705	302.656	236.486
Ef-Or-Kf-Sf_synthetic	TCGGTCGAA	100.583	135.667	120.229	98.5951
Ef-Or-Kf-Sr_synthetic	AGGCTACTC	311.477	275.747	306.824	227.601
Ef-Or-Kf-Sr_synthetic	AGTCTGATG	372.282	373.618	346.951	303.147
Ef-Or-Kf-Sr_synthetic	ATTGCATCA	340.977	373.471	349.266	294.77
Ef-Or-Kf-Sr_synthetic	GATCAGATA	134.084	135.3	121.464	97.5289
Ef-Or-Kf-Sr_synthetic	GTCTTGCGG	692.154	599.951	674.302	410.576
Ef-Or-Kf-Sr_synthetic	GTGCATGGT	428.536	378.324	416.481	366.558
Ef-Or-Kf-Sr_synthetic	TACCTACGA	81.0469	99.1217	100.628	82.1964
Ef-Or-Kf-Sr_synthetic	TTCTCCGCT	308.967	301.63	313.692	182.873
Ef-Or-Kf_synthetic	AAGCATTGG	157.465	156.918	156.421	256.997
Ef-Or-Kf_synthetic	ACTACGCAG	278.917	314.939	286.837	420.476
Ef-Or-Kf_synthetic	CCATATGTT	47.1531	44.7812	48.4621	92.8073
Ef-Or-Kf_synthetic	GCAGGTAGG	210.031	148.241	166.299	673.31
Ef-Or-Kf_synthetic	GTCCAGTTG	89.2065	90.2978	69.0662	139.668
Ef-Or-Kf_synthetic	TACAGATTC	236.786	259.496	228.729	293.044
Ef-Or-Kf_synthetic	TGTTCCCAT	245.416	210.156	218.465	446.318
Ef-Or-Kf_synthetic	TTGTTTCTG	119.177	123.387	95.0721	134.54
Ef-Or-Kr-Sf_synthetic	ACGCTGCCT	278.917	264.202	283.827	238.974
Ef-Or-Kr-Sf_synthetic	AGCCTATCG	92.031	100.445	98.3903	73.4132
Ef-Or-Kr-Sf_synthetic	ATCCATGCA	316.342	367.074	345.408	365.543
Ef-Or-Kr-Sf_synthetic	CGTTTCCGG	42.4457	35.8838	41.0539	18.7341
Ef-Or-Kr-Sf_synthetic	CTTATTGAG	207.05	195.89	232.047	167.744
Ef-Or-Kr-Sf_synthetic	CTTGCATTC	181.002	167.58	191.07	144.288
Ef-Or-Kr-Sf_synthetic	GCGCTGTAG	156.052	168.83	165.836	155.66
Ef-Or-Kr-Sf_synthetic	TTTCCCATC	4.78592	6.83851	13.4274	7.86933
Ef-Or-Kr-Sr_synthetic	AAGCCATTA	75.8687	99.7835	89.9789	53.9684
Ef-Or-Kr-Sr_synthetic	ATGTAGCCT	159.975	152.212	169.154	122.762
Ef-Or-Kr-Sr_synthetic	CAGTTTGAC	337.918	308.616	349.266	201.252
Ef-Or-Kr-Sr_synthetic	CGCTTTAGC	301.513	308.321	383.221	224.961
Ef-Or-Kr-Sr_synthetic	GAACTCCCA	256.871	250.525	258.284	194.855
Ef-Or-Kr-Sr_synthetic	GCCAATTTC	500.325	537.228	542.96	343.458
Ef-Or-Kr-Sr_synthetic	GGTTGGACT	433.871	458.695	473.045	363.411
Ef-Or-Kr-Sr_synthetic	TCATGCACG	529.119	573.259	586.484	409.307
Ef-Or-Kr_synthetic	ATAGTCCTT	1.17687	2.13244	3.24109	2.99542
Ef-Or-Kr_synthetic	CATTTGCCG	134.32	121.917	138.981	178.507
Ef-Or-Kr_synthetic	CGACATGAG	NA	NA	NA	NA
Ef-Or-Kr_synthetic	GACCACTTA	96.2677	112.137	105.336	135.657
Ef-Or-Kr_synthetic	GGGACCGAA	231.843	272.143	250.413	420.933
Ef-Or-Kr_synthetic	GGGTCTTCG	166.174	173.757	124.936	219.58
Ef-Or-Kr_synthetic	GGTTGTGAC	192.222	153.462	183.122	229.327
Ef-Or-Kr_synthetic	TGGTCTAGG	280.722	278.173	264.689	264.206
Ef-Or-Sf-Kf_synthetic	AGTGATCTG	0.549204	2.57363	2.31507	2.43695
Ef-Or-Sf-Kf_synthetic	CCAATATGG	192.457	199.567	206.272	161.093
Ef-Or-Sf-Kf_synthetic	CCTATTATC	116.588	115.078	118.994	83.5672
Ef-Or-Sf-Kf_synthetic	CGTCGACAG	289.823	230.083	298.181	277.61
Ef-Or-Sf-Kf_synthetic	CTTTGCAAT	653.318	634.879	726.159	678.082
Ef-Or-Sf-Kf_synthetic	GTGCGCGTT	233.02	230.23	202.723	191.555
Ef-Or-Sf-Kf_synthetic	TGCAAGATT	292.883	303.395	307.827	231.561
Ef-Or-Sf-Kf_synthetic	TGTGTAGGT	723.302	630.908	665.659	674.985
Ef-Or-Sf-Kr_synthetic	AAGCGAGGG	NA	NA	NA	NA
Ef-Or-Sf-Kr_synthetic	ACACAGACG	41.1903	35.6632	40.668	26.7049
Ef-Or-Sf-Kr_synthetic	ATCGTGAAG	289.666	321.851	304.277	236.537
Ef-Or-Sf-Kr_synthetic	CGCATGGTA	4.23672	7.42677	7.48538	3.80774
Ef-Or-Sf-Kr_synthetic	CTGCAGGCT	24.9496	32.5749	34.1858	19.9526
Ef-Or-Sf-Kr_synthetic	TACGACAGA	30.677	37.9427	30.0187	22.288
Ef-Or-Sf-Kr_synthetic	TCGTGTCTC	NA	NA	NA	NA
Ef-Or-Sf-Kr_synthetic	TGGCCATTC	NA	NA	NA	NA
Ef-Or-Sf_synthetic	AACCCAATA	160.368	125.446	103.715	413.673
Ef-Or-Sf_synthetic	CCATCGGTC	67.1598	64.0467	55.6388	202.927
Ef-Or-Sf_synthetic	CTACAAGTG	66.6106	62.5026	66.6739	206.278
Ef-Or-Sf_synthetic	GCTAGCAAA	54.2143	49.0461	59.3429	192.469
Ef-Or-Sf_synthetic	GGAAGAAAG	70.4551	63.7526	62.6611	230.851
Ef-Or-Sf_synthetic	GGCCTTAAT	120.276	101.548	115.599	396.513
Ef-Or-Sf_synthetic	TAAAGCGCG	211.365	207.361	177.025	648.026
Ef-Or-Sf_synthetic	TAGCGGCCA	78.7716	55.8111	74.3908	205.872
Ef-Or-Sr-Kf_synthetic	AACCATCTA	15.3777	42.2076	25.6972	25.9434
Ef-Or-Sr-Kf_synthetic	ACCACGTTC	281.271	267.732	265.693	258.165
Ef-Or-Sr-Kf_synthetic	CATTCATGA	447.915	505.021	505.225	355.998
Ef-Or-Sr-Kf_synthetic	CTATGGGAG	175.118	136.182	177.257	141.445
Ef-Or-Sr-Kf_synthetic	GCTTTAGCT	494.441	508.771	465.328	410.728
Ef-Or-Sr-Kf_synthetic	TAGCGTCTA	75.7117	93.1656	87.8954	49.6021
Ef-Or-Sr-Kf_synthetic	TGTGGGCTT	153.463	135.447	141.991	107.835
Ef-Or-Sr-Kf_synthetic	TTTGCTGGG	783.558	812.827	857.038	486.172
Ef-Or-Sr-Kr_synthetic	ACCCAACCT	31.2262	30.0748	23.8452	24.5218
Ef-Or-Sr-Kr_synthetic	ACTGCAAAT	39.3073	36.5456	24.3854	25.7911
Ef-Or-Sr-Kr_synthetic	AGCTAGGGA	271.778	296.997	308.83	226.586
Ef-Or-Sr-Kr_synthetic	CCAGCAGTC	1.17687	1.02945	4.01278	0.812318
Ef-Or-Sr-Kr_synthetic	CCGGAATAG	10.4349	18.8978	23.8452	14.8248
Ef-Or-Sr-Kr_synthetic	GATGTTTCC	NA	NA	NA	NA
Ef-Or-Sr-Kr_synthetic	GTTAGATCT	37.8166	28.31	41.7484	24.9788
Ef-Or-Sr-Kr_synthetic	GTTCAGTGT	93.3647	107.357	84.0369	73.0578
Ef-Or-Sr_synthetic	AGGCTATTG	59.3141	52.208	63.4328	187.696
Ef-Or-Sr_synthetic	CGTTGATGT	95.0124	65.0762	68.526	230.546
Ef-Or-Sr_synthetic	GAACGGAAA	87.6373	94.5627	86.815	268.623
Ef-Or-Sr_synthetic	GATCGTAAA	34.3645	33.6778	35.1118	114.689
Ef-Or-Sr_synthetic	GCAAGACCG	119.883	82.0622	77.7091	265.476
Ef-Or-Sr_synthetic	GCTCCTTGA	137.144	80.9592	89.5931	385.952
Ef-Or-Sr_synthetic	GGTCCCATT	69.1997	60.3701	68.6803	259.383
Ef-Or-Sr_synthetic	TAGGACATA	65.1199	78.8268	74.2365	214.198
Ef-Or_synthetic	AACACGACT	75.3979	70.9588	59.1114	256.388
Ef-Or_synthetic	ACATGGGTA	31.54	24.854	49.2338	112.861
Ef-Or_synthetic	ACGGGTGAA	187.436	138.388	149.553	517.193
Ef-Or_synthetic	CATATAGGC	10.4349	7.79444	18.1347	60.9746
Ef-Or_synthetic	CATGCCACC	8.63035	4.04428	12.9644	32.2389
Ef-Or_synthetic	GCTATAGGT	28.1663	17.4272	35.2662	145.202
Ef-Or_synthetic	GTTACTTCT	NA	NA	3.4726	NA
Ef-Or_synthetic	TCCTAAAGG	78.4578	80.0033	77.6319	58.4361
Ef-Sf-Kf-Of_synthetic	ACACGCATG	334.936	366.633	374.269	195.769
Ef-Sf-Kf-Of_synthetic	ATTCTGGCA	382.717	426.341	430.294	286.19
Ef-Sf-Kf-Of_synthetic	CACGGGTCA	15.8485	15.8095	8.79725	10.7124
Ef-Sf-Kf-Of_synthetic	CCGACAGAC	79.2423	94.2686	95.9981	41.022
Ef-Sf-Kf-Of_synthetic	CTGGGTAAG	171.195	176.478	168.691	234.201
Ef-Sf-Kf-Of_synthetic	CTTCCGCAC	1106.96	1172.18	1119.1	583.396
Ef-Sf-Kf-Of_synthetic	GCGACGACT	197.635	208.759	199.327	197.749
Ef-Sf-Kf-Of_synthetic	GTCAGATTG	435.205	398.693	445.265	260.957
Ef-Sf-Kf-Or_synthetic	AAGCTCCCA	NA	NA	1.0032	NA
Ef-Sf-Kf-Or_synthetic	AGAGCTAGC	16.8684	14.9271	15.974	20.6126
Ef-Sf-Kf-Or_synthetic	CAAGCTAGT	15.1423	27.2805	19.6781	13.5556
Ef-Sf-Kf-Or_synthetic	CAGGTGAGA	397.624	375.824	384.764	139.972
Ef-Sf-Kf-Or_synthetic	CGGTTCATC	28.9509	26.5452	26.1603	11.8294
Ef-Sf-Kf-Or_synthetic	CTCCAACCA	14.9854	15.2947	15.4338	35.082
Ef-Sf-Kf-Or_synthetic	GAGAACTGC	80.4192	89.4154	79.484	37.6205
Ef-Sf-Kf-Or_synthetic	TATGCGCCA	33.8938	38.0163	38.5844	25.4865
Ef-Sf-Kf_synthetic	AAGTCCAGT	165.232	154.492	153.72	242.274
Ef-Sf-Kf_synthetic	AGAGCCGAT	NA	NA	NA	NA
Ef-Sf-Kf_synthetic	CACATCCGC	65.0415	70.1499	80.4872	103.52
Ef-Sf-Kf_synthetic	CATGCCAAA	7.13966	11.6917	7.87123	15.7387
Ef-Sf-Kf_synthetic	GCGTTGTCA	186.729	186.184	177.797	333.456
Ef-Sf-Kf_synthetic	GTAAGAGCA	76.4963	77.4296	83.8054	127.534
Ef-Sf-Kf_synthetic	TTTCATAGC	67.0814	61.326	66.9054	121.594
Ef-Sf-Kf_synthetic	TTTGAGAGT	335.956	311.263	330.977	454.695
Ef-Sf-Kr-Of_synthetic	AGCCGTCGT	151.816	159.051	136.203	66.2547
Ef-Sf-Kr-Of_synthetic	CGCATTCCG	2.9814	3.30896	3.4726	9.5955
Ef-Sf-Kr-Of_synthetic	CTAACACGT	18.7514	11.9123	10.1091	5.2293
Ef-Sf-Kr-Of_synthetic	CTGCGGTAT	511.309	538.257	573.442	267.456
Ef-Sf-Kr-Of_synthetic	TACGGTCCA	NA	NA	NA	NA
Ef-Sf-Kr-Of_synthetic	TCTAATGAG	8.78727	14.5594	15.7425	4.26467
Ef-Sf-Kr-Of_synthetic	TGGACAGCG	1075.89	1142.25	1074.11	508.105
Ef-Sf-Kr-Of_synthetic	TTGTAGGTA	344.587	381.045	391.632	167.49
Ef-Sf-Kr-Or_synthetic	ACATGGCCG	120.747	149.124	157.888	132.509
Ef-Sf-Kr-Or_synthetic	AGACGCGTG	164.997	216.479	174.556	82.9579
Ef-Sf-Kr-Or_synthetic	AGCGCCATC	51.2329	45.8107	49.5424	24.6742
Ef-Sf-Kr-Or_synthetic	ATTCAACCT	100.426	106.328	85.426	48.3329
Ef-Sf-Kr-Or_synthetic	GCCACGTTG	72.2596	80.0033	83.1109	37.6205
Ef-Sf-Kr-Or_synthetic	GTATGTGTG	488.086	466.71	517.803	290.099
Ef-Sf-Kr-Or_synthetic	TCAGACCGA	61.5893	76.8414	72.3073	33.5081
Ef-Sf-Kr-Or_synthetic	TTCACGTAC	99.2491	80.5915	89.5931	44.6775
Ef-Sf-Kr_synthetic	AATTCGCCG	215.288	258.687	224.484	338.99
Ef-Sf-Kr_synthetic	CACATGGCC	29.4217	12.7211	20.7584	28.3296
Ef-Sf-Kr_synthetic	CAGCCATAA	19.2222	17.6478	10.1863	17.5664
Ef-Sf-Kr_synthetic	GCCTCTAAA	35.1491	28.31	23.6137	35.1835
Ef-Sf-Kr_synthetic	TCTCGCATT	123.963	138.903	148.087	156.422
Ef-Sf-Kr_synthetic	TGCAAACAC	NA	NA	NA	NA
Ef-Sf-Kr_synthetic	TGGATGGAG	229.411	190.596	205.887	264.917
Ef-Sf-Kr_synthetic	TTTGCTTCT	188.848	193.758	176.794	205.618
Ef-Sf-Of-Kf_synthetic	ACACTGGGC	477.965	552.376	507.617	253.139
Ef-Sf-Of-Kf_synthetic	ACCGGGAAG	993.903	1082.62	999.337	393.213
Ef-Sf-Of-Kf_synthetic	ACTTGGCTT	507.465	523.257	561.327	272.533
Ef-Sf-Of-Kf_synthetic	CCACTAAAG	41.6611	58.8995	60.5004	34.7266
Ef-Sf-Of-Kf_synthetic	CTAATACTG	142.009	155.448	197.707	86.4103
Ef-Sf-Of-Kf_synthetic	CTGGCAGAT	94.2278	66.1792	119.689	43.0021
Ef-Sf-Of-Kf_synthetic	CTGTTAGCG	147.971	130.52	123.47	66.7116
Ef-Sf-Of-Kf_synthetic	GTTTAGCTG	543.634	548.846	585.172	278.574
Ef-Sf-Of-Kr_synthetic	CTACAGGGA	635.822	649.512	701.388	311.27
Ef-Sf-Of-Kr_synthetic	CTAGTCAGG	17.1038	11.8387	18.1347	8.07241
Ef-Sf-Of-Kr_synthetic	CTGTTAAAC	74.2995	71.1794	81.1817	25.1818
Ef-Sf-Of-Kr_synthetic	GTAATTGGA	287.94	275.747	317.01	124.132
Ef-Sf-Of-Kr_synthetic	GTCGGAACC	2.35373	1.25005	2.16073	1.67541
Ef-Sf-Of-Kr_synthetic	TATGAGAGA	284.409	358.25	303.968	223.844
Ef-Sf-Of-Kr_synthetic	TCTGCCGCT	55.3912	40.3693	56.4105	39.9051
Ef-Sf-Of-Kr_synthetic	TTAGACCTG	229.254	212.509	234.593	63.6146
Ef-Sf-Of_synthetic	AGGTAGGAT	62.0601	49.1197	59.3429	196.632
Ef-Sf-Of_synthetic	CATGAGCGA	209.247	195.082	207.584	670.517
Ef-Sf-Of_synthetic	CATGTAGTC	30.1278	38.3839	36.8867	53.6637
Ef-Sf-Of_synthetic	CTTGAATTG	75.0056	67.8704	85.1945	227.094
Ef-Sf-Of_synthetic	GTTCTCGTT	130.005	105.372	94.9177	349.043
Ef-Sf-Of_synthetic	TAGCCTTGT	86.2251	66.5468	74.931	198.459
Ef-Sf-Of_synthetic	TCCGGACAT	42.5241	43.4577	49.6968	136.723
Ef-Sf-Of_synthetic	TTGGATACT	88.8142	58.4583	83.8826	236.994
Ef-Sf-Or-Kf_synthetic	ACTCACAGC	33.8938	21.4715	23.9995	19.6987
Ef-Sf-Or-Kf_synthetic	ACTCGAACG	60.9617	81.1063	74.468	54.3745
Ef-Sf-Or-Kf_synthetic	CCGGTGATA	271.385	278.32	284.213	160.23
Ef-Sf-Or-Kf_synthetic	CGCAACTTG	100.347	56.1052	84.963	60.5684
Ef-Sf-Or-Kf_synthetic	GAAGCATAG	317.362	299.865	292.316	311.828
Ef-Sf-Or-Kf_synthetic	GATTTACCC	656.535	632.967	635.177	595.277
Ef-Sf-Or-Kf_synthetic	GTGTTGTAT	26.5187	28.6041	23.4593	90.218
Ef-Sf-Or-Kf_synthetic	TCGACACCG	146.716	119.637	142.762	133.068
Ef-Sf-Or-Kr_synthetic	ACTCTCCTG	62.6878	84.9299	86.1205	38.5851
Ef-Sf-Or-Kr_synthetic	CGATGTGAC	42.6026	43.2371	38.6616	31.4265
Ef-Sf-Or-Kr_synthetic	GCATAAGTT	26.048	23.1627	27.0091	21.3233
Ef-Sf-Or-Kr_synthetic	GCGCTCACA	299.395	307.88	314.772	140.886
Ef-Sf-Or-Kr_synthetic	GTTGTACTT	96.4246	77.209	109.734	58.3853
Ef-Sf-Or-Kr_synthetic	TGGAACAAT	318.617	332.514	338.54	254.662
Ef-Sf-Or-Kr_synthetic	TGGCATTCG	18.2022	14.633	5.86484	8.98626
Ef-Sf-Or-Kr_synthetic	TGTTCTCAC	NA	NA	NA	NA
Ef-Sf-Or_synthetic	ATAGTCGAA	83.4791	73.3118	59.42	245.828
Ef-Sf-Or_synthetic	CGTCTACAA	238.747	208.979	241.77	519.223
Ef-Sf-Or_synthetic	GGCCGAGTA	84.5775	65.9586	81.336	289.49
Ef-Sf-Or_synthetic	GGCGTCGTA	285.508	227.656	246.323	892.382
Ef-Sf-Or_synthetic	GTGATCCAA	85.9113	59.1936	64.5132	270.045
Ef-Sf-Or_synthetic	GTGATTCGA	197.007	171.992	148.55	642.543
Ef-Sf-Or_synthetic	TGTAGGCCA	NA	NA	NA	NA
Ef-Sf-Or_synthetic	TGTGGAGGC	93.2078	68.9734	78.5579	285.784
Ef-Sf_synthetic	AATGCACAT	110.469	118.608	101.4	514.806
Ef-Sf_synthetic	AGCGACCAT	83.3221	62.3555	60.0374	292.739
Ef-Sf_synthetic	AGGTTAAGG	53.5867	51.3256	39.9735	183.482
Ef-Sf_synthetic	CATAACACG	139.812	129.049	123.547	475.257
Ef-Sf_synthetic	CCAATGCGG	53.2728	56.4729	42.5972	190.692
Ef-Sf_synthetic	GGGTGAGTG	57.7449	41.3252	52.6292	228.16
Ef-Sf_synthetic	TGAAGAAAC	1.17687	2.64717	0.617351	7.51394
Ef-Sf_synthetic	TGTATTGGA	146.402	113.461	124.088	567.912
Ef-Sr-Kf-Of_synthetic	AGAATCTGG	2.82448	4.26488	5.09315	2.38618
Ef-Sr-Kf-Of_synthetic	ATAGCAGGC	271.307	274.791	252.574	206.379
Ef-Sr-Kf-Of_synthetic	CTCCAGATG	NA	NA	NA	NA
Ef-Sr-Kf-Of_synthetic	GATCTTGTA	336.505	349.426	292.547	197.342
Ef-Sr-Kf-Of_synthetic	TCATGTTTC	790.148	909.817	827.405	368.538
Ef-Sr-Kf-Of_synthetic	TCGCCGATA	546.301	551.64	570.278	299.999
Ef-Sr-Kf-Of_synthetic	TCTAACCCT	257.577	228.245	248.252	106.211
Ef-Sr-Kf-Of_synthetic	TTGCACAGG	386.64	357.441	342.784	252.478
Ef-Sr-Kf-Or_synthetic	AGCAACATA	40.4842	44.8548	42.2886	21.9326
Ef-Sr-Kf-Or_synthetic	AGGGCAGGT	365.221	410.311	376.121	221.255
Ef-Sr-Kf-Or_synthetic	CCTGGTTTC	446.425	402.516	465.869	166.931
Ef-Sr-Kf-Or_synthetic	GAATTGCTA	553.598	595.686	569.429	415.957
Ef-Sr-Kf-Or_synthetic	GATTCCTCG	175.275	177.287	158.196	147.436
Ef-Sr-Kf-Or_synthetic	GGAAGGTCT	37.8951	37.2074	29.247	40.362
Ef-Sr-Kf-Or_synthetic	TCTCTTAGG	517.821	593.407	586.021	215.67
Ef-Sr-Kf-Or_synthetic	TTTCTGAAC	301.592	277.07	312.997	171.704
Ef-Sr-Kf_synthetic	AGCAACGCT	116.117	117.431	116.139	169.724
Ef-Sr-Kf_synthetic	AGCAACTAC	468.001	462.887	482.614	631.374
Ef-Sr-Kf_synthetic	ATGTGCCAA	323.403	293.836	303.197	499.728
Ef-Sr-Kf_synthetic	GAGGGTTAC	244.239	202.729	227.803	356.912
Ef-Sr-Kf_synthetic	GTAGTTATG	348.588	357.368	366.861	465.966
Ef-Sr-Kf_synthetic	GTCTATGGA	199.126	194.273	219.777	277.305
Ef-Sr-Kf_synthetic	TACGCCCAT	9.80722	4.26488	8.25707	13.2002
Ef-Sr-Kf_synthetic	TCGCAACCC	141.146	182.655	167.842	191.047
Ef-Sr-Kr-Of_synthetic	ATCTTCCCG	501.737	574.95	544.272	244.203
Ef-Sr-Kr-Of_synthetic	CGATCTTAC	29.5786	20.5891	20.1411	19.4449
Ef-Sr-Kr-Of_synthetic	CTACTAAGA	534.768	483.549	520.581	255.626
Ef-Sr-Kr-Of_synthetic	CTATGCTAA	402.253	400.531	423.04	212.37
Ef-Sr-Kr-Of_synthetic	CTCTATCTA	NA	0.441195	1.08036	NA
Ef-Sr-Kr-Of_synthetic	GGCTCTGTC	370.948	348.47	370.951	210.492
Ef-Sr-Kr-Of_synthetic	GTCCGCTCA	13.024	12.3534	12.5785	14.114
Ef-Sr-Kr-Of_synthetic	TCGCATGAT	413.08	413.988	425.664	215.62
Ef-Sr-Kr-Or_synthetic	AGGTGTGGC	136.987	154.565	145.232	78.084
Ef-Sr-Kr-Or_synthetic	ATCTATCAG	4.39363	9.63275	5.17032	5.02622
Ef-Sr-Kr-Or_synthetic	ATTTGGAGC	148.521	160.815	173.399	55.4915
Ef-Sr-Kr-Or_synthetic	CATGGTGAC	9.1011	4.55901	5.942	4.56929
Ef-Sr-Kr-Or_synthetic	CCGTAGCTC	27.5387	36.7662	39.1246	21.628
Ef-Sr-Kr-Or_synthetic	GGCCAGTTC	85.4405	107.431	94.2232	54.0699
Ef-Sr-Kr-Or_synthetic	TAATTACGC	100.191	74.5619	91.2908	41.1744
Ef-Sr-Kr-Or_synthetic	TCGCCACAA	98.6999	94.195	83.4967	34.0666
Ef-Sr-Kr_synthetic	ATGAGACAG	250.829	229.348	238.066	289.896
Ef-Sr-Kr_synthetic	CTCCGAATT	133.221	103.46	105.567	127.686
Ef-Sr-Kr_synthetic	GAATACCCG	211.13	217.656	220.549	335.64
Ef-Sr-Kr_synthetic	GCCCACATC	75.241	75.0766	66.2881	72.6009
Ef-Sr-Kr_synthetic	GCGAGACTC	442.423	396.266	394.024	607.918
Ef-Sr-Kr_synthetic	GTGCATCCT	66.9245	58.0171	57.7223	110.323
Ef-Sr-Kr_synthetic	TCATGGCGA	53.822	57.0612	61.0406	68.9455
Ef-Sr-Kr_synthetic	TGTTCCGGA	105.996	115.887	125.168	149.72
Ef-Sr-Of-Kf_synthetic	CACAGCAAG	915.288	940.259	949.023	352.343
Ef-Sr-Of-Kf_synthetic	CCTGCGCAA	233.49	215.082	211.057	106.667
Ef-Sr-Of-Kf_synthetic	GCTAGGTAT	31.1477	21.9127	29.0927	14.2156
Ef-Sr-Of-Kf_synthetic	TAGACAAAG	935.844	1070.56	930.117	325.739
Ef-Sr-Of-Kf_synthetic	TGGAAGCTA	68.8859	84.1946	82.0305	33.5589
Ef-Sr-Of-Kf_synthetic	TTATGCTAC	728.873	720.618	808.884	319.393
Ef-Sr-Of-Kf_synthetic	TTCTCGACA	23.9296	17.5742	13.8904	10.8647
Ef-Sr-Of-Kf_synthetic	TTGACTATC	835.261	787.017	819.92	324.724
Ef-Sr-Of-Kr_synthetic	AACAAATCG	159.505	155.668	146.698	42.799
Ef-Sr-Of-Kr_synthetic	CGCATATAG	79.6346	65.0027	84.1913	23.608
Ef-Sr-Of-Kr_synthetic	GAGATCCCT	136.909	170.669	173.167	95.955
Ef-Sr-Of-Kr_synthetic	GCAATCCTC	79.5562	77.1355	79.3296	53.2576
Ef-Sr-Of-Kr_synthetic	GCTTGGTGA	37.5028	31.8395	27.0091	16.3479
Ef-Sr-Of-Kr_synthetic	GGGTGTTGT	205.402	200.67	203.186	93.3658
Ef-Sr-Of-Kr_synthetic	TCGTAAACG	87.0881	101.842	115.676	31.0712
Ef-Sr-Of-Kr_synthetic	TGAAGACAG	189.397	193.758	175.791	63.8177
Ef-Sr-Of_synthetic	ACGCTTCGG	94.9339	86.2535	98.3132	259.129
Ef-Sr-Of_synthetic	ACTCAAGGA	70.3766	55.8846	58.4169	234.354
Ef-Sr-Of_synthetic	CAAGCAGAT	38.3658	32.1337	39.4333	121.746
Ef-Sr-Of_synthetic	CAGAGATAC	147.971	131.623	129.412	334.776
Ef-Sr-Of_synthetic	CCGAAACTA	NA	NA	NA	NA
Ef-Sr-Of_synthetic	CTGCCAGTT	193.712	167.801	188.755	567.353
Ef-Sr-Of_synthetic	GCTCCTTCG	17.4961	15.4418	16.0511	42.5959
Ef-Sr-Of_synthetic	TCTAGTAAG	173.078	177.875	143.457	385.597
Ef-Sr-Or-Kf_synthetic	AACCTCACC	31.3831	24.3392	28.5525	29.9542
Ef-Sr-Or-Kf_synthetic	CATAGTTCC	247.927	279.57	274.413	200.693
Ef-Sr-Or-Kf_synthetic	GGTCATATG	220.388	237.804	224.021	211.152
Ef-Sr-Or-Kf_synthetic	GGTTGAGCT	468.471	444.136	457.612	419.105
Ef-Sr-Or-Kf_synthetic	GTAACGTGC	401.625	401.561	389.934	368.183
Ef-Sr-Or-Kf_synthetic	TAAAGCATG	253.654	263.614	279.583	172.821
Ef-Sr-Or-Kf_synthetic	TGCATCCCA	6.90428	7.42677	7.71689	4.31544
Ef-Sr-Or-Kf_synthetic	TTGCACTTC	290.686	317.881	295.325	263.546
Ef-Sr-Or-Kr_synthetic	ACCGGTGAT	12.3179	11.3975	6.86803	7.20932
Ef-Sr-Or-Kr_synthetic	CAACAAGTA	196.772	209.641	231.97	127.94
Ef-Sr-Or-Kr_synthetic	CATCTGAAC	50.3699	56.2523	65.5164	34.1681
Ef-Sr-Or-Kr_synthetic	CGCAGGAGA	115.568	124.27	141.991	89.7103
Ef-Sr-Or-Kr_synthetic	CGTGCCAAG	123.806	93.9009	145.078	96.7166
Ef-Sr-Or-Kr_synthetic	GACAAGGAG	168.449	142.285	134.583	104.789
Ef-Sr-Or-Kr_synthetic	GGCACTTGC	27.6956	23.1627	23.6909	43.5605
Ef-Sr-Or-Kr_synthetic	TTCGGTCAA	35.6983	36.3985	32.8739	19.2418
Ef-Sr-Or_synthetic	AAAGTCCAT	24.3219	25.7363	24.4625	97.7827
Ef-Sr-Or_synthetic	CCATTTGCC	72.9657	73.8265	64.0502	189.422
Ef-Sr-Or_synthetic	GACGTTCAA	125.219	97.5775	113.901	348.484
Ef-Sr-Or_synthetic	GGTTTGTGC	22.3605	24.4128	26.5461	79.7594
Ef-Sr-Or_synthetic	TGAAGCCTT	NA	NA	NA	NA
Ef-Sr-Or_synthetic	TGACGTTGG	115.176	96.1804	78.0178	265.679
Ef-Sr-Or_synthetic	TGTCTCTGT	72.1027	71.9882	55.4844	211.913
Ef-Sr-Or_synthetic	TTGGGTGAC	29.7355	25.5893	19.4466	86.918
Ef-Sr_synthetic	AAACGGACT	13.4947	8.67683	11.1123	50.7699
Ef-Sr_synthetic	AGAGTTGTC	29.657	22.4274	20.3726	85.1918
Ef-Sr_synthetic	AGGTTACTA	91.011	73.0912	94.9177	327.719
Ef-Sr_synthetic	ATCTTCTGT	73.9857	71.9147	80.1785	329.547
Ef-Sr_synthetic	GAGCAGACC	136.124	114.049	115.213	430.681
Ef-Sr_synthetic	GATCAGAAG	140.91	110.004	119.535	511.252
Ef-Sr_synthetic	GGGAGGCTT	46.3685	41.1046	36.8867	212.37
Ef-Sr_synthetic	TCATAGTCA	10.9056	13.8241	11.4982	50.516
EfOrOf_CMF-Scalar	AATGCGGTT	93.2078	75.959	85.0401	413.673
EfOrOf_CMF-Scalar	AGCAGTGCA	81.753	63.9732	51.8575	307.107
EfOrOf_CMF-Scalar	CGGCTCTCT	82.3022	61.9878	74.6995	257.2
EfOrOf_CMF-Scalar	GACCTAGCC	NA	NA	NA	NA
EfOrOf_CMF-Scalar	GGTCACCCA	20.399	26.2511	22.3018	107.937
EfOrOf_CMF-Scalar	TACCAGGAT	105.996	113.24	87.5095	337.467
EfOrOf_CMF-Scalar	TACTCATGG	73.9857	90.0037	53.1694	235.318
EfOrOf_CMF-Scalar	TGTTTGTAG	293.04	264.79	222.941	568.876
Er-Kf-Of-Sf_synthetic	CCAAGACTG	60.5694	65.6644	75.7799	70.4686
Er-Kf-Of-Sf_synthetic	CTAGCGTGT	182.571	190.081	201.565	214.604
Er-Kf-Of-Sf_synthetic	CTGTCCGAT	296.178	290.894	315.852	459.823
Er-Kf-Of-Sf_synthetic	GACACAGTT	174.412	134.197	137.361	178.964
Er-Kf-Of-Sf_synthetic	GGTTCATTC	41.3472	44.6342	38.5073	57.4715
Er-Kf-Of-Sf_synthetic	GTGGACTCT	392.367	349.279	384.455	490.741
Er-Kf-Of-Sf_synthetic	TCAGGCGGA	43.6225	50.3697	46.9959	57.3699
Er-Kf-Of-Sf_synthetic	TTTGGACTT	283.233	283.467	296.56	314.722
Er-Kf-Of-Sr_synthetic	ATGGTACAG	338.31	370.162	359.221	314.875
Er-Kf-Of-Sr_synthetic	CACTGCACG	185.317	150.815	145	252.478
Er-Kf-Of-Sr_synthetic	CAGAATACG	15.0639	11.4711	16.9	28.685
Er-Kf-Of-Sr_synthetic	CTCTTAGCC	359.65	331.116	405.291	346.403
Er-Kf-Of-Sr_synthetic	GAGCCGAAG	207.599	264.937	206.581	247.655
Er-Kf-Of-Sr_synthetic	TAGAGATCT	209.325	220.671	190.607	160.585
Er-Kf-Of-Sr_synthetic	TAGGCGTCA	120.433	141.035	115.059	129.971
Er-Kf-Of-Sr_synthetic	TGCGAGTGG	289.666	325.087	309.987	306.295
Er-Kf-Of_synthetic	CAGTTAGCC	NA	NA	NA	NA
Er-Kf-Of_synthetic	CGGAAGGGA	112.195	119.27	116.602	183.685
Er-Kf-Of_synthetic	GAGAGTCGC	106.389	98.9746	86.5063	155.762
Er-Kf-Of_synthetic	GCCGAATAC	152.13	137.579	163.521	235.775
Er-Kf-Of_synthetic	GGAGCATCA	246.671	256.26	234.902	473.074
Er-Kf-Of_synthetic	GTGCTAGGA	51.5468	51.8404	47.1502	135.2
Er-Kf-Of_synthetic	GTGTGGAAT	187.2	152.58	154.955	402.3
Er-Kf-Of_synthetic	TCTTTGCAG	106.075	143.462	119.92	237.451
Er-Kf-Or-Sf_synthetic	AGTCCTAGC	437.324	445.754	431.683	397.528
Er-Kf-Or-Sf_synthetic	ATACGGGAG	95.2477	118.681	103.869	91.335
Er-Kf-Or-Sf_synthetic	ATTCTAGGA	280.487	299.056	300.264	293.907
Er-Kf-Or-Sf_synthetic	CGTACATCT	208.462	159.124	211.057	157.437
Er-Kf-Or-Sf_synthetic	CTCGTAATT	451.132	408.84	415.709	329.953
Er-Kf-Or-Sf_synthetic	GTGTCACCT	863.114	829.813	786.12	817.496
Er-Kf-Or-Sf_synthetic	TACCGAGCC	560.345	677.601	570.355	403.976
Er-Kf-Or-Sf_synthetic	TCGCCACTC	87.8727	84.4887	99.9337	58.5376
Er-Kf-Or-Sr_synthetic	ACATCTGAT	109.998	100.666	109.04	67.3716
Er-Kf-Or-Sr_synthetic	AGCGTTTGC	113.45	122.505	141.451	102.91
Er-Kf-Or-Sr_synthetic	CTAATAGGT	4.47209	6.98558	6.40502	6.80316
Er-Kf-Or-Sr_synthetic	CTATTGGAC	548.263	455.754	499.36	318.53
Er-Kf-Or-Sr_synthetic	GGAAGATTG	101.446	104.637	104.487	70.9763
Er-Kf-Or-Sr_synthetic	GGACCGCTT	362.004	357.294	376.816	338.635
Er-Kf-Or-Sr_synthetic	GGCTAAGGT	402.096	348.544	367.247	314.164
Er-Kf-Or-Sr_synthetic	TCTGATTGA	357.218	426.047	399.04	299.491
Er-Kf-Or_synthetic	AATACATCG	71.3966	61.326	59.1885	67.4731
Er-Kf-Or_synthetic	ATAATGCCT	211.051	219.274	222.478	241.614
Er-Kf-Or_synthetic	CACCTACAA	177.628	171.11	206.658	166.017
Er-Kf-Or_synthetic	CATCCAGCT	57.3526	73.3118	76.0885	73.9209
Er-Kf-Or_synthetic	CCGTATTTA	245.887	241.48	244.085	226.027
Er-Kf-Or_synthetic	CCTAATCTT	186.102	195.89	219.777	235.115
Er-Kf-Or_synthetic	GGATTAAGG	407.274	423.179	389.549	526.991
Er-Kf-Or_synthetic	TTACAGTCT	156.209	179.493	179.649	147.994
Er-Kf-Sf-Of_synthetic	ACTCCGGTG	286.763	316.925	354.977	223.438
Er-Kf-Sf-Of_synthetic	CACTTTGGG	801.76	803.048	781.181	501.758
Er-Kf-Sf-Of_synthetic	CCTAGACAG	198.89	171.11	190.993	216.077
Er-Kf-Sf-Of_synthetic	GCTCTTAGT	442.11	415.311	464.865	341.123
Er-Kf-Sf-Of_synthetic	TCCAGAGAC	459.684	506.785	479.682	371.635
Er-Kf-Sf-Of_synthetic	TTAAACCGG	391.975	475.902	373.189	347.114
Er-Kf-Sf-Of_synthetic	TTAGCTGGA	325.364	266.849	333.524	272.888
Er-Kf-Sf-Of_synthetic	TTGTTCACT	94.8554	126.108	137.052	95.5489
Er-Kf-Sf-Or_synthetic	ACAGGTATG	351.569	359.426	414.474	557.351
Er-Kf-Sf-Or_synthetic	AGAATCGGT	99.9552	97.2834	100.86	115.248
Er-Kf-Sf-Or_synthetic	ATACGGGTT	387.111	413.767	354.591	300.101
Er-Kf-Sf-Or_synthetic	ATATGAACG	104.27	101.181	71.5356	67.5747
Er-Kf-Sf-Or_synthetic	CCGCTGTCT	5.25667	8.52976	7.40821	9.39242
Er-Kf-Sf-Or_synthetic	GTATCTTTC	10.278	11.7652	9.72328	8.22472
Er-Kf-Sf-Or_synthetic	TAACGAGAC	162.878	146.771	156.344	106.515
Er-Kf-Sf-Or_synthetic	TGTACTCTT	170.018	212.656	215.07	159.874
Er-Kf-Sf_synthetic	AGCCCTGCT	204.539	181.184	207.507	337.67
Er-Kf-Sf_synthetic	ATTGGGCGG	18.9868	18.089	20.7584	117.583
Er-Kf-Sf_synthetic	CAATTCGTA	42.9949	64.0467	46.0698	81.5364
Er-Kf-Sf_synthetic	GGTCTTTAT	77.5163	80.518	74.6223	121.238
Er-Kf-Sf_synthetic	GTTGCTCTC	275.936	242.216	256.895	604.923
Er-Kf-Sf_synthetic	TAACATCCG	527.236	491.785	490.331	645.183
Er-Kf-Sf_synthetic	TGCCTGGCT	50.213	39.9281	53.015	79.9625
Er-Kf-Sf_synthetic	TTAGCATCA	NA	0.661792	3.31826	NA
Er-Kf-Sr-Of_synthetic	AGACGGCAG	255.929	268.982	265.229	196.682
Er-Kf-Sr-Of_synthetic	ATTCTGTGA	120.747	117.872	122.158	144.136
Er-Kf-Sr-Of_synthetic	CCTACACTG	61.354	79.7091	69.2205	50.3129
Er-Kf-Sr-Of_synthetic	CCTGCACAC	2.66756	2.42657	6.63653	6.09238
Er-Kf-Sr-Of_synthetic	CTGCAATCG	257.106	274.349	325.19	236.435
Er-Kf-Sr-Of_synthetic	GGACCCAAA	2.35373	6.39732	3.24109	4.51852
Er-Kf-Sr-Of_synthetic	TAGCGCAGC	150.325	126.696	107.265	120.325
Er-Kf-Sr-Of_synthetic	TAGGTCGAG	165.703	168.977	176.177	176.628
Er-Kf-Sr-Or_synthetic	ACACGCTGG	66.9245	65.9586	66.3653	48.5868
Er-Kf-Sr-Or_synthetic	ACCATTCTG	27.8525	32.5013	37.3497	27.0603
Er-Kf-Sr-Or_synthetic	CATCGCCGT	79.0854	122.505	121.464	77.0686
Er-Kf-Sr-Or_synthetic	CGGATGGGT	53.5867	57.4288	55.0986	43.7128
Er-Kf-Sr-Or_synthetic	GAATCTCTC	293.589	268.32	277.345	232.831
Er-Kf-Sr-Or_synthetic	GATCGGAGC	44.8778	35.0014	48.3849	38.9405
Er-Kf-Sr-Or_synthetic	TCCCAGACC	NA	NA	NA	NA
Er-Kf-Sr-Or_synthetic	TGAGGGCTG	167.037	176.551	166.145	157.183
Er-Kf-Sr_synthetic	AAACGACCC	417.238	399.722	378.668	431.391
Er-Kf-Sr_synthetic	CAAGTTCAG	319.951	283.909	297.023	381.231
Er-Kf-Sr_synthetic	CCTAATGTC	39.2289	44.1195	57.4137	62.9546
Er-Kf-Sr_synthetic	CGAGTCGAC	61.7463	43.3841	61.4264	131.189
Er-Kf-Sr_synthetic	GCAAAGGGC	217.563	181.772	165.296	360.821
Er-Kf-Sr_synthetic	GTCAGGACA	148.128	158.462	135.586	225.266
Er-Kf-Sr_synthetic	TGCGTCCAC	158.877	161.33	148.936	245.726
Er-Kf-Sr_synthetic	TTTCTTCGG	190.339	170.742	177.797	204.603
Er-Kf_synthetic	CCTGCCTTA	68.8075	52.4286	67.0598	158.503
Er-Kf_synthetic	CGACCACGT	7.21811	1.76478	4.7073	13.8602
Er-Kf_synthetic	CTCTCGACT	130.083	111.034	107.11	338.28
Er-Kf_synthetic	GACGACAGT	91.9525	92.5773	75.9342	251.311
Er-Kf_synthetic	GGACGCTAC	NA	1.10299	0.540182	NA
Er-Kf_synthetic	GGAGAATCT	33.8938	20.2949	38.5073	82.5518
Er-Kf_synthetic	GGATTGACC	165.232	153.609	132.653	442.764
Er-Kf_synthetic	TTCTCTTCG	2.27528	1.98538	0.926027	8.4278
Er-Kr-Of-Sf_synthetic	ACGGGCCAA	30.2062	24.0451	27.1635	38.6359
Er-Kr-Of-Sf_synthetic	ATGTGCACA	0.470747	0.808857	1.54338	4.87391
Er-Kr-Of-Sf_synthetic	CAGTAACGG	149.933	121.696	146.852	97.6812
Er-Kr-Of-Sf_synthetic	CCTGTACTT	77.6732	69.8558	84.7314	73.0071
Er-Kr-Of-Sf_synthetic	CTGATCGCG	27.0679	26.3981	25.4657	35.6404
Er-Kr-Of-Sf_synthetic	GAATCCATT	13.887	8.3827	12.4242	18.2771
Er-Kr-Of-Sf_synthetic	TTCTTTGCT	71.8673	66.0321	53.015	141.699
Er-Kr-Of-Sf_synthetic	TTGTGGCCA	1.09841	2.2795	2.2379	2.28464
Er-Kr-Of-Sr_synthetic	AAGTGGGCG	NA	NA	NA	NA
Er-Kr-Of-Sr_synthetic	ACCATCACC	202.343	240.966	228.42	201.099
Er-Kr-Of-Sr_synthetic	ACTCTACAT	113.842	135.079	127.097	144.44
Er-Kr-Of-Sr_synthetic	AGCTCTGCG	NA	NA	NA	NA
Er-Kr-Of-Sr_synthetic	ATTGTGACG	NA	NA	NA	NA
Er-Kr-Of-Sr_synthetic	GGTAAGCTC	0.941493	1.54418	1.77488	2.08156
Er-Kr-Of-Sr_synthetic	TAACTGCAC	257.812	286.703	269.551	220.9
Er-Kr-Of-Sr_synthetic	TGTCTAACC	6.66891	5.58846	5.63333	4.31544
Er-Kr-Of_synthetic	ACCAATACG	NA	NA	NA	NA
Er-Kr-Of_synthetic	GAGGTATTG	NA	NA	NA	NA
Er-Kr-Of_synthetic	GTGCTGAAG	49.9776	46.4725	41.9027	103.317
Er-Kr-Of_synthetic	TACCACGCG	30.9124	32.7955	32.9511	26.6542
Er-Kr-Of_synthetic	TCATATACG	NA	NA	NA	NA
Er-Kr-Of_synthetic	TCGTAGCTT	181.63	161.036	162.981	286.037
Er-Kr-Of_synthetic	TGGCGTTCA	NA	NA	NA	NA
Er-Kr-Of_synthetic	TGTCAAGTA	NA	NA	NA	NA
Er-Kr-Or-Sf_synthetic	AGATGGTCG	113.999	113.387	106.879	150.736
Er-Kr-Or-Sf_synthetic	CACACTTTA	221.643	195.449	231.275	157.945
Er-Kr-Or-Sf_synthetic	CCGTGTTGC	64.8846	53.6051	39.2018	39.6513
Er-Kr-Or-Sf_synthetic	CCTTCATGG	219.682	247.51	264.612	127.178
Er-Kr-Or-Sf_synthetic	CGTTTGGAT	0.627662	1.25005	1.62055	2.38618
Er-Kr-Or-Sf_synthetic	GAGGCTAGT	80.1054	79.6356	87.0465	77.8302
Er-Kr-Or-Sf_synthetic	GTACAGTAC	183.67	198.905	188.678	158.605
Er-Kr-Or-Sf_synthetic	GTCATTAGC	218.348	193.831	216.227	210.746
Er-Kr-Or-Sr_synthetic	ACCAGTAGT	NA	NA	2.39224	NA
Er-Kr-Or-Sr_synthetic	ATGGTGTTA	34.9137	33.972	18.2119	32.7973
Er-Kr-Or-Sr_synthetic	CCAAGAGCT	100.74	112.358	107.419	64.63
Er-Kr-Or-Sr_synthetic	GCCGTTGCT	211.444	205.155	190.376	173.125
Er-Kr-Or-Sr_synthetic	GCCTGTAAG	178.099	173.537	183.508	104.484
Er-Kr-Or-Sr_synthetic	TACGGTTGG	228.626	223.539	238.683	197.292
Er-Kr-Or-Sr_synthetic	TACTCCAGG	99.406	94.4892	92.6027	49.0945
Er-Kr-Or-Sr_synthetic	TGTCGCCCA	64.1	59.4877	73.7735	105.906
Er-Kr-Or_synthetic	ACCAGGCGA	NA	NA	NA	NA
Er-Kr-Or_synthetic	CAACTACCT	NA	NA	NA	NA
Er-Kr-Or_synthetic	CAGTCTTCA	54.1359	59.6348	65.1305	90.7765
Er-Kr-Or_synthetic	CGAGTCCGT	116.039	112.578	98.1588	93.7719
Er-Kr-Or_synthetic	GCATCAGAC	101.211	105.225	95.0721	107.632
Er-Kr-Or_synthetic	GCATCATCC	NA	NA	NA	NA
Er-Kr-Or_synthetic	GGTGCTCAT	NA	NA	NA	NA
Er-Kr-Or_synthetic	TTAGTACGA	7.68886	7.42677	7.48538	8.88472
Er-Kr-Sf-Of_synthetic	AGTAAGACG	97.2092	83.1652	105.644	85.2934
Er-Kr-Sf-Of_synthetic	CAGAGTATA	46.8393	39.634	44.5265	33.0512
Er-Kr-Sf-Of_synthetic	CGAGAGAAC	145.696	108.46	133.811	86.1057
Er-Kr-Sf-Of_synthetic	CGGTGATGA	111.802	111.696	110.737	83.3641
Er-Kr-Sf-Of_synthetic	CTGAGTGGC	14.907	22.4274	14.7393	19.5972
Er-Kr-Sf-Of_synthetic	GCTGCAAAC	183.12	175.669	177.488	229.429
Er-Kr-Sf-Of_synthetic	GGAGCTTAC	124.748	137.579	133.811	97.5289
Er-Kr-Sf-Of_synthetic	GTGGTCTGT	NA	NA	NA	NA
Er-Kr-Sf-Or_synthetic	AAACGACGA	334.152	350.897	313.614	164.85
Er-Kr-Sf-Or_synthetic	AGCTCGGTG	46.9177	40.0016	55.3301	55.1361
Er-Kr-Sf-Or_synthetic	CACCGTGGT	27.1464	33.6043	23.3822	21.2726
Er-Kr-Sf-Or_synthetic	CAGAGTCGA	42.6026	39.9281	27.7808	20.1049
Er-Kr-Sf-Or_synthetic	CCTACCACT	NA	NA	NA	NA
Er-Kr-Sf-Or_synthetic	CGAAGGAAG	60.9617	60.0025	50.237	33.9143
Er-Kr-Sf-Or_synthetic	GCATGGAGC	6.19816	9.11802	14.9708	6.65085
Er-Kr-Sf-Or_synthetic	TTGAATCCA	NA	NA	NA	NA
Er-Kr-Sf_synthetic	AACTTATGG	NA	NA	NA	NA
Er-Kr-Sf_synthetic	ACTGACAGG	64.5707	61.5466	52.3977	108.597
Er-Kr-Sf_synthetic	GATGCTGTA	NA	NA	0.926027	NA
Er-Kr-Sf_synthetic	GATTGAACA	160.446	133.608	141.065	305.279
Er-Kr-Sf_synthetic	GCGAAATTA	1.09841	1.17652	2.39224	2.23387
Er-Kr-Sf_synthetic	GCGGTGTTC	42.681	36.325	42.2114	75.3932
Er-Kr-Sf_synthetic	TACCCGTCT	NA	NA	0.463013	NA
Er-Kr-Sf_synthetic	TGCATGCGG	80.2623	72.8706	69.2205	91.0304
Er-Kr-Sr-Of_synthetic	AAAGATCTG	273.347	304.351	274.104	193.992
Er-Kr-Sr-Of_synthetic	ACCTATGTA	NA	NA	NA	NA
Er-Kr-Sr-Of_synthetic	ATTAACCAC	261.107	297.512	232.741	257.86
Er-Kr-Sr-Of_synthetic	CACAAGCTG	89.0496	103.019	82.1849	128.702
Er-Kr-Sr-Of_synthetic	CGTAACAGC	0.313831	0.808857	0.231507	1.11694
Er-Kr-Sr-Of_synthetic	GCGTTAGCC	2.0399	3.45602	1.62055	4.26467
Er-Kr-Sr-Of_synthetic	GTCACAGCT	92.7371	98.9011	75.857	94.2289
Er-Kr-Sr-Of_synthetic	TGTGACTAA	24.9496	9.48568	16.437	10.5601
Er-Kr-Sr-Or_synthetic	AACACTTCT	NA	NA	NA	NA
Er-Kr-Sr-Or_synthetic	ATCAATTCG	NA	NA	NA	NA
Er-Kr-Sr-Or_synthetic	CCACTCTGT	5.5705	1.10299	0.926027	5.83853
Er-Kr-Sr-Or_synthetic	CGATAAGTC	NA	NA	NA	NA
Er-Kr-Sr-Or_synthetic	CTACAGCGT	19.9283	25.8834	15.5881	13.0986
Er-Kr-Sr-Or_synthetic	GAGTTGGAA	NA	NA	NA	NA
Er-Kr-Sr-Or_synthetic	GATGAGCCG	NA	NA	NA	NA
Er-Kr-Sr-Or_synthetic	GATGAGTAC	40.3273	53.8993	49.4653	43.1036
Er-Kr-Sr_synthetic	AGAGGGCTA	1.25532	2.20597	0.385844	3.90928
Er-Kr-Sr_synthetic	ATCCCTTGG	2.35373	1.69125	0.308676	2.79234
Er-Kr-Sr_synthetic	CTCAAAGCA	NA	NA	NA	NA
Er-Kr-Sr_synthetic	GAAACAAGG	NA	NA	NA	NA
Er-Kr-Sr_synthetic	GGTTCTCGG	NA	NA	0.848858	NA
Er-Kr-Sr_synthetic	GTGAGTATT	15.77	13.53	13.4274	35.8943
Er-Kr-Sr_synthetic	TTGCCGTGG	112.744	82.724	101.091	104.434
Er-Kr-Sr_synthetic	TTGGTGTTC	NA	NA	NA	NA
Er-Kr_synthetic	AGAAAGGGT	50.3699	51.7668	41.3625	104.484
Er-Kr_synthetic	AGGTAGGCG	12.7886	15.2947	15.8968	92.5534
Er-Kr_synthetic	ATGTCGTAT	66.2968	68.3116	64.2817	157.945
Er-Kr_synthetic	GCACAAACT	NA	NA	NA	NA
Er-Kr_synthetic	GTCGAGAAG	20.0067	12.3534	13.9676	48.8914
Er-Kr_synthetic	TCACCCAAC	12.8671	18.0154	18.5977	43.3067
Er-Kr_synthetic	TTCCAGCCG	NA	NA	NA	NA
Er-Kr_synthetic	TTCCCTGGG	15.6131	16.7654	13.7361	24.4203
Er-Of-Kf-Sf_synthetic	AGCGTGCCT	243.925	230.965	248.561	274.462
Er-Of-Kf-Sf_synthetic	CACTGATAT	300.258	344.794	282.284	261.363
Er-Of-Kf-Sf_synthetic	CTTAGGGTG	237.021	262.878	249.41	228.211
Er-Of-Kf-Sf_synthetic	GATGGCAGT	394.172	437.003	364.623	473.53
Er-Of-Kf-Sf_synthetic	GGTTCAACG	509.74	478.475	525.983	479.978
Er-Of-Kf-Sf_synthetic	TATGACCCT	367.888	360.309	355.131	379.962
Er-Of-Kf-Sf_synthetic	TCCCGACAG	226.664	272.291	252.574	241.614
Er-Of-Kf-Sf_synthetic	TTTGCAATG	171.509	169.345	169.231	208.004
Er-Of-Kf-Sr_synthetic	ATGGCGTAC	5.17821	6.69145	4.55296	16.094
Er-Of-Kf-Sr_synthetic	CACTGAACT	321.912	316.189	325.267	199.069
Er-Of-Kf-Sr_synthetic	CACTGTTTG	547.086	593.333	623.139	422.507
Er-Of-Kf-Sr_synthetic	GAACAGTCT	332.426	342.661	331.595	363.461
Er-Of-Kf-Sr_synthetic	GACCTTAGT	298.532	344.573	306.052	214.198
Er-Of-Kf-Sr_synthetic	GCACAGGTA	179.276	203.685	192.691	152.462
Er-Of-Kf-Sr_synthetic	GGCTGTTTC	343.331	270.232	341.858	165.814
Er-Of-Kf-Sr_synthetic	TAGCTTCGT	127.258	127.138	109.58	78.744
Er-Of-Kf_synthetic	AGCGTCTTA	220.859	193.464	189.681	284.768
Er-Of-Kf_synthetic	ATATGGGTG	169.704	155.006	142.299	385.191
Er-Of-Kf_synthetic	ATTCGTCTG	78.7716	71.2529	67.5228	103.063
Er-Of-Kf_synthetic	CTTCTCAGT	25.8126	27.0599	29.6329	48.6375
Er-Of-Kf_synthetic	GAGGTCCGT	378.402	354.426	311.917	442.104
Er-Of-Kf_synthetic	GATAGAAGG	49.4284	45.9578	52.8607	76.764
Er-Of-Kf_synthetic	GTCCTACCC	250.673	237.583	234.053	345.184
Er-Of-Kf_synthetic	TTACATCTC	143.656	140.006	134.428	178.101
Er-Of-Kr-Sf_synthetic	CCAATGGAG	225.174	225.597	230.04	207.953
Er-Of-Kr-Sf_synthetic	CTGCCCATG	370.634	340.676	331.826	306.193
Er-Of-Kr-Sf_synthetic	CTGCTTCCG	644.295	660.762	626.38	455.659
Er-Of-Kr-Sf_synthetic	GACCCTTTG	745.506	805.915	686.186	615.331
Er-Of-Kr-Sf_synthetic	GACGGACTT	337.055	357.809	319.016	319.342
Er-Of-Kr-Sf_synthetic	GGTCAAGGT	332.582	317.734	316.161	391.994
Er-Of-Kr-Sf_synthetic	GTATGTACT	325.914	282.585	317.704	254.865
Er-Of-Kr-Sf_synthetic	TTAGCCCGG	591.964	570.906	616.888	381.789
Er-Of-Kr-Sr_synthetic	AAGTAATGC	438.5	468.549	459.078	338.28
Er-Of-Kr-Sr_synthetic	AATACCGTA	78.3008	74.1207	77.3232	53.2576
Er-Of-Kr-Sr_synthetic	AGTCCTTAA	738.209	745.104	751.548	567.912
Er-Of-Kr-Sr_synthetic	CCTTGCGTT	917.014	868.124	915.995	659.957
Er-Of-Kr-Sr_synthetic	TAAGCTGTC	431.439	415.164	425.818	285.936
Er-Of-Kr-Sr_synthetic	TCACGGCGT	376.362	407.664	356.983	260.652
Er-Of-Kr-Sr_synthetic	TGGCAACTA	75.9471	93.7538	98.6218	81.9425
Er-Of-Kr-Sr_synthetic	TTCATAACG	307.398	313.542	353.434	202.775
Er-Of-Kr_synthetic	AAATAGACC	76.104	62.429	69.7607	91.2334
Er-Of-Kr_synthetic	CAACAGAGC	196.694	215.818	243.622	289.591
Er-Of-Kr_synthetic	CATATCCCG	10.9056	13.0888	10.5721	10.9155
Er-Of-Kr_synthetic	CCATGGATG	NA	NA	0.617351	NA
Er-Of-Kr_synthetic	CTAACGAAT	320.578	329.719	341.087	397.63
Er-Of-Kr_synthetic	CTTGGAATG	27.3818	18.4566	26.1603	25.6388
Er-Of-Kr_synthetic	GTCGATTTA	80.2623	72.7971	57.1822	94.5842
Er-Of-Kr_synthetic	GTTCGAGTC	453.094	413.179	448.583	563.342
Er-Of-Sf-Kf_synthetic	AAGCTCATG	149.541	117.946	111.509	146.674
Er-Of-Sf-Kf_synthetic	CGCAACTCC	52.2529	36.6927	48.3077	67.9301
Er-Of-Sf-Kf_synthetic	CTGCTAACA	534.062	545.978	605.004	498.052
Er-Of-Sf-Kf_synthetic	GACGCCGAT	193.085	172.066	180.498	195.159
Er-Of-Sf-Kf_synthetic	GGTAGCCAT	334.465	313.248	353.048	398.086
Er-Of-Sf-Kf_synthetic	GTATGTCGG	448.151	433.032	389.163	365.441
Er-Of-Sf-Kf_synthetic	TCCGCCATA	260.48	256.113	239.069	243.695
Er-Of-Sf-Kf_synthetic	TGACTCATT	385.306	413.179	359.684	313.605
Er-Of-Sf-Kr_synthetic	AGAAATTCG	94.1493	98.3864	103.406	74.9871
Er-Of-Sf-Kr_synthetic	AGACGTCCC	1.64761	1.39712	0.617351	1.98002
Er-Of-Sf-Kr_synthetic	ATCCATGGG	48.5654	32.2072	60.6548	39.0928
Er-Of-Sf-Kr_synthetic	CCTACAGTA	NA	NA	0.926027	NA
Er-Of-Sf-Kr_synthetic	GATCCGGGA	22.9881	20.442	23.9995	16.4494
Er-Of-Sf-Kr_synthetic	GATCCGTAG	10.1995	6.54439	10.7265	13.3017
Er-Of-Sf-Kr_synthetic	GCGACTGAA	103.8	95.0039	86.9693	78.541
Er-Of-Sf-Kr_synthetic	GTTCCCTGT	2.35373	1.83831	2.00639	1.67541
Er-Of-Sf_synthetic	ACCTCCAAT	13.2594	18.9714	18.0575	88.6442
Er-Of-Sf_synthetic	ACGTTCGTT	169.861	168.977	144.306	636.349
Er-Of-Sf_synthetic	ATGGTCGGC	129.377	94.9304	102.094	416.871
Er-Of-Sf_synthetic	CAAGATAGG	55.7835	52.4286	38.6616	133.829
Er-Of-Sf_synthetic	CCTGGACGT	72.495	59.1936	45.8383	203.841
Er-Of-Sf_synthetic	GAGGAGATT	95.4046	85.8123	82.8022	360.72
Er-Of-Sf_synthetic	GTTTCCACT	292.883	287.365	275.802	722.76
Er-Of-Sf_synthetic	TTGGGAATC	93.1294	96.8422	92.9114	407.987
Er-Of-Sr-Kf_synthetic	AATGCCGTG	570.702	592.304	530.305	565.17
Er-Of-Sr-Kf_synthetic	ATATGGGCA	309.437	362.221	340.006	375.646
Er-Of-Sr-Kf_synthetic	ATGACCATT	181.394	208.244	159.277	177.085
Er-Of-Sr-Kf_synthetic	CGACTTGAC	230.744	201.699	261.988	176.933
Er-Of-Sr-Kf_synthetic	CGTGTGTGG	410.805	336.705	396.108	260.602
Er-Of-Sr-Kf_synthetic	CTCAGGTCA	249.888	239.127	236.909	220.189
Er-Of-Sr-Kf_synthetic	CTGGCGTAG	624.524	632.085	643.743	481.806
Er-Of-Sr-Kf_synthetic	CTTCATCTT	413.551	400.605	408.764	297.207
Er-Of-Sr-Kr_synthetic	GAGGTTAGC	16.4761	12.3534	19.5237	21.3741
Er-Of-Sr-Kr_synthetic	GCAAGGTGC	NA	NA	NA	NA
Er-Of-Sr-Kr_synthetic	GGCTAGGAA	378.951	313.248	317.473	277.203
Er-Of-Sr-Kr_synthetic	GGGACGAGT	190.495	225.45	223.018	233.084
Er-Of-Sr-Kr_synthetic	TACTAGTCG	25.3419	31.0307	26.9319	17.3125
Er-Of-Sr-Kr_synthetic	TACTCTCCT	NA	NA	NA	NA
Er-Of-Sr-Kr_synthetic	TATCTCATC	91.874	97.504	103.483	74.2763
Er-Of-Sr-Kr_synthetic	TCGATCTGA	NA	NA	2.00639	NA
Er-Of-Sr_synthetic	AATCGTCAG	22.0466	15.1477	14.3534	80.1148
Er-Of-Sr_synthetic	AGACCTCTA	56.725	53.6051	52.3977	209.223
Er-Of-Sr_synthetic	ATGTTACCA	104.349	94.9304	72.3844	372.295
Er-Of-Sr_synthetic	CGTGGCGAT	48.8007	43.8253	45.3753	154.493
Er-Of-Sr_synthetic	CTGTAGATA	114.627	95.3715	99.0077	358.892
Er-Of-Sr_synthetic	GTATCCTAA	NA	NA	NA	NA
Er-Of-Sr_synthetic	GTCTCCTCT	194.968	175.228	162.055	597.714
Er-Of-Sr_synthetic	TAGGATGTC	20.3206	9.26508	23.5365	88.5934
Er-Of_synthetic	AGTGACATT	225.409	176.551	179.263	749.058
Er-Of_synthetic	ATGCGTGCG	103.094	69.4146	68.6803	389.1
Er-Of_synthetic	GAGGTGCCT	51.8606	35.9574	41.2854	239.177
Er-Of_synthetic	GCGAACAAT	136.281	113.608	121.927	595.683
Er-Of_synthetic	GTCTAAAGC	138.086	108.681	128.178	607.36
Er-Of_synthetic	GTCTCGCTC	123.1	77.209	85.2716	454.949
Er-Of_synthetic	GTTTCTACC	25.9695	22.3539	20.2954	152.868
Er-Of_synthetic	TCATTAGGA	27.931	35.5162	33.5685	143.019
Er-Or-Kf-Sf_synthetic	CAAGGATAG	200.773	209.714	203.957	157.234
Er-Or-Kf-Sf_synthetic	CCAAGATCA	170.646	224.2	234.748	61.0761
Er-Or-Kf-Sf_synthetic	CTCCCTGAC	78.1439	82.3563	84.6543	74.784
Er-Or-Kf-Sf_synthetic	GAGATAACT	644.766	672.454	648.527	542.933
Er-Or-Kf-Sf_synthetic	GCGTACACC	317.754	298.762	318.399	351.023
Er-Or-Kf-Sf_synthetic	GGCTGCGTT	416.218	378.765	370.179	339.549
Er-Or-Kf-Sf_synthetic	GTAATTCCT	149.697	164.124	168.074	143.983
Er-Or-Kf-Sf_synthetic	TCGACCAAT	520.724	574.656	516.106	455.253
Er-Or-Kf-Sr_synthetic	AACTTCTCT	142.165	109.049	132.499	112.404
Er-Or-Kf-Sr_synthetic	ACACCGGTT	257.577	313.322	258.824	302.182
Er-Or-Kf-Sr_synthetic	CAAGCCCAC	671.834	595.466	719.291	389.862
Er-Or-Kf-Sr_synthetic	CGATTACGC	379.892	305.601	378.128	247.198
Er-Or-Kf-Sr_synthetic	CTTAAAGGA	499.148	531.713	483.463	309.29
Er-Or-Kf-Sr_synthetic	GCAGGTGAG	409.314	349.353	376.507	647.722
Er-Or-Kf-Sr_synthetic	GCCCTATAG	201.48	215.818	209.668	123.32
Er-Or-Kf-Sr_synthetic	TGTACGACT	257.577	272.07	248.715	172.668
Er-Or-Kf_synthetic	ACCCTGCTG	NA	1.69125	0.463013	NA
Er-Or-Kf_synthetic	CATCAGGCA	354.315	373.986	398.655	368.183
Er-Or-Kf_synthetic	CTTCCGTGA	27.6171	15.1477	20.4498	43.5605
Er-Or-Kf_synthetic	GGGTCAGAG	135.732	154.639	147.007	239.278
Er-Or-Kf_synthetic	GGTGGATTG	71.3966	56.5464	77.5547	130.428
Er-Or-Kf_synthetic	GTGATTCAC	327.09	270.305	287.84	501.048
Er-Or-Kf_synthetic	GTGTTAGTC	18.516	31.4719	18.8292	34.4727
Er-Or-Kf_synthetic	TAGGAATTG	255.145	237.51	212.677	324.978
Er-Or-Kr-Sf_synthetic	AGTATCTCC	665.008	697.823	605.236	618.326
Er-Or-Kr-Sf_synthetic	AGTTACGAT	272.955	262.658	268.702	139.922
Er-Or-Kr-Sf_synthetic	ATTCCTCTA	118.471	115.372	82.1849	104.992
Er-Or-Kr-Sf_synthetic	GAGATACCG	450.975	400.531	460.544	357.166
Er-Or-Kr-Sf_synthetic	GTGAACTGG	289.666	333.617	330.206	243.746
Er-Or-Kr-Sf_synthetic	TACACTTTC	485.026	580.686	494.961	405.956
Er-Or-Kr-Sf_synthetic	TACTGATCG	74.1426	86.9153	76.0885	62.1931
Er-Or-Kr-Sf_synthetic	TGTGATGAG	290.137	242.069	285.216	253.291
Er-Or-Kr-Sr_synthetic	AAGTGGATG	457.173	475.166	471.733	391.588
Er-Or-Kr-Sr_synthetic	ATCCAACTA	313.988	401.561	355.594	269.588
Er-Or-Kr-Sr_synthetic	ATGTTTCCC	104.663	121.328	104.718	65.3408
Er-Or-Kr-Sr_synthetic	CTAAATGTC	247.927	232.068	223.327	157.996
Er-Or-Kr-Sr_synthetic	GAGCTTCCA	669.715	625.981	629.39	506.48
Er-Or-Kr-Sr_synthetic	GTCACTGGC	272.092	252.804	232.664	281.976
Er-Or-Kr-Sr_synthetic	GTGTAGTGT	152.13	127.064	147.315	159.214
Er-Or-Kr-Sr_synthetic	TTATGTGCG	233.412	221.186	247.635	232.983
Er-Or-Kr_synthetic	AACCAGATG	358.787	387.589	346.951	471.703
Er-Or-Kr_synthetic	CGCACTTAT	25.028	24.2657	25.5429	35.0312
Er-Or-Kr_synthetic	CGGGTAGCT	63.3154	50.7374	72.5388	79.9118
Er-Or-Kr_synthetic	GCAGTGGCA	33.1092	34.5602	30.3274	47.216
Er-Or-Kr_synthetic	GCTCAGTAG	NA	NA	NA	NA
Er-Or-Kr_synthetic	GGATTGATT	61.1186	50.2962	56.642	87.578
Er-Or-Kr_synthetic	GTTGCGTCG	149.384	124.049	142.145	190.032
Er-Or-Kr_synthetic	TTCGCGACG	28.0879	26.9864	25.3114	89.8626
Er-Or-Sf-Kf_synthetic	ACTGCCCAT	257.655	272.364	244.162	209.324
Er-Or-Sf-Kf_synthetic	AGTTCACAG	359.101	369.868	367.864	289.236
Er-Or-Sf-Kf_synthetic	GCATCGTTG	263.775	263.173	263.532	270.096
Er-Or-Sf-Kf_synthetic	GCCAAGGTA	340.271	279.644	304.431	182.721
Er-Or-Sf-Kf_synthetic	TCCATCCTC	6.11971	9.41215	6.17351	7.4124
Er-Or-Sf-Kf_synthetic	TGATCACCC	81.8314	62.5761	75.7799	51.7345
Er-Or-Sf-Kf_synthetic	TTAGTTCTC	126.16	107.284	121.232	97.5289
Er-Or-Sf-Kf_synthetic	TTCAGCTTC	69.0428	79.2679	63.2013	40.9713
Er-Or-Sf-Kr_synthetic	AACTAGAAG	23.7727	23.0892	21.916	17.0079
Er-Or-Sf-Kr_synthetic	AAGACCCAG	NA	NA	1.2347	NA
Er-Or-Sf-Kr_synthetic	ACATGGGAG	6.66891	3.30896	4.55296	6.80316
Er-Or-Sf-Kr_synthetic	ACTCGCATC	0.392289	1.25005	3.24109	0.812318
Er-Or-Sf-Kr_synthetic	CATCTGTGG	24.0081	38.2369	27.3178	16.0433
Er-Or-Sf-Kr_synthetic	CCTAAACAC	NA	NA	NA	NA
Er-Or-Sf-Kr_synthetic	GTATGTGCA	24.6357	16.0301	16.5913	18.9879
Er-Or-Sf-Kr_synthetic	TTTCAAAGG	NA	NA	2.39224	NA
Er-Or-Sf_synthetic	AAGGAGGTA	107.566	84.7829	75.7799	274.31
Er-Or-Sf_synthetic	AAGGAGTTC	206.815	183.61	165.836	620.915
Er-Or-Sf_synthetic	AGTTGAAGG	50.0561	57.9435	39.279	213.386
Er-Or-Sf_synthetic	CAGTGGAAT	54.842	41.2517	53.5552	187.595
Er-Or-Sf_synthetic	CGCGAGCTT	72.3381	43.4577	36.9639	199.83
Er-Or-Sf_synthetic	GCGGGATTG	186.337	135.3	185.591	380.215
Er-Or-Sf_synthetic	GGTGCGTAG	72.5734	45.443	61.2721	238.821
Er-Or-Sf_synthetic	GTAGTATGA	7.0612	5.29433	6.48219	67.9808
Er-Or-Sr-Kf_synthetic	ACGGGATGC	199.91	216.185	196.781	172.668
Er-Or-Sr-Kf_synthetic	ACTAGCAAT	370.478	365.383	350.347	291.673
Er-Or-Sr-Kf_synthetic	AGCCGAAGC	392.681	390.751	355.208	358.587
Er-Or-Sr-Kf_synthetic	CTGCGGTTG	454.506	486.196	522.356	272.431
Er-Or-Sr-Kf_synthetic	GGGCTTGTT	466.118	383.839	487.785	403.011
Er-Or-Sr-Kf_synthetic	GTCCATCGT	368.045	359.426	388.237	272.431
Er-Or-Sr-Kf_synthetic	TAACCTAAC	259.695	234.863	247.095	168.861
Er-Or-Sr-Kf_synthetic	TGACTAAGT	344.822	372.148	344.945	250.803
Er-Or-Sr-Kr_synthetic	AGCAGCAGA	400.292	436.341	399.966	395.853
Er-Or-Sr-Kr_synthetic	ATGTCGTTA	55.6266	75.2972	65.4392	135.759
Er-Or-Sr-Kr_synthetic	CATTAATGC	128.828	122.431	120.769	77.5763
Er-Or-Sr-Kr_synthetic	GCTGGGTTG	NA	NA	1.08036	NA
Er-Or-Sr-Kr_synthetic	GGTTATCAT	122.08	69.8558	75.3168	70.367
Er-Or-Sr-Kr_synthetic	TAGCCCTAA	228.234	212.067	215.687	124.792
Er-Or-Sr-Kr_synthetic	TCATTTCTG	1.17687	3.23543	4.24429	1.11694
Er-Or-Sr-Kr_synthetic	TGTTACTCT	23.6158	29.1924	17.2858	21.171
Er-Or-Sr_synthetic	ACTTTGAGG	121.139	120.226	95.3808	388.44
Er-Or-Sr_synthetic	AGCCGTCCA	10.9056	13.8241	9.95479	42.5959
Er-Or-Sr_synthetic	ATAGCTGTA	41.6611	29.56	39.5105	120.02
Er-Or-Sr_synthetic	CTGAGATGA	42.5241	30.3689	38.4301	107.835
Er-Or-Sr_synthetic	GATGGTTGC	165.467	112.872	113.593	492.823
Er-Or-Sr_synthetic	TATCAACTC	142.087	142.947	121.85	362.192
Er-Or-Sr_synthetic	TATCGGAGT	60.4909	57.5759	59.42	232.475
Er-Or-Sr_synthetic	TCAACGAGC	37.4244	38.4575	42.6744	97.4274
Er-Or_synthetic	AAACCAAGT	30.8339	44.4136	29.247	144.694
Er-Or_synthetic	ACGGCGGTA	162.878	156.183	124.088	530.291
Er-Or_synthetic	CTTTCCAGA	123.885	128.314	130.724	555.016
Er-Or_synthetic	GATGCCCTG	8.08115	5.07374	4.32146	27.1619
Er-Or_synthetic	GATTCTGGA	109.449	103.828	98.5447	521.559
Er-Or_synthetic	GCGGGCTTA	197.949	141.182	145.155	661.836
Er-Or_synthetic	TACTGCCGA	48.8007	45.3695	35.3434	171.044
Er-Or_synthetic	TGCAAGGGC	55.8619	40.884	35.1118	197.546
Er-Sf-Kf-Of_synthetic	ACCAGTTGC	216.23	286.997	253.268	148.705
Er-Sf-Kf-Of_synthetic	ATAGCTTCG	456.86	458.328	429.908	344.524
Er-Sf-Kf-Of_synthetic	CGAGTTTCC	6.35508	4.77961	7.71689	11.5248
Er-Sf-Kf-Of_synthetic	GATTCCGAG	140.753	118.387	148.936	106.921
Er-Sf-Kf-Of_synthetic	GTGGCCAAA	629.702	553.184	617.042	517.497
Er-Sf-Kf-Of_synthetic	TGACACCTG	304.259	303.101	307.75	183.178
Er-Sf-Kf-Of_synthetic	TGGAGCTTA	302.141	301.777	330.669	214.807
Er-Sf-Kf-Of_synthetic	TTTCTGCTA	610.401	665.027	699.15	342.24
Er-Sf-Kf-Or_synthetic	AACGCCGTT	133.143	134.858	118.609	85.0903
Er-Sf-Kf-Or_synthetic	CTGTGCCAC	113.136	107.137	122.004	53.7145
Er-Sf-Kf-Or_synthetic	GTCTGCTCG	88.7357	97.504	94.7634	65.4423
Er-Sf-Kf-Or_synthetic	GTTGCTACT	56.8819	54.1934	38.5844	35.2343
Er-Sf-Kf-Or_synthetic	TAGAGACCA	11.7687	9.41215	17.363	5.58468
Er-Sf-Kf-Or_synthetic	TCACTTGTG	24.0865	33.8249	30.9447	18.8864
Er-Sf-Kf-Or_synthetic	TCAGCCTAA	4.70747	7.9415	12.1927	7.46317
Er-Sf-Kf-Or_synthetic	TCAGTATCT	NA	NA	NA	NA
Er-Sf-Kf_synthetic	AAGACTCTG	221.722	248.098	200.33	360.212
Er-Sf-Kf_synthetic	ATTATGCCA	117.059	116.475	112.975	221.052
Er-Sf-Kf_synthetic	CGCACTATA	240.944	201.92	231.584	337.264
Er-Sf-Kf_synthetic	CTATAGGCG	355.492	333.837	338.849	524.148
Er-Sf-Kf_synthetic	CTCTCATGC	37.3459	28.1629	39.279	63.2085
Er-Sf-Kf_synthetic	TCGTGTTCA	NA	NA	NA	NA
Er-Sf-Kf_synthetic	TGATTCATG	241.964	259.937	242.851	343.204
Er-Sf-Kf_synthetic	TGCCATCAC	90.6972	79.3415	82.0305	192.418
Er-Sf-Kr-Of_synthetic	ACCTACAAA	584.197	692.602	660.566	350.82
Er-Sf-Kr-Of_synthetic	ATAGCACTA	133.614	117.505	150.788	111.948
Er-Sf-Kr-Of_synthetic	ATGCTCTGC	67.4737	65.9586	52.4748	32.0358
Er-Sf-Kr-Of_synthetic	CATCGACTC	387.895	418.767	431.528	252.072
Er-Sf-Kr-Of_synthetic	CTCGATATA	315.4	282.291	351.118	155.254
Er-Sf-Kr-Of_synthetic	CTGTGGCTC	229.489	236.186	240.072	155.559
Er-Sf-Kr-Of_synthetic	CTTGCTTCA	4.55055	3.67662	0.848858	7.36163
Er-Sf-Kr-Of_synthetic	GTGGCTGAA	143.735	133.608	156.962	115.044
Er-Sf-Kr-Or_synthetic	CCATACTCC	NA	NA	NA	NA
Er-Sf-Kr-Or_synthetic	CCGACCAGA	3.21677	1.47065	1.08036	0.558468
Er-Sf-Kr-Or_synthetic	CTAACGGAC	35.4629	19.1184	26.5461	33.8127
Er-Sf-Kr-Or_synthetic	CTCTTCGAT	49.6638	52.8698	38.2758	41.5805
Er-Sf-Kr-Or_synthetic	GACAATCGA	52.8805	68.9734	57.9538	33.5081
Er-Sf-Kr-Or_synthetic	GCCATGCAT	78.9285	59.2671	81.4132	49.8052
Er-Sf-Kr-Or_synthetic	GTCTGGCTT	4.47209	4.92667	1.62055	2.43695
Er-Sf-Kr-Or_synthetic	GTGAGCGTA	65.8261	62.5761	48.7707	50.7191
Er-Sf-Kr_synthetic	ATCCCACGG	NA	NA	NA	NA
Er-Sf-Kr_synthetic	CAAGCCTTA	NA	NA	1.08036	NA
Er-Sf-Kr_synthetic	CAAGTTACA	82.616	76.9884	89.5159	110.424
Er-Sf-Kr_synthetic	CGCATGCTT	505.817	456.122	478.756	702.35
Er-Sf-Kr_synthetic	GACTATTCT	173.941	173.242	161.9	245.117
Er-Sf-Kr_synthetic	GAGGTACAT	7.6104	14.2653	7.48538	18.4802
Er-Sf-Kr_synthetic	TCACTTACG	48.8007	55.0758	37.8128	59.9084
Er-Sf-Kr_synthetic	TTGGTGTCA	14.6716	25.4422	18.2119	29.5481
Er-Sf-Of-Kf_synthetic	AAGACCACG	173.862	187.875	142.917	93.315
Er-Sf-Of-Kf_synthetic	ATGAAGACA	409.393	456.857	433.844	271.365
Er-Sf-Of-Kf_synthetic	ATTTAGAGG	463.685	524.874	452.673	211.507
Er-Sf-Of-Kf_synthetic	CTCGCCATC	267.776	227.509	287.608	97.3766
Er-Sf-Of-Kf_synthetic	GTTAAAGAG	528.57	491.785	479.913	314.621
Er-Sf-Of-Kf_synthetic	GTTGTGCGA	753.351	728.192	730.095	511.811
Er-Sf-Of-Kf_synthetic	TTGGTAGAG	364.358	386.781	417.407	228.363
Er-Sf-Of-Kf_synthetic	TTTCAACAC	544.732	560.023	574.754	317.21
Er-Sf-Of-Kr_synthetic	ATATCCTTC	3.21677	2.7207	2.62374	1.21848
Er-Sf-Of-Kr_synthetic	CATACTGAT	114.627	100.004	96.384	60.0607
Er-Sf-Of-Kr_synthetic	CTTGGACCT	6.82583	7.42677	4.93881	3.85851
Er-Sf-Of-Kr_synthetic	GCACAGGAG	309.987	350.382	352.585	187.848
Er-Sf-Of-Kr_synthetic	GCGATGACC	65.5907	57.7965	61.8123	28.888
Er-Sf-Of-Kr_synthetic	GTCACTCAG	4.15826	2.9413	3.4726	1.16771
Er-Sf-Of-Kr_synthetic	GTTTCGGGT	59.2356	49.2667	47.6132	34.5235
Er-Sf-Of-Kr_synthetic	TCGTGCTGA	293.118	324.572	327.659	150.38
Er-Sf-Of_synthetic	AACCTGGCG	92.4232	81.621	73.6963	271.314
Er-Sf-Of_synthetic	ACCTGTGTT	163.035	145.006	163.212	550.041
Er-Sf-Of_synthetic	ACTCTGTTG	6.11971	5.29433	3.24109	17.1602
Er-Sf-Of_synthetic	ATAACGTAG	14.3578	17.5007	17.0543	66.9147
Er-Sf-Of_synthetic	CAAGTCATG	99.7983	91.9155	92.2168	292.181
Er-Sf-Of_synthetic	GCTATTCTT	136.36	116.328	159.045	501.048
Er-Sf-Of_synthetic	GTCGTATGC	79.4777	65.4439	89.4387	321.069
Er-Sf-Of_synthetic	TGTCAGGTT	44.7994	48.5314	53.4009	167.591
Er-Sf-Or-Kf_synthetic	AGAGAGATT	167.037	235.23	177.643	151.599
Er-Sf-Or-Kf_synthetic	AGGTGCTGA	470.825	515.021	471.348	450.075
Er-Sf-Or-Kf_synthetic	CCGCTTCGT	385.541	437.738	453.522	309.95
Er-Sf-Or-Kf_synthetic	GACGAATAT	229.018	238.98	230.967	160.077
Er-Sf-Or-Kf_synthetic	GCACCAGTC	367.732	384.575	361.459	271.365
Er-Sf-Or-Kf_synthetic	GTCGGGCTA	29.814	29.9277	24.5397	25.8419
Er-Sf-Or-Kf_synthetic	TATGCCTAT	106.467	94.3421	86.1977	54.0699
Er-Sf-Or-Kf_synthetic	TTGCGTCCC	280.957	256.26	246.169	218.412
Er-Sf-Or-Kr_synthetic	AGATCGCAG	19.0652	21.6185	17.2858	80.6225
Er-Sf-Or-Kr_synthetic	AGGTCAGGG	94.0709	98.4599	96.2296	63.4623
Er-Sf-Or-Kr_synthetic	CAATGCGTG	NA	NA	NA	NA
Er-Sf-Or-Kr_synthetic	CATCCAACC	1.64761	2.5001	0.926027	1.67541
Er-Sf-Or-Kr_synthetic	CTAAACACT	34.5214	36.1044	41.594	20.8156
Er-Sf-Or-Kr_synthetic	GTCGCTGGT	73.2011	79.1209	83.3424	54.1714
Er-Sf-Or-Kr_synthetic	TCCGGGAAC	2.58911	0.588259	1.31187	1.47233
Er-Sf-Or-Kr_synthetic	TCTCCGGTA	54.7635	75.5913	45.221	26.4003
Er-Sf-Or_synthetic	AAGCTAGTG	9.88568	7.50031	5.01598	28.9896
Er-Sf-Or_synthetic	ACACCAAAT	76.6532	51.9139	59.1885	190.895
Er-Sf-Or_synthetic	CTGTCGCAC	NA	NA	NA	NA
Er-Sf-Or_synthetic	CTTCTAAAC	62.217	60.3701	75.1625	165.662
Er-Sf-Or_synthetic	GATATGACA	89.2065	58.0171	63.7415	300.862
Er-Sf-Or_synthetic	GCCTAACCG	8.00269	6.83851	11.9612	31.8835
Er-Sf-Or_synthetic	GCGGGTCAT	24.5573	28.3835	30.3274	86.7657
Er-Sf-Or_synthetic	TCTAGCACC	106.153	84.4152	92.1397	275.376
Er-Sf_synthetic	GAGAGCGGA	51.3114	36.9133	32.4109	199.779
Er-Sf_synthetic	GCGAGTTAC	42.9949	33.8249	35.5749	180.03
Er-Sf_synthetic	GGAAGACAT	71.0827	53.1639	61.8123	282.585
Er-Sf_synthetic	GGTAGTCCA	42.0534	21.545	39.8963	150.99
Er-Sf_synthetic	GTCCTTACA	122.786	101.622	115.676	535.368
Er-Sf_synthetic	TAGGATGGG	75.241	57.2082	45.3753	243.34
Er-Sf_synthetic	TGCTAACTC	63.08	53.2375	46.3013	243.441
Er-Sf_synthetic	TTCGTGAGG	62.4524	48.6049	40.1278	219.732
Er-Sr-Kf-Of_synthetic	AACGGACAG	710.121	772.311	720.603	386.714
Er-Sr-Kf-Of_synthetic	AGGCGGAAA	494.676	522.007	513.713	325.892
Er-Sr-Kf-Of_synthetic	ATGTATGCG	322.54	333.47	290.927	240.7
Er-Sr-Kf-Of_synthetic	GATACTGAC	102.23	75.8119	72.8474	69.1993
Er-Sr-Kf-Of_synthetic	GCATGGCTT	5.09975	2.13244	5.86484	8.02164
Er-Sr-Kf-Of_synthetic	TAACGCAGA	640.215	682.087	624.759	358.08
Er-Sr-Kf-Of_synthetic	TAACGCTAT	39.7781	46.9137	57.6452	63.2085
Er-Sr-Kf-Of_synthetic	TAGACCGTT	392.603	433.621	415.4	183.533
Er-Sr-Kf-Or_synthetic	AGAGTCTTC	NA	0.441195	2.85525	NA
Er-Sr-Kf-Or_synthetic	ATCAGGAAC	79.6346	78.4591	80.2557	48.0283
Er-Sr-Kf-Or_synthetic	ATCGGTACT	172.215	163.757	199.019	114.841
Er-Sr-Kf-Or_synthetic	CACAACTCG	148.834	157.654	171.161	96.615
Er-Sr-Kf-Or_synthetic	CTGCCTGAT	53.0374	55.0022	66.9054	25.2326
Er-Sr-Kf-Or_synthetic	GAACAACGT	374.4	444.356	401.355	246.995
Er-Sr-Kf-Or_synthetic	GACCTTGGA	81.5176	97.3569	85.1173	58.0299
Er-Sr-Kf-Or_synthetic	GATCCAACG	226.664	261.481	262.683	171.348
Er-Sr-Kf_synthetic	AAGGACGGT	166.409	159.492	135.354	234.608
Er-Sr-Kf_synthetic	AATCGCAGC	179.354	180.154	204.498	285.885
Er-Sr-Kf_synthetic	CATCTGCTC	81.0469	84.1946	88.6671	122.051
Er-Sr-Kf_synthetic	CCGGGATCT	8.23807	6.69145	14.6621	13.9617
Er-Sr-Kf_synthetic	CCTCGCGAT	57.4311	72.0618	71.0726	84.7857
Er-Sr-Kf_synthetic	GGAAGACCC	561.993	527.301	489.637	674.528
Er-Sr-Kf_synthetic	TTACTGTTG	124.591	126.99	101.631	181.807
Er-Sr-Kf_synthetic	TTGGCTACA	37.0321	20.6626	36.6552	53.0037
Er-Sr-Kr-Of_synthetic	ACTGTACAG	245.808	288.468	276.882	194.093
Er-Sr-Kr-Of_synthetic	AGACAATAG	169.233	222.215	195.237	91.5381
Er-Sr-Kr-Of_synthetic	AGGCTGTGT	488.557	493.917	498.897	317.413
Er-Sr-Kr-Of_synthetic	ATACATTCC	7.53195	2.86776	8.02557	7.10778
Er-Sr-Kr-Of_synthetic	CTGAACAAA	212.071	200.964	222.787	111.288
Er-Sr-Kr-Of_synthetic	GCAGATCGA	528.413	543.405	539.333	319.901
Er-Sr-Kr-Of_synthetic	GTCGTTTAG	207.05	231.774	231.43	172.973
Er-Sr-Kr-Of_synthetic	TTACTCGTC	46.9962	79.1944	59.5744	40.2097
Er-Sr-Kr-Or_synthetic	ACGCCAATC	84.8128	80.0768	100.242	47.9775
Er-Sr-Kr-Or_synthetic	CCGAAAGAA	1.41224	1.47065	1.54338	1.72618
Er-Sr-Kr-Or_synthetic	CCGATTGGG	56.3327	38.0898	45.684	45.896
Er-Sr-Kr-Or_synthetic	CGACCAACG	113.999	96.4745	120.769	59.7561
Er-Sr-Kr-Or_synthetic	CGACCTTTA	159.975	148.021	174.247	84.7349
Er-Sr-Kr-Or_synthetic	GAGTAATGT	428.144	466.563	378.128	290.607
Er-Sr-Kr-Or_synthetic	TCATGAACT	31.9323	32.3543	25.7744	33.2543
Er-Sr-Kr-Or_synthetic	TGTAGAGTC	117.922	128.167	134.12	72.9563
Er-Sr-Kr_synthetic	AAGGAGACA	493.892	521.271	475.746	679.301
Er-Sr-Kr_synthetic	AGACGGACG	89.9126	109.049	87.278	130.682
Er-Sr-Kr_synthetic	AGCTACCGC	202.186	209.2	192.536	272.583
Er-Sr-Kr_synthetic	CAAGGAAGT	288.175	284.497	284.676	387.882
Er-Sr-Kr_synthetic	CGAGGTAGT	281.663	239.127	269.474	278.828
Er-Sr-Kr_synthetic	GCCCAACAA	60.8048	56.2523	59.5744	87.578
Er-Sr-Kr_synthetic	GCTCGTTAA	97.2876	71.547	75.0853	117.025
Er-Sr-Kr_synthetic	TACCTCGCC	38.8366	24.0451	38.816	45.2867
Er-Sr-Of-Kf_synthetic	ATACTGCCC	338.231	365.677	328.739	196.733
Er-Sr-Of-Kf_synthetic	CGGATTGAT	1123.52	1029.09	1265.88	466.727
Er-Sr-Of-Kf_synthetic	CTTCCTATG	95.7969	91.0331	119.998	57.8776
Er-Sr-Of-Kf_synthetic	GAATACTTC	512.408	542.375	488.402	418.699
Er-Sr-Of-Kf_synthetic	GACAGGTGT	793.208	843.196	703.317	496.529
Er-Sr-Of-Kf_synthetic	GAGTAGAAC	176.295	198.023	176.794	112.861
Er-Sr-Of-Kf_synthetic	GTTGCCAAC	396.055	372.221	366.475	249.178
Er-Sr-Of-Kf_synthetic	TGAGACCAA	256.949	237.583	258.824	201.049
Er-Sr-Of-Kr_synthetic	AGAGCAACT	NA	NA	5.55616	NA
Er-Sr-Of-Kr_synthetic	CGTGTCCAA	18.7514	21.3244	23.6909	12.5402
Er-Sr-Of-Kr_synthetic	GAAGTCAGA	199.989	213.465	207.276	103.977
Er-Sr-Of-Kr_synthetic	GACCGAATG	214.425	234.863	225.024	93.4673
Er-Sr-Of-Kr_synthetic	GAGTTGCTC	246.436	232.142	255.429	129.26
Er-Sr-Of-Kr_synthetic	GCGACAAGG	421.318	406.193	380.597	167.642
Er-Sr-Of-Kr_synthetic	GGCTGATAA	468.236	429.871	419.49	213.132
Er-Sr-Of-Kr_synthetic	TACAGCTCG	32.6384	22.5745	24.1539	17.8202
Er-Sr-Of_synthetic	AATCTTTCG	58.5295	52.1345	58.4169	146.116
Er-Sr-Of_synthetic	AGGACCCAC	80.1054	72.3559	66.1337	250.854
Er-Sr-Of_synthetic	CAGCCAATT	55.3912	32.6484	60.5776	160.382
Er-Sr-Of_synthetic	GCACGACTG	64.7277	44.7077	43.9863	183.431
Er-Sr-Of_synthetic	GCCTTCAGA	42.5241	33.4573	24.7712	105.957
Er-Sr-Of_synthetic	GGATCTATT	109.919	91.6949	104.332	408.951
Er-Sr-Of_synthetic	GGGCTTCAG	65.5122	41.7664	48.8479	201.81
Er-Sr-Of_synthetic	TTGTCCGCC	8.39498	10.8093	8.72009	38.1282
Er-Sr-Or-Kf_synthetic	CGGACTTGG	323.56	300.453	359.221	198.764
Er-Sr-Or-Kf_synthetic	CTGGATGCG	374.087	308.983	364.469	327.11
Er-Sr-Or-Kf_synthetic	GCGGATCCT	296.335	346.411	291.93	223.286
Er-Sr-Or-Kf_synthetic	GCTACCATA	83.3221	91.0331	110.969	132.611
Er-Sr-Or-Kf_synthetic	GTAACGCAT	314.459	325.234	324.727	362.903
Er-Sr-Or-Kf_synthetic	TGACTGTGC	3.21677	2.7207	0.540182	4.36621
Er-Sr-Or-Kf_synthetic	TGGTTTGCA	229.097	188.905	201.488	167.033
Er-Sr-Or-Kf_synthetic	TTGCCTATA	275.622	294.791	275.493	234.151
Er-Sr-Or-Kr_synthetic	AGAAGGAGT	NA	NA	0.848858	NA
Er-Sr-Or-Kr_synthetic	ATCAGTTGG	126.631	169.86	139.367	102.098
Er-Sr-Or-Kr_synthetic	ATCCGCCTC	14.5931	15.3683	13.0415	12.4386
Er-Sr-Or-Kr_synthetic	CAACCACAG	NA	2.35304	1.08036	NA
Er-Sr-Or-Kr_synthetic	CTCGGATAC	0.784578	1.76478	0.771689	1.37079
Er-Sr-Or-Kr_synthetic	GCGTTGCAA	160.368	122.064	140.833	133.017
Er-Sr-Or-Kr_synthetic	TAGAAGCAT	2.66756	5.2208	5.17032	5.68622
Er-Sr-Or-Kr_synthetic	TCCAGCCAC	31.2262	12.7211	7.9484	17.3633
Er-Sr-Or_synthetic	ACTGTGAAC	144.755	143.241	142.222	426.111
Er-Sr-Or_synthetic	AGGATTGGG	120.354	130.667	110.815	418.547
Er-Sr-Or_synthetic	AGTAAGTCT	91.7956	83.3858	112.049	302.995
Er-Sr-Or_synthetic	CGCTGTTAG	99.4844	80.4445	87.2009	243.238
Er-Sr-Or_synthetic	GATCTAACT	36.9536	27.4276	23.3822	102.809
Er-Sr-Or_synthetic	GCCACGTAC	262.206	205.229	206.118	704.381
Er-Sr-Or_synthetic	TGAGCAATT	44.4856	36.325	45.8383	134.185
Er-Sr-Or_synthetic	TGTGTCAGA	NA	NA	NA	NA
Er-Sr_synthetic	ATAGCTAGG	73.5149	54.8552	62.5068	273.853
Er-Sr_synthetic	ATGTGTTAG	54.0574	56.62	47.4589	230.444
Er-Sr_synthetic	ATTAACACG	92.6586	75.1501	61.3493	310.762
Er-Sr_synthetic	CCGTGATAT	134.084	119.564	115.29	417.379
Er-Sr_synthetic	GAAGCTGAC	50.9191	22.795	25.8516	187.493
Er-Sr_synthetic	TATCCGGCC	NA	NA	NA	NA
Er-Sr_synthetic	TGACGTATT	30.0493	20.2214	23.2278	112.354
Er-Sr_synthetic	TTGCCGTCT	59.7848	49.5608	52.6292	191.149
Kf-Ef-Of-Sf_synthetic	AACTCAGTT	435.833	414.649	418.796	559.788
Kf-Ef-Of-Sf_synthetic	AAGTGAGTG	199.753	220.156	196.395	266.186
Kf-Ef-Of-Sf_synthetic	CAGGTCGTC	227.292	239.495	211.674	287.662
Kf-Ef-Of-Sf_synthetic	CGGTCTCGA	55.3127	60.7378	48.1534	50.4652
Kf-Ef-Of-Sf_synthetic	CTGCAAGAT	201.872	211.847	174.325	294.668
Kf-Ef-Of-Sf_synthetic	TAACCGCCC	94.6201	113.093	90.9821	155.407
Kf-Ef-Of-Sf_synthetic	TCTGTCCTT	112.744	141.329	122.236	210.543
Kf-Ef-Of-Sf_synthetic	TTCATCTGA	218.819	186.772	222.864	244.711
Kf-Ef-Of-Sr_synthetic	ACTGTGGAA	98.543	94.8568	85.3488	127.686
Kf-Ef-Of-Sr_synthetic	AGACAGTAT	158.799	144.785	137.978	138.094
Kf-Ef-Of-Sr_synthetic	AGGATGACT	309.751	311.41	290.85	380.368
Kf-Ef-Of-Sr_synthetic	CAGGAGTAT	106.389	132.652	123.702	138.856
Kf-Ef-Of-Sr_synthetic	GGATCATTA	483.771	492.667	471.348	574.461
Kf-Ef-Of-Sr_synthetic	GTTGATTGC	131.731	115.519	155.881	286.647
Kf-Ef-Of-Sr_synthetic	TAGACCGCC	142.715	158.756	147.701	155.61
Kf-Ef-Of-Sr_synthetic	TGACTGCGA	46.9177	42.3547	29.4013	50.6175
Kf-Ef-Of_synthetic	AACTGTGTC	139.184	139.565	127.483	275.02
Kf-Ef-Of_synthetic	ACTGTAACG	77.4378	82.1357	59.2657	149.416
Kf-Ef-Of_synthetic	ATGAACCGT	388.366	437.224	396.494	643.914
Kf-Ef-Of_synthetic	GACTCACTT	244.867	249.716	209.668	412.353
Kf-Ef-Of_synthetic	GAGTCCGAA	191.202	196.405	166.222	437.636
Kf-Ef-Of_synthetic	GAGTCGAGG	97.4445	113.24	113.438	231.155
Kf-Ef-Of_synthetic	GTAGAGACG	298.14	276.114	271.403	515.365
Kf-Ef-Of_synthetic	GTCGAGCAT	53.6651	46.3254	45.8383	122.863
Kf-Ef-Or-Sf_synthetic	AACTCCATT	78.5362	62.5761	61.1178	81.1302
Kf-Ef-Or-Sf_synthetic	ACTACTTGA	222.506	211.92	198.015	222.169
Kf-Ef-Or-Sf_synthetic	CAGCTGAGG	336.505	319.204	346.102	304.416
Kf-Ef-Or-Sf_synthetic	GCGGTTGTT	394.564	380.604	362.694	408.748
Kf-Ef-Or-Sf_synthetic	GGATCTTTG	455.29	404.355	403.362	606.547
Kf-Ef-Or-Sf_synthetic	GTCAGTCAA	167.193	184.566	173.321	211.609
Kf-Ef-Or-Sf_synthetic	TAGATCTCC	523.549	531.86	483.926	416.008
Kf-Ef-Or-Sf_synthetic	TGTTTGCCG	315.243	315.601	330.746	333.761
Kf-Ef-Or-Sr_synthetic	AAGGTGGAT	NA	NA	0.926027	NA
Kf-Ef-Or-Sr_synthetic	ATCGAGTGC	146.951	154.933	134.197	184.853
Kf-Ef-Or-Sr_synthetic	ATGGGATAG	218.662	258.025	223.713	220.443
Kf-Ef-Or-Sr_synthetic	CACGAGCTA	152.13	152.433	178.492	149.01
Kf-Ef-Or-Sr_synthetic	GGCCGTAAA	263.697	255.01	248.33	291.927
Kf-Ef-Or-Sr_synthetic	GTAAAGATC	234.118	187.214	224.793	199.678
Kf-Ef-Or-Sr_synthetic	GTACGGCTA	171.823	137.726	172.55	167.388
Kf-Ef-Or-Sr_synthetic	TTGTACCGA	138.635	142.653	120.769	95.4473
Kf-Ef-Or_synthetic	AGAGGCGGA	532.807	515.977	523.977	615.026
Kf-Ef-Or_synthetic	ATACACTGG	242.591	281.041	247.326	269.639
Kf-Ef-Or_synthetic	ATCCGTCAA	297.983	367.074	369.562	297.461
Kf-Ef-Or_synthetic	CGTATGCTA	234.981	180.596	238.143	272.888
Kf-Ef-Or_synthetic	GGCAGTATA	163.663	126.329	163.675	192.722
Kf-Ef-Or_synthetic	GGGCTTAAA	393.544	358.544	431.065	540.09
Kf-Ef-Or_synthetic	GTTCGGTCA	76.6532	63.7526	56.1018	96.8689
Kf-Ef-Or_synthetic	TGTCCTTGC	142.244	131.917	122.621	174.699
Kf-Ef-Sf-Of_synthetic	AAGTTGACT	79.0854	78.4591	72.1529	74.1748
Kf-Ef-Sf-Of_synthetic	ACGACAATA	410.02	415.532	377.896	344.575
Kf-Ef-Sf-Of_synthetic	ACTTGGGAC	15.6131	10.3681	9.49177	21.8818
Kf-Ef-Sf-Of_synthetic	CATCCAGAA	37.6597	30.9571	32.9511	95.2443
Kf-Ef-Sf-Of_synthetic	CTATAAGGG	113.371	105.151	156.036	111.034
Kf-Ef-Sf-Of_synthetic	GGAACCTGT	131.652	132.064	108.808	120.477
Kf-Ef-Sf-Of_synthetic	TCCGATCGG	280.487	277.291	303.66	228.109
Kf-Ef-Sf-Of_synthetic	TGCCGTTGT	168.527	195.817	156.653	158.808
Kf-Ef-Sf-Or_synthetic	AGAGCGGGA	10.3564	19.192	9.95479	12.3371
Kf-Ef-Sf-Or_synthetic	CTGGTTACT	508.485	468.622	552.298	398.188
Kf-Ef-Sf-Or_synthetic	GGCTTGCGT	122.708	113.019	125.708	122.508
Kf-Ef-Sf-Or_synthetic	GTGGAGGCT	143.499	144.124	137.746	152.766
Kf-Ef-Sf-Or_synthetic	GTGTAATCA	80.1054	94.7833	80.1013	71.2301
Kf-Ef-Sf-Or_synthetic	TCAATCCGC	110.782	135.447	123.239	97.275
Kf-Ef-Sf-Or_synthetic	TCATGTAGC	68.1013	64.7085	57.1822	42.9513
Kf-Ef-Sf-Or_synthetic	TCGTTGTGT	249.574	223.833	219.931	213.843
Kf-Ef-Sf_synthetic	CAATAGGGT	35.8552	30.0012	38.6616	123.015
Kf-Ef-Sf_synthetic	CAATGGTGT	117.373	92.3567	96.6155	191.91
Kf-Ef-Sf_synthetic	GAAACCTCT	17.8884	14.0447	24.231	37.1635
Kf-Ef-Sf_synthetic	GCTAATCCC	72.8088	82.2092	74.468	164.799
Kf-Ef-Sf_synthetic	GGTCGTAAG	201.48	197.361	232.896	393.314
Kf-Ef-Sf_synthetic	TGCGATCAG	68.2583	53.311	54.6356	101.641
Kf-Ef-Sf_synthetic	TTGCCTTCA	496.638	494.358	529.687	569.739
Kf-Ef-Sf_synthetic	TTTCACGGT	107.801	112.505	99.7794	152.411
Kf-Ef-Sr-Of_synthetic	AGTTAAGGA	51.4683	68.6057	52.2433	73.9209
Kf-Ef-Sr-Of_synthetic	CACGTCTCT	77.9086	78.8268	72.2301	59.6546
Kf-Ef-Sr-Of_synthetic	GAGTACGTA	73.9857	91.6949	87.278	68.7424
Kf-Ef-Sr-Of_synthetic	GCTGTGGAT	118.157	111.696	133.194	153.63
Kf-Ef-Sr-Of_synthetic	GGGCAGTGT	136.046	131.917	136.82	146.319
Kf-Ef-Sr-Of_synthetic	GTGACAGCC	187.828	193.464	188.601	239.735
Kf-Ef-Sr-Of_synthetic	TGGAGGTCC	100.504	99.5629	95.6894	78.9471
Kf-Ef-Sr-Of_synthetic	TGTATGCAA	253.026	228.171	212.292	257.809
Kf-Ef-Sr-Or_synthetic	ACCTACATT	217.877	248.466	237.063	221.458
Kf-Ef-Sr-Or_synthetic	CATCGACCT	17.2607	24.9275	23.4593	22.8972
Kf-Ef-Sr-Or_synthetic	CCTCCGGTT	NA	NA	NA	NA
Kf-Ef-Sr-Or_synthetic	CGAGGCTAC	106.467	81.0327	86.5063	72.0424
Kf-Ef-Sr-Or_synthetic	CTAGATGAA	246.122	220.818	295.48	266.034
Kf-Ef-Sr-Or_synthetic	GAATTGTGG	291.157	271.261	271.326	269.233
Kf-Ef-Sr-Or_synthetic	TAGGACAAG	376.597	394.869	412.776	384.176
Kf-Ef-Sr-Or_synthetic	TGGAGCGAT	0.392289	0.514727	2.2379	3.7062
Kf-Ef-Sr_synthetic	AGCCTGGGA	233.804	229.495	218.002	383.109
Kf-Ef-Sr_synthetic	CATACGGCT	8.47344	12.427	8.95159	25.3849
Kf-Ef-Sr_synthetic	GACTACCAT	243.454	257.29	231.97	407.225
Kf-Ef-Sr_synthetic	GAGGGTTGT	116.039	111.034	113.593	217.701
Kf-Ef-Sr_synthetic	GGTTCTGTT	29.7355	21.0303	26.8548	43.3575
Kf-Ef-Sr_synthetic	GTATAATCG	82.4591	49.2667	64.2817	105.906
Kf-Ef-Sr_synthetic	GTGCCCTAA	3.37368	2.7207	0.231507	9.24011
Kf-Ef-Sr_synthetic	GTTTGTGTC	211.601	177.801	173.167	353.511
Kf-Ef_synthetic	AGTGAGGTC	37.9736	37.7221	51.3173	103.672
Kf-Ef_synthetic	CATAATCTG	8.94419	9.85334	11.5753	25.8419
Kf-Ef_synthetic	CCTCTCCTA	23.3804	21.7656	13.2731	55.3899
Kf-Ef_synthetic	GACACTTCC	140.753	144.271	132.576	279.894
Kf-Ef_synthetic	GAGCGACTA	151.894	140.962	126.403	302.741
Kf-Ef_synthetic	GTCAACGGG	60.4125	67.6498	82.5707	147.588
Kf-Ef_synthetic	TAGCAGGAA	24.7927	21.3244	19.8324	63.3608
Kf-Ef_synthetic	TGCCACACA	NA	NA	0.69452	NA
Kf-Er-Of-Sf_synthetic	AGAAAGCGG	154.64	179.199	168.923	185.767
Kf-Er-Of-Sf_synthetic	CAAACTAAC	43.4656	46.0313	43.9091	68.8439
Kf-Er-Of-Sf_synthetic	CAAGCCTCC	211.914	218.685	246.477	240.395
Kf-Er-Of-Sf_synthetic	GAAGGCGAA	139.969	163.757	152.177	250.6
Kf-Er-Of-Sf_synthetic	GCGCTAACT	177.236	153.389	164.293	254.611
Kf-Er-Of-Sf_synthetic	GTCTCATAC	52.2529	75.6649	66.9054	98.4428
Kf-Er-Of-Sf_synthetic	TGAGTCTCA	137.458	150.889	141.991	168.708
Kf-Er-Of-Sf_synthetic	TGGTGAGGA	171.116	164.198	156.421	205.618
Kf-Er-Of-Sr_synthetic	ACATTGCGG	596.201	692.822	599.062	648.89
Kf-Er-Of-Sr_synthetic	AGGAACTAT	5.49204	2.57363	1.08036	4.92468
Kf-Er-Of-Sr_synthetic	CATTGTCGG	164.369	178.096	174.247	167.845
Kf-Er-Of-Sr_synthetic	CGCAAAGAT	251.3	208.244	253.963	264.765
Kf-Er-Of-Sr_synthetic	GACTCTTTA	195.674	194.273	195.932	192.062
Kf-Er-Of-Sr_synthetic	GCAACTATA	269.346	305.454	307.209	387.577
Kf-Er-Of-Sr_synthetic	TGACGGAGG	536.651	480.167	559.86	498.408
Kf-Er-Of-Sr_synthetic	TGTTGTAGC	479.612	461.931	492.723	599.135
Kf-Er-Of_synthetic	AACGGAGGC	91.874	85.2241	77.1689	151.65
Kf-Er-Of_synthetic	AATAGGTGG	57.9803	50.958	73.6963	125.452
Kf-Er-Of_synthetic	AGCAAGGAG	191.123	196.037	158.273	390.014
Kf-Er-Of_synthetic	GCCCTAGGA	117.294	110.446	127.715	235.166
Kf-Er-Of_synthetic	GTCTAATCT	8.39498	7.05911	11.1123	24.3695
Kf-Er-Of_synthetic	TATCTGAGG	144.127	135.741	157.81	236.08
Kf-Er-Of_synthetic	TCAGCGATG	198.89	185.302	172.935	393.771
Kf-Er-Of_synthetic	TTAGGCTAT	116.588	110.96	120.461	245.218
Kf-Er-Or-Sf_synthetic	AGGCCAAGA	406.411	404.869	408.378	600.607
Kf-Er-Or-Sf_synthetic	ATTTGCGTA	377.774	346.264	363.311	481.958
Kf-Er-Or-Sf_synthetic	CACCAATCA	115.333	120.887	131.341	125.503
Kf-Er-Or-Sf_synthetic	CCTTTCCCG	221.016	179.272	188.446	208.766
Kf-Er-Or-Sf_synthetic	GTCGCCACA	124.277	125.887	121.618	170.485
Kf-Er-Or-Sf_synthetic	TCGCTATGT	173.784	185.522	189.527	204.958
Kf-Er-Or-Sf_synthetic	TGAGATTCC	203.206	191.699	197.552	167.794
Kf-Er-Or-Sf_synthetic	TGGTACGCC	90.4618	94.9304	89.4387	88.0349
Kf-Er-Or-Sr_synthetic	AATATCCTC	324.501	323.175	316.007	386.156
Kf-Er-Or-Sr_synthetic	AATGCGATC	248.868	285.968	268.471	334.98
Kf-Er-Or-Sr_synthetic	CACGCAGTC	258.361	234.054	267.082	253.748
Kf-Er-Or-Sr_synthetic	CTATTCTGC	127.494	108.975	133.579	135.556
Kf-Er-Or-Sr_synthetic	GCTAAAGGA	195.831	232.583	219.623	270.553
Kf-Er-Or-Sr_synthetic	GGTTACGAC	198.027	183.831	205.192	224.91
Kf-Er-Or-Sr_synthetic	GGTTTGATC	215.053	180.522	204.729	231.511
Kf-Er-Or-Sr_synthetic	GTTCTATGA	308.417	272.143	245.937	339.092
Kf-Er-Or_synthetic	ACCTGCACA	45.0348	40.3693	39.2018	54.273
Kf-Er-Or_synthetic	CTACCATCA	NA	NA	NA	NA
Kf-Er-Or_synthetic	GCACCTTAT	8.00269	13.8976	7.09954	16.3479
Kf-Er-Or_synthetic	GCTACTAGG	119.256	102.798	126.788	153.934
Kf-Er-Or_synthetic	GTAATGCCC	357.689	299.865	310.065	489.421
Kf-Er-Or_synthetic	TACTGCTGG	409.236	473.549	420.879	466.575
Kf-Er-Or_synthetic	TCCTTTAGC	31.0693	31.6925	33.1055	34.6758
Kf-Er-Or_synthetic	TTCTCTGTC	224.311	213.097	217.153	248.112
Kf-Er-Sf-Of_synthetic	ATACCAAAC	56.0973	52.2815	44.2178	83.4149
Kf-Er-Sf-Of_synthetic	CACCTGAGA	140.753	147.285	132.036	154.95
Kf-Er-Sf-Of_synthetic	GAACGCTAA	152.757	179.493	201.719	206.735
Kf-Er-Sf-Of_synthetic	GCCGTAGCA	64.3354	63.6791	81.7219	89.5073
Kf-Er-Sf-Of_synthetic	GGTAGTAGA	103.8	93.2391	87.8954	131.088
Kf-Er-Sf-Of_synthetic	TATTTGGGC	141.459	158.095	130.878	166.525
Kf-Er-Sf-Of_synthetic	TGAGGTACA	268.561	288.247	286.219	291.622
Kf-Er-Sf-Of_synthetic	TGGGCTGAA	45.8193	37.6486	39.9735	54.6284
Kf-Er-Sf-Or_synthetic	ATGGTTGGA	219.917	175.375	227.417	261.922
Kf-Er-Sf-Or_synthetic	CGATACTCT	360.827	341.558	358.604	295.836
Kf-Er-Sf-Or_synthetic	CTGACGGTG	309.908	290.527	309.833	280.656
Kf-Er-Sf-Or_synthetic	CTTCCTGGT	19.3006	20.0008	28.6297	30.665
Kf-Er-Sf-Or_synthetic	TCGTACCAG	6.59045	8.97095	1.77488	11.2201
Kf-Er-Sf-Or_synthetic	TGTCCTAAC	15.77	17.6478	11.421	28.0757
Kf-Er-Sf-Or_synthetic	TTTATCAGG	2.0399	2.05891	3.24109	2.43695
Kf-Er-Sf-Or_synthetic	TTTGGGAGG	180.061	180.301	199.096	189.625
Kf-Er-Sf_synthetic	AAGTTAGCT	148.756	121.77	99.4707	234.963
Kf-Er-Sf_synthetic	AGTTAGTCC	191.594	187.508	207.43	439.159
Kf-Er-Sf_synthetic	ATGGCTTTC	7.21811	7.20618	8.1799	25.1818
Kf-Er-Sf_synthetic	CAAGTCGGT	84.0283	84.6358	99.7022	147.639
Kf-Er-Sf_synthetic	CCAGTTATC	142.322	141.771	152.949	191.047
Kf-Er-Sf_synthetic	CTCGTGGTT	300.179	326.337	379.825	138.652
Kf-Er-Sf_synthetic	TCCGTCCAA	139.263	140.3	130.493	230.851
Kf-Er-Sf_synthetic	TTCAATCCG	96.66	122.137	85.1173	175.41
Kf-Er-Sr-Of_synthetic	AAACCAGAC	153.228	157.433	148.01	175.41
Kf-Er-Sr-Of_synthetic	AGTACGAAG	55.705	53.4581	54.2497	61.9392
Kf-Er-Sr-Of_synthetic	AGTGACTTG	214.739	193.243	197.552	242.528
Kf-Er-Sr-Of_synthetic	CACATAATC	98.3076	92.4302	120.306	108.647
Kf-Er-Sr-Of_synthetic	CCAAGCCAT	52.4882	54.4875	50.6228	53.9176
Kf-Er-Sr-Of_synthetic	CTAAAGCAT	37.4244	34.0455	29.0927	35.6912
Kf-Er-Sr-Of_synthetic	GGGTAGCCA	365.142	352.882	354.514	456.523
Kf-Er-Sr-Of_synthetic	TTGACGGAG	95.4831	93.8274	118.454	109.511
Kf-Er-Sr-Or_synthetic	AATAGAGCT	11.0625	15.3683	23.305	22.4403
Kf-Er-Sr-Or_synthetic	AGTAAGTTC	157.622	175.742	181.038	140.582
Kf-Er-Sr-Or_synthetic	CATGCATAT	48.8007	40.5164	47.2274	47.8252
Kf-Er-Sr-Or_synthetic	CCAATGTCT	NA	NA	0.540182	NA
Kf-Er-Sr-Or_synthetic	GGAGCAACG	119.57	95.0039	103.869	116.72
Kf-Er-Sr-Or_synthetic	GGATAGACG	222.428	240.304	236.6	216.787
Kf-Er-Sr-Or_synthetic	GGCGAGAAT	6.43354	4.11782	6.48219	9.13857
Kf-Er-Sr-Or_synthetic	TATTCGTAC	22.282	18.236	17.4402	20.1049
Kf-Er-Sr_synthetic	AGACGGTCT	183.983	173.022	157.733	262.328
Kf-Er-Sr_synthetic	ATGCTGGTT	235.059	210.082	169.926	353.155
Kf-Er-Sr_synthetic	CGATTGAGT	47.7023	38.0898	46.2242	67.2701
Kf-Er-Sr_synthetic	GATGGTATG	122.629	156.33	103.483	170.384
Kf-Er-Sr_synthetic	GCAACTTGG	214.974	214.053	185.977	318.581
Kf-Er-Sr_synthetic	GGTCCAGCA	382.168	341.999	343.556	700.472
Kf-Er-Sr_synthetic	GTACGTTGA	5.80587	8.45623	9.02876	28.025
Kf-Er-Sr_synthetic	GTCCGAGTT	133.692	118.387	113.747	207.192
Kf-Er_synthetic	AAGGTCAGC	31.54	26.4717	22.0703	22.9987
Kf-Er_synthetic	ACATAAGTG	106.938	101.475	91.4451	212.37
Kf-Er_synthetic	ACGACTGTA	98.1507	115.005	95.9981	240.243
Kf-Er_synthetic	AGCGGCGAT	67.3952	51.9139	58.3397	137.282
Kf-Er_synthetic	CTCACGACC	34.286	24.9275	32.5653	54.4761
Kf-Er_synthetic	CTGCAATTA	29.5786	24.6334	27.5493	56.4053
Kf-Er_synthetic	GCAGGCGTA	209.639	195.155	195.546	461.396
Kf-Er_synthetic	GCCCTAAAT	126.631	125.005	117.76	297.816
Kf-Of-Ef-Sf_synthetic	ACTACACTC	77.8301	82.3563	65.3621	102.758
Kf-Of-Ef-Sf_synthetic	AGGCATTCT	276.485	284.938	247.712	332.39
Kf-Of-Ef-Sf_synthetic	AGGGTTGCG	251.222	260.305	226.722	269.943
Kf-Of-Ef-Sf_synthetic	CGCCGAAGA	96.9738	82.0622	87.2009	100.88
Kf-Of-Ef-Sf_synthetic	GCCTACCTG	195.831	169.272	155.572	191.656
Kf-Of-Ef-Sf_synthetic	TCACCAGAA	222.585	201.405	204.806	206.633
Kf-Of-Ef-Sf_synthetic	TTAGTGCAT	81.8314	86.9889	113.052	116.009
Kf-Of-Ef-Sf_synthetic	TTTCTGCCC	286.606	243.981	284.367	250.397
Kf-Of-Ef-Sr_synthetic	AACTACTGA	71.7889	89.4154	89.9018	108.495
Kf-Of-Ef-Sr_synthetic	ACGGTCCCA	222.114	237.069	217.539	255.068
Kf-Of-Ef-Sr_synthetic	ATGCCAAGC	221.016	235.671	218.156	249.991
Kf-Of-Ef-Sr_synthetic	CAATTGGAA	203.441	169.051	189.835	190.742
Kf-Of-Ef-Sr_synthetic	CATCAAGGA	6.74737	14.1182	5.47899	10.1032
Kf-Of-Ef-Sr_synthetic	CGCTGAACG	106.781	68.3116	95.7666	72.2963
Kf-Of-Ef-Sr_synthetic	TCAACCTCA	8.39498	19.5596	18.6749	16.9064
Kf-Of-Ef-Sr_synthetic	TTAAGGGCT	1.09841	3.16189	3.4726	5.3816
Kf-Of-Ef_synthetic	ACTTCCGTT	779.635	842.387	849.552	656.556
Kf-Of-Ef_synthetic	AGTCCACAA	300.415	306.189	302.734	485.004
Kf-Of-Ef_synthetic	CATACCTTC	65.1199	84.8564	59.5744	98.5951
Kf-Of-Ef_synthetic	CGATACGTG	50.1345	28.457	44.4493	58.9946
Kf-Of-Ef_synthetic	CTTGACAAG	NA	NA	NA	NA
Kf-Of-Ef_synthetic	GAACCGGTG	108.742	118.24	116.139	166.576
Kf-Of-Ef_synthetic	GACTTCAGT	12.3963	14.1918	14.5849	30.2081
Kf-Of-Ef_synthetic	TCATCAAGC	220.937	175.742	185.746	273.497
Kf-Of-Er-Sf_synthetic	AAACGGTTA	150.953	133.608	125.322	150.177
Kf-Of-Er-Sf_synthetic	AAGGCGAAT	252.399	231.701	256.201	299.948
Kf-Of-Er-Sf_synthetic	ACTTGCGTC	429.399	421.635	406.14	495.26
Kf-Of-Er-Sf_synthetic	ATTCTATCG	215.288	239.422	212.755	251.615
Kf-Of-Er-Sf_synthetic	GCGTTACCT	111.096	114.122	96.3068	147.334
Kf-Of-Er-Sf_synthetic	GTTGTTGGA	235.687	198.39	225.796	288.83
Kf-Of-Er-Sf_synthetic	TCTCCTGGA	179.433	184.419	167.765	172.821
Kf-Of-Er-Sf_synthetic	TTGAAGCAA	212.15	221.7	225.102	245.168
Kf-Of-Er-Sr_synthetic	AGGATCAGA	274.916	298.689	291.004	306.142
Kf-Of-Er-Sr_synthetic	CATGCAGTA	400.605	387.369	386.23	450.379
Kf-Of-Er-Sr_synthetic	CGAGGAACG	68.729	61.5466	92.6027	71.9409
Kf-Of-Er-Sr_synthetic	CGCGATTGC	600.516	482.74	586.947	522.676
Kf-Of-Er-Sr_synthetic	GAATAGAGT	78.0655	64.1938	88.0497	82.2979
Kf-Of-Er-Sr_synthetic	TACTTATCC	550.224	583.48	563.487	525.468
Kf-Of-Er-Sr_synthetic	TCGCTTTAT	196.615	215.818	197.938	204.095
Kf-Of-Er-Sr_synthetic	TCTACTATG	230.587	233.686	258.361	224.707
Kf-Of-Er_synthetic	AGAAACCGA	323.168	361.191	343.633	427.431
Kf-Of-Er_synthetic	ATGTGGTTG	52.1744	55.8846	44.758	82.2979
Kf-Of-Er_synthetic	CAGTGATTA	316.263	332.734	334.759	511.303
Kf-Of-Er_synthetic	CGGACAATT	90.7756	68.1646	99.0849	110.171
Kf-Of-Er_synthetic	CTAATTCGT	15.6916	19.1184	27.1635	27.365
Kf-Of-Er_synthetic	GGGTAACTC	70.4551	79.8562	87.0465	91.5381
Kf-Of-Er_synthetic	TCAATAAGC	135.104	112.284	105.258	166.576
Kf-Of-Er_synthetic	TCTCCCTCG	36.7182	31.5454	26.3918	34.9804
Kf-Of-Sf-Ef_synthetic	ACTAGTCTA	137.615	116.255	143.38	94.6858
Kf-Of-Sf-Ef_synthetic	ATCCTGGAT	294.53	330.528	340.778	257.606
Kf-Of-Sf-Ef_synthetic	ATTGGCCAG	147.108	147.432	112.281	167.236
Kf-Of-Sf-Ef_synthetic	CCTAAGTAT	49.5853	53.7522	47.4589	38.2805
Kf-Of-Sf-Ef_synthetic	GCCATGTTA	24.4004	23.898	31.1762	19.7495
Kf-Of-Sf-Ef_synthetic	GGCGACTGA	239.532	214.273	194.003	196.886
Kf-Of-Sf-Ef_synthetic	TAAGCGCGC	341.37	358.471	385.459	301.421
Kf-Of-Sf-Ef_synthetic	TGCTGGACT	340.507	359.206	307.055	268.471
Kf-Of-Sf-Er_synthetic	AAAGCATCT	335.956	348.985	271.866	241.258
Kf-Of-Sf-Er_synthetic	ATCTCGATA	71.0043	63.532	66.5196	61.5331
Kf-Of-Sf-Er_synthetic	CGTAGAACT	183.277	135.961	197.167	157.285
Kf-Of-Sf-Er_synthetic	CGTATCCTC	117.059	83.3858	109.58	77.4748
Kf-Of-Sf-Er_synthetic	GGATTCAAT	225.174	228.612	207.353	179.319
Kf-Of-Sf-Er_synthetic	GGTGCCGAA	216.465	215.376	274.181	215.975
Kf-Of-Sf-Er_synthetic	TCCGGTTAT	237.805	238.172	244.934	200.947
Kf-Of-Sf-Er_synthetic	TTCGACCAA	258.126	256.334	254.194	214.655
Kf-Of-Sf_synthetic	CCAGCCTCA	134.947	127.064	117.297	364.528
Kf-Of-Sf_synthetic	GACCCACAC	121.06	113.681	109.117	380.063
Kf-Of-Sf_synthetic	GAGTCTGAG	87.8727	94.1215	78.3264	277.153
Kf-Of-Sf_synthetic	GCAGCGATT	83.5575	74.3413	71.0726	221.407
Kf-Of-Sf_synthetic	GCATTTGGA	354.629	297.439	308.135	1007.48
Kf-Of-Sf_synthetic	TACATAGTC	72.1027	54.414	58.4169	187.29
Kf-Of-Sf_synthetic	TGGCCTACT	NA	NA	NA	NA
Kf-Of-Sf_synthetic	TGGCTTGCT	60.6479	67.7234	60.5776	243.898
Kf-Of-Sr-Ef_synthetic	AGCCCATGT	59.0787	82.2828	68.2173	49.2468
Kf-Of-Sr-Ef_synthetic	CAAAGCGCC	26.9895	43.9724	34.9575	23.0495
Kf-Of-Sr-Ef_synthetic	CCAGACGAA	800.818	806.871	809.733	481.958
Kf-Of-Sr-Ef_synthetic	CGAATTAAG	27.3033	19.6332	43.9091	18.7848
Kf-Of-Sr-Ef_synthetic	GGACAATCC	115.725	124.049	114.519	115.806
Kf-Of-Sr-Ef_synthetic	TACGCTTCT	4.39363	3.23543	3.54977	5.28007
Kf-Of-Sr-Ef_synthetic	TCCTGCTTG	217.328	238.098	197.089	140.328
Kf-Of-Sr-Ef_synthetic	TGGCTAATA	303.318	310.822	360.533	190.285
Kf-Of-Sr-Er_synthetic	ACCGTTTCC	488.164	533.036	492.955	340.056
Kf-Of-Sr-Er_synthetic	CGAGTTGGA	733.031	606.79	768.757	532.271
Kf-Of-Sr-Er_synthetic	CGTTGCAAA	143.735	117.872	141.451	104.535
Kf-Of-Sr-Er_synthetic	GAGATATGC	1009.36	984.305	1013.61	544.456
Kf-Of-Sr-Er_synthetic	GCAAGTTAG	63.08	57.87	64.9762	49.196
Kf-Of-Sr-Er_synthetic	GCACATCCA	432.773	373.103	409.227	446.978
Kf-Of-Sr-Er_synthetic	GTAACTACC	120.04	119.49	129.721	113.623
Kf-Of-Sr-Er_synthetic	TCAGTGGCC	80.9684	97.8716	72.2301	61.5838
Kf-Of-Sr_synthetic	ACCACAAGA	291.784	271.776	275.493	696.055
Kf-Of-Sr_synthetic	CAACTGACA	139.812	99.0482	131.11	280.097
Kf-Of-Sr_synthetic	CATGAAGAG	12.7886	8.82389	12.6557	39.3466
Kf-Of-Sr_synthetic	CTAGTCTTG	88.1865	80.0033	95.4579	175.41
Kf-Of-Sr_synthetic	GAAGAGGAA	122.08	133.094	107.728	267.202
Kf-Of-Sr_synthetic	GACACGTCT	212.464	174.566	181.733	373.615
Kf-Of-Sr_synthetic	GCATCTCCA	45.427	48.1637	41.9027	154.29
Kf-Of-Sr_synthetic	GGCAGCCTT	174.804	124.637	142.608	432.204
Kf-Of_synthetic	CAGTCAGTG	1.64761	1.91184	0.926027	4.97545
Kf-Of_synthetic	CGGCTTGAA	52.2529	26.104	42.5972	143.628
Kf-Of_synthetic	GCTATACAT	12.8671	6.47085	5.86484	38.8389
Kf-Of_synthetic	GTAGAAGAA	122.473	99.3423	96.4611	461.803
Kf-Of_synthetic	GTTAACAAG	183.199	124.417	124.088	547.299
Kf-Of_synthetic	GTTGTATTC	NA	0.735324	0.926027	NA
Kf-Of_synthetic	TATAACCCG	NA	NA	NA	NA
Kf-Of_synthetic	TCCACGGGA	18.9083	27.7217	13.8904	69.1993
Kf-Or-Ef-Sf_synthetic	ACCGTCACT	391.661	443.4	349.652	321.17
Kf-Or-Ef-Sf_synthetic	CAGCAGTGG	124.905	125.814	108.036	91.1827
Kf-Or-Ef-Sf_synthetic	CGTGTGATT	178.491	138.167	187.829	100.829
Kf-Or-Ef-Sf_synthetic	GCCTGGTCA	120.276	101.475	115.213	90.675
Kf-Or-Ef-Sf_synthetic	GGATTTGCG	101.838	108.681	74.1593	98.1889
Kf-Or-Ef-Sf_synthetic	GTCAACTCG	381.619	362.735	351.659	349.652
Kf-Or-Ef-Sf_synthetic	TCGTGGGAA	202.656	217.141	224.407	212.472
Kf-Or-Ef-Sf_synthetic	TTATGACGG	233.333	241.26	253.191	186.833
Kf-Or-Ef-Sr_synthetic	CAGGCCTAT	178.727	192.949	221.166	146.42
Kf-Or-Ef-Sr_synthetic	CGCAAATTA	89.9911	107.872	109.734	73.1086
Kf-Or-Ef-Sr_synthetic	GTCAAGAGT	NA	NA	NA	NA
Kf-Or-Ef-Sr_synthetic	GTCTTGAAT	325.364	306.115	316.161	299.847
Kf-Or-Ef-Sr_synthetic	GTTCAAAGT	358.552	386.707	397.111	332.999
Kf-Or-Ef-Sr_synthetic	TAATAGGGA	339.957	372.736	346.797	399.762
Kf-Or-Ef-Sr_synthetic	TCGGACTGT	152.208	163.168	148.319	136.368
Kf-Or-Ef-Sr_synthetic	TTGAGTCCG	318.931	351.926	362.617	307.208
Kf-Or-Ef_synthetic	AATCGGCCG	310.065	322.807	324.65	326.095
Kf-Or-Ef_synthetic	AATTTCAGG	312.89	312.072	306.206	271.365
Kf-Or-Ef_synthetic	ACCATTCAA	NA	NA	NA	NA
Kf-Or-Ef_synthetic	ACGTGCTTG	182.728	189.861	159.508	232.577
Kf-Or-Ef_synthetic	ATTTGGTGT	112.116	100.151	101.631	102.758
Kf-Or-Ef_synthetic	CATAATAGC	101.446	74.3413	132.576	89.8626
Kf-Or-Ef_synthetic	CTCGCAATA	309.281	279.276	298.026	273.65
Kf-Or-Ef_synthetic	TTTACGTGT	297.355	356.118	340.392	312.59
Kf-Or-Er-Sf_synthetic	ACAGGACGC	213.013	217.215	205.732	188.001
Kf-Or-Er-Sf_synthetic	ACTTGCCTA	293.824	307.071	242.002	270.908
Kf-Or-Er-Sf_synthetic	AGGTGTAGA	215.916	200.817	213.912	200.439
Kf-Or-Er-Sf_synthetic	CGTATCTGG	283.389	252.143	288.303	196.276
Kf-Or-Er-Sf_synthetic	GGTTTGGCA	655.201	611.422	698.996	615.686
Kf-Or-Er-Sf_synthetic	TGGCACTGC	19.4575	17.0595	26.5461	24.1665
Kf-Or-Er-Sf_synthetic	TGTCACCTC	50.6837	35.6632	34.6488	71.027
Kf-Or-Er-Sf_synthetic	TTCGTACTC	253.811	229.053	247.326	220.595
Kf-Or-Er-Sr_synthetic	AGCAGAGGA	141.459	161.257	137.283	99.2043
Kf-Or-Er-Sr_synthetic	CACGCCTAA	378.48	435.312	417.561	281.316
Kf-Or-Er-Sr_synthetic	CGTTAGCAT	363.652	298.468	366.089	306.498
Kf-Or-Er-Sr_synthetic	CTCAACACC	382.325	368.103	393.947	314.215
Kf-Or-Er-Sr_synthetic	GATGTCCGC	485.34	462.74	444.724	474.394
Kf-Or-Er-Sr_synthetic	GTATTAGCT	240.395	228.024	266.078	222.778
Kf-Or-Er-Sr_synthetic	TCAGCCAGC	2.27528	2.20597	4.16712	5.53391
Kf-Or-Er-Sr_synthetic	TCAGTATGG	447.131	446.121	440.712	365.492
Kf-Or-Er_synthetic	AGAGAAGGG	245.102	269.57	289.075	197.444
Kf-Or-Er_synthetic	CGGAGTAGC	264.481	248.098	264.072	265.729
Kf-Or-Er_synthetic	CGTAGGATT	222.82	194.346	208.279	221.103
Kf-Or-Er_synthetic	CTTTACGAG	355.884	345.088	419.567	316.804
Kf-Or-Er_synthetic	GCTACGGTA	215.759	225.23	203.031	196.886
Kf-Or-Er_synthetic	TGTTGTGGA	109.684	121.917	130.107	180.081
Kf-Or-Er_synthetic	TTATCGTCC	214.19	208.317	209.899	174.648
Kf-Or-Er_synthetic	TTGCGACGG	NA	NA	NA	NA
Kf-Or-Sf-Ef_synthetic	AAACCGCAG	265.266	332.219	266.001	148.857
Kf-Or-Sf-Ef_synthetic	ATCGGTTAC	532.728	577.45	504.916	318.632
Kf-Or-Sf-Ef_synthetic	CACCTTAGG	83.1652	71.0323	94.3776	37.4682
Kf-Or-Sf-Ef_synthetic	CCACTGATG	94.3062	87.2094	115.367	64.7823
Kf-Or-Sf-Ef_synthetic	GGAAATCAT	232.941	240.083	262.451	190.742
Kf-Or-Sf-Ef_synthetic	GTAACGAGG	392.446	423.988	409.535	243.035
Kf-Or-Sf-Ef_synthetic	TACAGCCGT	98.8568	111.475	90.2104	55.0345
Kf-Or-Sf-Ef_synthetic	TGATCTGAG	461.41	499.653	462.242	245.777
Kf-Or-Sf-Er_synthetic	AGCGAACAG	216.7	215.597	223.095	87.7811
Kf-Or-Sf-Er_synthetic	AGCGCCTCT	282.997	282.953	251.956	130.428
Kf-Or-Sf-Er_synthetic	CCATACCGC	612.049	630.982	704.706	330.156
Kf-Or-Sf-Er_synthetic	TAGACTGTG	776.81	829.299	753.323	419.257
Kf-Or-Sf-Er_synthetic	TATTGCCTG	587.256	682.822	638.11	400.32
Kf-Or-Sf-Er_synthetic	TGAATCGGC	205.246	190.817	174.788	95.8535
Kf-Or-Sf-Er_synthetic	TGACCAAGA	242.748	226.995	253.423	124.843
Kf-Or-Sf-Er_synthetic	TTCTTGTGG	426.183	502.373	465.637	188.458
Kf-Or-Sf_synthetic	ACGGTCTAG	209.953	189.493	175.096	419.511
Kf-Or-Sf_synthetic	CCTAGCCTC	111.41	118.24	110.043	239.786
Kf-Or-Sf_synthetic	CGACACTGG	2.0399	3.67662	3.16392	9.90012
Kf-Or-Sf_synthetic	GAGTCGGCT	291.706	238.172	254.426	636.096
Kf-Or-Sf_synthetic	GTTCCACAA	206.03	176.331	171.469	411.185
Kf-Or-Sf_synthetic	TAAGACCCG	80.89	92.7979	85.1945	165.205
Kf-Or-Sf_synthetic	TCAGCACTT	210.267	188.317	184.897	460.584
Kf-Or-Sf_synthetic	TGAGTCGGG	98.7783	94.7098	86.6607	179.725
Kf-Or-Sr-Ef_synthetic	ACCTAGACT	11.6902	19.4861	13.6589	11.8294
Kf-Or-Sr-Ef_synthetic	CCTATTAAG	119.727	125.446	135.354	79.0994
Kf-Or-Sr-Ef_synthetic	CGGTACGAA	898.184	759.075	970.09	379.606
Kf-Or-Sr-Ef_synthetic	CTCGTACCA	183.434	186.478	179.109	103.418
Kf-Or-Sr-Ef_synthetic	GCGTTTCGA	120.354	110.078	119.766	65.2393
Kf-Or-Sr-Ef_synthetic	GCTACTTAG	399.821	422.297	425.355	281.316
Kf-Or-Sr-Ef_synthetic	TCCCTGGGA	375.734	428.253	424.12	298.73
Kf-Or-Sr-Ef_synthetic	TGTGTTACT	652.298	629.952	684.951	389.405
Kf-Or-Sr-Er_synthetic	AACCGGTGT	455.369	460.386	450.049	201.201
Kf-Or-Sr-Er_synthetic	AACTGTCAG	363.338	418.179	386.076	183.888
[truncated: 3,438 more rows]

## Sheet: 1E - gWT_SiteComposition
Sequence composition (Primary sites)	Unique Sequences
[truncated: 4 more rows]

[truncated: 8 more sheets: 1F - GEN_LibraryCompositi, 1G - GEN_LibraryDesign, 1H - GEN_ExpressionSummary, 1I - GEN_all_RPM, 1J - MiniSpacer_SpacerSequence , 1K - MiniSpacer_LibraryDesign, 1L - MiniSpacer_ExpSummary, 1M - MiniSpacer_all_RPM]
