# Supplementary material for: Synthetic and genomic regulatory elements reveal aspects of cis-regulatory grammar in mouse embryonic stem cells
Source: eLife. 2020 Feb 11;9:e41279. doi: 10.7554/eLife.41279 (PMC7077988; doi:10.7554/eLife.41279)
Supplement: Supplementary file 2. [file elife-41279-supp2.xlsx]

## Sheet: 2A - iRF SYN features
Model comparison	Independent model	Independent + Position model
Test Set, R^2 (overall)	0.56	0.87
Test Set, R^2 (4mers)	0	0.52
Features included			Source
O_presence	Yes	Yes	Same terms used for SYN iRF Billboard Model. Identity of TFBS present in the sequence are determined via FIMO.
S_presence	Yes	Yes
K_presence	Yes	Yes
E_presence	Yes	Yes
Position.4_O	(-)	Yes	Same terms used for SYN Billboard + Position iRF Model. Relative position of pluripotency TFBS as determined via FIMO; as sequences contain only three primary sites Position.1 is FALSE for all factors and omitted from table.
Position.4_S	(-)	Yes
Position.4_K	(-)	Yes
Position.4_E	(-)	Yes
Position.3_O	(-)	Yes
Position.3_S,	(-)	Yes
Position.3_K	(-)	Yes
Position.3_E	(-)	Yes
Position.2_O	(-)	Yes
Position.2_S	(-)	Yes
Position.2_K	(-)	Yes
Position.2_E	(-)	Yes
Position.1_O	(-)	Yes
Position.1_S	(-)	Yes
Position.1_K	(-)	Yes
Position.1_E	(-)	Yes

## Sheet: 2B - iRF GEN features
Model Comparison	Independent	Positional	Spacing	Primary sites	ChIP	All
AUROC	0.52	0.47	0.52	0.64	0.56	0.67
AUPRC	0.22	0.25	0.31	0.34	0.29	0.46
Features included							Source
O_presence	Yes	Yes	(-)	(-)	(-)	(-)	Same terms used for SYN iRF Billboard Model. Identity of TFBSs present in the sequence are determined via FIMO.
S_presence	Yes	Yes	(-)	(-)	(-)	(-)
K_presence	Yes	Yes	(-)	(-)	(-)	(-)
E_presence	Yes	Yes	(-)	(-)	(-)	(-)
Position.4_O	(-)	Yes	(-)	(-)	(-)	(-)	Same terms used for SYN Positional iRF Model. Relative position of pluripotency TFBSs as determined via FIMO; as sequences contain only three primary sites Position.1 is FALSE for all factors and omitted from table.
Position.4_S	(-)	Yes	(-)	(-)	(-)	(-)
Position.4_K	(-)	Yes	(-)	(-)	(-)	(-)
Position.4_E	(-)	Yes	(-)	(-)	(-)	(-)
Position.3_O	(-)	Yes	(-)	(-)	(-)	(-)
Position.3_S,	(-)	Yes	(-)	(-)	(-)	(-)
Position.3_K	(-)	Yes	(-)	(-)	(-)	(-)
Position.3_E	(-)	Yes	(-)	(-)	(-)	(-)
Position.2_O	(-)	Yes	(-)	(-)	(-)	(-)
Position.2_S	(-)	Yes	(-)	(-)	(-)	(-)
Position.2_K	(-)	Yes	(-)	(-)	(-)	(-)
Position.2_E	(-)	Yes	(-)	(-)	(-)	(-)
Distance_O.S	(-)	(-)	Yes	(-)	(-)	Yes	Distance between FIMO identified sites (OCT4, SOX2, KLF4, & ESRRB); if a site is absent from the sequence distance between the two factors is sent to total length of sequence (81 or 82 bps).
Distance_K.E	(-)	(-)	Yes	(-)	(-)	Yes
Distance_K.O	(-)	(-)	Yes	(-)	(-)	Yes
Distance_K.S	(-)	(-)	Yes	(-)	(-)	Yes
Distance_E.S	(-)	(-)	Yes	(-)	(-)	Yes
Distance_E.O	(-)	(-)	Yes	(-)	(-)	Yes
Distance_1.2	(-)	(-)	Yes	(-)	(-)	Yes	Distance between sites, regardless of identity, present in sequences (1st to 2nd, 2nd to 3rd site).
Distance_2.3	(-)	(-)	Yes	(-)	(-)	Yes
Total_spacing	(-)	(-)	(-)	(-)	(-)	Yes	Sum of ‘Distance_1.2’ and ‘Distance_2.3’
Oct4.site_affinity	(-)	(-)	(-)	Yes	(-)	Yes	Scores assigned by FIMO, a log-likelihood score ratio based on the PWM provided (Grant et al. 2011).
Sox2.site_affinity	(-)	(-)	(-)	Yes	(-)	Yes
Klf4.site_affinity	(-)	(-)	(-)	Yes	(-)	Yes
Esrrb.site_affinity	(-)	(-)	(-)	Yes	(-)	Yes
OSKE_TotalAffinity	(-)	(-)	(-)	(-)	(-)	Yes	Sum of OCT4, SOX2, KLF4, & ESRRB site affinities for each sequence (above terms)
Oct4.Occ_10	(-)	(-)	(-)	(-)	(-)	Yes	Total predicted occupancy across the sequence for each pluripotency factor, annotated with custom code (See Methods)
Sox2.Occ_8	(-)	(-)	(-)	(-)	(-)	Yes
Klf4.Occ_8	(-)	(-)	(-)	(-)	(-)	Yes
Essrb.Occ_8	(-)	(-)	(-)	(-)	(-)	Yes
OSKE_P(Occ)	(-)	(-)	(-)	(-)	(-)	Yes	Sum of predicted occupancies for pluripotency factors (above terms)
Klf1_Mut.count	(-)	(-)	(-)	(-)	(-)	Yes	Number of identified sites for gMUT sequences scanned using FIMO with PWMs of SVM supported factors. gMUT sequences were scored to prevent assigning a score for another factor to any of the primary pluripotency sites.
REST_Mut.count	(-)	(-)	(-)	(-)	(-)	Yes
FOXA1_Mut.count	(-)	(-)	(-)	(-)	(-)	Yes
FOXM1_Mut.count	(-)	(-)	(-)	(-)	(-)	Yes
TCF7_Mut.count	(-)	(-)	(-)	(-)	(-)	Yes
NANOG_Mut.count	(-)	(-)	(-)	(-)	(-)	Yes
KLF1_Mut.TotalAffinity	(-)	(-)	(-)	(-)	(-)	Yes	Sum of scores assigned for FIMO scanning with PWMs of SVM supported factors for gMUT sequences. gMUT sequences were scored to prevent assigning a score for another factor to primary pluripotency sites.
REST_Mut.TotalAffinity	(-)	(-)	(-)	(-)	(-)	Yes
FOXA1_Mut.TotalAffinity	(-)	(-)	(-)	(-)	(-)	Yes
FOXM1_Mut.TotalAffinity	(-)	(-)	(-)	(-)	(-)	Yes
TCF7_Mut.TotalAffinity	(-)	(-)	(-)	(-)	(-)	Yes
NANOG_Mut.TotalAffinity	(-)	(-)	(-)	(-)	(-)	Yes
SVM_TotalAffinity	(-)	(-)	(-)	(-)	(-)	Yes	Sum of KLF1, REST, FOXA1, FOXM1, TCF7, & Nanog site affinities (above).
Total_site_affinity	(-)	(-)	(-)	(-)	(-)	Yes	Sum of ‘SVM_TotalAffinity’ and ‘OSKE_TotalAffinity’.
Oct4_ChIP	(-)	(-)	(-)	(-)	Yes	Yes	Chen et al. ChIP-seq overlaps. GEO dataset: GSE11431; GEO IDs: GSM288346 (O), GSM288347 (S), GSM288354 (K), GSM288355 (E); E14 mESCs.
Sox2_ChIP	(-)	(-)	(-)	(-)	Yes	Yes
Klf4_ChIP	(-)	(-)	(-)	(-)	Yes	Yes
Essrb_ChIP	(-)	(-)	(-)	(-)	Yes	Yes
Nanog	(-)	(-)	(-)	(-)	Yes	Yes	Additional ChIP-seq peaks from Chen et al. GEO dataset: GSE11431; GEO IDs: GSM288345 (Nanog), GSM288350 (Tcfcp2I1), GSM288351 (CTCF), GSM288359 (p300); E14 mESCs.
Tcfcp2I1	(-)	(-)	(-)	(-)	Yes	Yes
CTCF	(-)	(-)	(-)	(-)	Yes	Yes
p300	(-)	(-)	(-)	(-)	Yes	Yes
Peak_count	(-)	(-)	(-)	(-)	(-)	Yes	Total overlapping pluripotency ChIP seq signals for all peaks from Chen et al. (above), including O,S,K,E, Nanog, Tcfcp2I1, CTCF, & p300.
REST	(-)	(-)	(-)	(-)	Yes	Yes	ChIP-seq from Yu et al. PMID: 21632747; GEO dataset: GSE28233; GEO ID: GSM698696; E14 mESCs.
Mtf2	(-)	(-)	(-)	(-)	Yes	Yes	ChIP-seq from Perino et al. PMID: 29808031; GEO dataset: GSE94300; MAnorm bed files from dataset used for respective factors; E14 mESCs.
Ezh2	(-)	(-)	(-)	(-)	Yes	Yes
H3K27me3	(-)	(-)	(-)	(-)	Yes	Yes
H3K4me3	(-)	(-)	(-)	(-)	Yes	Yes
ATAC	(-)	(-)	(-)	(-)	Yes	Yes	ATAC-seq from Wu et al. PMID: 27309802; GEO ID: GSM2156965; 50k cell stage of mESCs.
H3K27ac	(-)	(-)	(-)	(-)	Yes	Yes	All files downloaded from www.encodeproject.org. Note: all data sets from Yue et al. (PMID: 25409824) are under review due to library complexity and/or read depth issues. E14 mESCs.
H3K36me3	(-)	(-)	(-)	(-)	Yes	Yes
H3K4me1Ren	(-)	(-)	(-)	(-)	Yes	Yes
H3K4me1Snyder	(-)	(-)	(-)	(-)	Yes	Yes
H3K4me3Ren	(-)	(-)	(-)	(-)	Yes	Yes
H3K4me3Snyder	(-)	(-)	(-)	(-)	Yes	Yes
H3K9ac	(-)	(-)	(-)	(-)	Yes	Yes
H3K9me3	(-)	(-)	(-)	(-)	Yes	Yes

## Sheet: 2C - gkmSVM_8merScoredWeights
#k-mer	revcomp	SVM-weight
TGCAAATG	CATTTGCA	1.4378
TTTGCATA	TATGCAAA	1.4378
TGCAAATC	GATTTGCA	1.38266
TTTGCATA	TATGCAAA	1.38266
ATGCAAAT	ATTTGCAT	1.35835
TTGCATAT	ATATGCAA	1.35835
TGCAAATT	AATTTGCA	1.3392
TTTGCATA	TATGCAAA	1.3392
ATGCAAAT	ATTTGCAT	1.31356
TTGCATAA	TTATGCAA	1.31356
TATGCAAA	TTTGCATA	1.22231
TGCATATG	CATATGCA	1.22231
TGCAAATG	CATTTGCA	1.1917
TTTGCATT	AATGCAAA	1.1917
TATGCAAA	TTTGCATA	1.15998
TGCATATT	AATATGCA	1.15998
ATGCAAAT	ATTTGCAT	1.15371
TTGCATAC	GTATGCAA	1.15371
TGCAAATC	GATTTGCA	1.13636
TTTGCATT	AATGCAAA	1.13636
ATGCAAAT	ATTTGCAT	1.1094
TTGCATTT	AAATGCAA	1.1094
ATTTGCAT	ATGCAAAT	1.10781
GCAAATGT	ACATTTGC	1.10781
TGCAAATT	AATTTGCA	1.09274
TTTGCATT	AATGCAAA	1.09274
TGCAAATG	CATTTGCA	1.08259
TTTGCATC	GATGCAAA	1.08259
TATGCAAA	TTTGCATA	1.07758
TGCATATC	GATATGCA	1.07758
ATTTGCAT	ATGCAAAT	1.07668
GCAAATCT	AGATTTGC	1.07668
ATGCAAAT	ATTTGCAT	1.0717
TTGCATAG	CTATGCAA	1.0717
TAACAATG	CATTGTTA	1.06501
TTGTTATG	CATAACAA	1.06501
TATGCAAA	TTTGCATA	1.06452
TGCATAAC	GTTATGCA	1.06452
ATAACAAT	ATTGTTAT	1.05691
TGTTATGC	GCATAACA	1.05691
ATGCAAAA	TTTTGCAT	1.04224
TTGCATAT	ATATGCAA	1.04224
ATTTGCAT	ATGCAAAT	1.04205
GCAAATGC	GCATTTGC	1.04205
AGGTCAAA	TTTGACCT	1.0362
TGACCTTC	GAAGGTCA	1.0362
ATTTGCAT	ATGCAAAT	1.03136
GCAAATTT	AAATTTGC	1.03136
TGCAAATC	GATTTGCA	1.02724
TTTGCATC	GATGCAAA	1.02724
ATAACAAT	ATTGTTAT	1.02477
TGTTATGT	ACATAACA	1.02477
ATTTGCAT	ATGCAAAT	1.00741
GCAAATCC	GGATTTGC	1.00741
ATTTGCAT	ATGCAAAT	1.00631
GCAAATGA	TCATTTGC	1.00631
ATGCAAAC	GTTTGCAT	1.00478
TTGCATAT	ATATGCAA	1.00478
AAACAAAG	CTTTGTTT	1.00258
TTGTTTTG	CAAAACAA	1.00258
ATTTGCAT	ATGCAAAT	1.00105
GCAAATGG	CCATTTGC	1.00105
CATAACAA	TTGTTATG	0.999119
GTTATGCA	TGCATAAC	0.999119
TGCAAATA	TATTTGCA	0.994301
TTTGCATA	TATGCAAA	0.994301
ATTTGCAT	ATGCAAAT	0.987982
GCAAATCG	CGATTTGC	0.987982
TGCAAATT	AATTTGCA	0.983622
TTTGCATC	GATGCAAA	0.983622
ATGCAAAA	TTTTGCAT	0.980327
TTGCATAA	TTATGCAA	0.980327
ATAACAAA	TTTGTTAT	0.975846
TGTTATGC	GCATAACA	0.975846
AACAAAGA	TCTTTGTT	0.975193
TTTGTTTT	AAAACAAA	0.975193
ATTTGCAT	ATGCAAAT	0.974648
GCAAATCA	TGATTTGC	0.974648
TGCAAAAC	GTTTTGCA	0.964111
TTTGCATA	TATGCAAA	0.964111
AACAAAGG	CCTTTGTT	0.953655
TTTGTTTT	AAAACAAA	0.953655
ATGCAAAC	GTTTGCAT	0.950038
TTGCATAA	TTATGCAA	0.950038
AACAAAGC	GCTTTGTT	0.946538
TTTGTTTT	AAAACAAA	0.946538
ATAACAAA	TTTGTTAT	0.943713
TGTTATGT	ACATAACA	0.943713
TATGCAAA	TTTGCATA	0.935744
TGCATATA	TATATGCA	0.935744
CATTACAA	TTGTAATG	0.932827
GTAATGCA	TGCATTAC	0.932827
ATGCAAAT	ATTTGCAT	0.930897
TTGCATTA	TAATGCAA	0.930897
TGCTAATT	AATTAGCA	0.92572
TTAGCATT	AATGCTAA	0.92572
TATGCAAA	TTTGCATA	0.919581
TGCATAAA	TTTATGCA	0.919581
ATGCTAAT	ATTAGCAT	0.911814
TAGCATTT	AAATGCTA	0.911814
TGCTAATG	CATTAGCA	0.910985
TTAGCATT	AATGCTAA	0.910985
TCACAATG	CATTGTGA	0.905129
TTGTGATG	CATCACAA	0.905129
AGGTCAAG	CTTGACCT	0.90502
TGACCTTC	GAAGGTCA	0.90502
TGCAAAAG	CTTTTGCA	0.902636
TTTGCATA	TATGCAAA	0.902636
AAAACAAA	TTTGTTTT	0.89958
TGTTTTGC	GCAAAACA	0.89958
ATTACAAT	ATTGTAAT	0.897692
TGTAATGC	GCATTACA	0.897692
ATCACAAT	ATTGTGAT	0.893673
TGTGATGC	GCATCACA	0.893673
ATTTGCAT	ATGCAAAT	0.883871
GCAAATTA	TAATTTGC	0.883871
AGGTCAAT	ATTGACCT	0.881937
TGACCTTC	GAAGGTCA	0.881937
ATGCAAAG	CTTTGCAT	0.881155
TTGCATAT	ATATGCAA	0.881155
TGCAAACC	GGTTTGCA	0.879145
TTTGCATA	TATGCAAA	0.879145
ATTTGCAT	ATGCAAAT	0.877516
GCAAATTG	CAATTTGC	0.877516
AAAGAAAA	TTTTCTTT	0.874108
TTCTTTTG	CAAAAGAA	0.874108
TGCAAATG	CATTTGCA	0.87187
TTTGCATG	CATGCAAA	0.87187
TATGCAAA	TTTGCATA	0.871829
TGCATAAG	CTTATGCA	0.871829
CATAACAA	TTGTTATG	0.870121
GTTATGTA	TACATAAC	0.870121
AAGGTCAA	TTGACCTT	0.870085
GACCTTCA	TGAAGGTC	0.870085
TAACAAAG	CTTTGTTA	0.86764
TTGTTATG	CATAACAA	0.86764
TGCTAATT	AATTAGCA	0.867116
TTAGCATC	GATGCTAA	0.867116
TAACAATA	TATTGTTA	0.865199
TTGTTATG	CATAACAA	0.865199
GGTCAAAT	ATTTGACC	0.86292
TTGACCTT	AAGGTCAA	0.86292
ATTTGCAT	ATGCAAAT	0.85928
GCAAATTC	GAATTTGC	0.85928
AAAACAAA	TTTGTTTT	0.858204
TGTTTTGT	ACAAAACA	0.858204
TATGCATA	TATGCATA	0.858157
TGCATATG	CATATGCA	0.858157
ATAACAAT	ATTGTTAT	0.857645
TGTTATGA	TCATAACA	0.857645
TAACAATC	GATTGTTA	0.855894
TTGTTATG	CATAACAA	0.855894
GGTCAAAG	CTTTGACC	0.853034
TTGACCTT	AAGGTCAA	0.853034
TGCTAATG	CATTAGCA	0.852381
TTAGCATC	GATGCTAA	0.852381
ATGCTAAA	TTTAGCAT	0.852074
TAGCATTT	AAATGCTA	0.852074
AAAAGAAA	TTTCTTTT	0.850389
TCTTTTGT	ACAAAAGA	0.850389
TATGCAGA	TCTGCATA	0.847874
TGCATATG	CATATGCA	0.847874
GGTCAAAA	TTTTGACC	0.846669
TTGACCTT	AAGGTCAA	0.846669
ATGCTAAT	ATTAGCAT	0.846283
TAGCATTA	TAATGCTA	0.846283
AAACAAAG	CTTTGTTT	0.846103
TTGTTTTC	GAAAACAA	0.846103
GCATAACA	TGTTATGC	0.844493
TTATGCAA	TTGCATAA	0.844493
TGTAAATG	CATTTACA	0.843719
TTTACATT	AATGTAAA	0.843719
AAACAAAT	ATTTGTTT	0.842576
TTGTTTTG	CAAAACAA	0.842576
CCCACCCA	TGGGTGGG	0.841961
GGTGGGGC	GCCCCACC	0.841961
ATATGCAA	TTGCATAT	0.8412
GCATATGC	GCATATGC	0.8412
TAACAATG	CATTGTTA	0.839406
TTGTTATT	AATAACAA	0.839406
CATTACAA	TTGTAATG	0.834542
GTAATGCT	AGCATTAC	0.834542
ATGCAAAA	TTTTGCAT	0.827652
TTGCATAC	GTATGCAA	0.827652
AAACAAAG	CTTTGTTT	0.827097
TTGTTTTA	TAAAACAA	0.827097
ATGCAAAG	CTTTGCAT	0.826415
TTGCATAA	TTATGCAA	0.826415
ATATGCAT	ATGCATAT	0.824014
GCATATGC	GCATATGC	0.824014
AACAAAGT	ACTTTGTT	0.823455
TTTGTTTT	AAAACAAA	0.823455
ATAACAAC	GTTGTTAT	0.821637
TGTTATGC	GCATAACA	0.821637
ATGCAAAT	ATTTGCAT	0.819985
TTGCATTG	CAATGCAA	0.819985
AGGTCAAA	TTTGACCT	0.819599
TGACCTTA	TAAGGTCA	0.819599
AAACAAAC	GTTTGTTT	0.818799
TTGTTTTG	CAAAACAA	0.818799
ATATGCAA	TTGCATAT	0.818067
GCATATGT	ACATATGC	0.818067
TGCAAATC	GATTTGCA	0.816525
TTTGCATG	CATGCAAA	0.816525
AACAATGG	CCATTGTT	0.816241
ATTGTTAT	ATAACAAT	0.816241
ATTTGCAA	TTGCAAAT	0.816082
GCAAATGT	ACATTTGC	0.816082
AAAACAAA	TTTGTTTT	0.814853
TGTTTTGA	TCAAAACA	0.814853
TGTAAATG	CATTTACA	0.810718
TTTACATA	TATGTAAA	0.810718
ATGCAAAT	ATTTGCAT	0.809402
TTGCATTC	GAATGCAA	0.809402
TATGCAAC	GTTGCATA	0.808916
TGCATATG	CATATGCA	0.808916
AAAAGAAA	TTTCTTTT	0.808325
TCTTTTGA	TCAAAAGA	0.808325
TAACAAAA	TTTTGTTA	0.806675
TTGTTATG	CATAACAA	0.806675
TATGCATT	AATGCATA	0.805141
TGCATATG	CATATGCA	0.805141
TATGCATA	TATGCATA	0.803983
TGCATATT	AATATGCA	0.803983
ACAAAGAG	CTCTTTGT	0.802183
CTTTGTTT	AAACAAAG	0.802183
AGGTCAAA	TTTGACCT	0.801575
TGACCTCC	GGAGGTCA	0.801575
AAAAGAAA	TTTCTTTT	0.800111
TCTTTTGC	GCAAAAGA	0.800111
TTACAATG	CATTGTAA	0.79989
TTGTAATG	CATTACAA	0.79989
ATTACAAC	GTTGTAAT	0.799811
TGTAATGC	GCATTACA	0.799811
ATTACAAG	CTTGTAAT	0.799459
TGTAATGC	GCATTACA	0.799459
ATTACAAA	TTTGTAAT	0.79945
TGTAATGC	GCATTACA	0.79945
ATATGCAT	ATGCATAT	0.798296
GCATATGT	ACATATGC	0.798296
CCCCACCC	GGGTGGGG	0.797189
GTGGGGCT	AGCCCCAC	0.797189
ATTTACAT	ATGTAAAT	0.796693
GTAAATGA	TCATTTAC	0.796693
TGCAAACG	CGTTTGCA	0.796129
TTTGCATA	TATGCAAA	0.796129
CATAACAA	TTGTTATG	0.793836
GTTATGTT	AACATAAC	0.793836
TGCAAATG	CATTTGCA	0.793714
TTTGCAAT	ATTGCAAA	0.793714
ATATGCAA	TTGCATAT	0.793582
GCATATGA	TCATATGC	0.793582
AAAAAAAG	CTTTTTTT	0.793463
TTTTTTTT	AAAAAAAA	0.793463
AAAAAAAA	TTTTTTTT	0.793361
TTTTTTTC	GAAAAAAA	0.793361
TGCTAATA	TATTAGCA	0.793079
TTAGCATT	AATGCTAA	0.793079
ATATGCAA	TTGCATAT	0.793077
GCATATTC	GAATATGC	0.793077
ATAACAAG	CTTGTTAT	0.790998
TGTTATGC	GCATAACA	0.790998
ATAACAAC	GTTGTTAT	0.789504
TGTTATGT	ACATAACA	0.789504
AAAAAAAT	ATTTTTTT	0.786754
TTTTTTTT	AAAAAAAA	0.786754
AGGTCAAA	TTTGACCT	0.786696
TGACCTTG	CAAGGTCA	0.786696
ATTAGCAT	ATGCTAAT	0.786674
GCTAATGG	CCATTAGC	0.786674
ATGCTAAA	TTTAGCAT	0.786543
TAGCATTA	TAATGCTA	0.786543
TATGCAAA	TTTGCATA	0.786237
TGCATAAT	ATTATGCA	0.786237
TATGCAGA	TCTGCATA	0.78555
TGCATATT	AATATGCA	0.78555
GAACAAAG	CTTTGTTC	0.785408
TTGTTCTC	GAGAACAA	0.785408
ATTTGCAA	TTGCAAAT	0.784951
GCAAATCT	AGATTTGC	0.784951
ACCTCCAT	ATGGAGGT	0.784682
GGAGGTCA	TGACCTCC	0.784682
AACAATGA	TCATTGTT	0.784544
ATTGTTAT	ATAACAAT	0.784544
ATGCAAAC	GTTTGCAT	0.784445
TTGCATAC	GTATGCAA	0.784445
CATAACAA	TTGTTATG	0.782743
GTTATGCT	AGCATAAC	0.782743
ATATGCAG	CTGCATAT	0.782537
GCATATGC	GCATATGC	0.782537
ATGCAAAA	TTTTGCAT	0.782137
TTGCATTT	AAATGCAA	0.782137
TAACAATT	AATTGTTA	0.78075
TTGTTATG	CATAACAA	0.78075
AATGCAAA	TTTGCATT	0.780616
TGCATTTC	GAAATGCA	0.780616
ATATGCAA	TTGCATAT	0.779929
GCATATGG	CCATATGC	0.779929
ATGCTAAT	ATTAGCAT	0.777298
TAGCATTC	GAATGCTA	0.777298
ATTACAAT	ATTGTAAT	0.777139
TGTAATGT	ACATTACA	0.777139
AACAAAGA	TCTTTGTT	0.777123
TTTGTTCT	AGAACAAA	0.777123
ATGCTAAT	ATTAGCAT	0.776698
TAGCATCT	AGATGCTA	0.776698
ATAACAAA	TTTGTTAT	0.776583
TGTTATGA	TCATAACA	0.776583
TATGCAAT	ATTGCATA	0.775991
TGCATATG	CATATGCA	0.775991
GACCTCCA	TGGAGGTC	0.77421
GAGGTCAA	TTGACCTC	0.77421
GGTGGAGC	GCTCCACC	0.774157
TCCACCCA	TGGGTGGA	0.774157
ATATGCAT	ATGCATAT	0.77381
GCATATGA	TCATATGC	0.77381
TCACAATA	TATTGTGA	0.773768
TTGTGATG	CATCACAA	0.773768
ATATGCAT	ATGCATAT	0.773305
GCATATTC	GAATATGC	0.773305
ATAACAAT	ATTGTTAT	0.772957
TGTTATGG	CCATAACA	0.772957
ATGCAAAT	ATTTGCAT	0.772927
TTGCATCA	TGATGCAA	0.772927
TGCAAATT	AATTTGCA	0.772906
TTTGCATG	CATGCAAA	0.772906
ATGCTAAT	ATTAGCAT	0.772431
TAGCATCA	TGATGCTA	0.772431
AAAGAAAT	ATTTCTTT	0.772219
TTCTTTTG	CAAAAGAA	0.772219
GAACAAAG	CTTTGTTC	0.772213
TTGTTCTG	CAGAACAA	0.772213
AAAAAAAA	TTTTTTTT	0.771475
TTTTTTTT	AAAAAAAA	0.771475
ATTTACAT	ATGTAAAT	0.771243
GTAAATGC	GCATTTAC	0.771243
TGCTAAAC	GTTTAGCA	0.770762
TTAGCATT	AATGCTAA	0.770762
TATGCAAA	TTTGCATA	0.770544
TGCATACC	GGTATGCA	0.770544
AAACAAAA	TTTTGTTT	0.770429
TTGTTTTG	CAAAACAA	0.770429
AGGTCAAC	GTTGACCT	0.770315
TGACCTTC	GAAGGTCA	0.770315
AAAAAAAG	CTTTTTTT	0.769407
TTTTTTTC	GAAAAAAA	0.769407
GACCTCCA	TGGAGGTC	0.768318
GAGGTCAT	ATGACCTC	0.768318
AAAAAAAC	GTTTTTTT	0.766501
TTTTTTTT	AAAAAAAA	0.766501
AAAAAAAA	TTTTTTTT	0.763618
TTTTTTTG	CAAAAAAA	0.763618
AGAACAAA	TTTGTTCT	0.7629
TGTTCTCT	AGAGAACA	0.7629
AAAGAAAC	GTTTCTTT	0.762234
TTCTTTTG	CAAAAGAA	0.762234
TATGCACA	TGTGCATA	0.761374
TGCATATG	CATATGCA	0.761374
CCCACCCA	TGGGTGGG	0.7613
GGTGGGGA	TCCCCACC	0.7613
AAAAAAAT	ATTTTTTT	0.76117
TTTTTTTC	GAAAAAAA	0.76117
CATCACAA	TTGTGATG	0.760617
GTGATGCA	TGCATCAC	0.760617
ATATGCAT	ATGCATAT	0.760157
GCATATGG	CCATATGC	0.760157
ATAACAAG	CTTGTTAT	0.758865
TGTTATGT	ACATAACA	0.758865
AAGGTCAA	TTGACCTT	0.758192
GACCTTCC	GGAAGGTC	0.758192
AATGCAAA	TTTGCATT	0.757028
TGCATTTT	AAAATGCA	0.757028
AACAAAGG	CCTTTGTT	0.755585
TTTGTTCT	AGAACAAA	0.755585
AAAAAAAA	TTTTTTTT	0.753307
TTTTTTGT	ACAAAAAA	0.753307
CCCCACCC	GGGTGGGG	0.752054
GTGGGGCC	GGCCCCAC	0.752054
GGTGGAGA	TCTCCACC	0.751635
TCCACCCA	TGGGTGGA	0.751635
ATTTGCAA	TTGCAAAT	0.751395
GCAAATGC	GCATTTGC	0.751395
CATAACAA	TTGTTATG	0.751192
GTTATGCG	CGCATAAC	0.751192
ATATGCAG	CTGCATAT	0.750578
GCATATGT	ACATATGC	0.750578
ATGCAAAT	ATTTGCAT	0.748904
TTGCATCT	AGATGCAA	0.748904
AACAAAGC	GCTTTGTT	0.748468
TTTGTTCT	AGAACAAA	0.748468
TGCAAATA	TATTTGCA	0.746562
TTTGCATT	AATGCAAA	0.746562
TATGCAAC	GTTGCATA	0.746362
TGCATATT	AATATGCA	0.746362
GGTCAAAC	GTTTGACC	0.746209
TTGACCTT	AAGGTCAA	0.746209
ATGCAAAA	TTTTGCAT	0.745638
TTGCATAG	CTATGCAA	0.745638
ATGCAAAC	GTTTGCAT	0.744534
TTGCATTT	AAATGCAA	0.744534
GGTCAAGA	TCTTGACC	0.744432
TTGACCTT	AAGGTCAA	0.744432
AAAAGAAA	TTTCTTTT	0.744107
TCTTTTAT	ATAAAAGA	0.744107
TATGCATT	AATGCATA	0.742817
TGCATATT	AATATGCA	0.742817
CATTACAA	TTGTAATG	0.742028
GTAATGCC	GGCATTAC	0.742028
CAAAACAA	TTGTTTTG	0.740637
GTTTTGCA	TGCAAAAC	0.740637
AAAGAAAG	CTTTCTTT	0.73965
TTCTTTTG	CAAAAGAA	0.73965
ATTTGCAA	TTGCAAAT	0.739626
GCAAATTT	AAATTTGC	0.739626
CATAACAA	TTGTTATG	0.738887
GTTATGTC	GACATAAC	0.738887
TGCAAATC	GATTTGCA	0.738572
TTTGCAAT	ATTGCAAA	0.738572
AACAAAGA	TCTTTGTT	0.738139
TTTGTTTA	TAAACAAA	0.738139
AGGTCAAA	TTTGACCT	0.736911
TGACCTTT	AAAGGTCA	0.736911
AAAAAAGT	ACTTTTTT	0.736525
TTTTTTTT	AAAAAAAA	0.736525
AAAAAAAC	GTTTTTTT	0.736306
TTTTTTTC	GAAAAAAA	0.736306
CCCACCCG	CGGGTGGG	0.736121
GGTGGGGC	GCCCCACC	0.736121
AGAACAAA	TTTGTTCT	0.736008
TGTTCTGT	ACAGAACA	0.736008
TGCAAATG	CATTTGCA	0.735932
TTTGCAAA	TTTGCAAA	0.735932
TAACAATG	CATTGTTA	0.735706
TTGTTATA	TATAACAA	0.735706
CAAATGTT	AACATTTG	0.735182
CATTTGCA	TGCAAATG	0.735182
TGCTAATA	TATTAGCA	0.734475
TTAGCATC	GATGCTAA	0.734475
AAGGTCAA	TTGACCTT	0.73394
GACCTTCG	CGAAGGTC	0.73394
CCCCACCC	GGGTGGGG	0.733411
GTGGGGAC	GTCCCCAC	0.733411
AAAAAAAG	CTTTTTTT	0.732892
TTTTTTTG	CAAAAAAA	0.732892
TATGCATA	TATGCATA	0.732354
TGCATATC	GATATGCA	0.732354
AAACAAAG	CTTTGTTT	0.732196
TTGTTTTT	AAAAACAA	0.732196
AAAAAAAA	TTTTTTTT	0.732133
TTTTTTTA	TAAAAAAA	0.732133
GGTCAAGT	ACTTGACC	0.73145
TTGACCTT	AAGGTCAA	0.73145
ATTAGCAT	ATGCTAAT	0.731107
GCTAATTT	AAATTAGC	0.731107
ATTAGCAT	ATGCTAAT	0.730456
GCTAATTG	CAATTAGC	0.730456
TTACAATA	TATTGTAA	0.729314
TTGTAATG	CATTACAA	0.729314
AAAAAAGA	TCTTTTTT	0.728075
TTTTTTTT	AAAAAAAA	0.728075
TGCTAATT	AATTAGCA	0.72773
TTAGCATA	TATGCTAA	0.72773
CATATGCA	TGCATATG	0.727683
TAACAAAT	ATTTGTTA	0.727427
TTGTTATG	CATAACAA	0.727427
TGCTAATC	GATTAGCA	0.726772
TTAGCATT	AATGCTAA	0.726772
AAAGAAAA	TTTTCTTT	0.726554
TTCTTTTC	GAAAAGAA	0.726554
ATGAAAAT	ATTTTCAT	0.726125
TTTCATTT	AAATGAAA	0.726125
ATATGCAG	CTGCATAT	0.726093
GCATATGA	TCATATGC	0.726093
GAACAAAG	CTTTGTTC	0.725664
TTGTTCTT	AAGAACAA	0.725664
ATATGCAG	CTGCATAT	0.725587
GCATATTC	GAATATGC	0.725587
TGCAAAAA	TTTTTGCA	0.725256
TTTGCATA	TATGCAAA	0.725256
AAAAAAAT	ATTTTTTT	0.724655
TTTTTTTG	CAAAAAAA	0.724655
TCACAATG	CATTGTGA	0.724403
TTGTGATT	AATCACAA	0.724403
ACCTCCAG	CTGGAGGT	0.723839
GGAGGTCA	TGACCTCC	0.723839
CCCCACCC	GGGTGGGG	0.722827
GTGGGGCG	CGCCCCAC	0.722827
ATATGCAA	TTGCATAT	0.72233
GCATATCC	GGATATGC	0.72233
CATAACAA	TTGTTATG	0.722256
GTTATGCC	GGCATAAC	0.722256
ATATGCAA	TTGCATAT	0.721194
GCATATTG	CAATATGC	0.721194
AACAAAGA	TCTTTGTT	0.721119
TTTGTTTG	CAAACAAA	0.721119
TATGCAGT	ACTGCATA	0.72029
TGCATATG	CATATGCA	0.72029
TAACAAAC	GTTTGTTA	0.718831
TTGTTATG	CATAACAA	0.718831
AAGGTCAA	TTGACCTT	0.7183
GACCTTCT	AGAAGGTC	0.7183
GACCTCCA	TGGAGGTC	0.718058
GAGGTCAC	GTGACCTC	0.718058
CAAATGAA	TTCATTTG	0.717616
CATTTGCA	TGCAAATG	0.717616
TGTAAATC	GATTTACA	0.717584
TTTACATT	AATGTAAA	0.717584
ATGCTAAA	TTTAGCAT	0.717558
TAGCATTC	GAATGCTA	0.717558
ATGCTAAA	TTTAGCAT	0.716959
TAGCATCT	AGATGCTA	0.716959
AACAAAGG	CCTTTGTT	0.716601
TTTGTTTA	TAAACAAA	0.716601
TGCAAAAC	GTTTTGCA	0.71626
TTTGCATT	AATGCAAA	0.71626
TGCAAACA	TGTTTGCA	0.715999
TTTGCATA	TATGCAAA	0.715999
ATTTGCAA	TTGCAAAT	0.715682
GCAAATCC	GGATTTGC	0.715682
AAAAGACC	GGTCTTTT	0.715528
TCTTTTAT	ATAAAAGA	0.715528
GGTGGAGT	ACTCCACC	0.715114
TCCACCCA	TGGGTGGA	0.715114
ATTTGCAA	TTGCAAAT	0.71458
GCAAATGA	TCATTTGC	0.71458
TGCTAAAT	ATTTAGCA	0.714411
TTAGCATT	AATGCTAA	0.714411
AAAAGAAA	TTTCTTTT	0.713493
TCTTTTGG	CCAAAAGA	0.713493
TATGCAAT	ATTGCATA	0.713437
TGCATATT	AATATGCA	0.713437
TGCTAATG	CATTAGCA	0.712996
TTAGCATA	TATGCTAA	0.712996
ATGCTAAA	TTTAGCAT	0.712692
TAGCATCA	TGATGCTA	0.712692
ATATGCAG	CTGCATAT	0.712439
GCATATGG	CCATATGC	0.712439
TATGCAAA	TTTGCATA	0.712307
TGCATACT	AGTATGCA	0.712307
TGCTAAAC	GTTTAGCA	0.712158
TTAGCATC	GATGCTAA	0.712158
AATATGCA	TGCATATT	0.711639
CATATTCA	TGAATATG	0.711639
GGAAACAA	TTGTTTCC	0.711386
GTTTCCTC	GAGGAAAC	0.711386
CATTACAA	TTGTAATG	0.711357
GTAATGTA	TACATTAC	0.711357
TGCAAAAT	ATTTTGCA	0.711165
TTTGCATA	TATGCAAA	0.711165
GAACAAAA	TTTTGTTC	0.711161
TTGTTCTC	GAGAACAA	0.711161
CATAACAT	ATGTTATG	0.711016
GTTATGCA	TGCATAAC	0.711016
TCTGCAGT	ACTGCAGA	0.710965
TGCAGATG	CATCTGCA	0.710965
AATGAAAA	TTTTCATT	0.710964
TTCATTTG	CAAATGAA	0.710964
AATGCTAA	TTAGCATT	0.710519
AGCATTTG	CAAATGCT	0.710519
AACAATGC	GCATTGTT	0.710296
ATTGTTAT	ATAACAAT	0.710296
TCACAATT	AATTGTGA	0.709898
TTGTGATG	CATCACAA	0.709898
AACAAAGC	GCTTTGTT	0.709484
TTTGTTTA	TAAACAAA	0.709484
ATTTGCAA	TTGCAAAT	0.709317
GCAAATGG	CCATTTGC	0.709317
TATGCAAG	CTTGCATA	0.708229
TGCATATG	CATATGCA	0.708229
ATGCAAAC	GTTTGCAT	0.708173
TTGCATAG	CTATGCAA	0.708173
AAAAGAAA	TTTCTTTT	0.707109
TCTTTTCT	AGAAAAGA	0.707109
AAGAAAAT	ATTTTCTT	0.706986
TTTCTTTT	AAAAGAAA	0.706986
CAAATGTA	TACATTTG	0.70589
CATTTGCA	TGCAAATG	0.70589
AATGCAAA	TTTGCATT	0.705406
TGCATTTG	CAAATGCA	0.705406
ATGCTAAT	ATTAGCAT	0.705291
TAGCATCC	GGATGCTA	0.705291
TATGCATC	GATGCATA	0.705219
TGCATATG	CATATGCA	0.705219
TGCTAAAA	TTTTAGCA	0.705138
TTAGCATT	AATGCTAA	0.705138
CCCCACCC	GGGTGGGG	0.704092
GTGGGGCA	TGCCCCAC	0.704092
TATGCAGA	TCTGCATA	0.703144
TGCATATC	GATATGCA	0.703144
TATGCAAA	TTTGCATA	0.703017
TGCATACG	CGTATGCA	0.703017
ATATGCAT	ATGCATAT	0.702558
GCATATCC	GGATATGC	0.702558
ATATGCAT	ATGCATAT	0.701349
GCATATTG	CAATATGC	0.701349
ATATGCAA	TTGCATAT	0.700295
GCATATCT	AGATATGC	0.700295
AGAACAAA	TTTGTTCT	0.699903
TGTTCTTT	AAAGAACA	0.699903
TATGCATG	CATGCATA	0.699801
TGCATATG	CATATGCA	0.699801
AAAAAAAC	GTTTTTTT	0.69979
TTTTTTTG	CAAAAAAA	0.69979
AACAAAGG	CCTTTGTT	0.699581
TTTGTTTG	CAAACAAA	0.699581
AATGCAAA	TTTGCATT	0.699447
TGCATTTA	TAAATGCA	0.699447
TATGCACA	TGTGCATA	0.69905
TGCATATT	AATATGCA	0.69905
TCTGCAGA	TCTGCAGA	0.69862
TGCAGATG	CATCTGCA	0.69862
GAACAAAA	TTTTGTTC	0.697966
TTGTTCTG	CAGAACAA	0.697966
ATTAGCAT	ATGCTAAT	0.69747
GCTAATTA	TAATTAGC	0.69747
AACAAATC	GATTTGTT	0.697013
TTTGTTTT	AAAACAAA	0.697013
AACAAACA	TGTTTGTT	0.696753
TTTGTTTT	AAAACAAA	0.696753
AACAAAGA	TCTTTGTT	0.696535
TTTGTTAT	ATAACAAA	0.696535
ATTTGCAA	TTGCAAAT	0.696251
GCAAATCG	CGATTTGC	0.696251
CATCACAA	TTGTGATG	0.696089
GTGATGCT	AGCATCAC	0.696089
GAACAAAC	GTTTGTTC	0.695221
TTGTTCTC	GAGAACAA	0.695221
TGCAAATT	AATTTGCA	0.695113
TTTGCAAT	ATTGCAAA	0.695113
ACAATGGC	GCCATTGT	0.694577
CATTGTTA	TAACAATG	0.694577
AAAAAAAG	CTTTTTTT	0.694237
TTTTTTTA	TAAAAAAA	0.694237
CAAAAGAA	TTCTTTTG	0.693794
CTTTTGTA	TACAAAAG	0.693794
TGTAAATG	CATTTACA	0.693702
TTTACATC	GATGTAAA	0.693702
AAAAAAGG	CCTTTTTT	0.693581
TTTTTTTT	AAAAAAAA	0.693581
TGCTAAAG	CTTTAGCA	0.69358
TTAGCATT	AATGCTAA	0.69358
CATAACAA	TTGTTATG	0.693177
GTTATGTG	CACATAAC	0.693177
ATTTGCAG	CTGCAAAT	0.693019
GCAAATGT	ACATTTGC	0.693019
CCCACCCT	AGGGTGGG	0.692994
GGTGGGGC	GCCCCACC	0.692994
GGTCAATA	TATTGACC	0.692772
TTGACCTT	AAGGTCAA	0.692772
AAAGAAAA	TTTTCTTT	0.692652
TTCTTTTT	AAAAAGAA	0.692652
AACAAAGC	GCTTTGTT	0.692464
TTTGTTTG	CAAACAAA	0.692464
TTACAATT	AATTGTAA	0.692441
TTGTAATG	CATTACAA	0.692441
AAAAAAAA	TTTTTTTT	0.692411
TTTTTTCT	AGAAAAAA	0.692411
ACAAAGAA	TTCTTTGT	0.691955
CTTTGTTT	AAACAAAG	0.691955
ATAACAAA	TTTGTTAT	0.691895
TGTTATGG	CCATAACA	0.691895
AAAGAAAA	TTTTCTTT	0.691809
TTCTTTTA	TAAAAGAA	0.691809
GCATTACA	TGTAATGC	0.69146
TAATGCAT	ATGCATTA	0.69146
TATGCAAA	TTTGCATA	0.690203
TGCATACA	TGTATGCA	0.690203
ATGTAAAT	ATTTACAT	0.689575
TTACATTT	AAATGTAA	0.689575
AAAAGAAC	GTTCTTTT	0.689514
TCTTTTGT	ACAAAAGA	0.689514
AAAACAAA	TTTGTTTT	0.689181
TGTTTTGG	CCAAAACA	0.689181
AGGTCAAG	CTTGACCT	0.688418
TGACCTTA	TAAGGTCA	0.688418
ATATGCAC	GTGCATAT	0.688092
GCATATGC	GCATATGC	0.688092
TGCAAATC	GATTTGCA	0.688002
TTTGCAAA	TTTGCAAA	0.688002
TAACAATG	CATTGTTA	0.687435
TTGTTATC	GATAACAA	0.687435
AGAACAAT	ATTGTTCT	0.686909
TGTTCTCT	AGAGAACA	0.686909
TATGCAGC	GCTGCATA	0.686713
TGCATATG	CATATGCA	0.686713
CATTACAA	TTGTAATG	0.686248
GTAATGCG	CGCATTAC	0.686248
AAACAAAT	ATTTGTTT	0.686094
TTGTTTTC	GAAAACAA	0.686094
AAAAAAAT	ATTTTTTT	0.686
TTTTTTTA	TAAAAAAA	0.686
ATGCTAAG	CTTAGCAT	0.68508
TAGCATTT	AAATGCTA	0.68508
TGTAAATC	GATTTACA	0.684584
TTTACATA	TATGTAAA	0.684584
AATGCTAA	TTAGCATT	0.683098
AGCATTTA	TAAATGCT	0.683098
CAAATGTG	CACATTTG	0.683016
CATTTGCA	TGCAAATG	0.683016
TATTCAAA	TTTGAATA	0.683007
TGAATAAC	GTTATTCA	0.683007
ATTTGCAA	TTGCAAAT	0.682918
GCAAATCA	TGATTTGC	0.682918
ATCACAAG	CTTGTGAT	0.682353
TGTGATGC	GCATCACA	0.682353
GAACAAAC	GTTTGTTC	0.682026
TTGTTCTG	CAGAACAA	0.682026
AGAACAAA	TTTGTTCT	0.681039
TGTTCTCA	TGAGAACA	0.681039
ATATGCAT	ATGCATAT	0.68045
GCATATCT	AGATATGC	0.68045
AAAAAATA	TATTTTTT	0.680385
TTTTTTTT	AAAAAAAA	0.680385
ATATGCAA	TTGCATAT	0.680307
GCATATTA	TAATATGC	0.680307
ATTTACAT	ATGTAAAT	0.678859
GTAAATGG	CCATTTAC	0.678859
ATTACAAC	GTTGTAAT	0.678813
TGTAATGT	ACATTACA	0.678813
ATGCTAAT	ATTAGCAT	0.678627
TAGCATTG	CAATGCTA	0.678627
ATTACAAG	CTTGTAAT	0.678461
TGTAATGT	ACATTACA	0.678461
ATTACAAA	TTTGTAAT	0.678452
TGTAATGT	ACATTACA	0.678452
CAAATCTG	CAGATTTG	0.678329
GATTTGCA	TGCAAATC	0.678329
AACAAATA	TATTTGTT	0.677705
TTTGTTTT	AAAACAAA	0.677705
ACAAAGAG	CTCTTTGT	0.676982
CTTTGTTC	GAACAAAG	0.676982
CTTTTATA	TATAAAAG	0.676848
TAAAAGAC	GTCTTTTA	0.676848
ATTTGCAC	GTGCAAAT	0.676736
GCAAATGT	ACATTTGC	0.676736
AAAAAACA	TGTTTTTT	0.675315
TTTTTTTT	AAAAAAAA	0.675315
TGTAAATA	TATTTACA	0.675087
TTTACATT	AATGTAAA	0.675087
ATTACAAT	ATTGTAAT	0.675039
TGTAATGA	TCATTACA	0.675039
AACAAAGG	CCTTTGTT	0.674997
TTTGTTAT	ATAACAAA	0.674997
ATTGTGAT	ATCACAAT	0.674846
CACAATGA	TCATTGTG	0.674846
CTCCACCC	GGGTGGAG	0.67358
GTGGAGCC	GGCTCCAC	0.67358
TTACAATC	GATTGTAA	0.673144
TTGTAATG	CATTACAA	0.673144
AAAGGAAG	CTTCCTTT	0.673071
TCCTTTCC	GGAAAGGA	0.673071
TGCAAATG	CATTTGCA	0.673032
TTTGCAGA	TCTGCAAA	0.673032
ACAAAGAG	CTCTTTGT	0.672987
CTTTGTTA	TAACAAAG	0.672987
ATGTAAAT	ATTTACAT	0.67265
TTACATAA	TTATGTAA	0.67265
TCACAATC	GATTGTGA	0.672415
TTGTGATG	CATCACAA	0.672415
AGAACAAA	TTTGTTCT	0.672253
TGTTCTCC	GGAGAACA	0.672253
TCTGCAGT	ACTGCAGA	0.672154
TGCAGATT	AATCTGCA	0.672154
ATCACAAC	GTTGTGAT	0.670767
TGTGATGC	GCATCACA	0.670767
AGGTCAAG	CTTGACCT	0.670395
TGACCTCC	GGAGGTCA	0.670395
ATTTACAT	ATGTAAAT	0.669061
GTAAATGT	ACATTTAC	0.669061
CAAATGCT	AGCATTTG	0.668654
CATTTGCA	TGCAAATG	0.668654
TGCTAATC	GATTAGCA	0.668168
TTAGCATC	GATGCTAA	0.668168
GGAAACAA	TTGTTTCC	0.668141
GTTTCCTG	CAGGAAAC	0.668141
AACAAAGC	GCTTTGTT	0.66788
TTTGTTAT	ATAACAAA	0.66788
CAAAAGAA	TTCTTTTG	0.667835
CTTTTGTT	AACAAAAG	0.667835
AAGAAAAG	CTTTTCTT	0.667593
TTTCTTTT	AAAAGAAA	0.667593
ATAACAAT	ATTGTTAT	0.667368
TGTTATTC	GAATAACA	0.667368
AAACAAAT	ATTTGTTT	0.667088
TTGTTTTA	TAAAACAA	0.667088
CCCCACCC	GGGTGGGG	0.666917
GTGGGGAG	CTCCCCAC	0.666917
ATGCAAAG	CTTTGCAT	0.666565
TTGCATAC	GTATGCAA	0.666565
AAAGAACA	TGTTCTTT	0.666218
TTCTTTTG	CAAAAGAA	0.666218
ACAATGGG	CCCATTGT	0.665349
CATTGTTA	TAACAATG	0.665349
AGGTCAAT	ATTGACCT	0.665335
TGACCTTA	TAAGGTCA	0.665335
AGAACAAA	TTTGTTCT	0.665067
TGTTCTCG	CGAGAACA	0.665067
CCACCCAG	CTGGGTGG	0.664908
GGGTGGAG	CTCCACCC	0.664908
TCTGCAGA	TCTGCAGA	0.664884
TGCAGATT	AATCTGCA	0.664884
TGCAAACT	AGTTTGCA	0.664874
TTTGCATA	TATGCAAA	0.664874
AAGAAAAA	TTTTTCTT	0.664249
TTTCTTTT	AAAAGAAA	0.664249
TATGCAAC	GTTGCATA	0.663652
TGCATATC	GATATGCA	0.663652
GGTCAAGC	GCTTGACC	0.663435
TTGACCTT	AAGGTCAA	0.663435
AATTTGCA	TGCAAATT	0.663216
CAAATTTA	TAAATTTG	0.663216
CTGCAGAT	ATCTGCAG	0.662706
CTGCAGTT	AACTGCAG	0.662706
GGTCAATT	AATTGACC	0.662426
TTGACCTT	AAGGTCAA	0.662426
AAACAAAC	GTTTGTTT	0.662318
TTGTTTTC	GAAAACAA	0.662318
GCATAACA	TGTTATGC	0.661894
TTATGCAC	GTGCATAA	0.661894
ATTTGCAG	CTGCAAAT	0.661889
GCAAATCT	AGATTTGC	0.661889
AAATGAAA	TTTCATTT	0.661841
TCATTTGA	TCAAATGA	0.661841
GCAAAACA	TGTTTTGC	0.661702
TTTTGCAT	ATGCAAAA	0.661702
ATGTAAAT	ATTTACAT	0.661427
TTACATTG	CAATGTAA	0.661427
AGGGTGTG	CACACCCT	0.661401
CACCCTGG	CCAGGGTG	0.661401
AAAAAAAC	GTTTTTTT	0.661136
TTTTTTTA	TAAAAAAA	0.661136
CCCACCCC	GGGGTGGG	0.66072
GGTGGGGC	GCCCCACC	0.66072
ATATGCAT	ATGCATAT	0.660462
GCATATTA	TAATATGC	0.660462
TATGCATT	AATGCATA	0.660411
TGCATATC	GATATGCA	0.660411
AGAACAAT	ATTGTTCT	0.660017
TGTTCTGT	ACAGAACA	0.660017
CATAACAC	GTGTTATG	0.66001
GTTATGCA	TGCATAAC	0.66001
AATGAATA	TATTCATT	0.659989
TTCATTTG	CAAATGAA	0.659989
ATGCAGAT	ATCTGCAT	0.659791
CTGCATAT	ATATGCAG	0.659791
TGTAAATG	CATTTACA	0.659625
TTTACATG	CATGTAAA	0.659625
CAAAAGAA	TTCTTTTG	0.659322
CTTTTGCA	TGCAAAAG	0.659322
TATGCACT	AGTGCATA	0.658434
TGCATATG	CATATGCA	0.658434
TATGCAGT	ACTGCATA	0.657735
TGCATATT	AATATGCA	0.657735
AAGGTCAA	TTGACCTT	0.657623
GACCTTGA	TCAAGGTC	0.657623
ATTAGCAT	ATGCTAAT	0.65743
GCTAATTC	GAATTAGC	0.65743
ATCACAAT	ATTGTGAT	0.656855
TGTGATGT	ACATCACA	0.656855
AAAAAAAA	TTTTTTTT	0.656525
TTTTTTCC	GGAAAAAA	0.656525
TCACAATG	CATTGTGA	0.656003
TTGTGATA	TATCACAA	0.656003
TGCTAAAT	ATTTAGCA	0.655808
TTAGCATC	GATGCTAA	0.655808
GAACAAAT	ATTTGTTC	0.655612
TTGTTCTC	GAGAACAA	0.655612
AGGTCAAG	CTTGACCT	0.655516
TGACCTTG	CAAGGTCA	0.655516
CCCACCCG	CGGGTGGG	0.655459
GGTGGGGA	TCCCCACC	0.655459
ATATGCAG	CTGCATAT	0.654841
GCATATCC	GGATATGC	0.654841
CCTTTCCC	GGGAAAGG	0.654758
GAAAGGAA	TTCCTTTC	0.654758
CAAATCTA	TAGATTTG	0.654568
GATTTGCA	TGCAAATC	0.654568
TGCAAAAG	CTTTTGCA	0.654558
TTTGCATT	AATGCAAA	0.654558
ATTAGCAT	ATGCTAAT	0.654377
GCTAATGT	ACATTAGC	0.654377
CCCGCCCA	TGGGCGGG	0.654346
GGCGGGGC	GCCCCGCC	0.654346
AAAAGACA	TGTCTTTT	0.65381
TCTTTTAT	ATAAAAGA	0.65381
ATATGCAG	CTGCATAT	0.653455
GCATATTG	CAATATGC	0.653455
ATTCAAAT	ATTTGAAT	0.653392
TTGAATAA	TTATTCAA	0.653392
GCATTACA	TGTAATGC	0.65333
TAATGCAA	TTGCATTA	0.65333
AAAGGAAC	GTTCCTTT	0.652818
TCCTTTCC	GGAAAGGA	0.652818
AAAAGAAT	ATTCTTTT	0.652614
TCTTTTGT	ACAAAAGA	0.652614
AGAACAAA	TTTGTTCT	0.652604
TGTTCTTA	TAAGAACA	0.652604
TGCAAAGG	CCTTTGCA	0.652577
TTTGCATA	TATGCAAA	0.652577
GGTGGAGC	GCTCCACC	0.651908
TCCACCCC	GGGGTGGA	0.651908
ATAACAAT	ATTGTTAT	0.651876
TGTTATTT	AAATAACA	0.651876
GAACAAAA	TTTTGTTC	0.651418
TTGTTCTT	AAGAACAA	0.651418
CCCCACCC	GGGTGGGG	0.65135
GTGGGGAT	ATCCCCAC	0.65135
GGTGGAGG	CCTCCACC	0.651109
TCCACCCA	TGGGTGGA	0.651109
CAAAGAGC	GCTCTTTG	0.65075
TCTTTGTT	AACAAAGA	0.65075
TATGCAAC	GTTGCATA	0.650544
TGCATAAC	GTTATGCA	0.650544
AACAATGT	ACATTGTT	0.650324
ATTGTTAT	ATAACAAT	0.650324
TGCAAATT	AATTTGCA	0.650226
TTTGCAAA	TTTGCAAA	0.650226
AAAAGAAG	CTTCTTTT	0.65018
TCTTTTGT	ACAAAAGA	0.65018
ATGTAAAT	ATTTACAT	0.649858
TTACATTA	TAATGTAA	0.649858
AAAAAAAA	TTTTTTTT	0.649335
TTTTTTAT	ATAAAAAA	0.649335
ATGAAAAT	ATTTTCAT	0.64898
TTTCATTC	GAATGAAA	0.64898
ATTAGCAT	ATGCTAAT	0.648813
GCTAATGA	TCATTAGC	0.648813
TATGCAGG	CCTGCATA	0.648775
TGCATATG	CATATGCA	0.648775
ACCCTGCC	GGCAGGGT	0.648563
CAGGGTGT	ACACCCTG	0.648563
TATTCAAA	TTTGAATA	0.648247
TGAATATG	CATATTCA	0.648247
GGTCAAAT	ATTTGACC	0.647993
TTGACCTC	GAGGTCAA	0.647993
AAAAGAAC	GTTCTTTT	0.647451
TCTTTTGA	TCAAAAGA	0.647451
AGGTCAAT	ATTGACCT	0.647312
TGACCTCC	GGAGGTCA	0.647312
TGCTAAAA	TTTTAGCA	0.646535
TTAGCATC	GATGCTAA	0.646535
ATGCATAT	ATATGCAT	0.645803
GGAAACAA	TTGTTTCC	0.645719
GTTTCCTT	AAGGAAAC	0.645719
TATGCAAG	CTTGCATA	0.645675
TGCATATT	AATATGCA	0.645675
TGCAAATG	CATTTGCA	0.645637
TTTGCAAG	CTTGCAAA	0.645637
ATTTGCAC	GTGCAAAT	0.645605
GCAAATCT	AGATTTGC	0.645605
ATGCTAAA	TTTAGCAT	0.645551
TAGCATCC	GGATGCTA	0.645551
ACCTCTGC	GCAGAGGT	0.643873
AGAGGTGA	TCACCTCT	0.643873
AAACAAAC	GTTTGTTT	0.643311
TTGTTTTA	TAAAACAA	0.643311
TATTCAAA	TTTGAATA	0.643003
TGAATAAG	CTTATTCA	0.643003
GCATAACA	TGTTATGC	0.642967
TTATGCAG	CTGCATAA	0.642967
TATGCATC	GATGCATA	0.642895
TGCATATT	AATATGCA	0.642895
AATGCAAA	TTTGCATT	0.642467
TGCATTAC	GTAATGCA	0.642467
GAACAAAT	ATTTGTTC	0.642417
TTGTTCTG	CAGAACAA	0.642417
TAACAAAG	CTTTGTTA	0.642034
TTGTTATT	AATAACAA	0.642034
ATATGCAC	GTGCATAT	0.641924
GCATATGT	ACATATGC	0.641924
AAAAAATC	GATTTTTT	0.641791
TTTTTTTT	AAAAAAAA	0.641791
CATAACAG	CTGTTATG	0.64152
GTTATGCA	TGCATAAC	0.64152
ACCCTGGG	CCCAGGGT	0.641337
CAGGGTGT	ACACCCTG	0.641337
CTCCACCC	GGGTGGAG	0.641105
GTGGAGTG	CACTCCAC	0.641105
AATGCTAA	TTAGCATT	0.641049
AGCATTTT	AAAATGCT	0.641049
CATTACAA	TTGTAATG	0.640514
GTAATGTT	AACATTAC	0.640514
TGAAAATG	CATTTTCA	0.640198
TTTTCATT	AATGAAAA	0.640198
ACACCCTG	CAGGGTGT	0.639623
GGGTGTGG	CCACACCC	0.639623
TAACAATA	TATTGTTA	0.639593
TTGTTATT	AATAACAA	0.639593
AAAAGAAC	GTTCTTTT	0.639236
TCTTTTGC	GCAAAAGA	0.639236
ATCACAAT	ATTGTGAT	0.639231
TGTGATGG	CCATCACA	0.639231
AAAAAAAA	TTTTTTTT	0.638584
TTTTTTCG	CGAAAAAA	0.638584
TATTCATT	AATGAATA	0.638547
TGAATAAC	GTTATTCA	0.638547
TGCAAAGC	GCTTTGCA	0.638206
TTTGCATA	TATGCAAA	0.638206
GGTCAAAG	CTTTGACC	0.638106
TTGACCTC	GAGGTCAA	0.638106
TGCAAATG	CATTTGCA	0.638069
TTTGCAAC	GTTGCAAA	0.638069
TGTAAATT	AATTTACA	0.637953
TTTACATT	AATGTAAA	0.637953
TATGCATG	CATGCATA	0.637477
TGCATATT	AATATGCA	0.637477
TGCAAATA	TATTTGCA	0.637447
TTTGCATC	GATGCAAA	0.637447
ATGCATAC	GTATGCAT	0.63742
ATGCATAT	ATATGCAT	0.63742
TGTAAATA	TATTTACA	0.63742
TTTACATA	TATGTAAA	0.63742
CATATGCA	TGCATATG	0.636193
CATATGCT	AGCATATG	0.636193
CCCCGCCC	GGGCGGGG	0.635935
GCGGGGCC	GGCCCCGC	0.635935
GAACAAAC	GTTTGTTC	0.635477
TTGTTCTT	AAGAACAA	0.635477
TGCTAAAG	CTTTAGCA	0.634976
TTAGCATC	GATGCTAA	0.634976
CAAATGCA	TGCATTTG	0.634898
CATTTGCA	TGCAAATG	0.634898
AAAAGAAA	TTTCTTTT	0.634629
TCTTTTTT	AAAAAAGA	0.634629
GCATAACA	TGTTATGC	0.634356
TTATGCAT	ATGCATAA	0.634356
CAAATCTC	GAGATTTG	0.634074
GATTTGCA	TGCAAATC	0.634074
ATATGCAA	TTGCATAT	0.63372
GCATATCA	TGATATGC	0.63372
AACAAAAG	CTTTTGTT	0.633579
TTTGTTTT	AAAACAAA	0.633579
AATGCTAA	TTAGCATT	0.633048
AGCATTAC	GTAATGCT	0.633048
ACCTCCAC	GTGGAGGT	0.6329
GGAGGTCA	TGACCTCC	0.6329
ATATGCAG	CTGCATAT	0.632557
GCATATCT	AGATATGC	0.632557
AGGTCAAT	ATTGACCT	0.632433
TGACCTTG	CAAGGTCA	0.632433
AACAAAAA	TTTTTGTT	0.631887
TTTGTTTT	AAAACAAA	0.631887
GGTCAAAA	TTTTGACC	0.631742
TTGACCTC	GAGGTCAA	0.631742
ATTCAAAC	GTTTGAAT	0.631494
TTGAATAA	TTATTCAA	0.631494
ATATGCAA	TTGCATAT	0.631456
GCATATTT	AAATATGC	0.631456
GAACAAAG	CTTTGTTC	0.631396
TTGTTCTA	TAGAACAA	0.631396
TGCAAACC	GGTTTGCA	0.63098
TTTGCATT	AATGCAAA	0.63098
TATGCAAT	ATTGCATA	0.630727
TGCATATC	GATATGCA	0.630727
AAAAGACT	AGTCTTTT	0.630559
TCTTTTAT	ATAAAAGA	0.630559
TAACAATC	GATTGTTA	0.630287
TTGTTATT	AATAACAA	0.630287
ATTCAGGT	ACCTGAAT	0.629418
CTGAATGA	TCATTCAG	0.629418
GGTGGAGA	TCTCCACC	0.629386
TCCACCCC	GGGGTGGA	0.629386
CATTCAGG	CCTGAATG	0.629159
TGAATGAA	TTCATTCA	0.629159
TATGCAAA	TTTGCATA	0.629038
TGCATAGG	CCTATGCA	0.629038
ATTTGCAG	CTGCAAAT	0.628785
GCAAATGC	GCATTTGC	0.628785
TCTGCATA	TATGCAGA	0.627499
TGCAGATG	CATCTGCA	0.627499
CCCGCCCC	GGGGCGGG	0.627471
GGCGGGGC	GCCCCGCC	0.627471
TATTCATT	AATGAATA	0.627455
TGAATATG	CATATTCA	0.627455
GGAAACAA	TTGTTTCC	0.627404
GTTTCCTA	TAGGAAAC	0.627404
AAAGGAAG	CTTCCTTT	0.627392
TCCTTTCA	TGAAAGGA	0.627392
CATGACAA	TTGTCATG	0.626265
GTCATGCA	TGCATGAC	0.626265
AAGGAAGG	CCTTCCTT	0.625985
TTCCTTTC	GAAAGGAA	0.625985
CAAATGTC	GACATTTG	0.625966
CATTTGCA	TGCAAATG	0.625966
GGAAACAC	GTGTTTCC	0.625898
GTTTCCTC	GAGGAAAC	0.625898
AATGCTAA	TTAGCATT	0.625705
AGCATTTC	GAAATGCT	0.625705
ATCACAAA	TTTGTGAT	0.625537
TGTGATGC	GCATCACA	0.625537
AAAAAATG	CATTTTTT	0.625477
TTTTTTTT	AAAAAAAA	0.625477
AACAAAGT	ACTTTGTT	0.625385
TTTGTTCT	AGAACAAA	0.625385
AAAAGACC	GGTCTTTT	0.625368
TCTTTTCT	AGAAAAGA	0.625368
ATGCTAAT	ATTAGCAT	0.625112
TAGCATCG	CGATGCTA	0.625112
ATTGTGAT	ATCACAAT	0.624666
CACAATGC	GCATTGTG	0.624666
CACCTCTG	CAGAGGTG	0.624609
GAGGTGAA	TTCACCTC	0.624609
TATGCAGC	GCTGCATA	0.624158
TGCATATT	AATATGCA	0.624158
AGAACAAT	ATTGTTCT	0.623913
TGTTCTTT	AAAGAACA	0.623913
AAATGCAA	TTGCATTT	0.623601
GCATTTTC	GAAAATGC	0.623601
AAAGAAAT	ATTTCTTT	0.623577
TTCTTTTC	GAAAAGAA	0.623577
CCCCGCCC	GGGCGGGG	0.623197
GCGGGGCT	AGCCCCGC	0.623197
AAAACAAA	TTTGTTTT	0.623168
TGTTTTCA	TGAAAACA	0.623168
AACAAATG	CATTTGTT	0.623012
TTTGTTTT	AAAACAAA	0.623012
CAAAAGAA	TTCTTTTG	0.622487
CTTTTGCC	GGCAAAAG	0.622487
ATAACAAC	GTTGTTAT	0.622374
TGTTATGA	TCATAACA	0.622374
ATATGCAA	TTGCATAT	0.621999
GCATATCG	CGATATGC	0.621999
ATTAGCAA	TTGCTAAT	0.621581
GCTAATGG	CCATTAGC	0.621581
CCTCCATT	AATGGAGG	0.62116
TGGAGGTC	GACCTCCA	0.62116
ATGCAAAG	CTTTGCAT	0.620455
TTGCATTT	AAATGCAA	0.620455
ATTGTGAT	ATCACAAT	0.620142
CACAATGT	ACATTGTG	0.620142
ATGCTAAG	CTTAGCAT	0.619548
TAGCATTA	TAATGCTA	0.619548
AATGCAAT	ATTGCATT	0.619409
TGCATTTC	GAAATGCA	0.619409
CATTACAA	TTGTAATG	0.619336
GTAATGTC	GACATTAC	0.619336
ATGCTAAA	TTTAGCAT	0.618887
TAGCATTG	CAATGCTA	0.618887
TCACAATG	CATTGTGA	0.618794
TTGTGAAG	CTTCACAA	0.618794
ACCTCCAA	TTGGAGGT	0.618354
GGAGGTCA	TGACCTCC	0.618354
CCTGCAGG	CCTGCAGG	0.618209
TGCAGGCC	GGCCTGCA	0.618209
TCACAATG	CATTGTGA	0.618137
TTGTGATC	GATCACAA	0.618137
TGCAAATC	GATTTGCA	0.617891
TTTGCAGA	TCTGCAAA	0.617891
AGAACAAA	TTTGTTCT	0.617878
TGTTCTGA	TCAGAACA	0.617878
TATGCAAT	ATTGCATA	0.617619
TGCATAAC	GTTATGCA	0.617619
AATGAAAA	TTTTCATT	0.617468
TTCATTTA	TAAATGAA	0.617468
ATATGCAC	GTGCATAT	0.617439
GCATATGA	TCATATGC	0.617439
AGGGTGTG	CACACCCT	0.617015
CACCCTGC	GCAGGGTG	0.617015
ATATGCAC	GTGCATAT	0.616933
GCATATTC	GAATATGC	0.616933
AAGGCCAA	TTGGCCTT	0.616896
GGCCTTCA	TGAAGGCC	0.616896
TATGCACA	TGTGCATA	0.616644
TGCATATC	GATATGCA	0.616644
ATTTGCAG	CTGCAAAT	0.616563
GCAAATTT	AAATTTGC	0.616563
AGGCCAAA	TTTGGCCT	0.616488
TGGCCTTT	AAAGGCCA	0.616488
ATTTACAA	TTGTAAAT	0.616476
GTAAATGA	TCATTTAC	0.616476
TTACAAGG	CCTTGTAA	0.616438
TTGTAATG	CATTACAA	0.616438
AAATGCAA	TTGCATTT	0.616262
GCATTTCC	GGAAATGC	0.616262
CATTCAGG	CCTGAATG	0.616128
TGAATGAC	GTCATTCA	0.616128
CATCACAA	TTGTGATG	0.616075
GTGATGCG	CGCATCAC	0.616075
AACAAATT	AATTTGTT	0.615577
TTTGTTTT	AAAACAAA	0.615577
AAACAAAA	TTTTGTTT	0.615093
TTGTTTTC	GAAAACAA	0.615093
CTGCAGAT	ATCTGCAG	0.615066
CTGCAGTC	GACTGCAG	0.615066
AAAAAAAA	TTTTTTTT	0.614556
TTTTTTCA	TGAAAAAA	0.614556
CATCACAA	TTGTGATG	0.614386
GTGATGCC	GGCATCAC	0.614386
ATATGCAT	ATGCATAT	0.613875
GCATATCA	TGATATGC	0.613875
AAAGAAAC	GTTTCTTT	0.613593
TTCTTTTC	GAAAAGAA	0.613593
ATCACAAT	ATTGTGAT	0.613554
TGTGATGA	TCATCACA	0.613554
ATCTGCAG	CTGCAGAT	0.613488
GCAGATGT	ACATCTGC	0.613488
TGCAAATG	CATTTGCA	0.613258
TTTGCACA	TGTGCAAA	0.613258
ATAAAAGA	TCTTTTAT	0.612958
TTTTATAT	ATATAAAA	0.612958
ATATGCAG	CTGCATAT	0.612568
GCATATTA	TAATATGC	0.612568
ATTTGCAC	GTGCAAAT	0.612561
GCAAATGC	GCATTTGC	0.612561
CCCACCCT	AGGGTGGG	0.612332
GGTGGGGA	TCCCCACC	0.612332
CAAAGAGG	CCTCTTTG	0.612167
TCTTTGTT	AACAAAGA	0.612167
AAAAAACT	AGTTTTTT	0.61196
TTTTTTTT	AAAAAAAA	0.61196
CTCCCCCC	GGGGGGAG	0.61169
GGGGAGGG	CCCTCCCC	0.61169
AAAAAAAA	TTTTTTTT	0.611647
TTTTTTGA	TCAAAAAA	0.611647
ACTGCAGA	TCTGCAGT	0.611629
TGCAGTTT	AAACTGCA	0.611629
ATATGCAT	ATGCATAT	0.611611
GCATATTT	AAATATGC	0.611611
AAATGAAA	TTTCATTT	0.611529
TCATTTGG	CCAAATGA	0.611529
TTCAAATG	CATTTGAA	0.611435
TTTGAATA	TATTCAAA	0.611435
GAAACACC	GGTGTTTC	0.611426
TGTTTCCT	AGGAAACA	0.611426
CAAATCTT	AAGATTTG	0.611389
GATTTGCA	TGCAAATC	0.611389
CCACCCAG	CTGGGTGG	0.611192
GGGTGGGG	CCCCACCC	0.611192
TATGCACC	GGTGCATA	0.61095
TGCATATG	CATATGCA	0.61095
AAAGACCA	TGGTCTTT	0.610886
GTCTTTTA	TAAAAGAC	0.610886
CTCCACCC	GGGTGGAG	0.610803
GTGGAGCT	AGCTCCAC	0.610803
CTTTTATA	TATAAAAG	0.610569
TAAAAGAA	TTCTTTTA	0.610569
AAAAGAAT	ATTCTTTT	0.610551
TCTTTTGA	TCAAAAGA	0.610551
ATTAGCAT	ATGCTAAT	0.61044
GCTAATAG	CTATTAGC	0.61044
GAACAATG	CATTGTTC	0.609971
TTGTTCTC	GAGAACAA	0.609971
AACAAACG	CGTTTGTT	0.609843
TTTGTTTT	AAAACAAA	0.609843
TGTAAATT	AATTTACA	0.609623
TTTACATA	TATGTAAA	0.609623
TATGCATA	TATGCATA	0.60907
TGCATATA	TATATGCA	0.60907
CTTTTATT	AATAAAAG	0.609058
TAAAAGAC	GTCTTTTA	0.609058
CTGCAGAT	ATCTGCAG	0.609051
AAAAAAAG	CTTTTTTT	0.608642
TTTTTTGT	ACAAAAAA	0.608642
CAAATCAA	TTGATTTG	0.608493
GATTTGCA	TGCAAATC	0.608493
GGTCAATC	GATTGACC	0.608345
TTGACCTT	AAGGTCAA	0.608345
CATTCAGG	CCTGAATG	0.608276
TGAATGAG	CTCATTCA	0.608276
AAAAGAAG	CTTCTTTT	0.608116
TCTTTTGA	TCAAAAGA	0.608116
AAAGTCAA	TTGACTTT	0.607621
GACTTTTG	CAAAAGTC	0.607621
AAAAGACG	CGTCTTTT	0.607439
TCTTTTAT	ATAAAAGA	0.607439
CAAAACAT	ATGTTTTG	0.607229
GTTTTGCA	TGCAAAAC	0.607229
TGCAAAAC	GTTTTGCA	0.607145
TTTGCATC	GATGCAAA	0.607145
AAAGGAAC	GTTCCTTT	0.607139
TCCTTTCA	TGAAAGGA	0.607139
AAAAAACC	GGTTTTTT	0.606999
TTTTTTTT	AAAAAAAA	0.606999
AAATGCAA	TTGCATTT	0.606875
GCATTTTG	CAAAATGC	0.606875
AGGTCATT	AATGACCT	0.606531
TGACCTCC	GGAGGTCA	0.606531
AATGCTAA	TTAGCATT	0.606138
AGCATTAA	TTAATGCT	0.606138
AATTTGCA	TGCAAATT	0.606051
CAAATTTG	CAAATTTG	0.606051
AGGTCAAG	CTTGACCT	0.605731
TGACCTTT	AAAGGTCA	0.605731
CACGCCTT	AAGGCGTG	0.605517
GGCGTGGC	GCCACGCC	0.605517
AGAACAAT	ATTGTTCT	0.605048
TGTTCTCA	TGAGAACA	0.605048
AATGAAAA	TTTTCATT	0.605
TTCATTTC	GAAATGAA	0.605
GGAAACAG	CTGTTTCC	0.60462
GTTTCCTC	GAGGAAAC	0.60462
CCCCACCC	GGGTGGGG	0.604584
GTGGGGAA	TTCCCCAC	0.604584
CCCCGCCC	GGGCGGGG	0.604338
GCGGGGCA	TGCCCCGC	0.604338
ATATGCAC	GTGCATAT	0.603785
GCATATGG	CCATATGC	0.603785
AAAACAAA	TTTGTTTT	0.603659
TGTTTTCC	GGAAAACA	0.603659
ATGCAAAA	TTTTGCAT	0.603636
TTGCATTA	TAATGCAA	0.603636
AGGCCAAG	CTTGGCCT	0.603614
TGGCCTTT	AAAGGCCA	0.603614
GCCACAAG	CTTGTGGC	0.6036
TGTGGCTT	AAGCCACA	0.6036
AGAGAATG	CATTCTCT	0.603407
TTCTCTTT	AAAGAGAA	0.603407
AAAGGAAG	CTTCCTTT	0.602996
TCCTTTCT	AGAAAGGA	0.602996
CAAAAGAA	TTCTTTTG	0.602977
CTTTTGTC	GACAAAAG	0.602977
CATTTACA	TGTAAATG	0.602835
TAAATGAA	TTCATTTA	0.602835
GCATTACA	TGTAATGC	0.602452
TAATGCTA	TAGCATTA	0.602452
AAAAGAAT	ATTCTTTT	0.602336
TCTTTTGC	GCAAAAGA	0.602336
ATATGCAT	ATGCATAT	0.602154
GCATATCG	CGATATGC	0.602154
CAATGGCC	GGCCATTG	0.601588
CCATTGTC	GACAATGG	0.601588
ACAAAGCG	CGCTTTGT	0.601534
CTTTGTTT	AAACAAAG	0.601534
AAAAAAGC	GCTTTTTT	0.601082
TTTTTTTT	AAAAAAAA	0.601082
AGGGTGTG	CACACCCT	0.60106
CACCCTGT	ACAGGGTG	0.60106
ATGTAAAT	ATTTACAT	0.600849
TTACATTC	GAATGTAA	0.600849
GAAACAAC	GTTGTTTC	0.600604
TGTTTCCT	AGGAAACA	0.600604
CCACCCAC	GTGGGTGG	0.600406
GGGTGGAG	CTCCACCC	0.600406
ATTTGCAC	GTGCAAAT	0.60028
GCAAATTT	AAATTTGC	0.60028
TTCAAATT	AATTTGAA	0.600253
TTTGAATA	TATTCAAA	0.600253
ACATAACA	TGTTATGT	0.600174
TTATGTAA	TTACATAA	0.600174
ATTCAAAA	TTTTGAAT	0.599987
TTGAATAA	TTATTCAA	0.599987
AAGGAAGT	ACTTCCTT	0.59994
TTCCTTTC	GAAAGGAA	0.59994
AACAAAAA	TTTTTGTT	0.599923
TTTGTTCT	AGAACAAA	0.599923
AAAAGAAG	CTTCTTTT	0.599902
TCTTTTGC	GCAAAAGA	0.599902
TATGCAAA	TTTGCATA	0.599693
TGCATAGT	ACTATGCA	0.599693
AAAAAATT	AATTTTTT	0.599559
TTTTTTTT	AAAAAAAA	0.599559
AAAAAAAT	ATTTTTTT	0.599505
TTTTTTGT	ACAAAAAA	0.599505
AAACAAAG	CTTTGTTT	0.599387
TTGTTTAG	CTAAACAA	0.599387
TAACAACG	CGTTGTTA	0.598984
TTGTTATG	CATAACAA	0.598984
ATGCAAAT	ATTTGCAT	0.598681
TTGCATCG	CGATGCAA	0.598681
TATTCATT	AATGAATA	0.598542
TGAATAAG	CTTATTCA	0.598542
CACCTCTG	CAGAGGTG	0.598384
GAGGTGAT	ATCACCTC	0.598384
GCAGGCCC	GGGCCTGC	0.598169
GCCTGCAG	CTGCAGGC	0.598169
CCTGCAGT	ACTGCAGG	0.598068
TGCAGGCC	GGCCTGCA	0.598068
AGGTCACA	TGTGACCT	0.597828
TGACCTCC	GGAGGTCA	0.597828
TATGCACA	TGTGCATA	0.597801
TGCATAAC	GTTATGCA	0.597801
AGGTCAAA	TTTGACCT	0.597608
TGACCTCA	TGAGGTCA	0.597608
CCTGCAGG	CCTGCAGG	0.597474
TGCAGGCA	TGCCTGCA	0.597474
CTGCAGAT	ATCTGCAG	0.597401
CTGCAGTG	CACTGCAG	0.597401
ATTTACAT	ATGTAAAT	0.597007
GTAAATCA	TGATTTAC	0.597007
TGAAAATT	AATTTTCA	0.596835
TTTTCATT	AATGAAAA	0.596835
GAACAATG	CATTGTTC	0.596776
TTGTTCTG	CAGAACAA	0.596776
TGCTAATT	AATTAGCA	0.596395
TTAGCATG	CATGCTAA	0.596395
AGGCCAAA	TTTGGCCT	0.596357
TGGCCTTC	GAAGGCCA	0.596357
AGAACAAT	ATTGTTCT	0.596263
TGTTCTCC	GGAGAACA	0.596263
AAACAAAA	TTTTGTTT	0.596226
TTGTTTTA	TAAAACAA	0.596226
CTCCACCC	GGGTGGAG	0.596002
GTGGAGCG	CGCTCCAC	0.596002
AAAGGAAA	TTTCCTTT	0.595992
TCCTTTCC	GGAAAGGA	0.595992
AATGCAAT	ATTGCATT	0.595908
TGCATTTT	AAAATGCA	0.595908
AATGAAAA	TTTTCATT	0.595893
TTCATTCA	TGAATGAA	0.595893
ACCCTGCC	GGCAGGGT	0.595882
CAGGGTTT	AAACCCTG	0.595882
TATGCACT	AGTGCATA	0.595879
TGCATATT	AATATGCA	0.595879
GAACAAAT	ATTTGTTC	0.595868
TTGTTCTT	AAGAACAA	0.595868
ATTCAAAT	ATTTGAAT	0.595805
TTGAATAT	ATATTCAA	0.595805
AGAACAAA	TTTGTTCT	0.595551
TGTTCTGC	GCAGAACA	0.595551
AAGGAACT	AGTTCCTT	0.595438
TTCCTTTC	GAAAGGAA	0.595438
CCTCCATC	GATGGAGG	0.59528
TGGAGGTC	GACCTCCA	0.59528
AAAGAAAT	ATTTCTTT	0.595141
TTCTTTTT	AAAAAGAA	0.595141
TGCTAATA	TATTAGCA	0.59509
TTAGCATA	TATGCTAA	0.59509
AGGAAACA	TGTTTCCT	0.59507
TTTCCTCC	GGAGGAAA	0.59507
AACAATGG	CCATTGTT	0.594986
ATTGTTAA	TTAACAAT	0.594986
AAATGAAT	ATTCATTT	0.594742
TCATTTGA	TCAAATGA	0.594742
AAAAGACC	GGTCTTTT	0.594602
TCTTTTGT	ACAAAAGA	0.594602
ATGAATAA	TTATTCAT	0.594403
ATTCATTT	AAATGAAT	0.594403
AAAAAAAA	TTTTTTTT	0.593959
TTTTTTGC	GCAAAAAA	0.593959
ATTAGCAT	ATGCTAAT	0.593945
GCTAATGC	GCATTAGC	0.593945
GGTCAAAT	ATTTGACC	0.593886
TTGACCTG	CAGGTCAA	0.593886
AACAAAAC	GTTTTGTT	0.593525
TTTGTTTT	AAAACAAA	0.593525
TCACAATA	TATTGTGA	0.593042
TTGTGATT	AATCACAA	0.593042
CCTCCAGG	CCTGGAGG	0.592984
TGGAGGTC	GACCTCCA	0.592984
GGTGGAGT	ACTCCACC	0.592865
TCCACCCC	GGGGTGGA	0.592865
CAATGGCC	GGCCATTG	0.592773
CCATTGTT	AACAATGG	0.592773
AAAGACCA	TGGTCTTT	0.592726
GTCTTTTC	GAAAAGAC	0.592726
ATTTGCAG	CTGCAAAT	0.592619
GCAAATCC	GGATTTGC	0.592619
TGCTAATT	AATTAGCA	0.59261
TTAGCAAT	ATTGCTAA	0.59261
TTCAAATC	GATTTGAA	0.592584
TTTGAATA	TATTCAAA	0.592584
AACAAAAG	CTTTTGTT	0.592409
TTTGTTCT	AGAACAAA	0.592409
AACAAACA	TGTTTGTT	0.592281
TTTGTTCT	AGAACAAA	0.592281
CTCCACCC	GGGTGGAG	0.592238
GTGGAGCA	TGCTCCAC	0.592238
ATTTGCAA	TTGCAAAT	0.592141
GCAAATTA	TAATTTGC	0.592141
CAAAAGAA	TTCTTTTG	0.591952
CTTTTGAA	TTCAAAAG	0.591952
ATAACAAG	CTTGTTAT	0.591735
TGTTATGA	TCATAACA	0.591735
ATTTGCAG	CTGCAAAT	0.591517
GCAAATGA	TCATTTGC	0.591517
AAGGAACA	TGTTCCTT	0.59127
TTCCTTTC	GAAAGGAA	0.59127
ATAACAAT	ATTGTTAT	0.591238
TGTTATTA	TAATAACA	0.591238
CCTTTCCT	AGGAAAGG	0.591161
GAAAGGAA	TTCCTTTC	0.591161
GGTCAATG	CATTGACC	0.591068
TTGACCTT	AAGGTCAA	0.591068
AAAGAAAG	CTTTCTTT	0.591009
TTCTTTTC	GAAAAGAA	0.591009
GCTAAATA	TATTTAGC	0.590987
TTTAGCAT	ATGCTAAA	0.590987
ATTTACAA	TTGTAAAT	0.590932
GTAAATGC	GCATTTAC	0.590932
ATGCATAT	ATATGCAT	0.590911
ATGCATTA	TAATGCAT	0.590911
AAAACAAA	TTTGTTTT	0.590884
TGTTTTAC	GTAAAACA	0.590884
AAGAGAAT	ATTCTCTT	0.590619
TCTCTTGA	TCAAGAGA	0.590619
CAAATGAG	CTCATTTG	0.590544
CATTTGCA	TGCAAATG	0.590544
CAAAAGAA	TTCTTTTG	0.590527
CTTTTGTG	CACAAAAG	0.590527
TGCAAATC	GATTTGCA	0.590496
TTTGCAAG	CTTGCAAA	0.590496
TCTGCAGA	TCTGCAGA	0.590133
TGCAGATC	GATCTGCA	0.590133
AGAGAATG	CATTCTCT	0.590066
TTCTCTTG	CAAGAGAA	0.590066
CAAAACAA	TTGTTTTG	0.589826
GTTTTGCT	AGCAAAAC	0.589826
AGAACAAT	ATTGTTCT	0.589077
TGTTCTCG	CGAGAACA	0.589077
AAAGAGCA	TGCTCTTT	0.588915
CTCTTTGT	ACAAAGAG	0.588915
TCTGCATA	TATGCAGA	0.588688
TGCAGATT	AATCTGCA	0.588688
AAAGAAAT	ATTTCTTT	0.588575
TTCTTTTA	TAAAAGAA	0.588575
AAAAGAAA	TTTCTTTT	0.588199
TCTTTTTG	CAAAAAGA	0.588199
ATTCAAAG	CTTTGAAT	0.587378
TTGAATAA	TTATTCAA	0.587378
AAAAAACG	CGTTTTTT	0.587363
TTTTTTTT	AAAAAAAA	0.587363
AAAAGTCC	GGACTTTT	0.586943
ACTTTTGT	ACAAAAGT	0.586943
GAAACAAG	CTTGTTTC	0.586639
TGTTTCCT	AGGAAACA	0.586639
TATGCAAA	TTTGCATA	0.586561
TGCATAGA	TCTATGCA	0.586561
AGGTCAAA	TTTGACCT	0.586419
TGACCTGC	GCAGGTCA	0.586419
AACAAAGT	ACTTTGTT	0.586401
TTTGTTTA	TAAACAAA	0.586401
ATAACAAA	TTTGTTAT	0.586306
TGTTATTC	GAATAACA	0.586306
ATTTGCAG	CTGCAAAT	0.586254
GCAAATGG	CCATTTGC	0.586254
TATGCAGG	CCTGCATA	0.58622
TGCATATT	AATATGCA	0.58622
TCTGCAGT	ACTGCAGA	0.586156
TGCAGATC	GATCTGCA	0.586156
ATTTGCAA	TTGCAAAT	0.585786
GCAAATTG	CAATTTGC	0.585786
ATAACAAT	ATTGTTAT	0.585642
TGTTATTG	CAATAACA	0.585642
AGGAAACA	TGTTTCCT	0.585525
TTTCCTGA	TCAGGAAA	0.585525
AAAGAAAC	GTTTCTTT	0.58523
TTCTTTTT	AAAAAGAA	0.58523
AAAGGAAG	CTTCCTTT	0.585197
TCCTTTCG	CGAAAGGA	0.585197
AAAACAAA	TTTGTTTT	0.585049
TGTTTTAT	ATAAAACA	0.585049
AGTCAAGA	TCTTGACT	0.584435
TTGACTTT	AAAGTCAA	0.584435
AAACAAAG	CTTTGTTT	0.584286
TTGTTTGT	ACAAACAA	0.584286
AAAGGAAG	CTTCCTTT	0.584269
TCCTTTTG	CAAAAGGA	0.584269
CATATGAA	TTCATATG	0.584248
CATATGCA	TGCATATG	0.584248
TTACAAGT	ACTTGTAA	0.58409
TTGTAATG	CATTACAA	0.58409
CCCTGCCC	GGGCAGGG	0.584031
GCAGGGTT	AACCCTGC	0.584031
AGGTCATA	TATGACCT	0.584013
TGACCTCC	GGAGGTCA	0.584013
GGTCAAAG	CTTTGACC	0.583999
TTGACCTG	CAGGTCAA	0.583999
CAAATGAC	GTCATTTG	0.583899
CATTTGCA	TGCAAATG	0.583899
AGGCCAAG	CTTGGCCT	0.583483
TGGCCTTC	GAAGGCCA	0.583483
AAAAGAAC	GTTCTTTT	0.583232
TCTTTTAT	ATAAAAGA	0.583232
TGCAAATC	GATTTGCA	0.582928
TTTGCAAC	GTTGCAAA	0.582928
ATTACAAT	ATTGTAAT	0.582892
TGTAATGG	CCATTACA	0.582892
AAAGGAAC	GTTCCTTT	0.582743
TCCTTTCT	AGAAAGGA	0.582743
CCACCCAA	TTGGGTGG	0.582724
GGGTGGAG	CTCCACCC	0.582724
GGAAACAC	GTGTTTCC	0.582653
GTTTCCTG	CAGGAAAC	0.582653
AGGTCAAT	ATTGACCT	0.582648
TGACCTTT	AAAGGTCA	0.582648
CATAACAT	ATGTTATG	0.582017
GTTATGTA	TACATAAC	0.582017
TGCTAATG	CATTAGCA	0.58166
TTAGCATG	CATGCTAA	0.58166
TAACAAAA	TTTTGTTA	0.581069
TTGTTATT	AATAACAA	0.581069
AAGTCAAG	CTTGACTT	0.580833
TGACTTTC	GAAAGTCA	0.580833
TAACAATG	CATTGTTA	0.580735
TTGTTAAG	CTTAACAA	0.580735
CCCACCCC	GGGGTGGG	0.580649
GGTGGGGA	TCCCCACC	0.580649
TGCACATG	CATGTGCA	0.580607
TGTGCATA	TATGCACA	0.580607
GCATAACG	CGTTATGC	0.580538
TTATGCAA	TTGCATAA	0.580538
AAAAAAGA	TCTTTTTT	0.580514
TTTTTTTC	GAAAAAAA	0.580514
TTCAAACC	GGTTTGAA	0.58049
TTTGAATA	TATTCAAA	0.58049
AATGAAAA	TTTTCATT	0.580346
TTCATTTT	AAAATGAA	0.580346
ATGCAAAG	CTTTGCAT	0.580303
TTGCATAG	CTATGCAA	0.580303
ATCTGCAG	CTGCAGAT	0.580214
GCAGATTT	AAATCTGC	0.580214
TAACAAGG	CCTTGTTA	0.579806
TTGTTATG	CATAACAA	0.579806
TGAAAATG	CATTTTCA	0.579651
TTTTCATA	TATGAAAA	0.579651
CATAACAA	TTGTTATG	0.57898
GTTATGAC	GTCATAAC	0.57898
GAATGAAA	TTTCATTC	0.578653
TCATTCAG	CTGAATGA	0.578653
AAAGAAAC	GTTTCTTT	0.578591
TTCTTTTA	TAAAAGAA	0.578591
ACACCCTG	CAGGGTGT	0.57855
GGGTGTGA	TCACACCC	0.57855
CTGCAGGC	GCCTGCAG	0.578403
CTGCAGTT	AACTGCAG	0.578403
AGGTCAAA	TTTGACCT	0.578378
TGACCTGA	TCAGGTCA	0.578378
GGTGGAGC	GCTCCACC	0.57826
TCCACCCT	AGGGTGGA	0.57826
ACCCTGCC	GGCAGGGT	0.578131
CAGGGTTC	GAACCCTG	0.578131
AGGTCATG	CATGACCT	0.578033
TGACCTCC	GGAGGTCA	0.578033
AATGAAAG	CTTTCATT	0.578018
TTCATTTG	CAAATGAA	0.578018
TGCTAATG	CATTAGCA	0.577875
TTAGCAAT	ATTGCTAA	0.577875
GGTCAAAA	TTTTGACC	0.577635
TTGACCTG	CAGGTCAA	0.577635
TTACAAAT	ATTTGTAA	0.577418
TTGTAATG	CATTACAA	0.577418
AGAACAAC	GTTGTTCT	0.577369
TGTTCTCT	AGAGAACA	0.577369
TGCAAATG	CATTTGCA	0.577247
TTTGCAGT	ACTGCAAA	0.577247
AGAACAAT	ATTGTTCT	0.576613
TGTTCTTA	TAAGAACA	0.576613
CCCTGCCA	TGGCAGGG	0.576398
GCAGGGTT	AACCCTGC	0.576398
AAAGGAAT	ATTCCTTT	0.576377
TCCTTTCC	GGAAAGGA	0.576377
ATTACAAC	GTTGTAAT	0.576336
TGTAATGA	TCATTACA	0.576336
ATTTGCAC	GTGCAAAT	0.576335
GCAAATCC	GGATTTGC	0.576335
CAAAAGTC	GACTTTTG	0.576237
CTTTTGTA	TACAAAAG	0.576237
TGAAAATC	GATTTTCA	0.576072
TTTTCATT	AATGAAAA	0.576072
ATTACAAG	CTTGTAAT	0.575984
TGTAATGA	TCATTACA	0.575984
ATTACAAA	TTTGTAAT	0.575975
TGTAATGA	TCATTACA	0.575975
GAAACAGC	GCTGTTTC	0.575736
TGTTTCCT	AGGAAACA	0.575736
AACAAACC	GGTTTGTT	0.575657
TTTGTTTT	AAAACAAA	0.575657
CCTGCCCC	GGGGCAGG	0.575391
GGCAGGGT	ACCCTGCC	0.575391
ATTTGCAC	GTGCAAAT	0.575233
GCAAATGA	TCATTTGC	0.575233
TATGCAGT	ACTGCATA	0.575025
TGCATATC	GATATGCA	0.575025
ATTTACAT	ATGTAAAT	0.57481
GTAAATCT	AGATTTAC	0.57481
TTACAACT	AGTTGTAA	0.574675
TTGTAATG	CATTACAA	0.574675
ATGCAAAT	ATTTGCAT	0.574606
TTGCATCC	GGATGCAA	0.574606
AAAAGTCC	GGACTTTT	0.574475
ACTTTTGG	CCAAAAGT	0.574475
TGCAAATT	AATTTGCA	0.574432
TTTGCAGA	TCTGCAAA	0.574432
AAGAAAAC	GTTTTCTT	0.574416
TTTCTTTT	AAAAGAAA	0.574416
AACAAAGA	TCTTTGTT	0.574348
TTTGTTAG	CTAACAAA	0.574348
CCTGCAGT	ACTGCAGG	0.574014
TGCAGGCA	TGCCTGCA	0.574014
TGTAAATG	CATTTACA	0.573981
TTTACAAG	CTTGTAAA	0.573981
ATTCAAAC	GTTTGAAT	0.573694
TTGAATAT	ATATTCAA	0.573694
ACCTCCAT	ATGGAGGT	0.573512
GGAGGTCG	CGACCTCC	0.573512
AAACAAAT	ATTTGTTT	0.573358
TTGTTTTT	AAAAACAA	0.573358
ATTTGCAG	CTGCAAAT	0.573189
GCAAATCG	CGATTTGC	0.573189
AAAGAACG	CGTTCTTT	0.573064
TTCTTTTG	CAAAAGAA	0.573064
AAGAGAAA	TTTCTCTT	0.572959
TCTCTTGA	TCAAGAGA	0.572959
CAAATGAA	TTCATTTG	0.572778
CATTTGAA	TTCAAATG	0.572778
TGCTAAAC	GTTTAGCA	0.572772
TTAGCATA	TATGCTAA	0.572772
ATTGTGAT	ATCACAAT	0.572633
CACAATGG	CCATTGTG	0.572633
TTACAAGC	GCTTGTAA	0.572327
TTGTAATG	CATTACAA	0.572327
ACCCTGGG	CCCAGGGT	0.572313
CAGGGTTT	AAACCCTG	0.572313
TGCAAATG	CATTTGCA	0.572271
TTTGCACT	AGTGCAAA	0.572271
CCTTTCCG	CGGAAAGG	0.57206
GAAAGGAA	TTCCTTTC	0.57206
TTACAAGA	TCTTGTAA	0.572055
TTGTAATG	CATTACAA	0.572055
CAAATCAC	GTGATTTG	0.571954
GATTTGCA	TGCAAATC	0.571954
AAAAAAAC	GTTTTTTT	0.571924
TTTTTTGT	ACAAAAAA	0.571924
CAAGAGAA	TTCTCTTG	0.571676
CTCTTGAC	GTCAAGAG	0.571676
AAATGAAA	TTTCATTT	0.57151
TCATTTGC	GCAAATGA	0.57151
CCTCCATA	TATGGAGG	0.571068
TGGAGGTC	GACCTCCA	0.571068
ATAACAAA	TTTGTTAT	0.570814
TGTTATTT	AAATAACA	0.570814
AATGAAAC	GTTTCATT	0.570602
TTCATTTG	CAAATGAA	0.570602
GAATGACA	TGTCATTC	0.570476
TCATTCAG	CTGAATGA	0.570476
AACAAACT	AGTTTGTT	0.570281
TTTGTTTT	AAAACAAA	0.570281
CCCCGCCC	GGGCGGGG	0.57026
GCGGGGCG	CGCCCCGC	0.57026
ATTTGCAC	GTGCAAAT	0.569971
GCAAATGG	CCATTTGC	0.569971
CATATGCA	TGCATATG	0.5699
CATATGCG	CGCATATG	0.5699
CAAAAGTC	GACTTTTG	0.569753
CTTTTGGC	GCCAAAAG	0.569753
ACCTCTGC	GCAGAGGT	0.569732
AGAGGTGG	CCACCTCT	0.569732
CAAGAGAA	TTCTCTTG	0.569729
CTCTTGAA	TTCAAGAG	0.569729
AATGCAAC	GTTGCATT	0.569663
TGCATTTC	GAAATGCA	0.569663
AGAACAAA	TTTGTTCT	0.569475
TGTTCTTC	GAAGAACA	0.569475
AGGTCAAA	TTTGACCT	0.569413
TGACCTCT	AGAGGTCA	0.569413
AACAAAGT	ACTTTGTT	0.569381
TTTGTTTG	CAAACAAA	0.569381
CATAACAA	TTGTTATG	0.569087
GTTATGAA	TTCATAAC	0.569087
AAATGCAA	TTGCATTT	0.568928
GCATTTAC	GTAAATGC	0.568928
CATATCCA	TGGATATG	0.568899
GATATGCA	TGCATATC	0.568899
TTACAACA	TGTTGTAA	0.568418
TTGTAATG	CATTACAA	0.568418
AAGGTCAA	TTGACCTT	0.568316
GACCTTAA	TTAAGGTC	0.568316
ACAAAGGT	ACCTTTGT	0.568274
CTTTGTTT	AAACAAAG	0.568274
AAAAAAAA	TTTTTTTT	0.56816
TTTTTTGG	CCAAAAAA	0.56816
CAAAAAAA	TTTTTTTG	0.567783
TTTTTGTC	GACAAAAA	0.567783
ACAAAGCA	TGCTTTGT	0.567658
CTTTGTTT	AAACAAAG	0.567658
CTGCAGAC	GTCTGCAG	0.567626
CTGCAGAT	ATCTGCAG	0.567626
ATTTGCAA	TTGCAAAT	0.567549
GCAAATTC	GAATTTGC	0.567549
AAAGACCA	TGGTCTTT	0.567321
GTCTTTTG	CAAAAGAC	0.567321
ACAAAGAA	TTCTTTGT	0.566754
CTTTGTTC	GAACAAAG	0.566754
AAATGCAA	TTGCATTT	0.566698
GCATTTAG	CTAAATGC	0.566698
GAACAATC	GATTGTTC	0.566511
TTGTTCTC	GAGAACAA	0.566511
AATGAATA	TATTCATT	0.566493
TTCATTTA	TAAATGAA	0.566493
CCCTGCCC	GGGCAGGG	0.5663
GCAGGGTC	GACCCTGC	0.5663
AAGTCAAG	CTTGACTT	0.566034
TGACTTTT	AAAAGTCA	0.566034
ATGCAAAC	GTTTGCAT	0.566032
TTGCATTA	TAATGCAA	0.566032
ACCCTGCT	AGCAGGGT	0.566031
CAGGGTGT	ACACCCTG	0.566031
ATTAGCAA	TTGCTAAT	0.566014
GCTAATTT	AAATTAGC	0.566014
ATATGCAG	CTGCATAT	0.565982
GCATATCA	TGATATGC	0.565982
AAAAGAAA	TTTCTTTT	0.565939
TCTTTTCA	TGAAAAGA	0.565939
ATGCTAAA	TTTAGCAT	0.565372
TAGCATCG	CGATGCTA	0.565372
ATTAGCAA	TTGCTAAT	0.565363
GCTAATTG	CAATTAGC	0.565363
AAAGAGAA	TTCTCTTT	0.565091
CTCTTTGT	ACAAAGAG	0.565091
CATTACAG	CTGTAATG	0.565038
GTAATGCA	TGCATTAC	0.565038
ATGTAAAT	ATTTACAT	0.565009
TTACATAG	CTATGTAA	0.565009
AATTTGCA	TGCAAATT	0.564966
CAAATTTC	GAAATTTG	0.564966
AAAGGAAC	GTTCCTTT	0.564944
TCCTTTCG	CGAAAGGA	0.564944
ATTAGCAG	CTGCTAAT	0.564522
GCTAATGG	CCATTAGC	0.564522
TGCAAATG	CATTTGCA	0.564432
TTTGCAGC	GCTGCAAA	0.564432
CTGCAGAG	CTCTGCAG	0.56443
CTGCAGAT	ATCTGCAG	0.56443
GAACAATA	TATTGTTC	0.564231
TTGTTCTC	GAGAACAA	0.564231
CTCCACCC	GGGTGGAG	0.564036
GTGGAGAC	GTCTCCAC	0.564036
AAAGGAAC	GTTCCTTT	0.564016
TCCTTTTG	CAAAAGGA	0.564016
ATATGCAG	CTGCATAT	0.563717
GCATATTT	AAATATGC	0.563717
ACATAACA	TGTTATGT	0.563685
TTATGTAT	ATACATAA	0.563685
ACACCCTG	CAGGGTGT	0.563653
GGGTGTGT	ACACACCC	0.563653
AAAAGACA	TGTCTTTT	0.56365
TCTTTTCT	AGAAAAGA	0.56365
AGTCAAAC	GTTTGACT	0.563528
TTGACTTT	AAAGTCAA	0.563528
TGTAAATC	GATTTACA	0.563443
TTTACATC	GATGTAAA	0.563443
AACAATGA	TCATTGTT	0.563288
ATTGTTAA	TTAACAAT	0.563288
CAAAAGTC	GACTTTTG	0.56303
CTTTTGCA	TGCAAAAG	0.56303
TATGCAAG	CTTGCATA	0.562965
TGCATATC	GATATGCA	0.562965
CAAAAGAA	TTCTTTTG	0.562882
CTTTTGGC	GCCAAAAG	0.562882
AAAGAAAG	CTTTCTTT	0.562811
TTCTTTTT	AAAAAGAA	0.562811
GCATTACA	TGTAATGC	0.562793
TAATGCAC	GTGCATTA	0.562793
ACAAAGAA	TTCTTTGT	0.562759
CTTTGTTA	TAACAAAG	0.562759
TTACAAAA	TTTTGTAA	0.562732
TTGTAATG	CATTACAA	0.562732
GCATAACT	AGTTATGC	0.562544
TTATGCAA	TTGCATAA	0.562544
AACAAAGA	TCTTTGTT	0.562401
TTTGTTCG	CGAACAAA	0.562401
AAATGAAA	TTTCATTT	0.562388
TCATTTGT	ACAAATGA	0.562388
AATGAAAT	ATTTCATT	0.562277
TTCATTTG	CAAATGAA	0.562277
GAATAACA	TGTTATTC	0.5622
TTATTCAA	TTGAATAA	0.5622
ACAATGAA	TTCATTGT	0.562182
CATTGTTA	TAACAATG	0.562182
AACAAAGA	TCTTTGTT	0.562164
TTTGTTTC	GAAACAAA	0.562164
GCCCCACC	GGTGGGGC	0.561958
TGGGGCTA	TAGCCCCA	0.561958
AGGTCACA	TGTGACCT	0.561933
TGACCTTC	GAAGGTCA	0.561933
ACCTTCAG	CTGAAGGT	0.56191
GAAGGTCA	TGACCTTC	0.56191
ACAAAGGG	CCCTTTGT	0.561661
CTTTGTTT	AAACAAAG	0.561661
GTCAAATG	CATTTGAC	0.561632
TTTGACCT	AGGTCAAA	0.561632
GGAAACAG	CTGTTTCC	0.561375
GTTTCCTG	CAGGAAAC	0.561375
TATGCAGA	TCTGCATA	0.561312
TGCATATA	TATATGCA	0.561312
ATTTACAC	GTGTAAAT	0.56118
GTAAATGA	TCATTTAC	0.56118
GCTAAACA	TGTTTAGC	0.560827
TTTAGCAT	ATGCTAAA	0.560827
TATGCATC	GATGCATA	0.56049
TGCATATC	GATATGCA	0.56049
AAATGCAA	TTGCATTT	0.560484
GCATTTCG	CGAAATGC	0.560484
ACAACAAA	TTTGTTGT	0.560416
TGTTGTCA	TGACAACA	0.560416
ATGAATAT	ATATTCAT	0.560272
ATTCATTT	AAATGAAT	0.560272
GGAAACAC	GTGTTTCC	0.560231
GTTTCCTT	AAGGAAAC	0.560231
CAAATGGT	ACCATTTG	0.56022
CATTTGCA	TGCAAATG	0.56022
CATTTACA	TGTAAATG	0.559973
TAAATGAG	CTCATTTA	0.559973
CATATGCA	TGCATATG	0.559874
CATATGCC	GGCATATG	0.559874
ATTTGCAG	CTGCAAAT	0.559855
GCAAATCA	TGATTTGC	0.559855
AAATGCAA	TTGCATTT	0.559709
GCATTTCT	AGAAATGC	0.559709
GGCCAAAG	CTTTGGCC	0.559614
TTGGCCTT	AAGGCCAA	0.559614
CAAAGAGA	TCTCTTTG	0.559577
TCTTTGTT	AACAAAGA	0.559577
ATTTACAT	ATGTAAAT	0.559456
GTAAATAA	TTATTTAC	0.559456
CTTTTATG	CATAAAAG	0.559182
TAAAAGAC	GTCTTTTA	0.559182
GCAAAACA	TGTTTTGC	0.558936
TTTTGCAC	GTGCAAAA	0.558936
CCCTGCCA	TGGCAGGG	0.558666
GCAGGGTC	GACCCTGC	0.558666
AAATGAAA	TTTCATTT	0.558431
TCATTTAC	GTAAATGA	0.558431
AAGGAAGC	GCTTCCTT	0.558264
TTCCTTTC	GAAAGGAA	0.558264
TGCAAATC	GATTTGCA	0.558116
TTTGCACA	TGTGCAAA	0.558116
GCCACAAA	TTTGTGGC	0.557958
TGTGGCTT	AAGCCACA	0.557958
AAAAGTCC	GGACTTTT	0.55793
ACTTTTGC	GCAAAAGT	0.55793
AAATGCAA	TTGCATTT	0.557545
GCATTTGC	GCAAATGC	0.557545
CATTTACA	TGTAAATG	0.557285
TAAATGCT	AGCATTTA	0.557285
GAACAAAA	TTTTGTTC	0.557149
TTGTTCTA	TAGAACAA	0.557149
TATTCAAT	ATTGAATA	0.557032
TGAATAAC	GTTATTCA	0.557032
AAAGTCCA	TGGACTTT	0.557001
GACTTTTG	CAAAAGTC	0.557001
ATTTGCAC	GTGCAAAT	0.556905
GCAAATCG	CGATTTGC	0.556905
TATGCAGA	TCTGCATA	0.556789
TGCATAAC	GTTATGCA	0.556789
GCAAAACA	TGTTTTGC	0.556558
TTTTGCAA	TTGCAAAA	0.556558
TGTAAATG	CATTTACA	0.556524
TTTACAAT	ATTGTAAA	0.556524
AATGGCCA	TGGCCATT	0.55652
GCCATTGT	ACAATGGC	0.55652
TATGCATA	TATGCATA	0.556204
TGCATAAC	GTTATGCA	0.556204
AGAACAAA	TTTGTTCT	0.5561
TGTTCTTG	CAAGAACA	0.5561
AAAGAAAG	CTTTCTTT	0.556007
TTCTTTTA	TAAAAGAA	0.556007
GAGGCCAA	TTGGCCTC	0.555906
GGCCTCCA	TGGAGGCC	0.555906
TCTGCAGA	TCTGCAGA	0.55585
TGCAGATA	TATCTGCA	0.55585
GGTGGAGA	TCTCCACC	0.555738
TCCACCCT	AGGGTGGA	0.555738
AATAACAA	TTGTTATT	0.555695
GTTATTCA	TGAATAAC	0.555695
CAAATCGT	ACGATTTG	0.555682
GATTTGCA	TGCAAATC	0.555682
CAAAACAA	TTGTTTTG	0.555443
GTTTTGTT	AACAAAAC	0.555443
ATGACAAT	ATTGTCAT	0.555419
TGTCATGC	GCATGACA	0.555419
AAGGTCAT	ATGACCTT	0.555296
GACCTTCA	TGAAGGTC	0.555296
AAAAGAAA	TTTCTTTT	0.555151
TCTTTTCC	GGAAAAGA	0.555151
TAACAATT	AATTGTTA	0.555144
TTGTTATT	AATAACAA	0.555144
TATGCATG	CATGCATA	0.555071
TGCATATC	GATATGCA	0.555071
GAGAACAA	TTGTTCTC	0.554944
GTTCTCTT	AAGAGAAC	0.554944
AGGTCAAA	TTTGACCT	0.554837
TGACCTGT	ACAGGTCA	0.554837
AAAAAAGT	ACTTTTTT	0.554643
TTTTTTTC	GAAAAAAA	0.554643
ACCCTGGG	CCCAGGGT	0.554562
CAGGGTTC	GAACCCTG	0.554562
ATGCTAAT	ATTAGCAT	0.554534
TAGCATAC	GTATGCTA	0.554534
ATATGCAG	CTGCATAT	0.554261
GCATATCG	CGATATGC	0.554261
AATGAATA	TATTCATT	0.554024
TTCATTTC	GAAATGAA	0.554024
AAAACAAA	TTTGTTTT	0.553733
TGTTTTCT	AGAAAACA	0.553733
AGGTCAAC	GTTGACCT	0.553714
TGACCTTA	TAAGGTCA	0.553714
GCAGGCCG	CGGCCTGC	0.553491
GCCTGCAG	CTGCAGGC	0.553491
GAACAATC	GATTGTTC	0.553316
TTGTTCTG	CAGAACAA	0.553316
CCCTGCCC	GGGCAGGG	0.553264
GCAGGGTG	CACCCTGC	0.553264
TCACAATG	CATTGTGA	0.553222
TTGTGAAT	ATTCACAA	0.553222
AGGAAACA	TGTTTCCT	0.55314
TTTCCTTA	TAAGGAAA	0.55314
CATTCAGT	ACTGAATG	0.55308
TGAATGAA	TTCATTCA	0.55308
[truncated: 1,046,576+ more rows]

## Sheet: 2D - gkmSVM_8merTop50TOMTOMe27
#Query ID	Target ID	Optimal offset	p-value	E-value	q-value	Overlap	Query consensus	Target consensus	Orientation
TTTGCATA	V_OCT1_01	6	7.60138e-07	0.000944851	0.00111769	8	TTTGCATA	CCGAAATTTGCATATTGAA	-
TTTGCATA	V_OCT_C	4	1.29664e-06	0.00161173	0.00111769	8	TTTGCATA	CTCATTTGCATAC	+
TTTGCATA	Pou2f3_3986.2	5	1.94496e-06	0.00241759	0.00111769	8	TTTGCATA	TCTAATTTGCATACAA	-
TTTGCATA	MA0453.1	4	2.00173e-06	0.00248815	0.00111769	8	TTTGCATA	CTAATTTGCATA	-
TTTGCATA	V_OCT1_05	4	2.44004e-06	0.00303297	0.00111769	8	TTTGCATA	ATAATTTGCATATT	+
TTTGCATA	Pou2f2_3748.1	5	2.70584e-06	0.00336336	0.00111769	8	TTTGCATA	TCTAATTTGCATACAA	-
TTTGCATA	MA0142.1	1	1.80208e-05	0.0223999	0.00638038	8	TTTGCATA	ATTTGCATAACAAAG	-
TTTGCATA	V_OCT1_Q6	4	3.40587e-05	0.042335	0.0105513	8	TTTGCATA	GTGATTTGCATATTT	-
TTTGCATA	V_OCT1_04	8	6.81162e-05	0.0846685	0.0187576	8	TTTGCATA	TCTTTTAATTTGCATAATCATAA	-
TTTGCATA	MA0143.1	0	7.9764e-05	0.0991467	0.0197687	8	TTTGCATA	TTTGCATAACAAAGG	-
TTTGCATA	MA0254.1	-2	0.000340843	0.423668	0.0767949	6	TTTGCATA	TGCATA	-
TTTGCATA	V_OCT1_07	2	0.00054932	0.682805	0.113453	8	TTTGCATA	AATTAGCATACA	-
TTTGCATA	Pou3f3_3235.2	4	0.000705633	0.877102	0.134526	8	TTTGCATA	AAAATATGCATAATAAA	+
TTTGCATA	MA0446.1	2	0.00134737	1.67478	0.222621	8	TTTGCATA	TGTTTGCTTAA	+
TTTGCATA	V_OCT1_02	2	0.0016793	2.08737	0.25215	8	TTTGCATA	TAAATGCATATTCAT	-
TTTGCATA	V_POU3F2_02	1	0.00172957	2.14986	0.25215	8	TTTGCATA	ATTAACATAA	-
TTTGCATA	Mtf1_primary	2	0.00415124	5.15999	0.556612	8	TTTGCATA	TTTTTGCACACGGCCC	-
TTTGCATA	Mafb_secondary	2	0.0044318	5.50872	0.556612	8	TTTGCATA	CAATTGCAAAAATAT	+
TTTGCATA	MA0148.1	2	0.00449172	5.5832	0.556612	8	TTTGCATA	TGTTTACTTTG	+
TTTGCATA	V_CEBP_Q2	2	0.00577789	7.18192	0.681899	8	TTTGCATA	ACATTGCGTAATTA	+
ATGCAAAT	V_OCT_C	2	3.80069e-07	0.000472426	0.000943869	8	ATGCAAAT	GTATGCAAATGAG	-
ATGCAAAT	V_OCT1_01	6	7.60138e-07	0.000944851	0.000943869	8	ATGCAAAT	ATCAATATGCAAATTTCGG	+
ATGCAAAT	Pou2f3_3986.2	4	1.61401e-06	0.00200622	0.000944075	8	ATGCAAAT	TTGTATGCAAATTAGA	+
ATGCAAAT	V_OCT1_05	3	1.79543e-06	0.00223172	0.000944075	8	ATGCAAAT	AATATGCAAATTAG	-
ATGCAAAT	Pou2f2_3748.1	4	1.94496e-06	0.00241759	0.000944075	8	ATGCAAAT	TTGTATGCAAATTAGA	+
ATGCAAAT	MA0453.1	1	2.28091e-06	0.00283517	0.000944075	8	ATGCAAAT	TATGCAAATTAG	+
ATGCAAAT	V_OCT1_Q6	4	3.64945e-06	0.00453627	0.00129473	8	ATGCAAAT	GAATATGCAAATCAG	+
ATGCAAAT	MA0142.1	7	5.81474e-06	0.00722772	0.00180505	8	ATGCAAAT	CTTTGTTATGCAAAT	+
ATGCAAAT	V_OCT1_04	8	3.60413e-05	0.0447993	0.00994506	8	ATGCAAAT	ATATAATTATGCAAATTAAAAGA	+
ATGCAAAT	V_OCT1_07	3	0.000520748	0.64729	0.129323	8	ATGCAAAT	TCTATGCTAATT	+
ATGCAAAT	MA0274.1	0	0.000798292	0.992277	0.180226	8	ATGCAAAT	ATTCAAGT	-
ATGCAAAT	V_POU3F2_02	2	0.00172957	2.14986	0.357937	8	ATGCAAAT	TTATGTTAAT	+
ATGCAAAT	F_MATA1_01	2	0.00248186	3.08495	0.448585	8	ATGCAAAT	TGATGTAAAT	+
ATGCAAAT	MA0328.1	1	0.00252885	3.14336	0.448585	8	ATGCAAAT	CATGTAATT	+
ATGCAAAT	Pou3f3_3235.2	6	0.00334386	4.15642	0.553613	8	ATGCAAAT	TTTATTATGCATATTTT	-
TTGCATAA	MA0142.1	2	3.40587e-05	0.042335	0.0540807	8	TTGCATAA	ATTTGCATAACAAAG	-
TTGCATAA	MA0143.1	1	7.45862e-05	0.0927106	0.0540807	8	TTGCATAA	TTTGCATAACAAAGG	-
TTGCATAA	V_OCT1_01	7	9.112e-05	0.113262	0.0540807	8	TTGCATAA	CCGAAATTTGCATATTGAA	-
TTGCATAA	Pou2f3_3986.2	6	9.59071e-05	0.119212	0.0540807	8	TTGCATAA	TCTAATTTGCATACAA	-
TTGCATAA	Pou2f2_3748.1	6	0.00010937	0.135947	0.0540807	8	TTGCATAA	TCTAATTTGCATACAA	-
TTGCATAA	V_CEBP_Q2	3	0.000241778	0.300531	0.0906808	8	TTGCATAA	ACATTGCGTAATTA	+
TTGCATAA	MA0254.1	-1	0.000340843	0.423668	0.0906808	6	TTGCATAA	TGCATA	-
TTGCATAA	V_OCT_C	5	0.000345229	0.42912	0.0906808	8	TTGCATAA	CTCATTTGCATAC	+
TTGCATAA	V_OCT1_04	9	0.000363176	0.451427	0.0906808	8	TTGCATAA	TCTTTTAATTTGCATAATCATAA	-
TTGCATAA	Mafb_secondary	3	0.000366778	0.455905	0.0906808	8	TTGCATAA	CAATTGCAAAAATAT	+
TTGCATAA	V_OCT1_05	5	0.000471977	0.586667	0.106082	8	TTGCATAA	ATAATTTGCATATT	+
TTGCATAA	V_CEBPB_02	3	0.000614956	0.76439	0.126699	8	TTGCATAA	ATATTGCGCAACTC	+
TTGCATAA	MA0025.1	3	0.000830025	1.03172	0.15034	8	TTGCATAA	ATGTTACATAA	-
TTGCATAA	Pou3f3_3235.2	5	0.000916952	1.13977	0.15034	8	TTGCATAA	AAAATATGCATAATAAA	+
TTGCATAA	V_E4BP4_01	2	0.000925135	1.14994	0.15034	8	TTGCATAA	CGTTACATAACG	-
TTGCATAA	MA0102.2	1	0.000972933	1.20936	0.15034	8	TTGCATAA	ATTGCGAAA	-
TTGCATAA	V_CEBPB_01	3	0.00104008	1.29281	0.151261	8	TTGCATAA	ACATTGCACAATCT	-
TTGCATAA	V_CEBPA_01	3	0.00140679	1.74864	0.193228	8	TTGCATAA	ATATTGCAAAATCA	+
TTGCATAA	V_VBP_01	1	0.00181032	2.25022	0.223112	8	TTGCATAA	GTTACGTAAT	+
TTGCATAA	V_CEBP_C	6	0.0018751	2.33075	0.223112	8	TTGCATAA	TGTGCATTGCCAAATACC	-
TTGCATAA	V_POU3F2_02	2	0.00189509	2.3556	0.223112	8	TTGCATAA	ATTAACATAA	-
TTGCATAA	MA0446.1	3	0.00204004	2.53577	0.22926	8	TTGCATAA	TGTTTGCTTAA	+
TTGCATAA	V_OCT1_Q6	5	0.00234803	2.9186	0.252399	8	TTGCATAA	GTGATTTGCATATTT	-
TTGCATAA	MA0043.1	2	0.00261498	3.25043	0.268021	8	TTGCATAA	TATTACGTAACC	-
TTGCATAA	V_HLF_01	1	0.00271017	3.36874	0.268021	8	TTGCATAA	ATTACGTAAC	-
TTGCATAA	N_CES2_01	1	0.00554579	6.89341	0.507822	8	TTGCATAA	GTTACGTAAT	-
TTGCATAA	V_OCT1_07	3	0.0059455	7.39026	0.52498	8	TTGCATAA	AATTAGCATACA	-
TTGCATAA	MA0284.1	2	0.00626931	7.79275	0.534483	8	TTGCATAA	GATTACGTAA	-
TTGCATAA	V_CREBP1_01	0	0.00688022	8.55211	0.567013	8	TTGCATAA	TTACGTAA	+
TTGCATAA	MA0019.1	4	0.00729451	9.06708	0.573059	8	TTGCATAA	GGGATTGCATCT	-
TTGCATAA	MA0447.1	1	0.007972	9.9092	0.579696	8	TTGCATAA	ATTACGTAAT	+
TTGCATAA	V_CHOP_01	5	0.00858569	10.672	0.606484	8	TTGCATAA	GGGGATTGCATCT	-
TTGCATAA	V_OCT1_02	3	0.00950291	11.8121	0.63499	8	TTGCATAA	TAAATGCATATTCAT	-
TATGCAAA	V_OCT1_01	5	7.60138e-07	0.000944851	0.00111769	8	TATGCAAA	ATCAATATGCAAATTTCGG	+
TATGCAAA	V_OCT_C	1	1.29664e-06	0.00161173	0.00111769	8	TATGCAAA	GTATGCAAATGAG	-
TATGCAAA	Pou2f3_3986.2	3	1.94496e-06	0.00241759	0.00111769	8	TATGCAAA	TTGTATGCAAATTAGA	+
TATGCAAA	MA0453.1	0	2.00173e-06	0.00248815	0.00111769	8	TATGCAAA	TATGCAAATTAG	+
TATGCAAA	V_OCT1_05	2	2.44004e-06	0.00303297	0.00111769	8	TATGCAAA	AATATGCAAATTAG	-
TATGCAAA	Pou2f2_3748.1	3	2.70584e-06	0.00336336	0.00111769	8	TATGCAAA	TTGTATGCAAATTAGA	+
TATGCAAA	MA0142.1	6	1.80208e-05	0.0223999	0.00638038	8	TATGCAAA	CTTTGTTATGCAAAT	+
TATGCAAA	V_OCT1_Q6	3	3.40587e-05	0.042335	0.0105513	8	TATGCAAA	GAATATGCAAATCAG	+
TATGCAAA	V_OCT1_04	7	6.81162e-05	0.0846685	0.0187576	8	TATGCAAA	ATATAATTATGCAAATTAAAAGA	+
TATGCAAA	MA0143.1	7	7.9764e-05	0.0991467	0.0197687	8	TATGCAAA	CCTTTGTTATGCAAA	+
TATGCAAA	MA0254.1	0	0.000340843	0.423668	0.0767949	6	TATGCAAA	TATGCA	+
TATGCAAA	V_OCT1_07	2	0.00054932	0.682805	0.113453	8	TATGCAAA	TCTATGCTAATT	+
TATGCAAA	Pou3f3_3235.2	5	0.000705633	0.877102	0.134526	8	TATGCAAA	TTTATTATGCATATTTT	-
TATGCAAA	MA0446.1	1	0.00134737	1.67478	0.222621	8	TATGCAAA	TTAAGCAAACA	-
TATGCAAA	V_OCT1_02	5	0.0016793	2.08737	0.25215	8	TATGCAAA	ATGAATATGCATATA	+
TATGCAAA	V_POU3F2_02	1	0.00172957	2.14986	0.25215	8	TATGCAAA	TTATGTTAAT	+
TATGCAAA	Mtf1_primary	6	0.00415124	5.15999	0.556612	8	TATGCAAA	GGGCCGTGTGCAAAAA	+
TATGCAAA	Mafb_secondary	5	0.0044318	5.50872	0.556612	8	TATGCAAA	ATATTTTTGCAATTG	-
TATGCAAA	MA0148.1	1	0.00449172	5.5832	0.556612	8	TATGCAAA	CAAAGTAAACA	-
TATGCAAA	V_CEBP_Q2	4	0.00577789	7.18192	0.681899	8	TATGCAAA	TAATTATGCAATGT	-
TGCATATG	MA0254.1	0	0.000340843	0.423668	0.43617	6	TGCATATG	TGCATA	-
TGCATATG	V_OCT1_01	8	0.000365359	0.454141	0.43617	8	TGCATATG	CCGAAATTTGCATATTGAA	-
TGCATATG	V_OCT1_05	6	0.000635881	0.7904	0.43617	8	TGCATATG	ATAATTTGCATATT	+
TGCATATG	MA0249.1	1	0.000850726	1.05745	0.43617	8	TGCATATG	TCGCATATGTTG	+
TGCATATG	V_OCT1_02	4	0.00104066	1.29354	0.43617	8	TGCATATG	TAAATGCATATTCAT	-
TGCATATG	Pou3f3_3235.2	7	0.00110966	1.37931	0.43617	8	TGCATATG	TTTATTATGCATATTTT	-
TGCATATG	V_OCT_C	3	0.00122943	1.52818	0.43617	8	TGCATATG	GTATGCAAATGAG	-
TGCATATG	Pou2f2_3748.1	7	0.00209246	2.60093	0.639302	8	TGCATATG	TCTAATTTGCATACAA	-
TGCATATG	Pou2f3_3986.2	7	0.0027644	3.43615	0.686516	8	TGCATATG	TCTAATTTGCATACAA	-
TGCAAATG	V_OCT_C	3	3.79767e-06	0.00472051	0.00944101	8	TGCAAATG	GTATGCAAATGAG	-
TGCAAATG	MA0453.1	2	5.17358e-05	0.0643076	0.0381365	8	TGCAAATG	TATGCAAATTAG	+
TGCAAATG	Pou2f3_3986.2	5	5.87678e-05	0.0730483	0.0381365	8	TGCAAATG	TTGTATGCAAATTAGA	+
TGCAAATG	V_OCT1_05	4	7.24294e-05	0.0900298	0.0381365	8	TGCAAATG	AATATGCAAATTAG	-
TGCAAATG	Pou2f2_3748.1	5	7.67025e-05	0.0953412	0.0381365	8	TGCAAATG	TTGTATGCAAATTAGA	+
TGCAAATG	V_OCT1_01	7	0.00024389	0.303155	0.101052	8	TGCAAATG	ATCAATATGCAAATTTCGG	+
TGCAAATG	V_OCT1_Q6	5	0.000323266	0.40182	0.114806	8	TGCAAATG	GAATATGCAAATCAG	+
TGCAAATG	V_OCT1_04	9	0.00150662	1.87273	0.468182	8	TGCAAATG	ATATAATTATGCAAATTAAAAGA	+
TGCAAATG	Mafb_secondary	7	0.00186801	2.32194	0.515987	8	TGCAAATG	ATATTTTTGCAATTG	-
TTTGCATT	V_OCT1_Q6	4	7.45862e-05	0.0927106	0.185079	8	TTTGCATT	GTGATTTGCATATTT	-
TTTGCATT	V_OCT_C	4	0.000364596	0.453193	0.231199	8	TTTGCATT	CTCATTTGCATAC	+
TTTGCATT	MA0142.1	1	0.000433003	0.538223	0.231199	8	TTTGCATT	ATTTGCATAACAAAG	-
TTTGCATT	V_OCT1_05	4	0.000447263	0.555948	0.231199	8	TTTGCATT	ATAATTTGCATATT	+
TTTGCATT	Pou2f2_3748.1	5	0.000636394	0.791038	0.231199	8	TTTGCATT	TCTAATTTGCATACAA	-
TTTGCATT	MA0453.1	4	0.000679705	0.844873	0.231199	8	TTTGCATT	CTAATTTGCATA	-
TTTGCATT	V_OCT1_04	8	0.000688264	0.855512	0.231199	8	TTTGCATT	TCTTTTAATTTGCATAATCATAA	-
TTTGCATT	Pou2f3_3986.2	5	0.000745381	0.926509	0.231199	8	TTTGCATT	TCTAATTTGCATACAA	-
TTTGCATT	V_OCT1_01	6	0.00128239	1.59401	0.350234	8	TTTGCATT	CCGAAATTTGCATATTGAA	-
TTTGCATT	MA0244.1	0	0.00141143	1.75441	0.350234	8	TTTGCATT	TTTGCAAT	-
TTTGCATT	F_ABAA_01	3	0.00194107	2.41275	0.416173	8	TTTGCATT	CCTTCTGCATTCCTGTGCT	+
TTTGCATT	MA0045.1	3	0.00228084	2.83508	0.416173	8	TTTGCATT	GTTTTTCCATTTGTTG	-
TTTGCATT	MA0148.1	2	0.00233516	2.90261	0.416173	8	TTTGCATT	TGTTTACTTTG	+
TTTGCATT	MA0143.1	0	0.00234803	2.9186	0.416173	8	TTTGCATT	TTTGCATAACAAAGG	-
TTTGCATT	Foxk1_primary	7	0.00304793	3.78858	0.50421	8	TTTGCATT	CTGTTTGTTTACATTTT	-
TTTGCATT	Mafb_secondary	5	0.00371135	4.61321	0.575586	8	TTTGCATT	ATATTTTTGCAATTG	-
TTTGCATT	Foxl1_primary	7	0.00419807	5.2182	0.612771	8	TTTGCATT	ACCTTTGTTTACATTTA	-
TATGCAAA	V_OCT1_01	5	7.60138e-07	0.000944851	0.00111769	8	TATGCAAA	ATCAATATGCAAATTTCGG	+
TATGCAAA	V_OCT_C	1	1.29664e-06	0.00161173	0.00111769	8	TATGCAAA	GTATGCAAATGAG	-
TATGCAAA	Pou2f3_3986.2	3	1.94496e-06	0.00241759	0.00111769	8	TATGCAAA	TTGTATGCAAATTAGA	+
TATGCAAA	MA0453.1	0	2.00173e-06	0.00248815	0.00111769	8	TATGCAAA	TATGCAAATTAG	+
TATGCAAA	V_OCT1_05	2	2.44004e-06	0.00303297	0.00111769	8	TATGCAAA	AATATGCAAATTAG	-
TATGCAAA	Pou2f2_3748.1	3	2.70584e-06	0.00336336	0.00111769	8	TATGCAAA	TTGTATGCAAATTAGA	+
TATGCAAA	MA0142.1	6	1.80208e-05	0.0223999	0.00638038	8	TATGCAAA	CTTTGTTATGCAAAT	+
TATGCAAA	V_OCT1_Q6	3	3.40587e-05	0.042335	0.0105513	8	TATGCAAA	GAATATGCAAATCAG	+
TATGCAAA	V_OCT1_04	7	6.81162e-05	0.0846685	0.0187576	8	TATGCAAA	ATATAATTATGCAAATTAAAAGA	+
TATGCAAA	MA0143.1	7	7.9764e-05	0.0991467	0.0197687	8	TATGCAAA	CCTTTGTTATGCAAA	+
TATGCAAA	MA0254.1	0	0.000340843	0.423668	0.0767949	6	TATGCAAA	TATGCA	+
TATGCAAA	V_OCT1_07	2	0.00054932	0.682805	0.113453	8	TATGCAAA	TCTATGCTAATT	+
TATGCAAA	Pou3f3_3235.2	5	0.000705633	0.877102	0.134526	8	TATGCAAA	TTTATTATGCATATTTT	-
TATGCAAA	MA0446.1	1	0.00134737	1.67478	0.222621	8	TATGCAAA	TTAAGCAAACA	-
TATGCAAA	V_OCT1_02	5	0.0016793	2.08737	0.25215	8	TATGCAAA	ATGAATATGCATATA	+
TATGCAAA	V_POU3F2_02	1	0.00172957	2.14986	0.25215	8	TATGCAAA	TTATGTTAAT	+
TATGCAAA	Mtf1_primary	6	0.00415124	5.15999	0.556612	8	TATGCAAA	GGGCCGTGTGCAAAAA	+
TATGCAAA	Mafb_secondary	5	0.0044318	5.50872	0.556612	8	TATGCAAA	ATATTTTTGCAATTG	-
TATGCAAA	MA0148.1	1	0.00449172	5.5832	0.556612	8	TATGCAAA	CAAAGTAAACA	-
TATGCAAA	V_CEBP_Q2	4	0.00577789	7.18192	0.681899	8	TATGCAAA	TAATTATGCAATGT	-
TGCATATT	V_OCT1_02	4	1.39324e-05	0.0173179	0.0317412	8	TGCATATT	TAAATGCATATTCAT	-
TGCATATT	V_OCT1_05	6	2.55729e-05	0.0317871	0.0317412	8	TGCATATT	ATAATTTGCATATT	+
TGCATATT	V_OCT1_01	8	5.50749e-05	0.0684581	0.0455728	8	TGCATATT	CCGAAATTTGCATATTGAA	-
TGCATATT	MA0254.1	0	0.000308321	0.383244	0.169006	6	TGCATATT	TGCATA	-
TGCATATT	Pou3f3_3235.2	6	0.000385962	0.47975	0.169006	8	TGCATATT	AAAATATGCATAATAAA	+
TGCATATT	V_OCT1_Q6	6	0.0010667	1.32591	0.378285	8	TGCATATT	GTGATTTGCATATTT	-
TGCATATT	Pou2f2_3748.1	7	0.00179112	2.22636	0.548327	8	TGCATATT	TCTAATTTGCATACAA	-
TGCATATT	V_OCT1_04	9	0.00209796	2.60776	0.548327	8	TGCATATT	ATATAATTATGCAAATTAAAAGA	+
TGCATATT	Pou2f3_3986.2	5	0.00275435	3.42366	0.569786	8	TGCATATT	TTGTATGCAAATTAGA	+
TGCATATT	MA0453.1	2	0.00405521	5.04062	0.629169	8	TGCATATT	TATGCAAATTAG	+
ATGCAAAT	V_OCT_C	2	3.80069e-07	0.000472426	0.000943869	8	ATGCAAAT	GTATGCAAATGAG	-
ATGCAAAT	V_OCT1_01	6	7.60138e-07	0.000944851	0.000943869	8	ATGCAAAT	ATCAATATGCAAATTTCGG	+
ATGCAAAT	Pou2f3_3986.2	4	1.61401e-06	0.00200622	0.000944075	8	ATGCAAAT	TTGTATGCAAATTAGA	+
ATGCAAAT	V_OCT1_05	3	1.79543e-06	0.00223172	0.000944075	8	ATGCAAAT	AATATGCAAATTAG	-
ATGCAAAT	Pou2f2_3748.1	4	1.94496e-06	0.00241759	0.000944075	8	ATGCAAAT	TTGTATGCAAATTAGA	+
ATGCAAAT	MA0453.1	1	2.28091e-06	0.00283517	0.000944075	8	ATGCAAAT	TATGCAAATTAG	+
ATGCAAAT	V_OCT1_Q6	4	3.64945e-06	0.00453627	0.00129473	8	ATGCAAAT	GAATATGCAAATCAG	+
ATGCAAAT	MA0142.1	7	5.81474e-06	0.00722772	0.00180505	8	ATGCAAAT	CTTTGTTATGCAAAT	+
ATGCAAAT	V_OCT1_04	8	3.60413e-05	0.0447993	0.00994506	8	ATGCAAAT	ATATAATTATGCAAATTAAAAGA	+
ATGCAAAT	V_OCT1_07	3	0.000520748	0.64729	0.129323	8	ATGCAAAT	TCTATGCTAATT	+
ATGCAAAT	MA0274.1	0	0.000798292	0.992277	0.180226	8	ATGCAAAT	ATTCAAGT	-
ATGCAAAT	V_POU3F2_02	2	0.00172957	2.14986	0.357937	8	ATGCAAAT	TTATGTTAAT	+
ATGCAAAT	F_MATA1_01	2	0.00248186	3.08495	0.448585	8	ATGCAAAT	TGATGTAAAT	+
ATGCAAAT	MA0328.1	1	0.00252885	3.14336	0.448585	8	ATGCAAAT	CATGTAATT	+
ATGCAAAT	Pou3f3_3235.2	6	0.00334386	4.15642	0.553613	8	ATGCAAAT	TTTATTATGCATATTTT	-
TTGCATAC	V_OCT_C	5	7.98665e-06	0.0099274	0.0191635	8	TTGCATAC	CTCATTTGCATAC	+
TTGCATAC	Pou2f3_3986.2	6	1.54207e-05	0.0191679	0.0191635	8	TTGCATAC	TCTAATTTGCATACAA	-
TTGCATAC	Pou2f2_3748.1	6	3.11074e-05	0.0386665	0.0257717	8	TTGCATAC	TCTAATTTGCATACAA	-
TTGCATAC	V_OCT1_05	5	0.000105327	0.130922	0.0654458	8	TTGCATAC	ATAATTTGCATATT	+
TTGCATAC	V_OCT1_01	7	0.000216518	0.269131	0.107628	8	TTGCATAC	CCGAAATTTGCATATTGAA	-
TTGCATAC	V_OCT1_Q6	5	0.000289315	0.359619	0.119845	8	TTGCATAC	GTGATTTGCATATTT	-
TTGCATAC	MA0254.1	-1	0.000375808	0.467129	0.133435	6	TTGCATAC	TGCATA	-
TTGCATAC	V_OCT1_04	9	0.00150662	1.87273	0.411849	8	TTGCATAC	TCTTTTAATTTGCATAATCATAA	-
TTGCATAC	Mtf1_primary	3	0.00164809	2.04858	0.411849	8	TTGCATAC	TTTTTGCACACGGCCC	-
TTGCATAC	MA0019.1	4	0.00165706	2.05972	0.411849	8	TTGCATAC	GGGATTGCATCT	-
TTGCATAC	V_CHOP_01	5	0.00196632	2.44413	0.444285	8	TTGCATAC	GGGGATTGCATCT	-
TTGCATAC	MA0142.1	2	0.00214977	2.67216	0.445258	8	TTGCATAC	ATTTGCATAACAAAG	-
TTGCATAC	V_OCT1_07	3	0.0027206	3.38171	0.520143	8	TTGCATAC	AATTAGCATACA	-
TGCAAATC	V_OCT1_Q6	5	1.89077e-05	0.0235023	0.0470046	8	TGCAAATC	GAATATGCAAATCAG	+
TGCAAATC	V_OCT1_05	4	7.24294e-05	0.0900298	0.0621581	8	TGCAAATC	AATATGCAAATTAG	-
TGCAAATC	V_OCT_C	3	7.50098e-05	0.0932372	0.0621581	8	TGCAAATC	GTATGCAAATGAG	-
TGCAAATC	MA0453.1	2	0.000153486	0.190784	0.0953918	8	TGCAAATC	TATGCAAATTAG	+
TGCAAATC	Pou2f3_3986.2	5	0.000231227	0.287415	0.114966	8	TGCAAATC	TTGTATGCAAATTAGA	+
TGCAAATC	Pou2f2_3748.1	5	0.000325053	0.404041	0.122594	8	TGCAAATC	TTGTATGCAAATTAGA	+
TGCAAATC	V_OCT1_01	7	0.000345195	0.429077	0.122594	8	TGCAAATC	ATCAATATGCAAATTTCGG	+
TGCAAATC	MA0434.1	0	0.00105686	1.31368	0.32842	8	TGCAAATC	TGTAGATCA	+
TGCAAATC	V_OCT1_04	9	0.0012178	1.51372	0.336383	8	TGCAAATC	ATATAATTATGCAAATTAAAAGA	+
TTTGCATT	V_OCT1_Q6	4	7.45862e-05	0.0927106	0.185079	8	TTTGCATT	GTGATTTGCATATTT	-
TTTGCATT	V_OCT_C	4	0.000364596	0.453193	0.231199	8	TTTGCATT	CTCATTTGCATAC	+
TTTGCATT	MA0142.1	1	0.000433003	0.538223	0.231199	8	TTTGCATT	ATTTGCATAACAAAG	-
TTTGCATT	V_OCT1_05	4	0.000447263	0.555948	0.231199	8	TTTGCATT	ATAATTTGCATATT	+
TTTGCATT	Pou2f2_3748.1	5	0.000636394	0.791038	0.231199	8	TTTGCATT	TCTAATTTGCATACAA	-
TTTGCATT	MA0453.1	4	0.000679705	0.844873	0.231199	8	TTTGCATT	CTAATTTGCATA	-
TTTGCATT	V_OCT1_04	8	0.000688264	0.855512	0.231199	8	TTTGCATT	TCTTTTAATTTGCATAATCATAA	-
TTTGCATT	Pou2f3_3986.2	5	0.000745381	0.926509	0.231199	8	TTTGCATT	TCTAATTTGCATACAA	-
TTTGCATT	V_OCT1_01	6	0.00128239	1.59401	0.350234	8	TTTGCATT	CCGAAATTTGCATATTGAA	-
TTTGCATT	MA0244.1	0	0.00141143	1.75441	0.350234	8	TTTGCATT	TTTGCAAT	-
TTTGCATT	F_ABAA_01	3	0.00194107	2.41275	0.416173	8	TTTGCATT	CCTTCTGCATTCCTGTGCT	+
TTTGCATT	MA0045.1	3	0.00228084	2.83508	0.416173	8	TTTGCATT	GTTTTTCCATTTGTTG	-
TTTGCATT	MA0148.1	2	0.00233516	2.90261	0.416173	8	TTTGCATT	TGTTTACTTTG	+
TTTGCATT	MA0143.1	0	0.00234803	2.9186	0.416173	8	TTTGCATT	TTTGCATAACAAAGG	-
TTTGCATT	Foxk1_primary	7	0.00304793	3.78858	0.50421	8	TTTGCATT	CTGTTTGTTTACATTTT	-
TTTGCATT	Mafb_secondary	5	0.00371135	4.61321	0.575586	8	TTTGCATT	ATATTTTTGCAATTG	-
TTTGCATT	Foxl1_primary	7	0.00419807	5.2182	0.612771	8	TTTGCATT	ACCTTTGTTTACATTTA	-
ATGCAAAT	V_OCT_C	2	3.80069e-07	0.000472426	0.000943869	8	ATGCAAAT	GTATGCAAATGAG	-
ATGCAAAT	V_OCT1_01	6	7.60138e-07	0.000944851	0.000943869	8	ATGCAAAT	ATCAATATGCAAATTTCGG	+
ATGCAAAT	Pou2f3_3986.2	4	1.61401e-06	0.00200622	0.000944075	8	ATGCAAAT	TTGTATGCAAATTAGA	+
ATGCAAAT	V_OCT1_05	3	1.79543e-06	0.00223172	0.000944075	8	ATGCAAAT	AATATGCAAATTAG	-
ATGCAAAT	Pou2f2_3748.1	4	1.94496e-06	0.00241759	0.000944075	8	ATGCAAAT	TTGTATGCAAATTAGA	+
ATGCAAAT	MA0453.1	1	2.28091e-06	0.00283517	0.000944075	8	ATGCAAAT	TATGCAAATTAG	+
ATGCAAAT	V_OCT1_Q6	4	3.64945e-06	0.00453627	0.00129473	8	ATGCAAAT	GAATATGCAAATCAG	+
ATGCAAAT	MA0142.1	7	5.81474e-06	0.00722772	0.00180505	8	ATGCAAAT	CTTTGTTATGCAAAT	+
ATGCAAAT	V_OCT1_04	8	3.60413e-05	0.0447993	0.00994506	8	ATGCAAAT	ATATAATTATGCAAATTAAAAGA	+
ATGCAAAT	V_OCT1_07	3	0.000520748	0.64729	0.129323	8	ATGCAAAT	TCTATGCTAATT	+
ATGCAAAT	MA0274.1	0	0.000798292	0.992277	0.180226	8	ATGCAAAT	ATTCAAGT	-
ATGCAAAT	V_POU3F2_02	2	0.00172957	2.14986	0.357937	8	ATGCAAAT	TTATGTTAAT	+
ATGCAAAT	F_MATA1_01	2	0.00248186	3.08495	0.448585	8	ATGCAAAT	TGATGTAAAT	+
ATGCAAAT	MA0328.1	1	0.00252885	3.14336	0.448585	8	ATGCAAAT	CATGTAATT	+
ATGCAAAT	Pou3f3_3235.2	6	0.00334386	4.15642	0.553613	8	ATGCAAAT	TTTATTATGCATATTTT	-
TTGCATTT	V_OCT1_Q6	5	0.000327711	0.407345	0.419681	8	TTGCATTT	GTGATTTGCATATTT	-
TTGCATTT	MA0019.1	4	0.000679705	0.844873	0.419681	8	TTGCATTT	GGGATTGCATCT	-
TTGCATTT	Mafk_secondary	2	0.000737623	0.916865	0.419681	8	TTGCATTT	CCTTGCAATTTTTTC	-
TTGCATTT	V_CHOP_01	5	0.00080872	1.00524	0.419681	8	TTGCATTT	GGGGATTGCATCT	-
TTGCATTT	V_OCT1_05	5	0.000844089	1.0492	0.419681	8	TTGCATTT	ATAATTTGCATATT	+
ATTTGCAT	V_OCT_C	3	3.80069e-07	0.000472426	0.000943869	8	ATTTGCAT	CTCATTTGCATAC	+
ATTTGCAT	V_OCT1_01	5	7.60138e-07	0.000944851	0.000943869	8	ATTTGCAT	CCGAAATTTGCATATTGAA	-
ATTTGCAT	Pou2f3_3986.2	4	1.61401e-06	0.00200622	0.000944075	8	ATTTGCAT	TCTAATTTGCATACAA	-
ATTTGCAT	V_OCT1_05	3	1.79543e-06	0.00223172	0.000944075	8	ATTTGCAT	ATAATTTGCATATT	+
ATTTGCAT	Pou2f2_3748.1	4	1.94496e-06	0.00241759	0.000944075	8	ATTTGCAT	TCTAATTTGCATACAA	-
ATTTGCAT	MA0453.1	3	2.28091e-06	0.00283517	0.000944075	8	ATTTGCAT	CTAATTTGCATA	-
ATTTGCAT	V_OCT1_Q6	3	3.64945e-06	0.00453627	0.00129473	8	ATTTGCAT	GTGATTTGCATATTT	-
ATTTGCAT	MA0142.1	0	5.81474e-06	0.00722772	0.00180505	8	ATTTGCAT	ATTTGCATAACAAAG	-
ATTTGCAT	V_OCT1_04	7	3.60413e-05	0.0447993	0.00994506	8	ATTTGCAT	TCTTTTAATTTGCATAATCATAA	-
ATTTGCAT	V_OCT1_07	1	0.000520748	0.64729	0.129323	8	ATTTGCAT	AATTAGCATACA	-
ATTTGCAT	MA0274.1	0	0.000798292	0.992277	0.180226	8	ATTTGCAT	ACTTGAAT	+
ATTTGCAT	V_POU3F2_02	0	0.00172957	2.14986	0.357937	8	ATTTGCAT	ATTAACATAA	-
ATTTGCAT	F_MATA1_01	0	0.00248186	3.08495	0.448585	8	ATTTGCAT	ATTTACATCA	-
ATTTGCAT	MA0328.1	0	0.00252885	3.14336	0.448585	8	ATTTGCAT	AATTACATG	-
ATTTGCAT	Pou3f3_3235.2	3	0.00334386	4.15642	0.553613	8	ATTTGCAT	AAAATATGCATAATAAA	+
TGCAAATT	V_OCT1_01	7	1.44977e-05	0.0180207	0.0146859	8	TGCAAATT	ATCAATATGCAAATTTCGG	+
TGCAAATT	Pou2f2_3748.1	5	2.2033e-05	0.027387	0.0146859	8	TGCAAATT	TTGTATGCAAATTAGA	+
TGCAAATT	Pou2f3_3986.2	5	2.2033e-05	0.027387	0.0146859	8	TGCAAATT	TTGTATGCAAATTAGA	+
TGCAAATT	V_OCT1_05	4	2.36543e-05	0.0294023	0.0146859	8	TGCAAATT	AATATGCAAATTAG	-
TGCAAATT	MA0453.1	2	3.30014e-05	0.0410208	0.0163913	8	TGCAAATT	TATGCAAATTAG	+
TGCAAATT	V_OCT1_Q6	5	0.000133696	0.166185	0.0508441	8	TGCAAATT	GAATATGCAAATCAG	+
TGCAAATT	V_OCT1_04	9	0.000149167	0.185414	0.0508441	8	TGCAAATT	ATATAATTATGCAAATTAAAAGA	+
TGCAAATT	V_OCT_C	3	0.000163787	0.203588	0.0508441	8	TGCAAATT	GTATGCAAATGAG	-
TGCAAATT	V_OCT1_07	4	0.000520748	0.64729	0.143693	8	TGCAAATT	TCTATGCTAATT	+
TGCAAATT	Mafk_secondary	3	0.00130975	1.62802	0.325265	8	TGCAAATT	CCTTGCAATTTTTTC	-
TGCAAATT	V_OCT1_02	4	0.00309884	3.85186	0.69961	8	TGCAAATT	TAAATGCATATTCAT	-
TGCAAATT	Sox7_secondary	1	0.00340257	4.2294	0.704167	8	TGCAAATT	GTGCTAATTGTGTGTGTACGCT	+
TGCAAATT	Mtf1_primary	8	0.00415124	5.15999	0.736375	8	TGCAAATT	GGGCCGTGTGCAAAAA	+
TTTGCATT	V_OCT1_Q6	4	7.45862e-05	0.0927106	0.185079	8	TTTGCATT	GTGATTTGCATATTT	-
TTTGCATT	V_OCT_C	4	0.000364596	0.453193	0.231199	8	TTTGCATT	CTCATTTGCATAC	+
TTTGCATT	MA0142.1	1	0.000433003	0.538223	0.231199	8	TTTGCATT	ATTTGCATAACAAAG	-
TTTGCATT	V_OCT1_05	4	0.000447263	0.555948	0.231199	8	TTTGCATT	ATAATTTGCATATT	+
TTTGCATT	Pou2f2_3748.1	5	0.000636394	0.791038	0.231199	8	TTTGCATT	TCTAATTTGCATACAA	-
TTTGCATT	MA0453.1	4	0.000679705	0.844873	0.231199	8	TTTGCATT	CTAATTTGCATA	-
TTTGCATT	V_OCT1_04	8	0.000688264	0.855512	0.231199	8	TTTGCATT	TCTTTTAATTTGCATAATCATAA	-
TTTGCATT	Pou2f3_3986.2	5	0.000745381	0.926509	0.231199	8	TTTGCATT	TCTAATTTGCATACAA	-
TTTGCATT	V_OCT1_01	6	0.00128239	1.59401	0.350234	8	TTTGCATT	CCGAAATTTGCATATTGAA	-
TTTGCATT	MA0244.1	0	0.00141143	1.75441	0.350234	8	TTTGCATT	TTTGCAAT	-
TTTGCATT	F_ABAA_01	3	0.00194107	2.41275	0.416173	8	TTTGCATT	CCTTCTGCATTCCTGTGCT	+
TTTGCATT	MA0045.1	3	0.00228084	2.83508	0.416173	8	TTTGCATT	GTTTTTCCATTTGTTG	-
TTTGCATT	MA0148.1	2	0.00233516	2.90261	0.416173	8	TTTGCATT	TGTTTACTTTG	+
TTTGCATT	MA0143.1	0	0.00234803	2.9186	0.416173	8	TTTGCATT	TTTGCATAACAAAGG	-
TTTGCATT	Foxk1_primary	7	0.00304793	3.78858	0.50421	8	TTTGCATT	CTGTTTGTTTACATTTT	-
TTTGCATT	Mafb_secondary	5	0.00371135	4.61321	0.575586	8	TTTGCATT	ATATTTTTGCAATTG	-
TTTGCATT	Foxl1_primary	7	0.00419807	5.2182	0.612771	8	TTTGCATT	ACCTTTGTTTACATTTA	-
TGCAAATG	V_OCT_C	3	3.79767e-06	0.00472051	0.00944101	8	TGCAAATG	GTATGCAAATGAG	-
TGCAAATG	MA0453.1	2	5.17358e-05	0.0643076	0.0381365	8	TGCAAATG	TATGCAAATTAG	+
TGCAAATG	Pou2f3_3986.2	5	5.87678e-05	0.0730483	0.0381365	8	TGCAAATG	TTGTATGCAAATTAGA	+
TGCAAATG	V_OCT1_05	4	7.24294e-05	0.0900298	0.0381365	8	TGCAAATG	AATATGCAAATTAG	-
TGCAAATG	Pou2f2_3748.1	5	7.67025e-05	0.0953412	0.0381365	8	TGCAAATG	TTGTATGCAAATTAGA	+
TGCAAATG	V_OCT1_01	7	0.00024389	0.303155	0.101052	8	TGCAAATG	ATCAATATGCAAATTTCGG	+
TGCAAATG	V_OCT1_Q6	5	0.000323266	0.40182	0.114806	8	TGCAAATG	GAATATGCAAATCAG	+
TGCAAATG	V_OCT1_04	9	0.00150662	1.87273	0.468182	8	TGCAAATG	ATATAATTATGCAAATTAAAAGA	+
TGCAAATG	Mafb_secondary	7	0.00186801	2.32194	0.515987	8	TGCAAATG	ATATTTTTGCAATTG	-
TTTGCATC	MA0142.1	1	0.000341536	0.424529	0.252356	8	TTTGCATC	ATTTGCATAACAAAG	-
TTTGCATC	MA0295.1	0	0.000343713	0.427235	0.252356	8	TTTGCATC	TTTGCGTC	-
TTTGCATC	V_OCT1_Q6	4	0.000380868	0.473419	0.252356	8	TTTGCATC	GTGATTTGCATATTT	-
TTTGCATC	V_OCT_C	4	0.000491777	0.611278	0.252356	8	TTTGCATC	CTCATTTGCATAC	+
TTTGCATC	MA0453.1	4	0.000567437	0.705324	0.252356	8	TTTGCATC	CTAATTTGCATA	-
TTTGCATC	Pou2f3_3986.2	5	0.000729824	0.907171	0.252356	8	TTTGCATC	TCTAATTTGCATACAA	-
TTTGCATC	V_OCT1_05	4	0.000784363	0.974963	0.252356	8	TTTGCATC	ATAATTTGCATATT	+
TTTGCATC	Pou2f2_3748.1	5	0.000812274	1.00966	0.252356	8	TTTGCATC	TCTAATTTGCATACAA	-
TTTGCATC	V_OCT1_01	6	0.00102107	1.26919	0.281976	8	TTTGCATC	CCGAAATTTGCATATTGAA	-
TTTGCATC	MA0143.1	0	0.00140102	1.74146	0.348212	8	TTTGCATC	TTTGCATAACAAAGG	-
TTTGCATC	F_MATA1_01	1	0.00157053	1.95217	0.354858	8	TTTGCATC	ATTTACATCA	-
TTTGCATC	V_OCT1_04	8	0.00194855	2.42204	0.403581	8	TTTGCATC	TCTTTTAATTTGCATAATCATAA	-
TATGCAAA	V_OCT1_01	5	7.60138e-07	0.000944851	0.00111769	8	TATGCAAA	ATCAATATGCAAATTTCGG	+
TATGCAAA	V_OCT_C	1	1.29664e-06	0.00161173	0.00111769	8	TATGCAAA	GTATGCAAATGAG	-
TATGCAAA	Pou2f3_3986.2	3	1.94496e-06	0.00241759	0.00111769	8	TATGCAAA	TTGTATGCAAATTAGA	+
TATGCAAA	MA0453.1	0	2.00173e-06	0.00248815	0.00111769	8	TATGCAAA	TATGCAAATTAG	+
TATGCAAA	V_OCT1_05	2	2.44004e-06	0.00303297	0.00111769	8	TATGCAAA	AATATGCAAATTAG	-
TATGCAAA	Pou2f2_3748.1	3	2.70584e-06	0.00336336	0.00111769	8	TATGCAAA	TTGTATGCAAATTAGA	+
TATGCAAA	MA0142.1	6	1.80208e-05	0.0223999	0.00638038	8	TATGCAAA	CTTTGTTATGCAAAT	+
TATGCAAA	V_OCT1_Q6	3	3.40587e-05	0.042335	0.0105513	8	TATGCAAA	GAATATGCAAATCAG	+
TATGCAAA	V_OCT1_04	7	6.81162e-05	0.0846685	0.0187576	8	TATGCAAA	ATATAATTATGCAAATTAAAAGA	+
TATGCAAA	MA0143.1	7	7.9764e-05	0.0991467	0.0197687	8	TATGCAAA	CCTTTGTTATGCAAA	+
TATGCAAA	MA0254.1	0	0.000340843	0.423668	0.0767949	6	TATGCAAA	TATGCA	+
TATGCAAA	V_OCT1_07	2	0.00054932	0.682805	0.113453	8	TATGCAAA	TCTATGCTAATT	+
TATGCAAA	Pou3f3_3235.2	5	0.000705633	0.877102	0.134526	8	TATGCAAA	TTTATTATGCATATTTT	-
TATGCAAA	MA0446.1	1	0.00134737	1.67478	0.222621	8	TATGCAAA	TTAAGCAAACA	-
TATGCAAA	V_OCT1_02	5	0.0016793	2.08737	0.25215	8	TATGCAAA	ATGAATATGCATATA	+
TATGCAAA	V_POU3F2_02	1	0.00172957	2.14986	0.25215	8	TATGCAAA	TTATGTTAAT	+
TATGCAAA	Mtf1_primary	6	0.00415124	5.15999	0.556612	8	TATGCAAA	GGGCCGTGTGCAAAAA	+
TATGCAAA	Mafb_secondary	5	0.0044318	5.50872	0.556612	8	TATGCAAA	ATATTTTTGCAATTG	-
TATGCAAA	MA0148.1	1	0.00449172	5.5832	0.556612	8	TATGCAAA	CAAAGTAAACA	-
TATGCAAA	V_CEBP_Q2	4	0.00577789	7.18192	0.681899	8	TATGCAAA	TAATTATGCAATGT	-
TGCATATC	V_OCT1_05	6	0.000214026	0.266034	0.263646	8	TGCATATC	ATAATTTGCATATT	+
TGCATATC	Pou3f3_3235.2	7	0.000271959	0.338045	0.263646	8	TGCATATC	TTTATTATGCATATTTT	-
TGCATATC	MA0254.1	0	0.000340843	0.423668	0.263646	6	TGCATATC	TGCATA	-
TGCATATC	MA0142.1	3	0.000424209	0.527292	0.263646	8	TGCATATC	ATTTGCATAACAAAG	-
TGCATATC	V_OCT1_01	8	0.000823847	1.02404	0.409617	8	TGCATATC	CCGAAATTTGCATATTGAA	-
TGCATATC	V_OCT1_02	4	0.00120914	1.50296	0.473853	8	TGCATATC	TAAATGCATATTCAT	-
TGCATATC	V_OCT1_Q6	6	0.00133426	1.65849	0.473853	8	TGCATATC	GTGATTTGCATATTT	-
TGCATATC	MA0143.1	2	0.00214977	2.67216	0.668041	8	TGCATATC	TTTGCATAACAAAGG	-
TGCATATC	Pou2f2_3748.1	7	0.00264049	3.28213	0.729362	8	TGCATATC	TCTAATTTGCATACAA	-
ATTTGCAT	V_OCT_C	3	3.80069e-07	0.000472426	0.000943869	8	ATTTGCAT	CTCATTTGCATAC	+
ATTTGCAT	V_OCT1_01	5	7.60138e-07	0.000944851	0.000943869	8	ATTTGCAT	CCGAAATTTGCATATTGAA	-
ATTTGCAT	Pou2f3_3986.2	4	1.61401e-06	0.00200622	0.000944075	8	ATTTGCAT	TCTAATTTGCATACAA	-
ATTTGCAT	V_OCT1_05	3	1.79543e-06	0.00223172	0.000944075	8	ATTTGCAT	ATAATTTGCATATT	+
ATTTGCAT	Pou2f2_3748.1	4	1.94496e-06	0.00241759	0.000944075	8	ATTTGCAT	TCTAATTTGCATACAA	-
ATTTGCAT	MA0453.1	3	2.28091e-06	0.00283517	0.000944075	8	ATTTGCAT	CTAATTTGCATA	-
ATTTGCAT	V_OCT1_Q6	3	3.64945e-06	0.00453627	0.00129473	8	ATTTGCAT	GTGATTTGCATATTT	-
ATTTGCAT	MA0142.1	0	5.81474e-06	0.00722772	0.00180505	8	ATTTGCAT	ATTTGCATAACAAAG	-
ATTTGCAT	V_OCT1_04	7	3.60413e-05	0.0447993	0.00994506	8	ATTTGCAT	TCTTTTAATTTGCATAATCATAA	-
ATTTGCAT	V_OCT1_07	1	0.000520748	0.64729	0.129323	8	ATTTGCAT	AATTAGCATACA	-
ATTTGCAT	MA0274.1	0	0.000798292	0.992277	0.180226	8	ATTTGCAT	ACTTGAAT	+
ATTTGCAT	V_POU3F2_02	0	0.00172957	2.14986	0.357937	8	ATTTGCAT	ATTAACATAA	-
ATTTGCAT	F_MATA1_01	0	0.00248186	3.08495	0.448585	8	ATTTGCAT	ATTTACATCA	-
ATTTGCAT	MA0328.1	0	0.00252885	3.14336	0.448585	8	ATTTGCAT	AATTACATG	-
ATTTGCAT	Pou3f3_3235.2	3	0.00334386	4.15642	0.553613	8	ATTTGCAT	AAAATATGCATAATAAA	+
GCAAATCT	MA0121.1	0	0.000310823	0.386354	0.63369	8	GCAAATCT	GCGGATCT	-
GCAAATCT	V_OCT1_01	8	0.000509807	0.63369	0.63369	8	GCAAATCT	ATCAATATGCAAATTTCGG	+
ATGCAAAT	V_OCT_C	2	3.80069e-07	0.000472426	0.000943869	8	ATGCAAAT	GTATGCAAATGAG	-
ATGCAAAT	V_OCT1_01	6	7.60138e-07	0.000944851	0.000943869	8	ATGCAAAT	ATCAATATGCAAATTTCGG	+
ATGCAAAT	Pou2f3_3986.2	4	1.61401e-06	0.00200622	0.000944075	8	ATGCAAAT	TTGTATGCAAATTAGA	+
ATGCAAAT	V_OCT1_05	3	1.79543e-06	0.00223172	0.000944075	8	ATGCAAAT	AATATGCAAATTAG	-
ATGCAAAT	Pou2f2_3748.1	4	1.94496e-06	0.00241759	0.000944075	8	ATGCAAAT	TTGTATGCAAATTAGA	+
ATGCAAAT	MA0453.1	1	2.28091e-06	0.00283517	0.000944075	8	ATGCAAAT	TATGCAAATTAG	+
ATGCAAAT	V_OCT1_Q6	4	3.64945e-06	0.00453627	0.00129473	8	ATGCAAAT	GAATATGCAAATCAG	+
ATGCAAAT	MA0142.1	7	5.81474e-06	0.00722772	0.00180505	8	ATGCAAAT	CTTTGTTATGCAAAT	+
ATGCAAAT	V_OCT1_04	8	3.60413e-05	0.0447993	0.00994506	8	ATGCAAAT	ATATAATTATGCAAATTAAAAGA	+
ATGCAAAT	V_OCT1_07	3	0.000520748	0.64729	0.129323	8	ATGCAAAT	TCTATGCTAATT	+
ATGCAAAT	MA0274.1	0	0.000798292	0.992277	0.180226	8	ATGCAAAT	ATTCAAGT	-
ATGCAAAT	V_POU3F2_02	2	0.00172957	2.14986	0.357937	8	ATGCAAAT	TTATGTTAAT	+
ATGCAAAT	F_MATA1_01	2	0.00248186	3.08495	0.448585	8	ATGCAAAT	TGATGTAAAT	+
ATGCAAAT	MA0328.1	1	0.00252885	3.14336	0.448585	8	ATGCAAAT	CATGTAATT	+
ATGCAAAT	Pou3f3_3235.2	6	0.00334386	4.15642	0.553613	8	ATGCAAAT	TTTATTATGCATATTTT	-
TTGCATAG	Pou2f2_3748.1	6	0.000274562	0.341281	0.259738	8	TTGCATAG	TCTAATTTGCATACAA	-
TTGCATAG	Pou2f3_3986.2	6	0.000290563	0.36117	0.259738	8	TTGCATAG	TCTAATTTGCATACAA	-
TTGCATAG	MA0254.1	-1	0.000375808	0.467129	0.259738	6	TTGCATAG	TGCATA	-
TTGCATAG	V_OCT_C	5	0.000418018	0.519596	0.259738	8	TTGCATAG	CTCATTTGCATAC	+
TTGCATAG	V_OCT1_Q6	5	0.000724082	0.900033	0.341513	8	TTGCATAG	GTGATTTGCATATTT	-
TTGCATAG	V_OCT1_01	7	0.00086899	1.08016	0.341513	8	TTGCATAG	CCGAAATTTGCATATTGAA	-
TTGCATAG	V_OCT1_05	5	0.000961844	1.19557	0.341513	8	TTGCATAG	ATAATTTGCATATT	+
TTGCATAG	V_OCT1_04	9	0.00215424	2.67772	0.621856	8	TTGCATAG	TCTTTTAATTTGCATAATCATAA	-
TTGCATAG	MA0142.1	2	0.00225181	2.799	0.621856	8	TTGCATAG	ATTTGCATAACAAAG	-
TTGCATAG	V_OCT1_07	3	0.0027206	3.38171	0.676186	8	TTGCATAG	AATTAGCATACA	-
TAACAATG	MA0087.1	0	6.34293e-05	0.0788427	0.096451	7	TAACAATG	AAACAAT	+
TAACAATG	MA0143.1	6	0.000125582	0.156098	0.096451	8	TAACAATG	TTTGCATAACAAAGG	-
TAACAATG	MA0077.1	0	0.00014823	0.18425	0.096451	8	TAACAATG	GAACAATGG	+
TAACAATG	V_SOX5_01	1	0.000155667	0.193494	0.096451	8	TAACAATG	TTAACAATAC	+
TAACAATG	F_MAT1MC_02	0	0.000194827	0.242169	0.0965713	8	TAACAATG	AAACAATGGA	-
TAACAATG	V_SOX9_B1	3	0.000285201	0.354505	0.117807	8	TAACAATG	TAAGAACAATGGGA	+
TAACAATG	MA0442.1	-2	0.000363653	0.452021	0.124874	6	TAACAATG	ACAAAG	-
TAACAATG	MA0142.1	7	0.000430312	0.534877	0.124874	8	TAACAATG	ATTTGCATAACAAAG	-
TAACAATG	MA00445.1	1	0.000463949	0.576688	0.124874	8	TAACAATG	AGAACAATGGA	-
TAACAATG	MA0217.1	0	0.000503849	0.626284	0.124874	5	TAACAATG	TAACA	+
TAACAATG	Sox1_secondary	3	0.000626777	0.779084	0.141218	8	TAACAATG	CGATAACAATTATAG	-
TAACAATG	Sox30_primary	3	0.000703615	0.874594	0.14532	8	TAACAATG	ATTGAACAATGGAATT	+
TAACAATG	MA0371.1	2	0.00117425	1.4596	0.223866	8	TAACAATG	GAGAACAATGGA	-
TAACAATG	Sox18_primary	5	0.00178209	2.21513	0.308778	8	TAACAATG	TTTTAGAACAATTGAA	-
TAACAATG	Sox12_primary	5	0.00186882	2.32294	0.308778	8	TAACAATG	GTTTAGAACAATTA	-
TAACAATG	V_SRY_02	2	0.00206858	2.57125	0.320422	8	TAACAATG	GTAAACAATAGA	+
TAACAATG	MA0233.1	0	0.00318364	3.95726	0.464135	5	TAACAATG	AAACA	+
TAACAATG	MA0210.1	0	0.003378	4.19885	0.465111	5	TAACAATG	TAACA	+
TAACAATG	Sox11_primary	4	0.00477868	5.9399	0.588438	8	TAACAATG	ATAAGAACAAAGGACTA	+
TAACAATG	Foxa2_secondary	5	0.00481169	5.98092	0.588438	8	TAACAATG	AAAAATAACAAACGG	+
TAACAATG	Sox11_secondary	4	0.00526484	6.5442	0.588438	8	TAACAATG	TTCATAACAATTTT	-
TAACAATG	Hbp1_secondary	3	0.00545423	6.77961	0.588438	8	TAACAATG	AGTACACAATGGGAACA	-
TAACAATG	Sox7_primary	6	0.00565796	7.03285	0.588438	8	TAACAATG	AATAAAGAACAATAGAATTTCA	+
TAACAATG	Sox8_primary	4	0.00569825	7.08293	0.588438	8	TAACAATG	TAAAGAACAATAGATAA	-
TAACAATG	Sox4_primary	4	0.00707003	8.78804	0.700892	8	TAACAATG	AGAAGAACAAAGGACTA	+
TAACAATG	Sox4_secondary	4	0.00769591	9.56601	0.715436	8	TAACAATG	TTCCTAACAATTTTTCC	-
TAACAATG	MA0231.1	0	0.00809854	10.0665	0.715436	6	TAACAATG	TAACTA	+
TAACAATG	MA0040.1	3	0.00818204	10.1703	0.715436	8	TAACAATG	AATAAACAATA	-
TAACAATG	Sox15_primary	4	0.00837142	10.4057	0.715436	8	TAACAATG	TAGTGAACAATAGATTT	+
TTGTTATG	MA0143.1	3	1.65619e-05	0.0205865	0.0390833	8	TTGTTATG	CCTTTGTTATGCAAA	+
TTGTTATG	MA0142.1	2	3.15649e-05	0.0392351	0.0390833	8	TTGTTATG	CTTTGTTATGCAAAT	+
TTGTTATG	Foxj1_secondary	3	0.000259073	0.322027	0.213854	8	TTGTTATG	GTGTTGTTGTGACAT	-
TTGTTATG	MA0217.1	-1	0.00041898	0.520792	0.226628	5	TTGTTATG	TGTTA	-
TTGTTATG	Foxl1_secondary	4	0.000457578	0.56877	0.226628	8	TTGTTATG	TGTTTTGTTTTGATAT	-
TTGTTATG	Sox11_secondary	4	0.000795152	0.988374	0.306519	8	TTGTTATG	AAAATTGTTATGAA	+
TTGTTATG	Foxj3_secondary	4	0.000866439	1.07698	0.306519	8	TTGTTATG	TCCTTTGTTTTGGTGTT	-
TTGTTATG	Foxa2_secondary	4	0.00143998	1.7899	0.416409	8	TTGTTATG	CCGTTTGTTATTTTT	-
TTGTTATG	Sox1_secondary	6	0.00151337	1.88112	0.416409	8	TTGTTATG	CTATAATTGTTATCG	+
TTGTTATG	Sox12_primary	3	0.00225633	2.80461	0.456878	8	TTGTTATG	TAATTGTTCTAAAC	+
TTGTTATG	MA0127.1	2	0.00244156	3.03486	0.456878	8	TTGTTATG	ACTTCTTATT	+
TTGTTATG	Rfx4_primary	4	0.00256387	3.18688	0.456878	8	TTGTTATG	ACCGTTGCTATGGTA	-
TTGTTATG	MA0233.1	-1	0.00300122	3.73052	0.456878	5	TTGTTATG	TGTTT	-
TTGTTATG	MA0049.1	1	0.00317052	3.94096	0.456878	8	TTGTTATG	TTTTTTATGC	-
TTGTTATG	I_HB_01	1	0.00317052	3.94096	0.456878	8	TTGTTATG	TTTTTTATGC	-
TTGTTATG	MA0210.1	-1	0.00318955	3.96461	0.456878	5	TTGTTATG	TGTTA	-
TTGTTATG	Rfxdc2_primary	4	0.00322519	4.00891	0.456878	8	TTGTTATG	TCCGTTGCTATGCGG	-
TTGTTATG	Sox8_primary	7	0.00332901	4.13796	0.456878	8	TTGTTATG	TTATCTATTGTTCTTTA	+
TTGTTATG	V_SRY_02	4	0.00353443	4.39329	0.456878	8	TTGTTATG	TCTATTGTTTAC	-
TTGTTATG	MA0084.1	1	0.00378737	4.7077	0.456878	8	TTGTTATG	ATTGTTTAC	-
TTGTTATG	Sox4_secondary	7	0.00399552	4.96643	0.456878	8	TTGTTATG	GGAAAAATTGTTAGGAA	+
TTGTTATG	V_SOX9_B1	5	0.00405887	5.04518	0.456878	8	TTGTTATG	TCCCATTGTTCTTA	-
TTGTTATG	Foxk1_secondary	5	0.00547967	6.81123	0.579986	8	TTGTTATG	AGGTGTTGTTGTTTG	-
TTGTTATG	Sox18_primary	5	0.00562096	6.98686	0.579986	8	TTGTTATG	TTCAATTGTTCTAAAA	+
TTGTTATG	V_FAC1_01	3	0.00623827	7.75417	0.617934	8	TTGTTATG	TATGTGTTGTGGGT	-
TTGTTATG	MA0371.1	4	0.00782964	9.73225	0.730664	8	TTGTTATG	CCCATTGTTCTC	+
TTGTTATG	MA0231.1	0	0.00796644	9.90228	0.730664	6	TTGTTATG	TAGTTA	-
TATGCAAA	V_OCT1_01	5	7.60138e-07	0.000944851	0.00111769	8	TATGCAAA	ATCAATATGCAAATTTCGG	+
TATGCAAA	V_OCT_C	1	1.29664e-06	0.00161173	0.00111769	8	TATGCAAA	GTATGCAAATGAG	-
TATGCAAA	Pou2f3_3986.2	3	1.94496e-06	0.00241759	0.00111769	8	TATGCAAA	TTGTATGCAAATTAGA	+
TATGCAAA	MA0453.1	0	2.00173e-06	0.00248815	0.00111769	8	TATGCAAA	TATGCAAATTAG	+
TATGCAAA	V_OCT1_05	2	2.44004e-06	0.00303297	0.00111769	8	TATGCAAA	AATATGCAAATTAG	-
TATGCAAA	Pou2f2_3748.1	3	2.70584e-06	0.00336336	0.00111769	8	TATGCAAA	TTGTATGCAAATTAGA	+
TATGCAAA	MA0142.1	6	1.80208e-05	0.0223999	0.00638038	8	TATGCAAA	CTTTGTTATGCAAAT	+
TATGCAAA	V_OCT1_Q6	3	3.40587e-05	0.042335	0.0105513	8	TATGCAAA	GAATATGCAAATCAG	+
TATGCAAA	V_OCT1_04	7	6.81162e-05	0.0846685	0.0187576	8	TATGCAAA	ATATAATTATGCAAATTAAAAGA	+
TATGCAAA	MA0143.1	7	7.9764e-05	0.0991467	0.0197687	8	TATGCAAA	CCTTTGTTATGCAAA	+
TATGCAAA	MA0254.1	0	0.000340843	0.423668	0.0767949	6	TATGCAAA	TATGCA	+
TATGCAAA	V_OCT1_07	2	0.00054932	0.682805	0.113453	8	TATGCAAA	TCTATGCTAATT	+
TATGCAAA	Pou3f3_3235.2	5	0.000705633	0.877102	0.134526	8	TATGCAAA	TTTATTATGCATATTTT	-
TATGCAAA	MA0446.1	1	0.00134737	1.67478	0.222621	8	TATGCAAA	TTAAGCAAACA	-
TATGCAAA	V_OCT1_02	5	0.0016793	2.08737	0.25215	8	TATGCAAA	ATGAATATGCATATA	+
TATGCAAA	V_POU3F2_02	1	0.00172957	2.14986	0.25215	8	TATGCAAA	TTATGTTAAT	+
TATGCAAA	Mtf1_primary	6	0.00415124	5.15999	0.556612	8	TATGCAAA	GGGCCGTGTGCAAAAA	+
TATGCAAA	Mafb_secondary	5	0.0044318	5.50872	0.556612	8	TATGCAAA	ATATTTTTGCAATTG	-
TATGCAAA	MA0148.1	1	0.00449172	5.5832	0.556612	8	TATGCAAA	CAAAGTAAACA	-
TATGCAAA	V_CEBP_Q2	4	0.00577789	7.18192	0.681899	8	TATGCAAA	TAATTATGCAATGT	-
TGCATAAC	MA0142.1	3	2.76511e-05	0.0343703	0.0343207	8	TGCATAAC	ATTTGCATAACAAAG	-
TGCATAAC	MA0143.1	2	2.76511e-05	0.0343703	0.0343207	8	TGCATAAC	TTTGCATAACAAAGG	-
TGCATAAC	MA0254.1	0	0.000340843	0.423668	0.262313	6	TGCATAAC	TGCATA	-
TGCATAAC	Pou3f3_3235.2	7	0.000449508	0.558738	0.262313	8	TGCATAAC	TTTATTATGCATATTTT	-
TGCATAAC	V_CEBPB_02	4	0.00149445	1.85761	0.574199	8	TGCATAAC	ATATTGCGCAACTC	+
TGCATAAC	V_E4BP4_01	3	0.00190057	2.36241	0.574199	8	TGCATAAC	CGTTACATAACG	-
TGCATAAC	Pou2f2_3748.1	7	0.00190335	2.36586	0.574199	8	TGCATAAC	TCTAATTTGCATACAA	-
TGCATAAC	Pou2f3_3986.2	7	0.00219313	2.72605	0.574199	8	TGCATAAC	TCTAATTTGCATACAA	-
TGCATAAC	MA0043.1	3	0.00271454	3.37417	0.574199	8	TGCATAAC	TATTACGTAACC	-
TGCATAAC	V_OCT1_01	8	0.0027655	3.43752	0.574199	8	TGCATAAC	CCGAAATTTGCATATTGAA	-
TGCATAAC	V_HLF_01	2	0.00277568	3.45017	0.574199	8	TGCATAAC	ATTACGTAAC	-
TGCATAAC	V_CEBPB_01	4	0.00340512	4.23256	0.602068	8	TGCATAAC	ACATTGCACAATCT	-
TGCATAAC	V_CEBP_Q2	4	0.00371584	4.61879	0.602068	8	TGCATAAC	ACATTGCGTAATTA	+
TGCATAAC	V_OCT1_04	10	0.00383723	4.76968	0.602068	8	TGCATAAC	TCTTTTAATTTGCATAATCATAA	-
TGCATAAC	V_OCT1_05	6	0.00388054	4.82351	0.602068	8	TGCATAAC	ATAATTTGCATATT	+
ATAACAAT	MA0087.1	-1	5.30231e-05	0.0659077	0.107001	7	ATAACAAT	AAACAAT	+
ATAACAAT	Sox1_secondary	2	9.95838e-05	0.123783	0.107001	8	ATAACAAT	CGATAACAATTATAG	-
ATAACAAT	MA0143.1	5	0.000129943	0.161519	0.107001	8	ATAACAAT	TTTGCATAACAAAGG	-
ATAACAAT	Sox12_primary	4	0.000200055	0.248668	0.107618	8	ATAACAAT	GTTTAGAACAATTA	-
ATAACAAT	MA00445.1	0	0.000346281	0.430428	0.107618	8	ATAACAAT	AGAACAATGGA	-
ATAACAAT	MA0142.1	6	0.000390061	0.484845	0.107618	8	ATAACAAT	ATTTGCATAACAAAG	-
ATAACAAT	Sox18_primary	4	0.000390485	0.485373	0.107618	8	ATAACAAT	TTTTAGAACAATTGAA	-
ATAACAAT	MA0217.1	-1	0.00041898	0.520792	0.107618	5	ATAACAAT	TAACA	+
ATAACAAT	V_SOX5_01	0	0.0004495	0.558728	0.107618	8	ATAACAAT	TTAACAATAC	+
ATAACAAT	MA0084.1	1	0.000453025	0.56311	0.107618	8	ATAACAAT	GTAAACAAT	+
ATAACAAT	Sox11_secondary	3	0.0004792	0.595646	0.107618	8	ATAACAAT	TTCATAACAATTTT	-
ATAACAAT	V_SOX9_B1	2	0.000564268	0.701385	0.116162	8	ATAACAAT	TAAGAACAATGGGA	+
ATAACAAT	Sox8_primary	3	0.00068057	0.845948	0.121733	8	ATAACAAT	TAAAGAACAATAGATAA	-
ATAACAAT	V_SRY_02	1	0.000689884	0.857526	0.121733	8	ATAACAAT	GTAAACAATAGA	+
ATAACAAT	MA0371.1	1	0.000850774	1.05751	0.140114	8	ATAACAAT	GAGAACAATGGA	-
ATAACAAT	Sox13_primary	3	0.00109816	1.36501	0.169552	8	ATAACAAT	TTAAGAACAATAATTT	+
ATAACAAT	Foxa2_secondary	4	0.00140669	1.74852	0.202372	8	ATAACAAT	AAAAATAACAAACGG	+
ATAACAAT	Sox7_primary	5	0.00147457	1.83289	0.202372	8	ATAACAAT	AATAAAGAACAATAGAATTTCA	+
ATAACAAT	Sox15_primary	3	0.00165851	2.06152	0.215637	8	ATAACAAT	TAGTGAACAATAGATTT	+
ATAACAAT	Sox5_primary	3	0.00174694	2.17145	0.215778	8	ATAACAAT	TTTAGAACAATAAAAT	+
ATAACAAT	Sox4_secondary	3	0.00214032	2.66042	0.24104	8	ATAACAAT	TTCCTAACAATTTTTCC	-
ATAACAAT	Sox17_primary	1	0.00220751	2.74393	0.24104	8	ATAACAAT	ATAAACAATTAATCA	+
ATAACAAT	V_FOXJ2_02	0	0.00224418	2.78952	0.24104	8	ATAACAAT	ATAATAATATTTTT	+
ATAACAAT	MA0233.1	-1	0.00300122	3.73052	0.30305	5	ATAACAAT	AAACA	+
ATAACAAT	Zfp105_primary	5	0.00307664	3.82427	0.30305	8	ATAACAAT	AACAAACAACAAGAG	+
ATAACAAT	MA0210.1	-1	0.00318955	3.96461	0.30305	5	ATAACAAT	TAACA	+
ATAACAAT	Sox30_primary	2	0.00360667	4.48309	0.326262	8	ATAACAAT	ATTGAACAATGGAATT	+
ATAACAAT	Foxj1_secondary	5	0.00369799	4.5966	0.326262	8	ATAACAAT	ATGTCACAACAACAC	+
ATAACAAT	Gata6_primary	7	0.00572388	7.11478	0.472209	8	ATAACAAT	TATAGAGATAAGAATTG	+
ATAACAAT	N_SKN1_01	3	0.00573452	7.128	0.472209	8	ATAACAAT	TGGATGACATTA	-
ATAACAAT	Foxl1_secondary	5	0.00672534	8.3596	0.535934	8	ATAACAAT	ATATCAAAACAAAACA	+
ATAACAAT	Foxj3_secondary	6	0.00743333	9.23962	0.56908	8	ATAACAAT	AACACCAAAACAAAGGA	+
ATAACAAT	MA0231.1	-1	0.00760202	9.44931	0.56908	6	ATAACAAT	TAACTA	+
ATAACAAT	MA0127.1	1	0.00980121	12.1829	0.712131	8	ATAACAAT	AATAAGAAGT	-
TGTTATGC	MA0143.1	4	1.74741e-05	0.0217204	0.0295692	8	TGTTATGC	CCTTTGTTATGCAAA	+
TGTTATGC	MA0142.1	3	2.38133e-05	0.0296	0.0295692	8	TGTTATGC	CTTTGTTATGCAAAT	+
TGTTATGC	MA0217.1	0	0.000503849	0.626284	0.417089	5	TGTTATGC	TGTTA	-
ATGCAAAA	MA0453.1	1	0.000444551	0.552576	0.309187	8	ATGCAAAA	TATGCAAATTAG	+
ATGCAAAA	MA0142.1	7	0.000537686	0.668344	0.309187	8	ATGCAAAA	CTTTGTTATGCAAAT	+
ATGCAAAA	V_OCT_C	2	0.000689995	0.857664	0.309187	8	ATGCAAAA	GTATGCAAATGAG	-
ATGCAAAA	V_OCT1_Q6	4	0.0010667	1.32591	0.309187	8	ATGCAAAA	GAATATGCAAATCAG	+
ATGCAAAA	V_OCT1_05	3	0.00109473	1.36075	0.309187	8	ATGCAAAA	AATATGCAAATTAG	-
ATGCAAAA	V_OCT1_01	6	0.00109625	1.36264	0.309187	8	ATGCAAAA	ATCAATATGCAAATTTCGG	+
ATGCAAAA	Mafb_secondary	3	0.00112352	1.39653	0.309187	8	ATGCAAAA	CAATTGCAAAAATAT	+
ATGCAAAA	Pou2f2_3748.1	4	0.00119567	1.48621	0.309187	8	ATGCAAAA	TTGTATGCAAATTAGA	+
ATGCAAAA	Pou2f3_3986.2	4	0.00119567	1.48621	0.309187	8	ATGCAAAA	TTGTATGCAAATTAGA	+
ATGCAAAA	V_OCT1_04	8	0.00124501	1.54754	0.309187	8	ATGCAAAA	ATATAATTATGCAAATTAAAAGA	+
ATGCAAAA	Pou3f3_3235.2	5	0.00146846	1.8253	0.313979	8	ATGCAAAA	AAAATATGCATAATAAA	+
ATGCAAAA	MA0152.1	-1	0.00151716	1.88583	0.313979	7	ATGCAAAA	TGGAAAA	-
ATGCAAAA	V_BRN2_01	3	0.00262847	3.26719	0.502122	8	ATGCAAAA	GCCATCCAAAATGAAC	+
ATGCAAAA	I_ELF1_01	0	0.00331281	4.11783	0.58765	8	ATGCAAAA	ATACAAAACCATAACA	-
ATGCAAAA	MA0045.1	6	0.00362806	4.50968	0.600666	8	ATGCAAAA	CAACAAATGGAAAAAC	+
TTGCATAT	V_OCT1_05	5	9.29406e-06	0.0115525	0.0163498	8	TTGCATAT	ATAATTTGCATATT	+
TTGCATAT	V_OCT1_01	7	1.31619e-05	0.0163602	0.0163498	8	TTGCATAT	CCGAAATTTGCATATTGAA	-
TTGCATAT	V_OCT_C	5	5.59401e-05	0.0695336	0.0463263	8	TTGCATAT	CTCATTTGCATAC	+
TTGCATAT	Pou2f2_3748.1	6	0.000170205	0.211565	0.079991	8	TTGCATAT	TCTAATTTGCATACAA	-
TTGCATAT	V_OCT1_Q6	5	0.00017098	0.212528	0.079991	8	TTGCATAT	GTGATTTGCATATTT	-
TTGCATAT	V_OCT1_02	3	0.000193182	0.240125	0.079991	8	TTGCATAT	TAAATGCATATTCAT	-
TTGCATAT	Pou2f3_3986.2	6	0.000260075	0.323273	0.092305	8	TTGCATAT	TCTAATTTGCATACAA	-
TTGCATAT	MA0254.1	-1	0.000340843	0.423668	0.10585	6	TTGCATAT	TGCATA	-
TTGCATAT	MA0142.1	2	0.000537686	0.668344	0.148427	8	TTGCATAT	ATTTGCATAACAAAG	-
TTGCATAT	V_OCT1_04	9	0.000905504	1.12554	0.224965	8	TTGCATAT	TCTTTTAATTTGCATAATCATAA	-
TTGCATAT	MA0019.1	4	0.00157917	1.96291	0.356666	8	TTGCATAT	GGGATTGCATCT	-
TTGCATAT	V_CHOP_01	5	0.00187309	2.32826	0.387796	8	TTGCATAT	GGGGATTGCATCT	-
TTGCATAT	MA0249.1	0	0.00239054	2.97144	0.456854	8	TTGCATAT	TCGCATATGTTG	+
ATTTGCAT	V_OCT_C	3	3.80069e-07	0.000472426	0.000943869	8	ATTTGCAT	CTCATTTGCATAC	+
ATTTGCAT	V_OCT1_01	5	7.60138e-07	0.000944851	0.000943869	8	ATTTGCAT	CCGAAATTTGCATATTGAA	-
ATTTGCAT	Pou2f3_3986.2	4	1.61401e-06	0.00200622	0.000944075	8	ATTTGCAT	TCTAATTTGCATACAA	-
ATTTGCAT	V_OCT1_05	3	1.79543e-06	0.00223172	0.000944075	8	ATTTGCAT	ATAATTTGCATATT	+
ATTTGCAT	Pou2f2_3748.1	4	1.94496e-06	0.00241759	0.000944075	8	ATTTGCAT	TCTAATTTGCATACAA	-
ATTTGCAT	MA0453.1	3	2.28091e-06	0.00283517	0.000944075	8	ATTTGCAT	CTAATTTGCATA	-
ATTTGCAT	V_OCT1_Q6	3	3.64945e-06	0.00453627	0.00129473	8	ATTTGCAT	GTGATTTGCATATTT	-
ATTTGCAT	MA0142.1	0	5.81474e-06	0.00722772	0.00180505	8	ATTTGCAT	ATTTGCATAACAAAG	-
ATTTGCAT	V_OCT1_04	7	3.60413e-05	0.0447993	0.00994506	8	ATTTGCAT	TCTTTTAATTTGCATAATCATAA	-
ATTTGCAT	V_OCT1_07	1	0.000520748	0.64729	0.129323	8	ATTTGCAT	AATTAGCATACA	-
ATTTGCAT	MA0274.1	0	0.000798292	0.992277	0.180226	8	ATTTGCAT	ACTTGAAT	+
ATTTGCAT	V_POU3F2_02	0	0.00172957	2.14986	0.357937	8	ATTTGCAT	ATTAACATAA	-
ATTTGCAT	F_MATA1_01	0	0.00248186	3.08495	0.448585	8	ATTTGCAT	ATTTACATCA	-
ATTTGCAT	MA0328.1	0	0.00252885	3.14336	0.448585	8	ATTTGCAT	AATTACATG	-
ATTTGCAT	Pou3f3_3235.2	3	0.00334386	4.15642	0.553613	8	ATTTGCAT	AAAATATGCATAATAAA	+
GCAAATGC	V_OCT1_05	5	0.000407518	0.506545	0.626899	8	GCAAATGC	AATATGCAAATTAG	-
GCAAATGC	V_OCT_C	4	0.000536591	0.666982	0.626899	8	GCAAATGC	GTATGCAAATGAG	-
GCAAATGC	Pou2f3_3986.2	6	0.000756515	0.940348	0.626899	8	GCAAATGC	TTGTATGCAAATTAGA	+
GCAAATGC	Pou2f2_3748.1	6	0.00137661	1.71112	0.68574	8	GCAAATGC	TTGTATGCAAATTAGA	+
GCAAATGC	MA0453.1	3	0.0013792	1.71435	0.68574	8	GCAAATGC	TATGCAAATTAG	+
AGGTCAAA	MA0115.1	2	2.17984e-07	0.000270954	0.000539373	8	AGGTCAAA	AAAGGTCAAAGGTCAAC	+
AGGTCAAA	V_PPARA_01	7	1.88458e-05	0.0234253	0.0233158	8	AGGTCAAA	CAAAACTAGGTCAAAGGTCA	+
AGGTCAAA	V_PPARG_01	4	3.30883e-05	0.0411288	0.0272909	8	AGGTCAAA	TCAGGGGTCAAAGGTCATCCG	+
AGGTCAAA	V_PPARG_03	4	0.000117435	0.145972	0.0726448	8	AGGTCAAA	AACTAGGGCAAAGGTCA	+
AGGTCAAA	V_HNF4_01_B	1	0.000206896	0.257172	0.102388	8	AGGTCAAA	GGGGGCAAAGGTCAC	+
AGGTCAAA	I_dTCF_1	1	0.000270844	0.336658	0.111695	8	AGGTCAAA	AAGATCAAAGG	-
AGGTCAAA	MA0114.1	0	0.000378593	0.470591	0.133826	8	AGGTCAAA	AGGCCAAAGGTCA	+
AGGTCAAA	MA0459.1	2	0.000437458	0.54376	0.135304	8	AGGTCAAA	AAAAGTCAAA	+
AGGTCAAA	V_HNF4_01	3	0.000634878	0.789154	0.174547	8	AGGTCAAA	ACAGGGTCAAAGGTCAAGA	+
AGGTCAAA	Nr2f2_primary	6	0.000733445	0.911672	0.176447	8	AGGTCAAA	TCTCAAAGGTCACGAG	+
AGGTCAAA	V_ER_Q6	2	0.000784407	0.975018	0.176447	8	AGGTCAAA	TCAGGTCACAGTGACCTGA	-
AGGTCAAA	MA0065.2	2	0.00110043	1.36783	0.193537	8	AGGTCAAA	GTAGGGCAAAGGTCA	+
AGGTCAAA	MA0017.1	1	0.00112376	1.39684	0.193537	8	AGGTCAAA	AGGTTCAAAGGTCA	-
AGGTCAAA	V_COUP_01	1	0.00112376	1.39684	0.193537	8	AGGTCAAA	AGGTTCAAAGGTCA	-
AGGTCAAA	Esrra_primary	6	0.00117325	1.45835	0.193537	8	AGGTCAAA	TATTCAAGGTCATGCGA	+
AGGTCAAA	Lef1_primary	3	0.00150821	1.8747	0.233242	8	AGGTCAAA	GATAGATCAAAGGGATT	-
AGGTCAAA	MA0408.1	0	0.00184292	2.29075	0.26824	8	AGGTCAAA	CTGTCAAA	+
AGGTCAAA	Tcf7l2_primary	3	0.00232696	2.89242	0.319876	8	AGGTCAAA	TATAGATCAAAGGAAAT	-
AGGTCAAA	Tcf7_primary	3	0.00280339	3.48461	0.365085	8	AGGTCAAA	TATAGATCAAAGGAAAA	+
AGGTCAAA	V_ARP1_01	2	0.00318317	3.95668	0.378951	8	AGGTCAAA	AGGGGTCAAGGGCTCA	-
AGGTCAAA	Tcf3_primary	3	0.00321616	3.99769	0.378951	8	AGGTCAAA	TATAGATCAAAGGAAAA	+
AGGTCAAA	Rara_primary	6	0.00364205	4.52707	0.409627	8	AGGTCAAA	TCTCAAAGGTCACCTG	+
AGGTCAAA	Esrra_secondary	6	0.00440153	5.47111	0.454984	8	AGGTCAAA	GGCGAGGGGTCAAGGGC	+
AGGTCAAA	MA0258.1	1	0.00441309	5.48547	0.454984	8	AGGTCAAA	CAGGTCACCGTGACCTTG	-
AGGTCAAA	MA0074.1	0	0.00677924	8.4266	0.649202	8	AGGTCAAA	GGGTCAACGAGTTCA	+
AGGTCAAA	V_PPARG_02	4	0.0069223	8.60442	0.649202	8	AGGTCAAA	AAGTAGGTCACGGTGACCTACTT	+
AGGTCAAA	V_GCNF_01	4	0.00711523	8.84424	0.649202	8	AGGTCAAA	CTCAAGTTCAAGTTCACC	+
AGGTCAAA	MA0066.1	2	0.00734637	9.13154	0.649202	8	AGGTCAAA	GTAGGTCACGGTGACCTACT	+
AGGTCAAA	Hnf4a_primary	6	0.00769191	9.56104	0.656298	8	AGGTCAAA	CTTCAGGGGTCAATTGA	+
TGACCTTC	MA0141.1	0	9.13311e-05	0.113525	0.144168	8	TGACCTTC	TGACCTTGAGCT	-
TGACCTTC	MA0071.1	0	0.000116814	0.1452	0.144168	8	TGACCTTC	TGACCTTGAT	-
TGACCTTC	V_RORA1_01	1	0.000228286	0.283759	0.167263	8	TGACCTTC	ATGACCTTGATAT	-
TGACCTTC	Esrra_primary	5	0.000271053	0.336918	0.167263	8	TGACCTTC	TCGCATGACCTTGAATA	-
TGACCTTC	Rara_primary	4	0.00044461	0.552651	0.173864	8	TGACCTTC	CAGGTGACCTTTGAGA	-
TGACCTTC	Nr2f2_primary	4	0.000469585	0.583694	0.173864	8	TGACCTTC	CTCGTGACCTTTGAGA	-
TGACCTTC	MA0115.1	2	0.000493064	0.612879	0.173864	8	TGACCTTC	GTTGACCTTTGACCTTT	-
TGACCTTC	V_PPARG_01	4	0.000725276	0.901518	0.219365	8	TGACCTTC	CGGGTGACCTTTGACCCCTGA	-
TGACCTTC	V_PPARG_03	0	0.000799843	0.994204	0.219365	8	TGACCTTC	TGACCTTTGCCCTAGTT	-
TGACCTTC	MA0258.1	10	0.00119226	1.48198	0.22626	8	TGACCTTC	CAGGTCACCGTGACCTTG	-
TGACCTTC	MA0440.1	2	0.001359	1.68923	0.22626	8	TGACCTTC	CATGACCTTTAAGGT	-
TGACCTTC	MA0066.1	12	0.00140399	1.74516	0.22626	8	TGACCTTC	AGTAGGTCACCGTGACCTAC	-
TGACCTTC	V_PPARA_01	0	0.00140399	1.74516	0.22626	8	TGACCTTC	TGACCTTTGACCTAGTTTTG	-
TGACCTTC	V_HNF4_01_B	1	0.00142542	1.7718	0.22626	8	TGACCTTC	GTGACCTTTGACCCC	-
TGACCTTC	V_PPARG_02	13	0.00155728	1.9357	0.22626	8	TGACCTTC	AAGTAGGTCACCGTGACCTACTT	-
TGACCTTC	MA0017.1	0	0.00158724	1.97294	0.22626	8	TGACCTTC	TGACCTTTGAACCT	+
TGACCTTC	V_COUP_01	0	0.00158724	1.97294	0.22626	8	TGACCTTC	TGACCTTTGAACCT	+
TGACCTTC	V_RORA2_01	1	0.00164996	2.05091	0.22626	8	TGACCTTC	TTGACCTACTTAT	-
TGACCTTC	MA0072.1	1	0.00190938	2.37336	0.232554	8	TGACCTTC	TTGACCTACTTATA	-
TGACCTTC	V_T3R_01	5	0.00192782	2.39628	0.232554	8	TGACCTTC	TGGCGTGACCTCAATC	-
TGACCTTC	MA0065.2	0	0.00197851	2.45929	0.232554	8	TGACCTTC	TGACCTTTGCCCTAC	-
TGACCTTC	MA0159.1	0	0.00234174	2.91078	0.245384	8	TGACCTTC	TGACCTCTCCGTGACCT	-
TGACCTTC	V_GCNF_01	2	0.00245193	3.04775	0.245384	8	TGACCTTC	GGTGAACTTGAACTTGAG	-
TGACCTTC	V_HNF4_01	3	0.00254702	3.16595	0.245384	8	TGACCTTC	TCGTGACCTTTGACCCTGT	-
TGACCTTC	MA0114.1	0	0.00258472	3.21281	0.245384	8	TGACCTTC	TGACCTTTGGCCT	-
TGACCTTC	Hoxc9_2367.2	8	0.00332469	4.13259	0.303944	8	TGACCTTC	ATAATTAATGACCTCC	-
TGACCTTC	MA0112.2	9	0.00396658	4.93045	0.341587	8	TGACCTTC	AGGTCAGGGTGACCTGGGCC	-
TGACCTTC	V_ER_Q6	11	0.00401323	4.98845	0.341587	8	TGACCTTC	ACAGGTCACTGTGACCTGA	+
TGACCTTC	MA0459.1	2	0.00438339	5.44856	0.360657	8	TGACCTTC	TTTGACTTTT	-
TGACCTTC	Rxra_secondary	4	0.00583034	7.24711	0.464235	8	TGACCTTC	AGTACAACCTTCGCGA	-
TGACCTTC	Cdx1_2245.1	8	0.00688832	8.56218	0.515234	8	TGACCTTC	TAATTTTATTACCTTA	-
TGACCTTC	MA0129.1	0	0.00907962	11.286	0.659165	7	TGACCTTC	TGACGTA	-
TGACCTTC	V_CREBP1CJUN_01	0	0.00992459	12.3363	0.699922	8	TGACCTTC	TGACGTCA	+
ATTTGCAT	V_OCT_C	3	3.80069e-07	0.000472426	0.000943869	8	ATTTGCAT	CTCATTTGCATAC	+
ATTTGCAT	V_OCT1_01	5	7.60138e-07	0.000944851	0.000943869	8	ATTTGCAT	CCGAAATTTGCATATTGAA	-
ATTTGCAT	Pou2f3_3986.2	4	1.61401e-06	0.00200622	0.000944075	8	ATTTGCAT	TCTAATTTGCATACAA	-
ATTTGCAT	V_OCT1_05	3	1.79543e-06	0.00223172	0.000944075	8	ATTTGCAT	ATAATTTGCATATT	+
ATTTGCAT	Pou2f2_3748.1	4	1.94496e-06	0.00241759	0.000944075	8	ATTTGCAT	TCTAATTTGCATACAA	-
ATTTGCAT	MA0453.1	3	2.28091e-06	0.00283517	0.000944075	8	ATTTGCAT	CTAATTTGCATA	-
ATTTGCAT	V_OCT1_Q6	3	3.64945e-06	0.00453627	0.00129473	8	ATTTGCAT	GTGATTTGCATATTT	-
ATTTGCAT	MA0142.1	0	5.81474e-06	0.00722772	0.00180505	8	ATTTGCAT	ATTTGCATAACAAAG	-
ATTTGCAT	V_OCT1_04	7	3.60413e-05	0.0447993	0.00994506	8	ATTTGCAT	TCTTTTAATTTGCATAATCATAA	-
ATTTGCAT	V_OCT1_07	1	0.000520748	0.64729	0.129323	8	ATTTGCAT	AATTAGCATACA	-
ATTTGCAT	MA0274.1	0	0.000798292	0.992277	0.180226	8	ATTTGCAT	ACTTGAAT	+
ATTTGCAT	V_POU3F2_02	0	0.00172957	2.14986	0.357937	8	ATTTGCAT	ATTAACATAA	-
ATTTGCAT	F_MATA1_01	0	0.00248186	3.08495	0.448585	8	ATTTGCAT	ATTTACATCA	-
ATTTGCAT	MA0328.1	0	0.00252885	3.14336	0.448585	8	ATTTGCAT	AATTACATG	-
ATTTGCAT	Pou3f3_3235.2	3	0.00334386	4.15642	0.553613	8	ATTTGCAT	AAAATATGCATAATAAA	+
GCAAATTT	V_OCT1_01	8	2.70311e-05	0.0335997	0.0671993	8	GCAAATTT	ATCAATATGCAAATTTCGG	+
GCAAATTT	Mafb_primary	9	0.000305307	0.379497	0.379497	8	GCAAATTT	GCTAAGTCAGCAAATTT	-
GCAAATTT	Pou2f2_3748.1	6	0.00086701	1.07769	0.539593	8	GCAAATTT	TTGTATGCAAATTAGA	+
GCAAATTT	Pou2f3_3986.2	6	0.000913666	1.13569	0.539593	8	GCAAATTT	TTGTATGCAAATTAGA	+
GCAAATTT	V_OCT1_04	10	0.00124132	1.54296	0.539593	8	GCAAATTT	ATATAATTATGCAAATTAAAAGA	+
GCAAATTT	Mafk_secondary	4	0.00130231	1.61878	0.539593	8	GCAAATTT	CCTTGCAATTTTTTC	-
GCAAATTT	Mafk_primary	6	0.00184015	2.28731	0.586348	8	GCAAATTT	AAGTCAGCATTTTTA	-
GCAAATTT	MA0453.1	3	0.00188688	2.34539	0.586348	8	GCAAATTT	TATGCAAATTAG	+
TGCAAATC	V_OCT1_Q6	5	1.89077e-05	0.0235023	0.0470046	8	TGCAAATC	GAATATGCAAATCAG	+
TGCAAATC	V_OCT1_05	4	7.24294e-05	0.0900298	0.0621581	8	TGCAAATC	AATATGCAAATTAG	-
TGCAAATC	V_OCT_C	3	7.50098e-05	0.0932372	0.0621581	8	TGCAAATC	GTATGCAAATGAG	-
TGCAAATC	MA0453.1	2	0.000153486	0.190784	0.0953918	8	TGCAAATC	TATGCAAATTAG	+
TGCAAATC	Pou2f3_3986.2	5	0.000231227	0.287415	0.114966	8	TGCAAATC	TTGTATGCAAATTAGA	+
TGCAAATC	Pou2f2_3748.1	5	0.000325053	0.404041	0.122594	8	TGCAAATC	TTGTATGCAAATTAGA	+
TGCAAATC	V_OCT1_01	7	0.000345195	0.429077	0.122594	8	TGCAAATC	ATCAATATGCAAATTTCGG	+
TGCAAATC	MA0434.1	0	0.00105686	1.31368	0.32842	8	TGCAAATC	TGTAGATCA	+
TGCAAATC	V_OCT1_04	9	0.0012178	1.51372	0.336383	8	TGCAAATC	ATATAATTATGCAAATTAAAAGA	+
TTTGCATC	MA0142.1	1	0.000341536	0.424529	0.252356	8	TTTGCATC	ATTTGCATAACAAAG	-
TTTGCATC	MA0295.1	0	0.000343713	0.427235	0.252356	8	TTTGCATC	TTTGCGTC	-
TTTGCATC	V_OCT1_Q6	4	0.000380868	0.473419	0.252356	8	TTTGCATC	GTGATTTGCATATTT	-
TTTGCATC	V_OCT_C	4	0.000491777	0.611278	0.252356	8	TTTGCATC	CTCATTTGCATAC	+
TTTGCATC	MA0453.1	4	0.000567437	0.705324	0.252356	8	TTTGCATC	CTAATTTGCATA	-
TTTGCATC	Pou2f3_3986.2	5	0.000729824	0.907171	0.252356	8	TTTGCATC	TCTAATTTGCATACAA	-
TTTGCATC	V_OCT1_05	4	0.000784363	0.974963	0.252356	8	TTTGCATC	ATAATTTGCATATT	+
TTTGCATC	Pou2f2_3748.1	5	0.000812274	1.00966	0.252356	8	TTTGCATC	TCTAATTTGCATACAA	-
TTTGCATC	V_OCT1_01	6	0.00102107	1.26919	0.281976	8	TTTGCATC	CCGAAATTTGCATATTGAA	-
TTTGCATC	MA0143.1	0	0.00140102	1.74146	0.348212	8	TTTGCATC	TTTGCATAACAAAGG	-
TTTGCATC	F_MATA1_01	1	0.00157053	1.95217	0.354858	8	TTTGCATC	ATTTACATCA	-
TTTGCATC	V_OCT1_04	8	0.00194855	2.42204	0.403581	8	TTTGCATC	TCTTTTAATTTGCATAATCATAA	-
ATAACAAT	MA0087.1	-1	5.30231e-05	0.0659077	0.107001	7	ATAACAAT	AAACAAT	+
ATAACAAT	Sox1_secondary	2	9.95838e-05	0.123783	0.107001	8	ATAACAAT	CGATAACAATTATAG	-
ATAACAAT	MA0143.1	5	0.000129943	0.161519	0.107001	8	ATAACAAT	TTTGCATAACAAAGG	-
ATAACAAT	Sox12_primary	4	0.000200055	0.248668	0.107618	8	ATAACAAT	GTTTAGAACAATTA	-
ATAACAAT	MA00445.1	0	0.000346281	0.430428	0.107618	8	ATAACAAT	AGAACAATGGA	-
ATAACAAT	MA0142.1	6	0.000390061	0.484845	0.107618	8	ATAACAAT	ATTTGCATAACAAAG	-
ATAACAAT	Sox18_primary	4	0.000390485	0.485373	0.107618	8	ATAACAAT	TTTTAGAACAATTGAA	-
ATAACAAT	MA0217.1	-1	0.00041898	0.520792	0.107618	5	ATAACAAT	TAACA	+
ATAACAAT	V_SOX5_01	0	0.0004495	0.558728	0.107618	8	ATAACAAT	TTAACAATAC	+
ATAACAAT	MA0084.1	1	0.000453025	0.56311	0.107618	8	ATAACAAT	GTAAACAAT	+
ATAACAAT	Sox11_secondary	3	0.0004792	0.595646	0.107618	8	ATAACAAT	TTCATAACAATTTT	-
ATAACAAT	V_SOX9_B1	2	0.000564268	0.701385	0.116162	8	ATAACAAT	TAAGAACAATGGGA	+
ATAACAAT	Sox8_primary	3	0.00068057	0.845948	0.121733	8	ATAACAAT	TAAAGAACAATAGATAA	-
ATAACAAT	V_SRY_02	1	0.000689884	0.857526	0.121733	8	ATAACAAT	GTAAACAATAGA	+
ATAACAAT	MA0371.1	1	0.000850774	1.05751	0.140114	8	ATAACAAT	GAGAACAATGGA	-
ATAACAAT	Sox13_primary	3	0.00109816	1.36501	0.169552	8	ATAACAAT	TTAAGAACAATAATTT	+
ATAACAAT	Foxa2_secondary	4	0.00140669	1.74852	0.202372	8	ATAACAAT	AAAAATAACAAACGG	+
ATAACAAT	Sox7_primary	5	0.00147457	1.83289	0.202372	8	ATAACAAT	AATAAAGAACAATAGAATTTCA	+
ATAACAAT	Sox15_primary	3	0.00165851	2.06152	0.215637	8	ATAACAAT	TAGTGAACAATAGATTT	+
ATAACAAT	Sox5_primary	3	0.00174694	2.17145	0.215778	8	ATAACAAT	TTTAGAACAATAAAAT	+
ATAACAAT	Sox4_secondary	3	0.00214032	2.66042	0.24104	8	ATAACAAT	TTCCTAACAATTTTTCC	-
ATAACAAT	Sox17_primary	1	0.00220751	2.74393	0.24104	8	ATAACAAT	ATAAACAATTAATCA	+
ATAACAAT	V_FOXJ2_02	0	0.00224418	2.78952	0.24104	8	ATAACAAT	ATAATAATATTTTT	+
ATAACAAT	MA0233.1	-1	0.00300122	3.73052	0.30305	5	ATAACAAT	AAACA	+
ATAACAAT	Zfp105_primary	5	0.00307664	3.82427	0.30305	8	ATAACAAT	AACAAACAACAAGAG	+
ATAACAAT	MA0210.1	-1	0.00318955	3.96461	0.30305	5	ATAACAAT	TAACA	+
ATAACAAT	Sox30_primary	2	0.00360667	4.48309	0.326262	8	ATAACAAT	ATTGAACAATGGAATT	+
ATAACAAT	Foxj1_secondary	5	0.00369799	4.5966	0.326262	8	ATAACAAT	ATGTCACAACAACAC	+
ATAACAAT	Gata6_primary	7	0.00572388	7.11478	0.472209	8	ATAACAAT	TATAGAGATAAGAATTG	+
ATAACAAT	N_SKN1_01	3	0.00573452	7.128	0.472209	8	ATAACAAT	TGGATGACATTA	-
ATAACAAT	Foxl1_secondary	5	0.00672534	8.3596	0.535934	8	ATAACAAT	ATATCAAAACAAAACA	+
ATAACAAT	Foxj3_secondary	6	0.00743333	9.23962	0.56908	8	ATAACAAT	AACACCAAAACAAAGGA	+
ATAACAAT	MA0231.1	-1	0.00760202	9.44931	0.56908	6	ATAACAAT	TAACTA	+
ATAACAAT	MA0127.1	1	0.00980121	12.1829	0.712131	8	ATAACAAT	AATAAGAAGT	-
TGTTATGT	MA0217.1	0	0.00041898	0.520792	0.552576	5	TGTTATGT	TGTTA	-
TGTTATGT	V_E4BP4_01	0	0.000444551	0.552576	0.552576	8	TGTTATGT	CGTTATGTAACG	+
ATTTGCAT	V_OCT_C	3	3.80069e-07	0.000472426	0.000943869	8	ATTTGCAT	CTCATTTGCATAC	+
ATTTGCAT	V_OCT1_01	5	7.60138e-07	0.000944851	0.000943869	8	ATTTGCAT	CCGAAATTTGCATATTGAA	-
ATTTGCAT	Pou2f3_3986.2	4	1.61401e-06	0.00200622	0.000944075	8	ATTTGCAT	TCTAATTTGCATACAA	-
ATTTGCAT	V_OCT1_05	3	1.79543e-06	0.00223172	0.000944075	8	ATTTGCAT	ATAATTTGCATATT	+
ATTTGCAT	Pou2f2_3748.1	4	1.94496e-06	0.00241759	0.000944075	8	ATTTGCAT	TCTAATTTGCATACAA	-
ATTTGCAT	MA0453.1	3	2.28091e-06	0.00283517	0.000944075	8	ATTTGCAT	CTAATTTGCATA	-
ATTTGCAT	V_OCT1_Q6	3	3.64945e-06	0.00453627	0.00129473	8	ATTTGCAT	GTGATTTGCATATTT	-
ATTTGCAT	MA0142.1	0	5.81474e-06	0.00722772	0.00180505	8	ATTTGCAT	ATTTGCATAACAAAG	-
ATTTGCAT	V_OCT1_04	7	3.60413e-05	0.0447993	0.00994506	8	ATTTGCAT	TCTTTTAATTTGCATAATCATAA	-
ATTTGCAT	V_OCT1_07	1	0.000520748	0.64729	0.129323	8	ATTTGCAT	AATTAGCATACA	-
ATTTGCAT	MA0274.1	0	0.000798292	0.992277	0.180226	8	ATTTGCAT	ACTTGAAT	+
ATTTGCAT	V_POU3F2_02	0	0.00172957	2.14986	0.357937	8	ATTTGCAT	ATTAACATAA	-
ATTTGCAT	F_MATA1_01	0	0.00248186	3.08495	0.448585	8	ATTTGCAT	ATTTACATCA	-
ATTTGCAT	MA0328.1	0	0.00252885	3.14336	0.448585	8	ATTTGCAT	AATTACATG	-
ATTTGCAT	Pou3f3_3235.2	3	0.00334386	4.15642	0.553613	8	ATTTGCAT	AAAATATGCATAATAAA	+
GCAAATCC	V_OCT1_05	5	0.000407518	0.506545	0.455598	8	GCAAATCC	AATATGCAAATTAG	-
GCAAATCC	V_OCT1_Q6	6	0.000490526	0.609724	0.455598	8	GCAAATCC	GAATATGCAAATCAG	+
GCAAATCC	Pitx3_3497.2	4	0.000838483	1.04223	0.455598	8	GCAAATCC	GGCAGCTAATCCCCCT	-
GCAAATCC	MA0023.1	0	0.000943798	1.17314	0.455598	8	GCAAATCC	GGAAAACCCC	-
GCAAATCC	MA0435.1	7	0.00120305	1.4954	0.455598	8	GCAAATCC	TGAAGACGTAAATCCTTACA	+
GCAAATCC	MA0434.1	1	0.0014236	1.76953	0.455598	8	GCAAATCC	TGTAGATCA	+
GCAAATCC	MA0107.1	0	0.00192939	2.39823	0.455598	8	GCAAATCC	GGAAATTCCC	-
GCAAATCC	V_NFKAPPAB65_01	0	0.00192939	2.39823	0.455598	8	GCAAATCC	GGAAATTCCC	-
GCAAATCC	Crx_3485.1	2	0.00201022	2.4987	0.455598	8	GCAAATCC	AGGCTAATCCCCAACG	-
GCAAATCC	MA0101.1	0	0.0021949	2.72826	0.455598	8	GCAAATCC	GGAAATCCCC	-
GCAAATCC	V_CREL_01	0	0.0021949	2.72826	0.455598	8	GCAAATCC	GGAAATCCCC	-
GCAAATCC	Pou2f3_3986.2	6	0.00220504	2.74087	0.455598	8	GCAAATCC	TTGTATGCAAATTAGA	+
GCAAATCC	MA0453.1	3	0.00306174	3.80574	0.547174	8	GCAAATCC	TATGCAAATTAG	+
GCAAATCC	V_TAXCREB_02	5	0.00308963	3.84042	0.547174	8	GCAAATCC	ATGACGCATACCCCC	+
GCAAATCC	V_OCT_C	4	0.0033309	4.14031	0.550575	8	GCAAATCC	GTATGCAAATGAG	-
GCAAATCC	Pou2f2_3748.1	6	0.00411897	5.11988	0.636542	8	GCAAATCC	TTGTATGCAAATTAGA	+
GCAAATCC	Gsc_2327.3	4	0.00475831	5.91458	0.636542	8	GCAAATCC	AATCGTTAATCCCTTTA	+
GCAAATCC	V_NFKB_C	2	0.00485926	6.04006	0.636542	8	GCAAATCC	TGGAAAGTCCCC	-
GCAAATCC	I_DL_02	3	0.00487792	6.06326	0.636542	8	GCAAATCC	TGAGAAAACCC	+
GCAAATCC	V_OCT1_01	8	0.0052039	6.46845	0.645127	8	GCAAATCC	ATCAATATGCAAATTTCGG	+
GCAAATCC	I_DL_01	2	0.00550544	6.84326	0.650008	8	GCAAATCC	GGGAAAAACCC	-
GCAAATCC	MA0234.1	-2	0.0066505	8.26657	0.74951	6	GCAAATCC	TAATCC	+
ATTTGCAT	V_OCT_C	3	3.80069e-07	0.000472426	0.000943869	8	ATTTGCAT	CTCATTTGCATAC	+
ATTTGCAT	V_OCT1_01	5	7.60138e-07	0.000944851	0.000943869	8	ATTTGCAT	CCGAAATTTGCATATTGAA	-
ATTTGCAT	Pou2f3_3986.2	4	1.61401e-06	0.00200622	0.000944075	8	ATTTGCAT	TCTAATTTGCATACAA	-
ATTTGCAT	V_OCT1_05	3	1.79543e-06	0.00223172	0.000944075	8	ATTTGCAT	ATAATTTGCATATT	+
ATTTGCAT	Pou2f2_3748.1	4	1.94496e-06	0.00241759	0.000944075	8	ATTTGCAT	TCTAATTTGCATACAA	-
ATTTGCAT	MA0453.1	3	2.28091e-06	0.00283517	0.000944075	8	ATTTGCAT	CTAATTTGCATA	-
ATTTGCAT	V_OCT1_Q6	3	3.64945e-06	0.00453627	0.00129473	8	ATTTGCAT	GTGATTTGCATATTT	-
ATTTGCAT	MA0142.1	0	5.81474e-06	0.00722772	0.00180505	8	ATTTGCAT	ATTTGCATAACAAAG	-
ATTTGCAT	V_OCT1_04	7	3.60413e-05	0.0447993	0.00994506	8	ATTTGCAT	TCTTTTAATTTGCATAATCATAA	-
ATTTGCAT	V_OCT1_07	1	0.000520748	0.64729	0.129323	8	ATTTGCAT	AATTAGCATACA	-
ATTTGCAT	MA0274.1	0	0.000798292	0.992277	0.180226	8	ATTTGCAT	ACTTGAAT	+
ATTTGCAT	V_POU3F2_02	0	0.00172957	2.14986	0.357937	8	ATTTGCAT	ATTAACATAA	-
ATTTGCAT	F_MATA1_01	0	0.00248186	3.08495	0.448585	8	ATTTGCAT	ATTTACATCA	-
ATTTGCAT	MA0328.1	0	0.00252885	3.14336	0.448585	8	ATTTGCAT	AATTACATG	-
ATTTGCAT	Pou3f3_3235.2	3	0.00334386	4.15642	0.553613	8	ATTTGCAT	AAAATATGCATAATAAA	+
GCAAATGA	V_OCT_C	4	3.79767e-06	0.00472051	0.00944101	8	GCAAATGA	GTATGCAAATGAG	-
GCAAATGA	MA0453.1	3	7.07503e-05	0.0879427	0.0879427	8	GCAAATGA	TATGCAAATTAG	+
GCAAATGA	Pou2f2_3748.1	6	0.000162482	0.201965	0.100982	8	GCAAATGA	TTGTATGCAAATTAGA	+
GCAAATGA	Pou2f3_3986.2	6	0.000162482	0.201965	0.100982	8	GCAAATGA	TTGTATGCAAATTAGA	+
GCAAATGA	V_OCT1_05	5	0.000214026	0.266034	0.106414	8	GCAAATGA	AATATGCAAATTAG	-
GCAAATGA	V_OCT1_Q6	6	0.000447509	0.556253	0.185418	8	GCAAATGA	GAATATGCAAATCAG	+
ATGCAAAC	V_OCT_C	2	0.000491777	0.611278	0.252958	8	ATGCAAAC	GTATGCAAATGAG	-
ATGCAAAC	MA0453.1	1	0.000567437	0.705324	0.252958	8	ATGCAAAC	TATGCAAATTAG	+
ATGCAAAC	MA0142.1	7	0.000583777	0.725635	0.252958	8	ATGCAAAC	CTTTGTTATGCAAAT	+
ATGCAAAC	MA0148.1	2	0.000689495	0.857043	0.252958	8	ATGCAAAC	CAAAGTAAACA	-
ATGCAAAC	V_OCT1_Q6	4	0.000763474	0.948998	0.252958	8	ATGCAAAC	GAATATGCAAATCAG	+
ATGCAAAC	V_OCT1_05	3	0.000784363	0.974963	0.252958	8	ATGCAAAC	AATATGCAAATTAG	-
ATGCAAAC	Pou2f3_3986.2	4	0.000902544	1.12186	0.252958	8	ATGCAAAC	TTGTATGCAAATTAGA	+
ATGCAAAC	Pou2f2_3748.1	4	0.000950792	1.18183	0.252958	8	ATGCAAAC	TTGTATGCAAATTAGA	+
ATGCAAAC	MA0446.1	2	0.0010171	1.26426	0.252958	8	ATGCAAAC	TTAAGCAAACA	-
ATGCAAAC	V_OCT1_01	6	0.00102107	1.26919	0.252958	8	ATGCAAAC	ATCAATATGCAAATTTCGG	+
ATGCAAAC	Hic1_primary	3	0.00149539	1.85877	0.325644	8	ATGCAAAC	ACTATGCCAACCTACC	+
ATGCAAAC	Foxk1_primary	3	0.00157736	1.96066	0.325644	8	ATGCAAAC	AAAATGTAAACAAACAG	+
ATGCAAAC	V_FOXO3_01	1	0.00189196	2.35171	0.360548	8	ATGCAAAC	TATGTAAACAACAA	-
ATGCAAAC	MA0458.1	1	0.00231986	2.88358	0.410513	8	ATGCAAAC	AATGTAAACAA	-
ATGCAAAC	Foxl1_primary	3	0.00254421	3.16245	0.420199	8	ATGCAAAC	TAAATGTAAACAAAGGT	+
ATGCAAAC	V_OCT1_04	8	0.00333315	4.1431	0.486298	8	ATGCAAAC	ATATAATTATGCAAATTAAAAGA	+
ATGCAAAC	MA0019.1	2	0.0035333	4.3919	0.486298	8	ATGCAAAC	AGATGCAATCCC	+
ATGCAAAC	MA0047.2	3	0.0035333	4.3919	0.486298	8	ATGCAAAC	CCTAAGTAAACA	-
ATGCAAAC	V_CHOP_01	2	0.00417816	5.19345	0.517089	8	ATGCAAAC	AGATGCAATCCCC	+
ATGCAAAC	V_FOXO1_02	1	0.00423924	5.26938	0.517089	8	ATGCAAAC	AATGTAAACAACAC	-
ATGCAAAC	Pou3f3_3235.2	6	0.00438319	5.44831	0.517089	8	ATGCAAAC	TTTATTATGCATATTTT	-
ATGCAAAC	N_DAF16_01	1	0.00571188	7.09986	0.643206	8	ATGCAAAC	GTTGTAAACAACAC	-
ATGCAAAC	MA0296.1	4	0.0061612	7.65837	0.663638	8	ATGCAAAC	TGAATTGTAAACAAAGAGGA	+
ATGCAAAC	Foxa2_primary	3	0.00675341	8.39449	0.697117	8	ATGCAAAC	AAAAAGTAAACAAAGAC	+
ATGCAAAC	V_FREAC4_01	3	0.0075368	9.36824	0.700763	8	ATGCAAAC	CTTAAGTAAACATTGG	+
ATGCAAAC	V_FOXO4_02	1	0.00762565	9.47868	0.700763	8	ATGCAAAC	AACGTAAACAACAT	-
ATGCAAAC	V_OCT1_02	6	0.00763732	9.49319	0.700763	8	ATGCAAAC	ATGAATATGCATATA	+
AGCCTCAG	Tcfap2e_primary	2	0.000317085	0.394137	0.672663	8	AGCCTCAG	ATCGCCTCAGGCAAT	-
AGCCTCAG	Tcfap2b_secondary	2	0.000811741	1.00899	0.672663	8	AGCCTCAG	ATTGCCTCAGGCAAT	+
TCCCCAGA	MA0056.1	0	8.07854e-05	0.100416	0.200543	6	TCCCCAGA	TCCCCA	-
TCCCCAGA	F_MIG1_01	1	0.000300983	0.374122	0.282465	8	TCCCCAGA	TACCCCACATTTATTTC	-
TCCCCAGA	V_OLF1_01	6	0.000341359	0.42431	0.282465	8	TCCCCAGA	CACAACTCCCCAGGGAGGTTGT	+
TCCCCAGA	MA0364.1	-1	0.000609874	0.758073	0.378489	7	TCCCCAGA	CCCCTGA	+
TCCCCAGA	V_MZF1_01	0	0.00130672	1.62425	0.648763	8	TCCCCAGA	TCCCCACT	-
TCCCCAGA	MA0332.1	-1	0.00208243	2.58846	0.651909	6	TCCCCAGA	CCACAG	-
TCCCCAGA	MA0339.1	-1	0.00219893	2.73327	0.651909	7	TCCCCAGA	CCCCGCA	+
TCCCCAGA	MA0344.1	0	0.00229683	2.85495	0.651909	8	TCCCCAGA	TCCCCGGC	-
TCCCCAGA	F_STRE_01	0	0.00271583	3.37577	0.651909	8	TCCCCAGA	CCCCCTGA	-
TCCCCAGA	V_STAT_01	0	0.00308951	3.84026	0.651909	8	TCCCCAGA	TTCCCGGAA	+
TCCCCAGA	MA0353.1	0	0.00320414	3.98274	0.651909	8	TCCCCAGA	TCCGCGGA	+
TCCCCAGA	MA0337.1	0	0.00341394	4.24353	0.651909	7	TCCCCAGA	CCCCCGC	+
TCCCCAGA	Crx_3485.1	7	0.00398435	4.95254	0.671114	8	TCCCCAGA	AGGCTAATCCCCAACG	-
TCCCCAGA	MA0268.1	0	0.00405521	5.04063	0.671114	7	TCCCCAGA	ACCCCAC	+
TCCCCAGA	MA0338.1	-1	0.00441359	5.48609	0.684772	7	TCCCCAGA	CCCCGCA	+
TCCCCAGA	MA0436.1	-1	0.00501543	6.23418	0.699259	7	TCCCCAGA	CCCCACG	+
TCCCCAGA	MA0441.1	1	0.00521317	6.47997	0.699259	8	TCCCCAGA	TTCCCCGCA	+
TCCCCAGA	MA0155.1	2	0.00535202	6.65257	0.699259	8	TCCCCAGA	CGCCCCCTGACA	-
TCCCCAGA	MA0352.1	0	0.00607063	7.5458	0.71761	8	TCCCCAGA	TCCGCGGA	+
TGGGGAGA	MA0056.1	0	8.07854e-05	0.100416	0.171911	6	TGGGGAGA	TGGGGA	+
TGGGGAGA	V_SREBP1_02	1	0.000138303	0.171911	0.171911	8	TGGGGAGA	GTGGGGTGATA	-
TGGGGAGA	V_LYF1_01	1	0.000574288	0.71384	0.475893	8	TGGGGAGA	TTTGGGAGA	+
CCCCAGAA	MA0413.1	6	0.000510848	0.634983	0.701074	8	CCCCAGAA	AAATTCCCCCTGAATTTGTG	+
CCCCAGAA	MA0364.1	0	0.000564018	0.701074	0.701074	7	CCCCAGAA	CCCCTGA	+
CTGGGGTG	V_SREBP1_02	0	9.68614e-05	0.120399	0.240352	8	CTGGGGTG	GTGGGGTGATA	-
CTGGGGTG	V_ROAZ_01	5	0.000323683	0.402338	0.401595	8	CTGGGGTG	GCACCCTTGGGTGC	-
CTGGGGTG	F_ADR1_01	-1	0.000794928	0.988095	0.507196	6	CTGGGGTG	TGGGGT	+
CTGGGGTG	MA0268.1	0	0.00103815	1.29042	0.507196	7	CTGGGGTG	GTGGGGT	-
CTGGGGTG	MA0337.1	0	0.00119787	1.48895	0.507196	7	CTGGGGTG	GCGGGGG	-
CTGGGGTG	F_MIG1_01	9	0.0013642	1.69571	0.507196	8	CTGGGGTG	TAAAAAAATCTGGGGTA	+
CTGGGGTG	V_CP2_01	0	0.00155964	1.93864	0.507196	8	CTGGGGTG	CTGGGTAGAGC	-
CTGGGGTG	MA0116.1	6	0.00174403	2.16783	0.507196	8	CTGGGGTG	GCACCCCTGGGTGCC	-
CTGGGGTG	Zic1_primary	6	0.00183959	2.28661	0.507196	8	CTGGGGTG	CCCCCCCGGGGGTG	-
CTGGGGTG	MA0332.1	0	0.00222465	2.76523	0.522133	6	CTGGGGTG	CTGTGG	+
CTGGGGTG	Plagl1_secondary	1	0.00258888	3.21798	0.522133	8	CTGGGGTG	GCTGGGGGGTACCCCTT	+
CTGGGGTG	Zic2_primary	6	0.00272467	3.38676	0.522133	8	CTGGGGTG	CCCCCCCGGGGGGGT	+
CTGGGGTG	Zic3_primary	6	0.00324029	4.02768	0.574319	8	CTGGGGTG	CCCCCCCGGGGGGGT	+
CTGGGGTG	V_AML1_01	-1	0.00407997	5.07141	0.648218	6	CTGGGGTG	TGTGGT	+
CTGGGGTG	Tcfap2a_secondary	5	0.00473158	5.88136	0.690646	8	CTGGGGTG	CTGCCCAGAGGTGA	-
CTGGGGTG	Bcl6b_secondary	3	0.00529456	6.58114	0.729887	8	CTGGGGTG	TTTTAGGGGCGGGGAT	-
TGGGGTGT	V_SREBP1_02	1	0.000138303	0.171911	0.343604	8	TGGGGTGT	GTGGGGTGATA	-
TGGGGTGT	Glis2_primary	3	0.000711807	0.884777	0.618415	8	TGGGGTGT	CTGTGGGGGGTCGATA	-
TGGGGTGT	F_ADR1_01	0	0.000746751	0.928211	0.618415	6	TGGGGTGT	TGGGGT	+
TGGGGTGT	Plagl1_secondary	2	0.00101214	1.25809	0.628646	8	TGGGGTGT	GCTGGGGGGTACCCCTT	+
TGGGGTGT	Six2_2307.2	2	0.00142108	1.7664	0.706112	8	TGGGGTGT	AATGGGGTATCACTTTT	+
AGAAACCC	MA0260.1	-1	0.000150888	0.187554	0.375107	6	AGAAACCC	GAAACC	+
AGAAACCC	I_DL_01	3	0.000313389	0.389543	0.389543	8	AGAAACCC	GGGAAAAACCC	-
AGAAACCC	MA0022.1	3	0.000680005	0.845246	0.4476	8	AGAAACCC	CGGAAAAACCCC	-
AGAAACCC	Dobox4_3956.2	5	0.000720193	0.8952	0.4476	8	AGAAACCC	TAAATAGATACCCCATA	+
CTTGGCTA	MA0368.1	0	0.000215209	0.267505	0.535011	7	CTTGGCTA	CTTGGCG	-
ACCCCAGA	F_MIG1_01	1	0.00016313	0.202771	0.404464	8	ACCCCAGA	TACCCCACATTTATTTC	-
ACCCCAGA	V_SEF1_C	1	0.000448126	0.557021	0.409268	8	ACCCCAGA	GACCACAGATATCCGTGTT	-
ACCCCAGA	MA0364.1	-1	0.000609874	0.758073	0.409268	7	ACCCCAGA	CCCCTGA	+
ACCCCAGA	F_ADR1_01	0	0.000746751	0.928211	0.409268	6	ACCCCAGA	ACCCCA	-
ACCCCAGA	MA0268.1	0	0.00100109	1.24436	0.409268	7	ACCCCAGA	ACCCCAC	+
ACCCCAGA	MA0002.2	2	0.00105117	1.30661	0.409268	8	ACCCCAGA	AAACCACAGAC	-
ACCCCAGA	MA0337.1	0	0.00115547	1.43625	0.409268	7	ACCCCAGA	CCCCCGC	+
ACCCCAGA	MA0155.1	2	0.00141227	1.75545	0.437697	8	ACCCCAGA	CGCCCCCTGACA	-
ACCCCAGA	MA0332.1	-1	0.00208243	2.58846	0.545201	6	ACCCCAGA	CCACAG	-
ACCCCAGA	MA0339.1	-1	0.00219893	2.73327	0.545201	7	ACCCCAGA	CCCCGCA	+
ACCCCAGA	MA0154.1	0	0.00269104	3.34496	0.560781	8	ACCCCAGA	ACCCAAGGGA	+
ACCCCAGA	Hnf4a_primary	7	0.00271412	3.37365	0.560781	8	ACCCCAGA	TCAATTGACCCCTGAAG	-
ACCCCAGA	Rxra_primary	7	0.00324311	4.03119	0.599665	8	ACCCCAGA	TGTCGTGACCCCTTAAT	+
ACCCCAGA	MA0372.1	0	0.00377437	4.69155	0.599665	8	ACCCCAGA	ACCCCTAA	+
ACCCCAGA	V_AML1_01	0	0.00383339	4.76491	0.599665	6	ACCCCAGA	ACCACA	-
ACCCCAGA	Smad3_primary	2	0.00421752	5.24238	0.599665	8	ACCCCAGA	CAAATCCAGACATCAGA	+
ACCCCAGA	MA0338.1	-1	0.00441359	5.48609	0.599665	7	ACCCCAGA	CCCCGCA	+
ACCCCAGA	MA0413.1	5	0.00455719	5.66459	0.599665	8	ACCCCAGA	AAATTCCCCCTGAATTTGTG	+
ACCCCAGA	MA0092.1	0	0.00459533	5.71199	0.599665	8	ACCCCAGA	ATGCCAGACC	-
ACCCCAGA	MA0436.1	-1	0.00501543	6.23418	0.621763	7	ACCCCAGA	CCCCACG	+
TGGGGTGT	V_SREBP1_02	1	0.000138303	0.171911	0.343604	8	TGGGGTGT	GTGGGGTGATA	-
TGGGGTGT	Glis2_primary	3	0.000711807	0.884777	0.618415	8	TGGGGTGT	CTGTGGGGGGTCGATA	-
TGGGGTGT	F_ADR1_01	0	0.000746751	0.928211	0.618415	6	TGGGGTGT	TGGGGT	+
TGGGGTGT	Plagl1_secondary	2	0.00101214	1.25809	0.628646	8	TGGGGTGT	GCTGGGGGGTACCCCTT	+
TGGGGTGT	Six2_2307.2	2	0.00142108	1.7664	0.706112	8	TGGGGTGT	AATGGGGTATCACTTTT	+
ACAAAGCT	MA0442.1	0	0.000206109	0.256193	0.271096	6	ACAAAGCT	ACAAAG	-
ACAAAGCT	MA0053.1	-2	0.000224796	0.279421	0.271096	5	ACAAAGCT	AAAGC	+
ACAAAGCT	MA0064.1	-2	0.000327147	0.406644	0.271096	5	ACAAAGCT	AAAGC	+
ACAAAGCT	MA0020.1	-2	0.00096812	1.20337	0.601687	6	ACAAAGCT	AAAGCA	+
CTTTGTCA	MA0442.1	0	0.000182363	0.226677	0.444071	6	CTTTGTCA	CTTTGT	+
CTTTGTCA	MA0143.1	1	0.000497669	0.618603	0.444071	8	CTTTGTCA	CCTTTGTTATGCAAA	+
CTTTGTCA	MA0150.1	2	0.00053601	0.66626	0.444071	8	CTTTGTCA	TGCTGAGTCAT	-
CTTTGTCA	MA0142.1	0	0.000763474	0.948998	0.472625	8	CTTTGTCA	CTTTGTTATGCAAAT	+
CTTTGTCA	Sox12_secondary	4	0.000950792	1.18183	0.472625	8	CTTTGTCA	ATTCCTTTGTCTATTT	-
CTTTGTCA	Mafb_primary	1	0.00210773	2.61991	0.613419	8	CTTTGTCA	GCTAAGTCAGCAAATTT	-
CTTTGTCA	MA0222.1	0	0.00222107	2.76079	0.613419	8	CTTTGTCA	TTTTGACA	+
CTTTGTCA	MA0207.1	-2	0.00222184	2.76174	0.613419	6	CTTTGTCA	CTGTCA	-
CTTTGTCA	V_AP1_Q4	1	0.0023128	2.87481	0.613419	8	CTTTGTCA	ACTGAGTCACC	-
CTTTGTCA	MA0252.1	-2	0.00247652	3.07831	0.613419	6	CTTTGTCA	CTGTCA	-
CTTTGTCA	V_AP1_Q2	1	0.00275515	3.42465	0.613419	8	CTTTGTCA	TCTGAGTCACC	-
CTTTGTCA	N_SKN1_01	0	0.00296167	3.68136	0.613419	8	CTTTGTCA	TAATGTCATCCT	+
CTCCTGGC	F_PACC_01	5	0.000225104	0.279804	0.559609	8	CTCCTGGC	AACGCCGCTTGGCCGGG	-
CCAAGGAC	MA0138.2	7	0.000299783	0.37263	0.416251	8	CCAAGGAC	TTCAGCACCATGGACAGCGCC	+
CCAAGGAC	V_NRSF_01	7	0.000334877	0.416251	0.416251	8	CCAAGGAC	TTCAGCACCACGGACAGCGCC	+
CCTTGGCC	MA0368.1	-1	0.000163188	0.202843	0.215879	7	CCTTGGCC	CTTGGCG	-
CCTTGGCC	MA0141.1	3	0.000233495	0.290234	0.215879	8	CCTTGGCC	TGACCTTGAGCT	-
CCTTGGCC	MA0163.1	3	0.000261419	0.324944	0.215879	8	CCTTGGCC	CCCCCTTGGGCCCC	-
CCTTGGCC	V_ARP1_01	5	0.000799315	0.993549	0.36573	8	CCTTGGCC	TGAACCCTTGACCCCT	+
CCTTGGCC	Zfp187_secondary	4	0.000839354	1.04332	0.36573	8	CCTTGGCC	GAGCCCTTGTCCCTTG	+
CCTTGGCC	MA0114.1	4	0.00100587	1.25029	0.36573	8	CCTTGGCC	TGACCTTTGGCCT	-
CCTTGGCC	MA0065.2	3	0.00120718	1.50053	0.36573	8	CCTTGGCC	TGACCTTTGCCCTAC	-
CCTTGGCC	MA0313.1	-2	0.00154587	1.92152	0.36573	5	CCTTGGCC	TTGGT	+
CCTTGGCC	MA0381.1	-2	0.00160472	1.99467	0.36573	6	CCTTGGCC	ATGGCC	-
CCTTGGCC	F_PACC_01	6	0.00164399	2.04348	0.36573	8	CCTTGGCC	AACGCCGCTTGGCCGGG	-
CCTTGGCC	MA0161.1	-2	0.00169226	2.10348	0.36573	6	CCTTGGCC	TTGGCA	+
CCTTGGCC	MA0146.1	4	0.00192089	2.38767	0.36573	8	CCTTGGCC	GGGGCCGAGGCCTG	+
CCTTGGCC	V_HNF4_01_B	4	0.00199604	2.48108	0.36573	8	CCTTGGCC	GTGACCTTTGACCCC	-
CCTTGGCC	V_PPARG_03	3	0.00206678	2.56901	0.36573	8	CCTTGGCC	TGACCTTTGCCCTAGTT	-
CCTTGGCC	Tcfap2c_secondary	4	0.00272676	3.38937	0.45035	8	CCTTGGCC	CTGCCCTTGGGCGG	-
CCTTGGCC	V_HNF4_01	7	0.00337053	4.18957	0.486183	8	CCTTGGCC	TCGTGACCTTTGACCCTGT	-
CCTTGGCC	V_NF1_Q6	0	0.00353247	4.39086	0.486183	8	CCTTGGCC	TCTTGGCAAGAAGCCAAA	+
CCTTGGCC	V_PPARA_01	4	0.00380604	4.73091	0.491771	8	CCTTGGCC	TGACCTTTGACCTAGTTTTG	-
CCTTGGCC	MA0017.1	4	0.00416858	5.18154	0.491771	8	CCTTGGCC	TGACCTTTGAACCT	+
CCTTGGCC	V_COUP_01	4	0.00416858	5.18154	0.491771	8	CCTTGGCC	TGACCTTTGAACCT	+
CCTTGGCC	Esrra_primary	8	0.00634133	7.88228	0.711474	8	CCTTGGCC	TCGCATGACCTTGAATA	-
CCTTGGCC	V_CAAT_01	1	0.0066053	8.21039	0.711474	8	CCTTGGCC	TGATTGGCTAGT	-
CCTTGGCC	MA0112.2	12	0.00691416	8.59431	0.713711	8	CCTTGGCC	AGGTCAGGGTGACCTGGGCC	-
CCTTGGCC	MA0138.2	7	0.00742649	9.23113	0.735932	8	CCTTGGCC	TTCAGCACCATGGACAGCGCC	+
CACCTGGG	MA0086.1	0	5.49889e-06	0.00683512	0.0134584	6	CACCTGGG	CACCTG	-
CACCTGGG	V_AREB6_03	3	1.47293e-05	0.0183085	0.0180248	8	CACCTGGG	CTGCACCTGTGC	+
CACCTGGG	V_LMO2COM_01	3	3.57085e-05	0.0443856	0.0291318	8	CACCTGGG	CTGCACCTGGCG	-
CACCTGGG	P_RAV1_02	2	5.42622e-05	0.067448	0.0332014	8	CACCTGGG	ATCACCTGAGGC	+
CACCTGGG	MA0103.1	0	0.000131766	0.163785	0.0622774	6	CACCTGGG	CACCTG	+
CACCTGGG	Tcfe2a_primary	6	0.000152673	0.189773	0.0622774	8	CACCTGGG	TTTTCGCACCTGTGGAT	-
CACCTGGG	V_BRACH_01	7	0.000425653	0.529087	0.148825	8	CACCTGGG	AATTTCACACCTAGGTGTGACTAG	-
CACCTGGG	V_DELTAEF1_01	3	0.000753903	0.937101	0.197655	8	CACCTGGG	TCTCACCTGAA	+
CACCTGGG	F_PHO4_01	3	0.000807589	1.00383	0.197655	8	CACCTGGG	TACCACGTGGGA	+
CACCTGGG	MA0093.1	0	0.000971544	1.20763	0.201124	7	CACCTGGG	CACGTGG	+
CACCTGGG	V_NMYC_01	3	0.00101851	1.26601	0.201124	8	CACCTGGG	CGACACGTGGGA	-
CACCTGGG	V_E47_02	5	0.00106829	1.32789	0.201124	8	CACCTGGG	GTGAACACCTGTTAAT	-
CACCTGGG	P_PIF3_02	5	0.00130137	1.6176	0.227505	8	CACCTGGG	AGGGCCACGTGGGACGT	+
CACCTGGG	V_AREB6_01	4	0.00158854	1.97456	0.247863	8	CACCTGGG	TACTTACCTGTGT	+
CACCTGGG	V_HEN1_01	8	0.00167756	2.0852	0.247863	8	CACCTGGG	GAGGGGCGCAGCTGCGCCCCAA	-
CACCTGGG	MA0104.2	2	0.00185951	2.31137	0.252839	8	CACCTGGG	GCCACGTGCG	-
CACCTGGG	V_AP4_Q6	2	0.0022984	2.85692	0.290148	8	CACCTGGG	CACAGCTGGT	+
CACCTGGG	V_AREB6_02	3	0.002371	2.94715	0.290148	8	CACCTGGG	ATTCACCTGTAC	+
CACCTGGG	V_AP4_Q5	2	0.00250067	3.10834	0.291445	8	CACCTGGG	CTCAGCTGGT	+
CACCTGGG	V_MYOD_01	3	0.00293224	3.64477	0.311045	8	CACCTGGG	CAACACCTGTCC	-
CACCTGGG	MA0147.1	2	0.00295672	3.6752	0.311045	8	CACCTGGG	CGCACGTGGC	+
CACCTGGG	V_MYOD_Q6	2	0.00334568	4.15868	0.311045	8	CACCTGGG	AGCACCTGTC	+
CACCTGGG	V_E47_01	5	0.00367852	4.57241	0.311045	8	CACCTGGG	GCGGACACCTGCCGG	-
CACCTGGG	Zic2_primary	3	0.00367852	4.57241	0.311045	8	CACCTGGG	CCCCCCCGGGGGGGT	+
CACCTGGG	Zic3_primary	3	0.00383778	4.77036	0.311045	8	CACCTGGG	CCCCCCCGGGGGGGT	+
CACCTGGG	MA0004.1	0	0.00423724	5.26689	0.311045	6	CACCTGGG	CACGTG	+
CACCTGGG	MA0364.1	0	0.00429803	5.34245	0.311045	7	CACCTGGG	CCCCTGA	+
CACCTGGG	MA0112.2	10	0.00453174	5.63295	0.311045	8	CACCTGGG	AGGTCAGGGTGACCTGGGCC	-
CACCTGGG	Zic1_primary	3	0.00453463	5.63655	0.311045	8	CACCTGGG	CACCCCCGGGGGGG	+
CACCTGGG	MA0048.1	3	0.004622	5.74515	0.311045	8	CACCTGGG	GCGCAGCTGCGT	+
CACCTGGG	MA0247.1	0	0.00487962	6.06537	0.311045	8	CACCTGGG	CACTTGAG	-
CACCTGGG	Eomes_secondary	7	0.00507424	6.30728	0.311045	8	CACCTGGG	GAGGCGACACCTCCGC	-
CACCTGGG	MA0138.2	5	0.00508353	6.31882	0.311045	8	CACCTGGG	TTCAGCACCATGGACAGCGCC	+
CACCTGGG	V_RP58_01	4	0.00521704	6.48478	0.311429	8	CACCTGGG	GAAACATCTGGA	+
CACCTGGG	MA0139.1	4	0.00541923	6.73611	0.315796	8	CACCTGGG	TGGCCACCAGGGGGCGCTA	+
CACCTGGG	Max_primary	6	0.00598372	7.43776	0.334719	8	CACCTGGG	CCCGACCACGTGGTCA	-
CACCTGGG	MA0116.1	3	0.00605275	7.52357	0.334719	8	CACCTGGG	GCACCCCTGGGTGCC	-
CACCTGGG	I_SN_01	3	0.00640123	7.95672	0.334719	8	CACCTGGG	GTGCACCTGTCTT	-
CACCTGGG	V_NRSF_01	5	0.00655827	8.15193	0.334719	8	CACCTGGG	TTCAGCACCACGGACAGCGCC	+
CACCTGGG	MA0059.1	3	0.00662531	8.23526	0.334719	8	CACCTGGG	GAGCACGTGGT	+
CACCTGGG	MA0154.1	1	0.00683806	8.4997	0.334719	8	CACCTGGG	TCCCTTGGGT	-
CACCTGGG	V_USF_Q6	2	0.00710523	8.8318	0.340978	8	CACCTGGG	GTCACGTGGC	+
CACCTGGG	V_HEN1_02	8	0.00827862	10.2903	0.36555	8	CACCTGGG	AGGGGACGCAGCTGCGCCCCCT	-
CACCTGGG	MA0456.1	0	0.00836405	10.3965	0.36555	8	CACCTGGG	CAGCGGGGGGTC	-
CACCTGGG	V_AP4_01	5	0.00886402	11.018	0.370034	8	CACCTGGG	AGAACCAGCTGCGGTCAG	+
CACCTGGG	V_AP2_Q6	0	0.00903471	11.2301	0.370034	8	CACCTGGG	CGCCGGCGGGCG	-
CACCTGGG	MA0409.1	0	0.00907141	11.2758	0.370034	7	CACCTGGG	CACGTGA	+
CACCTGGG	MA0058.1	1	0.00960137	11.9345	0.379018	8	CACCTGGG	TCACGTGGTC	-
CACCTGGG	P_PIF3_01	6	0.00998994	12.4175	0.388097	8	CACCTGGG	GTGGGCCACGTGGCGACT	+
CACCTGGG	Tcfe2a_secondary	6	0.010276	12.7731	0.388135	8	CACCTGGG	CCGGACCATCTGGCCTT	-
CACCTGGG	V_MYCMAX_01	4	0.0104667	13.0101	0.388135	8	CACCTGGG	CGACCACGTGGTCA	+
CACCTGGG	MA0358.1	0	0.0116749	14.5119	0.420206	8	CACCTGGG	TTCCCGGG	-
CACCTGGG	V_LUN1_01	8	0.0120069	14.9246	0.425894	8	CACCTGGG	TCCCAAAGTAGCTGGGA	-
CACCTGGG	V_ROAZ_01	3	0.0136638	16.9841	0.466254	8	CACCTGGG	GCACCCTTGGGTGC	-
CACCTGGG	Zbtb7b_secondary	8	0.0145464	18.0812	0.481178	8	CACCTGGG	CTTAAGACCACCATTAC	+
CACCTGGG	V_MYCMAX_02	3	0.0152063	18.9014	0.496226	8	CACCTGGG	TACCACGTGTCA	+
CACCTGGG	MA0163.1	2	0.0158489	19.7002	0.510393	8	CACCTGGG	CCCCCTTGGGCCCC	-
CACCTGGG	P_GBP_Q6	3	0.0169369	21.0526	0.538347	8	CACCTGGG	GGCCACGTGGCA	+
CACCTGGG	Eomes_primary	8	0.0175838	21.8567	0.540681	8	CACCTGGG	AATTTTCACACCTTTTA	-
CACCTGGG	Tgif1_2342.2	8	0.0182528	22.6882	0.540681	8	CACCTGGG	GATATTGACAGCTGCGT	+
CACCTGGG	V_USF_02	4	0.0183359	22.7915	0.540681	8	CACCTGGG	AAATCACGTGATAT	+
CACCTGGG	MA0091.1	4	0.0195168	24.2594	0.555428	8	CACCTGGG	CGACCATCTGTT	+
CACCTGGG	MA0249.1	3	0.0202141	25.1262	0.5622	8	CACCTGGG	CAACATATGCGA	-
CACCTGGG	V_SREBP1_01	3	0.0222019	27.597	0.608035	8	CACCTGGG	GATCACGTGAC	+
CACCTGGG	MA0269.1	10	0.022359	27.7923	0.608035	8	CACCTGGG	TTACATATTGCACCCGATTGG	+
CACCTGGG	Tcfap2a_secondary	1	0.0235305	29.2484	0.63286	8	CACCTGGG	TCACCTCTGGGCAG	+
CACCTGGG	I_SN_02	6	0.0243703	30.2922	0.648322	8	CACCTGGG	TGCAAACAGGTGGT	-
CACCTGGG	Bhlhb2_secondary	8	0.0253701	31.535	0.66363	8	CACCTGGG	TGTCGTTACACGTGGAAGGCGGT	+
CACCTGGG	MA0310.1	0	0.025488	31.6816	0.66363	8	CACCTGGG	CACGTGTC	-
CACCTGGG	V_AP2GAMMA_01	0	0.0264918	32.9293	0.671929	8	CACCTGGG	CCCCCGGGC	-
CACCTGGG	F_MIG1_01	6	0.0272134	33.8262	0.671929	8	CACCTGGG	TAAAAAAATCTGGGGTA	+
CACCTGGG	Six4_2860.1	8	0.0272134	33.8262	0.671929	8	CACCTGGG	ATAAATGACACCTATCA	+
CACCTGGG	MA0162.1	0	0.0272539	33.8766	0.671929	8	CACCTGGG	TGCGTGGGCGT	+
CACCTGGG	Myf6_primary	4	0.0274813	34.1592	0.671929	8	CACCTGGG	CGGACACCTGTTCTTC	-
CACCTGGG	V_USF_01	4	0.028003	34.8078	0.671929	8	CACCTGGG	AGATCACGTGATCT	+
CACCTGGG	MA0253.1	0	0.0283334	35.2184	0.673254	8	CACCTGGG	CACTTGAAA	-
CACCTGGG	MA0141.1	1	0.0295263	36.7012	0.67521	8	CACCTGGG	TGACCTTGAGCT	-
CACCTGGG	V_MYB_Q6	2	0.0295995	36.7922	0.67521	8	CACCTGGG	CTCAACTGGC	+
CACCTGGG	Ascl2_primary	6	0.0302465	37.5964	0.67521	8	CACCTGGG	CAGGAGCAGCTGCTGAG	-
CACCTGGG	V_MAX_01	4	0.0310448	38.5887	0.67521	8	CACCTGGG	AAACCACGTGGTTT	+
CACCTGGG	MA0342.1	0	0.031055	38.6013	0.67521	5	CACCTGGG	CCCCT	-
CACCTGGG	MA0366.1	0	0.031055	38.6013	0.67521	5	CACCTGGG	CCCCT	-
CACCTGGG	V_MYCMAX_03	7	0.0311745	38.7499	0.67521	8	CACCTGGG	CAAGTGACACGTGATACTTG	+
CACCTGGG	V_RFX1_01	4	0.0324305	40.3111	0.690199	8	CACCTGGG	TAGTAGCCTGGCAACAA	+
CACCTGGG	MA0146.1	2	0.0343716	42.7239	0.714247	8	CACCTGGG	GGGGCCGAGGCCTG	+
CACCTGGG	V_YY1_02	7	0.0346652	43.0888	0.714247	8	CACCTGGG	CCGCGGCCATCTTGGCTGCT	+
CACCTGGG	Tcfap2c_primary	2	0.0349213	43.4072	0.714247	8	CACCTGGG	TTCGCCTCAGGCAAT	-
CACCTGGG	Tcfap2e_primary	2	0.0349213	43.4072	0.714247	8	CACCTGGG	ATTGCCTGAGGCGAT	+
CACCTGGG	V_TAL1BETAE47_01	5	0.0350196	43.5294	0.714247	8	CACCTGGG	CCGACCATCTGTTCAG	-
CACCTGGG	Tcfap2c_secondary	3	0.0355478	44.1859	0.719027	8	CACCTGGG	CTGCCCTTGGGCGG	-
CACCTGGG	Tcfap2a_primary	2	0.036125	44.9033	0.724712	8	CACCTGGG	TTCCCCTCAGGGAAT	-
CACCTGGG	V_ARNT_01	5	0.0374909	46.6012	0.734064	8	CACCTGGG	GTTGTCACGTGCCCGC	+
CACCTGGG	V_NKX25_01	0	0.0383479	47.6664	0.744885	7	CACCTGGG	CACTTGA	-
CAGGTGCC	MA0086.1	0	5.49889e-06	0.00683512	0.0135084	6	CAGGTGCC	CAGGTG	+
CAGGTGCC	I_SN_01	4	5.12608e-05	0.0637171	0.0539487	8	CAGGTGCC	GAAACAGGTGCAC	+
CAGGTGCC	V_AREB6_03	3	6.85585e-05	0.0852182	0.0539487	8	CAGGTGCC	GCACAGGTGCAG	-
CAGGTGCC	V_MYOD_Q6	2	0.000121847	0.151456	0.0539487	8	CAGGTGCC	GACAGGTGGT	-
CAGGTGCC	V_LMO2COM_01	3	0.0001274	0.158358	0.0539487	8	CAGGTGCC	CGCCAGGTGCTG	+
CAGGTGCC	MA0103.1	0	0.000131766	0.163785	0.0539487	6	CAGGTGCC	CAGGTG	-
CAGGTGCC	Tcfe2a_primary	5	0.000170799	0.212303	0.0599399	8	CAGGTGCC	ATCCACAGGTGCGAAAA	+
CAGGTGCC	V_MYOD_01	3	0.000287773	0.357702	0.0798995	8	CAGGTGCC	CAACAGGTGGTG	+
CAGGTGCC	MA0449.1	2	0.000325249	0.404284	0.0798995	8	CAGGTGCC	GGCACGTGCC	+
CAGGTGCC	Myf6_primary	6	0.000392616	0.488022	0.0876806	8	CAGGTGCC	GAAGAACAGGTGTCCG	+
CAGGTGCC	V_E47_01	4	0.00099962	1.24253	0.204636	8	CAGGTGCC	ACGGCAGGTGTCCCC	+
CAGGTGCC	P_RAV1_02	4	0.00140017	1.74042	0.264586	8	CAGGTGCC	GCCTCAGGTGAT	-
CAGGTGCC	MA0055.1	3	0.00190873	2.37255	0.334923	8	CAGGTGCC	CAGCAGCTGCTG	-
CAGGTGCC	I_SN_02	6	0.00219565	2.72919	0.347327	8	CAGGTGCC	TGCAAACAGGTGGT	-
CAGGTGCC	Ascl2_primary	5	0.00226219	2.81191	0.347327	8	CAGGTGCC	CTCAGCAGCTGCTCCTG	+
CAGGTGCC	MA0376.1	7	0.00243524	3.027	0.348713	8	CAGGTGCC	ATATTAGCACGTGCTTAGTC	+
CAGGTGCC	Pknox2_3077.2	7	0.00255512	3.17602	0.348713	8	CAGGTGCC	ATATTGACAGGTGCTT	-
CAGGTGCC	MA0147.1	2	0.00283629	3.52551	0.366713	8	CAGGTGCC	GCCACGTGCG	-
CAGGTGCC	V_E47_02	5	0.003321	4.128	0.388016	8	CAGGTGCC	AATAACAGGTGTTCAC	+
CAGGTGCC	V_NMYC_01	3	0.00332432	4.13214	0.388016	8	CAGGTGCC	TCCCACGTGTCA	+
CAGGTGCC	V_AREB6_02	3	0.00376411	4.67879	0.388016	8	CAGGTGCC	GTACAGGTGAAT	-
CAGGTGCC	Pknox1_2364.2	7	0.00394294	4.90107	0.388016	8	CAGGTGCC	GGATTGACAGGTCTTT	-
CAGGTGCC	MA0004.1	0	0.00423724	5.26689	0.388016	6	CAGGTGCC	CACGTG	+
CAGGTGCC	MA0104.2	2	0.00426466	5.30098	0.388016	8	CAGGTGCC	CGCACGTGGC	+
CAGGTGCC	V_ARNT_01	5	0.00466816	5.80252	0.389537	8	CAGGTGCC	GTTGTCACGTGCCCGC	+
CAGGTGCC	MA0119.1	5	0.00472529	5.87354	0.389537	8	CAGGTGCC	TTGGCATGGTGCCA	-
CAGGTGCC	V_DELTAEF1_01	2	0.00483063	6.00447	0.389537	8	CAGGTGCC	TTCAGGTGAGT	-
CAGGTGCC	V_HMX1_01	0	0.0050007	6.21587	0.389537	8	CAGGTGCC	CAAGTGCGTG	+
CAGGTGCC	Hic1_secondary	1	0.00507424	6.30728	0.389537	8	CAGGTGCC	GGGTGTGCCCAAAAGG	+
CAGGTGCC	Mrg1_2246.2	7	0.00528902	6.57425	0.393722	8	CAGGTGCC	GTATTGACAGGTCTTT	-
CAGGTGCC	P_PIF3_01	6	0.00640266	7.95851	0.39976	8	CAGGTGCC	AGTCGCCACGTGTCCCAC	-
CAGGTGCC	V_MIF1_01	1	0.00695085	8.6399	0.39976	8	CAGGTGCC	CCAGTTACCTAGCAACGA	-
CAGGTGCC	MA0048.1	3	0.00715713	8.89631	0.39976	8	CAGGTGCC	GCGCAGCTGCGT	+
CAGGTGCC	MA0407.1	7	0.00740496	9.20437	0.39976	8	CAGGTGCC	GTTCTTAGAGTTTCC	-
CAGGTGCC	V_AREB6_01	3	0.00749479	9.31602	0.39976	8	CAGGTGCC	ACACAGGTAAGTA	-
CAGGTGCC	V_USF_Q6	2	0.00766768	9.53093	0.39976	8	CAGGTGCC	GTCACGTGGC	+
CAGGTGCC	MA0059.1	2	0.00773964	9.62037	0.39976	8	CAGGTGCC	ACCACGTGGTC	-
CAGGTGCC	V_AP4_Q5	2	0.0079635	9.89864	0.39976	8	CAGGTGCC	ACCAGCTGAG	-
CAGGTGCC	MA0310.1	0	0.0080437	9.99832	0.39976	8	CAGGTGCC	CACGTGTC	-
CAGGTGCC	F_PHO4_01	3	0.00836405	10.3965	0.39976	8	CAGGTGCC	ACCCACGTGCTA	-
CAGGTGCC	MA0139.1	7	0.00853331	10.6069	0.39976	8	CAGGTGCC	TGGCCACCAGGGGGCGCTA	+
CAGGTGCC	Eomes_secondary	3	0.00860223	10.6926	0.39976	8	CAGGTGCC	GCGGAGGTGTCGCCTC	+
CAGGTGCC	V_USF_02	4	0.00862476	10.7206	0.39976	8	CAGGTGCC	AAATCACGTGATAT	+
CAGGTGCC	Meis1_2335.1	7	0.00968125	12.0338	0.440419	8	CAGGTGCC	GTATTGACAGCTCCTT	-
CAGGTGCC	P_GBP_Q6	3	0.0101282	12.5893	0.443561	8	CAGGTGCC	GGCCACGTGGCA	+
CAGGTGCC	Mrg2_2302.1	7	0.0104668	13.0102	0.443561	8	CAGGTGCC	GTATTGACAGGTAATT	-
CAGGTGCC	V_SREBP1_01	3	0.0104726	13.0174	0.443561	8	CAGGTGCC	GATCACGTGAC	+
CAGGTGCC	MA0213.1	0	0.0116749	14.5119	0.486104	8	CAGGTGCC	CTGGCGCC	+
CAGGTGCC	MA0269.1	5	0.0120814	15.0172	0.49177	8	CAGGTGCC	CCAATCGGGTGCAATATGTAA	-
CAGGTGCC	MA0155.1	3	0.0122113	15.1787	0.49177	8	CAGGTGCC	TGTCAGGGGGCG	+
CAGGTGCC	V_HAND1E47_01	5	0.012692	15.7762	0.502884	8	CAGGTGCC	AATGCCAGACGCCATT	-
CAGGTGCC	Tgif1_2342.2	8	0.0129682	16.1195	0.504571	8	CAGGTGCC	GATATTGACAGCTGCGT	+
CAGGTGCC	V_MYCMAX_02	3	0.0131454	16.3397	0.504571	8	CAGGTGCC	TACCACGTGTCA	+
CAGGTGCC	MA0093.1	0	0.0134414	16.7076	0.507995	7	CAGGTGCC	CACGTGG	+
CAGGTGCC	MA0409.1	0	0.0139652	17.3588	0.519795	7	CAGGTGCC	CACGTGA	+
CAGGTGCC	V_HEN1_02	8	0.0145212	18.0499	0.532424	8	CAGGTGCC	AGGGGGCGCAGCTGCGTCCCCT	+
CAGGTGCC	MA0264.1	3	0.0150794	18.7437	0.537536	8	CAGGTGCC	TTTCAAGTGGT	-
CAGGTGCC	V_HEN1_01	8	0.0150983	18.7672	0.537536	8	CAGGTGCC	ATGGGGCGCAGCTGCGCCCCTC	+
CAGGTGCC	I_HAIRY_01	4	0.0158489	19.7002	0.537712	8	CAGGTGCC	ATGGCGCGTGCCGC	-
CAGGTGCC	V_ARNT_02	7	0.0159788	19.8617	0.537712	8	CAGGTGCC	CAAAGGTCACGTGACCTTTG	+
CAGGTGCC	Bhlhb2_primary	8	0.0163146	20.279	0.541592	8	CAGGTGCC	GGAAGAGTCACGTGACCAATAC	+
CAGGTGCC	V_AP4_Q6	2	0.0183417	22.7987	0.582851	8	CAGGTGCC	CACAGCTGGT	+
CAGGTGCC	Rara_primary	0	0.0185065	23.0036	0.582851	8	CAGGTGCC	CAGGTGACCTTTGAGA	-
CAGGTGCC	Mybl1_secondary	4	0.019236	23.9103	0.591904	8	CAGGTGCC	CGACCAACTGCCGTG	+
CAGGTGCC	MA0270.1	0	0.0193207	24.0156	0.591904	8	CAGGTGCC	GGGGTGTG	-
CAGGTGCC	MA0249.1	3	0.0195168	24.2594	0.591904	8	CAGGTGCC	CAACATATGCGA	-
CAGGTGCC	Titf1_1722.2	5	0.0206525	25.6711	0.597553	8	CAGGTGCC	AATTTCAAGTGGCTTA	-
CAGGTGCC	V_RFX1_01	7	0.021155	26.2956	0.597553	8	CAGGTGCC	TTGTTGCCAGGCTACTA	-
CAGGTGCC	V_USF_01	4	0.0211625	26.305	0.597553	8	CAGGTGCC	AGATCACGTGATCT	+
CAGGTGCC	P_PIF3_02	6	0.0219406	27.2721	0.612483	8	CAGGTGCC	GCGGCCCACGTGGCCCT	-
CAGGTGCC	Myb_secondary	4	0.0230136	28.6059	0.632306	8	CAGGTGCC	CGACCAACTGCCATGC	+
CAGGTGCC	MA0395.1	3	0.0233184	28.9848	0.632306	8	CAGGTGCC	TGATCGGCGCCGCACGACGA	+
CAGGTGCC	Six4_2860.1	3	0.0235886	29.3206	0.632306	8	CAGGTGCC	TGATAGGTGTCATTTAT	-
CAGGTGCC	MA0116.1	7	0.0238503	29.646	0.632306	8	CAGGTGCC	GCACCCCTGGGTGCC	-
CAGGTGCC	V_MYCMAX_03	7	0.024195	30.0744	0.632306	8	CAGGTGCC	CAAGTGACACGTGATACTTG	+
CAGGTGCC	MA0058.1	1	0.025008	31.0849	0.632603	8	CAGGTGCC	TCACGTGGTC	-
CAGGTGCC	MA0324.1	0	0.025008	31.0849	0.632603	8	CAGGTGCC	CCGGTAACGG	-
CAGGTGCC	P_ANT_01	2	0.0252365	31.369	0.632603	8	CAGGTGCC	CACAGTTCCCGAGG	+
CAGGTGCC	V_MAX_01	4	0.0261299	32.4795	0.641898	8	CAGGTGCC	AAACCACGTGGTTT	+
CAGGTGCC	MA0100.1	0	0.0272762	33.9044	0.65812	8	CAGGTGCC	CAACGGCC	-
CAGGTGCC	MA0342.1	-1	0.031055	38.6013	0.7107	5	CAGGTGCC	AGGGG	+
CAGGTGCC	MA0366.1	-1	0.031055	38.6013	0.7107	5	CAGGTGCC	AGGGG	+
CAGGTGCC	MA0118.1	0	0.0323624	40.2265	0.7107	8	CAGGTGCC	TGGGGGGTC	+
CAGGTGCC	Tcfe2a_secondary	5	0.0324305	40.3111	0.7107	8	CAGGTGCC	AAGGCCAGATGGTCCGG	+
CAGGTGCC	Nkx2-2_2823.1	6	0.0324305	40.3111	0.7107	8	CAGGTGCC	AATTTTCAAGTGGTTAA	-
CAGGTGCC	MA0315.1	6	0.0326186	40.545	0.7107	8	CAGGTGCC	ACCAATCAGAGGCGA	+
CAGGTGCC	V_MYB_Q6	2	0.0326916	40.6357	0.7107	8	CAGGTGCC	GCCAGTTGAC	-
CACCCACC	MA0073.1	8	0.000221595	0.275442	0.550884	8	CACCCACC	CCCCAAACCACCCCCCCCCC	+
CACCCACC	V_PAX4_03	2	0.00111613	1.38735	0.710883	8	CACCCACC	AATCCCCACCCC	+
CACCCACC	MA0436.1	-1	0.00135503	1.68431	0.710883	7	CACCCACC	CCCCACG	+
CACCCACC	V_NGFIC_01	1	0.00140017	1.74042	0.710883	8	CACCCACC	CCGCCCACGCAT	-
CACCCACC	Sox13_secondary	3	0.00142977	1.77721	0.710883	8	CACCCACC	AAATACCCACCCAATAC	-
TGGGTGAT	V_SREBP1_02	2	0.000284481	0.353609	0.371693	8	TGGGTGAT	GTGGGGTGATA	-
TGGGTGAT	V_ZIC3_01	0	0.000299029	0.371693	0.371693	8	TGGGTGAT	TGGGTGGTC	+
TGGGTGAT	V_ZIC1_01	0	0.000826862	1.02779	0.61788	8	TGGGTGAT	TGGGTGGTC	+
TGGGTGAT	V_ZIC2_01	0	0.000994175	1.23576	0.61788	8	TGGGTGAT	GGGGTGGTC	+
ACCCCAGC	V_AP4_01	3	0.000387441	0.481589	0.696147	8	ACCCCAGC	CTGACCACAGCTGACTCT	-
ACCCCAGC	F_ADR1_01	0	0.000794928	0.988095	0.696147	6	ACCCCAGC	ACCCCA	-
ACCCCAGC	MA0268.1	0	0.00108549	1.34927	0.696147	7	ACCCCAGC	ACCCCAC	+
ACCCCAGC	MA0337.1	0	0.00124974	1.55343	0.696147	7	ACCCCAGC	CCCCCGC	+
ACCCCAGC	Six1_0935.2	9	0.00198303	2.4649	0.696147	8	ACCCCAGC	AAAAATGATACCCCATC	-
ACCCCAGC	MA0344.1	0	0.00212916	2.64655	0.696147	8	ACCCCAGC	TCCCCGGC	-
ACCCCAGC	MA0332.1	-1	0.00222465	2.76523	0.696147	6	ACCCCAGC	CCACAG	-
ACCCCAGC	MA0002.2	2	0.00263474	3.27498	0.696147	8	ACCCCAGC	AAACCACAGAC	-
ACCCCAGC	MA0154.1	0	0.00275694	3.42687	0.696147	8	ACCCCAGC	ACCCAAGGGA	+
ACCCCAGC	MA0436.1	-1	0.00280205	3.48295	0.696147	7	ACCCCAGC	CCCCACG	+
TGGGGTGT	V_SREBP1_02	1	0.000138303	0.171911	0.343604	8	TGGGGTGT	GTGGGGTGATA	-
TGGGGTGT	Glis2_primary	3	0.000711807	0.884777	0.618415	8	TGGGGTGT	CTGTGGGGGGTCGATA	-
TGGGGTGT	F_ADR1_01	0	0.000746751	0.928211	0.618415	6	TGGGGTGT	TGGGGT	+
TGGGGTGT	Plagl1_secondary	2	0.00101214	1.25809	0.628646	8	TGGGGTGT	GCTGGGGGGTACCCCTT	+
TGGGGTGT	Six2_2307.2	2	0.00142108	1.7664	0.706112	8	TGGGGTGT	AATGGGGTATCACTTTT	+
CCTTGGCT	MA0368.1	-1	0.000257331	0.319862	0.639724	7	CCTTGGCT	CTTGGCG	-
CCTTGGCT	V_ROAZ_01	4	0.000645976	0.802948	0.664573	8	CCTTGGCT	GCACCCTTGGGTGC	-
CCTTGGCT	Esrra_primary	8	0.00116742	1.4511	0.664573	8	CCTTGGCT	TCGCATGACCTTGAATA	-
CCTTGGCT	MA0313.1	-2	0.00145238	1.80531	0.664573	5	CCTTGGCT	TTGGT	+
CCTTGGCT	MA0161.1	-2	0.00157455	1.95717	0.664573	6	CCTTGGCT	TTGGCA	+
CCTTGGCT	MA0141.1	3	0.00160396	1.99372	0.664573	8	CCTTGGCT	TGACCTTGAGCT	-
ACCCACCC	Sox13_secondary	4	2.75544e-05	0.0342501	0.0681797	8	ACCCACCC	AAATACCCACCCAATAC	-
ACCCACCC	V_PAX4_03	3	0.000189891	0.236035	0.20138	8	ACCCACCC	AATCCCCACCCC	+
ACCCACCC	P_P_01	0	0.000308429	0.383377	0.20138	8	ACCCACCC	ACCTACCCG	+
ACCCACCC	V_RREB1_01	5	0.000325545	0.404652	0.20138	8	ACCCACCC	CCCCAAACCACCCC	+
ACCCACCC	MA0073.1	5	0.000409359	0.508833	0.202581	8	ACCCACCC	CCCCAAACCACCCCCCCCCC	+
ACCCACCC	MA0039.2	1	0.000614378	0.763672	0.253367	8	ACCCACCC	GCCCCACCCA	-
ACCCACCC	Zic3_primary	0	0.000957922	1.1907	0.310753	8	ACCCACCC	ACCCCCCCGGGGGGG	-
ACCCACCC	Zic2_primary	0	0.00100471	1.24885	0.310753	8	ACCCACCC	ACCCCCCCGGGGGGG	-
ACCCACCC	V_NGFIC_01	2	0.00141094	1.7538	0.355327	8	ACCCACCC	CCGCCCACGCAT	-
ACCCACCC	MA0436.1	0	0.00143603	1.78498	0.355327	7	ACCCACCC	CCCCACG	+
ACCCACCC	Ascl2_secondary	4	0.00171188	2.12787	0.385075	8	ACCCACCC	CTATCCCCGCCCTATT	+
ACCCACCC	Zfp281_primary	2	0.00200673	2.49436	0.411955	8	ACCCACCC	TCCCCCCCCCCCCCC	+
ACCCACCC	V_ZIC2_01	0	0.00225466	2.80254	0.411955	8	ACCCACCC	GACCACCCC	-
ACCCACCC	V_SP1_01	0	0.00233084	2.89724	0.411955	8	ACCCACCC	ACCCCGCCCC	-
ACCCACCC	Bcl6b_secondary	2	0.003194	3.97014	0.436402	8	ACCCACCC	ATCCCCGCCCCTAAAA	+
ACCCACCC	MA0162.1	2	0.00324694	4.03594	0.436402	8	ACCCACCC	CCGCCCACGCA	-
ACCCACCC	V_ZIC3_01	0	0.00326731	4.06126	0.436402	8	ACCCACCC	GACCACCCA	-
ACCCACCC	V_SPZ1_01	5	0.00354234	4.40313	0.436402	8	ACCCACCC	GCCATACCCTCCTGC	-
ACCCACCC	V_ZIC1_01	0	0.00354268	4.40355	0.436402	8	ACCCACCC	GACCACCCA	-
ACCCACCC	V_MAZR_01	2	0.00364249	4.52761	0.436402	8	ACCCACCC	TGGCCCCCCCCCC	-
ACCCACCC	V_GC_01	3	0.00370374	4.60375	0.436402	8	ACCCACCC	CAGCCCCGCCCCCT	-
ACCCACCC	Egr1_secondary	4	0.00413188	5.13593	0.464346	8	ACCCACCC	CCAGTCCCACTCCGCA	-
ACCCACCC	MA0359.1	1	0.00431623	5.36507	0.464346	8	ACCCACCC	CACCCATACA	+
ACCCACCC	Glis2_primary	5	0.00489063	6.07905	0.501026	8	ACCCACCC	TATCGACCCCCCACAG	+
ACCCACCC	V_SP1_Q6	2	0.00506522	6.29607	0.501026	8	ACCCACCC	GGCCCCGCCCCCC	-
ACCCACCC	MA0079.2	0	0.00526464	6.54394	0.501026	8	ACCCACCC	CCCCGCCCCC	+
ACCCACCC	MA0130.1	0	0.00559321	6.95236	0.512581	6	ACCCACCC	ATCCAC	+
ACCCACCC	F_RAP1_C	3	0.00632314	7.85967	0.558779	8	ACCCACCC	AAAACCCATACATC	+
ACCCACCC	Zfp740_primary	2	0.00679636	8.44788	0.579887	8	ACCCACCC	CCCCCCCCCCCACTTG	+
ACCCACCC	V_EGR1_01	2	0.00721221	8.96478	0.594856	8	ACCCACCC	ACGCCCACGCAT	-
ACCCACCC	V_EGR2_01	2	0.00779646	9.691	0.622301	8	ACCCACCC	ACGCCCACGCAA	-
ACCCACCC	Plagl1_secondary	7	0.00813463	10.1113	0.622871	8	ACCCACCC	AAGGGGTACCCCCCAGC	-
ACCCACCC	Klf7_primary	4	0.00830706	10.3257	0.622871	8	ACCCACCC	TCGACCCCGCCCCTAT	+
ACCCACCC	V_EGR3_01	2	0.00875916	10.8876	0.637453	8	ACCCACCC	ACGCCCACGCAT	-
ACCCACCC	Sp4_primary	2	0.00992218	12.3333	0.701462	8	ACCCACCC	GGTCCCGCCCCCTTCTC	+
ACCCACCC	V_PAX4_04	21	0.0102083	12.6889	0.701642	8	ACCCACCC	AAAAATTAACCCAAAATCCAACCTCACCCC	+
CCAAGGAC	MA0138.2	7	0.000299783	0.37263	0.416251	8	CCAAGGAC	TTCAGCACCATGGACAGCGCC	+
CCAAGGAC	V_NRSF_01	7	0.000334877	0.416251	0.416251	8	CCAAGGAC	TTCAGCACCACGGACAGCGCC	+
CCTTGGCA	MA0368.1	-1	1.63126e-05	0.0202766	0.0405532	7	CCTTGGCA	CTTGGCG	-
CCTTGGCA	MA0161.1	-2	0.000130383	0.162066	0.162066	6	CCTTGGCA	TTGGCA	+
CCTTGGCA	V_NF1_Q6	0	0.000778383	0.96753	0.64502	8	CCTTGGCA	TCTTGGCAAGAAGCCAAA	+
CCTTGGCA	MA0141.1	3	0.0013391	1.6645	0.720549	8	CCTTGGCA	TGACCTTGAGCT	-
CCTTGGCA	MA0313.1	-2	0.00145238	1.80531	0.720549	5	CCTTGGCA	TTGGT	+
CCTTGGCA	Rfx4_primary	2	0.00173906	2.16165	0.720549	8	CCTTGGCA	TACCATAGCAACGGT	+
CCAAGGAC	MA0138.2	7	0.000299783	0.37263	0.416251	8	CCAAGGAC	TTCAGCACCATGGACAGCGCC	+
CCAAGGAC	V_NRSF_01	7	0.000334877	0.416251	0.416251	8	CCAAGGAC	TTCAGCACCACGGACAGCGCC	+
CCTTGGCT	MA0368.1	-1	0.000257331	0.319862	0.639724	7	CCTTGGCT	CTTGGCG	-
CCTTGGCT	V_ROAZ_01	4	0.000645976	0.802948	0.664573	8	CCTTGGCT	GCACCCTTGGGTGC	-
CCTTGGCT	Esrra_primary	8	0.00116742	1.4511	0.664573	8	CCTTGGCT	TCGCATGACCTTGAATA	-
CCTTGGCT	MA0313.1	-2	0.00145238	1.80531	0.664573	5	CCTTGGCT	TTGGT	+
CCTTGGCT	MA0161.1	-2	0.00157455	1.95717	0.664573	6	CCTTGGCT	TTGGCA	+
CCTTGGCT	MA0141.1	3	0.00160396	1.99372	0.664573	8	CCTTGGCT	TGACCTTGAGCT	-

## Sheet: 2E - SYN_FeaturesiRF
Element_id	Element_id_simplified	Class	CRE_normalized_mean	O_presence	S_presence	K_presence	E_presence	Position.4_O	Position.4_S	Position.4_K	Position.4_E	Position.3_O	Position.3_S	Position.3_K	Position.3_E	Position.2_O	Position.2_S	Position.2_K	Position.2_E	Position.1_O	Position.1_S	Position.1_K	Position.1_E
Sr-Of-Kf-Ef_synthetic	sOKE	4mer	12.465	TRUE	TRUE	TRUE	TRUE	FALSE	FALSE	FALSE	TRUE	FALSE	FALSE	TRUE	FALSE	TRUE	FALSE	FALSE	FALSE	FALSE	TRUE	FALSE	FALSE
Sf-Of-Kr-Ef_synthetic	SOkE	4mer	12.1713	TRUE	TRUE	TRUE	TRUE	FALSE	FALSE	FALSE	TRUE	FALSE	FALSE	TRUE	FALSE	TRUE	FALSE	FALSE	FALSE	FALSE	TRUE	FALSE	FALSE
Or-Sr-Kr-Ef_synthetic	oskE	4mer	12.0435	TRUE	TRUE	TRUE	TRUE	FALSE	FALSE	FALSE	TRUE	FALSE	FALSE	TRUE	FALSE	FALSE	TRUE	FALSE	FALSE	TRUE	FALSE	FALSE	FALSE
Sr-Of-Kr-Er_synthetic	sOke	4mer	11.9183	TRUE	TRUE	TRUE	TRUE	FALSE	FALSE	FALSE	TRUE	FALSE	FALSE	TRUE	FALSE	TRUE	FALSE	FALSE	FALSE	FALSE	TRUE	FALSE	FALSE
Or-Sf-Kf-Ef_synthetic	oSKE	4mer	11.5018	TRUE	TRUE	TRUE	TRUE	FALSE	FALSE	FALSE	TRUE	FALSE	FALSE	TRUE	FALSE	FALSE	TRUE	FALSE	FALSE	TRUE	FALSE	FALSE	FALSE
Sf-Of-Kf-Ef_synthetic	SOKE	4mer	10.8959	TRUE	TRUE	TRUE	TRUE	FALSE	FALSE	FALSE	TRUE	FALSE	FALSE	TRUE	FALSE	TRUE	FALSE	FALSE	FALSE	FALSE	TRUE	FALSE	FALSE
Sr-Of-Kr-Ef_synthetic	sOkE	4mer	10.888	TRUE	TRUE	TRUE	TRUE	FALSE	FALSE	FALSE	TRUE	FALSE	FALSE	TRUE	FALSE	TRUE	FALSE	FALSE	FALSE	FALSE	TRUE	FALSE	FALSE
Or-Sr-Kf-Er_synthetic	osKe	4mer	10.7121	TRUE	TRUE	TRUE	TRUE	FALSE	FALSE	FALSE	TRUE	FALSE	FALSE	TRUE	FALSE	FALSE	TRUE	FALSE	FALSE	TRUE	FALSE	FALSE	FALSE
Or-Sr-Kr-Er_synthetic	oske	4mer	10.6129	TRUE	TRUE	TRUE	TRUE	FALSE	FALSE	FALSE	TRUE	FALSE	FALSE	TRUE	FALSE	FALSE	TRUE	FALSE	FALSE	TRUE	FALSE	FALSE	FALSE
Sr-Of-Kf-Er_synthetic	sOKe	4mer	10.6091	TRUE	TRUE	TRUE	TRUE	FALSE	FALSE	FALSE	TRUE	FALSE	FALSE	TRUE	FALSE	TRUE	FALSE	FALSE	FALSE	FALSE	TRUE	FALSE	FALSE
Sr-Kr-Of-Ef_synthetic	skOE	4mer	10.6081	TRUE	TRUE	TRUE	TRUE	FALSE	FALSE	FALSE	TRUE	TRUE	FALSE	FALSE	FALSE	FALSE	FALSE	TRUE	FALSE	FALSE	TRUE	FALSE	FALSE
Sf-Of-Kr-Er_synthetic	SOke	4mer	10.3708	TRUE	TRUE	TRUE	TRUE	FALSE	FALSE	FALSE	TRUE	FALSE	FALSE	TRUE	FALSE	TRUE	FALSE	FALSE	FALSE	FALSE	TRUE	FALSE	FALSE
Or-Sr-Kf-Ef_synthetic	osKE	4mer	10.2354	TRUE	TRUE	TRUE	TRUE	FALSE	FALSE	FALSE	TRUE	FALSE	FALSE	TRUE	FALSE	FALSE	TRUE	FALSE	FALSE	TRUE	FALSE	FALSE	FALSE
Or-Kf-Sr-Ef_synthetic	oKsE	4mer	10.0058	TRUE	TRUE	TRUE	TRUE	FALSE	FALSE	FALSE	TRUE	FALSE	TRUE	FALSE	FALSE	FALSE	FALSE	TRUE	FALSE	TRUE	FALSE	FALSE	FALSE
Or-Sf-Kr-Er_synthetic	oSke	4mer	9.94383	TRUE	TRUE	TRUE	TRUE	FALSE	FALSE	FALSE	TRUE	FALSE	FALSE	TRUE	FALSE	FALSE	TRUE	FALSE	FALSE	TRUE	FALSE	FALSE	FALSE
Sf-Kr-Of-Ef_synthetic	SkOE	4mer	9.83513	TRUE	TRUE	TRUE	TRUE	FALSE	FALSE	FALSE	TRUE	TRUE	FALSE	FALSE	FALSE	FALSE	FALSE	TRUE	FALSE	FALSE	TRUE	FALSE	FALSE
Sr-Ef-Of-Kr_synthetic	sEOk	4mer	9.81556	TRUE	TRUE	TRUE	TRUE	FALSE	FALSE	TRUE	FALSE	TRUE	FALSE	FALSE	FALSE	FALSE	FALSE	FALSE	TRUE	FALSE	TRUE	FALSE	FALSE
Sf-Kr-Of-Er_synthetic	SkOe	4mer	9.71056	TRUE	TRUE	TRUE	TRUE	FALSE	FALSE	FALSE	TRUE	TRUE	FALSE	FALSE	FALSE	FALSE	FALSE	TRUE	FALSE	FALSE	TRUE	FALSE	FALSE
Ef-Sr-Of-Kr_synthetic	EsOk	4mer	9.65468	TRUE	TRUE	TRUE	TRUE	FALSE	FALSE	TRUE	FALSE	TRUE	FALSE	FALSE	FALSE	FALSE	TRUE	FALSE	FALSE	FALSE	FALSE	FALSE	TRUE
Sf-Of-Kf-Er_synthetic	SOKe	4mer	9.48238	TRUE	TRUE	TRUE	TRUE	FALSE	FALSE	FALSE	TRUE	FALSE	FALSE	TRUE	FALSE	TRUE	FALSE	FALSE	FALSE	FALSE	TRUE	FALSE	FALSE
Sr-Kf-Of-Ef_synthetic	sKOE	4mer	9.41457	TRUE	TRUE	TRUE	TRUE	FALSE	FALSE	FALSE	TRUE	TRUE	FALSE	FALSE	FALSE	FALSE	FALSE	TRUE	FALSE	FALSE	TRUE	FALSE	FALSE
Or-Kf-Sf-Er_synthetic	oKSe	4mer	9.38819	TRUE	TRUE	TRUE	TRUE	FALSE	FALSE	FALSE	TRUE	FALSE	TRUE	FALSE	FALSE	FALSE	FALSE	TRUE	FALSE	TRUE	FALSE	FALSE	FALSE
Kr-Sr-Of-Er_synthetic	ksOe	4mer	9.35413	TRUE	TRUE	TRUE	TRUE	FALSE	FALSE	FALSE	TRUE	TRUE	FALSE	FALSE	FALSE	FALSE	TRUE	FALSE	FALSE	FALSE	FALSE	TRUE	FALSE
Sf-Kf-Of-Ef_synthetic	SKOE	4mer	9.33761	TRUE	TRUE	TRUE	TRUE	FALSE	FALSE	FALSE	TRUE	TRUE	FALSE	FALSE	FALSE	FALSE	FALSE	TRUE	FALSE	FALSE	TRUE	FALSE	FALSE
Kr-Sr-Of-Ef_synthetic	ksOE	4mer	9.29679	TRUE	TRUE	TRUE	TRUE	FALSE	FALSE	FALSE	TRUE	TRUE	FALSE	FALSE	FALSE	FALSE	TRUE	FALSE	FALSE	FALSE	FALSE	TRUE	FALSE
Or-Sf-Kr-Ef_synthetic	oSkE	4mer	9.26041	TRUE	TRUE	TRUE	TRUE	FALSE	FALSE	FALSE	TRUE	FALSE	FALSE	TRUE	FALSE	FALSE	TRUE	FALSE	FALSE	TRUE	FALSE	FALSE	FALSE
Ef-Sr-Of-Kf_synthetic	EsOK	4mer	9.02401	TRUE	TRUE	TRUE	TRUE	FALSE	FALSE	TRUE	FALSE	TRUE	FALSE	FALSE	FALSE	FALSE	TRUE	FALSE	FALSE	FALSE	FALSE	FALSE	TRUE
Or-Kf-Sr-Er_synthetic	oKse	4mer	8.93232	TRUE	TRUE	TRUE	TRUE	FALSE	FALSE	FALSE	TRUE	FALSE	TRUE	FALSE	FALSE	FALSE	FALSE	TRUE	FALSE	TRUE	FALSE	FALSE	FALSE
Kf-Sr-Of-Er_synthetic	KsOe	4mer	8.83093	TRUE	TRUE	TRUE	TRUE	FALSE	FALSE	FALSE	TRUE	TRUE	FALSE	FALSE	FALSE	FALSE	TRUE	FALSE	FALSE	FALSE	FALSE	TRUE	FALSE
Sr-Or-Kf-Ef_synthetic	soKE	4mer	8.80499	TRUE	TRUE	TRUE	TRUE	FALSE	FALSE	FALSE	TRUE	FALSE	FALSE	TRUE	FALSE	TRUE	FALSE	FALSE	FALSE	FALSE	TRUE	FALSE	FALSE
Sr-Kf-Of-Er_synthetic	sKOe	4mer	8.76066	TRUE	TRUE	TRUE	TRUE	FALSE	FALSE	FALSE	TRUE	TRUE	FALSE	FALSE	FALSE	FALSE	FALSE	TRUE	FALSE	FALSE	TRUE	FALSE	FALSE
Sr-Kr-Of-Er_synthetic	skOe	4mer	8.73357	TRUE	TRUE	TRUE	TRUE	FALSE	FALSE	FALSE	TRUE	TRUE	FALSE	FALSE	FALSE	FALSE	FALSE	TRUE	FALSE	FALSE	TRUE	FALSE	FALSE
Or-Sf-Kf-Er_synthetic	oSKe	4mer	8.649	TRUE	TRUE	TRUE	TRUE	FALSE	FALSE	FALSE	TRUE	FALSE	FALSE	TRUE	FALSE	FALSE	TRUE	FALSE	FALSE	TRUE	FALSE	FALSE	FALSE
Or-Kr-Sf-Er_synthetic	okSe	4mer	8.63074	TRUE	TRUE	TRUE	TRUE	FALSE	FALSE	FALSE	TRUE	FALSE	TRUE	FALSE	FALSE	FALSE	FALSE	TRUE	FALSE	TRUE	FALSE	FALSE	FALSE
Er-Sf-Of-Kr_synthetic	eSOk	4mer	8.31203	TRUE	TRUE	TRUE	TRUE	FALSE	FALSE	TRUE	FALSE	TRUE	FALSE	FALSE	FALSE	FALSE	TRUE	FALSE	FALSE	FALSE	FALSE	FALSE	TRUE
Sr-Of-Er-Kr_synthetic	sOek	4mer	8.25274	TRUE	TRUE	TRUE	TRUE	FALSE	FALSE	TRUE	FALSE	FALSE	FALSE	FALSE	TRUE	TRUE	FALSE	FALSE	FALSE	FALSE	TRUE	FALSE	FALSE
Sf-Kf-Of-Er_synthetic	SKOe	4mer	8.22435	TRUE	TRUE	TRUE	TRUE	FALSE	FALSE	FALSE	TRUE	TRUE	FALSE	FALSE	FALSE	FALSE	FALSE	TRUE	FALSE	FALSE	TRUE	FALSE	FALSE
Kr-Sf-Of-Ef_synthetic	kSOE	4mer	8.22022	TRUE	TRUE	TRUE	TRUE	FALSE	FALSE	FALSE	TRUE	TRUE	FALSE	FALSE	FALSE	FALSE	TRUE	FALSE	FALSE	FALSE	FALSE	TRUE	FALSE
Kf-Sf-Of-Ef_synthetic	KSOE	4mer	8.13893	TRUE	TRUE	TRUE	TRUE	FALSE	FALSE	FALSE	TRUE	TRUE	FALSE	FALSE	FALSE	FALSE	TRUE	FALSE	FALSE	FALSE	FALSE	TRUE	FALSE
Ef-Sf-Of-Kr_synthetic	ESOk	4mer	8.13813	TRUE	TRUE	TRUE	TRUE	FALSE	FALSE	TRUE	FALSE	TRUE	FALSE	FALSE	FALSE	FALSE	TRUE	FALSE	FALSE	FALSE	FALSE	FALSE	TRUE
Or-Sr-Er-Kr_synthetic	osek	4mer	8.11487	TRUE	TRUE	TRUE	TRUE	FALSE	FALSE	TRUE	FALSE	FALSE	FALSE	FALSE	TRUE	FALSE	TRUE	FALSE	FALSE	TRUE	FALSE	FALSE	FALSE
Sf-Or-Kf-Ef_synthetic	SoKE	4mer	8.08628	TRUE	TRUE	TRUE	TRUE	FALSE	FALSE	FALSE	TRUE	FALSE	FALSE	TRUE	FALSE	TRUE	FALSE	FALSE	FALSE	FALSE	TRUE	FALSE	FALSE
Kf-Sr-Of-Ef_synthetic	KsOE	4mer	8.08558	TRUE	TRUE	TRUE	TRUE	FALSE	FALSE	FALSE	TRUE	TRUE	FALSE	FALSE	FALSE	FALSE	TRUE	FALSE	FALSE	FALSE	FALSE	TRUE	FALSE
Sf-Kf-Or-Ef_synthetic	SKoE	4mer	7.96305	TRUE	TRUE	TRUE	TRUE	FALSE	FALSE	FALSE	TRUE	TRUE	FALSE	FALSE	FALSE	FALSE	FALSE	TRUE	FALSE	FALSE	TRUE	FALSE	FALSE
Kf-Or-Sr-Er_synthetic	Kose	4mer	7.87858	TRUE	TRUE	TRUE	TRUE	FALSE	FALSE	FALSE	TRUE	FALSE	TRUE	FALSE	FALSE	TRUE	FALSE	FALSE	FALSE	FALSE	FALSE	TRUE	FALSE
Kf-Sf-Or-Ef_synthetic	KSoE	4mer	7.85195	TRUE	TRUE	TRUE	TRUE	FALSE	FALSE	FALSE	TRUE	TRUE	FALSE	FALSE	FALSE	FALSE	TRUE	FALSE	FALSE	FALSE	FALSE	TRUE	FALSE
Ef-Sf-Kr-Of_synthetic	ESkO	4mer	7.79733	TRUE	TRUE	TRUE	TRUE	TRUE	FALSE	FALSE	FALSE	FALSE	FALSE	TRUE	FALSE	FALSE	TRUE	FALSE	FALSE	FALSE	FALSE	FALSE	TRUE
Er-Sf-Kr-Or_synthetic	eSko	4mer	7.77777	TRUE	TRUE	TRUE	TRUE	TRUE	FALSE	FALSE	FALSE	FALSE	FALSE	TRUE	FALSE	FALSE	TRUE	FALSE	FALSE	FALSE	FALSE	FALSE	TRUE
Or-Kf-Sf-Ef_synthetic	oKSE	4mer	7.73423	TRUE	TRUE	TRUE	TRUE	FALSE	FALSE	FALSE	TRUE	FALSE	TRUE	FALSE	FALSE	FALSE	FALSE	TRUE	FALSE	TRUE	FALSE	FALSE	FALSE
Er-Sr-Of-Kr_synthetic	esOk	4mer	7.70269	TRUE	TRUE	TRUE	TRUE	FALSE	FALSE	TRUE	FALSE	TRUE	FALSE	FALSE	FALSE	FALSE	TRUE	FALSE	FALSE	FALSE	FALSE	FALSE	TRUE
Kf-Or-Sf-Er_synthetic	KoSe	4mer	7.69084	TRUE	TRUE	TRUE	TRUE	FALSE	FALSE	FALSE	TRUE	FALSE	TRUE	FALSE	FALSE	TRUE	FALSE	FALSE	FALSE	FALSE	FALSE	TRUE	FALSE
Or-Kr-Sf-Ef_synthetic	okSE	4mer	7.67968	TRUE	TRUE	TRUE	TRUE	FALSE	FALSE	FALSE	TRUE	FALSE	TRUE	FALSE	FALSE	FALSE	FALSE	TRUE	FALSE	TRUE	FALSE	FALSE	FALSE
Of-Sr-Kf-Ef_synthetic	OsKE	4mer	7.60865	TRUE	TRUE	TRUE	TRUE	FALSE	FALSE	FALSE	TRUE	FALSE	FALSE	TRUE	FALSE	FALSE	TRUE	FALSE	FALSE	TRUE	FALSE	FALSE	FALSE
Sr-Kf-Or-Ef_synthetic	sKoE	4mer	7.51963	TRUE	TRUE	TRUE	TRUE	FALSE	FALSE	FALSE	TRUE	TRUE	FALSE	FALSE	FALSE	FALSE	FALSE	TRUE	FALSE	FALSE	TRUE	FALSE	FALSE
Sr-Kr-Or-Er_synthetic	skoe	4mer	7.50843	TRUE	TRUE	TRUE	TRUE	FALSE	FALSE	FALSE	TRUE	TRUE	FALSE	FALSE	FALSE	FALSE	FALSE	TRUE	FALSE	FALSE	TRUE	FALSE	FALSE
Or-Kr-Sr-Ef_synthetic	oksE	4mer	7.45902	TRUE	TRUE	TRUE	TRUE	FALSE	FALSE	FALSE	TRUE	FALSE	TRUE	FALSE	FALSE	FALSE	FALSE	TRUE	FALSE	TRUE	FALSE	FALSE	FALSE
Kf-Sr-Or-Ef_synthetic	KsoE	4mer	7.45021	TRUE	TRUE	TRUE	TRUE	FALSE	FALSE	FALSE	TRUE	TRUE	FALSE	FALSE	FALSE	FALSE	TRUE	FALSE	FALSE	FALSE	FALSE	TRUE	FALSE
Sf-Kf-Or-Er_synthetic	SKoe	4mer	7.40329	TRUE	TRUE	TRUE	TRUE	FALSE	FALSE	FALSE	TRUE	TRUE	FALSE	FALSE	FALSE	FALSE	FALSE	TRUE	FALSE	FALSE	TRUE	FALSE	FALSE
Ef-Sf-Of-Kf_synthetic	ESOK	4mer	7.36845	TRUE	TRUE	TRUE	TRUE	FALSE	FALSE	TRUE	FALSE	TRUE	FALSE	FALSE	FALSE	FALSE	TRUE	FALSE	FALSE	FALSE	FALSE	FALSE	TRUE
Ef-Sr-Kr-Or_synthetic	Esko	4mer	7.36801	TRUE	TRUE	TRUE	TRUE	TRUE	FALSE	FALSE	FALSE	FALSE	FALSE	TRUE	FALSE	FALSE	TRUE	FALSE	FALSE	FALSE	FALSE	FALSE	TRUE
Kr-Sf-Of-Er_synthetic	kSOe	4mer	7.35509	TRUE	TRUE	TRUE	TRUE	FALSE	FALSE	FALSE	TRUE	TRUE	FALSE	FALSE	FALSE	FALSE	TRUE	FALSE	FALSE	FALSE	FALSE	TRUE	FALSE
Sr-Kf-Or-Er_synthetic	sKoe	4mer	7.31829	TRUE	TRUE	TRUE	TRUE	FALSE	FALSE	FALSE	TRUE	TRUE	FALSE	FALSE	FALSE	FALSE	FALSE	TRUE	FALSE	FALSE	TRUE	FALSE	FALSE
Sf-Kr-Or-Ef_synthetic	SkoE	4mer	7.26527	TRUE	TRUE	TRUE	TRUE	FALSE	FALSE	FALSE	TRUE	TRUE	FALSE	FALSE	FALSE	FALSE	FALSE	TRUE	FALSE	FALSE	TRUE	FALSE	FALSE
Sr-Or-Kr-Ef_synthetic	sokE	4mer	7.24785	TRUE	TRUE	TRUE	TRUE	FALSE	FALSE	FALSE	TRUE	FALSE	FALSE	TRUE	FALSE	TRUE	FALSE	FALSE	FALSE	FALSE	TRUE	FALSE	FALSE
Sf-Or-Kf-Er_synthetic	SoKe	4mer	7.23349	TRUE	TRUE	TRUE	TRUE	FALSE	FALSE	FALSE	TRUE	FALSE	FALSE	TRUE	FALSE	TRUE	FALSE	FALSE	FALSE	FALSE	TRUE	FALSE	FALSE
Sf-Or-Kr-Ef_synthetic	SokE	4mer	7.22993	TRUE	TRUE	TRUE	TRUE	FALSE	FALSE	FALSE	TRUE	FALSE	FALSE	TRUE	FALSE	TRUE	FALSE	FALSE	FALSE	FALSE	TRUE	FALSE	FALSE
Kr-Or-Sr-Er_synthetic	kose	4mer	7.20423	TRUE	TRUE	TRUE	TRUE	FALSE	FALSE	FALSE	TRUE	FALSE	TRUE	FALSE	FALSE	TRUE	FALSE	FALSE	FALSE	FALSE	FALSE	TRUE	FALSE
Sr-Er-Of-Kr_synthetic	seOk	4mer	7.18298	TRUE	TRUE	TRUE	TRUE	FALSE	FALSE	TRUE	FALSE	TRUE	FALSE	FALSE	FALSE	FALSE	FALSE	FALSE	TRUE	FALSE	TRUE	FALSE	FALSE
Er-Sf-Of-Kf_synthetic	eSOK	4mer	7.03387	TRUE	TRUE	TRUE	TRUE	FALSE	FALSE	TRUE	FALSE	TRUE	FALSE	FALSE	FALSE	FALSE	TRUE	FALSE	FALSE	FALSE	FALSE	FALSE	TRUE
Sr-Kr-Or-Ef_synthetic	skoE	4mer	7.02785	TRUE	TRUE	TRUE	TRUE	FALSE	FALSE	FALSE	TRUE	TRUE	FALSE	FALSE	FALSE	FALSE	FALSE	TRUE	FALSE	FALSE	TRUE	FALSE	FALSE
Ef-Sf-Kr-Or_synthetic	ESko	4mer	7.0045	TRUE	TRUE	TRUE	TRUE	TRUE	FALSE	FALSE	FALSE	FALSE	FALSE	TRUE	FALSE	FALSE	TRUE	FALSE	FALSE	FALSE	FALSE	FALSE	TRUE
Kf-Sf-Of-Er_synthetic	KSOe	4mer	6.99219	TRUE	TRUE	TRUE	TRUE	FALSE	FALSE	FALSE	TRUE	TRUE	FALSE	FALSE	FALSE	FALSE	TRUE	FALSE	FALSE	FALSE	FALSE	TRUE	FALSE
Kf-Sf-Or-Er_synthetic	KSoe	4mer	6.97419	TRUE	TRUE	TRUE	TRUE	FALSE	FALSE	FALSE	TRUE	TRUE	FALSE	FALSE	FALSE	FALSE	TRUE	FALSE	FALSE	FALSE	FALSE	TRUE	FALSE
Sr-Of-Ef-Kr_synthetic	sOEk	4mer	6.95596	TRUE	TRUE	TRUE	TRUE	FALSE	FALSE	TRUE	FALSE	FALSE	FALSE	FALSE	TRUE	TRUE	FALSE	FALSE	FALSE	FALSE	TRUE	FALSE	FALSE
Sr-Ef-Of-Kf_synthetic	sEOK	4mer	6.94855	TRUE	TRUE	TRUE	TRUE	FALSE	FALSE	TRUE	FALSE	TRUE	FALSE	FALSE	FALSE	FALSE	FALSE	FALSE	TRUE	FALSE	TRUE	FALSE	FALSE
Sf-Or-Kr-Er_synthetic	Soke	4mer	6.91327	TRUE	TRUE	TRUE	TRUE	FALSE	FALSE	FALSE	TRUE	FALSE	FALSE	TRUE	FALSE	TRUE	FALSE	FALSE	FALSE	FALSE	TRUE	FALSE	FALSE
Or-Kr-Sr-Er_synthetic	okse	4mer	6.90724	TRUE	TRUE	TRUE	TRUE	FALSE	FALSE	FALSE	TRUE	FALSE	TRUE	FALSE	FALSE	FALSE	FALSE	TRUE	FALSE	TRUE	FALSE	FALSE	FALSE
Sr-Er-Kr-Or_synthetic	seko	4mer	6.86724	TRUE	TRUE	TRUE	TRUE	TRUE	FALSE	FALSE	FALSE	FALSE	FALSE	TRUE	FALSE	FALSE	FALSE	FALSE	TRUE	FALSE	TRUE	FALSE	FALSE
Sf-Ef-Of-Kr_synthetic	SEOk	4mer	6.8034	TRUE	TRUE	TRUE	TRUE	FALSE	FALSE	TRUE	FALSE	TRUE	FALSE	FALSE	FALSE	FALSE	FALSE	FALSE	TRUE	FALSE	TRUE	FALSE	FALSE
Of-Sr-Kr-Ef_synthetic	OskE	4mer	6.7799	TRUE	TRUE	TRUE	TRUE	FALSE	FALSE	FALSE	TRUE	FALSE	FALSE	TRUE	FALSE	FALSE	TRUE	FALSE	FALSE	TRUE	FALSE	FALSE	FALSE
Sf-Kr-Ef-Or_synthetic	SkEo	4mer	6.7488	TRUE	TRUE	TRUE	TRUE	TRUE	FALSE	FALSE	FALSE	FALSE	FALSE	FALSE	TRUE	FALSE	FALSE	TRUE	FALSE	FALSE	TRUE	FALSE	FALSE
Or-Sf-Er-Kr_synthetic	oSek	4mer	6.71543	TRUE	TRUE	TRUE	TRUE	FALSE	FALSE	TRUE	FALSE	FALSE	FALSE	FALSE	TRUE	FALSE	TRUE	FALSE	FALSE	TRUE	FALSE	FALSE	FALSE
Sr-Or-Kr-Er_synthetic	soke	4mer	6.66257	TRUE	TRUE	TRUE	TRUE	FALSE	FALSE	FALSE	TRUE	FALSE	FALSE	TRUE	FALSE	TRUE	FALSE	FALSE	FALSE	FALSE	TRUE	FALSE	FALSE
Sf-Of-Ef-Kr_synthetic	SOEk	4mer	6.64204	TRUE	TRUE	TRUE	TRUE	FALSE	FALSE	TRUE	FALSE	FALSE	FALSE	FALSE	TRUE	TRUE	FALSE	FALSE	FALSE	FALSE	TRUE	FALSE	FALSE
Ef-Sr-Kr-Of_synthetic	EskO	4mer	6.61573	TRUE	TRUE	TRUE	TRUE	TRUE	FALSE	FALSE	FALSE	FALSE	FALSE	TRUE	FALSE	FALSE	TRUE	FALSE	FALSE	FALSE	FALSE	FALSE	TRUE
Ef-Sr-Kf-Of_synthetic	EsKO	4mer	6.59524	TRUE	TRUE	TRUE	TRUE	TRUE	FALSE	FALSE	FALSE	FALSE	FALSE	TRUE	FALSE	FALSE	TRUE	FALSE	FALSE	FALSE	FALSE	FALSE	TRUE
Ef-Sr-Kf-Or_synthetic	EsKo	4mer	6.56179	TRUE	TRUE	TRUE	TRUE	TRUE	FALSE	FALSE	FALSE	FALSE	FALSE	TRUE	FALSE	FALSE	TRUE	FALSE	FALSE	FALSE	FALSE	FALSE	TRUE
Sf-Of-Ef-Kf_synthetic	SOEK	4mer	6.55476	TRUE	TRUE	TRUE	TRUE	FALSE	FALSE	TRUE	FALSE	FALSE	FALSE	FALSE	TRUE	TRUE	FALSE	FALSE	FALSE	FALSE	TRUE	FALSE	FALSE
Or-Er-Sr-Kr_synthetic	oesk	4mer	6.5067	TRUE	TRUE	TRUE	TRUE	FALSE	FALSE	TRUE	FALSE	FALSE	TRUE	FALSE	FALSE	FALSE	FALSE	FALSE	TRUE	TRUE	FALSE	FALSE	FALSE
Kf-Or-Sf-Ef_synthetic	KoSE	4mer	6.49137	TRUE	TRUE	TRUE	TRUE	FALSE	FALSE	FALSE	TRUE	FALSE	TRUE	FALSE	FALSE	TRUE	FALSE	FALSE	FALSE	FALSE	FALSE	TRUE	FALSE
Sf-Er-Of-Kr_synthetic	SeOk	4mer	6.46769	TRUE	TRUE	TRUE	TRUE	FALSE	FALSE	TRUE	FALSE	TRUE	FALSE	FALSE	FALSE	FALSE	FALSE	FALSE	TRUE	FALSE	TRUE	FALSE	FALSE
Sr-Er-Kf-Or_synthetic	seKo	4mer	6.37803	TRUE	TRUE	TRUE	TRUE	TRUE	FALSE	FALSE	FALSE	FALSE	FALSE	TRUE	FALSE	FALSE	FALSE	FALSE	TRUE	FALSE	TRUE	FALSE	FALSE
Sr-Ef-Kr-Or_synthetic	sEko	4mer	6.32051	TRUE	TRUE	TRUE	TRUE	TRUE	FALSE	FALSE	FALSE	FALSE	FALSE	TRUE	FALSE	FALSE	FALSE	FALSE	TRUE	FALSE	TRUE	FALSE	FALSE
Kr-Sr-Or-Ef_synthetic	ksoE	4mer	6.29245	TRUE	TRUE	TRUE	TRUE	FALSE	FALSE	FALSE	TRUE	TRUE	FALSE	FALSE	FALSE	FALSE	TRUE	FALSE	FALSE	FALSE	FALSE	TRUE	FALSE
Sf-Of-Er-Kr_synthetic	SOek	4mer	6.24533	TRUE	TRUE	TRUE	TRUE	FALSE	FALSE	TRUE	FALSE	FALSE	FALSE	FALSE	TRUE	TRUE	FALSE	FALSE	FALSE	FALSE	TRUE	FALSE	FALSE
Sr-Kf-Ef-Of_synthetic	sKEO	4mer	6.24106	TRUE	TRUE	TRUE	TRUE	TRUE	FALSE	FALSE	FALSE	FALSE	FALSE	FALSE	TRUE	FALSE	FALSE	TRUE	FALSE	FALSE	TRUE	FALSE	FALSE
Sf-Ef-Of-Kf_synthetic	SEOK	4mer	6.2212	TRUE	TRUE	TRUE	TRUE	FALSE	FALSE	TRUE	FALSE	TRUE	FALSE	FALSE	FALSE	FALSE	FALSE	FALSE	TRUE	FALSE	TRUE	FALSE	FALSE
Kr-Sf-Or-Ef_synthetic	kSoE	4mer	6.21821	TRUE	TRUE	TRUE	TRUE	FALSE	FALSE	FALSE	TRUE	TRUE	FALSE	FALSE	FALSE	FALSE	TRUE	FALSE	FALSE	FALSE	FALSE	TRUE	FALSE
Er-Sr-Of-Kf_synthetic	esOK	4mer	6.20273	TRUE	TRUE	TRUE	TRUE	FALSE	FALSE	TRUE	FALSE	TRUE	FALSE	FALSE	FALSE	FALSE	TRUE	FALSE	FALSE	FALSE	FALSE	FALSE	TRUE
Sr-Of-Er-Kf_synthetic	sOeK	4mer	6.13766	TRUE	TRUE	TRUE	TRUE	FALSE	FALSE	TRUE	FALSE	FALSE	FALSE	FALSE	TRUE	TRUE	FALSE	FALSE	FALSE	FALSE	TRUE	FALSE	FALSE
Sr-Er-Of-Kf_synthetic	seOK	4mer	6.13752	TRUE	TRUE	TRUE	TRUE	FALSE	FALSE	TRUE	FALSE	TRUE	FALSE	FALSE	FALSE	FALSE	FALSE	FALSE	TRUE	FALSE	TRUE	FALSE	FALSE
Kr-Or-Sr-Ef_synthetic	kosE	4mer	6.13297	TRUE	TRUE	TRUE	TRUE	FALSE	FALSE	FALSE	TRUE	FALSE	TRUE	FALSE	FALSE	TRUE	FALSE	FALSE	FALSE	FALSE	FALSE	TRUE	FALSE
Of-Kr-Sr-Ef_synthetic	OksE	4mer	6.12275	TRUE	TRUE	TRUE	TRUE	FALSE	FALSE	FALSE	TRUE	FALSE	TRUE	FALSE	FALSE	FALSE	FALSE	TRUE	FALSE	TRUE	FALSE	FALSE	FALSE
Ef-Sf-Or-Kr_synthetic	ESok	4mer	6.12209	TRUE	TRUE	TRUE	TRUE	FALSE	FALSE	TRUE	FALSE	TRUE	FALSE	FALSE	FALSE	FALSE	TRUE	FALSE	FALSE	FALSE	FALSE	FALSE	TRUE
Kf-Or-Sr-Ef_synthetic	KosE	4mer	6.11142	TRUE	TRUE	TRUE	TRUE	FALSE	FALSE	FALSE	TRUE	FALSE	TRUE	FALSE	FALSE	TRUE	FALSE	FALSE	FALSE	FALSE	FALSE	TRUE	FALSE
Kr-Or-Sf-Er_synthetic	koSe	4mer	6.09574	TRUE	TRUE	TRUE	TRUE	FALSE	FALSE	FALSE	TRUE	FALSE	TRUE	FALSE	FALSE	TRUE	FALSE	FALSE	FALSE	FALSE	FALSE	TRUE	FALSE
Or-Sr-Er-Kf_synthetic	oseK	4mer	6.08943	TRUE	TRUE	TRUE	TRUE	FALSE	FALSE	TRUE	FALSE	FALSE	FALSE	FALSE	TRUE	FALSE	TRUE	FALSE	FALSE	TRUE	FALSE	FALSE	FALSE
Sr-Of-Ef-Kf_synthetic	sOEK	4mer	6.07719	TRUE	TRUE	TRUE	TRUE	FALSE	FALSE	TRUE	FALSE	FALSE	FALSE	FALSE	TRUE	TRUE	FALSE	FALSE	FALSE	FALSE	TRUE	FALSE	FALSE
Of-Sr-Kr-Er_synthetic	Oske	4mer	6.06956	TRUE	TRUE	TRUE	TRUE	FALSE	FALSE	FALSE	TRUE	FALSE	FALSE	TRUE	FALSE	FALSE	TRUE	FALSE	FALSE	TRUE	FALSE	FALSE	FALSE
Ef-Sf-Kf-Or_synthetic	ESKo	4mer	6.04759	TRUE	TRUE	TRUE	TRUE	TRUE	FALSE	FALSE	FALSE	FALSE	FALSE	TRUE	FALSE	FALSE	TRUE	FALSE	FALSE	FALSE	FALSE	FALSE	TRUE
Kr-Sf-Or-Er_synthetic	kSoe	4mer	6.0287	TRUE	TRUE	TRUE	TRUE	FALSE	FALSE	FALSE	TRUE	TRUE	FALSE	FALSE	FALSE	FALSE	TRUE	FALSE	FALSE	FALSE	FALSE	TRUE	FALSE
Or-Er-Sr-Kf_synthetic	oesK	4mer	6.02546	TRUE	TRUE	TRUE	TRUE	FALSE	FALSE	TRUE	FALSE	FALSE	TRUE	FALSE	FALSE	FALSE	FALSE	FALSE	TRUE	TRUE	FALSE	FALSE	FALSE
Of-Kf-Sr-Ef_synthetic	OKsE	4mer	6.02536	TRUE	TRUE	TRUE	TRUE	FALSE	FALSE	FALSE	TRUE	FALSE	TRUE	FALSE	FALSE	FALSE	FALSE	TRUE	FALSE	TRUE	FALSE	FALSE	FALSE
Er-Sr-Kf-Or_synthetic	esKo	4mer	6.00696	TRUE	TRUE	TRUE	TRUE	TRUE	FALSE	FALSE	FALSE	FALSE	FALSE	TRUE	FALSE	FALSE	TRUE	FALSE	FALSE	FALSE	FALSE	FALSE	TRUE
Sf-Er-Or-Kr_synthetic	Seok	4mer	5.97988	TRUE	TRUE	TRUE	TRUE	FALSE	FALSE	TRUE	FALSE	TRUE	FALSE	FALSE	FALSE	FALSE	FALSE	FALSE	TRUE	FALSE	TRUE	FALSE	FALSE
Or-Kf-Ef-Sr_synthetic	oKEs	4mer	5.96134	TRUE	TRUE	TRUE	TRUE	FALSE	TRUE	FALSE	FALSE	FALSE	FALSE	FALSE	TRUE	FALSE	FALSE	TRUE	FALSE	TRUE	FALSE	FALSE	FALSE
Sr-Or-Kf-Er_synthetic	soKe	4mer	5.921	TRUE	TRUE	TRUE	TRUE	FALSE	FALSE	FALSE	TRUE	FALSE	FALSE	TRUE	FALSE	TRUE	FALSE	FALSE	FALSE	FALSE	TRUE	FALSE	FALSE
Or-Sr-Ef-Kr_synthetic	osEk	4mer	5.89604	TRUE	TRUE	TRUE	TRUE	FALSE	FALSE	TRUE	FALSE	FALSE	FALSE	FALSE	TRUE	FALSE	TRUE	FALSE	FALSE	TRUE	FALSE	FALSE	FALSE
Sr-Er-Or-Kr_synthetic	seok	4mer	5.87969	TRUE	TRUE	TRUE	TRUE	FALSE	FALSE	TRUE	FALSE	TRUE	FALSE	FALSE	FALSE	FALSE	FALSE	FALSE	TRUE	FALSE	TRUE	FALSE	FALSE
Or-Ef-Sr-Kr_synthetic	oEsk	4mer	5.81295	TRUE	TRUE	TRUE	TRUE	FALSE	FALSE	TRUE	FALSE	FALSE	TRUE	FALSE	FALSE	FALSE	FALSE	FALSE	TRUE	TRUE	FALSE	FALSE	FALSE
Sf-Of-Kr_synthetic	SOk	3mer	5.80901	TRUE	TRUE	TRUE	FALSE	FALSE	FALSE	TRUE	FALSE	TRUE	FALSE	FALSE	FALSE	FALSE	TRUE	FALSE	FALSE	FALSE	FALSE	FALSE	FALSE
Sf-Er-Kr-Or_synthetic	Seko	4mer	5.80411	TRUE	TRUE	TRUE	TRUE	TRUE	FALSE	FALSE	FALSE	FALSE	FALSE	TRUE	FALSE	FALSE	FALSE	FALSE	TRUE	FALSE	TRUE	FALSE	FALSE
Of-Sf-Kf-Ef_synthetic	OSKE	4mer	5.79605	TRUE	TRUE	TRUE	TRUE	FALSE	FALSE	FALSE	TRUE	FALSE	FALSE	TRUE	FALSE	FALSE	TRUE	FALSE	FALSE	TRUE	FALSE	FALSE	FALSE
Er-Sf-Kf-Or_synthetic	eSKo	4mer	5.79549	TRUE	TRUE	TRUE	TRUE	TRUE	FALSE	FALSE	FALSE	FALSE	FALSE	TRUE	FALSE	FALSE	TRUE	FALSE	FALSE	FALSE	FALSE	FALSE	TRUE
Sr-Kf-Ef-Or_synthetic	sKEo	4mer	5.7932	TRUE	TRUE	TRUE	TRUE	TRUE	FALSE	FALSE	FALSE	FALSE	FALSE	FALSE	TRUE	FALSE	FALSE	TRUE	FALSE	FALSE	TRUE	FALSE	FALSE
Sf-Ef-Kf-Or_synthetic	SEKo	4mer	5.7874	TRUE	TRUE	TRUE	TRUE	TRUE	FALSE	FALSE	FALSE	FALSE	FALSE	TRUE	FALSE	FALSE	FALSE	FALSE	TRUE	FALSE	TRUE	FALSE	FALSE
Sr-Kr-Er-Or_synthetic	skeo	4mer	5.77098	TRUE	TRUE	TRUE	TRUE	TRUE	FALSE	FALSE	FALSE	FALSE	FALSE	FALSE	TRUE	FALSE	FALSE	TRUE	FALSE	FALSE	TRUE	FALSE	FALSE
Kf-Sr-Ef-Or_synthetic	KsEo	4mer	5.74952	TRUE	TRUE	TRUE	TRUE	TRUE	FALSE	FALSE	FALSE	FALSE	FALSE	FALSE	TRUE	FALSE	TRUE	FALSE	FALSE	FALSE	FALSE	TRUE	FALSE
Sr-Kr-Ef-Or_synthetic	skEo	4mer	5.73962	TRUE	TRUE	TRUE	TRUE	TRUE	FALSE	FALSE	FALSE	FALSE	FALSE	FALSE	TRUE	FALSE	FALSE	TRUE	FALSE	FALSE	TRUE	FALSE	FALSE
Kr-Or-Sf-Ef_synthetic	koSE	4mer	5.71366	TRUE	TRUE	TRUE	TRUE	FALSE	FALSE	FALSE	TRUE	FALSE	TRUE	FALSE	FALSE	TRUE	FALSE	FALSE	FALSE	FALSE	FALSE	TRUE	FALSE
Er-Kr-Sf-Or_synthetic	ekSo	4mer	5.71295	TRUE	TRUE	TRUE	TRUE	TRUE	FALSE	FALSE	FALSE	FALSE	TRUE	FALSE	FALSE	FALSE	FALSE	TRUE	FALSE	FALSE	FALSE	FALSE	TRUE
Of-Kf-Sf-Er_synthetic	OKSe	4mer	5.70606	TRUE	TRUE	TRUE	TRUE	FALSE	FALSE	FALSE	TRUE	FALSE	TRUE	FALSE	FALSE	FALSE	FALSE	TRUE	FALSE	TRUE	FALSE	FALSE	FALSE
Sr-Or-Ef-Kr_synthetic	soEk	4mer	5.70113	TRUE	TRUE	TRUE	TRUE	FALSE	FALSE	TRUE	FALSE	FALSE	FALSE	FALSE	TRUE	TRUE	FALSE	FALSE	FALSE	FALSE	TRUE	FALSE	FALSE
Er-Sf-Kr-Of_synthetic	eSkO	4mer	5.65331	TRUE	TRUE	TRUE	TRUE	TRUE	FALSE	FALSE	FALSE	FALSE	FALSE	TRUE	FALSE	FALSE	TRUE	FALSE	FALSE	FALSE	FALSE	FALSE	TRUE
Sf-Er-Kf-Or_synthetic	SeKo	4mer	5.59644	TRUE	TRUE	TRUE	TRUE	TRUE	FALSE	FALSE	FALSE	FALSE	FALSE	TRUE	FALSE	FALSE	FALSE	FALSE	TRUE	FALSE	TRUE	FALSE	FALSE
Ef-Sf-Kf-Of_synthetic	ESKO	4mer	5.59467	TRUE	TRUE	TRUE	TRUE	TRUE	FALSE	FALSE	FALSE	FALSE	FALSE	TRUE	FALSE	FALSE	TRUE	FALSE	FALSE	FALSE	FALSE	FALSE	TRUE
Kr-Sf-Ef-Of_synthetic	kSEO	4mer	5.58671	TRUE	TRUE	TRUE	TRUE	TRUE	FALSE	FALSE	FALSE	FALSE	FALSE	FALSE	TRUE	FALSE	TRUE	FALSE	FALSE	FALSE	FALSE	TRUE	FALSE
Or-Sr-Ef-Kf_synthetic	osEK	4mer	5.56736	TRUE	TRUE	TRUE	TRUE	FALSE	FALSE	TRUE	FALSE	FALSE	FALSE	FALSE	TRUE	FALSE	TRUE	FALSE	FALSE	TRUE	FALSE	FALSE	FALSE
Sf-Kr-Or-Er_synthetic	Skoe	4mer	5.56133	TRUE	TRUE	TRUE	TRUE	FALSE	FALSE	FALSE	TRUE	TRUE	FALSE	FALSE	FALSE	FALSE	FALSE	TRUE	FALSE	FALSE	TRUE	FALSE	FALSE
Er-Sr-Kr-Or_synthetic	esko	4mer	5.54896	TRUE	TRUE	TRUE	TRUE	TRUE	FALSE	FALSE	FALSE	FALSE	FALSE	TRUE	FALSE	FALSE	TRUE	FALSE	FALSE	FALSE	FALSE	FALSE	TRUE
Sr-Er-Kr-Of_synthetic	sekO	4mer	5.54651	TRUE	TRUE	TRUE	TRUE	TRUE	FALSE	FALSE	FALSE	FALSE	FALSE	TRUE	FALSE	FALSE	FALSE	FALSE	TRUE	FALSE	TRUE	FALSE	FALSE
Er-Sr-Kr-Of_synthetic	eskO	4mer	5.5387	TRUE	TRUE	TRUE	TRUE	TRUE	FALSE	FALSE	FALSE	FALSE	FALSE	TRUE	FALSE	FALSE	TRUE	FALSE	FALSE	FALSE	FALSE	FALSE	TRUE
Or-Kf-Ef-Sf_synthetic	oKES	4mer	5.53728	TRUE	TRUE	TRUE	TRUE	FALSE	TRUE	FALSE	FALSE	FALSE	FALSE	FALSE	TRUE	FALSE	FALSE	TRUE	FALSE	TRUE	FALSE	FALSE	FALSE
Sf-Kr-Ef-Of_synthetic	SkEO	4mer	5.52744	TRUE	TRUE	TRUE	TRUE	TRUE	FALSE	FALSE	FALSE	FALSE	FALSE	FALSE	TRUE	FALSE	FALSE	TRUE	FALSE	FALSE	TRUE	FALSE	FALSE
Kr-Sr-Or-Er_synthetic	ksoe	4mer	5.51334	TRUE	TRUE	TRUE	TRUE	FALSE	FALSE	FALSE	TRUE	TRUE	FALSE	FALSE	FALSE	FALSE	TRUE	FALSE	FALSE	FALSE	FALSE	TRUE	FALSE
Of-Kf-Sr-Er_synthetic	OKse	4mer	5.46367	TRUE	TRUE	TRUE	TRUE	FALSE	FALSE	FALSE	TRUE	FALSE	TRUE	FALSE	FALSE	FALSE	FALSE	TRUE	FALSE	TRUE	FALSE	FALSE	FALSE
Of-Sr-Kf-Er_synthetic	OsKe	4mer	5.44544	TRUE	TRUE	TRUE	TRUE	FALSE	FALSE	FALSE	TRUE	FALSE	FALSE	TRUE	FALSE	FALSE	TRUE	FALSE	FALSE	TRUE	FALSE	FALSE	FALSE
Ef-Kf-Or-Sr_synthetic	EKos	4mer	5.44289	TRUE	TRUE	TRUE	TRUE	FALSE	TRUE	FALSE	FALSE	TRUE	FALSE	FALSE	FALSE	FALSE	FALSE	TRUE	FALSE	FALSE	FALSE	FALSE	TRUE
Sf-Kf-Ef-Or_synthetic	SKEo	4mer	5.43306	TRUE	TRUE	TRUE	TRUE	TRUE	FALSE	FALSE	FALSE	FALSE	FALSE	FALSE	TRUE	FALSE	FALSE	TRUE	FALSE	FALSE	TRUE	FALSE	FALSE
Or-Er-Sf-Kr_synthetic	oeSk	4mer	5.42522	TRUE	TRUE	TRUE	TRUE	FALSE	FALSE	TRUE	FALSE	FALSE	TRUE	FALSE	FALSE	FALSE	FALSE	FALSE	TRUE	TRUE	FALSE	FALSE	FALSE
Ef-Sr-Or-Kr_synthetic	Esok	4mer	5.4199	TRUE	TRUE	TRUE	TRUE	FALSE	FALSE	TRUE	FALSE	TRUE	FALSE	FALSE	FALSE	FALSE	TRUE	FALSE	FALSE	FALSE	FALSE	FALSE	TRUE
Er-Sr-Kf-Of_synthetic	esKO	4mer	5.40848	TRUE	TRUE	TRUE	TRUE	TRUE	FALSE	FALSE	FALSE	FALSE	FALSE	TRUE	FALSE	FALSE	TRUE	FALSE	FALSE	FALSE	FALSE	FALSE	TRUE
Sf-Er-Of-Kf_synthetic	SeOK	4mer	5.37365	TRUE	TRUE	TRUE	TRUE	FALSE	FALSE	TRUE	FALSE	TRUE	FALSE	FALSE	FALSE	FALSE	FALSE	FALSE	TRUE	FALSE	TRUE	FALSE	FALSE
Or-Ef-Sf-Kr_synthetic	oESk	4mer	5.33926	TRUE	TRUE	TRUE	TRUE	FALSE	FALSE	TRUE	FALSE	FALSE	TRUE	FALSE	FALSE	FALSE	FALSE	FALSE	TRUE	TRUE	FALSE	FALSE	FALSE
Ef-Of-Kr-Sr_synthetic	EOks	4mer	5.32938	TRUE	TRUE	TRUE	TRUE	FALSE	TRUE	FALSE	FALSE	FALSE	FALSE	TRUE	FALSE	TRUE	FALSE	FALSE	FALSE	FALSE	FALSE	FALSE	TRUE
Kr-Sf-Er-Or_synthetic	kSeo	4mer	5.32913	TRUE	TRUE	TRUE	TRUE	TRUE	FALSE	FALSE	FALSE	FALSE	FALSE	FALSE	TRUE	FALSE	TRUE	FALSE	FALSE	FALSE	FALSE	TRUE	FALSE
Kr-Of-Sr-Er_synthetic	kOse	4mer	5.29666	TRUE	TRUE	TRUE	TRUE	FALSE	FALSE	FALSE	TRUE	FALSE	TRUE	FALSE	FALSE	TRUE	FALSE	FALSE	FALSE	FALSE	FALSE	TRUE	FALSE
Or-Kf-Er-Sr_synthetic	oKes	4mer	5.2842	TRUE	TRUE	TRUE	TRUE	FALSE	TRUE	FALSE	FALSE	FALSE	FALSE	FALSE	TRUE	FALSE	FALSE	TRUE	FALSE	TRUE	FALSE	FALSE	FALSE
Or-Sf-Er-Kf_synthetic	oSeK	4mer	5.28081	TRUE	TRUE	TRUE	TRUE	FALSE	FALSE	TRUE	FALSE	FALSE	FALSE	FALSE	TRUE	FALSE	TRUE	FALSE	FALSE	TRUE	FALSE	FALSE	FALSE
Kf-Sr-Ef-Of_synthetic	KsEO	4mer	5.27987	TRUE	TRUE	TRUE	TRUE	TRUE	FALSE	FALSE	FALSE	FALSE	FALSE	FALSE	TRUE	FALSE	TRUE	FALSE	FALSE	FALSE	FALSE	TRUE	FALSE
Or-Kr-Ef-Sr_synthetic	okEs	4mer	5.25106	TRUE	TRUE	TRUE	TRUE	FALSE	TRUE	FALSE	FALSE	FALSE	FALSE	FALSE	TRUE	FALSE	FALSE	TRUE	FALSE	TRUE	FALSE	FALSE	FALSE
Of-Kr-Sr-Er_synthetic	Okse	4mer	5.25053	TRUE	TRUE	TRUE	TRUE	FALSE	FALSE	FALSE	TRUE	FALSE	TRUE	FALSE	FALSE	FALSE	FALSE	TRUE	FALSE	TRUE	FALSE	FALSE	FALSE
Kr-Sr-Er-Or_synthetic	kseo	4mer	5.24146	TRUE	TRUE	TRUE	TRUE	TRUE	FALSE	FALSE	FALSE	FALSE	FALSE	FALSE	TRUE	FALSE	TRUE	FALSE	FALSE	FALSE	FALSE	TRUE	FALSE
Or-Er-Kr-Sf_synthetic	oekS	4mer	5.23351	TRUE	TRUE	TRUE	TRUE	FALSE	TRUE	FALSE	FALSE	FALSE	FALSE	TRUE	FALSE	FALSE	FALSE	FALSE	TRUE	TRUE	FALSE	FALSE	FALSE
Ef-Or-Kr-Sr_synthetic	Eoks	4mer	5.23059	TRUE	TRUE	TRUE	TRUE	FALSE	TRUE	FALSE	FALSE	FALSE	FALSE	TRUE	FALSE	TRUE	FALSE	FALSE	FALSE	FALSE	FALSE	FALSE	TRUE
Kf-Sr-Er-Of_synthetic	KseO	4mer	5.22696	TRUE	TRUE	TRUE	TRUE	TRUE	FALSE	FALSE	FALSE	FALSE	FALSE	FALSE	TRUE	FALSE	TRUE	FALSE	FALSE	FALSE	FALSE	TRUE	FALSE
Er-Sf-Or-Kr_synthetic	eSok	4mer	5.19176	TRUE	TRUE	TRUE	TRUE	FALSE	FALSE	TRUE	FALSE	TRUE	FALSE	FALSE	FALSE	FALSE	TRUE	FALSE	FALSE	FALSE	FALSE	FALSE	TRUE
Sf-Of-Er-Kf_synthetic	SOeK	4mer	5.17654	TRUE	TRUE	TRUE	TRUE	FALSE	FALSE	TRUE	FALSE	FALSE	FALSE	FALSE	TRUE	TRUE	FALSE	FALSE	FALSE	FALSE	TRUE	FALSE	FALSE
Kr-Sr-Ef-Or_synthetic	ksEo	4mer	5.17314	TRUE	TRUE	TRUE	TRUE	TRUE	FALSE	FALSE	FALSE	FALSE	FALSE	FALSE	TRUE	FALSE	TRUE	FALSE	FALSE	FALSE	FALSE	TRUE	FALSE
Kf-Sr-Or-Er_synthetic	Ksoe	4mer	5.1673	TRUE	TRUE	TRUE	TRUE	FALSE	FALSE	FALSE	TRUE	TRUE	FALSE	FALSE	FALSE	FALSE	TRUE	FALSE	FALSE	FALSE	FALSE	TRUE	FALSE
Er-Of-Kr-Sr_synthetic	eOks	4mer	5.16469	TRUE	TRUE	TRUE	TRUE	FALSE	TRUE	FALSE	FALSE	FALSE	FALSE	TRUE	FALSE	TRUE	FALSE	FALSE	FALSE	FALSE	FALSE	FALSE	TRUE
Or-Ef-Kf-Sr_synthetic	oEKs	4mer	5.13506	TRUE	TRUE	TRUE	TRUE	FALSE	TRUE	FALSE	FALSE	FALSE	FALSE	TRUE	FALSE	FALSE	FALSE	FALSE	TRUE	TRUE	FALSE	FALSE	FALSE
Er-Or-Kf-Sr_synthetic	eoKs	4mer	5.1157	TRUE	TRUE	TRUE	TRUE	FALSE	TRUE	FALSE	FALSE	FALSE	FALSE	TRUE	FALSE	TRUE	FALSE	FALSE	FALSE	FALSE	FALSE	FALSE	TRUE
Er-Sf-Kf-Of_synthetic	eSKO	4mer	5.10019	TRUE	TRUE	TRUE	TRUE	TRUE	FALSE	FALSE	FALSE	FALSE	FALSE	TRUE	FALSE	FALSE	TRUE	FALSE	FALSE	FALSE	FALSE	FALSE	TRUE
Er-Or-Sf-Kf_synthetic	eoSK	4mer	5.09135	TRUE	TRUE	TRUE	TRUE	FALSE	FALSE	TRUE	FALSE	FALSE	TRUE	FALSE	FALSE	TRUE	FALSE	FALSE	FALSE	FALSE	FALSE	FALSE	TRUE
Er-Kr-Or-Sr_synthetic	ekos	4mer	5.07928	TRUE	TRUE	TRUE	TRUE	FALSE	TRUE	FALSE	FALSE	TRUE	FALSE	FALSE	FALSE	FALSE	FALSE	TRUE	FALSE	FALSE	FALSE	FALSE	TRUE
Sr-Of-Kr_synthetic	sOk	3mer	5.07593	TRUE	TRUE	TRUE	FALSE	FALSE	FALSE	TRUE	FALSE	TRUE	FALSE	FALSE	FALSE	FALSE	TRUE	FALSE	FALSE	FALSE	FALSE	FALSE	FALSE
Kf-Of-Sr-Er_synthetic	KOse	4mer	5.07513	TRUE	TRUE	TRUE	TRUE	FALSE	FALSE	FALSE	TRUE	FALSE	TRUE	FALSE	FALSE	TRUE	FALSE	FALSE	FALSE	FALSE	FALSE	TRUE	FALSE
Ef-Or-Kf-Sr_synthetic	EoKs	4mer	5.07289	TRUE	TRUE	TRUE	TRUE	FALSE	TRUE	FALSE	FALSE	FALSE	FALSE	TRUE	FALSE	TRUE	FALSE	FALSE	FALSE	FALSE	FALSE	FALSE	TRUE
Kr-Sr-Ef-Of_synthetic	ksEO	4mer	5.05872	TRUE	TRUE	TRUE	TRUE	TRUE	FALSE	FALSE	FALSE	FALSE	FALSE	FALSE	TRUE	FALSE	TRUE	FALSE	FALSE	FALSE	FALSE	TRUE	FALSE
Er-Or-Kf-Sf_synthetic	eoKS	4mer	5.05353	TRUE	TRUE	TRUE	TRUE	FALSE	TRUE	FALSE	FALSE	FALSE	FALSE	TRUE	FALSE	TRUE	FALSE	FALSE	FALSE	FALSE	FALSE	FALSE	TRUE
Er-Or-Sr-Kf_synthetic	eosK	4mer	5.05059	TRUE	TRUE	TRUE	TRUE	FALSE	FALSE	TRUE	FALSE	FALSE	TRUE	FALSE	FALSE	TRUE	FALSE	FALSE	FALSE	FALSE	FALSE	FALSE	TRUE
Er-Sf-Or-Kf_synthetic	eSoK	4mer	5.0387	TRUE	TRUE	TRUE	TRUE	FALSE	FALSE	TRUE	FALSE	TRUE	FALSE	FALSE	FALSE	FALSE	TRUE	FALSE	FALSE	FALSE	FALSE	FALSE	TRUE
Sf-Kf-Er-Or_synthetic	SKeo	4mer	5.02948	TRUE	TRUE	TRUE	TRUE	TRUE	FALSE	FALSE	FALSE	FALSE	FALSE	FALSE	TRUE	FALSE	FALSE	TRUE	FALSE	FALSE	TRUE	FALSE	FALSE
Sr-Ef-Kr-Of_synthetic	sEkO	4mer	5.00628	TRUE	TRUE	TRUE	TRUE	TRUE	FALSE	FALSE	FALSE	FALSE	FALSE	TRUE	FALSE	FALSE	FALSE	FALSE	TRUE	FALSE	TRUE	FALSE	FALSE
Kr-Or-Er-Sr_synthetic	koes	4mer	5.00301	TRUE	TRUE	TRUE	TRUE	FALSE	TRUE	FALSE	FALSE	FALSE	FALSE	FALSE	TRUE	TRUE	FALSE	FALSE	FALSE	FALSE	FALSE	TRUE	FALSE
Sr-Ef-Kf-Or_synthetic	sEKo	4mer	4.99997	TRUE	TRUE	TRUE	TRUE	TRUE	FALSE	FALSE	FALSE	FALSE	FALSE	TRUE	FALSE	FALSE	FALSE	FALSE	TRUE	FALSE	TRUE	FALSE	FALSE
Or-Er-Kr-Sr_synthetic	oeks	4mer	4.98207	TRUE	TRUE	TRUE	TRUE	FALSE	TRUE	FALSE	FALSE	FALSE	FALSE	TRUE	FALSE	FALSE	FALSE	FALSE	TRUE	TRUE	FALSE	FALSE	FALSE
Kf-Of-Sr-Ef_synthetic	KOsE	4mer	4.97828	TRUE	TRUE	TRUE	TRUE	FALSE	FALSE	FALSE	TRUE	FALSE	TRUE	FALSE	FALSE	TRUE	FALSE	FALSE	FALSE	FALSE	FALSE	TRUE	FALSE
Sr-Kf-Er-Or_synthetic	sKeo	4mer	4.97395	TRUE	TRUE	TRUE	TRUE	TRUE	FALSE	FALSE	FALSE	FALSE	FALSE	FALSE	TRUE	FALSE	FALSE	TRUE	FALSE	FALSE	TRUE	FALSE	FALSE
Ef-Or-Sf-Kr_synthetic	EoSk	4mer	4.9548	TRUE	TRUE	TRUE	TRUE	FALSE	FALSE	TRUE	FALSE	FALSE	TRUE	FALSE	FALSE	TRUE	FALSE	FALSE	FALSE	FALSE	FALSE	FALSE	TRUE
Er-Of-Kf-Sr_synthetic	eOKs	4mer	4.952	TRUE	TRUE	TRUE	TRUE	FALSE	TRUE	FALSE	FALSE	FALSE	FALSE	TRUE	FALSE	TRUE	FALSE	FALSE	FALSE	FALSE	FALSE	FALSE	TRUE
Sf-Or-Er-Kr_synthetic	Soek	4mer	4.94688	TRUE	TRUE	TRUE	TRUE	FALSE	FALSE	TRUE	FALSE	FALSE	FALSE	FALSE	TRUE	TRUE	FALSE	FALSE	FALSE	FALSE	TRUE	FALSE	FALSE
Kr-Sr-Er-Of_synthetic	kseO	4mer	4.94512	TRUE	TRUE	TRUE	TRUE	TRUE	FALSE	FALSE	FALSE	FALSE	FALSE	FALSE	TRUE	FALSE	TRUE	FALSE	FALSE	FALSE	FALSE	TRUE	FALSE
Of-Kr-Sf-Er_synthetic	OkSe	4mer	4.93865	TRUE	TRUE	TRUE	TRUE	FALSE	FALSE	FALSE	TRUE	FALSE	TRUE	FALSE	FALSE	FALSE	FALSE	TRUE	FALSE	TRUE	FALSE	FALSE	FALSE
Or-Sf-Ef-Kf_synthetic	oSEK	4mer	4.90827	TRUE	TRUE	TRUE	TRUE	FALSE	FALSE	TRUE	FALSE	FALSE	FALSE	FALSE	TRUE	FALSE	TRUE	FALSE	FALSE	TRUE	FALSE	FALSE	FALSE
Or-Ef-Sr-Kf_synthetic	oEsK	4mer	4.89497	TRUE	TRUE	TRUE	TRUE	FALSE	FALSE	TRUE	FALSE	FALSE	TRUE	FALSE	FALSE	FALSE	FALSE	FALSE	TRUE	TRUE	FALSE	FALSE	FALSE
Ef-Or-Sr-Kr_synthetic	Eosk	4mer	4.8636	TRUE	TRUE	TRUE	TRUE	FALSE	FALSE	TRUE	FALSE	FALSE	TRUE	FALSE	FALSE	TRUE	FALSE	FALSE	FALSE	FALSE	FALSE	FALSE	TRUE
Of-Sr-Er-Kr_synthetic	Osek	4mer	4.84953	TRUE	TRUE	TRUE	TRUE	FALSE	FALSE	TRUE	FALSE	FALSE	FALSE	FALSE	TRUE	FALSE	TRUE	FALSE	FALSE	TRUE	FALSE	FALSE	FALSE
Sf-Er-Kr-Of_synthetic	SekO	4mer	4.84837	TRUE	TRUE	TRUE	TRUE	TRUE	FALSE	FALSE	FALSE	FALSE	FALSE	TRUE	FALSE	FALSE	FALSE	FALSE	TRUE	FALSE	TRUE	FALSE	FALSE
Er-Or-Kr-Sf_synthetic	eokS	4mer	4.82516	TRUE	TRUE	TRUE	TRUE	FALSE	TRUE	FALSE	FALSE	FALSE	FALSE	TRUE	FALSE	TRUE	FALSE	FALSE	FALSE	FALSE	FALSE	FALSE	TRUE
Sf-Kf-Er-Of_synthetic	SKeO	4mer	4.81827	TRUE	TRUE	TRUE	TRUE	TRUE	FALSE	FALSE	FALSE	FALSE	FALSE	FALSE	TRUE	FALSE	FALSE	TRUE	FALSE	FALSE	TRUE	FALSE	FALSE
Sr-Kr-Ef-Of_synthetic	skEO	4mer	4.80946	TRUE	TRUE	TRUE	TRUE	TRUE	FALSE	FALSE	FALSE	FALSE	FALSE	FALSE	TRUE	FALSE	FALSE	TRUE	FALSE	FALSE	TRUE	FALSE	FALSE
Ef-Kf-Sr-Of_synthetic	EKsO	4mer	4.80817	TRUE	TRUE	TRUE	TRUE	TRUE	FALSE	FALSE	FALSE	FALSE	TRUE	FALSE	FALSE	FALSE	FALSE	TRUE	FALSE	FALSE	FALSE	FALSE	TRUE
Sf-Kr-Er-Or_synthetic	Skeo	4mer	4.79991	TRUE	TRUE	TRUE	TRUE	TRUE	FALSE	FALSE	FALSE	FALSE	FALSE	FALSE	TRUE	FALSE	FALSE	TRUE	FALSE	FALSE	TRUE	FALSE	FALSE
Er-Kf-Or-Sr_synthetic	eKos	4mer	4.79973	TRUE	TRUE	TRUE	TRUE	FALSE	TRUE	FALSE	FALSE	TRUE	FALSE	FALSE	FALSE	FALSE	FALSE	TRUE	FALSE	FALSE	FALSE	FALSE	TRUE
Er-Or-Sr-Kr_synthetic	eosk	4mer	4.79456	TRUE	TRUE	TRUE	TRUE	FALSE	FALSE	TRUE	FALSE	FALSE	TRUE	FALSE	FALSE	TRUE	FALSE	FALSE	FALSE	FALSE	FALSE	FALSE	TRUE
Or-Kf-Er-Sf_synthetic	oKeS	4mer	4.79147	TRUE	TRUE	TRUE	TRUE	FALSE	TRUE	FALSE	FALSE	FALSE	FALSE	FALSE	TRUE	FALSE	FALSE	TRUE	FALSE	TRUE	FALSE	FALSE	FALSE
Sf-Kf-Ef-Of_synthetic	SKEO	4mer	4.77517	TRUE	TRUE	TRUE	TRUE	TRUE	FALSE	FALSE	FALSE	FALSE	FALSE	FALSE	TRUE	FALSE	FALSE	TRUE	FALSE	FALSE	TRUE	FALSE	FALSE
Kf-Or-Ef-Sf_synthetic	KoES	4mer	4.76767	TRUE	TRUE	TRUE	TRUE	FALSE	TRUE	FALSE	FALSE	FALSE	FALSE	FALSE	TRUE	TRUE	FALSE	FALSE	FALSE	FALSE	FALSE	TRUE	FALSE
Ef-Kf-Sf-Or_synthetic	EKSo	4mer	4.76545	TRUE	TRUE	TRUE	TRUE	TRUE	FALSE	FALSE	FALSE	FALSE	TRUE	FALSE	FALSE	FALSE	FALSE	TRUE	FALSE	FALSE	FALSE	FALSE	TRUE
Of-Kr-Sf-Ef_synthetic	OkSE	4mer	4.73386	TRUE	TRUE	TRUE	TRUE	FALSE	FALSE	FALSE	TRUE	FALSE	TRUE	FALSE	FALSE	FALSE	FALSE	TRUE	FALSE	TRUE	FALSE	FALSE	FALSE
Or-Sf-Ef-Kr_synthetic	oSEk	4mer	4.73292	TRUE	TRUE	TRUE	TRUE	FALSE	FALSE	TRUE	FALSE	FALSE	FALSE	FALSE	TRUE	FALSE	TRUE	FALSE	FALSE	TRUE	FALSE	FALSE	FALSE
Ef-Or-Sr-Kf_synthetic	EosK	4mer	4.73256	TRUE	TRUE	TRUE	TRUE	FALSE	FALSE	TRUE	FALSE	FALSE	TRUE	FALSE	FALSE	TRUE	FALSE	FALSE	FALSE	FALSE	FALSE	FALSE	TRUE
Kf-Sf-Er-Or_synthetic	KSeo	4mer	4.72812	TRUE	TRUE	TRUE	TRUE	TRUE	FALSE	FALSE	FALSE	FALSE	FALSE	FALSE	TRUE	FALSE	TRUE	FALSE	FALSE	FALSE	FALSE	TRUE	FALSE
Sr-Or-Ef-Kf_synthetic	soEK	4mer	4.69815	TRUE	TRUE	TRUE	TRUE	FALSE	FALSE	TRUE	FALSE	FALSE	FALSE	FALSE	TRUE	TRUE	FALSE	FALSE	FALSE	FALSE	TRUE	FALSE	FALSE
Kf-Of-Sf-Er_synthetic	KOSe	4mer	4.69593	TRUE	TRUE	TRUE	TRUE	FALSE	FALSE	FALSE	TRUE	FALSE	TRUE	FALSE	FALSE	TRUE	FALSE	FALSE	FALSE	FALSE	FALSE	TRUE	FALSE
Kf-Sr-Er-Or_synthetic	Kseo	4mer	4.69249	TRUE	TRUE	TRUE	TRUE	TRUE	FALSE	FALSE	FALSE	FALSE	FALSE	FALSE	TRUE	FALSE	TRUE	FALSE	FALSE	FALSE	FALSE	TRUE	FALSE
Ef-Kr-Or-Sr_synthetic	Ekos	4mer	4.67663	TRUE	TRUE	TRUE	TRUE	FALSE	TRUE	FALSE	FALSE	TRUE	FALSE	FALSE	FALSE	FALSE	FALSE	TRUE	FALSE	FALSE	FALSE	FALSE	TRUE
Sr-Er-Or-Kf_synthetic	seoK	4mer	4.66842	TRUE	TRUE	TRUE	TRUE	FALSE	FALSE	TRUE	FALSE	TRUE	FALSE	FALSE	FALSE	FALSE	FALSE	FALSE	TRUE	FALSE	TRUE	FALSE	FALSE
Sr-Kf-Er-Of_synthetic	sKeO	4mer	4.66612	TRUE	TRUE	TRUE	TRUE	TRUE	FALSE	FALSE	FALSE	FALSE	FALSE	FALSE	TRUE	FALSE	FALSE	TRUE	FALSE	FALSE	TRUE	FALSE	FALSE
Sr-Er-Kf-Of_synthetic	seKO	4mer	4.64389	TRUE	TRUE	TRUE	TRUE	TRUE	FALSE	FALSE	FALSE	FALSE	FALSE	TRUE	FALSE	FALSE	FALSE	FALSE	TRUE	FALSE	TRUE	FALSE	FALSE
Er-Or-Kr-Sr_synthetic	eoks	4mer	4.63939	TRUE	TRUE	TRUE	TRUE	FALSE	TRUE	FALSE	FALSE	FALSE	FALSE	TRUE	FALSE	TRUE	FALSE	FALSE	FALSE	FALSE	FALSE	FALSE	TRUE
Er-Kf-Or-Sf_synthetic	eKoS	4mer	4.6322	TRUE	TRUE	TRUE	TRUE	FALSE	TRUE	FALSE	FALSE	TRUE	FALSE	FALSE	FALSE	FALSE	FALSE	TRUE	FALSE	FALSE	FALSE	FALSE	TRUE
Of-Kf-Sf-Ef_synthetic	OKSE	4mer	4.62546	TRUE	TRUE	TRUE	TRUE	FALSE	FALSE	FALSE	TRUE	FALSE	TRUE	FALSE	FALSE	FALSE	FALSE	TRUE	FALSE	TRUE	FALSE	FALSE	FALSE
Sr-Ef-Or-Kf_synthetic	sEoK	4mer	4.62279	TRUE	TRUE	TRUE	TRUE	FALSE	FALSE	TRUE	FALSE	TRUE	FALSE	FALSE	FALSE	FALSE	FALSE	FALSE	TRUE	FALSE	TRUE	FALSE	FALSE
Ef-Sf-Or-Kf_synthetic	ESoK	4mer	4.62114	TRUE	TRUE	TRUE	TRUE	FALSE	FALSE	TRUE	FALSE	TRUE	FALSE	FALSE	FALSE	FALSE	TRUE	FALSE	FALSE	FALSE	FALSE	FALSE	TRUE
Ef-Sr-Or-Kf_synthetic	EsoK	4mer	4.61953	TRUE	TRUE	TRUE	TRUE	FALSE	FALSE	TRUE	FALSE	TRUE	FALSE	FALSE	FALSE	FALSE	TRUE	FALSE	FALSE	FALSE	FALSE	FALSE	TRUE
Sr-Kr-Er-Of_synthetic	skeO	4mer	4.61438	TRUE	TRUE	TRUE	TRUE	TRUE	FALSE	FALSE	FALSE	FALSE	FALSE	FALSE	TRUE	FALSE	FALSE	TRUE	FALSE	FALSE	TRUE	FALSE	FALSE
Sr-Kf-Ef_synthetic	sKE	3mer	4.61073	FALSE	TRUE	TRUE	TRUE	FALSE	FALSE	FALSE	TRUE	FALSE	FALSE	TRUE	FALSE	FALSE	TRUE	FALSE	FALSE	FALSE	FALSE	FALSE	FALSE
Ef-Kf-Sr-Or_synthetic	EKso	4mer	4.59763	TRUE	TRUE	TRUE	TRUE	TRUE	FALSE	FALSE	FALSE	FALSE	TRUE	FALSE	FALSE	FALSE	FALSE	TRUE	FALSE	FALSE	FALSE	FALSE	TRUE
Er-Of-Kr-Sf_synthetic	eOkS	4mer	4.59381	TRUE	TRUE	TRUE	TRUE	FALSE	TRUE	FALSE	FALSE	FALSE	FALSE	TRUE	FALSE	TRUE	FALSE	FALSE	FALSE	FALSE	FALSE	FALSE	TRUE
Ef-Or-Kr-Sf_synthetic	EokS	4mer	4.59349	TRUE	TRUE	TRUE	TRUE	FALSE	TRUE	FALSE	FALSE	FALSE	FALSE	TRUE	FALSE	TRUE	FALSE	FALSE	FALSE	FALSE	FALSE	FALSE	TRUE
Er-Kf-Sf-Of_synthetic	eKSO	4mer	4.5924	TRUE	TRUE	TRUE	TRUE	TRUE	FALSE	FALSE	FALSE	FALSE	TRUE	FALSE	FALSE	FALSE	FALSE	TRUE	FALSE	FALSE	FALSE	FALSE	TRUE
Sf-Ef-Kr-Or_synthetic	SEko	4mer	4.5906	TRUE	TRUE	TRUE	TRUE	TRUE	FALSE	FALSE	FALSE	FALSE	FALSE	TRUE	FALSE	FALSE	FALSE	FALSE	TRUE	FALSE	TRUE	FALSE	FALSE
Or-Kr-Er-Sf_synthetic	okeS	4mer	4.58932	TRUE	TRUE	TRUE	TRUE	FALSE	TRUE	FALSE	FALSE	FALSE	FALSE	FALSE	TRUE	FALSE	FALSE	TRUE	FALSE	TRUE	FALSE	FALSE	FALSE
Ef-Of-Kf-Sr_synthetic	EOKs	4mer	4.58578	TRUE	TRUE	TRUE	TRUE	FALSE	TRUE	FALSE	FALSE	FALSE	FALSE	TRUE	FALSE	TRUE	FALSE	FALSE	FALSE	FALSE	FALSE	FALSE	TRUE
Er-Kr-Sf-Of_synthetic	ekSO	4mer	4.58429	TRUE	TRUE	TRUE	TRUE	TRUE	FALSE	FALSE	FALSE	FALSE	TRUE	FALSE	FALSE	FALSE	FALSE	TRUE	FALSE	FALSE	FALSE	FALSE	TRUE
Or-Er-Kf-Sr_synthetic	oeKs	4mer	4.58081	TRUE	TRUE	TRUE	TRUE	FALSE	TRUE	FALSE	FALSE	FALSE	FALSE	TRUE	FALSE	FALSE	FALSE	FALSE	TRUE	TRUE	FALSE	FALSE	FALSE
Kf-Of-Sf-Ef_synthetic	KOSE	4mer	4.58079	TRUE	TRUE	TRUE	TRUE	FALSE	FALSE	FALSE	TRUE	FALSE	TRUE	FALSE	FALSE	TRUE	FALSE	FALSE	FALSE	FALSE	FALSE	TRUE	FALSE
Of-Sf-Kr-Ef_synthetic	OSkE	4mer	4.57825	TRUE	TRUE	TRUE	TRUE	FALSE	FALSE	FALSE	TRUE	FALSE	FALSE	TRUE	FALSE	FALSE	TRUE	FALSE	FALSE	TRUE	FALSE	FALSE	FALSE
Of-Ef-Sf-Kr_synthetic	OESk	4mer	4.57231	TRUE	TRUE	TRUE	TRUE	FALSE	FALSE	TRUE	FALSE	FALSE	TRUE	FALSE	FALSE	FALSE	FALSE	FALSE	TRUE	TRUE	FALSE	FALSE	FALSE
Sr-Of-Kf_synthetic	sOK	3mer	4.56753	TRUE	TRUE	TRUE	FALSE	FALSE	FALSE	TRUE	FALSE	TRUE	FALSE	FALSE	FALSE	FALSE	TRUE	FALSE	FALSE	FALSE	FALSE	FALSE	FALSE
Of-Sf-Kf-Er_synthetic	OSKe	4mer	4.56465	TRUE	TRUE	TRUE	TRUE	FALSE	FALSE	FALSE	TRUE	FALSE	FALSE	TRUE	FALSE	FALSE	TRUE	FALSE	FALSE	TRUE	FALSE	FALSE	FALSE
Er-Of-Sr-Kf_synthetic	eOsK	4mer	4.55047	TRUE	TRUE	TRUE	TRUE	FALSE	FALSE	TRUE	FALSE	FALSE	TRUE	FALSE	FALSE	TRUE	FALSE	FALSE	FALSE	FALSE	FALSE	FALSE	TRUE
Ef-Kf-Or-Sf_synthetic	EKoS	4mer	4.54774	TRUE	TRUE	TRUE	TRUE	FALSE	TRUE	FALSE	FALSE	TRUE	FALSE	FALSE	FALSE	FALSE	FALSE	TRUE	FALSE	FALSE	FALSE	FALSE	TRUE
Sr-Ef-Kf-Of_synthetic	sEKO	4mer	4.53715	TRUE	TRUE	TRUE	TRUE	TRUE	FALSE	FALSE	FALSE	FALSE	FALSE	TRUE	FALSE	FALSE	FALSE	FALSE	TRUE	FALSE	TRUE	FALSE	FALSE
Sf-Ef-Kf-Of_synthetic	SEKO	4mer	4.53157	TRUE	TRUE	TRUE	TRUE	TRUE	FALSE	FALSE	FALSE	FALSE	FALSE	TRUE	FALSE	FALSE	FALSE	FALSE	TRUE	FALSE	TRUE	FALSE	FALSE
Kr-Of-Sr-Ef_synthetic	kOsE	4mer	4.49333	TRUE	TRUE	TRUE	TRUE	FALSE	FALSE	FALSE	TRUE	FALSE	TRUE	FALSE	FALSE	TRUE	FALSE	FALSE	FALSE	FALSE	FALSE	TRUE	FALSE
Kf-Sf-Er-Of_synthetic	KSeO	4mer	4.48472	TRUE	TRUE	TRUE	TRUE	TRUE	FALSE	FALSE	FALSE	FALSE	FALSE	FALSE	TRUE	FALSE	TRUE	FALSE	FALSE	FALSE	FALSE	TRUE	FALSE
Er-Of-Sf-Kr_synthetic	eOSk	4mer	4.47155	TRUE	TRUE	TRUE	TRUE	FALSE	FALSE	TRUE	FALSE	FALSE	TRUE	FALSE	FALSE	TRUE	FALSE	FALSE	FALSE	FALSE	FALSE	FALSE	TRUE
Ef-Kr-Sr-Or_synthetic	Ekso	4mer	4.46495	TRUE	TRUE	TRUE	TRUE	TRUE	FALSE	FALSE	FALSE	FALSE	TRUE	FALSE	FALSE	FALSE	FALSE	TRUE	FALSE	FALSE	FALSE	FALSE	TRUE
Ef-Kr-Sr-Of_synthetic	EksO	4mer	4.43007	TRUE	TRUE	TRUE	TRUE	TRUE	FALSE	FALSE	FALSE	FALSE	TRUE	FALSE	FALSE	FALSE	FALSE	TRUE	FALSE	FALSE	FALSE	FALSE	TRUE
Er-Kf-Sr-Or_synthetic	eKso	4mer	4.42485	TRUE	TRUE	TRUE	TRUE	TRUE	FALSE	FALSE	FALSE	FALSE	TRUE	FALSE	FALSE	FALSE	FALSE	TRUE	FALSE	FALSE	FALSE	FALSE	TRUE
Sf-Or-Ef-Kf_synthetic	SoEK	4mer	4.4143	TRUE	TRUE	TRUE	TRUE	FALSE	FALSE	TRUE	FALSE	FALSE	FALSE	FALSE	TRUE	TRUE	FALSE	FALSE	FALSE	FALSE	TRUE	FALSE	FALSE
Or-Ef-Sf-Kf_synthetic	oESK	4mer	4.40292	TRUE	TRUE	TRUE	TRUE	FALSE	FALSE	TRUE	FALSE	FALSE	TRUE	FALSE	FALSE	FALSE	FALSE	FALSE	TRUE	TRUE	FALSE	FALSE	FALSE
Ef-Of-Sr-Kr_synthetic	EOsk	4mer	4.3614	TRUE	TRUE	TRUE	TRUE	FALSE	FALSE	TRUE	FALSE	FALSE	TRUE	FALSE	FALSE	TRUE	FALSE	FALSE	FALSE	FALSE	FALSE	FALSE	TRUE
Kr-Or-Ef-Sf_synthetic	koES	4mer	4.3359	TRUE	TRUE	TRUE	TRUE	FALSE	TRUE	FALSE	FALSE	FALSE	FALSE	FALSE	TRUE	TRUE	FALSE	FALSE	FALSE	FALSE	FALSE	TRUE	FALSE
Er-Kr-Sr-Or_synthetic	ekso	4mer	4.3293	TRUE	TRUE	TRUE	TRUE	TRUE	FALSE	FALSE	FALSE	FALSE	TRUE	FALSE	FALSE	FALSE	FALSE	TRUE	FALSE	FALSE	FALSE	FALSE	TRUE
Kf-Ef-Sf-Or_synthetic	KESo	4mer	4.31849	TRUE	TRUE	TRUE	TRUE	TRUE	FALSE	FALSE	FALSE	FALSE	TRUE	FALSE	FALSE	FALSE	FALSE	FALSE	TRUE	FALSE	FALSE	TRUE	FALSE
Er-Of-Sr-Kr_synthetic	eOsk	4mer	4.30702	TRUE	TRUE	TRUE	TRUE	FALSE	FALSE	TRUE	FALSE	FALSE	TRUE	FALSE	FALSE	TRUE	FALSE	FALSE	FALSE	FALSE	FALSE	FALSE	TRUE
Er-Or-Sf-Kr_synthetic	eoSk	4mer	4.30622	TRUE	TRUE	TRUE	TRUE	FALSE	FALSE	TRUE	FALSE	FALSE	TRUE	FALSE	FALSE	TRUE	FALSE	FALSE	FALSE	FALSE	FALSE	FALSE	TRUE
Or-Kr-Er-Sr_synthetic	okes	4mer	4.30583	TRUE	TRUE	TRUE	TRUE	FALSE	TRUE	FALSE	FALSE	FALSE	FALSE	FALSE	TRUE	FALSE	FALSE	TRUE	FALSE	TRUE	FALSE	FALSE	FALSE
Sf-Kf-Ef_synthetic	SKE	3mer	4.29706	FALSE	TRUE	TRUE	TRUE	FALSE	FALSE	FALSE	TRUE	FALSE	FALSE	TRUE	FALSE	FALSE	TRUE	FALSE	FALSE	FALSE	FALSE	FALSE	FALSE
Of-Kr-Er-Sf_synthetic	OkeS	4mer	4.29243	TRUE	TRUE	TRUE	TRUE	FALSE	TRUE	FALSE	FALSE	FALSE	FALSE	FALSE	TRUE	FALSE	FALSE	TRUE	FALSE	TRUE	FALSE	FALSE	FALSE
Er-Kr-Or-Sf_synthetic	ekoS	4mer	4.28811	TRUE	TRUE	TRUE	TRUE	FALSE	TRUE	FALSE	FALSE	TRUE	FALSE	FALSE	FALSE	FALSE	FALSE	TRUE	FALSE	FALSE	FALSE	FALSE	TRUE
Or-Kf-Er_synthetic	oKe	3mer	4.2684	TRUE	FALSE	TRUE	TRUE	FALSE	FALSE	FALSE	TRUE	FALSE	FALSE	TRUE	FALSE	TRUE	FALSE	FALSE	FALSE	FALSE	FALSE	FALSE	FALSE
Sr-Or-Er-Kr_synthetic	soek	4mer	4.26362	TRUE	TRUE	TRUE	TRUE	FALSE	FALSE	TRUE	FALSE	FALSE	FALSE	FALSE	TRUE	TRUE	FALSE	FALSE	FALSE	FALSE	TRUE	FALSE	FALSE
Kf-Or-Er-Sr_synthetic	Koes	4mer	4.24125	TRUE	TRUE	TRUE	TRUE	FALSE	TRUE	FALSE	FALSE	FALSE	FALSE	FALSE	TRUE	TRUE	FALSE	FALSE	FALSE	FALSE	FALSE	TRUE	FALSE
Er-Sr-Or-Kf_synthetic	esoK	4mer	4.22585	TRUE	TRUE	TRUE	TRUE	FALSE	FALSE	TRUE	FALSE	TRUE	FALSE	FALSE	FALSE	FALSE	TRUE	FALSE	FALSE	FALSE	FALSE	FALSE	TRUE
Kr-Of-Sf-Er_synthetic	kOSe	4mer	4.21924	TRUE	TRUE	TRUE	TRUE	FALSE	FALSE	FALSE	TRUE	FALSE	TRUE	FALSE	FALSE	TRUE	FALSE	FALSE	FALSE	FALSE	FALSE	TRUE	FALSE
Of-Sf-Kr-Er_synthetic	OSke	4mer	4.21175	TRUE	TRUE	TRUE	TRUE	FALSE	FALSE	FALSE	TRUE	FALSE	FALSE	TRUE	FALSE	FALSE	TRUE	FALSE	FALSE	TRUE	FALSE	FALSE	FALSE
Kf-Sf-Ef-Or_synthetic	KSEo	4mer	4.20888	TRUE	TRUE	TRUE	TRUE	TRUE	FALSE	FALSE	FALSE	FALSE	FALSE	FALSE	TRUE	FALSE	TRUE	FALSE	FALSE	FALSE	FALSE	TRUE	FALSE
Ef-Of-Kr-Sf_synthetic	EOkS	4mer	4.19763	TRUE	TRUE	TRUE	TRUE	FALSE	TRUE	FALSE	FALSE	FALSE	FALSE	TRUE	FALSE	TRUE	FALSE	FALSE	FALSE	FALSE	FALSE	FALSE	TRUE
Sf-Ef-Or-Kf_synthetic	SEoK	4mer	4.18681	TRUE	TRUE	TRUE	TRUE	FALSE	FALSE	TRUE	FALSE	TRUE	FALSE	FALSE	FALSE	FALSE	FALSE	FALSE	TRUE	FALSE	TRUE	FALSE	FALSE
Of-Kr-Ef-Sr_synthetic	OkEs	4mer	4.18438	TRUE	TRUE	TRUE	TRUE	FALSE	TRUE	FALSE	FALSE	FALSE	FALSE	FALSE	TRUE	FALSE	FALSE	TRUE	FALSE	TRUE	FALSE	FALSE	FALSE
Of-Kr-Ef-Sf_synthetic	OkES	4mer	4.15651	TRUE	TRUE	TRUE	TRUE	FALSE	TRUE	FALSE	FALSE	FALSE	FALSE	FALSE	TRUE	FALSE	FALSE	TRUE	FALSE	TRUE	FALSE	FALSE	FALSE
Er-Kf-Sf-Or_synthetic	eKSo	4mer	4.15642	TRUE	TRUE	TRUE	TRUE	TRUE	FALSE	FALSE	FALSE	FALSE	TRUE	FALSE	FALSE	FALSE	FALSE	TRUE	FALSE	FALSE	FALSE	FALSE	TRUE
Kf-Or-Ef-Sr_synthetic	KoEs	4mer	4.14377	TRUE	TRUE	TRUE	TRUE	FALSE	TRUE	FALSE	FALSE	FALSE	FALSE	FALSE	TRUE	TRUE	FALSE	FALSE	FALSE	FALSE	FALSE	TRUE	FALSE
Of-Sr-Ef-Kf_synthetic	OsEK	4mer	4.13571	TRUE	TRUE	TRUE	TRUE	FALSE	FALSE	TRUE	FALSE	FALSE	FALSE	FALSE	TRUE	FALSE	TRUE	FALSE	FALSE	TRUE	FALSE	FALSE	FALSE
Or-Kr-Ef-Sf_synthetic	okES	4mer	4.13212	TRUE	TRUE	TRUE	TRUE	FALSE	TRUE	FALSE	FALSE	FALSE	FALSE	FALSE	TRUE	FALSE	FALSE	TRUE	FALSE	TRUE	FALSE	FALSE	FALSE
Or-Kf-Ef_synthetic	oKE	3mer	4.12842	TRUE	FALSE	TRUE	TRUE	FALSE	FALSE	FALSE	TRUE	FALSE	FALSE	TRUE	FALSE	TRUE	FALSE	FALSE	FALSE	FALSE	FALSE	FALSE	FALSE
Kf-Sf-Ef-Of_synthetic	KSEO	4mer	4.11865	TRUE	TRUE	TRUE	TRUE	TRUE	FALSE	FALSE	FALSE	FALSE	FALSE	FALSE	TRUE	FALSE	TRUE	FALSE	FALSE	FALSE	FALSE	TRUE	FALSE
Or-Ef-Kr-Sf_synthetic	oEkS	4mer	4.11847	TRUE	TRUE	TRUE	TRUE	FALSE	TRUE	FALSE	FALSE	FALSE	FALSE	TRUE	FALSE	FALSE	FALSE	FALSE	TRUE	TRUE	FALSE	FALSE	FALSE
Er-Sr-Or-Kr_synthetic	esok	4mer	4.09884	TRUE	TRUE	TRUE	TRUE	FALSE	FALSE	TRUE	FALSE	TRUE	FALSE	FALSE	FALSE	FALSE	TRUE	FALSE	FALSE	FALSE	FALSE	FALSE	TRUE
Sf-Er-Kf-Of_synthetic	SeKO	4mer	4.0969	TRUE	TRUE	TRUE	TRUE	TRUE	FALSE	FALSE	FALSE	FALSE	FALSE	TRUE	FALSE	FALSE	FALSE	FALSE	TRUE	FALSE	TRUE	FALSE	FALSE
Kr-Er-Sr-Or_synthetic	keso	4mer	4.09006	TRUE	TRUE	TRUE	TRUE	TRUE	FALSE	FALSE	FALSE	FALSE	TRUE	FALSE	FALSE	FALSE	FALSE	FALSE	TRUE	FALSE	FALSE	TRUE	FALSE
Kr-Er-Sf-Or_synthetic	keSo	4mer	4.07667	TRUE	TRUE	TRUE	TRUE	TRUE	FALSE	FALSE	FALSE	FALSE	TRUE	FALSE	FALSE	FALSE	FALSE	FALSE	TRUE	FALSE	FALSE	TRUE	FALSE
Or-Ef-Kr-Sr_synthetic	oEks	4mer	4.06241	TRUE	TRUE	TRUE	TRUE	FALSE	TRUE	FALSE	FALSE	FALSE	FALSE	TRUE	FALSE	FALSE	FALSE	FALSE	TRUE	TRUE	FALSE	FALSE	FALSE
Kf-Or-Er-Sf_synthetic	KoeS	4mer	4.03228	TRUE	TRUE	TRUE	TRUE	FALSE	TRUE	FALSE	FALSE	FALSE	FALSE	FALSE	TRUE	TRUE	FALSE	FALSE	FALSE	FALSE	FALSE	TRUE	FALSE
Ef-Or-Kf-Sf_synthetic	EoKS	4mer	4.02603	TRUE	TRUE	TRUE	TRUE	FALSE	TRUE	FALSE	FALSE	FALSE	FALSE	TRUE	FALSE	TRUE	FALSE	FALSE	FALSE	FALSE	FALSE	FALSE	TRUE
Of-Er-Kr-Sr_synthetic	Oeks	4mer	4.00547	TRUE	TRUE	TRUE	TRUE	FALSE	TRUE	FALSE	FALSE	FALSE	FALSE	TRUE	FALSE	FALSE	FALSE	FALSE	TRUE	TRUE	FALSE	FALSE	FALSE
Kf-Ef-Or-Sr_synthetic	KEos	4mer	4.00477	TRUE	TRUE	TRUE	TRUE	FALSE	TRUE	FALSE	FALSE	TRUE	FALSE	FALSE	FALSE	FALSE	FALSE	FALSE	TRUE	FALSE	FALSE	TRUE	FALSE
Of-Kf-Ef-Sr_synthetic	OKEs	4mer	3.99226	TRUE	TRUE	TRUE	TRUE	FALSE	TRUE	FALSE	FALSE	FALSE	FALSE	FALSE	TRUE	FALSE	FALSE	TRUE	FALSE	TRUE	FALSE	FALSE	FALSE
Of-Kf-Ef-Sf_synthetic	OKES	4mer	3.99099	TRUE	TRUE	TRUE	TRUE	FALSE	TRUE	FALSE	FALSE	FALSE	FALSE	FALSE	TRUE	FALSE	FALSE	TRUE	FALSE	TRUE	FALSE	FALSE	FALSE
Sr-Kr-Ef_synthetic	skE	3mer	3.98699	FALSE	TRUE	TRUE	TRUE	FALSE	FALSE	FALSE	TRUE	FALSE	FALSE	TRUE	FALSE	FALSE	TRUE	FALSE	FALSE	FALSE	FALSE	FALSE	FALSE
Ef-Or-Sf-Kf_synthetic	EoSK	4mer	3.98629	TRUE	TRUE	TRUE	TRUE	FALSE	FALSE	TRUE	FALSE	FALSE	TRUE	FALSE	FALSE	TRUE	FALSE	FALSE	FALSE	FALSE	FALSE	FALSE	TRUE
Kr-Sr-Ef_synthetic	ksE	3mer	3.97785	FALSE	TRUE	TRUE	TRUE	FALSE	FALSE	FALSE	TRUE	FALSE	TRUE	FALSE	FALSE	FALSE	FALSE	TRUE	FALSE	FALSE	FALSE	FALSE	FALSE
Kf-Or-Er_synthetic	Koe	3mer	3.97028	TRUE	FALSE	TRUE	TRUE	FALSE	FALSE	FALSE	TRUE	TRUE	FALSE	FALSE	FALSE	FALSE	FALSE	TRUE	FALSE	FALSE	FALSE	FALSE	FALSE
Or-Kr-Ef_synthetic	okE	3mer	3.95272	TRUE	FALSE	TRUE	TRUE	FALSE	FALSE	FALSE	TRUE	FALSE	FALSE	TRUE	FALSE	TRUE	FALSE	FALSE	FALSE	FALSE	FALSE	FALSE	FALSE
Kr-Sf-Ef-Or_synthetic	kSEo	4mer	3.93958	TRUE	TRUE	TRUE	TRUE	TRUE	FALSE	FALSE	FALSE	FALSE	FALSE	FALSE	TRUE	FALSE	TRUE	FALSE	FALSE	FALSE	FALSE	TRUE	FALSE
Ef-Of-Kr_synthetic	EOk	3mer	3.93029	TRUE	FALSE	TRUE	TRUE	FALSE	FALSE	TRUE	FALSE	TRUE	FALSE	FALSE	FALSE	FALSE	FALSE	FALSE	TRUE	FALSE	FALSE	FALSE	FALSE
Of-Kr-Er-Sr_synthetic	Okes	4mer	3.92887	TRUE	TRUE	TRUE	TRUE	FALSE	TRUE	FALSE	FALSE	FALSE	FALSE	FALSE	TRUE	FALSE	FALSE	TRUE	FALSE	TRUE	FALSE	FALSE	FALSE
Er-Kr-Sr-Of_synthetic	eksO	4mer	3.92703	TRUE	TRUE	TRUE	TRUE	TRUE	FALSE	FALSE	FALSE	FALSE	TRUE	FALSE	FALSE	FALSE	FALSE	TRUE	FALSE	FALSE	FALSE	FALSE	TRUE
Sr-Or-Er-Kf_synthetic	soeK	4mer	3.91186	TRUE	TRUE	TRUE	TRUE	FALSE	FALSE	TRUE	FALSE	FALSE	FALSE	FALSE	TRUE	TRUE	FALSE	FALSE	FALSE	FALSE	TRUE	FALSE	FALSE
Kf-Or-Ef_synthetic	KoE	3mer	3.91143	TRUE	FALSE	TRUE	TRUE	FALSE	FALSE	FALSE	TRUE	TRUE	FALSE	FALSE	FALSE	FALSE	FALSE	TRUE	FALSE	FALSE	FALSE	FALSE	FALSE
Ef-Kr-Sf-Or_synthetic	EkSo	4mer	3.90968	TRUE	TRUE	TRUE	TRUE	TRUE	FALSE	FALSE	FALSE	FALSE	TRUE	FALSE	FALSE	FALSE	FALSE	TRUE	FALSE	FALSE	FALSE	FALSE	TRUE
Er-Of-Sf-Kf_synthetic	eOSK	4mer	3.90962	TRUE	TRUE	TRUE	TRUE	FALSE	FALSE	TRUE	FALSE	FALSE	TRUE	FALSE	FALSE	TRUE	FALSE	FALSE	FALSE	FALSE	FALSE	FALSE	TRUE
Sr-Ef-Or-Kr_synthetic	sEok	4mer	3.89984	TRUE	TRUE	TRUE	TRUE	FALSE	FALSE	TRUE	FALSE	TRUE	FALSE	FALSE	FALSE	FALSE	FALSE	FALSE	TRUE	FALSE	TRUE	FALSE	FALSE
Sf-Ef-Or-Kr_synthetic	SEok	4mer	3.89133	TRUE	TRUE	TRUE	TRUE	FALSE	FALSE	TRUE	FALSE	TRUE	FALSE	FALSE	FALSE	FALSE	FALSE	FALSE	TRUE	FALSE	TRUE	FALSE	FALSE
Of-Er-Kf-Sr_synthetic	OeKs	4mer	3.88627	TRUE	TRUE	TRUE	TRUE	FALSE	TRUE	FALSE	FALSE	FALSE	FALSE	TRUE	FALSE	FALSE	FALSE	FALSE	TRUE	TRUE	FALSE	FALSE	FALSE
Of-Kf-Er-Sr_synthetic	OKes	4mer	3.88615	TRUE	TRUE	TRUE	TRUE	FALSE	TRUE	FALSE	FALSE	FALSE	FALSE	FALSE	TRUE	FALSE	FALSE	TRUE	FALSE	TRUE	FALSE	FALSE	FALSE
Sf-Kr-Er-Of_synthetic	SkeO	4mer	3.88609	TRUE	TRUE	TRUE	TRUE	TRUE	FALSE	FALSE	FALSE	FALSE	FALSE	FALSE	TRUE	FALSE	FALSE	TRUE	FALSE	FALSE	TRUE	FALSE	FALSE
Kr-Ef-Sr-Of_synthetic	kEsO	4mer	3.87982	TRUE	TRUE	TRUE	TRUE	TRUE	FALSE	FALSE	FALSE	FALSE	TRUE	FALSE	FALSE	FALSE	FALSE	FALSE	TRUE	FALSE	FALSE	TRUE	FALSE
Or-Er-Sf-Kf_synthetic	oeSK	4mer	3.85443	TRUE	TRUE	TRUE	TRUE	FALSE	FALSE	TRUE	FALSE	FALSE	TRUE	FALSE	FALSE	FALSE	FALSE	FALSE	TRUE	TRUE	FALSE	FALSE	FALSE
Ef-Of-Sr-Kf_synthetic	EOsK	4mer	3.84407	TRUE	TRUE	TRUE	TRUE	FALSE	FALSE	TRUE	FALSE	FALSE	TRUE	FALSE	FALSE	TRUE	FALSE	FALSE	FALSE	FALSE	FALSE	FALSE	TRUE
Of-Ef-Kf-Sr_synthetic	OEKs	4mer	3.83393	TRUE	TRUE	TRUE	TRUE	FALSE	TRUE	FALSE	FALSE	FALSE	FALSE	TRUE	FALSE	FALSE	FALSE	FALSE	TRUE	TRUE	FALSE	FALSE	FALSE
Sf-Er-Or-Kf_synthetic	SeoK	4mer	3.78179	TRUE	TRUE	TRUE	TRUE	FALSE	FALSE	TRUE	FALSE	TRUE	FALSE	FALSE	FALSE	FALSE	FALSE	FALSE	TRUE	FALSE	TRUE	FALSE	FALSE
Er-Kr-Of-Sr_synthetic	ekOs	4mer	3.77641	TRUE	TRUE	TRUE	TRUE	FALSE	TRUE	FALSE	FALSE	TRUE	FALSE	FALSE	FALSE	FALSE	FALSE	TRUE	FALSE	FALSE	FALSE	FALSE	TRUE
Sf-Kr-Ef_synthetic	SkE	3mer	3.7716	FALSE	TRUE	TRUE	TRUE	FALSE	FALSE	FALSE	TRUE	FALSE	FALSE	TRUE	FALSE	FALSE	TRUE	FALSE	FALSE	FALSE	FALSE	FALSE	FALSE
Of-Sr-Ef-Kr_synthetic	OsEk	4mer	3.77056	TRUE	TRUE	TRUE	TRUE	FALSE	FALSE	TRUE	FALSE	FALSE	FALSE	FALSE	TRUE	FALSE	TRUE	FALSE	FALSE	TRUE	FALSE	FALSE	FALSE
Kf-Sr-Er_synthetic	Kse	3mer	3.75983	FALSE	TRUE	TRUE	TRUE	FALSE	FALSE	FALSE	TRUE	FALSE	TRUE	FALSE	FALSE	FALSE	FALSE	TRUE	FALSE	FALSE	FALSE	FALSE	FALSE
Ef-Kf-Of-Sr_synthetic	EKOs	4mer	3.74962	TRUE	TRUE	TRUE	TRUE	FALSE	TRUE	FALSE	FALSE	TRUE	FALSE	FALSE	FALSE	FALSE	FALSE	TRUE	FALSE	FALSE	FALSE	FALSE	TRUE
Kf-Of-Er-Sr_synthetic	KOes	4mer	3.749	TRUE	TRUE	TRUE	TRUE	FALSE	TRUE	FALSE	FALSE	FALSE	FALSE	FALSE	TRUE	TRUE	FALSE	FALSE	FALSE	FALSE	FALSE	TRUE	FALSE
Kr-Of-Sf-Ef_synthetic	kOSE	4mer	3.74311	TRUE	TRUE	TRUE	TRUE	FALSE	FALSE	FALSE	TRUE	FALSE	TRUE	FALSE	FALSE	TRUE	FALSE	FALSE	FALSE	FALSE	FALSE	TRUE	FALSE
Kr-Ef-Sf-Or_synthetic	kESo	4mer	3.74048	TRUE	TRUE	TRUE	TRUE	TRUE	FALSE	FALSE	FALSE	FALSE	TRUE	FALSE	FALSE	FALSE	FALSE	FALSE	TRUE	FALSE	FALSE	TRUE	FALSE
Of-Kf-Er-Sf_synthetic	OKeS	4mer	3.72715	TRUE	TRUE	TRUE	TRUE	FALSE	TRUE	FALSE	FALSE	FALSE	FALSE	FALSE	TRUE	FALSE	FALSE	TRUE	FALSE	TRUE	FALSE	FALSE	FALSE
Kr-Ef-Sr-Or_synthetic	kEso	4mer	3.72412	TRUE	TRUE	TRUE	TRUE	TRUE	FALSE	FALSE	FALSE	FALSE	TRUE	FALSE	FALSE	FALSE	FALSE	FALSE	TRUE	FALSE	FALSE	TRUE	FALSE
Or-Kr-Er_synthetic	oke	3mer	3.72249	TRUE	FALSE	TRUE	TRUE	FALSE	FALSE	FALSE	TRUE	FALSE	FALSE	TRUE	FALSE	TRUE	FALSE	FALSE	FALSE	FALSE	FALSE	FALSE	FALSE
Kf-Ef-Sr-Of_synthetic	KEsO	4mer	3.7197	TRUE	TRUE	TRUE	TRUE	TRUE	FALSE	FALSE	FALSE	FALSE	TRUE	FALSE	FALSE	FALSE	FALSE	FALSE	TRUE	FALSE	FALSE	TRUE	FALSE
Of-Er-Sr-Kf_synthetic	OesK	4mer	3.71216	TRUE	TRUE	TRUE	TRUE	FALSE	FALSE	TRUE	FALSE	FALSE	TRUE	FALSE	FALSE	FALSE	FALSE	FALSE	TRUE	TRUE	FALSE	FALSE	FALSE
Kf-Ef-Or-Sf_synthetic	KEoS	4mer	3.70476	TRUE	TRUE	TRUE	TRUE	FALSE	TRUE	FALSE	FALSE	TRUE	FALSE	FALSE	FALSE	FALSE	FALSE	FALSE	TRUE	FALSE	FALSE	TRUE	FALSE
Kr-Sf-Er-Of_synthetic	kSeO	4mer	3.70387	TRUE	TRUE	TRUE	TRUE	TRUE	FALSE	FALSE	FALSE	FALSE	FALSE	FALSE	TRUE	FALSE	TRUE	FALSE	FALSE	FALSE	FALSE	TRUE	FALSE
Kf-Ef-Sf-Of_synthetic	KESO	4mer	3.69794	TRUE	TRUE	TRUE	TRUE	TRUE	FALSE	FALSE	FALSE	FALSE	TRUE	FALSE	FALSE	FALSE	FALSE	FALSE	TRUE	FALSE	FALSE	TRUE	FALSE
Ef-Kr-Sf-Of_synthetic	EkSO	4mer	3.68264	TRUE	TRUE	TRUE	TRUE	TRUE	FALSE	FALSE	FALSE	FALSE	TRUE	FALSE	FALSE	FALSE	FALSE	TRUE	FALSE	FALSE	FALSE	FALSE	TRUE
Or-Kr-Sf_synthetic	okS	3mer	3.6701	TRUE	TRUE	TRUE	FALSE	FALSE	TRUE	FALSE	FALSE	FALSE	FALSE	TRUE	FALSE	TRUE	FALSE	FALSE	FALSE	FALSE	FALSE	FALSE	FALSE
Sf-Of-Kf_synthetic	SOK	3mer	3.66905	TRUE	TRUE	TRUE	FALSE	FALSE	FALSE	TRUE	FALSE	TRUE	FALSE	FALSE	FALSE	FALSE	TRUE	FALSE	FALSE	FALSE	FALSE	FALSE	FALSE
Kr-Or-Ef-Sr_synthetic	koEs	4mer	3.66602	TRUE	TRUE	TRUE	TRUE	FALSE	TRUE	FALSE	FALSE	FALSE	FALSE	FALSE	TRUE	TRUE	FALSE	FALSE	FALSE	FALSE	FALSE	TRUE	FALSE
Er-Of-Kf-Sf_synthetic	eOKS	4mer	3.66547	TRUE	TRUE	TRUE	TRUE	FALSE	TRUE	FALSE	FALSE	FALSE	FALSE	TRUE	FALSE	TRUE	FALSE	FALSE	FALSE	FALSE	FALSE	FALSE	TRUE
Sf-Or-Er-Kf_synthetic	SoeK	4mer	3.65196	TRUE	TRUE	TRUE	TRUE	FALSE	FALSE	TRUE	FALSE	FALSE	FALSE	FALSE	TRUE	TRUE	FALSE	FALSE	FALSE	FALSE	TRUE	FALSE	FALSE
Kf-Sr-Ef_synthetic	KsE	3mer	3.63326	FALSE	TRUE	TRUE	TRUE	FALSE	FALSE	FALSE	TRUE	FALSE	TRUE	FALSE	FALSE	FALSE	FALSE	TRUE	FALSE	FALSE	FALSE	FALSE	FALSE
Ef-Kf-Or_synthetic	EKo	3mer	3.63099	TRUE	FALSE	TRUE	TRUE	TRUE	FALSE	FALSE	FALSE	FALSE	FALSE	TRUE	FALSE	FALSE	FALSE	FALSE	TRUE	FALSE	FALSE	FALSE	FALSE
Ef-Kf-Sf-Of_synthetic	EKSO	4mer	3.62588	TRUE	TRUE	TRUE	TRUE	TRUE	FALSE	FALSE	FALSE	FALSE	TRUE	FALSE	FALSE	FALSE	FALSE	TRUE	FALSE	FALSE	FALSE	FALSE	TRUE
Er-Kf-Sr-Of_synthetic	eKsO	4mer	3.6134	TRUE	TRUE	TRUE	TRUE	TRUE	FALSE	FALSE	FALSE	FALSE	TRUE	FALSE	FALSE	FALSE	FALSE	TRUE	FALSE	FALSE	FALSE	FALSE	TRUE
Kr-Or-Er-Sf_synthetic	koeS	4mer	3.61285	TRUE	TRUE	TRUE	TRUE	FALSE	TRUE	FALSE	FALSE	FALSE	FALSE	FALSE	TRUE	TRUE	FALSE	FALSE	FALSE	FALSE	FALSE	TRUE	FALSE
Of-Sf-Er-Kr_synthetic	OSek	4mer	3.5991	TRUE	TRUE	TRUE	TRUE	FALSE	FALSE	TRUE	FALSE	FALSE	FALSE	FALSE	TRUE	FALSE	TRUE	FALSE	FALSE	TRUE	FALSE	FALSE	FALSE
Kf-Er-Of-Sr_synthetic	KeOs	4mer	3.59502	TRUE	TRUE	TRUE	TRUE	FALSE	TRUE	FALSE	FALSE	TRUE	FALSE	FALSE	FALSE	FALSE	FALSE	FALSE	TRUE	FALSE	FALSE	TRUE	FALSE
Kr-Ef-Or-Sr_synthetic	kEos	4mer	3.57818	TRUE	TRUE	TRUE	TRUE	FALSE	TRUE	FALSE	FALSE	TRUE	FALSE	FALSE	FALSE	FALSE	FALSE	FALSE	TRUE	FALSE	FALSE	TRUE	FALSE
Kr-Sr-Er_synthetic	kse	3mer	3.56427	FALSE	TRUE	TRUE	TRUE	FALSE	FALSE	FALSE	TRUE	FALSE	TRUE	FALSE	FALSE	FALSE	FALSE	TRUE	FALSE	FALSE	FALSE	FALSE	FALSE
Er-Kf-Or_synthetic	eKo	3mer	3.56254	TRUE	FALSE	TRUE	TRUE	TRUE	FALSE	FALSE	FALSE	FALSE	FALSE	TRUE	FALSE	FALSE	FALSE	FALSE	TRUE	FALSE	FALSE	FALSE	FALSE
Kr-Or-Er_synthetic	koe	3mer	3.55564	TRUE	FALSE	TRUE	TRUE	FALSE	FALSE	FALSE	TRUE	TRUE	FALSE	FALSE	FALSE	FALSE	FALSE	TRUE	FALSE	FALSE	FALSE	FALSE	FALSE
Kf-Of-Ef-Sf_synthetic	KOES	4mer	3.53632	TRUE	TRUE	TRUE	TRUE	FALSE	TRUE	FALSE	FALSE	FALSE	FALSE	FALSE	TRUE	TRUE	FALSE	FALSE	FALSE	FALSE	FALSE	TRUE	FALSE
Kf-Er-Sr-Or_synthetic	Keso	4mer	3.53412	TRUE	TRUE	TRUE	TRUE	TRUE	FALSE	FALSE	FALSE	FALSE	TRUE	FALSE	FALSE	FALSE	FALSE	FALSE	TRUE	FALSE	FALSE	TRUE	FALSE
Ef-Of-Kf-Sf_synthetic	EOKS	4mer	3.52286	TRUE	TRUE	TRUE	TRUE	FALSE	TRUE	FALSE	FALSE	FALSE	FALSE	TRUE	FALSE	TRUE	FALSE	FALSE	FALSE	FALSE	FALSE	FALSE	TRUE
Er-Kf-Of-Sr_synthetic	eKOs	4mer	3.51528	TRUE	TRUE	TRUE	TRUE	FALSE	TRUE	FALSE	FALSE	TRUE	FALSE	FALSE	FALSE	FALSE	FALSE	TRUE	FALSE	FALSE	FALSE	FALSE	TRUE
Or-Er-Kf-Sf_synthetic	oeKS	4mer	3.51179	TRUE	TRUE	TRUE	TRUE	FALSE	TRUE	FALSE	FALSE	FALSE	FALSE	TRUE	FALSE	FALSE	FALSE	FALSE	TRUE	TRUE	FALSE	FALSE	FALSE
Kr-Of-Ef-Sr_synthetic	kOEs	4mer	3.50055	TRUE	TRUE	TRUE	TRUE	FALSE	TRUE	FALSE	FALSE	FALSE	FALSE	FALSE	TRUE	TRUE	FALSE	FALSE	FALSE	FALSE	FALSE	TRUE	FALSE
Kr-Er-Or-Sr_synthetic	keos	4mer	3.49911	TRUE	TRUE	TRUE	TRUE	FALSE	TRUE	FALSE	FALSE	TRUE	FALSE	FALSE	FALSE	FALSE	FALSE	FALSE	TRUE	FALSE	FALSE	TRUE	FALSE
Of-Er-Kr-Sf_synthetic	OekS	4mer	3.49636	TRUE	TRUE	TRUE	TRUE	FALSE	TRUE	FALSE	FALSE	FALSE	FALSE	TRUE	FALSE	FALSE	FALSE	FALSE	TRUE	TRUE	FALSE	FALSE	FALSE
Kr-Ef-Sf-Of_synthetic	kESO	4mer	3.49465	TRUE	TRUE	TRUE	TRUE	TRUE	FALSE	FALSE	FALSE	FALSE	TRUE	FALSE	FALSE	FALSE	FALSE	FALSE	TRUE	FALSE	FALSE	TRUE	FALSE
Kr-Or-Ef_synthetic	koE	3mer	3.48307	TRUE	FALSE	TRUE	TRUE	FALSE	FALSE	FALSE	TRUE	TRUE	FALSE	FALSE	FALSE	FALSE	FALSE	TRUE	FALSE	FALSE	FALSE	FALSE	FALSE
Sf-Ef-Kr-Of_synthetic	SEkO	4mer	3.4682	TRUE	TRUE	TRUE	TRUE	TRUE	FALSE	FALSE	FALSE	FALSE	FALSE	TRUE	FALSE	FALSE	FALSE	FALSE	TRUE	FALSE	TRUE	FALSE	FALSE
Er-Kr-Or_synthetic	eko	3mer	3.46446	TRUE	FALSE	TRUE	TRUE	TRUE	FALSE	FALSE	FALSE	FALSE	FALSE	TRUE	FALSE	FALSE	FALSE	FALSE	TRUE	FALSE	FALSE	FALSE	FALSE
Ef-Kr-Or-Sf_synthetic	EkoS	4mer	3.45624	TRUE	TRUE	TRUE	TRUE	FALSE	TRUE	FALSE	FALSE	TRUE	FALSE	FALSE	FALSE	FALSE	FALSE	TRUE	FALSE	FALSE	FALSE	FALSE	TRUE
Kf-Er-Sr-Of_synthetic	KesO	4mer	3.4539	TRUE	TRUE	TRUE	TRUE	TRUE	FALSE	FALSE	FALSE	FALSE	TRUE	FALSE	FALSE	FALSE	FALSE	FALSE	TRUE	FALSE	FALSE	TRUE	FALSE
Sr-Kf-Er_synthetic	sKe	3mer	3.45275	FALSE	TRUE	TRUE	TRUE	FALSE	FALSE	FALSE	TRUE	FALSE	FALSE	TRUE	FALSE	FALSE	TRUE	FALSE	FALSE	FALSE	FALSE	FALSE	FALSE
Kf-Er-Or-Sf_synthetic	KeoS	4mer	3.45232	TRUE	TRUE	TRUE	TRUE	FALSE	TRUE	FALSE	FALSE	TRUE	FALSE	FALSE	FALSE	FALSE	FALSE	FALSE	TRUE	FALSE	FALSE	TRUE	FALSE
Ef-Sf-Kr_synthetic	ESk	3mer	3.45064	FALSE	TRUE	TRUE	TRUE	FALSE	FALSE	TRUE	FALSE	FALSE	TRUE	FALSE	FALSE	FALSE	FALSE	FALSE	TRUE	FALSE	FALSE	FALSE	FALSE
Of-Ef-Sr-Kr_synthetic	OEsk	4mer	3.4502	TRUE	TRUE	TRUE	TRUE	FALSE	FALSE	TRUE	FALSE	FALSE	TRUE	FALSE	FALSE	FALSE	FALSE	FALSE	TRUE	TRUE	FALSE	FALSE	FALSE
Ef-Of-Sf-Kr_synthetic	EOSk	4mer	3.44436	TRUE	TRUE	TRUE	TRUE	FALSE	FALSE	TRUE	FALSE	FALSE	TRUE	FALSE	FALSE	TRUE	FALSE	FALSE	FALSE	FALSE	FALSE	FALSE	TRUE
Kf-Ef-Sr-Or_synthetic	KEso	4mer	3.43127	TRUE	TRUE	TRUE	TRUE	TRUE	FALSE	FALSE	FALSE	FALSE	TRUE	FALSE	FALSE	FALSE	FALSE	FALSE	TRUE	FALSE	FALSE	TRUE	FALSE
Ef-Kr-Or_synthetic	Eko	3mer	3.40182	TRUE	FALSE	TRUE	TRUE	TRUE	FALSE	FALSE	FALSE	FALSE	FALSE	TRUE	FALSE	FALSE	FALSE	FALSE	TRUE	FALSE	FALSE	FALSE	FALSE
Kr-Of-Er-Sf_synthetic	kOeS	4mer	3.3981	TRUE	TRUE	TRUE	TRUE	FALSE	TRUE	FALSE	FALSE	FALSE	FALSE	FALSE	TRUE	TRUE	FALSE	FALSE	FALSE	FALSE	FALSE	TRUE	FALSE
Of-Sr-Er-Kf_synthetic	OseK	4mer	3.39006	TRUE	TRUE	TRUE	TRUE	FALSE	FALSE	TRUE	FALSE	FALSE	FALSE	FALSE	TRUE	FALSE	TRUE	FALSE	FALSE	TRUE	FALSE	FALSE	FALSE
Of-Sf-Ef-Kr_synthetic	OSEk	4mer	3.38628	TRUE	TRUE	TRUE	TRUE	FALSE	FALSE	TRUE	FALSE	FALSE	FALSE	FALSE	TRUE	FALSE	TRUE	FALSE	FALSE	TRUE	FALSE	FALSE	FALSE
Kr-Er-Sr-Of_synthetic	kesO	4mer	3.3849	TRUE	TRUE	TRUE	TRUE	TRUE	FALSE	FALSE	FALSE	FALSE	TRUE	FALSE	FALSE	FALSE	FALSE	FALSE	TRUE	FALSE	FALSE	TRUE	FALSE
Sr-Kf-Of_synthetic	sKO	3mer	3.36213	TRUE	TRUE	TRUE	FALSE	TRUE	FALSE	FALSE	FALSE	FALSE	FALSE	TRUE	FALSE	FALSE	TRUE	FALSE	FALSE	FALSE	FALSE	FALSE	FALSE
Kf-Of-Er-Sf_synthetic	KOeS	4mer	3.35204	TRUE	TRUE	TRUE	TRUE	FALSE	TRUE	FALSE	FALSE	FALSE	FALSE	FALSE	TRUE	TRUE	FALSE	FALSE	FALSE	FALSE	FALSE	TRUE	FALSE
Of-Er-Sf-Kr_synthetic	OeSk	4mer	3.3423	TRUE	TRUE	TRUE	TRUE	FALSE	FALSE	TRUE	FALSE	FALSE	TRUE	FALSE	FALSE	FALSE	FALSE	FALSE	TRUE	TRUE	FALSE	FALSE	FALSE
Of-Er-Sr-Kr_synthetic	Oesk	4mer	3.34112	TRUE	TRUE	TRUE	TRUE	FALSE	FALSE	TRUE	FALSE	FALSE	TRUE	FALSE	FALSE	FALSE	FALSE	FALSE	TRUE	TRUE	FALSE	FALSE	FALSE
Sf-Kf-Or_synthetic	SKo	3mer	3.3403	TRUE	TRUE	TRUE	FALSE	TRUE	FALSE	FALSE	FALSE	FALSE	FALSE	TRUE	FALSE	FALSE	TRUE	FALSE	FALSE	FALSE	FALSE	FALSE	FALSE
Sr-Kr-Of_synthetic	skO	3mer	3.3367	TRUE	TRUE	TRUE	FALSE	TRUE	FALSE	FALSE	FALSE	FALSE	FALSE	TRUE	FALSE	FALSE	TRUE	FALSE	FALSE	FALSE	FALSE	FALSE	FALSE
Sf-Kr-Or_synthetic	Sko	3mer	3.32669	TRUE	TRUE	TRUE	FALSE	TRUE	FALSE	FALSE	FALSE	FALSE	FALSE	TRUE	FALSE	FALSE	TRUE	FALSE	FALSE	FALSE	FALSE	FALSE	FALSE
Kf-Er-Or-Sr_synthetic	Keos	4mer	3.32434	TRUE	TRUE	TRUE	TRUE	FALSE	TRUE	FALSE	FALSE	TRUE	FALSE	FALSE	FALSE	FALSE	FALSE	FALSE	TRUE	FALSE	FALSE	TRUE	FALSE
Of-Ef-Kr-Sr_synthetic	OEks	4mer	3.32129	TRUE	TRUE	TRUE	TRUE	FALSE	TRUE	FALSE	FALSE	FALSE	FALSE	TRUE	FALSE	FALSE	FALSE	FALSE	TRUE	TRUE	FALSE	FALSE	FALSE
Of-Sf-Ef-Kf_synthetic	OSEK	4mer	3.29588	TRUE	TRUE	TRUE	TRUE	FALSE	FALSE	TRUE	FALSE	FALSE	FALSE	FALSE	TRUE	FALSE	TRUE	FALSE	FALSE	TRUE	FALSE	FALSE	FALSE
Er-Of-Kr_synthetic	eOk	3mer	3.28513	TRUE	FALSE	TRUE	TRUE	FALSE	FALSE	TRUE	FALSE	TRUE	FALSE	FALSE	FALSE	FALSE	FALSE	FALSE	TRUE	FALSE	FALSE	FALSE	FALSE
Ef-Of-Sf-Kf_synthetic	EOSK	4mer	3.25985	TRUE	TRUE	TRUE	TRUE	FALSE	FALSE	TRUE	FALSE	FALSE	TRUE	FALSE	FALSE	TRUE	FALSE	FALSE	FALSE	FALSE	FALSE	FALSE	TRUE
Kr-Ef-Or-Sf_synthetic	kEoS	4mer	3.25974	TRUE	TRUE	TRUE	TRUE	FALSE	TRUE	FALSE	FALSE	TRUE	FALSE	FALSE	FALSE	FALSE	FALSE	FALSE	TRUE	FALSE	FALSE	TRUE	FALSE
Or-Ef-Kf-Sf_synthetic	oEKS	4mer	3.25589	TRUE	TRUE	TRUE	TRUE	FALSE	TRUE	FALSE	FALSE	FALSE	FALSE	TRUE	FALSE	FALSE	FALSE	FALSE	TRUE	TRUE	FALSE	FALSE	FALSE
Kf-Ef-Or_synthetic	KEo	3mer	3.24226	TRUE	FALSE	TRUE	TRUE	TRUE	FALSE	FALSE	FALSE	FALSE	FALSE	FALSE	TRUE	FALSE	FALSE	TRUE	FALSE	FALSE	FALSE	FALSE	FALSE
Kr-Er-Of-Sr_synthetic	keOs	4mer	3.23223	TRUE	TRUE	TRUE	TRUE	FALSE	TRUE	FALSE	FALSE	TRUE	FALSE	FALSE	FALSE	FALSE	FALSE	FALSE	TRUE	FALSE	FALSE	TRUE	FALSE
Sr-Er-Kr_synthetic	sek	3mer	3.2321	FALSE	TRUE	TRUE	TRUE	FALSE	FALSE	TRUE	FALSE	FALSE	FALSE	FALSE	TRUE	FALSE	TRUE	FALSE	FALSE	FALSE	FALSE	FALSE	FALSE
Kr-Of-Er-Sr_synthetic	kOes	4mer	3.22384	TRUE	TRUE	TRUE	TRUE	FALSE	TRUE	FALSE	FALSE	FALSE	FALSE	FALSE	TRUE	TRUE	FALSE	FALSE	FALSE	FALSE	FALSE	TRUE	FALSE
Ef-Kr-Of-Sf_synthetic	EkOS	4mer	3.21468	TRUE	TRUE	TRUE	TRUE	FALSE	TRUE	FALSE	FALSE	TRUE	FALSE	FALSE	FALSE	FALSE	FALSE	TRUE	FALSE	FALSE	FALSE	FALSE	TRUE
Kf-Er-Sf-Or_synthetic	KeSo	4mer	3.20246	TRUE	TRUE	TRUE	TRUE	TRUE	FALSE	FALSE	FALSE	FALSE	TRUE	FALSE	FALSE	FALSE	FALSE	FALSE	TRUE	FALSE	FALSE	TRUE	FALSE
Kr-Ef-Or_synthetic	kEo	3mer	3.19789	TRUE	FALSE	TRUE	TRUE	TRUE	FALSE	FALSE	FALSE	FALSE	FALSE	FALSE	TRUE	FALSE	FALSE	TRUE	FALSE	FALSE	FALSE	FALSE	FALSE
Sf-Or-Ef-Kr_synthetic	SoEk	4mer	3.18419	TRUE	TRUE	TRUE	TRUE	FALSE	FALSE	TRUE	FALSE	FALSE	FALSE	FALSE	TRUE	TRUE	FALSE	FALSE	FALSE	FALSE	TRUE	FALSE	FALSE
Of-Kr-Ef_synthetic	OkE	3mer	3.18321	TRUE	FALSE	TRUE	TRUE	FALSE	FALSE	FALSE	TRUE	FALSE	FALSE	TRUE	FALSE	TRUE	FALSE	FALSE	FALSE	FALSE	FALSE	FALSE	FALSE
Kf-Ef-Of-Sr_synthetic	KEOs	4mer	3.16405	TRUE	TRUE	TRUE	TRUE	FALSE	TRUE	FALSE	FALSE	TRUE	FALSE	FALSE	FALSE	FALSE	FALSE	FALSE	TRUE	FALSE	FALSE	TRUE	FALSE
Kr-Er-Or-Sf_synthetic	keoS	4mer	3.16404	TRUE	TRUE	TRUE	TRUE	FALSE	TRUE	FALSE	FALSE	TRUE	FALSE	FALSE	FALSE	FALSE	FALSE	FALSE	TRUE	FALSE	FALSE	TRUE	FALSE
Sr-Kr-Er_synthetic	ske	3mer	3.16157	FALSE	TRUE	TRUE	TRUE	FALSE	FALSE	FALSE	TRUE	FALSE	FALSE	TRUE	FALSE	FALSE	TRUE	FALSE	FALSE	FALSE	FALSE	FALSE	FALSE
Or-Ef-Kr_synthetic	oEk	3mer	3.16144	TRUE	FALSE	TRUE	TRUE	FALSE	FALSE	TRUE	FALSE	FALSE	FALSE	FALSE	TRUE	TRUE	FALSE	FALSE	FALSE	FALSE	FALSE	FALSE	FALSE
Sf-Kf-Er_synthetic	SKe	3mer	3.15921	FALSE	TRUE	TRUE	TRUE	FALSE	FALSE	FALSE	TRUE	FALSE	FALSE	TRUE	FALSE	FALSE	TRUE	FALSE	FALSE	FALSE	FALSE	FALSE	FALSE
Kr-Er-Sf-Of_synthetic	keSO	4mer	3.13846	TRUE	TRUE	TRUE	TRUE	TRUE	FALSE	FALSE	FALSE	FALSE	TRUE	FALSE	FALSE	FALSE	FALSE	FALSE	TRUE	FALSE	FALSE	TRUE	FALSE
Sf-Kr-Of_synthetic	SkO	3mer	3.13522	TRUE	TRUE	TRUE	FALSE	TRUE	FALSE	FALSE	FALSE	FALSE	FALSE	TRUE	FALSE	FALSE	TRUE	FALSE	FALSE	FALSE	FALSE	FALSE	FALSE
Of-Ef-Sf-Kf_synthetic	OESK	4mer	3.13118	TRUE	TRUE	TRUE	TRUE	FALSE	FALSE	TRUE	FALSE	FALSE	TRUE	FALSE	FALSE	FALSE	FALSE	FALSE	TRUE	TRUE	FALSE	FALSE	FALSE
Kf-Sf-Er_synthetic	KSe	3mer	3.12283	FALSE	TRUE	TRUE	TRUE	FALSE	FALSE	FALSE	TRUE	FALSE	TRUE	FALSE	FALSE	FALSE	FALSE	TRUE	FALSE	FALSE	FALSE	FALSE	FALSE
Sr-Ef-Kf_synthetic	sEK	3mer	3.10608	FALSE	TRUE	TRUE	TRUE	FALSE	FALSE	TRUE	FALSE	FALSE	FALSE	FALSE	TRUE	FALSE	TRUE	FALSE	FALSE	FALSE	FALSE	FALSE	FALSE
Of-Kr-Er_synthetic	Oke	3mer	3.10113	TRUE	FALSE	TRUE	TRUE	FALSE	FALSE	FALSE	TRUE	FALSE	FALSE	TRUE	FALSE	TRUE	FALSE	FALSE	FALSE	FALSE	FALSE	FALSE	FALSE
Er-Kf-Of-Sf_synthetic	eKOS	4mer	3.09756	TRUE	TRUE	TRUE	TRUE	FALSE	TRUE	FALSE	FALSE	TRUE	FALSE	FALSE	FALSE	FALSE	FALSE	TRUE	FALSE	FALSE	FALSE	FALSE	TRUE
Of-Er-Kf-Sf_synthetic	OeKS	4mer	3.08193	TRUE	TRUE	TRUE	TRUE	FALSE	TRUE	FALSE	FALSE	FALSE	FALSE	TRUE	FALSE	FALSE	FALSE	FALSE	TRUE	TRUE	FALSE	FALSE	FALSE
Kf-Er-Sf-Of_synthetic	KeSO	4mer	3.06487	TRUE	TRUE	TRUE	TRUE	TRUE	FALSE	FALSE	FALSE	FALSE	TRUE	FALSE	FALSE	FALSE	FALSE	FALSE	TRUE	FALSE	FALSE	TRUE	FALSE
Of-Kf-Ef_synthetic	OKE	3mer	3.05981	TRUE	FALSE	TRUE	TRUE	FALSE	FALSE	FALSE	TRUE	FALSE	FALSE	TRUE	FALSE	TRUE	FALSE	FALSE	FALSE	FALSE	FALSE	FALSE	FALSE
Of-Ef-Kr-Sf_synthetic	OEkS	4mer	3.05141	TRUE	TRUE	TRUE	TRUE	FALSE	TRUE	FALSE	FALSE	FALSE	FALSE	TRUE	FALSE	FALSE	FALSE	FALSE	TRUE	TRUE	FALSE	FALSE	FALSE
Or-Sf-Kr_synthetic	oSk	3mer	3.05044	TRUE	TRUE	TRUE	FALSE	FALSE	FALSE	TRUE	FALSE	FALSE	TRUE	FALSE	FALSE	TRUE	FALSE	FALSE	FALSE	FALSE	FALSE	FALSE	FALSE
Of-Ef-Sr-Kf_synthetic	OEsK	4mer	3.04498	TRUE	TRUE	TRUE	TRUE	FALSE	FALSE	TRUE	FALSE	FALSE	TRUE	FALSE	FALSE	FALSE	FALSE	FALSE	TRUE	TRUE	FALSE	FALSE	FALSE
Ef-Sr-Kr_synthetic	Esk	3mer	3.04461	FALSE	TRUE	TRUE	TRUE	FALSE	FALSE	TRUE	FALSE	FALSE	TRUE	FALSE	FALSE	FALSE	FALSE	FALSE	TRUE	FALSE	FALSE	FALSE	FALSE
Kr-Of-Ef-Sf_synthetic	kOES	4mer	3.03543	TRUE	TRUE	TRUE	TRUE	FALSE	TRUE	FALSE	FALSE	FALSE	FALSE	FALSE	TRUE	TRUE	FALSE	FALSE	FALSE	FALSE	FALSE	TRUE	FALSE
Kf-Of-Ef-Sr_synthetic	KOEs	4mer	3.01209	TRUE	TRUE	TRUE	TRUE	FALSE	TRUE	FALSE	FALSE	FALSE	FALSE	FALSE	TRUE	TRUE	FALSE	FALSE	FALSE	FALSE	FALSE	TRUE	FALSE
Sr-Kf-Or_synthetic	sKo	3mer	3.00975	TRUE	TRUE	TRUE	FALSE	TRUE	FALSE	FALSE	FALSE	FALSE	FALSE	TRUE	FALSE	FALSE	TRUE	FALSE	FALSE	FALSE	FALSE	FALSE	FALSE
Of-Sf-Er-Kf_synthetic	OSeK	4mer	3.00958	TRUE	TRUE	TRUE	TRUE	FALSE	FALSE	TRUE	FALSE	FALSE	FALSE	FALSE	TRUE	FALSE	TRUE	FALSE	FALSE	TRUE	FALSE	FALSE	FALSE
Er-Sr-Kr_synthetic	esk	3mer	2.99519	FALSE	TRUE	TRUE	TRUE	FALSE	FALSE	TRUE	FALSE	FALSE	TRUE	FALSE	FALSE	FALSE	FALSE	FALSE	TRUE	FALSE	FALSE	FALSE	FALSE
Kf-Er-Or_synthetic	Keo	3mer	2.99276	TRUE	FALSE	TRUE	TRUE	TRUE	FALSE	FALSE	FALSE	FALSE	FALSE	FALSE	TRUE	FALSE	FALSE	TRUE	FALSE	FALSE	FALSE	FALSE	FALSE
Kf-Sf-Ef_synthetic	KSE	3mer	2.98872	FALSE	TRUE	TRUE	TRUE	FALSE	FALSE	FALSE	TRUE	FALSE	TRUE	FALSE	FALSE	FALSE	FALSE	TRUE	FALSE	FALSE	FALSE	FALSE	FALSE
Ef-Kf-Of-Sf_synthetic	EKOS	4mer	2.94616	TRUE	TRUE	TRUE	TRUE	FALSE	TRUE	FALSE	FALSE	TRUE	FALSE	FALSE	FALSE	FALSE	FALSE	TRUE	FALSE	FALSE	FALSE	FALSE	TRUE
Of-Kf-Er_synthetic	OKe	3mer	2.94519	TRUE	FALSE	TRUE	TRUE	FALSE	FALSE	FALSE	TRUE	FALSE	FALSE	TRUE	FALSE	TRUE	FALSE	FALSE	FALSE	FALSE	FALSE	FALSE	FALSE
Kf-Ef-Of-Sf_synthetic	KEOS	4mer	2.92173	TRUE	TRUE	TRUE	TRUE	FALSE	TRUE	FALSE	FALSE	TRUE	FALSE	FALSE	FALSE	FALSE	FALSE	FALSE	TRUE	FALSE	FALSE	TRUE	FALSE
Kr-Of-Ef_synthetic	kOE	3mer	2.90443	TRUE	FALSE	TRUE	TRUE	FALSE	FALSE	FALSE	TRUE	TRUE	FALSE	FALSE	FALSE	FALSE	FALSE	TRUE	FALSE	FALSE	FALSE	FALSE	FALSE
Er-Kr-Of_synthetic	ekO	3mer	2.89181	TRUE	FALSE	TRUE	TRUE	TRUE	FALSE	FALSE	FALSE	FALSE	FALSE	TRUE	FALSE	FALSE	FALSE	FALSE	TRUE	FALSE	FALSE	FALSE	FALSE
Ef-Of-Kf_synthetic	EOK	3mer	2.88804	TRUE	FALSE	TRUE	TRUE	FALSE	FALSE	TRUE	FALSE	TRUE	FALSE	FALSE	FALSE	FALSE	FALSE	FALSE	TRUE	FALSE	FALSE	FALSE	FALSE
Sf-Kr-Er_synthetic	Ske	3mer	2.87347	FALSE	TRUE	TRUE	TRUE	FALSE	FALSE	FALSE	TRUE	FALSE	FALSE	TRUE	FALSE	FALSE	TRUE	FALSE	FALSE	FALSE	FALSE	FALSE	FALSE
Kf-Of-Er_synthetic	KOe	3mer	2.87298	TRUE	FALSE	TRUE	TRUE	FALSE	FALSE	FALSE	TRUE	TRUE	FALSE	FALSE	FALSE	FALSE	FALSE	TRUE	FALSE	FALSE	FALSE	FALSE	FALSE
Kr-Sf-Ef_synthetic	kSE	3mer	2.87238	FALSE	TRUE	TRUE	TRUE	FALSE	FALSE	FALSE	TRUE	FALSE	TRUE	FALSE	FALSE	FALSE	FALSE	TRUE	FALSE	FALSE	FALSE	FALSE	FALSE
Or-Kf-Sr_synthetic	oKs	3mer	2.86542	TRUE	TRUE	TRUE	FALSE	FALSE	TRUE	FALSE	FALSE	FALSE	FALSE	TRUE	FALSE	TRUE	FALSE	FALSE	FALSE	FALSE	FALSE	FALSE	FALSE
Kf-Er-Sf_synthetic	KeS	3mer	2.85063	FALSE	TRUE	TRUE	TRUE	FALSE	TRUE	FALSE	FALSE	FALSE	FALSE	FALSE	TRUE	FALSE	FALSE	TRUE	FALSE	FALSE	FALSE	FALSE	FALSE
Er-Kr-Of-Sf_synthetic	ekOS	4mer	2.84828	TRUE	TRUE	TRUE	TRUE	FALSE	TRUE	FALSE	FALSE	TRUE	FALSE	FALSE	FALSE	FALSE	FALSE	TRUE	FALSE	FALSE	FALSE	FALSE	TRUE
Kf-Of-Ef_synthetic	KOE	3mer	2.82203	TRUE	FALSE	TRUE	TRUE	FALSE	FALSE	FALSE	TRUE	TRUE	FALSE	FALSE	FALSE	FALSE	FALSE	TRUE	FALSE	FALSE	FALSE	FALSE	FALSE
Or-Sr-Kr_synthetic	osk	3mer	2.76708	TRUE	TRUE	TRUE	FALSE	FALSE	FALSE	TRUE	FALSE	FALSE	TRUE	FALSE	FALSE	TRUE	FALSE	FALSE	FALSE	FALSE	FALSE	FALSE	FALSE
Ef-Or-Kr_synthetic	Eok	3mer	2.75409	TRUE	FALSE	TRUE	TRUE	FALSE	FALSE	TRUE	FALSE	TRUE	FALSE	FALSE	FALSE	FALSE	FALSE	FALSE	TRUE	FALSE	FALSE	FALSE	FALSE
Kf-Er-Of-Sf_synthetic	KeOS	4mer	2.74988	TRUE	TRUE	TRUE	TRUE	FALSE	TRUE	FALSE	FALSE	TRUE	FALSE	FALSE	FALSE	FALSE	FALSE	FALSE	TRUE	FALSE	FALSE	TRUE	FALSE
Sf-Er-Kr_synthetic	Sek	3mer	2.74587	FALSE	TRUE	TRUE	TRUE	FALSE	FALSE	TRUE	FALSE	FALSE	FALSE	FALSE	TRUE	FALSE	TRUE	FALSE	FALSE	FALSE	FALSE	FALSE	FALSE
Er-Kf-Sr_synthetic	eKs	3mer	2.73079	FALSE	TRUE	TRUE	TRUE	FALSE	TRUE	FALSE	FALSE	FALSE	FALSE	TRUE	FALSE	FALSE	FALSE	FALSE	TRUE	FALSE	FALSE	FALSE	FALSE
Kr-Ef-Of-Sf_synthetic	kEOS	4mer	2.72628	TRUE	TRUE	TRUE	TRUE	FALSE	TRUE	FALSE	FALSE	TRUE	FALSE	FALSE	FALSE	FALSE	FALSE	FALSE	TRUE	FALSE	FALSE	TRUE	FALSE
Of-Ef-Kf-Sf_synthetic	OEKS	4mer	2.72615	TRUE	TRUE	TRUE	TRUE	FALSE	TRUE	FALSE	FALSE	FALSE	FALSE	TRUE	FALSE	FALSE	FALSE	FALSE	TRUE	TRUE	FALSE	FALSE	FALSE
Or-Er-Kr_synthetic	oek	3mer	2.72518	TRUE	FALSE	TRUE	TRUE	FALSE	FALSE	TRUE	FALSE	FALSE	FALSE	FALSE	TRUE	TRUE	FALSE	FALSE	FALSE	FALSE	FALSE	FALSE	FALSE
Of-Er-Sf-Kf_synthetic	OeSK	4mer	2.71709	TRUE	TRUE	TRUE	TRUE	FALSE	FALSE	TRUE	FALSE	FALSE	TRUE	FALSE	FALSE	FALSE	FALSE	FALSE	TRUE	TRUE	FALSE	FALSE	FALSE
Or-Sr-Kf_synthetic	osK	3mer	2.71668	TRUE	TRUE	TRUE	FALSE	FALSE	FALSE	TRUE	FALSE	FALSE	TRUE	FALSE	FALSE	TRUE	FALSE	FALSE	FALSE	FALSE	FALSE	FALSE	FALSE
Ef-Sr-Kf_synthetic	EsK	3mer	2.71517	FALSE	TRUE	TRUE	TRUE	FALSE	FALSE	TRUE	FALSE	FALSE	TRUE	FALSE	FALSE	FALSE	FALSE	FALSE	TRUE	FALSE	FALSE	FALSE	FALSE
Kr-Er-Sr_synthetic	kes	3mer	2.71301	FALSE	TRUE	TRUE	TRUE	FALSE	TRUE	FALSE	FALSE	FALSE	FALSE	FALSE	TRUE	FALSE	FALSE	TRUE	FALSE	FALSE	FALSE	FALSE	FALSE
Kr-Er-Of-Sf_synthetic	keOS	4mer	2.70804	TRUE	TRUE	TRUE	TRUE	FALSE	TRUE	FALSE	FALSE	TRUE	FALSE	FALSE	FALSE	FALSE	FALSE	FALSE	TRUE	FALSE	FALSE	TRUE	FALSE
Kf-Sr-Of_synthetic	KsO	3mer	2.69774	TRUE	TRUE	TRUE	FALSE	TRUE	FALSE	FALSE	FALSE	FALSE	TRUE	FALSE	FALSE	FALSE	FALSE	TRUE	FALSE	FALSE	FALSE	FALSE	FALSE
Or-Kr-Sr_synthetic	oks	3mer	2.69083	TRUE	TRUE	TRUE	FALSE	FALSE	TRUE	FALSE	FALSE	FALSE	FALSE	TRUE	FALSE	TRUE	FALSE	FALSE	FALSE	FALSE	FALSE	FALSE	FALSE
Kr-Sf-Er_synthetic	kSe	3mer	2.66155	FALSE	TRUE	TRUE	TRUE	FALSE	FALSE	FALSE	TRUE	FALSE	TRUE	FALSE	FALSE	FALSE	FALSE	TRUE	FALSE	FALSE	FALSE	FALSE	FALSE
Er-Of-Kf_synthetic	eOK	3mer	2.63853	TRUE	FALSE	TRUE	TRUE	FALSE	FALSE	TRUE	FALSE	TRUE	FALSE	FALSE	FALSE	FALSE	FALSE	FALSE	TRUE	FALSE	FALSE	FALSE	FALSE
Sr-Or-Kf_synthetic	soK	3mer	2.63264	TRUE	TRUE	TRUE	FALSE	FALSE	FALSE	TRUE	FALSE	TRUE	FALSE	FALSE	FALSE	FALSE	TRUE	FALSE	FALSE	FALSE	FALSE	FALSE	FALSE
Kr-Of-Er_synthetic	kOe	3mer	2.62	TRUE	FALSE	TRUE	TRUE	FALSE	FALSE	FALSE	TRUE	TRUE	FALSE	FALSE	FALSE	FALSE	FALSE	TRUE	FALSE	FALSE	FALSE	FALSE	FALSE
Er-Sr-Kf_synthetic	esK	3mer	2.61068	FALSE	TRUE	TRUE	TRUE	FALSE	FALSE	TRUE	FALSE	FALSE	TRUE	FALSE	FALSE	FALSE	FALSE	FALSE	TRUE	FALSE	FALSE	FALSE	FALSE
Ef-Kr-Of-Sr_synthetic	EkOs	4mer	2.60782	TRUE	TRUE	TRUE	TRUE	FALSE	TRUE	FALSE	FALSE	TRUE	FALSE	FALSE	FALSE	FALSE	FALSE	TRUE	FALSE	FALSE	FALSE	FALSE	TRUE
Kr-Er-Or_synthetic	keo	3mer	2.60695	TRUE	FALSE	TRUE	TRUE	TRUE	FALSE	FALSE	FALSE	FALSE	FALSE	FALSE	TRUE	FALSE	FALSE	TRUE	FALSE	FALSE	FALSE	FALSE	FALSE
Sr-Ef-Kr_synthetic	sEk	3mer	2.6031	FALSE	TRUE	TRUE	TRUE	FALSE	FALSE	TRUE	FALSE	FALSE	FALSE	FALSE	TRUE	FALSE	TRUE	FALSE	FALSE	FALSE	FALSE	FALSE	FALSE
Er-Or-Kr_synthetic	eok	3mer	2.59194	TRUE	FALSE	TRUE	TRUE	FALSE	FALSE	TRUE	FALSE	TRUE	FALSE	FALSE	FALSE	FALSE	FALSE	FALSE	TRUE	FALSE	FALSE	FALSE	FALSE
Kr-Ef-Of-Sr_synthetic	kEOs	4mer	2.56076	TRUE	TRUE	TRUE	TRUE	FALSE	TRUE	FALSE	FALSE	TRUE	FALSE	FALSE	FALSE	FALSE	FALSE	FALSE	TRUE	FALSE	FALSE	TRUE	FALSE
Sf-Kf-Of_synthetic	SKO	3mer	2.55544	TRUE	TRUE	TRUE	FALSE	TRUE	FALSE	FALSE	FALSE	FALSE	FALSE	TRUE	FALSE	FALSE	TRUE	FALSE	FALSE	FALSE	FALSE	FALSE	FALSE
Er-Kr-Sr_synthetic	eks	3mer	2.55388	FALSE	TRUE	TRUE	TRUE	FALSE	TRUE	FALSE	FALSE	FALSE	FALSE	TRUE	FALSE	FALSE	FALSE	FALSE	TRUE	FALSE	FALSE	FALSE	FALSE
Er-Or-Kf_synthetic	eoK	3mer	2.54891	TRUE	FALSE	TRUE	TRUE	FALSE	FALSE	TRUE	FALSE	TRUE	FALSE	FALSE	FALSE	FALSE	FALSE	FALSE	TRUE	FALSE	FALSE	FALSE	FALSE
Or-Ef-Kf_synthetic	oEK	3mer	2.53778	TRUE	FALSE	TRUE	TRUE	FALSE	FALSE	TRUE	FALSE	FALSE	FALSE	FALSE	TRUE	TRUE	FALSE	FALSE	FALSE	FALSE	FALSE	FALSE	FALSE
Of-Er-Kr_synthetic	Oek	3mer	2.51609	TRUE	FALSE	TRUE	TRUE	FALSE	FALSE	TRUE	FALSE	FALSE	FALSE	FALSE	TRUE	TRUE	FALSE	FALSE	FALSE	FALSE	FALSE	FALSE	FALSE
Sr-Er-Kf_synthetic	seK	3mer	2.5148	FALSE	TRUE	TRUE	TRUE	FALSE	FALSE	TRUE	FALSE	FALSE	FALSE	FALSE	TRUE	FALSE	TRUE	FALSE	FALSE	FALSE	FALSE	FALSE	FALSE
Ef-Kf-Sr_synthetic	EKs	3mer	2.51242	FALSE	TRUE	TRUE	TRUE	FALSE	TRUE	FALSE	FALSE	FALSE	FALSE	TRUE	FALSE	FALSE	FALSE	FALSE	TRUE	FALSE	FALSE	FALSE	FALSE
Ef-Kr-Sr_synthetic	Eks	3mer	2.50534	FALSE	TRUE	TRUE	TRUE	FALSE	TRUE	FALSE	FALSE	FALSE	FALSE	TRUE	FALSE	FALSE	FALSE	FALSE	TRUE	FALSE	FALSE	FALSE	FALSE
Sf-Er-Kf_synthetic	SeK	3mer	2.48785	FALSE	TRUE	TRUE	TRUE	FALSE	FALSE	TRUE	FALSE	FALSE	FALSE	FALSE	TRUE	FALSE	TRUE	FALSE	FALSE	FALSE	FALSE	FALSE	FALSE
Er-Sf-Kr_synthetic	eSk	3mer	2.47549	FALSE	TRUE	TRUE	TRUE	FALSE	FALSE	TRUE	FALSE	FALSE	TRUE	FALSE	FALSE	FALSE	FALSE	FALSE	TRUE	FALSE	FALSE	FALSE	FALSE
Sf-Ef-Kr_synthetic	SEk	3mer	2.45159	FALSE	TRUE	TRUE	TRUE	FALSE	FALSE	TRUE	FALSE	FALSE	FALSE	FALSE	TRUE	FALSE	TRUE	FALSE	FALSE	FALSE	FALSE	FALSE	FALSE
Sr-Of-Ef_synthetic	sOE	3mer	2.43691	TRUE	TRUE	FALSE	TRUE	FALSE	FALSE	FALSE	TRUE	TRUE	FALSE	FALSE	FALSE	FALSE	TRUE	FALSE	FALSE	FALSE	FALSE	FALSE	FALSE
Sr-Or-Kr_synthetic	sok	3mer	2.41261	TRUE	TRUE	TRUE	FALSE	FALSE	FALSE	TRUE	FALSE	TRUE	FALSE	FALSE	FALSE	FALSE	TRUE	FALSE	FALSE	FALSE	FALSE	FALSE	FALSE
Sf-Ef-Kf_synthetic	SEK	3mer	2.37206	FALSE	TRUE	TRUE	TRUE	FALSE	FALSE	TRUE	FALSE	FALSE	FALSE	FALSE	TRUE	FALSE	TRUE	FALSE	FALSE	FALSE	FALSE	FALSE	FALSE
Ef-Or-Kf_synthetic	EoK	3mer	2.36947	TRUE	FALSE	TRUE	TRUE	FALSE	FALSE	TRUE	FALSE	TRUE	FALSE	FALSE	FALSE	FALSE	FALSE	FALSE	TRUE	FALSE	FALSE	FALSE	FALSE
Kf-Or-Sr_synthetic	Kos	3mer	2.36534	TRUE	TRUE	TRUE	FALSE	FALSE	TRUE	FALSE	FALSE	TRUE	FALSE	FALSE	FALSE	FALSE	FALSE	TRUE	FALSE	FALSE	FALSE	FALSE	FALSE
Kf-Sf-Or_synthetic	KSo	3mer	2.35483	TRUE	TRUE	TRUE	FALSE	TRUE	FALSE	FALSE	FALSE	FALSE	TRUE	FALSE	FALSE	FALSE	FALSE	TRUE	FALSE	FALSE	FALSE	FALSE	FALSE
Er-Sf-Kf_synthetic	eSK	3mer	2.34161	FALSE	TRUE	TRUE	TRUE	FALSE	FALSE	TRUE	FALSE	FALSE	TRUE	FALSE	FALSE	FALSE	FALSE	FALSE	TRUE	FALSE	FALSE	FALSE	FALSE
Kr-Ef-Sr_synthetic	kEs	3mer	2.34098	FALSE	TRUE	TRUE	TRUE	FALSE	TRUE	FALSE	FALSE	FALSE	FALSE	FALSE	TRUE	FALSE	FALSE	TRUE	FALSE	FALSE	FALSE	FALSE	FALSE
Er-Kr-Sf_synthetic	ekS	3mer	2.32999	FALSE	TRUE	TRUE	TRUE	FALSE	TRUE	FALSE	FALSE	FALSE	FALSE	TRUE	FALSE	FALSE	FALSE	FALSE	TRUE	FALSE	FALSE	FALSE	FALSE
Kf-Er-Sr_synthetic	Kes	3mer	2.31718	FALSE	TRUE	TRUE	TRUE	FALSE	TRUE	FALSE	FALSE	FALSE	FALSE	FALSE	TRUE	FALSE	FALSE	TRUE	FALSE	FALSE	FALSE	FALSE	FALSE
Ef-Sf-Kf_synthetic	ESK	3mer	2.2923	FALSE	TRUE	TRUE	TRUE	FALSE	FALSE	TRUE	FALSE	FALSE	TRUE	FALSE	FALSE	FALSE	FALSE	FALSE	TRUE	FALSE	FALSE	FALSE	FALSE
Kf-Er_synthetic	Ke	2mer	2.28821	FALSE	FALSE	TRUE	TRUE	FALSE	FALSE	FALSE	TRUE	FALSE	FALSE	TRUE	FALSE	FALSE	FALSE	FALSE	FALSE	FALSE	FALSE	FALSE	FALSE
Ef-Kr-Sf_synthetic	EkS	3mer	2.276	FALSE	TRUE	TRUE	TRUE	FALSE	TRUE	FALSE	FALSE	FALSE	FALSE	TRUE	FALSE	FALSE	FALSE	FALSE	TRUE	FALSE	FALSE	FALSE	FALSE
Or-Sf-Kf_synthetic	oSK	3mer	2.26467	TRUE	TRUE	TRUE	FALSE	FALSE	FALSE	TRUE	FALSE	FALSE	TRUE	FALSE	FALSE	TRUE	FALSE	FALSE	FALSE	FALSE	FALSE	FALSE	FALSE
Or-Er-Kf_synthetic	oeK	3mer	2.25397	TRUE	FALSE	TRUE	TRUE	FALSE	FALSE	TRUE	FALSE	FALSE	FALSE	FALSE	TRUE	TRUE	FALSE	FALSE	FALSE	FALSE	FALSE	FALSE	FALSE
Kr-Ef-Sf_synthetic	kES	3mer	2.22328	FALSE	TRUE	TRUE	TRUE	FALSE	TRUE	FALSE	FALSE	FALSE	FALSE	FALSE	TRUE	FALSE	FALSE	TRUE	FALSE	FALSE	FALSE	FALSE	FALSE
Sr-Kr-Or_synthetic	sko	3mer	2.21543	TRUE	TRUE	TRUE	FALSE	TRUE	FALSE	FALSE	FALSE	FALSE	FALSE	TRUE	FALSE	FALSE	TRUE	FALSE	FALSE	FALSE	FALSE	FALSE	FALSE
Kf-Ef-Sf_synthetic	KES	3mer	2.18413	FALSE	TRUE	TRUE	TRUE	FALSE	TRUE	FALSE	FALSE	FALSE	FALSE	FALSE	TRUE	FALSE	FALSE	TRUE	FALSE	FALSE	FALSE	FALSE	FALSE
Kr-Er-Sf_synthetic	keS	3mer	2.1521	FALSE	TRUE	TRUE	TRUE	FALSE	TRUE	FALSE	FALSE	FALSE	FALSE	FALSE	TRUE	FALSE	FALSE	TRUE	FALSE	FALSE	FALSE	FALSE	FALSE
Of-Er_synthetic	Oe	2mer	2.1467	TRUE	FALSE	FALSE	TRUE	FALSE	FALSE	FALSE	TRUE	TRUE	FALSE	FALSE	FALSE	FALSE	FALSE	FALSE	FALSE	FALSE	FALSE	FALSE	FALSE
Kr-Sf-Or_synthetic	kSo	3mer	2.14578	TRUE	TRUE	TRUE	FALSE	TRUE	FALSE	FALSE	FALSE	FALSE	TRUE	FALSE	FALSE	FALSE	FALSE	TRUE	FALSE	FALSE	FALSE	FALSE	FALSE
Kf-Ef-Sr_synthetic	KEs	3mer	2.1432	FALSE	TRUE	TRUE	TRUE	FALSE	TRUE	FALSE	FALSE	FALSE	FALSE	FALSE	TRUE	FALSE	FALSE	TRUE	FALSE	FALSE	FALSE	FALSE	FALSE
Kr-Sr-Or_synthetic	kso	3mer	2.14251	TRUE	TRUE	TRUE	FALSE	TRUE	FALSE	FALSE	FALSE	FALSE	TRUE	FALSE	FALSE	FALSE	FALSE	TRUE	FALSE	FALSE	FALSE	FALSE	FALSE
Sf-Or-Kr_synthetic	Sok	3mer	2.14167	TRUE	TRUE	TRUE	FALSE	FALSE	FALSE	TRUE	FALSE	TRUE	FALSE	FALSE	FALSE	FALSE	TRUE	FALSE	FALSE	FALSE	FALSE	FALSE	FALSE
Or-Sr-Er_synthetic	ose	3mer	2.11977	TRUE	TRUE	FALSE	TRUE	FALSE	FALSE	FALSE	TRUE	FALSE	TRUE	FALSE	FALSE	TRUE	FALSE	FALSE	FALSE	FALSE	FALSE	FALSE	FALSE
Sr-Kr_synthetic	sk	2mer	2.10975	FALSE	TRUE	TRUE	FALSE	FALSE	FALSE	TRUE	FALSE	FALSE	TRUE	FALSE	FALSE	FALSE	FALSE	FALSE	FALSE	FALSE	FALSE	FALSE	FALSE
Kr-Er-Of_synthetic	keO	3mer	2.08903	TRUE	FALSE	TRUE	TRUE	TRUE	FALSE	FALSE	FALSE	FALSE	FALSE	FALSE	TRUE	FALSE	FALSE	TRUE	FALSE	FALSE	FALSE	FALSE	FALSE
Er-Kf-Sf_synthetic	eKS	3mer	2.0861	FALSE	TRUE	TRUE	TRUE	FALSE	TRUE	FALSE	FALSE	FALSE	FALSE	TRUE	FALSE	FALSE	FALSE	FALSE	TRUE	FALSE	FALSE	FALSE	FALSE
Of-Sr-Kr_synthetic	Osk	3mer	2.07418	TRUE	TRUE	TRUE	FALSE	FALSE	FALSE	TRUE	FALSE	FALSE	TRUE	FALSE	FALSE	TRUE	FALSE	FALSE	FALSE	FALSE	FALSE	FALSE	FALSE
Ef-Kf-Of_synthetic	EKO	3mer	2.06283	TRUE	FALSE	TRUE	TRUE	TRUE	FALSE	FALSE	FALSE	FALSE	FALSE	TRUE	FALSE	FALSE	FALSE	FALSE	TRUE	FALSE	FALSE	FALSE	FALSE
Er-Kf-Of_synthetic	eKO	3mer	2.04182	TRUE	FALSE	TRUE	TRUE	TRUE	FALSE	FALSE	FALSE	FALSE	FALSE	TRUE	FALSE	FALSE	FALSE	FALSE	TRUE	FALSE	FALSE	FALSE	FALSE
Sf-Of-Ef_synthetic	SOE	3mer	2.02771	TRUE	TRUE	FALSE	TRUE	FALSE	FALSE	FALSE	TRUE	TRUE	FALSE	FALSE	FALSE	FALSE	TRUE	FALSE	FALSE	FALSE	FALSE	FALSE	FALSE
Kr-Or-Sr_synthetic	kos	3mer	2.02667	TRUE	TRUE	TRUE	FALSE	FALSE	TRUE	FALSE	FALSE	TRUE	FALSE	FALSE	FALSE	FALSE	FALSE	TRUE	FALSE	FALSE	FALSE	FALSE	FALSE
Ef-Kf-Sf_synthetic	EKS	3mer	2.01226	FALSE	TRUE	TRUE	TRUE	FALSE	TRUE	FALSE	FALSE	FALSE	FALSE	TRUE	FALSE	FALSE	FALSE	FALSE	TRUE	FALSE	FALSE	FALSE	FALSE
Sr-Of-Er_synthetic	sOe	3mer	2.00813	TRUE	TRUE	FALSE	TRUE	FALSE	FALSE	FALSE	TRUE	TRUE	FALSE	FALSE	FALSE	FALSE	TRUE	FALSE	FALSE	FALSE	FALSE	FALSE	FALSE
Or-Kf-Sf_synthetic	oKS	3mer	2.00465	TRUE	TRUE	TRUE	FALSE	FALSE	TRUE	FALSE	FALSE	FALSE	FALSE	TRUE	FALSE	TRUE	FALSE	FALSE	FALSE	FALSE	FALSE	FALSE	FALSE
Of-Kr-Sr_synthetic	Oks	3mer	1.99885	TRUE	TRUE	TRUE	FALSE	FALSE	TRUE	FALSE	FALSE	FALSE	FALSE	TRUE	FALSE	TRUE	FALSE	FALSE	FALSE	FALSE	FALSE	FALSE	FALSE
Sf-Of-Er_synthetic	SOe	3mer	1.99466	TRUE	TRUE	FALSE	TRUE	FALSE	FALSE	FALSE	TRUE	TRUE	FALSE	FALSE	FALSE	FALSE	TRUE	FALSE	FALSE	FALSE	FALSE	FALSE	FALSE
Ef-Kf_synthetic	EK	2mer	1.9897	FALSE	FALSE	TRUE	TRUE	FALSE	FALSE	TRUE	FALSE	FALSE	FALSE	FALSE	TRUE	FALSE	FALSE	FALSE	FALSE	FALSE	FALSE	FALSE	FALSE
Or-Sf-Er_synthetic	oSe	3mer	1.9717	TRUE	TRUE	FALSE	TRUE	FALSE	FALSE	FALSE	TRUE	FALSE	TRUE	FALSE	FALSE	TRUE	FALSE	FALSE	FALSE	FALSE	FALSE	FALSE	FALSE
Kf-Sr-Or_synthetic	Kso	3mer	1.95634	TRUE	TRUE	TRUE	FALSE	TRUE	FALSE	FALSE	FALSE	FALSE	TRUE	FALSE	FALSE	FALSE	FALSE	TRUE	FALSE	FALSE	FALSE	FALSE	FALSE
Kf-Ef-Of_synthetic	KEO	3mer	1.94902	TRUE	FALSE	TRUE	TRUE	TRUE	FALSE	FALSE	FALSE	FALSE	FALSE	FALSE	TRUE	FALSE	FALSE	TRUE	FALSE	FALSE	FALSE	FALSE	FALSE
Of-Ef-Kr_synthetic	OEk	3mer	1.92453	TRUE	FALSE	TRUE	TRUE	FALSE	FALSE	TRUE	FALSE	FALSE	FALSE	FALSE	TRUE	TRUE	FALSE	FALSE	FALSE	FALSE	FALSE	FALSE	FALSE
Kf-Er-Of_synthetic	KeO	3mer	1.90013	TRUE	FALSE	TRUE	TRUE	TRUE	FALSE	FALSE	FALSE	FALSE	FALSE	FALSE	TRUE	FALSE	FALSE	TRUE	FALSE	FALSE	FALSE	FALSE	FALSE
Kr-Sr-Of_synthetic	ksO	3mer	1.87245	TRUE	TRUE	TRUE	FALSE	TRUE	FALSE	FALSE	FALSE	FALSE	TRUE	FALSE	FALSE	FALSE	FALSE	TRUE	FALSE	FALSE	FALSE	FALSE	FALSE
Of-Kf-Sr_synthetic	OKs	3mer	1.87091	TRUE	TRUE	TRUE	FALSE	FALSE	TRUE	FALSE	FALSE	FALSE	FALSE	TRUE	FALSE	TRUE	FALSE	FALSE	FALSE	FALSE	FALSE	FALSE	FALSE
Kr-Ef-Of_synthetic	kEO	3mer	1.86498	TRUE	FALSE	TRUE	TRUE	TRUE	FALSE	FALSE	FALSE	FALSE	FALSE	FALSE	TRUE	FALSE	FALSE	TRUE	FALSE	FALSE	FALSE	FALSE	FALSE
Kr-Ef_synthetic	kE	2mer	1.86119	FALSE	FALSE	TRUE	TRUE	FALSE	FALSE	FALSE	TRUE	FALSE	FALSE	TRUE	FALSE	FALSE	FALSE	FALSE	FALSE	FALSE	FALSE	FALSE	FALSE
Of-Er-Kf_synthetic	OeK	3mer	1.84742	TRUE	FALSE	TRUE	TRUE	FALSE	FALSE	TRUE	FALSE	FALSE	FALSE	FALSE	TRUE	TRUE	FALSE	FALSE	FALSE	FALSE	FALSE	FALSE	FALSE
Sf-Or-Kf_synthetic	SoK	3mer	1.84232	TRUE	TRUE	TRUE	FALSE	FALSE	FALSE	TRUE	FALSE	TRUE	FALSE	FALSE	FALSE	FALSE	TRUE	FALSE	FALSE	FALSE	FALSE	FALSE	FALSE
Of-Kf-Sf_synthetic	OKS	3mer	1.82913	TRUE	TRUE	TRUE	FALSE	FALSE	TRUE	FALSE	FALSE	FALSE	FALSE	TRUE	FALSE	TRUE	FALSE	FALSE	FALSE	FALSE	FALSE	FALSE	FALSE
Or-Sf-Ef_synthetic	oSE	3mer	1.81484	TRUE	TRUE	FALSE	TRUE	FALSE	FALSE	FALSE	TRUE	FALSE	TRUE	FALSE	FALSE	TRUE	FALSE	FALSE	FALSE	FALSE	FALSE	FALSE	FALSE
Kr-Sf-Of_synthetic	kSO	3mer	1.81376	TRUE	TRUE	TRUE	FALSE	TRUE	FALSE	FALSE	FALSE	FALSE	TRUE	FALSE	FALSE	FALSE	FALSE	TRUE	FALSE	FALSE	FALSE	FALSE	FALSE
Of-Ef-Kf_synthetic	OEK	3mer	1.80429	TRUE	FALSE	TRUE	TRUE	FALSE	FALSE	TRUE	FALSE	FALSE	FALSE	FALSE	TRUE	TRUE	FALSE	FALSE	FALSE	FALSE	FALSE	FALSE	FALSE
Of-Sr-Kf_synthetic	OsK	3mer	1.79207	TRUE	TRUE	TRUE	FALSE	FALSE	FALSE	TRUE	FALSE	FALSE	TRUE	FALSE	FALSE	TRUE	FALSE	FALSE	FALSE	FALSE	FALSE	FALSE	FALSE
Ef-Kr-Of_synthetic	EkO	3mer	1.77979	TRUE	FALSE	TRUE	TRUE	TRUE	FALSE	FALSE	FALSE	FALSE	FALSE	TRUE	FALSE	FALSE	FALSE	FALSE	TRUE	FALSE	FALSE	FALSE	FALSE
Kr-Of-Sr_synthetic	kOs	3mer	1.76936	TRUE	TRUE	TRUE	FALSE	FALSE	TRUE	FALSE	FALSE	TRUE	FALSE	FALSE	FALSE	FALSE	FALSE	TRUE	FALSE	FALSE	FALSE	FALSE	FALSE
Or-Sr-Ef_synthetic	osE	3mer	1.76933	TRUE	TRUE	FALSE	TRUE	FALSE	FALSE	FALSE	TRUE	FALSE	TRUE	FALSE	FALSE	TRUE	FALSE	FALSE	FALSE	FALSE	FALSE	FALSE	FALSE
Of-Sf-Kr_synthetic	OSk	3mer	1.74286	TRUE	TRUE	TRUE	FALSE	FALSE	FALSE	TRUE	FALSE	FALSE	TRUE	FALSE	FALSE	TRUE	FALSE	FALSE	FALSE	FALSE	FALSE	FALSE	FALSE
Kf-Or-Sf_synthetic	KoS	3mer	1.72604	TRUE	TRUE	TRUE	FALSE	FALSE	TRUE	FALSE	FALSE	TRUE	FALSE	FALSE	FALSE	FALSE	FALSE	TRUE	FALSE	FALSE	FALSE	FALSE	FALSE
Of-Kr-Sf_synthetic	OkS	3mer	1.71492	TRUE	TRUE	TRUE	FALSE	FALSE	TRUE	FALSE	FALSE	FALSE	FALSE	TRUE	FALSE	TRUE	FALSE	FALSE	FALSE	FALSE	FALSE	FALSE	FALSE
Or-Er_synthetic	oe	2mer	1.66701	TRUE	FALSE	FALSE	TRUE	FALSE	FALSE	FALSE	TRUE	TRUE	FALSE	FALSE	FALSE	FALSE	FALSE	FALSE	FALSE	FALSE	FALSE	FALSE	FALSE
Kf-Of-Sr_synthetic	KOs	3mer	1.65179	TRUE	TRUE	TRUE	FALSE	FALSE	TRUE	FALSE	FALSE	TRUE	FALSE	FALSE	FALSE	FALSE	FALSE	TRUE	FALSE	FALSE	FALSE	FALSE	FALSE
Kf-Or_synthetic	Ko	2mer	1.63621	TRUE	FALSE	TRUE	FALSE	TRUE	FALSE	FALSE	FALSE	FALSE	FALSE	TRUE	FALSE	FALSE	FALSE	FALSE	FALSE	FALSE	FALSE	FALSE	FALSE
Kr-Or-Sf_synthetic	koS	3mer	1.63111	TRUE	TRUE	TRUE	FALSE	FALSE	TRUE	FALSE	FALSE	TRUE	FALSE	FALSE	FALSE	FALSE	FALSE	TRUE	FALSE	FALSE	FALSE	FALSE	FALSE
Sf-Ef-Of_synthetic	SEO	3mer	1.62085	TRUE	TRUE	FALSE	TRUE	TRUE	FALSE	FALSE	FALSE	FALSE	FALSE	FALSE	TRUE	FALSE	TRUE	FALSE	FALSE	FALSE	FALSE	FALSE	FALSE
Kf-Sf-Of_synthetic	KSO	3mer	1.6123	TRUE	TRUE	TRUE	FALSE	TRUE	FALSE	FALSE	FALSE	FALSE	TRUE	FALSE	FALSE	FALSE	FALSE	TRUE	FALSE	FALSE	FALSE	FALSE	FALSE
Sf-Or-Ef_synthetic	SoE	3mer	1.61228	TRUE	TRUE	FALSE	TRUE	FALSE	FALSE	FALSE	TRUE	TRUE	FALSE	FALSE	FALSE	FALSE	TRUE	FALSE	FALSE	FALSE	FALSE	FALSE	FALSE
Or-Kf_synthetic	oK	2mer	1.60972	TRUE	FALSE	TRUE	FALSE	FALSE	FALSE	TRUE	FALSE	TRUE	FALSE	FALSE	FALSE	FALSE	FALSE	FALSE	FALSE	FALSE	FALSE	FALSE	FALSE
Of-Ef-Sr_synthetic	OEs	3mer	1.60956	TRUE	TRUE	FALSE	TRUE	FALSE	TRUE	FALSE	FALSE	FALSE	FALSE	FALSE	TRUE	TRUE	FALSE	FALSE	FALSE	FALSE	FALSE	FALSE	FALSE
Kr-Or_synthetic	ko	2mer	1.60695	TRUE	FALSE	TRUE	FALSE	TRUE	FALSE	FALSE	FALSE	FALSE	FALSE	TRUE	FALSE	FALSE	FALSE	FALSE	FALSE	FALSE	FALSE	FALSE	FALSE
Kf-Ef_synthetic	KE	2mer	1.59903	FALSE	FALSE	TRUE	TRUE	FALSE	FALSE	FALSE	TRUE	FALSE	FALSE	TRUE	FALSE	FALSE	FALSE	FALSE	FALSE	FALSE	FALSE	FALSE	FALSE
Ef-Kr_synthetic	Ek	2mer	1.59853	FALSE	FALSE	TRUE	TRUE	FALSE	FALSE	TRUE	FALSE	FALSE	FALSE	FALSE	TRUE	FALSE	FALSE	FALSE	FALSE	FALSE	FALSE	FALSE	FALSE
Ef-Of-Sr_synthetic	EOs	3mer	1.58838	TRUE	TRUE	FALSE	TRUE	FALSE	TRUE	FALSE	FALSE	TRUE	FALSE	FALSE	FALSE	FALSE	FALSE	FALSE	TRUE	FALSE	FALSE	FALSE	FALSE
Ef-Or_synthetic	Eo	2mer	1.58361	TRUE	FALSE	FALSE	TRUE	TRUE	FALSE	FALSE	FALSE	FALSE	FALSE	FALSE	TRUE	FALSE	FALSE	FALSE	FALSE	FALSE	FALSE	FALSE	FALSE
Kr-Er_synthetic	ke	2mer	1.58214	FALSE	FALSE	TRUE	TRUE	FALSE	FALSE	FALSE	TRUE	FALSE	FALSE	TRUE	FALSE	FALSE	FALSE	FALSE	FALSE	FALSE	FALSE	FALSE	FALSE
Sr-Ef_synthetic	sE	2mer	1.57558	FALSE	TRUE	FALSE	TRUE	FALSE	FALSE	FALSE	TRUE	FALSE	TRUE	FALSE	FALSE	FALSE	FALSE	FALSE	FALSE	FALSE	FALSE	FALSE	FALSE
Sf-Or-Er_synthetic	Soe	3mer	1.53054	TRUE	TRUE	FALSE	TRUE	FALSE	FALSE	FALSE	TRUE	TRUE	FALSE	FALSE	FALSE	FALSE	TRUE	FALSE	FALSE	FALSE	FALSE	FALSE	FALSE
Er-Kr_synthetic	ek	2mer	1.51393	FALSE	FALSE	TRUE	TRUE	FALSE	FALSE	TRUE	FALSE	FALSE	FALSE	FALSE	TRUE	FALSE	FALSE	FALSE	FALSE	FALSE	FALSE	FALSE	FALSE
Or-Ef-Sr_synthetic	oEs	3mer	1.51239	TRUE	TRUE	FALSE	TRUE	FALSE	TRUE	FALSE	FALSE	FALSE	FALSE	FALSE	TRUE	TRUE	FALSE	FALSE	FALSE	FALSE	FALSE	FALSE	FALSE
Sr-Or-Ef_synthetic	soE	3mer	1.50706	TRUE	TRUE	FALSE	TRUE	FALSE	FALSE	FALSE	TRUE	TRUE	FALSE	FALSE	FALSE	FALSE	TRUE	FALSE	FALSE	FALSE	FALSE	FALSE	FALSE
Or-Er-Sf_synthetic	oeS	3mer	1.50305	TRUE	TRUE	FALSE	TRUE	FALSE	TRUE	FALSE	FALSE	FALSE	FALSE	FALSE	TRUE	TRUE	FALSE	FALSE	FALSE	FALSE	FALSE	FALSE	FALSE
Er-Kf_synthetic	eK	2mer	1.50075	FALSE	FALSE	TRUE	TRUE	FALSE	FALSE	TRUE	FALSE	FALSE	FALSE	FALSE	TRUE	FALSE	FALSE	FALSE	FALSE	FALSE	FALSE	FALSE	FALSE
Of-Kr_synthetic	Ok	2mer	1.48131	TRUE	FALSE	TRUE	FALSE	FALSE	FALSE	TRUE	FALSE	TRUE	FALSE	FALSE	FALSE	FALSE	FALSE	FALSE	FALSE	FALSE	FALSE	FALSE	FALSE
Sr-Er-Of_synthetic	seO	3mer	1.45913	TRUE	TRUE	FALSE	TRUE	TRUE	FALSE	FALSE	FALSE	FALSE	FALSE	FALSE	TRUE	FALSE	TRUE	FALSE	FALSE	FALSE	FALSE	FALSE	FALSE
Or-Er-Sr_synthetic	oes	3mer	1.45389	TRUE	TRUE	FALSE	TRUE	FALSE	TRUE	FALSE	FALSE	FALSE	FALSE	FALSE	TRUE	TRUE	FALSE	FALSE	FALSE	FALSE	FALSE	FALSE	FALSE
Ef-Of-Sf_synthetic	EOS	3mer	1.45186	TRUE	TRUE	FALSE	TRUE	FALSE	TRUE	FALSE	FALSE	TRUE	FALSE	FALSE	FALSE	FALSE	FALSE	FALSE	TRUE	FALSE	FALSE	FALSE	FALSE
Sf-Kr_synthetic	Sk	2mer	1.44952	FALSE	TRUE	TRUE	FALSE	FALSE	FALSE	TRUE	FALSE	FALSE	TRUE	FALSE	FALSE	FALSE	FALSE	FALSE	FALSE	FALSE	FALSE	FALSE	FALSE
Sr-Er-Or_synthetic	seo	3mer	1.44432	TRUE	TRUE	FALSE	TRUE	TRUE	FALSE	FALSE	FALSE	FALSE	FALSE	FALSE	TRUE	FALSE	TRUE	FALSE	FALSE	FALSE	FALSE	FALSE	FALSE
Sr-Or-Er_synthetic	soe	3mer	1.43812	TRUE	TRUE	FALSE	TRUE	FALSE	FALSE	FALSE	TRUE	TRUE	FALSE	FALSE	FALSE	FALSE	TRUE	FALSE	FALSE	FALSE	FALSE	FALSE	FALSE
Ef-Sf-Of_synthetic	ESO	3mer	1.43359	TRUE	TRUE	FALSE	TRUE	TRUE	FALSE	FALSE	FALSE	FALSE	TRUE	FALSE	FALSE	FALSE	FALSE	FALSE	TRUE	FALSE	FALSE	FALSE	FALSE
Ef-Sr-Of_synthetic	EsO	3mer	1.42774	TRUE	TRUE	FALSE	TRUE	TRUE	FALSE	FALSE	FALSE	FALSE	TRUE	FALSE	FALSE	FALSE	FALSE	FALSE	TRUE	FALSE	FALSE	FALSE	FALSE
Of-Sf-Kf_synthetic	OSK	3mer	1.41576	TRUE	TRUE	TRUE	FALSE	FALSE	FALSE	TRUE	FALSE	FALSE	TRUE	FALSE	FALSE	TRUE	FALSE	FALSE	FALSE	FALSE	FALSE	FALSE	FALSE
Kr-Sr_synthetic	ks	2mer	1.41155	FALSE	TRUE	TRUE	FALSE	FALSE	TRUE	FALSE	FALSE	FALSE	FALSE	TRUE	FALSE	FALSE	FALSE	FALSE	FALSE	FALSE	FALSE	FALSE	FALSE
Sr-Ef-Or_synthetic	sEo	3mer	1.39485	TRUE	TRUE	FALSE	TRUE	TRUE	FALSE	FALSE	FALSE	FALSE	FALSE	FALSE	TRUE	FALSE	TRUE	FALSE	FALSE	FALSE	FALSE	FALSE	FALSE
Sr-Kf_synthetic	sK	2mer	1.36811	FALSE	TRUE	TRUE	FALSE	FALSE	FALSE	TRUE	FALSE	FALSE	TRUE	FALSE	FALSE	FALSE	FALSE	FALSE	FALSE	FALSE	FALSE	FALSE	FALSE
Of-Sr-Ef_synthetic	OsE	3mer	1.36045	TRUE	TRUE	FALSE	TRUE	FALSE	FALSE	FALSE	TRUE	FALSE	TRUE	FALSE	FALSE	TRUE	FALSE	FALSE	FALSE	FALSE	FALSE	FALSE	FALSE
Kf-Sr_synthetic	Ks	2mer	1.3438	FALSE	TRUE	TRUE	FALSE	FALSE	TRUE	FALSE	FALSE	FALSE	FALSE	TRUE	FALSE	FALSE	FALSE	FALSE	FALSE	FALSE	FALSE	FALSE	FALSE
Kr-Of-Sf_synthetic	kOS	3mer	1.34269	TRUE	TRUE	TRUE	FALSE	FALSE	TRUE	FALSE	FALSE	TRUE	FALSE	FALSE	FALSE	FALSE	FALSE	TRUE	FALSE	FALSE	FALSE	FALSE	FALSE
Sr-Ef-Of_synthetic	sEO	3mer	1.33735	TRUE	TRUE	FALSE	TRUE	TRUE	FALSE	FALSE	FALSE	FALSE	FALSE	FALSE	TRUE	FALSE	TRUE	FALSE	FALSE	FALSE	FALSE	FALSE	FALSE
Sf-Ef-Or_synthetic	SEo	3mer	1.3331	TRUE	TRUE	FALSE	TRUE	TRUE	FALSE	FALSE	FALSE	FALSE	FALSE	FALSE	TRUE	FALSE	TRUE	FALSE	FALSE	FALSE	FALSE	FALSE	FALSE
Kr-Of_synthetic	kO	2mer	1.32529	TRUE	FALSE	TRUE	FALSE	TRUE	FALSE	FALSE	FALSE	FALSE	FALSE	TRUE	FALSE	FALSE	FALSE	FALSE	FALSE	FALSE	FALSE	FALSE	FALSE
Er-Sr-Or_synthetic	eso	3mer	1.30677	TRUE	TRUE	FALSE	TRUE	TRUE	FALSE	FALSE	FALSE	FALSE	TRUE	FALSE	FALSE	FALSE	FALSE	FALSE	TRUE	FALSE	FALSE	FALSE	FALSE
Sf-Er-Or_synthetic	Seo	3mer	1.30226	TRUE	TRUE	FALSE	TRUE	TRUE	FALSE	FALSE	FALSE	FALSE	FALSE	FALSE	TRUE	FALSE	TRUE	FALSE	FALSE	FALSE	FALSE	FALSE	FALSE
Ef-Or-Sr_synthetic	Eos	3mer	1.30015	TRUE	TRUE	FALSE	TRUE	FALSE	TRUE	FALSE	FALSE	TRUE	FALSE	FALSE	FALSE	FALSE	FALSE	FALSE	TRUE	FALSE	FALSE	FALSE	FALSE
Ef-Sr-Or_synthetic	Eso	3mer	1.29973	TRUE	TRUE	FALSE	TRUE	TRUE	FALSE	FALSE	FALSE	FALSE	TRUE	FALSE	FALSE	FALSE	FALSE	FALSE	TRUE	FALSE	FALSE	FALSE	FALSE
Of-Sr-Er_synthetic	Ose	3mer	1.29551	TRUE	TRUE	FALSE	TRUE	FALSE	FALSE	FALSE	TRUE	FALSE	TRUE	FALSE	FALSE	TRUE	FALSE	FALSE	FALSE	FALSE	FALSE	FALSE	FALSE
Kr-Sf_synthetic	kS	2mer	1.29081	FALSE	TRUE	TRUE	FALSE	FALSE	TRUE	FALSE	FALSE	FALSE	FALSE	TRUE	FALSE	FALSE	FALSE	FALSE	FALSE	FALSE	FALSE	FALSE	FALSE
Kf-Of-Sf_synthetic	KOS	3mer	1.28848	TRUE	TRUE	TRUE	FALSE	FALSE	TRUE	FALSE	FALSE	TRUE	FALSE	FALSE	FALSE	FALSE	FALSE	TRUE	FALSE	FALSE	FALSE	FALSE	FALSE
Of-Kf_synthetic	OK	2mer	1.28796	TRUE	FALSE	TRUE	FALSE	FALSE	FALSE	TRUE	FALSE	TRUE	FALSE	FALSE	FALSE	FALSE	FALSE	FALSE	FALSE	FALSE	FALSE	FALSE	FALSE
Or-Ef-Sf_synthetic	oES	3mer	1.28723	TRUE	TRUE	FALSE	TRUE	FALSE	TRUE	FALSE	FALSE	FALSE	FALSE	FALSE	TRUE	TRUE	FALSE	FALSE	FALSE	FALSE	FALSE	FALSE	FALSE
Ef-Sf-Or_synthetic	ESo	3mer	1.28499	TRUE	TRUE	FALSE	TRUE	TRUE	FALSE	FALSE	FALSE	FALSE	TRUE	FALSE	FALSE	FALSE	FALSE	FALSE	TRUE	FALSE	FALSE	FALSE	FALSE
Er-Or-Sr_synthetic	eos	3mer	1.27635	TRUE	TRUE	FALSE	TRUE	FALSE	TRUE	FALSE	FALSE	TRUE	FALSE	FALSE	FALSE	FALSE	FALSE	FALSE	TRUE	FALSE	FALSE	FALSE	FALSE
Er-Sf-Or_synthetic	eSo	3mer	1.26962	TRUE	TRUE	FALSE	TRUE	TRUE	FALSE	FALSE	FALSE	FALSE	TRUE	FALSE	FALSE	FALSE	FALSE	FALSE	TRUE	FALSE	FALSE	FALSE	FALSE
Ef-Or-Sf_synthetic	EoS	3mer	1.25675	TRUE	TRUE	FALSE	TRUE	FALSE	TRUE	FALSE	FALSE	TRUE	FALSE	FALSE	FALSE	FALSE	FALSE	FALSE	TRUE	FALSE	FALSE	FALSE	FALSE
Er-Sr-Of_synthetic	esO	3mer	1.25319	TRUE	TRUE	FALSE	TRUE	TRUE	FALSE	FALSE	FALSE	FALSE	TRUE	FALSE	FALSE	FALSE	FALSE	FALSE	TRUE	FALSE	FALSE	FALSE	FALSE
Sf-Ef_synthetic	SE	2mer	1.2472	FALSE	TRUE	FALSE	TRUE	FALSE	FALSE	FALSE	TRUE	FALSE	TRUE	FALSE	FALSE	FALSE	FALSE	FALSE	FALSE	FALSE	FALSE	FALSE	FALSE
Of-Sf-Er_synthetic	OSe	3mer	1.23265	TRUE	TRUE	FALSE	TRUE	FALSE	FALSE	FALSE	TRUE	FALSE	TRUE	FALSE	FALSE	TRUE	FALSE	FALSE	FALSE	FALSE	FALSE	FALSE	FALSE
Sf-Er-Of_synthetic	SeO	3mer	1.20784	TRUE	TRUE	FALSE	TRUE	TRUE	FALSE	FALSE	FALSE	FALSE	FALSE	FALSE	TRUE	FALSE	TRUE	FALSE	FALSE	FALSE	FALSE	FALSE	FALSE
Kf-Of_synthetic	KO	2mer	1.20537	TRUE	FALSE	TRUE	FALSE	TRUE	FALSE	FALSE	FALSE	FALSE	FALSE	TRUE	FALSE	FALSE	FALSE	FALSE	FALSE	FALSE	FALSE	FALSE	FALSE
Er-Or-Sf_synthetic	eoS	3mer	1.19556	TRUE	TRUE	FALSE	TRUE	FALSE	TRUE	FALSE	FALSE	TRUE	FALSE	FALSE	FALSE	FALSE	FALSE	FALSE	TRUE	FALSE	FALSE	FALSE	FALSE
Kf-Sf_synthetic	KS	2mer	1.16151	FALSE	TRUE	TRUE	FALSE	FALSE	TRUE	FALSE	FALSE	FALSE	FALSE	TRUE	FALSE	FALSE	FALSE	FALSE	FALSE	FALSE	FALSE	FALSE	FALSE
Of-Ef-Sf_synthetic	OES	3mer	1.14914	TRUE	TRUE	FALSE	TRUE	FALSE	TRUE	FALSE	FALSE	FALSE	FALSE	FALSE	TRUE	TRUE	FALSE	FALSE	FALSE	FALSE	FALSE	FALSE	FALSE
Of-Er-Sr_synthetic	Oes	3mer	1.14744	TRUE	TRUE	FALSE	TRUE	FALSE	TRUE	FALSE	FALSE	FALSE	FALSE	FALSE	TRUE	TRUE	FALSE	FALSE	FALSE	FALSE	FALSE	FALSE	FALSE
Er-Of-Sf_synthetic	eOS	3mer	1.14099	TRUE	TRUE	FALSE	TRUE	FALSE	TRUE	FALSE	FALSE	TRUE	FALSE	FALSE	FALSE	FALSE	FALSE	FALSE	TRUE	FALSE	FALSE	FALSE	FALSE
Of-Sf-Ef_synthetic	OSE	3mer	1.1346	TRUE	TRUE	FALSE	TRUE	FALSE	FALSE	FALSE	TRUE	FALSE	TRUE	FALSE	FALSE	TRUE	FALSE	FALSE	FALSE	FALSE	FALSE	FALSE	FALSE
Or-Ef_synthetic	oE	2mer	1.13212	TRUE	FALSE	FALSE	TRUE	FALSE	FALSE	FALSE	TRUE	TRUE	FALSE	FALSE	FALSE	FALSE	FALSE	FALSE	FALSE	FALSE	FALSE	FALSE	FALSE
Sf-Kf_synthetic	SK	2mer	1.13151	FALSE	TRUE	TRUE	FALSE	FALSE	FALSE	TRUE	FALSE	FALSE	TRUE	FALSE	FALSE	FALSE	FALSE	FALSE	FALSE	FALSE	FALSE	FALSE	FALSE
Sr-Er_synthetic	se	2mer	1.1247	FALSE	TRUE	FALSE	TRUE	FALSE	FALSE	FALSE	TRUE	FALSE	TRUE	FALSE	FALSE	FALSE	FALSE	FALSE	FALSE	FALSE	FALSE	FALSE	FALSE
Of-Er-Sf_synthetic	OeS	3mer	1.1236	TRUE	TRUE	FALSE	TRUE	FALSE	TRUE	FALSE	FALSE	FALSE	FALSE	FALSE	TRUE	TRUE	FALSE	FALSE	FALSE	FALSE	FALSE	FALSE	FALSE
Er-Sf-Of_synthetic	eSO	3mer	1.11219	TRUE	TRUE	FALSE	TRUE	TRUE	FALSE	FALSE	FALSE	FALSE	TRUE	FALSE	FALSE	FALSE	FALSE	FALSE	TRUE	FALSE	FALSE	FALSE	FALSE
Ef-Of_synthetic	EO	2mer	1.10429	TRUE	FALSE	FALSE	TRUE	TRUE	FALSE	FALSE	FALSE	FALSE	FALSE	FALSE	TRUE	FALSE	FALSE	FALSE	FALSE	FALSE	FALSE	FALSE	FALSE
Er-Of-Sr_synthetic	eOs	3mer	1.09735	TRUE	TRUE	FALSE	TRUE	FALSE	TRUE	FALSE	FALSE	TRUE	FALSE	FALSE	FALSE	FALSE	FALSE	FALSE	TRUE	FALSE	FALSE	FALSE	FALSE
Er-Sr_synthetic	es	2mer	1.07386	FALSE	TRUE	FALSE	TRUE	FALSE	TRUE	FALSE	FALSE	FALSE	FALSE	FALSE	TRUE	FALSE	FALSE	FALSE	FALSE	FALSE	FALSE	FALSE	FALSE
Of-Ef_synthetic	OE	2mer	1.05403	TRUE	FALSE	FALSE	TRUE	FALSE	FALSE	FALSE	TRUE	TRUE	FALSE	FALSE	FALSE	FALSE	FALSE	FALSE	FALSE	FALSE	FALSE	FALSE	FALSE
Sf-Er_synthetic	Se	2mer	1.02651	FALSE	TRUE	FALSE	TRUE	FALSE	FALSE	FALSE	TRUE	FALSE	TRUE	FALSE	FALSE	FALSE	FALSE	FALSE	FALSE	FALSE	FALSE	FALSE	FALSE
Ef-Sr_synthetic	Es	2mer	1.0195	FALSE	TRUE	FALSE	TRUE	FALSE	TRUE	FALSE	FALSE	FALSE	FALSE	FALSE	TRUE	FALSE	FALSE	FALSE	FALSE	FALSE	FALSE	FALSE	FALSE
Er-Or_synthetic	eo	2mer	1.00805	TRUE	FALSE	FALSE	TRUE	TRUE	FALSE	FALSE	FALSE	FALSE	FALSE	FALSE	TRUE	FALSE	FALSE	FALSE	FALSE	FALSE	FALSE	FALSE	FALSE
Er-Sf_synthetic	eS	2mer	1.00311	FALSE	TRUE	FALSE	TRUE	FALSE	TRUE	FALSE	FALSE	FALSE	FALSE	FALSE	TRUE	FALSE	FALSE	FALSE	FALSE	FALSE	FALSE	FALSE	FALSE
Sf-Of_synthetic	SO	2mer	0.994324	TRUE	TRUE	FALSE	FALSE	TRUE	FALSE	FALSE	FALSE	FALSE	TRUE	FALSE	FALSE	FALSE	FALSE	FALSE	FALSE	FALSE	FALSE	FALSE	FALSE
Sr-Of_synthetic	sO	2mer	0.983792	TRUE	TRUE	FALSE	FALSE	TRUE	FALSE	FALSE	FALSE	FALSE	TRUE	FALSE	FALSE	FALSE	FALSE	FALSE	FALSE	FALSE	FALSE	FALSE	FALSE
Or-Sr_synthetic	os	2mer	0.978475	TRUE	TRUE	FALSE	FALSE	FALSE	TRUE	FALSE	FALSE	TRUE	FALSE	FALSE	FALSE	FALSE	FALSE	FALSE	FALSE	FALSE	FALSE	FALSE	FALSE
Ef-Sf_synthetic	ES	2mer	0.967271	FALSE	TRUE	FALSE	TRUE	FALSE	TRUE	FALSE	FALSE	FALSE	FALSE	FALSE	TRUE	FALSE	FALSE	FALSE	FALSE	FALSE	FALSE	FALSE	FALSE
Sr-Or_synthetic	so	2mer	0.912319	TRUE	TRUE	FALSE	FALSE	TRUE	FALSE	FALSE	FALSE	FALSE	TRUE	FALSE	FALSE	FALSE	FALSE	FALSE	FALSE	FALSE	FALSE	FALSE	FALSE
Or-Sf_synthetic	oS	2mer	0.900567	TRUE	TRUE	FALSE	FALSE	FALSE	TRUE	FALSE	FALSE	TRUE	FALSE	FALSE	FALSE	FALSE	FALSE	FALSE	FALSE	FALSE	FALSE	FALSE	FALSE
Or-Kr_synthetic	ok	2mer	0.89378	TRUE	FALSE	TRUE	FALSE	FALSE	FALSE	TRUE	FALSE	TRUE	FALSE	FALSE	FALSE	FALSE	FALSE	FALSE	FALSE	FALSE	FALSE	FALSE	FALSE
Er-Of_synthetic	eO	2mer	0.892206	TRUE	FALSE	FALSE	TRUE	TRUE	FALSE	FALSE	FALSE	FALSE	FALSE	FALSE	TRUE	FALSE	FALSE	FALSE	FALSE	FALSE	FALSE	FALSE	FALSE
Sf-Or_synthetic	So	2mer	0.861934	TRUE	TRUE	FALSE	FALSE	TRUE	FALSE	FALSE	FALSE	FALSE	TRUE	FALSE	FALSE	FALSE	FALSE	FALSE	FALSE	FALSE	FALSE	FALSE	FALSE
Of-Sr_synthetic	Os	2mer	0.859334	TRUE	TRUE	FALSE	FALSE	FALSE	TRUE	FALSE	FALSE	TRUE	FALSE	FALSE	FALSE	FALSE	FALSE	FALSE	FALSE	FALSE	FALSE	FALSE	FALSE
Of-Sf_synthetic	OS	2mer	0.842532	TRUE	TRUE	FALSE	FALSE	FALSE	TRUE	FALSE	FALSE	TRUE	FALSE	FALSE	FALSE	FALSE	FALSE	FALSE	FALSE	FALSE	FALSE	FALSE	FALSE

## Sheet: 2F - gWT_FeaturesiRF
CRE_norm_expression_WT_all	Distance_1.2	Distance_2.3	Total_spacing	Distance_O.S	Distance_K.E	Distance_K.O	Distance_K.S	Distance_E.S	Distance_E.O	Sox2_Total_P.Occ_mu8.MUT	Oct4_Total_P.Occ_mu10.MUT	Klf4_Total_P.Occ_mu8.MUT	Esrrb_Total_P.Occ_mu8.MUT	OSKE_P(Occ)_MUT	H3K27ac	H3K36me3	H3K4me1Ren	H3K4me1Snyder	H3K4me3Ren	H3K4me3Snyder	H3K9ac	H3K9me3	Peak_count	Esrrb.site_affinity	Klf4.site_affinity	Oct4.site_affinity	Sox2.site_affinity	Total_site_affinity	Klf1_Mut.count	Klf1_Mut.TotalAffinity	REST_Mut.count	REST_Mut.TotalAffinity	FOXA1_Mut.count	FOXA1_Mut.TotalAffinity	FOXM1_Mut.count	FOXM1_Mut.TotalAffinity	TCF7_Mut.count	TCF7_Mut.TotalAffinity	NANOG_Mut.count	NANOG_Mut.TotalAffinity	Nanog	Tcfcp2I1	CTCF	p300	REST	Ezh2	H3K27me3	H3K4me3	Mtf2
1.53093	19	2	21	19	81	2	81	81	81	0.0353495	0.200508	1.75083e-06	1.74953e-07	0.235859	0	0	0	0	0	0	0	0	1	0	9.91743	7.864	10.4159	38.913	0	0	0	0	0	0	0	0	1	10.7157	0	0	1	0	0	1	0	0	0	0	0
1.03755	10	18	28	81	18	10	81	81	81	0.0919265	3.43373e-05	1.51429e-09	9.47056e-07	0.0919618	0	0	0	0	1	1	1	0	1	13.6327	5.50459	7.712	0	34.565	0	0	0	0	0	0	0	0	1	7.71569	0	0	1	1	0	0	0	1	1	1	1
0.885444	17	19	36	82	82	82	82	19	17	0.00490236	0.00109982	8.93488e-09	7.03408e-09	0.0060022	0	0	0	0	0	0	0	0	2	8.7551	0	7.336	10.4159	48.0471	0	0	1	-4.64286	0	0	1	9.01493	1	7.88235	0	0	1	1	0	1	0	0	0	0	0
1.19924	5	5	10	81	5	81	81	81	5	0.0493054	0.00131981	2.0767e-07	1.20321e-08	0.0506254	0	0	0	0	0	0	0	0	1	5.67347	7.89908	12.832	0	47.3708	0	0	0	0	1	10.7424	1	10.2239	0	0	0	0	1	1	0	1	0	0	0	0	0
0.983663	19	15	34	19	82	82	82	82	15	2.5424	0.000488834	2.20024e-07	2.31676e-06	2.54289	0	0	1	1	0	0	0	0	2	15.7041	0	9.848	8.42478	33.9769	0	0	0	0	0	0	0	0	0	0	0	0	1	1	0	1	0	0	0	0	0
1.097	20	15	35	82	15	82	82	82	20	0.0335679	0.00139327	8.80395e-09	4.03269e-07	0.0349616	0	1	1	0	0	0	0	0	1	15.7041	5.3578	7.64	0	37.1713	0	0	0	0	0	0	0	0	0	0	1	8.46939	1	1	0	0	0	0	0	0	0
1.11027	15	14	29	82	14	82	82	15	82	0.776409	0.178554	1.92219e-09	9.8561e-07	0.954964	0	0	0	0	0	0	0	0	1	15.7041	8.55046	0	8.0708	65.0259	0	0	0	0	1	14.4848	1	11.7463	0	0	1	6.46939	1	0	0	1	0	0	0	0	0
6.9884	6	14	20	81	14	81	81	6	81	0.00538235	0.011225	6.64517e-09	7.70552e-06	0.0166151	0	0	0	1	0	0	0	0	1	15.551	12.2018	0	9.75221	37.505	0	0	0	0	0	0	0	0	0	0	0	0	1	1	1	0	0	0	0	0	0
0.965562	5	4	9	82	4	5	82	82	82	0.411811	2.90469e-05	2.20624e-06	2.01012e-08	0.411843	0	0	0	0	1	1	1	0	2	6.40816	16.0826	7.336	0	29.8268	0	0	0	0	0	0	0	0	0	0	0	0	1	1	0	1	0	0	0	1	0
0.689857	4	15	19	82	15	82	82	82	4	1.68371	0.0235586	6.06776e-13	6.21401e-09	1.70727	1	1	1	1	0	0	0	0	1	7.55102	11.7339	7.488	0	26.7729	0	0	0	0	0	0	0	0	0	0	0	0	1	1	0	1	0	0	0	0	0
1.6248	8	14	22	14	82	82	82	82	8	0.894651	0.275254	6.56334e-12	1.14918e-09	1.16991	0	0	0	0	0	0	0	0	3	8.92857	0	10.16	8.43363	75.3583	0	0	0	0	1	8.01515	3	27.8209	0	0	1	12	1	1	0	0	0	0	0	0	0
1.10688	3	20	23	82	20	3	82	82	82	0.422357	0.217191	5.97389e-09	7.47652e-06	0.639556	1	0	0	0	1	1	1	0	1	8.56122	7.6789	9.68	0	25.9201	0	0	0	0	0	0	0	0	0	0	0	0	1	1	0	1	0	0	0	1	0
1.102	7	5	12	81	81	81	5	7	81	0.00770704	0.49285	2.63525e-11	8.61876e-12	0.500557	0	0	1	0	0	0	0	0	1	6.77551	13.6789	0	9.73451	30.1889	0	0	0	0	0	0	0	0	0	0	0	0	1	1	0	0	0	0	0	1	0
1.09669	13	9	22	81	13	81	81	9	81	0.00741494	0.0217985	1.94559e-09	5.97683e-10	0.0292134	0	0	0	0	0	0	0	0	3	15.551	6.0367	0	10.2478	31.8355	0	0	0	0	0	0	0	0	0	0	0	0	1	1	0	1	0	0	0	0	0
2.32457	7	4	11	82	7	82	82	4	82	0.717045	0.00104016	1.17076e-09	7.13386e-08	0.718085	1	0	0	0	0	0	0	0	2	5.62245	5.95413	0	8.0885	40.0079	0	0	1	-7.34286	1	5.83333	0	0	1	7.16667	0	0	1	1	0	0	0	0	0	1	0
1.01545	1	12	13	1	81	81	12	81	81	1.29506	0.00126247	3.23736e-09	5.92327e-07	1.29632	1	0	0	0	0	0	0	0	1	8.17347	7.52294	7.712	9.73451	33.1429	0	0	0	0	0	0	0	0	0	0	0	0	1	1	0	0	0	0	0	1	0
1.26103	16	1	17	82	1	82	82	16	82	0.00595589	0.00922613	1.57237e-09	4.39995e-12	0.015182	1	0	0	0	0	0	0	0	1	6.85714	5.3578	0	9.75221	40.5486	0	0	1	-1.35714	1	6.0303	1	11.194	0	0	0	0	1	1	1	1	0	0	0	1	0
1.01622	2	13	15	82	13	82	2	82	82	0.00130373	0.00173687	2.04261e-05	7.17273e-06	0.0030682	0	0	0	0	0	0	0	0	1	13.0204	10.1651	0	8.0708	36.8017	1	5.54545	0	0	0	0	0	0	0	0	0	0	1	1	1	0	0	0	0	0	0
2.53661	8	4	12	81	4	81	81	81	8	0.755867	0.114115	3.03175e-10	1.20197e-08	0.869982	0	0	0	0	0	0	0	0	1	7.31633	9.23853	7.952	0	40.1765	0	0	0	0	1	5.86364	1	9.80597	0	0	0	0	0	1	0	0	0	0	0	0	0
0.994338	15	6	21	15	81	81	81	6	81	0.887613	0.000977339	3.35903e-06	1.92413e-09	0.888593	0	0	0	0	0	1	0	0	1	9.45918	0	9.904	9.76106	29.1242	0	0	0	0	0	0	0	0	0	0	0	0	0	1	1	0	0	0	0	0	0
1.73329	19	1	20	81	19	1	81	81	81	0.0258635	0.00893687	1.89646e-08	1.3646e-07	0.0348005	0	0	0	1	0	0	0	0	1	10.1939	6.84404	9.44	0	36.2961	0	0	0	0	1	9.81818	0	0	0	0	0	0	1	1	0	1	0	0	0	0	0
0.911073	20	6	26	20	82	82	82	6	82	1.18464	0.00532213	2.12541e-14	1.0857e-08	1.18996	0	0	1	0	0	0	0	0	2	8.57143	0	8.368	8.42478	25.3642	0	0	0	0	0	0	0	0	0	0	0	0	1	1	1	0	0	0	0	0	0
0.760386	4	6	10	4	82	82	82	6	82	0.765731	0.0112039	1.36656e-14	1.68638e-08	0.776935	0	0	0	0	0	0	0	0	1	5.44898	0	10.76	8.59292	33.0568	0	0	0	0	0	0	0	0	1	8.2549	0	0	1	0	0	0	0	0	0	0	0
2.56785	6	8	14	81	6	81	81	81	8	0.913986	0.669442	5.07926e-10	1.07758e-13	1.58343	0	0	1	0	0	0	0	0	1	14.0816	7.24771	11.632	0	89.0464	0	0	1	-4.72857	1	6.83333	0	0	0	0	0	0	1	1	1	0	0	0	0	0	0
2.56785	6	8	14	81	6	81	81	81	8	1.39549e-06	2.92218e-07	2.85048e-06	1.10044e-08	4.54919e-06	0	0	1	0	0	0	0	0	1	14.0816	7.24771	11.632	0	89.0464	0	0	1	-4.72857	1	6.83333	0	0	0	0	0	0	1	1	1	0	0	0	0	0	0
6.41436	1	4	5	1	81	81	81	4	81	0.0131959	0.0194066	4.7109e-07	1.42873e-06	0.0326044	0	0	0	0	0	0	0	0	3	10.1837	0	8.208	10.4336	52.9519	0	0	1	-4.38571	0	0	0	0	1	9.26471	1	10.4762	1	1	0	1	0	0	0	0	0
1.17107	5	14	19	82	14	82	82	5	82	0.00386466	0.000395439	1.0262e-05	1.527e-09	0.00427036	1	0	1	0	1	0	1	0	2	6.26531	9.05505	0	8.56637	93.9911	0	0	2	-7.12857	0	0	2	16.3582	5	46.6176	0	0	1	1	1	1	0	0	0	1	0
1.42629	3	9	12	81	9	81	3	81	81	0.901133	0.013306	4.92833e-09	9.97441e-06	0.914449	0	0	1	0	0	0	0	0	1	6.55102	5.34862	0	8.59292	33.292	1	5.51515	0	0	0	0	0	0	1	7.28431	0	0	0	0	0	0	0	0	0	0	0
1.12881	14	4	18	82	82	82	82	14	4	0.899884	0.074634	2.18579e-06	5.62406e-10	0.97452	0	0	0	0	0	0	0	0	1	7.77551	0	8.12	10.2566	61.7958	0	0	0	0	1	7.31818	0	0	1	9.10784	2	19.2177	1	1	0	1	0	0	0	0	0
1.59326	13	13	26	13	82	13	82	82	82	1.89616	2.47549e-05	1.27099e-06	8.36546e-09	1.89618	0	0	0	0	0	0	0	0	1	0	4.98165	8.208	10.2478	46.733	0	0	0	0	2	15.3636	0	0	0	0	1	7.93197	1	0	1	1	0	0	0	0	0
4.26919	12	5	17	82	5	12	82	82	82	0.0383488	0.0441151	1.13721e-09	2.66794e-09	0.0824639	0	0	1	0	0	0	0	0	1	8.11224	4.91743	7.712	0	35.8357	0	0	0	0	1	7.30303	1	7.79104	0	0	0	0	1	1	0	1	0	0	0	0	0
4.7093	17	15	32	81	81	15	81	81	17	0.00581319	0.0132874	5.09584e-06	1.29952e-08	0.0191057	0	0	0	0	0	0	0	0	1	6.85714	7.0367	10.16	0	32.1519	0	0	0	0	0	0	0	0	1	8.09804	0	0	0	0	1	0	0	0	0	0	0
1.03712	13	11	24	81	81	81	11	13	81	4.831e-06	4.20798e-06	9.76712e-06	1.01778e-07	1.89079e-05	1	0	1	0	0	0	0	0	1	7.31633	10.7615	0	9.93805	28.0159	0	0	0	0	0	0	0	0	0	0	0	0	1	1	1	0	0	0	0	0	0
1.90297	18	10	28	10	82	82	18	82	82	0.315147	0.0435967	4.0754e-08	2.94421e-09	0.358744	0	0	0	0	0	0	0	0	2	0	15.7064	8.088	8.76991	49.7892	0	0	0	0	0	0	1	8.62687	1	8.59804	0	0	1	1	0	1	0	0	0	0	0
2.16209	18	16	34	16	82	18	82	82	82	0.000548058	6.11477e-06	1.80017e-07	6.05146e-07	0.000554958	0	0	0	0	1	0	0	0	3	0	15.9541	10.16	8.43363	34.5477	0	0	0	0	0	0	0	0	0	0	0	0	1	1	0	1	0	0	0	1	0
1.02024	18	4	22	81	18	81	81	81	4	0.0948224	0.000239376	5.80495e-10	7.87926e-07	0.0950626	0	0	0	0	1	1	1	0	1	7.31633	8.3578	7.712	0	30.3861	0	0	0	0	0	0	1	7	0	0	0	0	0	0	0	1	0	0	0	1	0
3.91888	7	4	11	82	4	7	82	82	82	0.00793209	0.0135574	8.059e-07	5.97749e-06	0.0214963	1	0	0	0	0	0	0	0	1	8.7551	6.42202	10.16	0	25.3371	0	0	0	0	0	0	0	0	0	0	0	0	1	1	0	1	0	0	0	0	0
0.901118	6	14	20	81	6	81	81	81	14	0.0686943	0.000112501	7.85233e-06	5.71805e-09	0.0688147	0	0	0	0	0	0	0	0	1	5.62245	8.27523	10.16	0	44.2444	0	0	0	0	1	9.51515	1	10.6716	0	0	0	0	1	0	0	1	0	0	0	0	0
3.00724	2	2	4	81	2	81	2	81	81	0.000120153	0.0101683	2.65529e-07	2.70584e-07	0.010289	1	0	0	0	0	0	0	0	2	8.7551	9.66972	0	8.07965	34.5143	0	0	0	0	0	0	0	0	1	8.0098	0	0	1	1	1	1	0	0	0	0	0
1.28105	14	8	22	81	8	81	14	81	81	0.00922431	0.00336241	1.7146e-09	1.57074e-09	0.0125867	0	0	0	0	0	0	0	0	1	6.64286	7.24771	0	8.61062	22.5012	0	0	0	0	0	0	0	0	0	0	0	0	1	1	0	1	0	0	0	0	0
1.10431	15	11	26	15	82	82	82	11	82	0.234848	0.0347058	9.08638e-08	2.15321e-11	0.269554	0	0	0	0	0	0	0	0	1	8.31633	0	10.16	7.76991	49.2261	0	0	0	0	1	5.83333	0	0	1	10.4118	1	6.73469	1	0	0	0	0	0	0	0	0
2.28803	12	11	23	11	81	12	81	81	81	0.141148	0.563111	2.28345e-10	1.27601e-06	0.704261	1	0	0	0	0	0	0	0	1	0	5.95413	7.608	10.2478	31.0746	0	0	0	0	0	0	0	0	1	7.26471	0	0	1	0	0	1	0	0	0	1	0
7.25131	4	2	6	4	82	82	2	82	82	1.31255	0.0131106	1.9579e-05	2.78084e-08	1.32568	0	0	0	0	0	0	0	0	3	0	14.055	12.832	10.4336	44.5927	0	0	0	0	0	0	0	0	0	0	1	7.27211	1	1	0	1	0	0	0	1	0
1.22768	14	18	32	81	81	81	18	14	81	0.29904	0.00567372	3.37501e-10	1.45616e-09	0.304714	1	0	0	0	1	1	1	0	1	7.83673	12.2018	0	8.42478	28.4633	0	0	0	0	0	0	0	0	0	0	0	0	1	1	0	0	0	1	1	1	1
0.889879	16	5	21	82	5	82	82	16	82	0.885167	0.000147929	5.92874e-08	2.66379e-07	0.885315	0	0	0	0	0	0	0	0	1	8.10204	7.33945	0	8.09735	60.5073	0	0	0	0	1	11.0152	1	16.1493	1	9.80392	0	0	0	0	1	0	0	0	0	0	0
1.1974	13	13	26	81	13	81	81	81	13	0.00348657	5.10354e-05	1.37451e-09	4.36838e-12	0.00353761	0	0	1	0	0	0	0	0	1	10.949	5.90826	9.68	0	26.5373	0	0	0	0	0	0	0	0	0	0	0	0	1	1	0	0	0	0	0	0	0
1.47373	18	2	20	81	18	81	81	81	2	0.00896495	0.000105677	2.76464e-06	3.10909e-06	0.0090765	1	0	0	0	0	0	0	0	1	15.551	4.85321	10.76	0	38.3356	0	0	1	7.17143	0	0	0	0	0	0	0	0	1	1	0	0	0	0	0	0	0
14.4877	5	14	19	82	82	82	14	5	82	3.21587e-05	4.36782e-06	1.27777e-08	4.77939e-08	3.6587e-05	0	0	0	0	0	0	0	0	1	10.949	5.09174	0	8.0885	46.6208	0	0	1	-5.78571	0	0	0	0	2	16.7059	0	0	1	1	0	0	0	0	0	0	0
5.57015	12	16	28	82	82	16	12	82	82	0.0110376	0.0139913	1.08296e-07	3.52144e-11	0.025029	1	0	0	0	0	1	0	0	1	0	8.55046	10.76	8.0531	27.3636	0	0	0	0	0	0	0	0	0	0	0	0	1	1	0	1	0	0	0	1	0
0.866664	14	2	16	81	14	81	81	81	2	0.00179159	1.61671e-05	7.89182e-06	2.86157e-09	0.00181565	0	0	1	1	0	0	0	0	2	10.0306	7.02752	8.912	0	34.7612	0	0	0	0	0	0	1	8.79104	0	0	0	0	0	1	0	1	0	0	0	0	0
1.78083	8	11	19	82	8	11	82	82	82	0.0177872	0.000172867	6.96761e-06	3.02364e-09	0.0179671	0	0	0	0	0	0	0	0	1	12.0102	5.30275	7.416	0	41.0463	1	6.31818	1	-2.52857	0	0	0	0	1	7.47059	0	0	0	1	0	1	0	0	0	0	0
1.10928	20	1	21	82	82	82	20	1	82	0.471237	0.00748912	4.76481e-09	2.20525e-06	0.478729	0	0	1	0	0	0	0	0	1	5.91837	7.58716	0	8.0885	40.2695	1	4.01515	1	-6.58571	0	0	1	8.07463	0	0	0	0	0	1	1	0	0	0	0	1	0
0.973207	7	20	27	82	7	82	20	82	82	0.00970385	1.98808e-06	2.71516e-07	3.33269e-08	0.00970615	1	0	1	0	0	0	0	0	1	10.2347	9.2844	0	9.93805	29.4571	0	0	0	0	0	0	0	0	0	0	0	0	1	1	0	0	0	0	0	1	0
0.927789	6	6	12	81	6	81	81	81	6	0.108944	0.0174212	9.63533e-10	4.59612e-07	0.126366	0	0	1	0	0	0	0	0	1	7.2449	6.83486	9.848	0	30.3849	0	0	1	-6.45714	0	0	0	0	0	0	0	0	1	1	0	1	0	0	0	1	0
1.41988	5	1	6	81	1	81	81	5	81	1.31051	0.0134404	2.39041e-07	2.49631e-06	1.32395	1	0	0	0	1	1	1	0	1	8.7551	7.49541	0	9.75221	26.0027	0	0	0	0	0	0	0	0	0	0	0	0	0	1	1	1	0	0	0	1	0
0.820634	1	7	8	1	82	82	82	82	7	0.00355393	0.0148537	1.23799e-05	1.0132e-07	0.0184201	1	0	0	0	0	0	0	0	2	13.6327	0	10.88	8.40708	46.2799	1	9.30303	1	-4.05714	0	0	0	0	0	0	0	0	1	1	0	1	0	0	0	1	0
1.07194	5	5	10	81	5	5	81	81	81	0.0498083	0.000615904	1.30623e-05	7.02033e-10	0.0504373	0	0	0	0	0	0	0	0	1	9.87755	5.48624	7.944	0	23.3078	0	0	0	0	0	0	0	0	0	0	0	0	1	0	0	1	0	0	0	0	0
1.08934	19	9	28	81	9	81	19	81	81	0.949499	0.134934	1.63855e-11	3.2789e-10	1.08443	0	1	1	0	0	0	0	0	1	10.0306	10.4128	0	8.61062	29.054	0	0	0	0	0	0	0	0	0	0	0	0	0	1	1	0	0	0	0	1	0
1.06102	2	15	17	82	15	82	2	82	82	0.000274776	0.009404	1.51301e-06	4.53424e-10	0.00968029	0	0	1	1	0	0	0	0	1	8.81633	8.89908	0	7.76991	25.4853	0	0	0	0	0	0	0	0	0	0	0	0	1	0	0	1	0	0	0	0	0
0.977043	3	16	19	82	3	82	82	16	82	0.520357	0.0134517	2.18701e-06	5.28279e-08	0.533811	1	0	0	0	0	1	0	0	2	6.2551	4.92661	0	9.75221	24.6915	1	3.75758	0	0	0	0	0	0	0	0	0	0	1	1	1	1	0	0	0	1	0
1.00457	11	3	14	81	3	81	81	11	81	0.00326468	0.0046539	8.10439e-09	7.30821e-07	0.00791932	0	0	0	0	0	0	0	0	1	6.85714	6.55046	0	8.58407	30.8446	0	0	0	0	0	0	0	0	1	8.85294	0	0	1	1	0	1	0	0	0	0	0
1.21393	20	4	24	81	20	81	81	4	81	0.000237306	0.0233436	3.92007e-09	7.97977e-08	0.023581	0	0	1	0	0	0	0	0	1	7.18367	11.8257	0	8.43363	68.2177	0	0	2	-14.1714	0	0	1	8.35821	2	18.2451	0	0	1	1	0	0	0	0	0	0	0
1.15062	3	12	15	3	81	81	12	81	81	0.0479054	2.16688e-05	2.52187e-10	5.23401e-10	0.047927	1	0	0	0	1	1	0	0	1	0	7.02752	9	9.75221	55.6273	0	0	0	0	0	0	1	7.29851	3	22.549	0	0	1	0	0	1	0	0	0	1	0
1.21622	15	16	31	82	16	82	15	82	82	0.969112	0.00437553	9.23079e-06	1.44071e-09	0.973496	0	0	0	0	1	1	1	0	1	7.32653	7.44037	0	8.0885	27.6887	1	4.83333	0	0	0	0	0	0	0	0	0	0	1	1	0	0	0	0	1	1	1
0.887162	6	9	15	82	6	82	82	9	82	0.314133	0.0114191	5.99523e-06	3.039e-06	0.325561	0	1	1	0	0	0	0	0	1	6.37755	16.0826	0	8.0708	39.6056	0	0	0	0	0	0	1	9.07463	0	0	0	0	1	1	1	0	0	0	0	0	0
0.920027	9	8	17	82	8	9	82	82	82	0.74638	0.000109151	1.02617e-05	1.27878e-09	0.746499	1	0	0	0	1	1	1	0	1	11.2755	5.56881	7.952	0	24.7963	0	0	0	0	0	0	0	0	0	0	0	0	1	1	0	0	0	0	0	1	0
1.15984	14	9	23	82	82	82	9	14	82	0.0332499	0.000416934	1.69512e-09	2.74849e-08	0.0336669	0	0	1	0	1	0	1	0	1	9.62245	6.3211	0	8.58407	31.5419	0	0	1	-7.01429	0	0	0	0	0	0	0	0	0	1	0	1	0	0	0	1	0
1.02462	20	14	34	81	14	20	81	81	81	0.827145	0.261002	9.18947e-10	1.50942e-08	1.08815	1	0	1	0	0	1	1	0	1	7.31633	5.34862	11.632	0	24.2969	0	0	0	0	0	0	0	0	0	0	0	0	1	1	0	0	0	0	0	0	0
0.85855	10	11	21	82	11	10	82	82	82	0.834859	0.00396652	2.09877e-08	1.61706e-09	0.838825	1	0	1	0	1	1	1	0	2	5.38776	6.3211	7.952	0	30.1002	2	10.4394	0	0	0	0	0	0	0	0	0	0	1	1	0	1	0	0	0	1	0
0.67827	17	8	25	82	8	82	82	82	17	0.0334253	0.0314851	8.34806e-10	8.95055e-11	0.0649104	0	0	0	0	0	0	0	0	1	9.84694	15.578	9.904	0	40.5268	1	3.71212	2	-1.48571	0	0	0	0	0	0	0	0	1	1	0	0	1	0	0	0	0
1.55206	15	1	16	82	82	15	1	82	82	0.716138	1.84549e-05	1.00451e-08	1.68436e-09	0.716156	0	0	0	1	0	0	0	0	1	0	11.8165	7.776	8.76991	28.3624	0	0	0	0	0	0	0	0	0	0	0	0	0	1	0	0	0	0	0	0	0
1.07981	10	6	16	81	81	6	81	81	10	0.48406	0.0658393	1.5249e-10	5.7801e-07	0.549899	1	0	0	0	1	1	1	0	2	10.0408	12.3761	11.632	0	34.0489	0	0	0	0	0	0	0	0	0	0	0	0	1	0	1	0	0	0	0	1	0
6.7008	19	1	20	1	82	82	82	82	19	0.0042178	5.92683e-05	7.0062e-08	3.61287e-06	0.00428075	0	0	0	0	0	0	0	0	1	12.3469	0	7.712	8.41593	35.7395	0	0	0	0	0	0	0	0	1	7.26471	0	0	0	1	1	0	0	0	0	0	0
0.962028	9	18	27	82	82	82	18	9	82	0.0805055	0.000866908	9.03149e-07	7.75105e-10	0.0813733	0	0	1	0	0	0	0	0	1	10.7245	10.4128	0	9.75221	38.4091	0	0	0	0	0	0	0	0	1	7.51961	0	0	1	1	1	1	0	0	0	0	0
1.13996	3	18	21	82	18	82	82	3	82	0.00792702	0.187876	7.69922e-07	1.16145e-07	0.195804	1	0	0	0	0	0	0	0	1	15.7041	5.59633	0	8.0708	50.1873	2	10.5303	2	-10.2857	0	0	0	0	0	0	0	0	1	1	0	0	0	0	0	1	0
0.831287	5	15	20	15	82	82	82	82	5	0.461097	9.15218e-06	7.83723e-09	4.16301e-08	0.461106	1	0	0	0	1	1	1	0	1	11.4286	0	8.376	8.56637	43.3472	0	0	0	0	1	6.40909	1	8.56716	0	0	0	0	1	1	1	0	0	0	0	1	0
0.831138	17	17	34	82	82	17	17	82	82	0.0996944	0.00138925	3.8924e-11	1.63414e-11	0.101084	0	0	0	0	1	1	0	0	1	0	5.63303	7.776	9.93805	23.3471	0	0	0	0	0	0	0	0	0	0	0	0	1	1	0	0	0	0	0	1	0
0.700293	11	8	19	8	81	81	81	81	11	0.0839697	0.00380441	8.52782e-10	7.42564e-09	0.0877741	0	0	0	0	0	0	0	0	1	13.0204	0	7.864	7.76991	28.6543	0	0	0	0	0	0	0	0	0	0	0	0	0	1	1	0	0	0	0	0	0
0.929468	19	5	24	81	19	81	81	81	5	0.952193	0.000411945	5.83058e-09	7.59975e-07	0.952606	1	1	1	0	0	0	0	0	1	11.4592	15.578	8.648	0	73.6836	1	6.06061	0	0	1	8.57576	1	7.28358	2	16.0784	0	0	1	0	0	0	0	0	0	1	0
2.24617	8	12	20	8	82	12	82	82	82	0.0353332	0.000437013	1.23829e-13	8.19005e-09	0.0357702	1	0	0	0	0	0	1	0	1	0	5.11927	7.336	9.73451	29.5917	0	0	0	0	0	0	0	0	1	7.40196	0	0	1	1	1	1	0	0	0	0	0
1.90629	8	15	23	82	8	82	82	15	82	0.0131311	0.00320897	4.22759e-10	1.12823e-11	0.0163401	0	0	0	0	0	0	0	0	3	15.551	10.7615	0	10.2566	36.5691	0	0	0	0	0	0	0	0	0	0	0	0	0	1	1	0	0	0	0	0	0
1.0644	8	8	16	81	81	81	8	8	81	0.00292874	0.000557927	8.47216e-07	7.75165e-08	0.00348759	0	0	1	0	0	0	1	0	1	5.38776	5.48624	0	8.42478	26.436	0	0	0	0	0	0	0	0	1	7.13725	0	0	1	0	0	0	0	0	0	1	0
2.76895	10	6	16	81	10	81	81	6	81	0.000440357	0.0034033	8.54583e-06	1.34264e-08	0.00385221	1	0	0	0	0	0	0	0	1	10.1939	11.8257	10.32	8.0708	44.5961	0	0	1	-4.18571	0	0	0	0	0	0	0	0	1	1	0	1	0	0	0	1	0
7.80489	13	4	17	82	4	82	82	13	82	0.00153371	0.00630443	4.52901e-09	8.4571e-11	0.00783815	0	0	0	0	1	1	0	0	1	7.33673	15.7064	0	10.2478	37.6697	1	4.37879	0	0	0	0	0	0	0	0	0	0	1	0	0	1	0	0	0	1	0
4.11998	3	1	4	81	1	81	81	81	3	0.000386637	0.0142891	1.8034e-08	7.58333e-10	0.0146757	0	0	1	0	0	0	0	0	1	8.57143	12.2018	9.68	0	39.2559	0	0	0	0	0	0	0	0	0	0	1	8.80272	1	1	0	0	0	0	0	0	0
0.863684	13	9	22	81	81	81	13	9	81	0.382628	0.0372338	1.49634e-11	1.1238e-07	0.419862	1	0	0	0	0	1	0	0	2	10.0408	9.79817	0	9.76106	59.2001	0	0	0	0	0	0	0	0	0	0	0	0	1	1	1	0	0	0	0	1	0
0.863684	13	9	22	81	81	81	13	9	81	0.0510035	0.000520568	5.7263e-09	1.92939e-06	0.051526	1	0	0	0	0	1	0	0	2	10.0408	9.79817	0	9.76106	59.2001	0	0	0	0	0	0	0	0	0	0	0	0	1	1	1	0	0	0	0	1	0
6.34393	3	12	15	82	3	82	12	82	82	0.0717359	0.442027	9.83876e-11	4.14724e-08	0.513763	0	0	1	0	0	1	1	0	1	12.0102	14.1835	0	8.59292	36.0009	0	0	1	-1.21429	0	0	0	0	0	0	0	0	1	1	0	0	0	0	0	0	0
1.0478	15	15	30	82	82	15	15	82	82	0.000886157	0.263475	3.93832e-06	3.57256e-10	0.264365	0	0	0	0	0	0	0	0	1	0	7.45872	8.12	8.0531	32.5338	0	0	0	0	0	0	0	0	1	8.90196	0	0	0	0	1	0	0	0	0	0	0
7.40918	10	6	16	81	10	81	81	81	6	0.835631	0.658665	5.42797e-12	1.15009e-09	1.4943	1	0	0	0	0	0	0	0	2	6.10204	11.8165	7.52	0	25.4385	0	0	0	0	0	0	0	0	0	0	0	0	1	1	0	1	0	0	0	0	0
1.74504	9	20	29	9	81	20	81	81	81	0.318573	0.143834	7.54363e-09	1.40663e-09	0.462407	0	0	0	0	0	0	0	0	2	0	6.27523	9	8.40708	30.2197	0	0	0	0	0	0	0	0	0	0	1	6.53741	1	1	0	1	0	0	0	0	0
1.36787	6	5	11	81	81	6	5	81	81	0.202474	0.0737296	1.06585e-08	6.99455e-08	0.276203	0	0	0	0	0	1	0	0	2	0	6.77982	9.56	7.89381	56.0232	0	0	1	-1.2	0	0	1	9.0597	1	13.6863	1	7.84354	1	1	0	1	0	0	0	1	0
0.945055	8	19	27	8	81	81	19	81	81	0.0466262	0.0216367	4.1155e-07	1.18949e-05	0.0682752	0	0	1	0	0	0	0	0	1	0	6.9633	7.336	9.93805	31.806	0	0	0	0	0	0	0	0	1	7.56863	0	0	1	1	0	1	0	0	0	0	0
0.954635	12	16	28	81	81	81	16	12	81	4.78358e-05	0.000514649	2.20426e-06	1.11009e-07	0.0005648	0	0	0	0	0	0	0	0	1	15.7041	11.9817	0	8.43363	36.1194	0	0	0	0	0	0	0	0	0	0	0	0	1	1	0	1	0	0	0	0	0
1.17952	6	12	18	81	6	81	81	81	12	0.00228967	0.00101009	2.63908e-08	4.21679e-06	0.003304	0	0	0	0	1	1	1	0	1	11.2755	8.11009	7.416	0	26.8016	0	0	0	0	0	0	0	0	0	0	0	0	0	1	0	1	0	0	0	1	0
0.993929	16	18	34	18	82	16	82	82	82	0.0715041	0.285398	3.61427e-07	8.1817e-08	0.356903	1	0	0	0	1	1	1	0	1	0	5.00917	8.208	8.58407	28.6497	0	0	0	0	1	6.84848	0	0	0	0	0	0	1	1	0	1	0	0	0	1	0
0.924098	1	10	11	81	81	1	10	81	81	0.030573	0.000857736	3.12155e-08	3.15923e-07	0.0314311	0	0	0	0	0	0	0	0	1	0	13.0367	9	9.93805	49.612	0	0	0	0	1	8.69697	1	8.9403	0	0	0	0	1	1	1	1	0	0	0	0	0
1.67001	13	20	33	82	82	82	20	13	82	1.52487	0.0133746	6.93137e-08	2.22018e-06	1.53825	0	0	0	0	0	1	0	0	1	10	7	0	10.2566	44.1525	0	0	1	-2.4	1	6.22727	1	8.26866	0	0	0	0	1	1	0	0	0	0	0	1	0
1.51885	19	20	39	81	81	81	81	19	20	0.116978	0.000372731	2.0365e-08	1.94518e-08	0.117351	0	0	1	0	0	0	0	0	1	15.7041	0	7.712	10.2566	33.6727	0	0	0	0	0	0	0	0	0	0	0	0	1	1	0	0	0	0	0	0	0
9.51382	14	17	31	17	81	81	81	14	81	0.0813621	0.00147712	4.44742e-07	1.26336e-05	0.0828523	0	0	0	0	0	0	0	0	1	8.06122	0	8.912	10.2301	27.2033	0	0	0	0	0	0	0	0	0	0	0	0	1	1	1	1	0	0	0	0	0
0.960802	4	2	6	81	81	4	81	81	2	0.518087	0.000497299	6.54711e-13	2.75208e-10	0.518584	0	0	1	0	0	0	0	0	1	5.38776	13.0367	9.12	0	34.8092	0	0	0	0	0	0	0	0	1	7.26471	0	0	1	1	0	0	0	0	0	0	0
0.778566	14	5	19	82	82	82	14	5	82	0.0238563	0.0528556	1.66509e-08	7.6842e-07	0.0767127	0	0	0	1	0	0	0	0	1	6.08163	5.30275	0	7.86726	19.2516	0	0	0	0	0	0	0	0	0	0	0	0	0	0	0	0	0	0	0	0	0
0.938338	20	4	24	81	4	81	81	20	81	0.694231	0.00984849	2.44496e-09	5.81317e-07	0.704081	0	1	0	0	0	0	0	0	1	6.85714	4.87156	0	9.76106	46.1313	0	0	1	-7.01429	1	6.0303	1	11.597	0	0	0	0	0	0	1	0	0	0	0	0	0
12.4148	2	6	8	2	82	6	82	82	82	0.276774	0.0044253	5.41938e-08	1.73153e-05	0.281217	0	0	0	0	0	0	0	0	1	0	16.0826	9.848	7.88496	58.3586	1	6.59091	1	1.51429	1	6.75758	0	0	0	0	1	9.68027	1	1	0	0	0	0	0	0	0
1.12542	6	8	14	81	8	81	81	6	81	0.0652499	0.000501432	2.0156e-06	7.62664e-10	0.0657534	1	0	0	0	1	1	1	0	2	13.6327	7.91743	0	8.58407	30.1342	0	0	0	0	0	0	0	0	0	0	0	0	1	1	0	0	0	0	0	1	0
1.0939	20	9	29	82	82	82	20	9	82	0.0617974	7.00803e-06	1.10127e-08	2.31304e-06	0.0618067	0	0	1	0	0	0	0	0	1	7.89796	7.08257	0	8.42478	23.4053	0	0	0	0	0	0	0	0	0	0	0	0	1	1	0	1	0	0	0	0	0
1.64984	1	9	10	81	81	81	9	1	81	1.06469	0.00242374	1.05516e-13	2.50404e-08	1.06712	0	0	0	0	0	0	0	0	1	15.7041	4.79817	0	10.2566	39.6636	0	0	0	0	0	0	0	0	0	0	1	8.90476	0	1	0	1	0	0	0	0	0
1.2114	7	1	8	1	82	82	82	7	82	0.734731	7.46961e-06	1.049e-09	7.27801e-10	0.734738	0	0	0	0	1	1	0	0	2	6.79592	0	10.88	10.4336	28.1095	0	0	0	0	0	0	0	0	0	0	0	0	1	1	0	1	0	0	0	1	0
1.1695	12	3	15	81	81	12	3	81	81	0.0246223	0.0172481	5.87543e-11	5.24646e-10	0.0418704	0	0	0	0	0	0	0	0	1	0	7.12844	7.192	9.75221	38.9155	0	0	1	-7.84286	0	0	1	7	0	0	0	0	1	1	1	0	0	0	0	0	0
1.01275	3	13	16	13	82	3	82	82	82	0.11403	0.0270165	3.90809e-13	5.92125e-08	0.141046	0	0	1	0	0	0	0	0	1	0	7.46789	8.912	10.2389	26.6188	0	0	0	0	0	0	0	0	0	0	0	0	1	0	0	0	0	0	0	0	0
0.96029	6	7	13	82	7	82	82	6	82	0.0240098	0.00183134	2.14354e-10	2.72296e-06	0.0258439	1	0	0	0	0	1	0	0	1	6.37755	8.27523	0	10.4336	25.0864	0	0	0	0	0	0	0	0	0	0	0	0	1	1	0	0	0	0	0	0	0
1.57673	16	5	21	82	16	82	82	82	5	0.307386	0.000936115	6.16819e-08	2.50971e-07	0.308322	0	0	1	0	0	0	0	0	1	15.551	11.9817	7.824	0	43.9089	0	0	0	0	0	0	1	8.55224	0	0	0	0	0	1	0	0	0	0	0	0	0
1.74401	19	2	21	2	81	81	81	19	81	1.38378	0.0122391	1.03558e-05	2.32131e-05	1.39606	0	0	0	0	0	0	0	0	1	7.0102	0	10.32	8.75221	33.5236	0	0	0	0	0	0	0	0	1	7.44118	0	0	1	1	0	0	0	0	0	0	0
3.68452	20	2	22	81	20	81	81	2	81	1.77553	0.000104513	1.36442e-09	3.37283e-08	1.77564	1	0	0	0	0	0	0	0	2	14.0816	15.578	0	9.93805	39.5977	0	0	0	0	0	0	0	0	0	0	0	0	0	1	1	1	0	0	0	0	0
0.828695	3	19	22	81	81	3	81	81	19	0.000813107	4.37913e-05	3.35024e-06	3.64793e-06	0.000863896	1	0	0	0	1	1	1	0	2	10.1939	6.0367	7.952	0	24.1826	0	0	0	0	0	0	0	0	0	0	0	0	1	1	0	0	0	0	0	1	0
4.47106	17	13	30	81	13	17	81	81	81	0.0228018	0.00205088	1.17882e-07	9.47683e-09	0.0248528	0	0	1	1	0	0	0	0	1	15.551	10.7706	10.88	0	54.861	0	0	0	0	1	7.18182	1	10.4776	0	0	0	0	1	1	0	0	0	0	0	0	0
1.11436	5	1	6	82	82	1	5	82	82	0.00609617	0.0258264	2.10132e-09	9.84708e-09	0.0319226	0	0	0	1	0	0	0	0	1	0	15.9541	7.952	7.76991	31.676	0	0	0	0	0	0	0	0	0	0	0	0	0	0	1	0	0	0	0	0	0
2.06902	3	18	21	82	18	82	82	82	3	0.00193383	0.000968574	5.32974e-07	4.64531e-10	0.00290293	0	0	1	0	0	0	0	0	1	13.6327	5.57798	10.32	0	53.6465	0	0	0	0	1	8.75758	2	15.3582	0	0	0	0	1	0	1	0	0	0	0	0	0
1.09228	2	8	10	81	8	81	81	81	2	0.0647538	0.0336299	3.69828e-08	3.10025e-10	0.0983837	0	0	1	0	0	0	1	0	1	15.7041	5.33945	7.488	0	30.5601	0	0	1	-2.02857	0	0	0	0	0	0	0	0	1	1	0	1	0	0	0	0	0
1.04509	20	11	31	82	20	11	82	82	82	0.835961	0.000370637	1.75414e-12	7.13914e-09	0.836331	0	0	1	0	0	0	0	0	1	9.84694	8.86239	7.648	0	40.2271	0	0	0	0	1	6.27273	1	7.59701	0	0	0	0	0	1	0	0	0	0	0	1	0
1.45433	15	10	25	81	81	15	10	81	81	0.0179603	0.000286001	4.55241e-08	2.63795e-08	0.0182464	0	0	0	0	0	0	0	0	2	0	4.89908	12.832	8.75221	48.4511	0	0	0	0	2	13.4848	0	0	0	0	1	8.48299	1	1	0	0	0	0	0	0	0
1.6312	2	10	12	10	82	82	82	2	82	0.423886	2.81426e-06	1.42285e-08	5.30791e-10	0.423889	0	0	0	0	0	0	0	0	1	11.4286	0	7.52	8.59292	27.5415	0	0	0	0	0	0	0	0	0	0	0	0	1	1	0	0	0	0	0	0	0
1.56098	16	15	31	82	16	15	82	82	82	0.0423484	0.00356471	6.87496e-08	2.8765e-07	0.0459134	0	0	0	0	0	0	0	0	1	8.82653	15.578	7.776	0	67.0724	0	0	0	0	0	0	1	10.3134	2	17.5784	1	7	1	1	1	0	0	0	0	0	0
0.941196	17	13	30	82	82	13	17	82	82	0.428732	1.05785e-05	1.64979e-09	4.27641e-12	0.428742	1	0	0	0	0	1	0	0	1	0	12.2018	10.32	8.0708	38.6337	0	0	1	2.07143	1	5.9697	0	0	0	0	0	0	0	1	0	1	0	0	0	1	0
2.05689	9	6	15	82	9	82	6	82	82	0.0386711	0.0500032	2.0891e-08	1.84899e-09	0.0886743	0	0	0	0	0	0	0	0	1	15.7041	8.55046	0	8.40708	34.5188	0	0	1	-1.85714	0	0	0	0	0	0	0	0	1	1	0	0	0	0	0	0	0
0.977532	7	2	9	7	81	81	2	81	81	0.0128201	0.0142614	1.02873e-07	7.01816e-10	0.0270817	0	0	0	0	1	1	0	0	1	0	11.8165	9.904	8.61062	30.3311	0	0	0	0	0	0	0	0	0	0	0	0	1	1	1	1	0	0	0	1	0
0.940776	9	18	27	9	81	81	81	81	18	0.0131104	0.00159581	2.17198e-06	5.46532e-07	0.014709	0	0	0	0	0	0	0	0	2	6.47959	0	8.368	9.75221	24.5998	0	0	0	0	0	0	0	0	0	0	0	0	1	1	0	1	0	0	0	0	0
0.855613	13	12	25	82	82	12	82	82	13	0.00106397	0.00469226	1.41847e-08	9.45019e-07	0.00575719	0	0	0	0	0	0	0	0	1	6.22449	7.44037	8.376	0	27.2075	1	5.16667	0	0	0	0	0	0	0	0	0	0	1	1	1	1	0	0	0	0	0
0.582653	1	13	14	81	1	81	81	13	81	0.656152	0.0357375	1.61926e-12	4.48152e-05	0.691935	0	0	0	0	0	0	0	0	1	5.53061	6.77064	0	8.41593	28.3886	0	0	1	-7.67143	0	0	0	0	0	0	0	0	1	1	0	0	0	0	0	0	0
1.10179	12	13	25	12	81	81	81	81	13	0.0598376	0.000307738	5.59844e-07	5.30108e-07	0.0601465	0	0	0	0	0	0	0	0	1	6.22449	0	7.776	9.73451	31.332	0	0	0	0	0	0	1	7.59701	0	0	0	0	0	1	0	0	0	0	0	0	0
0.704412	2	15	17	82	2	82	15	82	82	0.0720353	0.000430334	9.84188e-11	1.20152e-08	0.0724656	0	0	0	1	0	0	0	0	1	15.551	5.11009	0	9.75221	30.4133	0	0	0	0	0	0	0	0	0	0	0	0	1	1	0	0	0	0	0	1	0
2.42531	15	10	25	82	10	82	82	15	82	0.0354819	0.416583	1.10524e-08	3.93376e-07	0.452066	1	0	0	0	0	0	0	0	1	12.3061	5.02752	0	10.2566	27.5902	0	0	0	0	0	0	0	0	0	0	0	0	1	1	1	0	0	0	0	0	0
0.966644	10	7	17	82	7	82	82	82	10	0.562004	0.322648	3.42118e-07	1.59829e-07	0.884653	0	0	0	0	0	0	0	0	1	8.10204	10.5413	9.904	0	45.3611	0	0	0	0	0	0	0	0	2	16.8137	0	0	1	0	1	0	0	0	1	0	0
0.942129	2	12	14	81	81	81	2	12	81	0.967694	0.0310562	8.16105e-13	2.52616e-11	0.99875	1	0	1	1	0	0	0	0	1	10.7245	13.8073	0	9.76106	47.7814	0	0	1	-4.05714	0	0	0	0	1	9.43137	0	0	1	1	1	1	0	0	0	0	0
1.06914	1	5	6	81	81	1	81	81	5	0.756536	0.0114325	6.83785e-06	4.03204e-07	0.767976	1	0	1	1	0	0	1	0	1	8.90816	5.12844	7.336	0	24.9332	1	3.56061	0	0	0	0	0	0	0	0	0	0	0	0	0	1	0	0	0	0	0
1.44157	5	14	19	5	81	14	81	81	81	0.0308741	0.000583732	8.07827e-07	2.27902e-11	0.0314587	1	0	1	0	1	0	1	0	1	0	8.48624	8.088	10.4336	27.0078	0	0	0	0	0	0	0	0	0	0	0	0	1	1	1	1	0	0	0	1	0
0.922254	15	11	26	81	11	15	81	81	81	0.0043167	0.000678647	3.90503e-09	5.60412e-08	0.00499541	0	0	0	0	0	0	0	0	1	15.551	7.06422	8.648	0	32.7061	0	0	1	1.44286	0	0	0	0	0	0	0	0	1	1	0	0	0	0	1	0	0
1.03282	2	17	19	82	82	17	82	82	2	1.02928	0.0236347	6.77713e-08	1.01524e-06	1.05291	0	0	0	0	0	0	0	0	1	15.551	11.6055	7.712	0	38.5542	0	0	1	-3.68571	0	0	0	0	0	0	0	0	0	0	0	0	0	0	0	0	0
33.2179	1	9	10	1	82	9	82	82	82	0.00016555	0.339322	1.5187e-10	3.28725e-07	0.339487	0	0	0	0	0	0	0	0	1	0	11.2752	8.912	8.0885	36.5294	0	0	0	0	0	0	1	8.25373	0	0	0	0	1	1	0	1	0	0	0	0	0
1.38919	14	15	29	82	14	82	15	82	82	0.326864	0.288607	1.23016e-09	1.20518e-05	0.615484	0	0	0	0	0	0	0	0	1	9.21429	11.8165	0	7.86726	50.5207	0	0	1	-6.97143	0	0	0	0	1	8.12745	1	6.52381	0	1	0	1	0	0	0	0	0
0.944285	10	20	30	81	10	81	81	20	81	0.20106	0.0057524	1.79374e-10	3.80122e-09	0.206812	0	0	0	0	0	0	0	0	1	5.58163	9.2844	0	7.76991	41.0183	0	0	0	0	0	0	0	0	2	18.3823	0	0	0	0	1	1	0	0	0	0	0
0.981246	20	15	35	82	82	82	15	20	82	0.746378	0.0744305	4.50647e-14	7.02104e-11	0.820809	0	0	0	0	0	0	0	0	1	6.78571	10.211	0	8.27434	41.9867	0	0	0	0	0	0	0	0	2	16.7157	0	0	1	1	1	0	0	0	0	0	0
0.870867	1	1	2	81	1	81	81	1	81	0.0123754	0.0133225	6.66505e-12	1.36546e-06	0.0256993	0	0	1	0	0	0	0	0	1	9.80612	7.84404	0	8.58407	26.2342	0	0	0	0	0	0	0	0	0	0	0	0	1	0	0	0	0	0	0	0	0
0.993191	12	7	19	82	12	82	82	82	7	0.00944157	0.000763881	1.1799e-09	3.53116e-09	0.0102055	0	1	0	0	0	0	0	0	1	5.54082	9.2844	7.944	0	30.279	0	0	0	0	0	0	0	0	1	7.5098	0	0	1	1	1	1	0	0	0	0	0
0.815293	16	15	31	82	16	15	82	82	82	0.030169	0.0136869	7.54809e-11	1.7186e-08	0.0438559	0	1	1	0	0	0	0	0	1	7.5	11.6055	10.32	0	29.4255	0	0	0	0	0	0	0	0	0	0	0	0	0	1	0	1	0	0	0	0	0
2.26778	7	16	23	82	7	16	82	82	82	0.000910917	0.000433037	4.35402e-07	3.3714e-10	0.00134439	0	0	0	0	0	0	0	0	1	10.1939	10.3028	8.808	0	29.3047	0	0	0	0	0	0	0	0	0	0	0	0	0	1	0	0	0	0	0	0	0
2.42256	12	9	21	82	9	82	12	82	82	0.280702	0.0167912	1.55284e-09	7.127e-08	0.297493	0	0	0	0	0	1	0	0	2	10.1939	15.7064	0	8.61062	34.5109	0	0	0	0	0	0	0	0	0	0	0	0	1	1	0	1	0	0	0	0	0
1.38046	9	5	14	81	9	5	81	81	81	3.25179e-05	0.00148838	1.39854e-06	3.9997e-11	0.0015223	0	0	1	0	1	1	0	0	2	5.62245	8.40367	7.232	0	21.2581	0	0	0	0	0	0	0	0	0	0	0	0	1	1	0	1	0	0	0	1	0
1.15899	7	6	13	82	82	6	82	82	7	0.0236264	0.000179972	3.55065e-06	1.9694e-09	0.02381	0	0	1	0	0	0	0	0	1	13.6327	5.94495	7.824	0	27.4017	0	0	0	0	0	0	0	0	0	0	0	0	0	0	1	1	0	0	0	1	0
2.57253	10	8	18	81	8	81	81	81	10	0.0303219	0.0432954	1.83957e-07	2.42877e-08	0.0736174	0	0	1	0	0	0	0	0	1	8.90816	8.86239	7.712	0	25.4825	0	0	0	0	0	0	0	0	0	0	0	0	1	1	0	1	0	0	0	0	0
1.57574	3	4	7	3	81	81	81	4	81	0.424676	0.000713503	1.27006e-07	1.91985e-07	0.42539	0	0	0	0	1	1	0	0	2	8.11224	0	7.776	9.75221	25.6405	0	0	0	0	0	0	0	0	0	0	0	0	1	0	1	0	0	0	0	0	0
1.54318	4	10	14	81	10	81	81	81	4	0.392445	0.000179749	6.43673e-09	3.90613e-09	0.392624	0	0	1	0	0	1	0	0	1	6.67347	10.4128	7.824	0	38.8388	0	0	2	-13.9286	0	0	0	0	0	0	0	0	1	0	0	1	0	0	0	1	0
3.45656	3	15	18	81	3	81	81	15	81	0.0335906	0.015857	1.15585e-08	2.01568e-07	0.0494478	0	0	1	0	0	0	0	0	1	7.92857	15.7064	0	10.4336	46.0681	0	0	1	-2.25714	1	9.74242	0	0	0	0	0	0	1	0	0	1	0	0	1	1	0
3.30357	4	4	8	4	82	82	82	4	82	0.0028438	0.00804544	1.31627e-09	3.30525e-10	0.0108892	1	0	0	0	0	0	0	0	2	8.2551	0	12.832	7.76991	70.3932	0	0	0	0	2	13.2121	1	12.0299	2	16.2941	0	0	1	1	0	0	0	0	0	0	0
1.09572	3	7	10	81	3	7	81	81	81	0.396952	0.00911166	5.40644e-12	7.28311e-09	0.406064	1	0	0	0	0	0	0	0	2	6.09184	9.2844	11.632	0	27.0082	0	0	0	0	0	0	0	0	0	0	0	0	1	1	0	1	0	0	0	0	0
5.42529	2	4	6	81	4	81	81	81	2	0.610141	0.273575	4.15551e-14	4.84992e-09	0.883716	1	0	0	0	0	0	0	0	2	5.37755	9.70642	8.912	0	31.2001	0	0	0	0	0	0	0	0	0	0	1	7.20408	1	1	0	1	0	0	0	0	0
1.94441	12	4	16	81	4	81	81	12	81	0.00752993	0.00344594	9.36016e-09	7.47026e-06	0.0109834	0	0	0	0	0	0	0	0	1	12.3061	8.48624	0	8.56637	29.3587	0	0	0	0	0	0	0	0	0	0	0	0	1	0	0	0	0	0	0	0	0
1.44754	4	1	5	81	81	81	81	4	1	0.0306829	0.000255779	1.18224e-09	1.457e-07	0.0309388	0	0	0	0	0	0	0	0	2	10.1837	0	7.192	9.73451	30.2466	1	3.13636	0	0	0	0	0	0	0	0	0	0	1	1	0	0	0	0	0	0	0
1.18328	1	11	12	81	11	81	81	1	81	0.00105444	0.000386812	3.25744e-09	2.10824e-12	0.00144126	1	0	1	0	0	1	0	0	1	14.0816	12.6606	0	8.61062	35.3528	0	0	0	0	0	0	0	0	0	0	0	0	1	1	0	0	0	0	0	0	0
4.12717	1	14	15	1	81	81	81	14	81	0.326332	0.00906847	5.54879e-06	1.24269e-08	0.335406	1	0	0	0	0	0	0	0	2	9.54082	0	8.912	8.27434	35.3056	0	0	0	0	0	0	0	0	1	8.57843	0	0	1	1	1	1	0	0	0	0	0
6.62224	14	4	18	82	82	14	4	82	82	0.144508	0.000232589	6.84618e-06	2.95067e-07	0.144748	0	0	0	0	0	0	0	0	1	0	5.3578	10.32	8.43363	38.3704	0	0	0	0	1	6.34848	1	7.91045	0	0	0	0	0	1	1	0	0	0	0	0	0
1.82503	6	1	7	1	81	81	81	6	81	1.04087	0.332275	5.00954e-10	1.43363e-09	1.37314	0	0	0	0	0	0	0	0	1	12.3061	0	7.608	10.4336	30.3477	0	0	0	0	0	0	0	0	0	0	0	0	1	1	0	0	0	0	0	0	0
2.75326	11	9	20	81	9	11	81	81	81	0.0124741	0.00247102	1.59548e-09	9.19341e-07	0.014946	0	0	1	0	0	0	0	0	1	12.0102	8.3578	8.648	0	31.8731	0	0	1	-2.85714	0	0	0	0	0	0	0	0	1	1	0	1	0	0	0	0	0
3.41623	8	1	9	1	81	8	81	81	81	1.35845e-05	1.23826e-07	6.02038e-09	6.71022e-10	1.3715e-05	0	0	1	1	0	1	0	0	3	0	15.578	9.592	7.89381	33.0638	0	0	0	0	0	0	0	0	0	0	0	0	0	1	0	1	0	0	0	0	0
1.32817	20	18	38	81	18	81	20	81	81	0.0355073	0.000598715	1.26087e-09	7.89286e-10	0.036106	0	0	0	0	1	1	1	0	1	14.0816	5.3578	0	8.40708	34.5267	0	0	0	0	0	0	0	0	0	0	1	6.68027	0	0	1	1	0	0	0	1	0
1.56926	6	18	24	81	18	81	81	6	81	1.85505	7.64588e-05	2.06e-07	1.75653e-09	1.85513	0	0	1	0	0	0	0	0	1	15.551	10.0459	0	8.76991	34.3668	0	0	0	0	0	0	0	0	0	0	0	0	0	1	0	0	0	0	0	0	0
10.8978	19	18	37	81	81	81	81	19	18	0.00181548	0.00191006	3.18897e-10	4.85193e-05	0.00377405	0	0	0	0	0	0	0	0	2	10.1939	0	10.88	8.58407	38.6125	0	0	0	0	1	8.95455	0	0	0	0	0	0	1	0	0	0	0	0	0	0	0
0.943617	15	1	16	81	81	81	1	15	81	0.00050988	0.0134227	3.58087e-09	1.57862e-07	0.0139327	0	0	0	0	0	0	0	0	1	10.7245	7.44037	0	8.09735	26.2622	0	0	0	0	0	0	0	0	0	0	0	0	1	1	1	0	0	0	0	1	0
0.950566	2	2	4	81	2	81	81	2	81	0.872186	0.0200329	1.59169e-09	4.8094e-11	0.892219	0	0	0	0	0	0	0	0	1	15.551	4.95413	0	8.40708	28.9122	0	0	0	0	0	0	0	0	0	0	0	0	1	1	1	1	0	0	0	0	0
0.929139	12	17	29	82	82	82	17	12	82	0.157203	0.292172	1.47919e-10	6.75259e-07	0.449376	1	0	0	0	0	0	0	0	1	11.4592	5.01835	0	9.76106	26.2386	0	0	0	0	0	0	0	0	0	0	0	0	1	1	0	0	0	0	0	0	0
4.44591	16	7	23	82	7	82	16	82	82	0.709054	0.000759544	1.8001e-14	3.25215e-09	0.709813	0	0	1	0	0	0	0	0	3	15.7041	10.1743	0	10.2301	36.1085	0	0	0	0	0	0	0	0	0	0	0	0	1	1	0	1	0	0	0	0	0
0.882012	9	9	18	81	9	81	81	9	81	0.101599	0.417747	1.09677e-08	7.6163e-07	0.519347	0	0	0	0	1	1	1	0	1	7.28571	5.08257	0	8.58407	25.4952	0	0	1	4.54286	0	0	0	0	0	0	0	0	1	1	0	0	0	0	0	1	0
0.855289	5	17	22	82	82	82	82	17	5	0.969434	8.66949e-05	3.98397e-09	4.74497e-09	0.969521	0	0	1	0	0	0	0	0	1	7.18367	0	7.416	8.43363	46.2342	0	0	0	0	0	0	2	14.3284	1	8.87255	0	0	0	1	0	1	0	0	0	0	0
0.945967	4	13	17	82	82	13	82	82	4	1.66299	0.0152338	4.67404e-08	2.76211e-07	1.67822	0	0	1	0	0	0	0	0	1	6.09184	6.84404	7.864	0	28.6506	0	0	0	0	0	0	1	7.85075	0	0	0	0	1	1	1	1	0	0	0	0	0
2.43535	17	18	35	82	18	82	17	82	82	0.90791	0.000403864	1.27965e-11	5.97799e-06	0.90832	0	1	0	0	0	0	0	0	1	9.84694	8.06422	0	8.59292	48.8914	0	0	0	0	1	10.9545	1	11.4328	0	0	0	0	1	0	0	0	0	0	0	0	0
6.49896	15	9	24	9	82	82	15	82	82	0.0335602	0.0172999	6.08004e-11	2.82724e-09	0.0508601	0	0	0	0	0	0	0	0	2	0	5.57798	12.832	10.2478	37.0011	0	0	0	0	0	0	1	8.34328	0	0	0	0	1	0	0	1	0	0	0	0	0
1.93195	17	12	29	82	17	82	12	82	82	1.50423	0.000392227	1.62983e-08	1.26844e-05	1.50463	0	0	0	0	0	0	0	0	1	9.84694	5.95413	0	8.0885	26.2896	0	0	1	-2.4	0	0	0	0	0	0	0	0	1	1	0	1	0	0	0	0	0
1.88279	16	14	30	81	81	14	81	81	16	0.0722552	0.152527	7.56591e-07	5.3348e-10	0.224783	1	0	0	0	1	1	1	0	1	10.0408	15.578	7.52	0	40.5408	0	0	0	0	0	0	0	0	1	7.40196	0	0	1	1	0	1	0	0	0	1	0
1.003	6	15	21	82	15	82	82	6	82	0.00462393	0.200901	3.80087e-08	5.62248e-07	0.205525	0	1	0	0	0	0	0	1	1	10.949	6.65138	0	8.0885	32.9317	0	0	1	-7.24286	0	0	0	0	0	0	0	0	1	1	0	0	0	0	0	0	0
0.735338	5	8	13	8	81	81	81	81	5	0.00885277	0.14528	8.23163e-07	2.64427e-08	0.154134	1	0	0	0	1	1	1	0	1	5.35714	0	7.896	7.76991	21.0231	0	0	0	0	0	0	0	0	0	0	0	0	1	1	1	1	0	0	0	1	0
0.885003	11	5	16	11	82	82	5	82	82	1.40493	0.0655548	9.91023e-10	2.80253e-08	1.47049	1	0	0	0	1	1	1	0	1	0	7.87156	7.208	9.75221	33.6045	1	8.77273	0	0	0	0	0	0	0	0	0	0	1	1	1	0	0	0	0	1	0
2.0369	20	17	37	82	82	82	17	20	82	1.3101	0.000366705	1.48411e-07	2.10083e-07	1.31047	0	0	0	0	0	0	0	0	1	5.57143	8.02752	0	8.0708	53.0294	0	0	0	0	1	9.21212	1	13.0299	1	9.11765	0	0	1	1	0	0	0	0	0	0	0
2.58579	1	4	5	1	81	81	81	4	81	0.024566	0.000302646	2.89136e-06	8.6909e-10	0.0248715	0	0	0	0	0	0	0	0	2	10	0	9.592	7.86726	34.9667	0	0	0	0	0	0	1	7.50746	0	0	0	0	1	0	0	0	0	0	0	0	0
1.90322	14	18	32	81	81	81	14	18	81	0.838512	0.000366587	2.07819e-07	1.21307e-07	0.838879	0	0	0	0	1	1	1	0	1	8.7551	5.48624	0	10.2478	24.4891	0	0	0	0	0	0	0	0	0	0	0	0	1	1	0	0	0	1	1	1	1
1.13893	8	16	24	81	81	8	81	81	16	0.00245715	5.59291e-05	2.2917e-07	3.52018e-08	0.00251334	0	0	1	0	0	0	0	0	1	8.94898	13.8073	9.68	0	33.5791	0	0	1	1.14286	0	0	0	0	0	0	0	0	1	1	0	0	0	0	0	0	0
0.801088	14	4	18	4	82	82	14	82	82	0.329867	0.405212	9.95445e-14	2.2952e-06	0.735082	0	0	0	0	1	1	0	0	1	0	8.65138	8.368	10.2301	44.3475	0	0	0	0	0	0	0	0	2	17.098	0	0	0	1	0	0	0	1	1	1	1
1.11016	1	5	6	81	1	81	5	81	81	0.616962	0.00173773	8.05771e-08	3.03579e-06	0.618702	1	0	0	0	0	1	0	0	1	11.4286	7.25688	0	8.27434	26.9598	0	0	0	0	0	0	0	0	0	0	0	0	1	1	0	0	0	0	0	1	0
1.77537	3	6	9	82	3	82	82	6	82	0.0248071	6.45559e-05	5.50678e-11	2.73412e-08	0.0248717	0	0	1	0	0	0	0	0	1	12.0102	5.93578	0	10.4336	28.3796	0	0	0	0	0	0	0	0	0	0	0	0	0	1	1	0	0	0	0	0	0
1.06357	9	11	20	81	9	81	81	11	81	0.000159337	1.0254e-05	1.3118e-14	4.58965e-11	0.000169591	0	0	1	0	0	0	0	0	1	7.28571	11.1376	0	8.0708	31.6305	1	5.13636	0	0	0	0	0	0	0	0	0	0	1	1	1	0	0	0	0	1	0
2.1736	18	3	21	82	18	3	82	82	82	1.40141	0.00324648	4.90402e-09	9.4568e-08	1.40466	1	0	0	0	1	1	1	0	2	11.2755	7.84404	9.44	0	54.8491	0	0	0	0	1	6.77273	1	7.07463	0	0	1	12.4422	1	1	0	1	0	0	0	1	0
0.577561	11	19	30	11	82	82	82	19	82	1.96728	0.000169068	5.6676e-09	1.67414e-05	1.96746	0	0	1	0	0	0	0	0	1	6.41837	0	12.832	8.0708	35.3996	0	0	0	0	0	0	0	0	1	8.07843	0	0	1	1	0	0	0	0	0	0	0
3.05943	4	17	21	82	82	17	82	82	4	0.0343126	0.000369729	1.7957e-05	5.87077e-07	0.0347009	0	0	1	0	0	0	0	0	1	12.3469	9.92661	8.432	0	48.6831	0	0	1	-5.95714	0	0	0	0	0	0	1	12.0204	1	1	0	0	0	0	0	0	0
0.734695	20	20	40	81	81	20	81	81	20	0.966659	0.00328218	6.37099e-11	1.04524e-06	0.969942	0	0	0	0	0	0	0	0	1	6.26531	7.38532	7.712	0	25.5769	0	0	1	-4.21429	0	0	0	0	0	0	0	0	0	1	0	0	0	0	0	0	0
2.80084	8	14	22	81	8	81	14	81	81	0.0322723	0.000411758	7.26203e-12	2.05417e-06	0.0326861	0	0	0	0	0	0	0	0	1	13.6327	10.4128	0	8.59292	49.0859	0	0	0	0	1	7.65152	0	0	0	0	1	8.79592	1	0	0	0	0	0	0	0	0
11.0145	3	1	4	1	82	3	82	82	82	0.40741	0.0265827	4.22641e-10	1.28768e-06	0.433994	0	0	0	0	0	0	0	0	4	0	5.02752	8.808	8.40708	85.3486	0	0	0	0	0	0	0	0	6	54.9019	1	8.20408	1	0	0	1	0	0	0	1	0
0.96288	20	19	39	82	20	82	82	82	19	0.022909	0.00054515	2.25088e-06	4.83347e-08	0.0234565	1	1	1	0	1	0	1	0	1	13.0204	7.01835	12.832	0	45.9932	0	0	0	0	0	0	0	0	0	0	2	13.1225	1	1	1	0	0	0	0	1	0
4.8139	10	8	18	81	8	10	81	81	81	0.00594876	0.0140475	2.82987e-07	8.40115e-10	0.0199966	1	0	0	0	1	1	1	0	1	10.1939	9.92661	12.832	0	39.604	0	0	0	0	1	6.65152	0	0	0	0	0	0	1	1	0	1	0	0	0	1	0
1.05891	18	3	21	82	82	3	82	82	18	0.122021	0.0190965	8.50846e-09	4.18082e-10	0.141118	0	0	0	0	1	1	0	0	1	15.551	6.89908	9.904	0	59.9952	1	5.57576	1	-4.15714	1	7.84848	1	10.0597	0	0	0	0	0	1	0	0	0	1	1	1	1
1.01711	9	17	26	81	9	81	81	17	81	0.0213764	0.0022333	1.11199e-09	4.62078e-07	0.0236101	1	0	0	0	1	1	0	0	1	10.949	5	0	8.0708	38.4783	0	0	1	-7.2	0	0	0	0	0	0	1	7.2585	1	1	0	0	0	0	0	1	0
1.11021	4	13	17	82	4	13	82	82	82	0.000968612	0.00364398	1.83659e-06	9.82149e-09	0.00461444	0	0	1	0	0	0	0	0	1	7.5	15.578	7.336	0	30.414	0	0	0	0	0	0	0	0	0	0	0	0	1	0	1	0	0	0	0	0	0
0.923102	6	17	23	17	81	81	81	81	6	0.646654	0.301932	9.50719e-08	1.72744e-12	0.948586	1	1	1	1	0	0	0	0	1	14.0816	0	7.952	7.86726	55.9702	0	0	1	-5.57143	1	5.34848	1	7.07463	0	0	1	8.07483	1	1	1	0	0	0	0	1	0
1.30167	11	13	24	81	11	81	81	13	81	0.00970352	0.000270167	2.32239e-08	7.4356e-11	0.00997371	0	0	0	0	0	0	0	0	1	15.551	12.3303	0	8.61062	44.286	0	0	0	0	0	0	0	0	1	7.79412	0	0	1	1	0	1	0	0	0	0	0
0.727938	1	9	10	81	9	81	81	1	81	0.00370205	1.32299e-05	3.05608e-09	5.6759e-08	0.00371534	1	0	0	0	1	1	1	0	1	8.11224	8.86239	0	8.0885	32.106	0	0	1	-7.04286	0	0	0	0	0	0	0	0	1	1	0	1	0	0	0	1	0
0.694453	11	11	22	82	82	82	82	11	11	0.000252245	0.135103	2.16004e-09	2.51508e-09	0.135355	0	0	0	0	0	0	0	0	2	8.12245	0	12.832	8.0531	35.0361	0	0	1	-6.02857	0	0	0	0	0	0	0	0	1	1	1	1	0	0	0	0	0
1.11084	2	10	12	81	2	81	81	81	10	0.811137	0.00574425	4.55624e-11	1.02724e-10	0.816881	1	0	1	0	0	0	0	0	1	8.7551	5.46789	7.52	0	31.6858	0	0	1	9.94286	0	0	0	0	0	0	0	0	0	0	0	1	0	0	0	0	0
3.56805	11	19	30	11	82	82	82	19	82	0.0368446	2.33946e-05	7.99008e-08	9.87118e-08	0.0368682	0	0	0	0	0	0	0	0	1	13.6327	0	9	10.4159	33.0486	0	0	0	0	0	0	0	0	0	0	0	0	1	1	1	0	0	0	0	0	0
1.40132	3	17	20	81	17	81	81	3	81	0.0596519	0.0965301	4.82833e-10	3.15434e-06	0.156185	1	0	1	0	1	1	0	0	1	10.0816	9.79817	0	8.56637	38.0858	0	0	1	-1.71429	0	0	1	7.92537	0	0	0	0	1	1	0	0	0	0	0	1	0
0.751252	1	9	10	81	1	9	81	81	81	0.000230035	0.00472116	1.67617e-05	9.614e-12	0.00496796	0	0	0	0	1	0	0	0	1	9.84694	5.93578	7.232	0	29.2874	0	0	0	0	1	6.27273	0	0	0	0	0	0	1	1	0	0	0	1	1	0	1
0.765287	14	5	19	82	5	82	14	82	82	0.0136008	0.00780206	9.35678e-10	1.56583e-09	0.0214029	0	0	1	0	0	0	0	0	1	5.5	7.87156	0	9.76106	23.1326	0	0	0	0	0	0	0	0	0	0	0	0	0	0	0	0	0	0	0	0	0
1.6503	13	5	18	81	5	13	81	81	81	0.32419	2.81866e-05	4.20775e-08	2.21968e-10	0.324218	1	0	1	1	0	0	1	0	1	12.0102	5.56881	8.12	0	49.3314	0	0	0	0	0	0	1	8.38806	1	8.93137	1	6.31293	0	1	0	0	0	0	0	0	0
2.21804	12	4	16	81	12	4	81	81	81	0.121677	0.0397353	3.03021e-13	2.03227e-05	0.161433	0	0	0	0	0	0	0	0	1	15.7041	6.78899	11.632	0	34.1251	0	0	0	0	0	0	0	0	0	0	0	0	1	1	0	0	0	0	0	0	0
0.887887	2	2	4	2	82	82	2	82	82	4.48479e-05	0.0132914	9.07418e-07	4.33566e-11	0.0133372	1	0	0	1	0	0	0	0	1	0	4.90826	7.952	8.56637	21.4266	0	0	0	0	0	0	0	0	0	0	0	0	1	1	1	1	0	0	0	0	0
1.807	18	19	37	82	82	18	82	82	19	0.390291	0.000630571	2.15733e-09	2.72409e-08	0.390922	0	0	0	0	0	0	0	0	2	15.551	8.49541	7.336	0	63.2087	0	0	0	0	2	13.303	1	11.2239	0	0	1	7.29932	1	1	0	0	0	0	0	0	0
0.805714	3	9	12	81	3	81	81	9	81	0.206193	0.012186	5.6807e-07	2.88825e-06	0.218383	1	0	0	0	1	1	1	0	1	10.7245	7.78899	0	8.09735	28.2537	0	0	1	1.64286	0	0	0	0	0	0	0	0	1	1	1	0	0	0	0	1	0
0.923472	1	1	2	81	81	81	1	1	81	0.00642308	0.00068326	1.12235e-08	1.82341e-06	0.00710817	0	0	0	0	0	0	0	0	1	8.7551	4.95413	0	9.93805	37.9105	0	0	1	-6.52857	0	0	0	0	0	0	1	7.73469	1	1	1	1	0	0	0	0	0
0.819452	13	1	14	81	81	13	81	81	1	0.00228944	0.00025949	8.15482e-06	7.23656e-07	0.00255781	0	0	0	0	0	0	0	0	1	8.10204	11.8257	9.904	0	64.0034	0	0	0	0	0	0	0	0	2	26.2941	1	7.87755	1	0	0	0	0	0	0	0	0
0.954487	3	6	9	82	6	82	82	3	82	0.795568	0.000144488	8.73972e-06	3.54438e-06	0.795725	1	0	0	0	0	0	0	0	2	8.78571	6.55046	0	9.93805	41.7162	0	0	1	-6.47143	0	0	0	0	1	9.97059	0	0	1	1	0	0	0	0	0	0	0
0.856973	15	14	29	82	82	82	14	15	82	0.293077	0.234391	9.29253e-08	4.99352e-08	0.527468	0	0	0	0	0	0	0	0	1	8.7551	12.2477	0	8.42478	43.9133	2	7.5	2	-6.98571	0	0	0	0	0	0	0	0	1	1	0	1	1	0	0	0	0
1.1363	3	19	22	81	3	81	81	19	81	0.0941845	0.0122029	3.12329e-07	1.25898e-06	0.106389	0	0	0	0	0	0	0	0	1	9.62245	9.70642	0	8.40708	62.3521	2	16.2121	0	0	0	0	1	9.80597	1	8.59804	0	0	1	0	1	1	0	0	0	0	0
1.35006	2	17	19	82	2	82	82	17	82	0.983006	0.000660479	7.42297e-12	5.98133e-10	0.983667	0	0	1	0	0	0	0	0	1	8.78571	15.9541	0	10.4159	52.1738	1	3.59091	1	-5.82857	0	0	0	0	0	0	1	7.59864	1	1	0	0	0	0	0	0	0
0.560001	1	6	7	6	81	81	81	1	81	0.0849682	0.00501829	2.37511e-06	3.42542e-10	0.0899888	0	0	0	0	0	0	0	0	1	8.17347	0	9.56	10.2389	41.1976	0	0	0	0	1	6.09091	1	7.13433	0	0	0	0	1	0	0	0	0	0	0	0	0
3.83591	1	2	3	1	81	81	81	2	81	0.482655	1.05346e-06	6.95539e-11	5.73811e-08	0.482656	0	0	1	0	0	0	0	0	1	10.6837	0	10.32	8.75221	59.3912	0	0	1	-6.4	0	0	0	0	3	23.2353	0	0	1	1	0	1	0	0	0	0	0
1.06236	12	14	26	81	81	81	14	12	81	0.00235684	0.242599	6.7033e-08	1.88154e-07	0.244956	0	0	1	0	0	0	0	0	1	12.1531	8.86239	0	8.0708	33.8742	1	4.78788	0	0	0	0	0	0	0	0	0	0	1	0	0	0	0	0	0	0	0
1.26899	8	4	12	81	81	81	8	4	81	0.869162	0.000295346	1.84682e-10	1.23936e-07	0.869458	1	0	1	0	0	0	0	0	2	5.62245	8.27523	0	7.88496	21.7826	0	0	0	0	0	0	0	0	0	0	0	0	1	1	0	0	0	0	0	0	0
1.04321	1	8	9	82	1	8	82	82	82	0.311414	0.0301782	7.52335e-06	1.23602e-06	0.341601	0	1	1	0	0	0	0	0	1	9.35714	7.06422	7.952	0	33.2526	1	3.63636	2	-5.24285	0	0	0	0	0	0	0	0	0	0	0	1	0	0	0	0	0
0.869061	8	10	18	81	8	81	81	10	81	0.0739207	0.293727	3.11225e-12	6.48754e-09	0.367648	0	0	1	0	1	0	1	0	1	10.949	13.6789	0	9.92035	34.5483	0	0	0	0	0	0	0	0	0	0	0	0	1	1	1	1	0	0	0	0	0
1.54435	8	8	16	81	81	81	8	8	81	0.483247	0.00102256	5.66713e-13	1.67548e-07	0.484269	1	0	1	0	0	0	1	0	2	8.03061	12.6239	0	10.4159	36.4795	1	5.40909	0	0	0	0	0	0	0	0	0	0	1	1	0	1	0	0	0	1	0
0.84725	13	17	30	82	82	13	17	82	82	0.0952836	0.298096	2.39385e-09	1.74302e-05	0.393397	0	1	0	0	0	0	0	0	1	0	5.57798	7.776	7.76991	57.5338	0	0	0	0	0	0	1	8.52239	2	16.5882	1	11.2993	1	0	0	0	0	0	0	0	0
0.991841	13	13	26	13	82	82	82	82	13	0.000416828	0.000445629	3.31413e-09	1.07032e-05	0.000873163	0	0	0	0	0	1	0	0	1	6.26531	0	7.776	8.76991	32.233	0	0	0	0	0	0	0	0	0	0	1	9.42177	1	0	0	0	0	0	0	1	0
2.50609	8	11	19	82	82	82	8	11	82	0.287966	0.000384741	2.0794e-06	2.48265e-11	0.288353	1	0	0	0	0	1	0	0	1	9.45918	11.6055	0	9.73451	32.2992	0	0	2	1.5	0	0	0	0	0	0	0	0	1	0	1	1	0	0	0	0	0
0.811129	2	20	22	81	2	20	81	81	81	0.0446554	0.124453	1.65265e-12	1.27886e-06	0.16911	0	0	1	0	1	0	0	0	1	8.7449	7.82569	9.144	0	25.7146	0	0	0	0	0	0	0	0	0	0	0	0	1	1	0	0	0	0	1	0	0
2.26321	2	7	9	82	82	7	82	82	2	1.79995	0.0122155	4.13595e-08	4.46019e-09	1.81216	0	0	0	1	0	0	0	0	1	13.6327	8.27523	10.88	0	37.1667	1	4.37879	0	0	0	0	0	0	0	0	0	0	1	0	1	1	0	0	0	0	0
1.38993	8	15	23	15	81	81	81	8	81	0.00391602	0.0249847	5.83023e-09	7.48753e-09	0.0289007	1	0	1	0	0	1	0	0	1	5.5	0	7.896	10.2301	26.5832	0	0	1	-2.95714	0	0	0	0	0	0	0	0	1	1	1	0	0	0	0	1	0
1.15806	13	20	33	20	81	81	13	81	81	0.013295	0.00020197	1.63092e-08	6.95603e-07	0.0134977	0	0	1	1	0	0	0	0	2	0	5.97248	9.904	8.42478	56.049	0	0	1	-7.02857	0	0	2	16.2388	1	8.48039	0	0	1	1	1	0	0	0	0	0	0
0.933776	16	4	20	81	16	81	4	81	81	0.00969616	0.0364017	1.28616e-11	3.26643e-09	0.0460979	0	0	0	0	1	0	0	0	1	6.56122	9.2844	0	8.58407	31.6536	0	0	0	0	0	0	1	7.22388	0	0	0	0	1	0	0	0	0	1	1	1	1
1.23423	3	9	12	81	9	81	3	81	81	0.410633	0.164511	7.87066e-10	1.2381e-08	0.575144	0	0	0	0	1	0	0	0	1	15.551	8.40367	0	8.58407	32.5387	0	0	0	0	0	0	0	0	0	0	0	0	1	1	0	1	0	0	0	1	0
1.06704	2	19	21	82	82	2	82	82	19	1.39622	7.65949e-07	9.45084e-06	7.17272e-06	1.39624	0	0	1	0	0	0	0	0	1	15.7041	5.48624	9.68	0	30.8703	0	0	0	0	0	0	0	0	0	0	0	0	1	1	0	1	0	0	1	1	0
1.5189	1	16	17	82	1	82	82	16	82	0.438858	0.00690635	2.38582e-11	1.76408e-05	0.445782	1	0	1	1	0	0	0	0	2	11.6122	10.789	0	8.0531	65.6218	0	0	0	0	1	7.84848	1	10.7164	1	8.23529	1	8.36735	1	1	0	0	0	0	0	0	0
1.11768	2	19	21	82	2	82	82	82	19	1.09148	2.90329e-05	1.04447e-10	3.37823e-12	1.09151	0	0	0	0	1	1	1	0	1	8.90816	11.945	8.12	0	57.776	0	0	2	4.87143	0	0	0	0	3	23.9314	0	0	1	1	0	0	0	1	1	1	1
1.84222	4	10	14	82	82	4	10	82	82	0.0589599	0.000496248	1.31096e-08	8.85986e-07	0.0594571	0	0	1	0	0	0	0	0	1	0	7.13761	7.52	8.43363	56.7715	0	0	0	0	1	11.0152	1	15.2239	1	7.44118	0	0	1	1	0	0	0	0	0	0	0
6.89177	19	7	26	19	82	82	7	82	82	0.874019	0.00204799	1.04359e-10	2.25557e-06	0.87607	1	0	0	0	0	0	0	0	2	0	6.65138	10.76	9.76106	41.4105	0	0	0	0	0	0	0	0	0	0	2	14.2381	1	0	0	1	0	0	0	0	0
1.03759	18	4	22	4	82	82	82	18	82	0.113877	0.0134351	4.39147e-10	4.12821e-07	0.127313	1	0	0	0	0	1	0	0	1	5.82653	0	8.648	10.2301	24.7046	0	0	0	0	0	0	0	0	0	0	0	0	1	0	0	0	0	0	0	1	0
15.2536	16	8	24	82	82	82	82	8	16	0.000683222	0.00638077	4.9478e-10	6.33894e-07	0.00706463	1	0	0	0	0	0	0	0	1	6.32653	0	8.808	10.4159	44.4743	0	0	0	0	1	8.89394	1	10.0299	0	0	0	0	1	1	0	1	0	0	0	1	0
1.24523	4	20	24	81	4	81	81	81	20	0.404215	0.0180145	5.68095e-10	2.2448e-10	0.422229	0	1	1	0	1	1	0	0	2	5.37755	14.055	7.52	0	26.9525	0	0	0	0	0	0	0	0	0	0	0	0	1	1	0	0	0	0	0	1	0
0.978157	10	15	25	82	82	82	15	10	82	0.0325865	0.0132977	5.61548e-09	2.51769e-06	0.0458866	1	0	1	0	0	0	0	0	1	6.22449	4.88991	0	8.0708	19.1852	0	0	0	0	0	0	0	0	0	0	0	0	1	1	1	0	0	0	0	0	0
1.82244	4	20	24	81	20	81	4	81	81	0.64195	0.550674	4.96904e-11	8.24325e-09	1.19262	0	0	0	0	0	0	0	0	2	8.78571	8.68807	0	10.4159	35.8747	0	0	0	0	0	0	1	7.98507	0	0	0	0	1	1	0	1	0	0	0	0	0
0.976518	11	8	19	8	81	81	81	11	81	0.335068	0.000306926	3.55711e-06	4.93442e-10	0.335378	0	0	1	0	0	0	0	0	1	15.551	0	12.832	8.42478	44.4645	0	0	0	0	0	0	1	7.65672	0	0	0	0	1	1	0	0	0	0	0	0	0
30.0874	11	1	12	1	82	82	82	11	82	2.18456e-05	0.000158446	1.45957e-09	5.63433e-09	0.000180299	0	0	0	0	0	0	0	0	1	9.87755	0	12.832	8.0531	46.3523	0	0	0	0	0	0	0	0	1	7.63725	1	7.95238	1	1	0	1	0	0	0	0	0
0.933662	11	2	13	82	11	82	82	82	2	0.000924841	1.09615e-05	3.56019e-07	2.4918e-10	0.000936159	0	0	0	0	1	1	1	0	1	5.41837	6.3578	9.904	0	39.3406	1	7.12121	0	0	0	0	0	0	1	10.5392	0	0	1	1	0	0	0	0	0	1	0
1.28135	16	14	30	81	16	81	81	81	14	0.437132	0.00132641	1.18797e-07	6.12776e-08	0.438459	1	0	0	1	0	0	0	0	1	13.6327	4.79817	7.488	0	25.9189	0	0	0	0	0	0	0	0	0	0	0	0	1	0	0	1	0	0	0	1	0
1.70279	5	13	18	81	13	81	81	5	81	0.0214516	0.00069348	9.90585e-10	1.61848e-08	0.0221451	0	0	0	0	1	1	1	0	1	7.19388	8.05505	0	10.4336	33.3198	0	0	0	0	0	0	0	0	1	7.63725	0	0	0	1	1	1	0	0	0	1	0
0.980352	6	1	7	82	1	82	6	82	82	0.0920118	0.000371169	1.0698e-06	7.60543e-07	0.0923848	0	0	0	0	1	1	1	0	1	5.38776	6.45872	0	8.76991	28.8125	0	0	0	0	0	0	0	0	1	8.19608	0	0	1	1	1	0	0	0	0	1	0
1.05331	14	17	31	82	17	82	82	14	82	0.00361057	0.00992599	6.69222e-10	4.33171e-08	0.0135366	0	0	1	0	0	0	0	0	1	6.40816	8.89908	0	8.41593	40.2075	0	0	0	0	0	0	1	9.26866	1	7.21569	0	0	1	1	1	0	0	0	0	0	0
1.59478	8	17	25	82	8	17	82	82	82	0.00297334	9.07385e-05	7.35747e-09	1.63959e-06	0.00306573	0	0	1	1	0	1	0	0	1	13.6327	9.2844	7.952	0	30.8691	0	0	0	0	0	0	0	0	0	0	0	0	1	1	0	1	0	0	0	1	0
1.28635	20	9	29	82	82	82	20	9	82	0.870906	0.000401182	3.50385e-11	2.18592e-07	0.871307	0	0	1	1	0	0	0	0	1	9.66327	6.48624	0	7.87611	31.3688	0	0	0	0	0	0	0	0	1	7.34314	0	0	1	1	0	1	0	0	0	0	0
1.72106	9	1	10	81	9	81	81	1	81	0.588884	0.000196631	6.39302e-08	2.72901e-07	0.589081	0	0	0	0	0	0	0	0	1	7.28571	15.9541	0	8.76991	32.0097	0	0	0	0	0	0	0	0	0	0	0	0	1	1	0	0	0	0	0	0	0
1.11004	1	10	11	82	10	82	1	82	82	0.0159569	7.00102e-05	1.28706e-09	2.18405e-10	0.0160269	1	0	0	0	0	0	0	0	1	8.07143	7	0	9.74336	24.8148	0	0	0	0	0	0	0	0	0	0	0	0	1	0	0	1	0	0	0	0	0
3.64693	8	5	13	82	5	82	82	82	8	0.0846721	0.0114714	2.43856e-07	1.71969e-05	0.0961609	0	0	0	0	0	0	0	0	1	11.2857	9.2844	9.152	0	38.4982	0	0	0	0	0	0	1	8.77612	0	0	0	0	1	1	0	1	0	0	0	0	0
1.08455	10	4	14	81	10	81	81	4	81	0.0236477	0.00554428	7.10815e-09	9.46821e-08	0.0291921	0	0	1	0	0	0	0	0	1	6.2551	9.70642	0	8.61062	24.5721	0	0	0	0	0	0	0	0	0	0	0	0	1	1	0	0	0	0	0	0	0
0.83811	17	5	22	81	5	81	81	81	17	0.0205349	0.0255872	1.00504e-09	4.62661e-09	0.0461221	0	0	0	0	0	0	0	0	1	6.64286	5.11009	9.44	0	21.1929	0	0	0	0	0	0	0	0	0	0	0	0	0	1	0	1	0	0	0	0	0
2.02535	20	16	36	81	20	81	16	81	81	1.14305	0.260772	7.16475e-10	1.09394e-08	1.40383	1	0	1	0	0	0	0	0	1	13.6327	10.4128	0	9.73451	45.8861	0	0	0	0	1	12.1061	0	0	0	0	0	0	1	1	0	0	0	0	0	0	0
0.844315	3	7	10	81	81	81	7	3	81	0.00669222	0.00905704	8.88907e-08	1.22244e-05	0.0157616	0	0	0	0	0	0	0	0	1	5.82653	8.6789	0	8.57522	44.2657	0	0	1	-5.31429	0	0	0	0	1	9.33333	1	6.53741	0	1	0	0	1	0	0	0	0
0.797542	12	17	29	17	81	81	81	81	12	0.036424	0.00126856	7.70581e-06	1.26451e-05	0.0377129	0	0	1	0	0	0	0	0	1	5.42857	0	11.632	10.4336	46.8935	0	0	1	-4.01429	1	6.59091	0	0	1	8.79412	0	0	0	0	0	0	0	0	0	0	0
1.20182	16	6	22	81	6	81	16	81	81	0.317448	6.48222e-05	8.69641e-08	3.42444e-06	0.317516	1	0	0	0	1	1	1	0	2	7.7449	15.9541	0	7.76991	44.2475	1	5.0303	0	0	0	0	0	0	0	0	1	7.7483	1	1	0	0	0	0	0	1	0
1.40062	18	14	32	81	81	14	81	81	18	0.109826	0.037879	8.01827e-10	3.61341e-12	0.147705	0	0	0	0	1	1	1	0	1	5.41837	10.211	8.208	0	28.0192	1	4.18182	0	0	0	0	0	0	0	0	0	0	1	0	0	0	0	1	1	1	1
1.67096	2	15	17	15	81	81	2	81	81	2.35353e-05	0.00022434	2.65064e-08	6.90936e-08	0.000247971	1	0	0	0	1	1	0	0	1	0	7.18349	9.904	8.42478	41.0684	0	0	0	0	1	7.57576	0	0	1	7.98039	0	0	1	1	0	1	0	0	0	1	0
0.829359	11	4	15	82	82	4	82	82	11	0.000431145	0.000102642	8.93635e-09	1.88373e-11	0.000533796	1	0	1	0	1	1	1	0	1	9.62245	5.26606	9.56	0	46.6474	0	0	0	0	1	7.22727	1	7.91045	0	0	1	7.06122	1	1	0	1	0	0	0	1	0
1.33768	1	7	8	81	7	81	81	1	81	0.000870903	3.45427e-07	3.06402e-06	2.3407e-06	0.000876653	0	0	1	0	0	0	0	0	1	15.7041	8.55046	0	8.42478	32.6793	0	0	0	0	0	0	0	0	0	0	0	0	0	1	1	1	0	0	0	0	0
1.33875	3	10	13	82	82	82	10	3	82	0.0194219	0.152791	8.61216e-09	1.50803e-07	0.172213	0	0	0	0	1	1	1	0	1	13.4796	9.36697	0	7.89381	30.7404	0	0	0	0	0	0	0	0	0	0	0	0	0	1	1	1	0	0	0	1	0
1.14418	2	20	22	81	81	20	81	81	2	0.000588233	0.0371713	1.18732e-09	2.00197e-09	0.0377596	0	0	0	0	1	1	1	0	1	5.61224	6.77064	9.144	0	46.0438	3	13.7424	0	0	0	0	0	0	1	10.7745	0	0	1	1	1	0	0	1	1	1	1
1.03945	15	2	17	82	15	82	82	82	2	0.0347151	0.000195014	8.21122e-09	4.56942e-07	0.0349106	0	0	1	0	0	0	0	0	1	5.42857	5.14679	11.632	0	26.0502	0	0	1	-3.84286	0	0	0	0	0	0	0	0	1	1	1	1	0	0	0	0	0
0.798957	10	18	28	81	18	81	10	81	81	0.27881	6.3521e-05	4.57308e-07	8.15009e-08	0.278874	0	0	0	0	1	1	1	0	1	10.1837	7.31193	0	8.42478	25.9204	0	0	0	0	0	0	0	0	0	0	0	0	0	0	0	0	0	0	1	1	0
1.67218	17	14	31	82	17	82	82	82	14	0.011819	6.8979e-05	1.97878e-05	5.94184e-08	0.0119078	1	0	1	0	1	1	1	0	1	8.94898	13.6789	9.12	0	31.7479	0	0	0	0	0	0	0	0	0	0	0	0	0	1	1	0	0	0	0	1	0
1.90931	16	1	17	82	82	82	1	16	82	0.00400001	0.000711346	1.18709e-08	9.67788e-10	0.00471137	0	0	1	0	0	0	0	0	3	6.85714	15.578	0	10.2301	32.6652	0	0	0	0	0	0	0	0	0	0	0	0	1	1	0	1	0	0	0	0	0
2.11103	6	19	25	81	81	19	6	81	81	0.000329978	0.138304	1.44928e-12	4.09368e-11	0.138634	1	1	0	0	1	0	0	0	1	0	11.6055	9.12	8.42478	29.1503	0	0	0	0	0	0	0	0	0	0	0	0	1	1	0	1	0	0	0	0	0
0.84367	11	4	15	11	81	81	81	4	81	0.95828	7.46911e-06	1.29923e-10	3.51697e-13	0.958288	0	0	1	1	0	0	0	0	1	15.551	0	9.144	7.86726	32.5623	0	0	0	0	0	0	0	0	0	0	0	0	0	1	0	0	0	0	0	0	0
0.884662	5	3	8	81	81	81	3	5	81	0.29225	0.0122214	3.7032e-08	1.694e-05	0.304488	0	0	0	0	0	0	0	0	1	9.54082	5.36697	0	9.75221	24.66	0	0	0	0	0	0	0	0	0	0	0	0	1	0	1	0	0	0	0	0	0
1.34278	11	1	12	1	82	11	82	82	82	1.08607	0.00353903	1.53996e-11	1.26529e-05	1.08962	0	0	0	0	0	0	0	0	2	0	5.10092	10.76	7.88496	30.3377	0	0	0	0	0	0	0	0	0	0	1	6.59184	1	1	0	1	0	0	0	0	0
7.40078	8	8	16	81	8	81	8	81	81	0.0459345	0.0349942	2.17628e-06	2.88988e-08	0.0809309	0	0	0	0	0	0	0	0	2	6.63265	9.91743	0	10.2478	54.8809	0	0	0	0	0	0	1	9.64179	2	18.4412	0	0	1	1	0	0	0	0	0	0	0
3.53804	10	18	28	81	18	81	81	81	10	0.0224688	0.000103518	7.1783e-06	7.39082e-10	0.0225795	1	0	0	0	1	1	1	0	1	10.0408	6.42202	9.12	0	62.0522	0	0	0	0	2	12.6667	2	15.2537	1	8.54902	0	0	1	1	0	0	0	0	0	1	0
2.99168	19	15	34	82	82	15	19	82	82	0.31097	0.000503227	2.76081e-09	2.25622e-06	0.311476	0	0	1	0	1	1	1	0	1	0	5.92661	7.336	10.4336	23.6962	0	0	0	0	0	0	0	0	0	0	0	0	1	1	1	0	0	1	1	1	1
0.89577	20	18	38	81	20	18	81	81	81	0.00272742	0.00789813	3.00814e-07	8.34136e-09	0.0106259	1	0	1	0	0	0	1	0	1	13.6327	6.05505	7.192	0	36.3793	1	7.24242	1	-2.25714	0	0	0	0	0	0	0	0	1	0	0	1	0	0	0	0	0
0.983163	1	6	7	6	81	81	81	81	1	0.00231322	6.72462e-05	1.28798e-07	2.83625e-06	0.00238343	0	0	1	0	0	0	0	0	1	15.7041	5.22018	9.152	10.4159	40.4922	0	0	0	0	0	0	0	0	0	0	0	0	1	1	0	0	0	0	0	0	0
0.958027	12	20	32	81	12	81	81	20	81	0.00286322	2.66865e-06	5.52987e-09	5.66696e-11	0.0028659	0	0	0	0	0	0	0	0	1	5.38776	15.7064	0	8.40708	44.6198	2	8.0303	0	0	0	0	0	0	1	7.08824	0	0	0	1	1	0	0	0	0	0	0
0.743343	17	3	20	81	81	81	17	3	81	0.430675	0.00075107	6.02633e-09	2.67199e-06	0.431429	0	0	1	0	0	0	1	0	1	7.15306	5.59633	0	7.86726	20.6166	0	0	0	0	0	0	0	0	0	0	0	0	1	1	0	0	0	0	0	1	0
1.06249	14	3	17	82	14	3	82	82	82	0.0236455	0.00649806	2.64423e-07	2.67669e-08	0.0301438	0	0	0	0	0	0	0	0	1	6.08163	5.17431	9.904	0	32.1913	0	0	1	-3.6	0	0	0	0	1	7.43137	0	0	0	1	1	1	0	0	0	0	0
0.76417	14	16	30	16	82	82	82	82	14	0.0810605	0.0780836	8.1134e-08	1.51916e-07	0.159144	0	0	0	1	0	0	0	0	1	5.38776	0	7.944	8.40708	39.7029	0	0	2	-3	1	5.59091	1	9.37313	0	0	0	0	0	1	1	1	0	0	0	0	0
4.39654	17	9	26	81	81	81	9	17	81	0.000336336	6.40607e-07	4.67628e-06	3.5575e-11	0.000341653	0	0	0	1	0	0	0	0	2	14.0816	14.055	0	9.73451	75.7422	0	0	0	0	0	0	0	0	0	0	0	0	1	1	0	0	0	0	0	0	0
4.39654	17	9	26	81	81	81	9	17	81	1.59732	7.24212e-05	2.3073e-08	4.74255e-06	1.5974	0	0	0	1	0	0	0	0	2	14.0816	14.055	0	9.73451	75.7422	0	0	0	0	0	0	0	0	0	0	0	0	1	1	0	0	0	0	0	0	0
11.847	3	14	17	14	81	3	81	81	81	0.140527	0.0144723	1.13751e-06	1.84231e-09	0.155001	0	0	0	0	0	0	0	0	1	0	6.41284	11.632	8.57522	26.6201	0	0	0	0	0	0	0	0	0	0	0	0	1	1	0	0	0	0	0	1	0
1.01397	6	3	9	82	3	82	6	82	82	0.00097383	0.0111484	9.56052e-06	2.49321e-06	0.0121343	1	0	0	0	1	1	1	0	2	12.1122	8.55046	0	8.43363	39.4344	1	4.16667	1	-6.17143	0	0	0	0	0	0	0	0	1	1	0	1	0	0	0	1	0
1.91295	10	7	17	10	81	81	7	81	81	0.543319	0.047076	1.03809e-10	2.96656e-08	0.590395	1	0	0	0	1	0	0	0	2	0	6.07339	10.88	8.58407	33.3232	0	0	1	-7.78571	0	0	0	0	0	0	0	0	1	1	0	1	0	0	0	1	0
9.46425	14	12	26	81	12	14	81	81	81	0.002421	0.000486394	3.68305e-07	4.96595e-09	0.00290777	0	0	0	0	0	0	0	0	1	13.0204	5.3578	9	0	70.4285	1	3.31818	0	0	1	9.39394	1	8.62687	2	15.3235	1	6.38776	1	1	1	1	0	0	0	0	0
2.55329	11	16	27	81	81	81	81	11	16	0.0443437	0.00422985	2.58269e-07	7.04371e-07	0.0485745	0	0	0	1	0	0	0	0	1	10.1939	0	9.44	9.93805	47.8634	1	3.31818	0	0	1	6.21212	1	8.76119	0	0	0	0	0	0	0	0	0	0	0	0	0
0.969556	3	20	23	3	81	81	20	81	81	0.11675	0.000252746	1.01949e-05	5.1102e-07	0.117014	0	0	0	0	0	0	0	0	1	0	8.06422	10.88	7.88496	45.7623	0	0	0	0	1	10.5152	1	8.41791	0	0	0	0	1	1	0	1	0	0	0	0	0
0.891643	9	10	19	82	10	82	82	82	9	0.0600061	0.0341163	8.50959e-08	9.95191e-08	0.0941226	1	0	0	0	1	1	1	0	1	5.58163	9.81651	9.56	0	28.3521	1	3.39394	0	0	0	0	0	0	0	0	0	0	1	1	1	0	0	0	0	1	0
1.08731	6	13	19	82	6	82	13	82	82	0.847684	0.0123095	1.01984e-09	1.42727e-08	0.859994	0	1	1	0	0	0	0	0	1	7.15306	6.05505	0	7.76991	20.978	0	0	0	0	0	0	0	0	0	0	0	0	1	1	1	0	0	0	0	0	0
1.02885	3	12	15	3	81	81	81	12	81	1.87328	0.00668455	1.2728e-07	3.06653e-12	1.87996	0	0	0	0	0	0	0	0	1	13.6327	0	8.432	8.0708	30.1355	0	0	0	0	0	0	0	0	0	0	0	0	0	1	0	1	0	0	0	0	0
1.49613	14	19	33	82	19	82	82	14	82	0.0364076	0.0149855	1.32938e-10	6.21568e-06	0.0513993	0	0	1	0	0	0	0	0	1	6.5	8.90826	0	10.2389	28.829	1	3.18182	0	0	0	0	0	0	0	0	0	0	1	1	0	1	0	0	0	0	0
1.14914	15	14	29	82	15	82	82	82	14	0.03688	2.35232e-06	1.15789e-08	3.04461e-08	0.0368824	0	0	0	0	0	1	0	0	1	7.91837	8.55046	7.712	0	47.5658	0	0	0	0	0	0	1	7.1791	2	16.2059	0	0	1	0	0	0	0	0	0	0	0
3.43465	8	3	11	81	81	81	81	3	8	0.876473	0.000375293	1.19005e-06	8.97989e-10	0.87685	0	0	1	0	0	0	0	0	1	7.32653	8.22936	12.832	8.76991	54.9297	0	0	0	0	0	0	0	0	1	9.58824	1	8.18367	1	1	1	0	0	0	0	0	0
8.03998	8	17	25	17	81	81	81	81	8	0.0402276	0.00117176	1.58112e-08	1.89637e-08	0.0413994	1	0	0	0	0	1	0	0	1	15.551	0	10.16	10.2478	52.7165	0	0	0	0	0	0	1	9.52239	1	7.23529	0	0	1	1	0	0	0	0	0	1	0
0.625051	17	16	33	82	17	16	82	82	82	1.68081	0.0109377	4.69623e-10	2.64286e-09	1.69175	1	0	1	1	1	1	1	0	1	9.84694	8.65138	9.904	0	28.4023	0	0	0	0	0	0	0	0	0	0	0	0	1	1	0	0	0	0	0	1	0
2.70757	18	3	21	82	18	3	82	82	82	0.294412	0.114603	1.60976e-10	3.04177e-09	0.409015	0	0	0	0	0	0	0	0	3	15.551	11.6055	10.76	0	53.2451	0	0	2	-15.3286	0	0	0	0	0	0	0	0	1	1	1	1	0	0	0	0	0
0.980943	1	6	7	1	81	6	81	81	81	0.00326152	0.0168287	3.57189e-09	7.71472e-08	0.0200903	0	0	0	0	0	0	0	0	2	0	7.46789	9.904	7.89381	36.1106	0	0	1	-3.02857	0	0	0	0	0	0	1	7.81633	1	1	1	0	0	0	0	0	0
2.30444	19	13	32	81	19	81	81	13	81	0.000485382	0.0132948	1.11725e-10	1.95458e-08	0.0137802	0	0	0	0	0	0	0	0	1	11.4592	8.02752	0	7.76991	65.5916	0	0	0	0	0	0	1	7.77612	2	21.5588	1	9	1	0	0	0	0	0	0	0	0
0.938486	16	4	20	82	82	16	4	82	82	0.0313179	0.145467	3.07928e-12	1.64471e-09	0.176785	1	0	1	1	0	1	1	0	1	0	8.65138	9.68	7.89381	26.2252	0	0	0	0	0	0	0	0	0	0	0	0	1	1	0	0	0	0	0	0	0
2.04063	14	1	15	82	1	82	82	82	14	1.06201	0.000716003	2.39797e-11	5.82184e-06	1.06273	0	0	0	0	0	0	0	0	1	12.3061	6.0367	8.368	0	39.0934	0	0	1	4.65714	0	0	0	0	1	7.72549	0	0	0	0	1	0	0	0	0	1	0
0.926573	12	11	23	81	81	81	81	11	12	0.869211	0.0235829	8.49204e-10	3.51006e-06	0.892797	0	0	0	0	0	0	0	0	1	15.551	0	8.368	8.61062	32.5296	0	0	0	0	0	0	0	0	0	0	0	0	0	1	0	0	0	0	0	0	0
0.79034	4	3	7	3	81	81	4	81	81	0.00293551	0.0149305	5.35038e-10	9.88343e-09	0.0178661	0	0	0	1	0	0	0	0	1	0	9.70642	8.376	8.27434	27.6711	0	0	1	-1.31429	0	0	0	0	0	0	0	0	1	1	0	0	0	0	0	0	0
2.90892	16	8	24	81	8	81	81	81	16	0.902158	0.000113765	2.12789e-07	3.37194e-07	0.902272	0	0	0	0	0	0	0	0	2	8.82653	11.8165	9.592	0	53.9952	0	0	0	0	1	5.86364	1	10.2985	1	7.59804	0	0	1	1	0	1	0	0	0	0	0
1.15749	1	16	17	82	1	82	82	16	82	0.0299213	0.000141003	5.1236e-10	1.40623e-09	0.0300623	0	0	1	1	0	0	0	0	1	13.6327	7.44037	0	8.59292	29.666	0	0	0	0	0	0	0	0	0	0	0	0	1	0	1	0	0	0	0	0	0
1.04618	11	11	22	81	81	81	11	11	81	0.0321712	0.0133237	1.18921e-11	7.7416e-06	0.0455027	0	0	0	0	0	0	0	0	1	9.35714	8.88991	0	10.2478	28.4948	0	0	0	0	0	0	0	0	0	0	0	0	1	1	0	0	0	0	0	0	0
1.31277	8	4	12	81	8	81	81	81	4	8.63756e-05	7.51617e-05	2.85284e-07	1.82096e-05	0.000180032	1	0	1	0	0	0	1	0	2	7.77551	5.14679	10.88	8.76991	38.7865	0	0	1	-6.21429	0	0	0	0	0	0	0	0	1	1	0	1	0	0	0	1	0
0.710283	3	5	8	81	3	81	81	81	5	0.00287655	0.00166159	6.05415e-08	1.68964e-05	0.00455509	0	0	0	0	0	0	0	0	1	13.0204	5.11009	7.712	0	25.8425	0	0	0	0	0	0	0	0	0	0	0	0	1	1	0	1	0	0	0	0	0
1.34946	12	20	32	81	12	20	81	81	81	0.842471	0.000662928	1.13275e-09	1.16518e-08	0.843134	0	0	1	1	0	1	0	0	3	9.72449	5.61468	7.52	0	31.1337	0	0	0	0	0	0	0	0	1	8.27451	0	0	1	1	1	0	0	0	0	0	0
0.984842	19	2	21	82	82	82	19	2	82	0.04962	0.00840648	1.64485e-08	2.67224e-06	0.0580292	0	0	0	0	0	0	0	0	1	5.90816	8.6789	0	9.75221	24.3393	0	0	0	0	0	0	0	0	0	0	0	0	1	1	0	0	0	0	0	0	0
1.37848	9	11	20	82	82	9	11	82	82	0.000780514	0.000468874	5.27125e-11	2.23641e-08	0.00124941	0	0	0	0	0	0	0	0	1	0	7.84404	7.712	8.40708	23.9631	0	0	0	0	0	0	0	0	0	0	0	0	0	1	0	0	0	0	0	0	0
1.05838	20	3	23	82	3	82	82	82	20	0.00231348	0.00408782	3.95407e-07	2.2495e-11	0.0064017	0	0	1	0	0	0	0	0	1	8.67347	15.578	8.12	0	82.1714	0	0	0	0	0	0	1	7.77612	4	32.5	1	9.52381	1	0	0	0	0	0	0	0	0
0.951046	3	15	18	81	15	81	81	81	3	0.431172	0.0089364	1.25788e-07	1.61357e-06	0.44011	1	0	1	0	0	1	0	0	1	11.4592	5.36697	7.416	0	33.5579	0	0	1	-1.61429	0	0	1	7.70149	0	0	0	0	1	0	0	0	0	0	0	1	0
3.81632	9	13	22	81	9	81	81	13	81	0.00431768	0.286923	2.17072e-06	3.73332e-06	0.291247	0	0	0	0	0	0	0	0	1	13.6327	13.0367	0	10.4336	46.484	0	0	0	0	0	0	0	0	0	0	1	9.38095	1	1	0	0	0	0	0	0	0
3.89864	4	13	17	82	82	82	4	13	82	1.09845	0.00104608	1.39869e-09	4.13017e-09	1.0995	1	0	0	0	0	0	0	0	1	9.54082	5.53211	0	8.0885	38.5402	3	15.3788	0	0	0	0	0	0	0	0	0	0	1	1	0	1	0	0	0	1	0
0.813969	1	16	17	1	81	16	81	81	81	0.00103001	0.22948	4.54981e-08	1.57544e-05	0.230526	1	0	0	0	0	0	0	0	3	0	8.27523	8.12	9.75221	26.1474	0	0	0	0	0	0	0	0	0	0	0	0	1	1	0	1	0	0	0	0	0
2.83541	11	15	26	81	15	81	11	81	81	0.00121047	0.00026612	3.68161e-07	3.40663e-07	0.0014773	0	0	0	0	0	0	0	0	1	10.1939	5.82569	0	10.2301	26.2497	0	0	0	0	0	0	0	0	0	0	0	0	1	1	0	0	0	0	0	0	0
1.01796	15	1	16	81	1	81	81	81	15	0.975409	0.000454189	3.73338e-12	3.00164e-08	0.975863	0	0	0	0	0	0	0	0	2	9.72449	5.59633	12.832	0	34.9147	0	0	0	0	0	0	0	0	0	0	1	6.7619	1	0	1	1	0	0	0	0	0
1.83029	13	9	22	81	13	9	81	81	81	0.408683	0.00173338	2.89032e-06	2.63746e-08	0.410419	0	0	0	0	0	0	0	0	1	12.0102	6.54128	9.848	0	28.3995	0	0	0	0	0	0	0	0	0	0	0	0	1	1	0	0	0	0	0	0	0
0.788687	10	6	16	81	10	6	81	81	81	2.09225	0.000485452	9.20765e-10	1.22379e-06	2.09274	0	1	0	0	0	0	0	0	1	15.7041	8.65138	9.12	0	33.4755	0	0	0	0	0	0	0	0	0	0	0	0	0	0	0	1	0	0	0	0	0
1.04523	4	17	21	17	81	81	81	4	81	0.0111579	0.000436592	6.31669e-07	4.17276e-07	0.0115955	0	0	0	0	0	0	0	0	2	5.68367	0	9.152	8.58407	23.4197	0	0	0	0	0	0	0	0	0	0	0	0	1	0	0	1	0	0	0	0	0
0.844295	1	8	9	1	81	81	81	81	8	0.000122112	0.000366996	1.62019e-09	5.82203e-06	0.000494932	1	0	0	0	0	0	0	0	3	14.0816	0	8.96	9.76106	32.8027	0	0	0	0	0	0	0	0	0	0	0	0	1	1	0	1	0	0	0	1	0
2.40134	7	10	17	7	81	81	81	81	10	0.00464738	0.000276577	8.196e-06	4.29982e-08	0.0049322	1	0	0	0	1	1	0	0	1	14.0816	0	10.76	8.76991	61.2655	0	0	0	0	2	14.8182	1	12.8358	0	0	0	0	0	1	1	0	0	0	0	1	0
3.91295	8	10	18	81	81	10	81	81	8	1.21431	0.00396168	1.13329e-09	2.08708e-06	1.21827	0	0	0	0	0	0	0	0	1	6.30612	6.42202	10.16	0	31.6432	0	0	0	0	0	0	0	0	0	0	1	8.7551	1	1	0	0	0	0	0	0	0
2.07134	20	10	30	81	81	81	20	10	81	0.00984715	0.00179794	2.86189e-09	1.80756e-08	0.0116451	1	0	0	0	0	0	0	0	1	9.35714	9.2844	0	8.58407	27.2256	0	0	0	0	0	0	0	0	0	0	0	0	0	1	0	0	0	0	0	0	0
1.32577	15	12	27	82	15	82	12	82	82	0.034466	1.06241	2.58659e-06	3.5704e-07	1.09688	0	0	0	0	0	0	0	0	1	5.53061	6.88073	0	8.07965	48.3694	2	10.6818	0	0	0	0	1	8.76119	0	0	1	8.43537	1	1	0	1	0	0	0	0	0
3.01678	7	18	25	82	82	7	82	82	18	0.1554	0.00590696	2.53086e-11	1.89967e-09	0.161307	0	0	0	0	0	0	0	0	1	6.30612	15.578	10.88	0	37.8641	0	0	1	-5.1	0	0	0	0	0	0	0	0	1	1	0	0	0	0	0	0	0
1.23067	10	6	16	81	6	10	81	81	81	0.935917	0.00175183	1.33138e-09	1.27618e-05	0.937681	0	0	0	0	0	0	0	0	1	15.7041	7.06422	7.952	0	30.7203	0	0	0	0	0	0	0	0	0	0	0	0	1	1	0	1	0	0	0	0	0
3.03121	9	9	18	9	82	82	82	9	82	0.0643565	0.000417562	1.38352e-10	1.08121e-08	0.0647741	0	0	1	0	0	0	0	0	1	11.6122	0	12.832	8.27434	37.9761	1	5.25758	0	0	0	0	0	0	0	0	0	0	1	0	0	0	0	0	0	0	0
0.882394	3	7	10	81	7	81	3	81	81	0.943112	0.0006284	8.97412e-10	7.37186e-09	0.94374	0	0	0	0	1	1	1	0	1	9.77551	8.61468	0	8.0885	26.4787	0	0	0	0	0	0	0	0	0	0	0	0	1	1	0	1	0	0	0	1	0
4.29217	11	13	24	81	13	81	81	11	81	0.0522112	1.13263e-05	1.66348e-07	2.59037e-07	0.052223	1	0	0	0	0	1	1	0	1	8.67347	15.9541	0	8.59292	33.2205	0	0	0	0	0	0	0	0	0	0	0	0	1	1	0	0	0	0	0	0	0
1.2579	13	19	32	81	13	81	81	19	81	0.460165	0.000679378	4.08368e-10	3.29809e-08	0.460844	0	0	1	0	0	0	0	0	2	15.551	4.79817	0	8.76991	57.0112	0	0	1	3	0	0	0	0	3	24.8922	0	0	0	1	0	0	0	0	0	0	0
1.53072	3	12	15	82	12	82	82	3	82	0.0246993	0.0249479	2.41463e-09	3.59495e-07	0.0496475	1	0	0	0	0	1	0	0	3	8.93878	9.70642	0	10.2566	54.1183	0	0	1	-6.47143	0	0	0	0	2	18.7451	0	0	1	1	0	1	0	0	0	1	0
1.03728	14	5	19	82	5	82	82	82	14	0.174235	0.0344346	3.52667e-10	8.61291e-07	0.20867	1	0	1	0	1	0	0	0	2	10.2347	12.1101	9.904	0	32.7059	0	0	1	0.457143	0	0	0	0	0	0	0	0	1	1	0	1	0	0	0	1	0
1.11719	14	13	27	14	81	81	81	13	81	0.677866	1.75298e-05	2.99629e-06	3.54201e-09	0.677886	1	0	0	0	1	1	1	0	1	12.1531	0	8.12	9.93805	45.917	0	0	0	0	0	0	0	0	2	15.7059	0	0	0	0	1	0	0	0	0	1	0
1.72518	16	4	20	81	16	81	4	81	81	0.579376	0.274538	8.19743e-11	1.03233e-06	0.853915	0	0	1	0	0	0	0	0	1	5.42857	7.82569	0	8.41593	55.9071	0	0	1	-5.64286	1	7.34848	1	11.0299	1	10.2157	0	0	1	0	0	0	0	0	0	0	0
1.15727	7	12	19	82	82	82	7	12	82	0.892437	0.000209649	8.73108e-06	1.27657e-05	0.892668	1	0	0	0	0	1	1	0	2	7.32653	7.97248	0	8.41593	23.7149	0	0	0	0	0	0	0	0	0	0	0	0	1	1	1	1	0	0	0	0	0
0.94313	10	3	13	3	81	81	10	81	81	0.0725405	0.445881	1.08628e-09	1.62886e-07	0.518422	1	0	1	0	0	0	0	0	2	0	7.01835	8.432	8.42478	31.3297	0	0	0	0	1	7.45455	0	0	0	0	0	0	1	1	1	1	0	0	0	0	0
1.41281	17	15	32	81	15	81	81	17	81	0.0881034	0.000973149	2.52783e-08	1.59029e-10	0.0890765	0	0	0	0	0	0	0	0	1	11.6122	12.2018	0	10.4336	34.2476	0	0	0	0	0	0	0	0	0	0	0	0	0	1	0	0	0	0	0	0	0
7.1284	4	1	5	1	81	4	81	81	81	0.00025098	0.0161728	6.59915e-09	2.91497e-07	0.0164241	0	0	0	0	0	0	0	0	3	0	9.91743	10.88	8.59292	45.41	0	0	0	0	0	0	0	0	2	16.0196	0	0	1	1	1	1	0	0	0	1	0
2.72198	11	9	20	82	82	9	11	82	82	0.0305535	0.0128844	1.79272e-06	2.76729e-11	0.0434397	0	0	0	0	1	1	0	0	1	0	16.0826	7.712	10.4336	55.8991	0	0	1	-5.48571	1	5.40909	1	10.7761	0	0	0	0	1	1	1	1	0	0	0	1	0
1.28728	14	13	27	14	81	13	81	81	81	0.324231	0.000887758	8.44594e-09	2.59196e-09	0.325119	1	0	0	0	1	1	1	0	1	0	5.34862	9.904	8.42478	31.2166	0	0	0	0	0	0	0	0	1	7.53922	0	0	1	1	0	0	0	0	0	1	0
0.71155	8	15	23	82	8	82	15	82	82	0.370526	0.0127419	4.98136e-08	2.55768e-09	0.383268	0	0	0	0	0	0	0	0	1	5.57143	10.7615	0	9.75221	33.0702	0	0	0	0	0	0	1	6.98507	0	0	0	0	1	1	0	1	0	0	0	0	0
5.99548	1	3	4	1	82	3	82	82	82	0.0340768	0.00426533	1.43398e-08	6.01088e-06	0.0383481	1	0	0	0	0	0	0	0	3	0	11.945	12.832	10.2566	74.6101	0	0	1	-2.27143	0	0	0	0	0	0	0	0	1	1	0	1	0	0	0	1	0
5.99548	1	3	4	1	82	3	82	82	82	0.00111038	0.00101472	2.78547e-08	2.84897e-06	0.00212797	1	0	0	0	0	0	0	0	3	0	11.945	12.832	10.2566	74.6101	0	0	1	-2.27143	0	0	0	0	0	0	0	0	1	1	0	1	0	0	0	1	0
0.963032	16	4	20	81	16	81	4	81	81	0.0948742	0.000140946	4.81368e-07	2.79021e-08	0.0950157	0	0	1	0	0	0	0	0	1	15.7041	7	0	7.76991	38.4128	0	0	0	0	0	0	0	0	0	0	1	7.93878	1	1	1	1	0	0	0	0	0
2.05827	12	12	24	81	12	81	81	12	81	0.815428	0.271702	1.18952e-06	3.58511e-11	1.08713	0	0	0	0	0	1	0	0	2	7.89796	15.9541	0	9.76106	50.1229	0	0	0	0	1	6.83333	0	0	1	9.67647	0	0	1	1	0	0	0	0	0	1	0
10.4362	9	14	23	82	82	82	9	14	82	0.57491	0.0841295	4.13793e-07	9.86998e-06	0.65905	0	0	0	0	0	0	0	0	1	8.67347	15.578	0	8.40708	32.6585	0	0	0	0	0	0	0	0	0	0	0	0	1	1	0	0	0	0	0	0	0
0.883235	12	7	19	82	82	12	82	82	7	0.00166538	0.028236	1.81819e-09	4.04353e-08	0.0299014	0	0	1	0	0	0	0	0	1	6.64286	5.11927	7.8	0	71.5196	0	0	1	-5.71429	2	21.5152	2	15.8358	1	8.89216	0	0	1	0	1	1	0	0	0	0	0
1.23593	5	1	6	81	1	81	81	5	81	0.936745	0.000569996	2.12769e-12	1.17601e-06	0.937316	0	0	1	0	0	0	0	0	1	15.551	5.90826	0	9.74336	39.0164	0	0	0	0	0	0	0	0	1	7.81373	0	0	1	1	0	0	0	0	0	0	0
1.67618	2	7	9	7	81	81	2	81	81	0.0457927	0.0256637	6.33637e-11	7.63203e-10	0.0714564	0	0	0	0	1	1	0	0	2	0	12.6239	9.848	7.89381	30.3657	0	0	0	0	0	0	0	0	0	0	0	0	1	1	0	1	0	0	0	1	0
1.37511	5	16	21	82	16	82	5	82	82	0.461908	0.000888411	5.19561e-07	4.67908e-07	0.462798	0	1	1	0	0	0	0	0	1	8.82653	15.9541	0	10.2301	41.4679	0	0	1	-6.45714	0	0	0	0	0	0	0	0	1	1	0	1	0	0	0	1	0
2.08101	18	15	33	82	82	82	15	18	82	0.0197655	0.00769707	7.09173e-11	9.95073e-07	0.0274635	0	0	0	0	1	0	0	0	1	15.551	16.0826	0	10.2566	41.8902	0	0	0	0	0	0	0	0	0	0	0	0	1	1	0	0	0	0	0	1	0
7.8669	11	12	23	12	81	11	81	81	81	0.0818286	1.40524e-05	3.92185e-07	1.65972e-14	0.0818431	0	0	0	0	0	0	0	0	2	0	11.6055	12.832	9.75221	34.1897	0	0	0	0	0	0	0	0	0	0	0	0	1	1	0	0	0	0	1	0	0
0.797773	19	6	25	6	81	81	81	81	19	0.0410767	0.0146709	9.51099e-08	1.29094e-07	0.0557478	0	0	0	0	0	0	0	0	2	10.1939	0	7.52	8.0885	26.5738	0	0	1	-0.771429	0	0	0	0	0	0	0	0	1	1	0	1	0	0	0	1	0
2.58597	13	11	24	11	82	82	13	82	82	0.00236726	0.265237	1.08285e-08	2.59739e-09	0.267604	0	0	0	0	0	0	0	0	2	0	7.87156	12.832	7.86726	37.2126	0	0	0	0	0	0	1	8.64179	0	0	0	0	1	1	0	1	0	0	0	0	0
1.26732	10	5	15	82	5	82	10	82	82	0.0122987	0.0122822	3.73682e-08	2.76139e-09	0.0245809	0	0	0	0	1	1	1	0	1	8.90816	4.99083	0	8.57522	22.4742	0	0	0	0	0	0	0	0	0	0	0	0	1	0	0	1	0	0	0	1	0
0.954568	19	7	26	81	19	7	81	81	81	0.0320613	0.0071998	9.59004e-09	2.67314e-08	0.0392612	0	0	0	0	0	1	0	0	1	5.94898	6.92661	7.368	0	30.0573	0	0	0	0	0	0	0	0	1	9.81373	0	0	1	1	1	0	0	0	0	1	0
0.860346	6	17	23	82	6	17	82	82	82	0.030528	1.06186e-06	2.92073e-09	5.66341e-07	0.0305297	0	0	0	0	0	0	0	0	1	8.31633	8.68807	7.952	0	24.9564	0	0	0	0	0	0	0	0	0	0	0	0	1	1	0	0	0	0	0	0	0
2.79444	8	12	20	81	81	81	8	12	81	0.0236019	0.000645826	1.09123e-07	9.23635e-08	0.0242479	1	0	1	1	1	0	1	0	1	5.7551	12.2477	0	7.88496	39.5577	0	0	1	-6.37143	0	0	1	7.29851	0	0	0	0	1	1	1	1	0	0	0	1	0
0.837612	2	16	18	81	2	16	81	81	81	1.22377	0.0434604	2.58442e-11	6.29709e-07	1.26723	1	0	0	0	1	1	1	0	1	8.92857	5.57798	7.64	0	22.1466	0	0	0	0	0	0	0	0	0	0	0	0	1	1	0	1	0	0	0	1	0
1.13875	13	18	31	13	81	18	81	81	81	0.52731	0.0156329	7.74588e-09	4.6154e-10	0.542943	0	0	0	0	0	0	0	0	1	0	7.45872	12.832	9.73451	30.0252	0	0	0	0	0	0	0	0	0	0	0	0	1	1	0	0	0	0	0	0	0
1.53657	20	16	36	81	16	81	81	81	20	0.438555	0.0943549	5.74207e-10	5.79579e-06	0.532916	0	0	1	0	0	0	0	0	1	6.08163	5.56881	12.832	0	24.4824	0	0	0	0	0	0	0	0	0	0	0	0	0	1	0	1	0	0	0	0	0
1.14803	10	18	28	81	10	18	81	81	81	0.897218	2.70351e-05	6.47825e-12	4.5456e-06	0.897249	0	0	0	0	0	0	0	0	1	7.55102	6.54128	10.16	0	24.2523	0	0	0	0	0	0	0	0	0	0	0	0	1	1	1	0	0	0	0	0	0
1.8635	4	10	14	10	82	82	4	82	82	0.0363766	0.000804297	4.36154e-07	5.31549e-08	0.0371814	0	0	0	0	0	0	0	0	1	0	6.88073	7.896	9.93805	50.8673	0	0	0	0	1	11.8636	1	7.80597	0	0	1	6.48299	1	1	0	1	0	0	0	0	0
1.04724	19	14	33	81	81	19	14	81	81	0.883695	0.000956972	4.70159e-08	5.52692e-06	0.884657	0	0	0	0	0	0	0	0	1	0	7.24771	8.12	10.2301	44.0485	1	5.13636	2	-13.3143	0	0	0	0	0	0	0	0	1	1	0	1	0	0	0	0	0
1.16059	7	3	10	82	82	82	82	7	3	0.407019	0.001364	7.00069e-10	7.3639e-08	0.408383	0	0	1	0	0	0	0	0	1	13.6327	0	7.52	7.88496	39.2467	0	0	0	0	0	0	1	10.209	0	0	0	0	1	0	0	0	0	0	0	0	0
1.222	6	5	11	82	5	82	82	6	82	0.0360159	0.0702633	1.2219e-07	3.07832e-08	0.106279	0	0	0	0	0	0	0	0	3	7.28571	5.59633	7.52	10.2478	41.6784	0	0	4	-11.0286	0	0	0	0	0	0	0	0	1	1	0	1	0	0	0	0	0
4.58643	11	5	16	5	82	11	82	82	82	0.913925	0.158348	3.73526e-06	2.74726e-11	1.07228	1	0	0	0	1	1	0	0	1	0	7.0367	11.632	9.93805	42.4285	0	0	1	-6.31429	0	0	1	7.50746	0	0	0	0	1	1	0	1	0	0	0	1	0
2.91189	15	7	22	81	81	81	7	15	81	0.326889	0.0692439	6.04825e-10	7.95387e-07	0.396134	0	0	0	0	0	0	0	0	2	12.1531	10.0826	0	8.58407	30.8198	0	0	0	0	0	0	0	0	0	0	0	0	1	1	0	0	0	0	0	1	0
1.50017	14	16	30	14	82	82	82	82	16	0.0111048	0.00158864	6.51712e-11	7.7928e-06	0.0127013	0	0	0	0	0	0	0	0	2	15.551	0	7.952	8.0531	31.5561	0	0	0	0	0	0	0	0	0	0	0	0	1	1	0	1	0	0	0	0	0
1.38567	8	3	11	82	3	82	82	8	82	0.00125548	0.000486852	2.17133e-07	3.30856e-07	0.00174288	0	0	0	0	1	1	1	0	1	6.7449	9.37615	0	9.74336	37.7441	1	4.74242	0	0	0	0	0	0	1	7.13725	0	0	1	1	1	1	0	0	0	0	0
1.03289	2	4	6	4	82	82	82	2	82	5.90479e-06	3.11296e-05	3.91465e-08	4.31611e-10	3.7074e-05	0	0	0	0	0	0	0	0	1	5.89796	0	7.488	8.76991	52.0182	2	10.0758	0	0	1	10.697	1	9.08955	0	0	0	0	1	1	0	0	0	0	0	0	0
1.56706	4	1	5	1	81	4	81	81	81	0.973211	1.74468e-06	2.01311e-13	1.0073e-10	0.973213	0	0	0	0	0	0	0	0	1	0	8.86239	9.848	8.56637	27.2768	0	0	0	0	0	0	0	0	0	0	0	0	1	1	0	1	0	0	0	0	0
0.96544	8	5	13	82	82	82	5	8	82	3.65597e-05	0.288424	2.45054e-08	5.03099e-12	0.288461	0	0	0	1	0	0	0	0	1	15.551	7.84404	0	8.58407	45.836	0	0	1	-6.7	0	0	0	0	1	7.15686	0	0	0	1	0	0	0	0	0	0	0
1.61706	13	18	31	82	13	82	18	82	82	0.023852	5.93977e-05	6.8921e-06	9.37521e-09	0.0239183	0	0	0	0	0	0	0	0	1	15.7041	4.93578	0	7.76991	60.4563	0	0	0	0	1	12.4394	1	11.2836	1	8.32353	0	0	1	1	0	0	0	0	0	0	0
0.984032	15	11	26	81	81	81	15	11	81	0.971609	0.101485	8.25996e-07	4.80416e-08	1.07309	1	0	0	0	1	1	1	0	2	7.55102	6.77982	0	8.43363	30.5096	0	0	0	0	0	0	0	0	1	7.7451	0	0	0	1	1	1	0	0	0	1	0
1.70191	10	15	25	82	15	82	10	82	82	0.013013	0.000412338	6.17608e-08	4.59678e-07	0.0134259	0	0	0	0	0	0	0	0	1	5.42857	5.34862	0	10.2301	34.5469	0	0	0	0	1	6.95455	0	0	0	0	1	6.58503	0	0	0	1	0	0	0	0	0
1.02274	17	17	34	81	81	81	17	17	81	0.0531309	0.382596	1.46572e-06	6.13036e-12	0.435728	1	0	0	0	1	1	1	0	2	9.9898	7.33945	0	8.43363	33.3609	0	0	0	0	0	0	0	0	1	7.59804	0	0	1	1	0	1	0	0	0	1	0
1.15351	11	12	23	82	82	82	12	11	82	0.0216752	0.0344967	2.56166e-10	7.37127e-08	0.056172	0	0	1	0	0	1	0	0	2	8.37755	5.30275	0	9.75221	35.5971	0	0	3	-4.17142	0	0	0	0	0	0	1	7.9932	0	1	0	1	0	0	0	0	0
1.05179	3	17	20	82	82	17	3	82	82	0.730897	0.137165	2.23965e-07	3.88793e-09	0.868063	0	0	1	0	1	1	1	0	2	0	13.0367	10.16	9.73451	32.9312	0	0	0	0	0	0	0	0	0	0	0	0	1	1	0	1	0	0	0	1	0
0.941859	1	9	10	81	1	81	81	9	81	0.687143	0.0186001	2.51555e-11	1.41014e-09	0.705743	1	0	0	0	0	0	0	0	3	13.6327	5.00917	0	8.0708	39.5951	0	0	0	0	0	0	0	0	1	12.8824	0	0	1	1	1	0	0	0	0	0	0
3.20431	5	17	22	81	17	81	81	81	5	0.105329	0.0159229	6.96772e-12	3.44182e-10	0.121252	1	0	0	0	1	1	1	0	1	9.66327	5.41284	9	0	31.0489	0	0	0	0	0	0	0	0	0	0	1	6.97279	1	0	0	1	0	0	0	1	0
0.978282	1	1	2	81	1	81	1	81	81	0.00942973	0.0175398	1.83686e-08	5.9335e-06	0.0269755	0	0	1	1	0	0	0	0	1	6.68367	6.3945	0	8.59292	21.6711	0	0	0	0	0	0	0	0	0	0	0	0	1	1	0	0	0	0	0	0	0
5.05131	1	3	4	1	82	82	3	82	82	0.0820504	0.0134948	1.0412e-08	2.09076e-06	0.0955472	0	0	0	0	0	0	0	0	3	0	6.00917	8.808	7.86726	34.9257	1	5.16667	0	0	0	0	1	7.07463	0	0	0	0	1	1	0	1	0	0	0	0	0
1.0663	20	19	39	19	81	81	20	81	81	0.0308027	0.0936016	2.16964e-06	2.44333e-09	0.124406	0	0	0	0	0	0	0	0	1	0	8.02752	7.952	10.4336	26.4131	0	0	0	0	0	0	0	0	0	0	0	0	1	0	0	0	0	0	0	0	0
1.03013	2	2	4	81	2	2	81	81	81	0.88998	0.000224694	1.70877e-10	3.58599e-05	0.890241	0	0	1	0	0	0	0	0	1	7.7449	4.98165	8.368	0	38.9279	0	0	0	0	0	0	0	0	2	17.8333	0	0	1	1	1	0	0	0	0	0	0
0.739684	1	10	11	1	81	10	81	81	81	0.000189763	0.00045649	1.32223e-10	1.21577e-10	0.000646254	0	0	1	0	0	0	0	0	1	0	4.87156	7.944	8.07965	26.2437	1	5.34848	0	0	0	0	0	0	0	0	0	0	0	1	1	0	0	0	0	0	0
1.24888	3	2	5	82	82	82	3	2	82	0.000605413	0.0132976	2.19804e-06	3.96482e-11	0.0139052	1	0	1	1	1	1	1	0	1	10.949	5.90826	0	8.56637	31.8093	0	0	3	-6.38571	0	0	0	0	0	0	0	0	1	1	0	0	0	0	0	1	0
0.941104	6	14	20	81	81	14	81	81	6	0.532232	0.0122112	7.83975e-09	6.35534e-07	0.544444	0	0	1	0	0	0	0	0	1	15.551	7.02752	8.912	0	38.339	1	6.84848	0	0	0	0	0	0	0	0	0	0	1	1	0	0	0	0	0	0	0
1.07479	1	13	14	81	1	81	81	81	13	0.218019	0.625983	5.68243e-10	3.95363e-06	0.844006	0	0	0	0	0	0	0	0	2	9.21429	8.27523	10.88	0	34.6574	0	0	0	0	1	6.28788	0	0	0	0	0	0	1	0	0	1	0	0	0	1	0
2.56288	3	15	18	81	3	81	15	81	81	0.596264	0.000110911	1.478e-12	9.36423e-09	0.596375	0	0	0	0	1	1	1	0	1	7.32653	5.56881	0	8.61062	34.7339	0	0	1	-0.914286	0	0	0	0	1	12.3137	0	0	0	0	0	1	0	0	0	1	0
1.49236	1	13	14	81	13	81	81	1	81	1.04833	0.000367761	8.22251e-11	3.09363e-06	1.0487	1	0	0	0	1	1	1	0	1	12.0102	8.61468	0	8.42478	44.8059	1	5.63636	1	0.757143	0	0	0	0	1	9.36275	0	0	0	1	0	0	0	0	0	1	0
1.78469	11	11	22	82	82	82	82	11	11	0.41076	0.000396252	1.2219e-08	4.87594e-08	0.411156	0	0	1	0	0	0	0	0	1	8.2551	0	7.712	10.2478	43.1458	0	0	0	0	0	0	1	7.97015	1	8.96078	0	0	1	1	0	1	0	0	0	0	0
1.12463	20	6	26	20	82	82	82	6	82	1.02909	0.0124706	1.83513e-08	1.54775e-07	1.04156	1	0	0	0	0	0	0	0	1	8.2551	0	7.712	10.2301	51.9617	0	0	0	0	0	0	0	0	1	7.85294	2	17.9116	1	0	0	0	0	0	0	0	0
0.872482	4	8	12	4	82	82	82	82	8	2.07218	0.142542	4.59607e-06	4.62884e-06	2.21474	0	0	0	0	0	0	0	0	1	6.86735	0	8.12	8.0885	60.7875	0	0	0	0	1	6.06061	1	9.29851	2	15.8627	1	6.4898	1	1	0	1	0	0	0	0	0
1.96254	17	3	20	17	82	82	82	82	3	0.0353495	0.200508	1.75083e-06	1.74953e-07	0.235859	0	0	0	0	0	0	0	0	3	12.1939	0	10.88	9.93805	40.1691	0	0	1	-7.15714	0	0	0	0	0	0	0	0	1	1	0	1	0	0	0	0	0
1.24343	3	20	23	20	81	81	81	81	3	0.0919265	3.43373e-05	1.51429e-09	9.47056e-07	0.0919618	0	0	0	0	0	1	0	0	1	15.7041	0	9.848	7.76991	52.2926	0	0	0	0	0	0	0	0	2	18.9706	0	0	0	1	0	1	0	0	0	0	0
1.32176	17	18	35	82	18	17	82	82	82	0.00490236	0.00109982	8.93488e-09	7.03408e-09	0.0060022	0	0	0	0	0	0	0	0	3	7.33673	7.95413	11.632	0	47.3698	1	4.72727	0	0	0	0	0	0	1	7.61765	1	8.10204	1	0	0	0	0	0	0	0	0
1.02667	6	20	26	82	82	82	82	6	20	0.0493054	0.00131981	2.0767e-07	1.20321e-08	0.0506254	0	0	0	0	0	0	0	0	3	9.77551	0	7.712	8.59292	44.2145	0	0	0	0	0	0	1	9.44776	1	8.68627	0	0	1	1	0	0	0	0	0	0	0
[truncated: 29 more columns]

## Sheet: 2G - gkmSVM_8merOutputScores
chr1:39459379-39459460	1
chr1:86309382-86309464	0.832723
chr10:19414126-19414207	0.999428
chr10:21109927-21110008	0.922256
chr10:45193670-45193752	1
chr10:60750966-60751047	0.876665
chr10:68137554-68137636	1
chr10:81554481-81554563	0.960536
chr10:85539969-85540050	1
chr10:93188626-93188707	0.810865
chr10:93364578-93364660	0.628279
chr10:108456620-108456701	1
chr11:72022508-72022590	1
chr11:97950215-97950297	1
chr11:109109987-109110069	0.991157
chr11:109359483-109359565	0.557557
chr12:33345036-33345117	1
chr12:38778500-38778582	0.895081
chr12:70775033-70775114	0.795651
chr12:83527952-83528034	1
chr12:86931582-86931663	1
chr13:41737987-41738068	0.351201
chr13:69703646-69703728	1
chr14:55868337-55868418	1
chr14:59806818-59806899	1
chr14:60976433-60976515	1
chr15:25882211-25882293	0.623953
chr15:74692307-74692389	0.456458
chr15:87230070-87230152	0.939516
chr16:7797357-7797439	1
chr16:22545161-22545243	0.890822
chr16:22955780-22955862	0.796553
chr16:31552037-31552118	1
chr16:35488904-35488985	0.569307
chr16:36649424-36649506	0.678585
chr16:42575681-42575762	0.893015
chr16:42720043-42720124	0.73061
chr16:76321809-76321890	0.857173
chr16:87501907-87501988	1
chr16:96845634-96845715	0.823977
chr17:26537919-26538000	0.156011
chr17:31934104-31934186	1
chr17:56420914-56420996	1
chr17:62109192-62109274	0.662009
chr17:66190749-66190831	0.936527
chr17:74688806-74688888	0.806805
chr17:83536119-83536200	0.555894
chr18:34778729-34778811	1
chr18:47358689-47358771	0.615093
chr18:62820577-62820658	0.500581
chr18:63924767-63924849	0.71821
chr18:67288619-67288700	0.695655
chr19:37401085-37401167	0.769352
chr2:75960366-75960448	0.927751
chr2:91787049-91787131	0.776787
chr2:102054457-102054538	0.684492
chr2:172499000-172499081	0.906353
chr3:28842463-28842545	0.87736
chr3:34758017-34758099	1
chr3:85338346-85338428	0.902845
chr4:55005156-55005237	1
chr4:132315869-132315951	1
chr4:132959432-132959513	1
chr5:28398937-28399018	0.951885
chr5:35718016-35718098	1
chr5:52236769-52236850	0.987742
chr5:64299030-64299112	0.899275
chr5:75365877-75365958	0.305504
chr5:100680282-100680363	0.865714
chr5:104002963-104003044	0.907358
chr5:112228362-112228444	1
chr5:124213766-124213847	1
chr5:125166160-125166241	1
chr5:129156126-129156207	0.759644
chr5:129196723-129196804	0.798243
chr5:130950409-130950490	0.879868
chr5:148005468-148005549	0.376296
chr6:30375294-30375375	1
chr6:54097017-54097099	1
chr6:72623138-72623219	0.86303
chr7:4124344-4124425	0.882101
chr7:12885934-12886016	1
chr7:19609764-19609845	0.80561
chr7:43465963-43466045	0.595408
chr7:63957217-63957299	0.80137
chr7:81211813-81211894	0.907701
chr7:81867686-81867768	0.989098
chr7:107594477-107594558	0.477725
chr7:120861077-120861158	0.891487
chr7:127925435-127925516	1
chr7:142427512-142427594	0.970861
chr8:34732804-34732885	0.812537
chr8:48752101-48752183	1
chr8:70648955-70649036	1
chr8:123682464-123682546	1
chr9:46329529-46329610	0.831522
chr9:50124354-50124436	0.612839
chr9:83448018-83448099	1
chr9:102690588-102690670	1
chr9:110250359-110250440	0.802679
chrX:114694676-114694758	1
chr1:63092160-63092242	-0.919702
chr1:186261658-186261740	-0.825181
chr10:18597642-18597724	-1
chr10:82007778-82007859	-1
chr10:128631710-128631792	-1
chr11:5040653-5040735	-1
chr11:6600403-6600485	-1
chr11:8855538-8855619	-0.751082
chr11:11881895-11881977	-1
chr11:54860494-54860576	-0.658543
chr11:62494716-62494798	-0.567097
chr11:72951250-72951332	-1
chr11:80137985-80138067	-0.788103
chr11:87109019-87109101	-1
chr11:97813325-97813406	-0.588027
chr11:103325196-103325278	-1
chr11:109476444-109476525	-0.954819
chr11:118034688-118034769	-0.815639
chr12:80216574-80216655	-0.695806
chr13:37345246-37345327	-1
chr13:43209526-43209607	-0.604171
chr13:57984446-57984528	-0.827083
chr13:64439142-64439223	-0.723042
chr13:112001244-112001325	-0.782853
chr13:113041439-113041520	-1
chr14:57826081-57826162	-0.829472
chr14:105851574-105851656	-1
chr15:55318105-55318186	-1
chr15:59302359-59302441	-0.538534
chr15:72568757-72568838	-0.86739
chr15:74675213-74675295	-0.894951
chr15:77864492-77864573	-0.963522
chr15:82209826-82209907	-1
chr15:89158153-89158234	-1
chr15:97557760-97557841	-1
chr15:101082277-101082359	-1
chr16:17260686-17260768	-1
chr17:8802786-8802868	-1
chr17:27069900-27069981	-0.87646
chr17:29050747-29050828	-0.586411
chr17:31116633-31116715	-0.942699
chr17:33843547-33843628	-1
chr17:36234499-36234581	-0.361727
chr17:45581919-45582001	-1
chr17:70848772-70848853	-0.710152
chr17:70872724-70872806	-0.888584
chr18:43034268-43034350	-1
chr18:62004397-62004478	-0.913428
chr18:65590237-65590319	-0.815881
chr19:10233087-10233168	-0.703547
chr19:21789256-21789337	-0.691768
chr19:21818010-21818092	-1
chr19:43606979-43607060	-0.952179
chr19:47813156-47813238	-0.388685
chr2:32637850-32637931	-0.938059
chr2:52090145-52090227	-0.843545
chr2:91043239-91043320	-1
chr2:129166931-129167013	-0.874773
chr2:131180170-131180251	-0.541888
chr2:135199515-135199596	-0.986244
chr2:144186602-144186683	-1
chr2:157328664-157328746	-1
chr2:163889616-163889698	-1
chr2:168825735-168825816	-0.635521
chr3:89266621-89266703	-0.946905
chr3:102011440-102011521	-0.821141
chr4:59897311-59897392	-0.75586
chr4:82542259-82542340	-0.81136
chr4:132949936-132950017	-0.963996
chr4:133675732-133675813	-0.647282
chr4:134307315-134307396	-1
chr4:141284238-141284320	-1
chr4:152312442-152312523	-0.712956
chr5:33536581-33536663	-0.44469
chr5:53509392-53509474	-1
chr5:66080361-66080442	-0.793745
chr5:66815981-66816062	-1
chr5:115231058-115231139	-0.980932
chr5:117863083-117863164	-0.950561
chr5:119629732-119629813	-0.927231
chr5:124178422-124178504	-0.558492
chr5:135965800-135965882	-0.559823
chr6:70964286-70964367	-0.638729
chr6:89354687-89354768	-0.568451
chr6:118769907-118769988	-0.770173
chr6:140338171-140338252	-0.874457
chr7:4664622-4664704	-0.765519
chr7:37553998-37554079	-0.920705
chr7:80962986-80963067	-0.485028
chr7:107236814-107236895	-0.766085
chr7:144938714-144938795	-1
chr8:44979389-44979470	-1
chr8:60954437-60954518	-1
chr8:61505308-61505390	-0.90989
chr8:71570164-71570245	-1
chr8:118848626-118848708	-0.902965
chr9:9961010-9961092	-1
chr9:46150315-46150396	-1
chr9:58743939-58744020	-1
chr9:65084582-65084663	-0.746558
chr9:119932424-119932506	-0.878487
