# Supplementary material for: Synthetic and genomic regulatory elements reveal aspects of cis-regulatory grammar in mouse embryonic stem cells
Source: eLife. 2020 Feb 11;9:e41279. doi: 10.7554/eLife.41279 (PMC7077988; doi:10.7554/eLife.41279)
Supplement: Supplementary file 3. [file elife-41279-supp3.xlsx]

## Sheet: Primers
Name	Sequence	Demultiplexing BC
Synthetic_FW-1	CTTCTACTACTAGGGCCCA	-
Synthetic_Rev-2	CATGAACTAGCATGTAGAGCTC	-
Genomic_FW-1	GACTTACATTAGGGCCCGT	-
Genomic_Rev-1	CAGTATCGTAGTCCGAGCTC	-
CF121	TAGCGTCGAGGACATCAAGA	-
CF122	TGGTTTGTCCAAACTCATCAA	-
CF150	TACACCGTGGTGGAGCAGTA	-
CF151b	AGCGTACTCGAGTTGTTAACTTGTTTATTGCAGCTT	-
CF52	AATGATACGGCGACCACCGAG	-
CF53	CAAGCAGAAGACGGCATACGA	-
P1_XbaI_1_F	AATGATACGGCGACCACCGAGATCTACACTCTTTCCCTACACGACGCTCTTCCGATCTAACCTCA	AACCTCA
P1_XbaI_1_R	/5Phos/C*TAGTGAGGTTAGATCGGAAGAGCGTCGTGTAGGGAAAGAGTGTAGATCTCGGTGGTCGCCGTATCATT	AACCTCA
P1_XbaI_2_F	AATGATACGGCGACCACCGAGATCTACACTCTTTCCCTACACGACGCTCTTCCGATCTTCTAAGC	TCTAAGC
P1_XbaI_2_R	/5Phos/C*TAGGCTTAGAAGATCGGAAGAGCGTCGTGTAGGGAAAGAGTGTAGATCTCGGTGGTCGCCGTATCATT	TCTAAGC
P1_XbaI_3_F	AATGATACGGCGACCACCGAGATCTACACTCTTTCCCTACACGACGCTCTTCCGATCTCTGTCAT	CTGTCAT
P1_XbaI_3_R	/5Phos/C*TAGATGACAGAGATCGGAAGAGCGTCGTGTAGGGAAAGAGTGTAGATCTCGGTGGTCGCCGTATCATT	CTGTCAT
P1_XbaI_4_F	AATGATACGGCGACCACCGAGATCTACACTCTTTCCCTACACGACGCTCTTCCGATCTGGAGGTG	GGAGGTG
P1_XbaI_4_R	/5Phos/C*TAGCACCTCCAGATCGGAAGAGCGTCGTGTAGGGAAAGAGTGTAGATCTCGGTGGTCGCCGTATCATT	GGAGGTG
P1_XbaI_5_F	AATGATACGGCGACCACCGAGATCTACACTCTTTCCCTACACGACGCTCTTCCGATCTGCTCGAT	GCTCGAT
P1_XbaI_5_R	/5Phos/C*TAGATCGAGCAGATCGGAAGAGCGTCGTGTAGGGAAAGAGTGTAGATCTCGGTGGTCGCCGTATCATT	GCTCGAT
P1_XbaI_6_F	AATGATACGGCGACCACCGAGATCTACACTCTTTCCCTACACGACGCTCTTCCGATCTTAGAGTA	TAGAGTA
P1_XbaI_6_R	/5Phos/C*TAGTACTCTAAGATCGGAAGAGCGTCGTGTAGGGAAAGAGTGTAGATCTCGGTGGTCGCCGTATCATT	TAGAGTA
P1_XbaI_7_F	AATGATACGGCGACCACCGAGATCTACACTCTTTCCCTACACGACGCTCTTCCGATCTTCAGTCT	TCAGTCT
P1_XbaI_7_R	/5Phos/C*TAGAGACTGAAGATCGGAAGAGCGTCGTGTAGGGAAAGAGTGTAGATCTCGGTGGTCGCCGTATCATT	TCAGTCT
P1_XbaI_8_F	AATGATACGGCGACCACCGAGATCTACACTCTTTCCCTACACGACGCTCTTCCGATCTTTCCAAG	TTCCAAG
P1_XbaI_8_R	/5Phos/C*TAGCTTGGAAAGATCGGAAGAGCGTCGTGTAGGGAAAGAGTGTAGATCTCGGTGGTCGCCGTATCATT	TTCCAAG
PE2_SIC69_Sal1_F	/5Phos/T*CGAAGATCGGAAGAGCACACGTCTGAACTCCAGTCACAGCGTGCCCATCTCGTATGCCGTCTTCTGCTTG	-
PE2_SIC69_Sal1_R	CAAGCAGAAGACGGCATACGAGATGGGCACGCTGTGACTGGAGTTCAGACGTGTGCTCTTCCGATCT	-
