# Supplementary material for: Synthetic and genomic regulatory elements reveal aspects of cis-regulatory grammar in mouse embryonic stem cells
Source: eLife. 2020 Feb 11;9:e41279. doi: 10.7554/eLife.41279 (PMC7077988; doi:10.7554/eLife.41279)
Supplement: Supplementary file 4. [file elife-41279-supp4.fasta]

>chr1:39459379-39459460
actagggaacacttccaacccctttgtcttctgtgaccttggcatttccgagatgtcccc
accctgtctctttttatcaatc
>chr1:86309382-86309464
acccttgtcttgtttcctagttgagaggcgtgtcccatcaccaaggttgcatgacaaaag
acaacaagaaaagtctaacaggt
>chr10:19414126-19414207
acactcagctctgcttggcctctgggagaggctggctgcaaggtcaaatgaatatgcaga
ttgcccggcaaggtgctgcctt
>chr10:21109927-21110008
tggcagaggttattttcttctgcagatgattaacataacaaagagcctgaccctgactca
ggacaaccctcgctgttgattg
>chr10:45193670-45193752
taggttgctgaatatttaatgcatgcacagcattctgctcagtgaggggccaagtgaggg
tcaggttagggccgcctgctgtt
>chr10:60750966-60751047
aaggcaagcagtgcagaaggacaagcctgggctaaatgcatttacatagaaattggaacc
tgggtgggaacaagcatacctt
>chr10:68137554-68137636
tggaccatctttgagggtggggccattggctttgactctcatttacataacattagggag
gtagctttgtgtcaccggaattt
>chr10:81554481-81554563
aatttaataccttcctggacatggtatttacattacaacaggtggggagggcagaggtca
cagccaccactgcctgggagctg
>chr10:85539969-85540050
cctggggcggcttcacgggaccacacaggacaatacagggcgtagtctgacctctgctgt
ttcttccacaatattccagctg
>chr10:93188626-93188707
ttgcctttacaagtcatctgacacgccttccttgtggctttcagcattcttattcttcct
ttgttctatactcttggcggtt
>chr10:93364578-93364660
aggaagaaaatgatgctattagcaaaacatttgcatgacaacaaagaggggtggggtaaa
gcactcttcagtctgtcagataa
>chr10:108456620-108456701
aagtcatggagaacaggggttagactcagcatagaggaaacaaggccaggaggctggggc
tgtgttagggaagctactgaaa
>chr11:72022508-72022590
gtgagcccagagtgctgtacataaaggtcactgtaagcgaagcagacgctgtgcatcaca
atgctcagcctatcgaggtactt
>chr11:97950215-97950297
agacctcccgttctgtgcttggacaatggggtatccatggaaacagcactgcagagcacc
gcctgaccgggttcagccccggg
>chr11:109109987-109110069
tctgctaattaacgtttgtaaagaaggtcaaagggacaaaagccacaaaagcagggggta
ggggagaggagactgggcctgca
>chr11:109359483-109359565
actgctcaaaagtcctatcattgtaacccagctcgggggcagggcaggcccaaaccacta
ttttgcatatggattaactggct
>chr12:33345036-33345117
atgccactctctgcacacggcagggtgtggaacctcgacatgacctccagctgttctttg
taagggaaatggctttcttctc
>chr12:38778500-38778582
tttgtggtttgaggaacttgggcctttgttatgtattttttttctccttgatccgccacg
cccccaaccacgtgacccagaga
>chr12:70775033-70775114
aggtcctttctacactaatttcttttatatgctgattttgacctccctccccaccctatt
ctcttgcagcgatggcctgagc
>chr12:83527952-83528034
tctccagcttgacccatacaataggaaggtcagcaccccgcccagcactggtatgttttg
ttaggagagtcacgggtattttc
>chr12:86931582-86931663
atgctgcgtttagggagagcgagggtggagcccagattattgacctgtatggaggtgcaa
atgagggatgctcaagagagaa
>chr13:41737987-41738068
tcacaggaaatctcttcaagttcaaggttttaaaaggaacaatggagtctgttcatttct
cttgcaaatcgagcctgtgcgt
>chr13:69703646-69703728
tgcggctctcttgacttgctaacagcccctttgtatatggaaatggagtgggcggggcac
tgagttccctccgggctgctcaa
>chr14:55868337-55868418
cagacctgtgcaggcaacagggtgtggctgactcttgggttcacctctgaccttgcctct
ttgtcccgtgggtctagcctgc
>chr14:59806818-59806899
cttattcatatacaaatgctaattcatatataaaagacagcaccacccaattcctgaaca
ccaaggtcatttttggtgggtc
>chr14:60976433-60976515
gactgcctggcttggtcagtatgcaaaccctgaaggtcatgacctcattctcagaaggaa
cacccaacaatcgatcaaccttc
>chr15:25882211-25882293
gttgggtagaacgatgaagcaagtgaccttgaaaccctgggggcagggctttgcccattg
tgtagcagctgtttcattcaccc
>chr15:74692307-74692389
ctcattgaataaggaaaaaacaaagcgaaatggcattgggtcaagggcaatacagttcaa
accgcccagattgggctggagag
>chr15:87230070-87230152
tctgtctctggctggatctcaattcacttttgtcttgcaaatgaaacactgggtgcggct
gcctcttacagttccatcaagaa
>chr16:7797357-7797439
caggctcaggaaaggccttgttatgcaaacgagtccaaaagcccacactccctgccacaa
agctccatcttctatgcacctgc
>chr16:22545161-22545243
accaattctatatttagcctcaaggttatccctgaggcggggccagttttaggcattaat
gctaaaggcttgcagccaagcag
>chr16:22955780-22955862
agaagcatagctctttcagcactttgtgaaggccggaatgggcgtggcgtcgtggatgga
ggtcatacagagcggcagggaag
>chr16:31552037-31552118
atcaaaggaaaccggagtggattgcagatgtgaggggttagaggtcaagtagaggccaca
gccctccattcactataggaac
>chr16:35488904-35488985
tccattttcataaaaccctgggccacgcccagtggccttcagtcaatacagagcgaacaa
agaagtcaaactgctcccaggg
>chr16:36649424-36649506
ccatgctggcttctctgtttccttagctgtcctttattcactttcttgtgatgcaaattt
acactcattaatcattcggtcta
>chr16:42575681-42575762
gaagtgctctcactgaggcatgcccagatttgcaattcaatggcatgggggagggggggc
gactcagctgaagctaaatgcc
>chr16:42720043-42720124
ccccggggaaaggctttcaaacctattgttgagcagtaacctcaagggcaggagggtgga
ggctaagagtcaagacttccca
>chr16:76321809-76321890
gcctgcaggcgcccttgtactggatttgcaagacaaaaaccttcaaactggctgaaggac
atcttaaatctcttcaaaggtt
>chr16:87501907-87501988
agtgttaagtcagaacggcgatctccatgacgacggaggggagcggctaccaaaatgacc
ttccaaaggacggccacctctg
>chr16:96845634-96845715
ggcagtctgctccaagaggagtcagtgggtgtggctcacagcatatgcattacaaagccc
tggtaacttggagacacaggag
>chr17:26537919-26538000
ccgggttgtctccttttgttatgggaattgagcccagctggaggtcaatcttggtgaata
aaacattagcataaactctcag
>chr17:31934104-31934186
ggctgctttgaggacagagaacaatgggcctccaacacacagaggtggggcttgatgtca
aggtcagaggcccagcggacagg
>chr17:56420914-56420996
ttcctcttgaagacacaatgagccctgatgagctgatgggtggagactaggcacagacac
attccaaggccagtgtgcaaaca
>chr17:62109192-62109274
ttcactgagccatctctttgggagttgtgatcagaacaattgcctttgttattcaaacat
ttgcataaatgctcctcagtgtt
>chr17:66190749-66190831
ggtgtcccgtagtcgatggccttggagcgtcttaatggccaaggcgtgtctcaagtgcag
tcttttgtcattcaggtaaaggg
>chr17:74688806-74688888
tttagattgctatgtccttttgattctaaggcttttaaaagacaataggttcttagttta
ccacaggcgtggtaactaagttg
>chr17:83536119-83536200
aaactaatcacacaggctcgcctcgtgaatatgcattacaatggaagtcaaggccaaaac
caactgtcaccatacttcctgt
>chr18:34778729-34778811
ttcttttctgattcacaaattcaccttggaagcaaatcgttcttcagatccacccttatg
tgcatattctgacctgaggtgtt
>chr18:47358689-47358771
agtgaagattaaacccaaagtaaaggtcaaacctttacattgcaaagccaagcacaaggc
gtggccccaatgatgtcatcacc
>chr18:62820577-62820658
tgcagaccctgggaatgtctgaaggtcaagttccagtcacacccttttcatggatttgtt
ttgttcttttattgtacacatt
>chr18:63924767-63924849
tctaatgcttcttttctttttcctttttgcccgctccctgtttagcatcacaatggggct
gcctctgagccctgcagctgact
>chr18:67288619-67288700
ccggggaagtgtcttcctagtatttgcattttcacaataggcgtggcttagttttcaagg
ttaaaaaggttactcctcgcca
>chr19:37401085-37401167
cattcactagattttcattcaaatgcctggatcttcattgttattagtgagagagcaagc
tgaaggtcacatgcagttagcag
>chr2:75960366-75960448
cagacaaggatgccacgaactgggtgtgtcactttggccattgtctcctcacatctgacc
tggagctgcccatggatatgcgc
>chr2:91787049-91787131
tgcctgacaaacaacccttccctcactgaaggtcaaattagcatctggtagggctgagct
aaattatccctcttgcttctctg
>chr2:102054457-102054538
aagccacattcaggtagaattttcaaggtcacctgaatgatgttcacgcccatcatctgc
atagcagctgctgctgtatcta
>chr2:172499000-172499081
tcttcccggagaaggatctggaaagccaggtttgcataacaatatctgcccttgccatga
gccttcctttctgctgagcaga
>chr3:28842463-28842545
cttcagtgcttagggatgttttgcatatgaaaggaacaacagcagctttgtctcagaggg
gcagggttctagctttgctccag
>chr3:34758017-34758099
gctgttacccaggaagttgtttagcatagtcccaggactctgctaagggcaagtactgtc
attgttatttatttagccccatt
>chr3:85338346-85338428
gtacattcaaaaccagatgccttcattaaggtcacccctttccctcattgtaatgcaaat
tgccagaactaaggcatctaaag
>chr4:55005156-55005237
taaaaggaatagctacagcctttgtgtggaagggtgtgtcttttggcagggtctgctgat
gcagacagactggctggtgatt
>chr4:132315869-132315951
gctgtggaatgaatagccttgctcatgctaagcaatgctcgaccttgagcgctcccctcc
cacagctgccttatttgttgagt
>chr4:132959432-132959513
ctcctttccaagtgaccttcacatttggctgttgacccaagggtgtgacatgtctcttcc
aggagacaatggctcccctgtg
>chr5:28398937-28399018
acccagctcacctctgagtgaccttggttacttgatttacatctttgcttatcagtaaaa
caaaggcctagttcctttccgg
>chr5:35718016-35718098
tatagctcacaggctgtagtccaaggtcaagacagcaggcataccagggtgtgtcagatg
caaaagtccagcctccctctgag
>chr5:52236769-52236850
tggagaacaacagaaggcgtggtacacacaaacaccttttcccaaggacaacagcaaaga
gaaagaaagacttttttttttt
>chr5:64299030-64299112
tgcttggagtgcagtgctagcaaatgctaacatgcagcaggagttcaagggcaggccggg
ggagagtataaggaagtattagg
>chr5:75365877-75365958
gccatttgggaacaaggcatgcatattccaagggccagatttcaaagtcaaattacagct
ccacccattctctgtaccctgg
>chr5:100680282-100680363
ctctcggctggtcttttattcgcctttgtttaagactactccacccagccatctgtcctt
tcccagacttgtgaaggacgaa
>chr5:104002963-104003044
ttaccctgtcattcaggtctgcatttacagctgtgacctccggtctttctctccttgttt
ccccacctgttttcccacaagc
>chr5:112228362-112228444
ggggaagggaagggtctttgttccccctcagaccgtgactaccagaccctgagcatcctc
tgtgtttccatccccatggtcca
>chr5:124213766-124213847
tcctctgcagcagacagtgaccttgctgaggcctgtcacggggacaatggcaggaagcac
cccacccagcctgagcctacac
>chr5:125166160-125166241
tccccatggagacctggactcctcctcacccccatctgcatatctgaggccaagaacaat
acaagcaccaacagagcctgta
>chr5:129156126-129156207
ccagagaagctatattgtaacgatgctaatgggggtcaaaacaaaaggagaaaaatccgc
ccacttccctaggtctgggtct
>chr5:129196723-129196804
ctctggaaaccaaaggtattcaaatgaaaagacgtggcaggtgggccggaagggtctgtg
accttgtggctgggagctgcta
>chr5:130950409-130950490
acaagctgggaggtgaagacaaagaccagaggttgtgacctccacgcagatgctatggta
tgcacatgtctgcacttagaca
>chr5:148005468-148005549
gcagggcttgatgctacaagctgggatttgcatctcaaaagaaagggcacatttttgttt
tgtatttctctggttcttctgg
>chr6:30375294-30375375
gcactaggaatcctgaggggggaggggctgccttggtgaaggtcaggctgacataagaac
aaagaggggaactgcttgtctt
>chr6:54097017-54097099
ggcagggctcccggcctcaacccccacagccatccttttgtcagtcacagtgggtgtcct
tcatccagagctttcgggaactc
>chr6:72623138-72623219
cactgttgtcagcagttaacaatggaatagatggagacacaccttaatgcaatgtggatg
gaggtcacctctatgtcagcac
>chr7:4124344-4124425
taaatctgggggctctgtcttttccaccactccacccaccattagcatcacaatgacgtc
tctccagcagggggagtgaggt
>chr7:12885934-12886016
cagcatcttactttctaggccacaccctttctcattagcattcccagcatcctcttcctg
gccttccattcagttcttgcacg
>chr7:19609764-19609845
agattgttttctaattatcacaatgaaggcttcaagtgactttggcctcaggaatgaggg
tggggccacaagacttgggaaa
>chr7:43465963-43466045
caattgctaatggacagagcaaacaaagtcccgtgcatagggcggggccgatgggtttgc
agattaccggtggaagaggtgaa
>chr7:63957217-63957299
caaagcccgggagagccgttgggcaatcacttttgtcatgcaaatgagggcggagcatag
ccgccccctctgcctgcatgcta
>chr7:81211813-81211894
gctagcctcctttcctcagccccaccctgctattgacatcaagctcaaggatccctaaga
caaagcagggccgctgtgagcc
>chr7:81867686-81867768
aggctttgggctagagtttgggtgtggcttcctcccccattgtgattgaatttgatttga
ctttgggcaaaaggctgctttcc
>chr7:107594477-107594558
ctgggattcggtctccaggttttttttgtttgtttgttttgcatacttgtacctgacctt
gcagggcacaggaagtgttctg
>chr7:120861077-120861158
tgttgggtttaggtgaggtttgaaaggtcgcttagaaatgtaaatgagatcactgggtgt
ttcctggcctgcagggttacag
>chr7:127925435-127925516
tactcattcctgggatcccctcccccccaagggccaaggctcccttttgttctcatcccg
tgaaggtgaaacctggcctgct
>chr7:142427512-142427594
tcaggaagggctgtgcttgtaaatttgcatatctgcagtttttgtctgtgcccatgtcct
tgaatgtgaccccatgcatacta
>chr8:34732804-34732885
tctgaaaacctttcataaggacacacccaggggaaaccatttgcattttgatgacatcct
ttgtcccgagtcttacttccaa
>chr8:48752101-48752183
tcctctccacctactcaaagtccctccctgtaatgatttgtacaatggagccaaggaaat
gcaaatttgattgcaggcgcttg
>chr8:70648955-70649036
ctcgttattcaaactgcaggcccacacccatagatgcctttgtagggacagcaaatcacc
ctggggcactccagggtgccct
>chr8:123682464-123682546
ttgaacactcaccatgaccttgggaagcgagtgcatatccaacaaagctgctctatgttt
aagccccgcccacaggctcatcc
>chr9:46329529-46329610
gggctgaaatgcaagagagatttgaatggcaaaaaggtcattctcttgccgtaccctggc
ggggtcggaagcctgtgagaca
>chr9:50124354-50124436
gtctaaggccttttctactctgctgattgtttagcattacaatggtggggatgggcaagg
catctgtgagagatctgcagtca
>chr9:83448018-83448099
cactcctctgagctatgacgctgccctttcctcctcctccctccatagccgctgctcttt
gtggcgcagcatctcactcagc
>chr9:102690588-102690670
agcgagcctcccattggagccccgggtgggaacccatttcaaatgcagatgttctctttg
tctgcctgcgagtttgcccctct
>chr9:110250359-110250440
ttggagcctgggaatgtccccaagggcaagagaaagtcactcaacaaaagaacgaaaacc
cacccagaggggttgactctcg
>chrX:114694676-114694758
ggtcttatcaaagactgtggggacaaagagctatctgtcctgcctattagcataccaaag
gtcaaactggcctccaggctttc
>chr1:63092160-63092242
ggatccttaatggaaggtgtgatgagcataattgcccttctcagacgcagcccctgacac
gccctactccggcagttctgatg
>chr1:186261658-186261740
tgatctacagagggtttccatcctccttggcaacccctgacctctggcagtttgcccagg
gctaaacaatgatccagaatccc
>chr10:18597642-18597724
cagggggccaaggaagaagaaaacaattttgcatccctcattgtggcatcttaccttcac
tggcttgagggtggctgagaagg
>chr10:82007778-82007859
aggctgttttggttcccctggggtgtgtgtttgcccaaggttgaatgtctaggctgatgt
aaattcacatgagtctttgagg
>chr10:128631710-128631792
acctctgctctcatgggcgttagcatagcctcggaggagcatagtcctttgtgttcctgg
gaggtcacaggtgctaagactga
>chr11:5040653-5040735
tgccatggggtgcctgagtgcctgggcggggccagcttctagggcactctgggtactttg
taaaccccactgctgttcccagg
>chr11:6600403-6600485
tgctgagtgtggaggaggctctgcatccccctccttaggcactggccttggtcctgaggc
cacacccaattcctgatgggcct
>chr11:8855538-8855619
gccacacttacggatgctcactgaccttgtttttcctaggctatgcatgtagctctcttt
cttcacgccacaggtctcaggg
>chr11:11881895-11881977
agagtaagtactggggatgagtcaaatccattgtgattagcattggagctgaccttcatg
tcctgttcccagcactgccccat
>chr11:54860494-54860576
ctcccttgccggggtcttgagcctcagcatccctgcaccctcctcccggccctgtcacct
tggcgggctgacccatggctccc
>chr11:62494716-62494798
caggaacgctgcaggatggcctcagcatggggagacagcccctgcctccctaaatgagcc
cttggtgaggacgggccaactgc
>chr11:72951250-72951332
gccaggagaaagcaccatgacctttctgaacacccctttgtcatggcaagcacgtggagg
ggtgtgacctcatagctggtatc
>chr11:80137985-80138067
tccagcacagtcggtctccggtcaaggtgagcccatgcaattcttcgagtaccaaaaaca
atagatacgatactcttaactgc
>chr11:87109019-87109101
ccataaggcagccaatggaaaaattcatatattcagcagccaatccccctgcggcgtttt
gtgtctttgtccaacaggaaagt
>chr11:97813325-97813406
gctgaggacctggggagagggtgtggcagtctgcacgtgtctggctgtccttgggccaat
ggagatggctttctgccttaca
>chr11:103325196-103325278
cccccccatctcctttccaagttttgtctcttctaagggtatgtgtcctttgctttaccc
cagccttagagcttaaagtcaca
>chr11:109476444-109476525
cctgtccacacttatagtctttgggttgggttgctaggcagatatgaccctggcttgcaa
ataagctcgtggcttttaccag
>chr11:118034688-118034769
gcgtcagcccattacaggcatttcatggaaatggggctgccctcgctgagaccctcaccc
ctcgctgagaccctcaccactg
>chr12:80216574-80216655
gcctaggtttcacctgccggccacacctctcctggacacagctttgtctcttggaaccaa
ggttagcagtcctggctcactt
>chr13:37345246-37345327
gtatgtgaaagccccctggaacagtattcaaatgcccctccccgctgtctgtctttgtct
tctcacagtatatttcccagag
>chr13:43209526-43209607
ggagccttcagaatctcccaccacagtgcccctccctgtgtctgcatgccaccttgccag
cactagtgctctctctcagcag
>chr13:57984446-57984528
tctgttcaggacacaccgtatgggctgggaaccagcaccatggtacaatggacttggtag
gtcagtcaggttaaaccacagca
>chr13:64439142-64439223
agagactcacgtcctacagacaaagcctccagaaactgctagctgtgtccttctccaggg
ccacccctcagtggtgccaccc
>chr13:112001244-112001325
ctctgagtttcgggaggatggaaacgggaagagacaaagatgctgccgttggctgtaggg
ctgtggtgtgaaggggctttct
>chr13:113041439-113041520
acatctactgggacagtcaaggtcactctctgttcagctttgtgatcacccacctggtag
ggtgggtctgcacagcctgtgt
>chr14:57826081-57826162
agcttacagtggaaactctggatggggttcatgctgagggccgccgagccgactgctgac
ctccagtcccctcgaacgaacg
>chr14:105851574-105851656
taggctctagcatgagggaaaatcaacaaagagccattctagggcatttccaaccccacc
taaggcaaagctctgagctatag
>chr15:55318105-55318186
caatgctttgataaaaagacaaaggcgcttagagttagcatagatgcacgagatctcatg
cccttaacctggtatcagagga
>chr15:59302359-59302441
ttacagtctggaagacactgccctaggggtctattgatcaattgcatctgagagtttggg
gtggtggtggtggtggtaagaga
>chr15:72568757-72568838
tctctatgacttcactcggtttagggaggcgctgtcctaggtggctaccagaagcattgt
gtgattaatcagcaggtttgaa
>chr15:74675213-74675295
ctttagagcgctaagatccaggtgaccttggttccacagccctgtcagtcctggcccttt
gtccccagcattccagataccct
>chr15:77864492-77864573
actggcacatcaaagttcgcacgaccacgcccagctttgtcacccaggaacagaaaggtc
acgttcacacatgggtcaaaag
>chr15:82209826-82209907
aggaaaagaggggagccatggagatccctctgtggcagcccaacacccaaaggctgtatg
accttgggcagctgcctccctg
>chr15:89158153-89158234
ctagggggcagcagagggaggggaggtctccacagacctttagggactagaagaacaaga
taagaaagacagcatagactta
>chr15:97557760-97557841
gttacagcctgtgactctagtttctcacccttttgttgcaaggtgagggtggatcatcag
accatccacaaacttcatggac
>chr15:101082277-101082359
gaagtctctcctctcttacaaagtttacaaacccaggacagggtggggaattagaaaacc
agtttgcatggaaggtcccttgc
>chr16:17260686-17260768
ctatactgactcagtacagggtcaagctaacccttccatgggtgtgtcagccagcctcag
atgtttgcatgggcttctgcaag
>chr17:8802786-8802868
agattctggggagctggtgcaagggtgggtgaagaaagccaaggaacaatggggcgttag
catagaagaaaaaggcacctctg
>chr17:27069900-27069981
cctggtctgataggctacgctctgacctttcccatcctaaatccagacaaaacccaccac
cctggtaccgccgctggggcca
>chr17:29050747-29050828
tgaaagcaccagccagcctgaggggctgccattgtggtgaccttggagaccaaccctagc
cagcttctgccagggcttctgg
>chr17:31116633-31116715
cgtaaaaaacaacagcccaaggacagaatttacagggctttgtcagagagaggcctgtgg
ggccgtgtcagattgaggctcag
>chr17:33843547-33843628
agctcaatgtgggctggaaggcttttgtttctgattttgacctctcaccacgcagggctg
gtcacccggtaccttcttgcag
>chr17:36234499-36234581
ggtctgagaccctccaagggatgcaaggtttctctccttggcgcaaacccagtctctgct
ttgtgttcccagcatggtgtaca
>chr17:45581919-45582001
cagaagccatcagtgtagttactcagggacaaggctatgcattagaagagtttgaggtgg
gggaggctgaagagagatctcag
>chr17:70848772-70848853
ttttcgggcggtctcggctttctacagagggcactctattaccatataccagtctttgtt
gaaagatgctcactttcctaaa
>chr17:70872724-70872806
gctgcacagccttccagaggattatgccaatgaacgagggtcctttgtcagaagtccctc
cccattcactcccaaagctgttt
>chr18:43034268-43034350
ggagtaattagatattatttgcatatcagacagttctttgtaagcctcaaagcacattgc
tgacctatagctgtctgctggct
>chr18:62004397-62004478
acatctaaggtgcccacccaggtgccacctggatggccatctgcaagtagggctcttgct
atagtaaaagggcagaatgacc
>chr18:65590237-65590319
tgcttagctctgggtggtgaggctgcaggactggttagatgaccttgtcaaattctgaag
tgtcctatttgcatgatcctctg
>chr19:10233087-10233168
taattgcagagtgactccttgaccttgcagaccctcagcatctttctccacggagtgtac
aatggtagcgcctcagaaagct
>chr19:21789256-21789337
cagatgtcttgaggatgccacctctcttttgtctgaccctcatggtttctgccacagccc
tctaatgacccactctaatggc
>chr19:21818010-21818092
aggtagggtctgttttctcctcattgtacacctaggcttaaccttcagggggagatcatt
tgcattcgagcacctggggtgct
>chr19:43606979-43607060
cgcagcctggaagcccccaagtccttggccttggaccccacactgaaaaatctctacatg
ggctcagatgcgtcgtcctgag
>chr19:47813156-47813238
cccctggcactgagactgacagacaaagctgtcagcggactagggagggacagcttcacc
tagacttgagatatcgatgtaat
>chr2:32637850-32637931
gggtcttctctggcgtcactggggtgtggtgggcatcagaaggtcaccgatgctgtcatt
gtcttctggtctctagggacat
>chr2:52090145-52090227
atctgaccgcatttgcttttccattttagagccactggaacacccgctaatcagcagccc
ttctttcttctccaagtatgcgc
>chr2:91043239-91043320
atggcccggaaggtgcaagacaaggtgaggccagaccctttcgcgtggctaaagctcact
tgcatgctcccaatctggggct
>chr2:129166931-129167013
agaagagaaatacaagccccacagttgctgggactggcgctattgttcctcagcatggcc
tgctttctatagagagccatgtg
>chr2:131180170-131180251
ctgaggcccggactgtgcgcctcggccacgcgcgggaaaggtcatcggcagagacaaaac
gcacttaggcacctggacagat
>chr2:135199515-135199596
ctcagtaatgagagcatcatttcataccccagaggtcagacaaagagggttggtcccatt
gagagataaatcagcgtcacaa
>chr2:144186602-144186683
ctatctcaactgccaggaactaagggtgtggaggaagtggtcagatgcagagcaaaggac
aggagaccaaattcctgccagg
>chr2:157328664-157328746
agagtctccctttcagctcagctccctctttgtcccagaccttggcaggttccccgcctc
ctgcctctgcctgccctcctggg
>chr2:163889616-163889698
tggtgctagccaagcacagaggtcaaggtgctggccgggcacaaaggcctgggcctgtct
gggtgtgggatggggggctcaca
>chr2:168825735-168825816
tgctctctgactttaatctaccacccttcgaggacagcattgttgataaatgcagaagga
tactcggcagatactccgttgg
>chr3:89266621-89266703
cgggcagagtggaaagacggaaatgggtggcggagactgggaataaatgtcagatgcaga
gcggggatcggtagaaagaaccc
>chr3:102011440-102011521
caggtctctcctgggcaaattcgaggccaggagccgaacctacatcccctccctggcttt
tgtttctctgaagcgaggctct
>chr4:59897311-59897392
aaccaccatctctaaactcccacacttgcatctgtctcttcccattgtagcctgaccttg
gtgtctccctgtatctgaggtt
>chr4:82542259-82542340
aggcttcagagcctgtctcaaggctctgaaggacaccaggacaaaggatactgcgccctc
tggtgttagattcatatcggat
>chr4:132949936-132950017
ccagccaaaggcaattataatgtgcatgactaacatgagactctacccttgggaagtcca
cagccataatcccaccagcgcc
>chr4:133675732-133675813
agtggctgccaagcaaaggagccaatgagcttcagagtattgtttaggcagggcttggct
gctgtccagctctgaaagaagg
>chr4:134307315-134307396
aaatctgactttattatgcctttgatgttaagttaaatgcagataagcacgctgcctctg
tctttgttgggggctcagtgca
>chr4:141284238-141284320
acgggttctgctcaagtgtgcacacaagggcacacgtgcatattctgcattcagacccag
cctttgctatggtctgagttcta
>chr4:152312442-152312523
ccttcggccaggagcacctttgtgctaatgaaacggtgtggcgagggtttctggacaggt
gaccctgacatctttcccaccg
>chr5:33536581-33536663
taggtaccagggagccaaggccaccgaagtgggagagatgggtgggtgacatcccactag
aagctctgcattaggctaggctc
>chr5:53509392-53509474
tcattgaaaggctgcaggctcatgctgatggaagtgctgttgatcacccaccctgagctt
tgtatggggaactggggagacat
>chr5:66080361-66080442
gactcagtgctcccgaagcatgctaacccagaaatctcccaaggtcattgccagcaacac
aaagagactctaaaattgctgt
>chr5:66815981-66816062
tcatgcaagcagtctgagcaatctgtcccccctccctccattttgtccgatgcaattacc
ccattacatatcagtcacttaa
>chr5:115231058-115231139
ggaggcagtggtgaaggtcacttcaggccactccaactaaccaggccctggccactgtct
ggctgatgctagtgactgacca
>chr5:117863083-117863164
aaatcccatgccgagggcgtggctcccttcctagccaagggctcccactctccccattcc
tcccattgtggaaatgaggccc
>chr5:119629732-119629813
gccaggcgccttaattaagggggttggggggaaggggaacacatatacaatggaagcaat
gtcatcatggctcctggccacc
>chr5:124178422-124178504
caggtcagacacaactgcaaggtggcagaaaggtctcaacctgcatactggacagcaacc
acacaatggacagatgatactgg
>chr5:135965800-135965882
tacagtgccccagacgccaccatgcagaatctccactcggccttgacacgggctggcgcc
gcccaccagacgcacactgccct
>chr6:70964286-70964367
cgaggttagagtcctgcctttgcctttgtcatggaaagctgtcagctggggttaggtggg
gttaggtgactggcacccagag
>chr6:89354687-89354768
ggcacccagacatctgagtccttcaaggtcactggacatgcacccacccacctcatgcag
acccagtctccctgtcagagaa
>chr6:118769907-118769988
gctacaatcctaggagttaacgactggggcgatgcgcacaaggtcacaccttgcagatga
ctacctaagttcggaaactcct
>chr6:140338171-140338252
caggcagtcccaggcgtattaatgcaaggagtgtccttgggatacctcctaggtactgcg
cccttttgaaaggtctcagaat
>chr7:4664622-4664704
ggaagagctgtgggagtcagcaaggacgttcccataccactcccatgcgccccagatgcc
tttgtcaggccatctgctcacct
>chr7:37553998-37554079
tgtctttgagtcactcactgtctctcaccacccacacactgacacaaagggtatgtaaag
gattccaacaagggaccctagc
>chr7:80962986-80963067
atacttgggagaatccagtctcaaggtcagcaagtgccagcccagggaggagtagaaaga
aagacctggtctctgagaagaa
>chr7:107236814-107236895
agagtgggtcccaaaccagatgtctggctttgtcatctacattcaactagcaaggtcagg
ccttgttcctgacaattctgtt
>chr7:144938714-144938795
ctcctgctgaacatctgaaaatgtgcttttgtccccctccgcccccagtttgacctagac
aggttcctccaaatccagaacc
>chr8:44979389-44979470
ctgcctgcctagattccctaaccttgattacttctcttagcacccatttgcacgctatct
tttgtcattaaaatatcaaatt
>chr8:60954437-60954518
agcagctcactgcagcacggaggacaacagccagcctgttcccagaaccgcccagccgca
tgcacaacataccaacagagaa
>chr8:61505308-61505390
ctatagttatgagccacactgatcttgagcttagggagtgtcttcccctcatgaaaagct
cagcatagctagctgtttaagga
>chr8:71570164-71570245
gatgagggggatgatggaggctgtccttgtaggaacacccagcctctgaggccggataag
catgaggataacaagtgaattt
>chr8:118848626-118848708
aagggaacctgtctcaagtgtgcgaggggcaggaaggggacatctgaatacacatcggag
ggcaagtgatagaaataggggtc
>chr9:9961010-9961092
tacttaagggaaaaaggaagcaagagacaaaaggaaatggaaaggcataattgaaggtct
ttggggaagactctgacactctt
>chr9:46150315-46150396
gcaccaagcctgcttcctctaccctgcggcaccctgaccttcacgtctgaggacaatagg
agagcaaagtgagcactctcat
>chr9:58743939-58744020
ttcccacctgcaaactcccttcctagacaatacacctgcatccagcttttgggccaccct
catctgccaagagcaggccagg
>chr9:65084582-65084663
aacttcggagtgactgatacccaaggtcatgtgcttgcaaataagggagatgttggggtt
gggtgcagatcatgtgggagct
>chr9:119932424-119932506
aacagtaacatgaaacaagtatgcccaaggtcacacggttaacaaaagcaccgatccacc
cgctgtcctctgaggacactgga
